# Supplementary material for: Docker4Circ: A Framework for the Reproducible Characterization of circRNAs from RNA-Seq Data
Source: Int J Mol Sci. 2019 Dec 31;21(1):293. doi: 10.3390/ijms21010293 (PMC6982331; doi:10.3390/ijms21010293)
Supplement: Supplementary file 1 [file ijms-21-00293-s001.zip]

Archive with 20 entries (20 files):
- Supplementary_Materials.pdf
- __MACOSX/._Supplementary_Materials.pdf
- Supplementary_Table_1_All_CIRI2_circRNAs_predictions.xlsx
- __MACOSX/._Supplementary_Table_1_All_CIRI2_circRNAs_predictions.xlsx
- Supplementary_Table_2_Merged_CIRI2_circRNAs_list.xlsx
- __MACOSX/._Supplementary_Table_2_Merged_CIRI2_circRNAs_list.xlsx
- Supplementary_Table_3_All_STARChip_circRNAs_predictions.xlsx
- __MACOSX/._Supplementary_Table_3_All_STARChip_circRNAs_predictions.xlsx
- Supplementary_Table_4_Docker4Circ_circRNAs_Classification.xlsx
- __MACOSX/._Supplementary_Table_4_Docker4Circ_circRNAs_Classification.xlsx
- Supplementary_Table_5_CIRI_AS_results.xlsx
- __MACOSX/._Supplementary_Table_5_CIRI_AS_results.xlsx
- Supplementary_Table_6_Docker4Circ_circRNAs_Annotation.xlsx
- __MACOSX/._Supplementary_Table_6_Docker4Circ_circRNAs_Annotation.xlsx
- Supplementary_Table_7_Differentially_Expressed_circRNAs_cell_lines.xlsx
- __MACOSX/._Supplementary_Table_7_Differentially_Expressed_circRNAs_cell_lines.xlsx
- Supplementary_Table_8_Quantification_and_DESeq2_results.xlsx
- __MACOSX/._Supplementary_Table_8_Quantification_and_DESeq2_results.xlsx
- Supplementary_Table_9_Running_times.xlsx
- __MACOSX/._Supplementary_Table_9_Running_times.xlsx
