# Supplementary material for: Docker4Circ: A Framework for the Reproducible Characterization of circRNAs from RNA-Seq Data
Source: Int J Mol Sci. 2019 Dec 31;21(1):293. doi: 10.3390/ijms21010293 (PMC6982331; doi:10.3390/ijms21010293)
Supplement: Supplementary file 1 [file ijms-21-00293-s001.zip › Supplementary_Table_1_All_CIRI2_circRNAs_predictions.xlsx]

## Sheet: SRR5889371_NCM460_rep1
circRNA_ID	chr	circRNA_start	circRNA_end	#junction_reads	SM_MS_SMS	#non_junction_reads	junction_reads_ratio	circRNA_type	gene_id	strand
1:566152|566440	1	566152	566440	10	1_5_0	15486	0.001	n/a	/n/a	-
1:741179|745550	1	741179	745550	30	4_5_4	5	0.923	n/a	/n/a	-
1:1158624|1159348	1	1158624	1159348	8	4_3_1	217	0.069	n/a	/n/a	-
1:1191425|1203372	1	1191425	1203372	9	2_3_2	85	0.175	n/a	/n/a	-
1:1192372|1192690	1	1192372	1192690	41	11_9_1	198	0.293	n/a	/n/a	-
1:1192372|1203372	1	1192372	1203372	5	3_2_1	113	0.081	n/a	/n/a	-
1:1417518|1454370	1	1417518	1454370	4	3_3_0	7	0.533	n/a	/n/a	+
1:1496712|1500296	1	1496712	1500296	9	4_3_0	31	0.367	n/a	/n/a	-
1:1499985|1500296	1	1499985	1500296	12	6_6_0	17	0.585	n/a	/n/a	-
1:1586823|1588948	1	1586823	1588948	3	2_2_0	2	0.75	n/a	/n/a	-
1:1586823|1650894	1	1586823	1650894	7	2_2_1	6	0.7	n/a	/n/a	-
1:1586823|1654270	1	1586823	1654270	5	2_3_1	2	0.833	n/a	/n/a	-
1:1599766|1671143	1	1599766	1671143	21	3_6_1	21	0.667	n/a	/n/a	-
1:1666129|1671143	1	1666129	1671143	6	2_2_0	24	0.333	n/a	/n/a	-
1:1724684|1747301	1	1724684	1747301	3	0_2_2	745	0.008	n/a	/n/a	-
1:1724684|1749314	1	1724684	1749314	7	1_0_4	639	0.021	n/a	/n/a	-
1:1735858|1737977	1	1735858	1737977	63	23_12_10	802	0.136	n/a	/n/a	-
1:1735858|1747301	1	1735858	1747301	4	1_1_1	727	0.011	n/a	/n/a	-
1:1735858|1749314	1	1735858	1749314	67	24_1_24	621	0.177	n/a	/n/a	-
1:1735858|1756921	1	1735858	1756921	5	1_0_2	456	0.021	n/a	/n/a	-
1:1737914|1756921	1	1737914	1756921	4	3_1_2	582	0.014	n/a	/n/a	-
1:1747195|1756938	1	1747195	1756938	25	7_5_7	772	0.061	n/a	/n/a	-
1:1747195|1770677	1	1747195	1770677	9	3_1_2	665	0.026	n/a	/n/a	-
1:2140772|2141658	1	2140772	2141658	2	2_1_1	6	0.4	n/a	/n/a	-
1:2327223|2332374	1	2327223	2332374	2	1_0_2	74	0.051	n/a	/n/a	+
1:2327223|2333781	1	2327223	2333781	4	2_2_0	137	0.055	n/a	/n/a	+
1:2336479|2336661	1	2336479	2336661	6	3_2_0	267	0.043	n/a	/n/a	-
1:3784538|3789136	1	3784538	3789136	9	1_1_3	0	1	n/a	/n/a	+
1:5987709|5993389	1	5987709	5993389	3	2_1_0	28	0.176	n/a	/n/a	-
1:5987709|6012896	1	5987709	6012896	5	2_1_0	71	0.123	n/a	/n/a	-
1:6007164|6012896	1	6007164	6012896	25	8_8_2	79	0.388	n/a	/n/a	-
1:6007164|6022009	1	6007164	6022009	50	10_11_9	35	0.741	n/a	/n/a	-
1:6021854|6046387	1	6021854	6046387	5	2_2_0	55	0.154	n/a	/n/a	-
1:6291962|6292179	1	6291962	6292179	9	2_2_0	105	0.146	n/a	/n/a	-
1:6291962|6293703	1	6291962	6293703	20	9_9_0	103	0.28	n/a	/n/a	-
1:6341162|6355040	1	6341162	6355040	9	2_1_2	44	0.29	n/a	/n/a	-
1:6604886|6609758	1	6604886	6609758	9	2_2_0	28	0.391	n/a	/n/a	-
1:6647265|6648256	1	6647265	6648256	3	0_2_1	39	0.133	n/a	/n/a	+
1:6867043|6885270	1	6867043	6885270	27	8_9_4	19	0.74	n/a	/n/a	+
1:6867043|6948959	1	6867043	6948959	5	1_0_3	5	0.667	n/a	/n/a	+
1:6880241|6948959	1	6880241	6948959	5	2_1_3	18	0.357	n/a	/n/a	+
1:6931817|6948959	1	6931817	6948959	3	1_2_1	10	0.375	n/a	/n/a	+
1:7837220|7838229	1	7837220	7838229	12	4_1_2	26	0.48	n/a	/n/a	+
1:8482787|8601377	1	8482787	8601377	13	2_4_4	403	0.061	n/a	/n/a	-
1:8482787|8674745	1	8482787	8674745	3	0_2_2	55	0.098	n/a	/n/a	-
1:8525985|8557589	1	8525985	8557589	2	1_1_1	213	0.018	n/a	/n/a	-
1:8525985|8601377	1	8525985	8601377	13	3_2_4	406	0.06	n/a	/n/a	-
1:8525985|8617582	1	8525985	8617582	4	0_3_3	108	0.069	n/a	/n/a	-
1:8525985|8674745	1	8525985	8674745	9	2_4_2	60	0.231	n/a	/n/a	-
1:8555123|8601377	1	8555123	8601377	29	7_6_3	424	0.12	n/a	/n/a	-
1:8555123|8617582	1	8555123	8617582	75	5_10_19	125	0.545	n/a	/n/a	-
1:8555123|8674745	1	8555123	8674745	15	4_5_3	77	0.28	n/a	/n/a	-
1:8568686|8617582	1	8568686	8617582	29	3_8_16	231	0.201	n/a	/n/a	-
1:8568686|8674745	1	8568686	8674745	10	1_4_5	183	0.099	n/a	/n/a	-
1:8583112|8617582	1	8583112	8617582	4	2_2_0	83	0.088	n/a	/n/a	-
1:8601273|8617582	1	8601273	8617582	116	17_15_28	313	0.426	n/a	/n/a	-
1:8601273|8674745	1	8601273	8674745	175	17_23_14	271	0.564	n/a	/n/a	-
1:8601273|8684439	1	8601273	8684439	11	2_2_2	239	0.084	n/a	/n/a	-
1:8616534|8674745	1	8616534	8674745	36	8_14_7	411	0.149	n/a	/n/a	-
1:8674620|8684439	1	8674620	8684439	10	3_3_1	74	0.213	n/a	/n/a	-
1:9931245|9938047	1	9931245	9938047	8	3_4_3	28	0.364	n/a	/n/a	-
1:9991949|9992956	1	9991949	9992956	8	0_1_4	67	0.193	n/a	/n/a	-
1:9991949|9994918	1	9991949	9994918	157	18_19_40	22	0.935	n/a	/n/a	-
1:9991949|9995685	1	9991949	9995685	12	1_5_4	8	0.75	n/a	/n/a	-
1:10155519|10165802	1	10155519	10165802	83	22_20_4	15	0.917	n/a	/n/a	+
1:10195046|10197263	1	10195046	10197263	8	4_4_0	10	0.615	n/a	/n/a	+
1:10327438|10328321	1	10327438	10328321	14	5_3_0	21	0.571	n/a	/n/a	+
1:10327438|10332364	1	10327438	10332364	5	2_0_2	22	0.312	n/a	/n/a	+
1:10500404|10502498	1	10500404	10502498	13	2_3_2	24	0.52	n/a	/n/a	+
1:10527247|10529395	1	10527247	10529395	22	8_6_1	42	0.512	n/a	/n/a	-
1:11076901|11078930	1	11076901	11078930	2	2_1_1	107	0.036	n/a	/n/a	+
1:11083250|11085265	1	11083250	11085265	3	2_2_0	34	0.15	n/a	/n/a	+
1:11130957|11137005	1	11130957	11137005	15	1_2_4	97	0.236	n/a	/n/a	-
1:11133991|11137005	1	11133991	11137005	53	6_6_14	118	0.473	n/a	/n/a	-
1:11181303|11182183	1	11181303	11182183	19	10_9_1	68	0.358	n/a	/n/a	-
1:11883764|11887278	1	11883764	11887278	5	1_1_1	7	0.588	n/a	/n/a	+
1:12049222|12052747	1	12049222	12052747	2	1_2_1	52	0.071	n/a	/n/a	+
1:12058827|12059152	1	12058827	12059152	5	0_1_2	189	0.05	n/a	/n/a	+
1:12359259|12364785	1	12359259	12364785	9	3_3_0	56	0.243	n/a	/n/a	+
1:12359259|12368698	1	12359259	12368698	19	9_9_2	26	0.594	n/a	/n/a	+
1:12460238|12476880	1	12460238	12476880	21	7_5_2	26	0.618	n/a	/n/a	+
1:12475140|12476880	1	12475140	12476880	5	2_2_0	31	0.244	n/a	/n/a	+
1:12516054|12520451	1	12516054	12520451	5	1_2_1	37	0.213	n/a	/n/a	+
1:12638746|12639440	1	12638746	12639440	248	44_40_13	453	0.523	n/a	/n/a	-
1:12638746|12640694	1	12638746	12640694	20	4_8_0	721	0.053	n/a	/n/a	-
1:15370485|15370655	1	15370485	15370655	5	2_2_0	4	0.714	n/a	/n/a	+
1:15844605|15844890	1	15844605	15844890	10	3_4_0	106	0.159	n/a	/n/a	-
1:15860732|15874923	1	15860732	15874923	20	2_9_9	2	0.952	n/a	/n/a	+
1:15964802|15970145	1	15964802	15970145	10	3_3_2	5	0.8	n/a	/n/a	+
1:15970017|15976318	1	15970017	15976318	9	4_2_2	41	0.305	n/a	/n/a	+
1:15976215|15978390	1	15976215	15978390	3	1_2_1	19	0.24	n/a	/n/a	+
1:16044388|16047883	1	16044388	16047883	42	8_7_12	34	0.712	n/a	/n/a	+
1:16116601|16123438	1	16116601	16123438	14	5_1_2	50	0.359	n/a	/n/a	-
1:16119332|16123438	1	16119332	16123438	15	7_2_5	86	0.259	n/a	/n/a	-
1:16199311|16203173	1	16199311	16203173	2	2_1_0	11	0.267	n/a	/n/a	+
1:16235816|16242774	1	16235816	16242774	13	2_2_1	17	0.605	n/a	/n/a	+
1:16237596|16242774	1	16237596	16242774	6	2_2_1	19	0.387	n/a	/n/a	+
1:16237596|16248844	1	16237596	16248844	3	3_1_0	7	0.462	n/a	/n/a	+
1:16464348|16464925	1	16464348	16464925	7	5_5_0	70	0.167	n/a	/n/a	-
1:16474873|16475542	1	16474873	16475542	5	2_2_0	73	0.12	n/a	/n/a	-
1:16490966|16494748	1	16490966	16494748	8	3_2_2	5	0.762	n/a	/n/a	+
1:16528277|16529069	1	16528277	16529069	7	3_4_0	31	0.311	n/a	/n/a	-
1:16774365|16775696	1	16774365	16775696	3	1_2_1	45	0.118	n/a	/n/a	+
1:17349103|17350569	1	17349103	17350569	5	2_1_1	168	0.056	n/a	/n/a	-
1:17928622|17934472	1	17928622	17934472	4	1_2_1	21	0.276	n/a	/n/a	+
1:19483261|19486775	1	19483261	19486775	5	2_2_0	41	0.196	n/a	/n/a	-
1:19513034|19514034	1	19513034	19514034	8	1_1_1	73	0.18	n/a	/n/a	-
1:19518682|19519034	1	19518682	19519034	7	3_1_3	79	0.151	n/a	/n/a	-
1:19683129|19684057	1	19683129	19684057	9	3_4_0	109	0.142	n/a	/n/a	-
1:19683129|19712120	1	19683129	19712120	7	3_2_1	101	0.122	n/a	/n/a	-
1:19705034|19712120	1	19705034	19712120	14	5_5_1	131	0.176	n/a	/n/a	-
1:21071237|21076375	1	21071237	21076375	5	4_4_0	252	0.038	n/a	/n/a	-
1:21076216|21076375	1	21076216	21076375	4	2_2_0	262	0.03	n/a	/n/a	-
1:21076216|21076468	1	21076216	21076468	8	4_2_0	74	0.178	n/a	/n/a	-
1:21076216|21100103	1	21076216	21100103	92	26_24_2	161	0.533	n/a	/n/a	-
1:21083659|21100103	1	21083659	21100103	146	22_27_18	256	0.533	n/a	/n/a	-
1:21083659|21103243	1	21083659	21103243	16	2_4_2	252	0.113	n/a	/n/a	-
1:21091870|21100103	1	21091870	21100103	73	18_20_4	483	0.232	n/a	/n/a	-
1:21091870|21102498	1	21091870	21102498	2	1_2_0	403	0.01	n/a	/n/a	-
1:21091870|21106404	1	21091870	21106404	7	3_0_1	433	0.031	n/a	/n/a	-
1:21094077|21103243	1	21094077	21103243	4	1_1_1	440	0.018	n/a	/n/a	-
1:21097423|21100103	1	21097423	21100103	128	33_31_10	309	0.453	n/a	/n/a	-
1:21102217|21102498	1	21102217	21102498	93	24_17_1	41	0.819	n/a	/n/a	-
1:21137231|21139732	1	21137231	21139732	4	2_1_1	29	0.216	n/a	/n/a	-
1:21205816|21212864	1	21205816	21212864	9	1_4_0	22	0.45	n/a	/n/a	-
1:21220010|21221994	1	21220010	21221994	42	12_13_3	54	0.609	n/a	/n/a	-
1:21267984|21268823	1	21267984	21268823	4	1_1_1	47	0.145	n/a	/n/a	-
1:21267984|21307720	1	21267984	21307720	2	1_2_0	77	0.049	n/a	/n/a	-
1:21295967|21329301	1	21295967	21329301	5	2_2_0	54	0.156	n/a	/n/a	-
1:21327692|21329280	1	21327692	21329280	2	1_2_1	101	0.038	n/a	/n/a	-
1:21327692|21329301	1	21327692	21329301	88	25_18_10	74	0.704	n/a	/n/a	-
1:21373452|21377487	1	21373452	21377487	12	1_3_5	81	0.229	n/a	/n/a	-
1:21373452|21415706	1	21373452	21415706	4	3_0_4	144	0.053	n/a	/n/a	-
1:21377359|21415706	1	21377359	21415706	10	5_4_3	187	0.097	n/a	/n/a	-
1:21377359|21437876	1	21377359	21437876	29	7_0_12	86	0.403	n/a	/n/a	-
1:21386218|21415706	1	21386218	21415706	3	0_1_2	140	0.041	n/a	/n/a	-
1:21399956|21437876	1	21399956	21437876	8	4_0_5	37	0.302	n/a	/n/a	-
1:21415631|21416235	1	21415631	21416235	9	2_1_4	130	0.122	n/a	/n/a	-
1:21415631|21424870	1	21415631	21424870	7	2_3_2	145	0.088	n/a	/n/a	-
1:21415631|21437876	1	21415631	21437876	111	14_9_39	151	0.595	n/a	/n/a	-
1:21415631|21452672	1	21415631	21452672	2	2_2_0	139	0.028	n/a	/n/a	-
1:21415631|21464301	1	21415631	21464301	13	1_2_4	131	0.166	n/a	/n/a	-
1:21424708|21437876	1	21424708	21437876	4	2_1_2	51	0.136	n/a	/n/a	-
1:21431610|21437876	1	21431610	21437876	26	8_4_3	77	0.403	n/a	/n/a	-
1:21548240|21554534	1	21548240	21554534	11	3_2_2	155	0.124	n/a	/n/a	-
1:21599192|21616649	1	21599192	21616649	67	18_9_13	25	0.843	n/a	/n/a	-
1:22016467|22021714	1	22016467	22021714	8	2_2_0	108	0.129	n/a	/n/a	-
1:22047529|22048257	1	22047529	22048257	10	3_1_3	1	0.952	n/a	/n/a	-
1:22073560|22078108	1	22073560	22078108	5	2_1_1	23	0.303	n/a	/n/a	-
1:22073560|22079612	1	22073560	22079612	9	1_3_1	21	0.462	n/a	/n/a	-
1:22074631|22078108	1	22074631	22078108	18	9_6_1	24	0.6	n/a	/n/a	-
1:22074631|22079612	1	22074631	22079612	14	5_4_1	22	0.56	n/a	/n/a	-
1:22188250|22188608	1	22188250	22188608	5	1_3_1	332	0.029	n/a	/n/a	-
1:22404922|22413359	1	22404922	22413359	295	37_42_6	48	0.925	n/a	/n/a	+
1:22404922|22418167	1	22404922	22418167	3	3_3_0	65	0.085	n/a	/n/a	+
1:22417921|22515428	1	22417921	22515428	5	0_1_2	0	1	n/a	/n/a	+
1:22816373|22818026	1	22816373	22818026	3	2_1_0	0	1	n/a	/n/a	+
1:23356936|23377013	1	23356936	23377013	14	6_6_2	122	0.187	n/a	/n/a	+
1:23356962|23366927	1	23356962	23366927	33	7_8_2	150	0.306	n/a	/n/a	+
1:23356962|23370979	1	23356962	23370979	46	15_6_11	264	0.258	n/a	/n/a	+
1:23356962|23377013	1	23356962	23377013	633	68_63_26	166	0.884	n/a	/n/a	+
1:23356962|23380332	1	23356962	23380332	3	1_0_2	101	0.056	n/a	/n/a	+
1:23356962|23385660	1	23356962	23385660	17	5_5_2	74	0.315	n/a	/n/a	+
1:23356966|23377017	1	23356966	23377017	2	1_2_0	136	0.029	n/a	/n/a	+
1:23364878|23370979	1	23364878	23370979	2	1_0_2	220	0.018	n/a	/n/a	+
1:23366752|23370979	1	23366752	23370979	20	7_4_3	249	0.138	n/a	/n/a	+
1:23366752|23377013	1	23366752	23377013	6	3_3_0	160	0.07	n/a	/n/a	+
1:23376880|23385660	1	23376880	23385660	40	12_9_5	559	0.125	n/a	/n/a	+
1:23381562|23384058	1	23381562	23384058	6	3_2_1	118	0.092	n/a	/n/a	+
1:23397718|23398690	1	23397718	23398690	46	14_8_13	49	0.652	n/a	/n/a	+
1:23435515|23436143	1	23435515	23436143	5	2_0_3	18	0.357	n/a	/n/a	-
1:23777972|23782687	1	23777972	23782687	5	0_2_1	71	0.123	n/a	/n/a	-
1:24086002|24086303	1	24086002	24086303	7	1_2_1	70	0.167	n/a	/n/a	+
1:24130890|24147083	1	24130890	24147083	7	3_1_2	143	0.089	n/a	/n/a	-
1:24137226|24147083	1	24137226	24147083	4	0_1_2	59	0.119	n/a	/n/a	-
1:24140680|24147083	1	24140680	24147083	12	6_3_4	50	0.324	n/a	/n/a	-
1:24143165|24147083	1	24143165	24147083	17	10_5_6	94	0.266	n/a	/n/a	-
1:24766662|24771734	1	24766662	24771734	8	2_3_6	22	0.421	n/a	/n/a	+
1:24840804|24841057	1	24840804	24841057	6	4_4_0	1	0.923	n/a	/n/a	+
1:24857708|24859744	1	24857708	24859744	3	2_1_0	2	0.75	n/a	/n/a	+
1:25124233|25153607	1	25124233	25153607	12	2_3_2	65	0.27	n/a	/n/a	+
1:25568865|25570124	1	25568865	25570124	6	0_2_3	20	0.375	n/a	/n/a	-
1:25642429|25644762	1	25642429	25644762	2	1_1_1	11	0.267	n/a	/n/a	-
1:25644554|25644762	1	25644554	25644762	5	2_1_1	14	0.417	n/a	/n/a	-
1:25666965|25669564	1	25666965	25669564	8	2_2_1	43	0.271	n/a	/n/a	+
1:25666965|25671722	1	25666965	25671722	2	1_0_2	42	0.087	n/a	/n/a	+
1:25666965|25678184	1	25666965	25678184	14	3_3_4	33	0.459	n/a	/n/a	+
1:25666965|25683344	1	25666965	25683344	3	2_0_3	43	0.122	n/a	/n/a	+
1:25678117|25683344	1	25678117	25683344	8	1_0_2	45	0.262	n/a	/n/a	+
1:25773253|25783322	1	25773253	25783322	10	2_1_1	8	0.714	n/a	/n/a	+
1:25780750|25783322	1	25780750	25783322	3	1_2_0	4	0.6	n/a	/n/a	+
1:26314722|26317354	1	26314722	26317354	8	1_1_1	12	0.571	n/a	/n/a	-
1:26566253|26570809	1	26566253	26570809	5	2_2_1	24	0.294	n/a	/n/a	+
1:26581662|26582356	1	26581662	26582356	21	7_8_0	23	0.646	n/a	/n/a	+
1:26584088|26586293	1	26584088	26586293	87	24_23_7	16	0.916	n/a	/n/a	+
1:26594974|26596105	1	26594974	26596105	14	4_4_0	8	0.778	n/a	/n/a	+
1:26759382|26768863	1	26759382	26768863	2	2_0_1	15	0.211	n/a	/n/a	+
1:26759382|26774151	1	26759382	26774151	4	2_2_0	17	0.32	n/a	/n/a	+
1:26772807|26774151	1	26772807	26774151	15	4_3_4	36	0.455	n/a	/n/a	+
1:26772807|26786635	1	26772807	26786635	4	1_1_1	50	0.138	n/a	/n/a	+
1:26774050|26786635	1	26774050	26786635	4	3_3_2	95	0.078	n/a	/n/a	+
1:26783658|26789924	1	26783658	26789924	3	2_0_2	24	0.2	n/a	/n/a	-
1:27056142|27059283	1	27056142	27059283	6	4_3_1	30	0.286	n/a	/n/a	+
1:27223792|27224216	1	27223792	27224216	5	2_2_0	13	0.435	n/a	/n/a	-
1:27269151|27269556	1	27269151	27269556	13	1_5_0	12	0.684	n/a	/n/a	+
1:27432376|27436268	1	27432376	27436268	3	1_2_1	26	0.188	n/a	/n/a	-
1:28116073|28120143	1	28116073	28120143	22	5_9_5	21	0.677	n/a	/n/a	+
1:28233439|28233793	1	28233439	28233793	6	1_2_1	79	0.132	n/a	/n/a	-
1:28315046|28330930	1	28315046	28330930	3	1_0_2	10	0.375	n/a	/n/a	-
1:28323831|28330930	1	28323831	28330930	5	0_2_1	16	0.385	n/a	/n/a	-
1:28323831|28343750	1	28323831	28343750	3	0_1_2	15	0.286	n/a	/n/a	-
1:28337458|28343750	1	28337458	28343750	22	4_0_5	3	0.936	n/a	/n/a	-
1:28598185|28605752	1	28598185	28605752	4	2_2_0	399	0.02	n/a	/n/a	+
1:28601336|28605752	1	28601336	28605752	63	19_22_4	418	0.232	n/a	/n/a	+
1:28733921|28735550	1	28733921	28735550	5	0_2_2	7	0.588	n/a	/n/a	+
1:28733921|28735785	1	28733921	28735785	7	1_1_2	7	0.667	n/a	/n/a	+
1:28907072|28907741	1	28907072	28907741	3	1_2_2	44	0.12	n/a	/n/a	-
1:28939759|28948677	1	28939759	28948677	9	1_2_1	19	0.486	n/a	/n/a	-
1:28944465|28948677	1	28944465	28948677	3	1_3_2	32	0.158	n/a	/n/a	-
1:29313943|29314417	1	29313943	29314417	2	1_2_0	1	0.8	n/a	/n/a	+
1:29362338|29365938	1	29362338	29365938	24	5_7_3	15	0.762	n/a	/n/a	+
1:29424319|29438960	1	29424319	29438960	5	1_0_2	63	0.137	n/a	/n/a	+
1:29481208|29481422	1	29481208	29481422	132	36_28_6	68	0.795	n/a	/n/a	-
1:29585017|29587415	1	29585017	29587415	5	2_2_0	66	0.132	n/a	/n/a	+
1:29601960|29602268	1	29601960	29602268	7	2_1_0	45	0.237	n/a	/n/a	+
1:31413998|31414970	1	31413998	31414970	7	3_3_1	111	0.112	n/a	/n/a	-
1:31418193|31426828	1	31418193	31426828	6	2_2_0	80	0.13	n/a	/n/a	-
1:31447498|31454252	1	31447498	31454252	10	2_0_2	122	0.141	n/a	/n/a	-
1:31452909|31455487	1	31452909	31455487	10	2_2_4	79	0.202	n/a	/n/a	-
1:31465237|31468067	1	31465237	31468067	54	16_15_3	92	0.54	n/a	/n/a	-
1:31465237|31479949	1	31465237	31479949	5	4_3_0	103	0.088	n/a	/n/a	-
1:31478700|31479946	1	31478700	31479946	15	7_4_1	102	0.227	n/a	/n/a	-
1:31478700|31479949	1	31478700	31479949	169	45_33_15	96	0.779	n/a	/n/a	-
1:32373262|32384653	1	32373262	32384653	4	1_1_1	332	0.024	n/a	/n/a	-
1:32375639|32377427	1	32375639	32377427	4	1_2_0	15	0.348	n/a	/n/a	-
1:32381492|32385259	1	32381492	32385259	20	5_5_0	47	0.46	n/a	/n/a	-
1:32381496|32385259	1	32381496	32385259	238	27_46_11	47	0.91	n/a	/n/a	-
1:32384571|32385259	1	32384571	32385259	15	3_8_0	63	0.323	n/a	/n/a	-
1:32495899|32498935	1	32495899	32498935	8	3_3_1	296	0.051	n/a	/n/a	+
1:32495899|32510991	1	32495899	32510991	4	2_0_2	36	0.182	n/a	/n/a	+
1:32502511|32504220	1	32502511	32504220	43	12_3_12	328	0.208	n/a	/n/a	+
1:32502511|32505174	1	32502511	32505174	10	3_3_1	333	0.057	n/a	/n/a	+
1:32557276|32561363	1	32557276	32561363	3	2_0_1	26	0.188	n/a	/n/a	+
1:32557276|32566163	1	32557276	32566163	5	2_1_1	39	0.204	n/a	/n/a	+
1:32560385|32566163	1	32560385	32566163	7	2_3_1	30	0.318	n/a	/n/a	+
1:32628836|32632897	1	32628836	32632897	6	2_2_0	118	0.092	n/a	/n/a	+
1:32631706|32632897	1	32631706	32632897	3	2_2_0	109	0.052	n/a	/n/a	+
1:32650126|32653725	1	32650126	32653725	7	2_2_1	54	0.206	n/a	/n/a	+
1:32689635|32692131	1	32689635	32692131	2	0_1_2	347	0.011	n/a	/n/a	+
1:32691772|32692131	1	32691772	32692131	4	2_2_0	336	0.023	n/a	/n/a	+
1:32694100|32694809	1	32694100	32694809	4	2_1_1	250	0.031	n/a	/n/a	+
1:32790080|32793278	1	32790080	32793278	8	2_3_1	35	0.314	n/a	/n/a	+
1:32792540|32793278	1	32792540	32793278	15	3_4_2	48	0.385	n/a	/n/a	+
1:33058532|33059355	1	33058532	33059355	6	2_1_1	6	0.667	n/a	/n/a	+
1:33058532|33060824	1	33058532	33060824	3	1_2_0	7	0.462	n/a	/n/a	+
1:33097428|33099673	1	33097428	33099673	10	0_3_4	36	0.357	n/a	/n/a	-
1:33097428|33099711	1	33097428	33099711	16	2_5_2	21	0.604	n/a	/n/a	-
1:33099246|33099711	1	33099246	33099711	27	5_10_2	34	0.614	n/a	/n/a	-
1:33251963|33256855	1	33251963	33256855	4	0_1_2	276	0.028	n/a	/n/a	-
1:33263017|33263444	1	33263017	33263444	3	2_1_3	96	0.059	n/a	/n/a	-
1:33276192|33276658	1	33276192	33276658	9	4_3_0	284	0.06	n/a	/n/a	-
1:33311303|33318767	1	33311303	33318767	3	2_2_2	18	0.25	n/a	/n/a	+
1:33409620|33411229	1	33409620	33411229	4	2_1_0	10	0.444	n/a	/n/a	-
1:33413823|33415375	1	33413823	33415375	72	24_27_1	27	0.842	n/a	/n/a	-
1:33478808|33480195	1	33478808	33480195	9	3_3_0	27	0.4	n/a	/n/a	-
1:33745725|33746058	1	33745725	33746058	6	2_2_0	57	0.174	n/a	/n/a	+
1:33760538|33760906	1	33760538	33760906	34	9_13_5	62	0.523	n/a	/n/a	+
1:35559515|35561492	1	35559515	35561492	5	2_0_2	43	0.189	n/a	/n/a	+
1:35559515|35563167	1	35559515	35563167	5	2_2_0	44	0.185	n/a	/n/a	+
1:35561420|35570370	1	35561420	35570370	6	2_2_0	28	0.3	n/a	/n/a	+
1:35569896|35570370	1	35569896	35570370	9	2_4_1	14	0.562	n/a	/n/a	+
1:35656099|35657130	1	35656099	35657130	6	1_2_0	58	0.171	n/a	/n/a	-
1:35758627|35761589	1	35758627	35761589	7	2_1_2	12	0.538	n/a	/n/a	+
1:35824526|35827390	1	35824526	35827390	5	1_2_1	10	0.5	n/a	/n/a	+
1:35846860|35847359	1	35846860	35847359	5	2_1_0	22	0.312	n/a	/n/a	+
1:35846860|35854683	1	35846860	35854683	27	4_5_0	45	0.545	n/a	/n/a	+
1:35854511|35855699	1	35854511	35855699	10	4_3_0	40	0.333	n/a	/n/a	+
1:35870624|35871069	1	35870624	35871069	9	2_2_1	16	0.529	n/a	/n/a	+
1:35870624|35873760	1	35870624	35873760	5	2_3_0	14	0.417	n/a	/n/a	+
1:35873609|35881315	1	35873609	35881315	3	2_2_1	28	0.176	n/a	/n/a	+
1:35879573|35881315	1	35879573	35881315	75	16_24_8	26	0.852	n/a	/n/a	+
1:35881067|35881315	1	35881067	35881315	15	7_7_2	95	0.24	n/a	/n/a	+
1:35925906|35936561	1	35925906	35936561	10	2_2_1	7	0.741	n/a	/n/a	-
1:35936464|35944813	1	35936464	35944813	6	2_1_0	43	0.218	n/a	/n/a	-
1:35940406|35944813	1	35940406	35944813	4	2_1_1	39	0.17	n/a	/n/a	-
1:35944567|35944813	1	35944567	35944813	13	4_6_0	46	0.361	n/a	/n/a	-
1:36213508|36214205	1	36213508	36214205	21	6_9_1	15	0.737	n/a	/n/a	-
1:36282483|36288583	1	36282483	36288583	3	2_1_0	5	0.545	n/a	/n/a	+
1:36288463|36292436	1	36288463	36292436	2	2_2_0	13	0.235	n/a	/n/a	+
1:36411293|36439112	1	36411293	36439112	6	2_2_0	5	0.706	n/a	/n/a	+
1:36432556|36439112	1	36432556	36439112	25	4_8_4	7	0.877	n/a	/n/a	+
1:36501778|36506042	1	36501778	36506042	4	0_2_2	6	0.571	n/a	/n/a	+
1:36724495|36725085	1	36724495	36725085	3	2_2_0	38	0.136	n/a	/n/a	+
1:36814371|36823872	1	36814371	36823872	18	1_0_5	59	0.379	n/a	/n/a	-
1:36823840|36824423	1	36823840	36824423	11	2_1_1	50	0.306	n/a	/n/a	-
1:36823840|36828257	1	36823840	36828257	6	3_1_0	35	0.255	n/a	/n/a	-
1:36826822|36828257	1	36826822	36828257	21	6_1_7	39	0.519	n/a	/n/a	-
1:38047824|38049534	1	38047824	38049534	3	1_0_2	17	0.261	n/a	/n/a	-
1:38047824|38053096	1	38047824	38053096	6	1_0_2	42	0.222	n/a	/n/a	-
1:38052912|38054683	1	38052912	38054683	7	3_2_0	14	0.5	n/a	/n/a	-
1:38332131|38339760	1	38332131	38339760	22	4_6_3	35	0.557	n/a	/n/a	-
1:38338602|38339827	1	38338602	38339827	4	1_2_0	41	0.163	n/a	/n/a	-
1:38341278|38351497	1	38341278	38351497	6	1_2_0	44	0.214	n/a	/n/a	-
1:38449841|38450451	1	38449841	38450451	6	2_2_0	4	0.75	n/a	/n/a	-
1:39311611|39322652	1	39311611	39322652	3	2_2_0	48	0.111	n/a	/n/a	-
1:39512708|39513659	1	39512708	39513659	8	1_1_3	15	0.516	n/a	/n/a	+
1:39549035|39550110	1	39549035	39550110	8	0_1_2	0	1	n/a	/n/a	+
1:39696854|39723700	1	39696854	39723700	8	1_3_3	3	0.842	n/a	/n/a	+
1:39806174|39806625	1	39806174	39806625	6	1_2_1	1	0.923	n/a	/n/a	+
1:39904946|39905172	1	39904946	39905172	14	5_4_1	44	0.389	n/a	/n/a	+
1:40029286|40030445	1	40029286	40030445	2	2_1_0	121	0.032	n/a	/n/a	-
1:40315791|40318623	1	40315791	40318623	4	1_1_1	9	0.471	n/a	/n/a	-
1:40529899|40530231	1	40529899	40530231	11	4_4_2	22	0.5	n/a	/n/a	+
1:40654727|40656525	1	40654727	40656525	8	2_0_2	140	0.103	n/a	/n/a	+
1:40654727|40661436	1	40654727	40661436	9	2_2_0	182	0.09	n/a	/n/a	+
1:40654727|40668286	1	40654727	40668286	66	21_22_3	19	0.874	n/a	/n/a	+
1:40656444|40668286	1	40656444	40668286	37	7_13_5	87	0.46	n/a	/n/a	+
1:40688246|40697330	1	40688246	40697330	8	2_3_0	9	0.64	n/a	/n/a	+
1:40726511|40734207	1	40726511	40734207	7	3_3_0	85	0.141	n/a	/n/a	+
1:40733458|40737707	1	40733458	40737707	17	2_7_1	41	0.453	n/a	/n/a	+
1:40922617|40923111	1	40922617	40923111	5	2_1_1	2	0.833	n/a	/n/a	+
1:41463066|41466789	1	41463066	41466789	7	3_2_0	226	0.058	n/a	/n/a	+
1:41474466|41475261	1	41474466	41475261	66	22_25_14	267	0.331	n/a	/n/a	+
1:41474466|41475926	1	41474466	41475926	96	23_22_20	226	0.459	n/a	/n/a	+
1:41512079|41514562	1	41512079	41514562	8	4_2_0	26	0.381	n/a	/n/a	-
1:41536267|41541123	1	41536267	41541123	34	9_14_1	33	0.673	n/a	/n/a	-
1:41578955|41582682	1	41578955	41582682	11	5_1_4	86	0.204	n/a	/n/a	-
1:41578955|41608784	1	41578955	41608784	82	26_18_4	78	0.678	n/a	/n/a	-
1:41578955|41627104	1	41578955	41627104	12	4_1_2	66	0.267	n/a	/n/a	-
1:41608550|41617356	1	41608550	41617356	4	2_1_1	48	0.143	n/a	/n/a	-
1:41625397|41651922	1	41625397	41651922	2	2_1_0	31	0.114	n/a	/n/a	-
1:41651793|41660071	1	41651793	41660071	11	4_1_3	24	0.478	n/a	/n/a	-
1:42094420|42094618	1	42094420	42094618	9	5_4_1	11	0.621	n/a	/n/a	-
1:42312054|42314760	1	42312054	42314760	2	2_1_1	14	0.222	n/a	/n/a	-
1:42330249|42331286	1	42330249	42331286	4	1_2_0	15	0.348	n/a	/n/a	-
1:42660561|42693637	1	42660561	42693637	4	2_2_1	77	0.094	n/a	/n/a	-
1:42693554|42744343	1	42693554	42744343	29	5_6_5	365	0.137	n/a	/n/a	-
1:42693554|42776781	1	42693554	42776781	35	6_7_15	41	0.631	n/a	/n/a	-
1:42693554|42789498	1	42693554	42789498	6	2_4_1	15	0.444	n/a	/n/a	-
1:42730786|42731583	1	42730786	42731583	6	1_2_1	141	0.078	n/a	/n/a	-
1:42730786|42744343	1	42730786	42744343	219	23_54_32	474	0.48	n/a	/n/a	-
1:42730786|42744455	1	42730786	42744455	147	13_31_24	160	0.648	n/a	/n/a	-
1:42730786|42776781	1	42730786	42776781	79	8_1_34	168	0.485	n/a	/n/a	-
1:42730786|42789498	1	42730786	42789498	26	4_4_6	142	0.268	n/a	/n/a	-
1:42744019|42744343	1	42744019	42744343	28	7_5_3	535	0.095	n/a	/n/a	-
1:42744019|42744455	1	42744019	42744455	4	1_1_1	245	0.032	n/a	/n/a	-
1:42744019|42776781	1	42744019	42776781	16	6_1_5	253	0.112	n/a	/n/a	-
1:42744019|42789498	1	42744019	42789498	9	2_1_0	227	0.073	n/a	/n/a	-
1:42776721|42789498	1	42776721	42789498	2	2_2_0	87	0.044	n/a	/n/a	-
1:43130534|43133111	1	43130534	43133111	7	2_1_2	7	0.667	n/a	/n/a	+
1:43239234|43241150	1	43239234	43241150	62	8_13_6	14	0.899	n/a	/n/a	+
1:44003869|44019612	1	44003869	44019612	5	0_1_2	154	0.061	n/a	/n/a	+
1:44280563|44303983	1	44280563	44303983	7	0_2_3	63	0.182	n/a	/n/a	+
1:44360055|44365399	1	44360055	44365399	5	1_1_2	19	0.345	n/a	/n/a	+
1:44363907|44365399	1	44363907	44365399	9	1_2_2	27	0.4	n/a	/n/a	+
1:44474025|44474295	1	44474025	44474295	4	3_1_0	186	0.041	n/a	/n/a	-
1:44707587|44713710	1	44707587	44713710	3	2_2_0	421	0.014	n/a	/n/a	-
1:44713611|44717214	1	44713611	44717214	19	4_4_3	385	0.09	n/a	/n/a	-
1:44713611|44785416	1	44713611	44785416	18	3_3_5	929	0.037	n/a	/n/a	-
1:44713611|44804994	1	44713611	44804994	9	2_4_2	468	0.037	n/a	/n/a	-
1:44750507|44785416	1	44750507	44785416	101	9_19_19	874	0.188	n/a	/n/a	-
1:44750507|44804994	1	44750507	44804994	23	7_11_5	402	0.103	n/a	/n/a	-
1:44750507|44818597	1	44750507	44818597	7	1_2_3	352	0.038	n/a	/n/a	-
1:44773982|44785416	1	44773982	44785416	364	35_42_42	842	0.464	n/a	/n/a	-
1:44773982|44804994	1	44773982	44804994	89	12_26_10	387	0.315	n/a	/n/a	-
1:44773982|44818597	1	44773982	44818597	4	2_2_0	337	0.023	n/a	/n/a	-
1:44785300|44804994	1	44785300	44804994	26	10_9_1	841	0.058	n/a	/n/a	-
1:44785300|44818597	1	44785300	44818597	4	1_1_1	789	0.01	n/a	/n/a	-
1:44804717|44804994	1	44804717	44804994	30	10_11_2	488	0.109	n/a	/n/a	-
1:44877653|44878394	1	44877653	44878394	260	47_41_11	43	0.924	n/a	/n/a	+
1:44877653|44881895	1	44877653	44881895	6	4_3_0	25	0.324	n/a	/n/a	+
1:45216114|45219505	1	45216114	45219505	4	1_1_1	98	0.075	n/a	/n/a	+
1:45223228|45223812	1	45223228	45223812	87	16_19_26	94	0.649	n/a	/n/a	+
1:45340350|45345680	1	45340350	45345680	4	2_2_0	16	0.333	n/a	/n/a	-
1:45340350|45347411	1	45340350	45347411	9	5_5_0	21	0.462	n/a	/n/a	-
1:45516746|45524431	1	45516746	45524431	5	2_1_1	10	0.5	n/a	/n/a	-
1:45553553|45553909	1	45553553	45553909	29	11_11_0	6	0.906	n/a	/n/a	-
1:45887397|45923543	1	45887397	45923543	3	2_1_1	3	0.667	n/a	/n/a	-
1:45980545|45984726	1	45980545	45984726	6	2_2_0	2094	0.006	n/a	/n/a	-
1:46032241|46032692	1	46032241	46032692	33	12_12_2	346	0.16	n/a	/n/a	+
1:46067927|46070688	1	46067927	46070688	8	1_0_2	56	0.222	n/a	/n/a	+
1:46067927|46072263	1	46067927	46072263	4	2_2_0	50	0.138	n/a	/n/a	+
1:46096154|46106075	1	46096154	46106075	12	6_6_0	77	0.238	n/a	/n/a	-
1:46099161|46108171	1	46099161	46108171	16	6_3_2	120	0.211	n/a	/n/a	-
1:46105882|46108171	1	46105882	46108171	37	11_4_7	88	0.457	n/a	/n/a	-
1:46105882|46120991	1	46105882	46120991	7	3_3_0	86	0.14	n/a	/n/a	-
1:46108099|46124814	1	46108099	46124814	8	2_2_0	134	0.107	n/a	/n/a	-
1:46193303|46195441	1	46193303	46195441	17	6_6_0	22	0.607	n/a	/n/a	-
1:46290105|46295253	1	46290105	46295253	17	4_6_0	47	0.42	n/a	/n/a	+
1:46383011|46425149	1	46383011	46425149	3	2_0_2	27	0.182	n/a	/n/a	+
1:46531726|46546422	1	46531726	46546422	8	1_1_3	34	0.32	n/a	/n/a	-
1:46543187|46546422	1	46543187	46546422	40	10_10_12	39	0.672	n/a	/n/a	-
1:46775569|46775988	1	46775569	46775988	8	3_3_0	123	0.115	n/a	/n/a	+
1:46818540|46827368	1	46818540	46827368	7	2_2_0	26	0.35	n/a	/n/a	+
1:47098431|47101642	1	47098431	47101642	3	2_1_1	13	0.316	n/a	/n/a	-
1:47725961|47737913	1	47725961	47737913	6	2_2_0	13	0.48	n/a	/n/a	-
1:47745913|47748131	1	47745913	47748131	6	2_3_1	9	0.571	n/a	/n/a	-
1:47753223|47761520	1	47753223	47761520	13	2_1_6	25	0.51	n/a	/n/a	-
1:47753223|47765824	1	47753223	47765824	19	3_0_7	26	0.594	n/a	/n/a	-
1:47753223|47767420	1	47753223	47767420	5	2_2_0	28	0.263	n/a	/n/a	-
1:47755107|47765824	1	47755107	47765824	4	2_0_1	43	0.157	n/a	/n/a	-
1:47761437|47765824	1	47761437	47765824	3	1_1_2	53	0.102	n/a	/n/a	-
1:47761437|47767420	1	47761437	47767420	56	12_11_8	54	0.675	n/a	/n/a	-
1:47761437|47770668	1	47761437	47770668	5	1_3_2	55	0.154	n/a	/n/a	-
1:47767233|47770668	1	47767233	47770668	5	2_1_2	37	0.213	n/a	/n/a	-
1:47767233|47776034	1	47767233	47776034	11	3_2_1	26	0.458	n/a	/n/a	-
1:47834141|47838779	1	47834141	47838779	16	2_5_1	36	0.471	n/a	/n/a	+
1:47834141|47840965	1	47834141	47840965	7	3_2_3	17	0.452	n/a	/n/a	+
1:48821342|48825442	1	48821342	48825442	16	4_4_3	2	0.941	n/a	/n/a	-
1:48877136|48918803	1	48877136	48918803	6	1_1_1	3	0.8	n/a	/n/a	-
1:51001041|51032903	1	51001041	51032903	8	1_4_2	322	0.047	n/a	/n/a	-
1:51001041|51050483	1	51001041	51050483	6	2_2_2	344	0.034	n/a	/n/a	-
1:51001041|51061888	1	51001041	51061888	21	3_4_8	216	0.163	n/a	/n/a	-
1:51005264|51061888	1	51005264	51061888	36	12_5_9	237	0.233	n/a	/n/a	-
1:51032749|51050483	1	51032749	51050483	20	8_7_4	313	0.113	n/a	/n/a	-
1:51032749|51061888	1	51032749	51061888	131	26_20_12	185	0.586	n/a	/n/a	-
1:51048290|51050483	1	51048290	51050483	6	0_2_2	340	0.034	n/a	/n/a	-
1:51048290|51061888	1	51048290	51061888	11	4_6_3	234	0.086	n/a	/n/a	-
1:51121114|51171563	1	51121114	51171563	2	0_1_2	215	0.018	n/a	/n/a	-
1:51121114|51210447	1	51121114	51210447	18	5_4_8	150	0.194	n/a	/n/a	-
1:51171458|51210447	1	51171458	51210447	15	2_4_6	186	0.139	n/a	/n/a	-
1:51171458|51246716	1	51171458	51246716	10	1_3_1	96	0.172	n/a	/n/a	-
1:51171458|51267349	1	51171458	51267349	9	4_0_6	103	0.149	n/a	/n/a	-
1:51171458|51323669	1	51171458	51323669	6	1_1_1	86	0.122	n/a	/n/a	-
1:51199865|51210447	1	51199865	51210447	12	0_2_3	120	0.167	n/a	/n/a	-
1:51204535|51210447	1	51204535	51210447	11	2_0_5	252	0.08	n/a	/n/a	-
1:51204535|51218195	1	51204535	51218195	3	1_0_2	184	0.032	n/a	/n/a	-
1:51204535|51267349	1	51204535	51267349	17	4_1_6	193	0.15	n/a	/n/a	-
1:51204535|51323669	1	51204535	51323669	9	1_3_2	176	0.093	n/a	/n/a	-
1:51210356|51267349	1	51210356	51267349	8	0_3_3	199	0.074	n/a	/n/a	-
1:51253672|51267349	1	51253672	51267349	102	30_11_26	141	0.591	n/a	/n/a	-
1:51253672|51323669	1	51253672	51323669	31	10_6_7	130	0.323	n/a	/n/a	-
1:51317874|51323669	1	51317874	51323669	6	1_0_3	11	0.522	n/a	/n/a	-
1:51320014|51323669	1	51320014	51323669	13	2_1_4	18	0.591	n/a	/n/a	-
1:51578136|51584473	1	51578136	51584473	8	1_1_1	0	1	n/a	/n/a	+
1:51702406|51735797	1	51702406	51735797	8	2_3_0	65	0.198	n/a	/n/a	+
1:51702406|51737145	1	51702406	51737145	13	4_6_1	56	0.317	n/a	/n/a	+
1:51735628|51737145	1	51735628	51737145	8	2_2_0	90	0.151	n/a	/n/a	+
1:51868107|51874004	1	51868107	51874004	181	28_43_22	39	0.903	n/a	/n/a	-
1:51871577|51874004	1	51871577	51874004	3	2_2_0	88	0.064	n/a	/n/a	-
1:51887458|51913807	1	51887458	51913807	17	2_3_3	17	0.667	n/a	/n/a	-
1:51906019|51913807	1	51906019	51913807	9	4_3_1	31	0.367	n/a	/n/a	-
1:51926763|51929470	1	51926763	51929470	5	1_2_2	57	0.149	n/a	/n/a	-
1:51926763|51930998	1	51926763	51930998	87	4_6_26	54	0.763	n/a	/n/a	-
1:51926763|51946986	1	51926763	51946986	6	0_1_2	38	0.24	n/a	/n/a	-
1:52211208|52231653	1	52211208	52231653	42	11_13_5	105	0.444	n/a	/n/a	+
1:52214041|52231653	1	52214041	52231653	13	0_2_3	64	0.289	n/a	/n/a	+
1:52214041|52237854	1	52214041	52237854	2	0_1_2	49	0.075	n/a	/n/a	+
1:52215817|52227643	1	52215817	52227643	14	1_5_5	82	0.255	n/a	/n/a	+
1:52215817|52231653	1	52215817	52231653	13	0_5_3	108	0.194	n/a	/n/a	+
1:52237742|52238395	1	52237742	52238395	15	6_6_2	72	0.294	n/a	/n/a	+
1:52279707|52299842	1	52279707	52299842	4	1_3_2	45	0.151	n/a	/n/a	-
1:52283738|52299842	1	52283738	52299842	8	0_2_1	46	0.258	n/a	/n/a	-
1:52289336|52293541	1	52289336	52293541	8	1_1_2	106	0.131	n/a	/n/a	-
1:52289336|52299842	1	52289336	52299842	42	10_12_0	80	0.512	n/a	/n/a	-
1:52293468|52299842	1	52293468	52299842	73	8_18_15	81	0.643	n/a	/n/a	-
1:52299689|52302110	1	52299689	52302110	4	3_2_1	78	0.093	n/a	/n/a	-
1:52729445|52747488	1	52729445	52747488	7	3_4_1	18	0.438	n/a	/n/a	+
1:52924008|52927441	1	52924008	52927441	6	2_1_2	29	0.293	n/a	/n/a	-
1:52924008|52933939	1	52924008	52933939	3	1_1_1	15	0.286	n/a	/n/a	-
1:52930742|52933939	1	52930742	52933939	14	0_3_5	26	0.519	n/a	/n/a	-
1:52947476|52975384	1	52947476	52975384	8	2_2_1	68	0.19	n/a	/n/a	-
1:52954581|52962855	1	52954581	52962855	14	5_4_2	273	0.093	n/a	/n/a	-
1:52954581|52975384	1	52954581	52975384	4	2_2_1	69	0.104	n/a	/n/a	-
1:52956404|52975384	1	52956404	52975384	24	4_6_8	72	0.4	n/a	/n/a	-
1:52959283|52962855	1	52959283	52962855	14	3_7_6	344	0.075	n/a	/n/a	-
1:52959283|52975384	1	52959283	52975384	942	21_60_93	145	0.929	n/a	/n/a	-
1:52959283|52981726	1	52959283	52981726	10	1_5_4	100	0.167	n/a	/n/a	-
1:52961099|52975384	1	52961099	52975384	5	1_4_2	322	0.03	n/a	/n/a	-
1:53245525|53262456	1	53245525	53262456	5	1_0_3	12	0.455	n/a	/n/a	+
1:53320137|53326543	1	53320137	53326543	4	1_3_1	41	0.163	n/a	/n/a	+
1:53326403|53333449	1	53326403	53333449	10	5_2_3	44	0.312	n/a	/n/a	+
1:53326403|53343515	1	53326403	53343515	6	2_4_0	52	0.188	n/a	/n/a	+
1:53326403|53352725	1	53326403	53352725	4	2_2_0	108	0.069	n/a	/n/a	+
1:53329653|53347337	1	53329653	53347337	4	2_1_0	59	0.119	n/a	/n/a	+
1:53332175|53333449	1	53332175	53333449	4	1_1_2	80	0.091	n/a	/n/a	+
1:53343354|53347337	1	53343354	53347337	11	5_5_1	58	0.275	n/a	/n/a	+
1:53343354|53358647	1	53343354	53358647	25	10_8_0	33	0.602	n/a	/n/a	+
1:53351505|53358647	1	53351505	53358647	28	1_5_5	51	0.523	n/a	/n/a	+
1:53352628|53358647	1	53352628	53358647	8	1_2_1	63	0.203	n/a	/n/a	+
1:53407468|53427301	1	53407468	53427301	13	3_5_4	33	0.441	n/a	/n/a	+
1:53413681|53427301	1	53413681	53427301	2	0_2_1	27	0.129	n/a	/n/a	+
1:53440441|53446215	1	53440441	53446215	5	1_2_1	32	0.238	n/a	/n/a	+
1:53440441|53453808	1	53440441	53453808	9	1_2_1	27	0.4	n/a	/n/a	+
1:53443889|53446215	1	53443889	53446215	3	2_2_0	23	0.207	n/a	/n/a	+
1:53459075|53459374	1	53459075	53459374	93	12_14_5	131	0.587	n/a	/n/a	-
1:53493641|53504718	1	53493641	53504718	8	0_3_3	108	0.129	n/a	/n/a	+
1:54238002|54254869	1	54238002	54254869	9	3_0_3	27	0.4	n/a	/n/a	-
1:54252831|54262817	1	54252831	54262817	5	3_3_0	53	0.159	n/a	/n/a	-
1:54252831|54301293	1	54252831	54301293	12	2_3_0	21	0.533	n/a	/n/a	-
1:54254806|54262817	1	54254806	54262817	13	3_4_4	65	0.286	n/a	/n/a	-
1:54258902|54262817	1	54258902	54262817	8	1_5_2	50	0.242	n/a	/n/a	-
1:54262362|54266521	1	54262362	54266521	3	2_2_0	73	0.076	n/a	/n/a	-
1:54266366|54269682	1	54266366	54269682	3	2_0_1	76	0.073	n/a	/n/a	-
1:54266366|54298264	1	54266366	54298264	10	4_3_0	65	0.235	n/a	/n/a	-
1:54269601|54298264	1	54269601	54298264	5	2_1_1	63	0.137	n/a	/n/a	-
1:54272098|54298264	1	54272098	54298264	4	2_0_2	40	0.167	n/a	/n/a	-
1:54284644|54293846	1	54284644	54293846	5	2_2_0	74	0.119	n/a	/n/a	-
1:54284644|54298264	1	54284644	54298264	15	1_2_4	36	0.455	n/a	/n/a	-
1:54291471|54301293	1	54291471	54301293	6	1_0_3	14	0.462	n/a	/n/a	-
1:54348616|54348949	1	54348616	54348949	13	1_2_1	4	0.867	n/a	/n/a	-
1:54502283|54509198	1	54502283	54509198	3	1_2_0	147	0.039	n/a	/n/a	-
1:54506429|54509198	1	54506429	54509198	11	2_3_3	215	0.093	n/a	/n/a	-
1:54506429|54513045	1	54506429	54513045	5	2_3_1	146	0.064	n/a	/n/a	-
1:54670691|54675804	1	54670691	54675804	10	5_5_0	423	0.045	n/a	/n/a	+
1:55340766|55341720	1	55340766	55341720	5	1_1_1	132	0.07	n/a	/n/a	-
1:55637229|55643805	1	55637229	55643805	32	7_7_0	19	0.771	n/a	/n/a	-
1:56977648|57002784	1	56977648	57002784	7	1_2_1	1	0.933	n/a	/n/a	-
1:57140054|57159525	1	57140054	57159525	5	2_0_1	4	0.714	n/a	/n/a	+
1:57140054|57161832	1	57140054	57161832	2	2_1_0	6	0.4	n/a	/n/a	+
1:57157067|57161832	1	57157067	57161832	5	0_1_2	12	0.455	n/a	/n/a	+
1:58971732|59000003	1	58971732	59000003	8	3_3_0	87	0.155	n/a	/n/a	-
1:58971732|59002413	1	58971732	59002413	86	20_18_1	47	0.785	n/a	/n/a	-
1:58992933|59002413	1	58992933	59002413	7	0_1_2	74	0.159	n/a	/n/a	-
1:59787208|59812070	1	59787208	59812070	6	4_3_0	13	0.48	n/a	/n/a	+
1:59805630|59812070	1	59805630	59812070	45	4_10_4	25	0.783	n/a	/n/a	+
1:59805630|59844509	1	59805630	59844509	12	5_1_6	20	0.545	n/a	/n/a	+
1:61553821|61554352	1	61553821	61554352	4	2_1_1	59	0.119	n/a	/n/a	+
1:61553821|61743257	1	61553821	61743257	12	5_1_5	57	0.296	n/a	/n/a	+
1:61577043|61603350	1	61577043	61603350	2	0_1_2	14	0.222	n/a	/n/a	+
1:61577043|61624827	1	61577043	61624827	16	1_3_4	17	0.653	n/a	/n/a	+
1:61624547|61624827	1	61624547	61624827	2	2_2_0	9	0.308	n/a	/n/a	+
1:61743192|61818239	1	61743192	61818239	5	0_1_2	212	0.045	n/a	/n/a	+
1:61743192|61824946	1	61743192	61824946	77	12_22_18	93	0.623	n/a	/n/a	+
1:61743192|61849037	1	61743192	61849037	15	4_5_1	49	0.38	n/a	/n/a	+
1:61798184|61824946	1	61798184	61824946	25	2_11_13	118	0.298	n/a	/n/a	+
1:62149089|62175109	1	62149089	62175109	3	2_1_0	7	0.462	n/a	/n/a	-
1:62160369|62175109	1	62160369	62175109	8	1_3_5	17	0.485	n/a	/n/a	-
1:62166606|62189444	1	62166606	62189444	6	0_1_3	24	0.333	n/a	/n/a	-
1:62228530|62241006	1	62228530	62241006	7	1_2_2	21	0.4	n/a	/n/a	+
1:62234955|62241006	1	62234955	62241006	3	2_2_0	40	0.13	n/a	/n/a	+
1:62257020|62263100	1	62257020	62263100	8	3_3_0	24	0.4	n/a	/n/a	+
1:62261139|62263100	1	62261139	62263100	5	0_1_3	17	0.37	n/a	/n/a	+
1:62262959|62274202	1	62262959	62274202	6	2_1_0	11	0.522	n/a	/n/a	+
1:62321702|62330305	1	62321702	62330305	6	2_2_0	7	0.632	n/a	/n/a	+
1:62374044|62380336	1	62374044	62380336	8	1_2_2	13	0.552	n/a	/n/a	+
1:62455840|62483619	1	62455840	62483619	7	1_1_1	33	0.298	n/a	/n/a	+
1:62455840|62503721	1	62455840	62503721	7	3_0_1	31	0.311	n/a	/n/a	+
1:62472938|62483619	1	62472938	62483619	5	2_1_0	27	0.27	n/a	/n/a	+
1:62479015|62483619	1	62479015	62483619	3	1_2_1	29	0.171	n/a	/n/a	+
1:62479015|62503721	1	62479015	62503721	8	3_1_3	28	0.364	n/a	/n/a	+
1:62479015|62516730	1	62479015	62516730	8	4_1_1	30	0.348	n/a	/n/a	+
1:62713144|62717142	1	62713144	62717142	4	2_1_1	12	0.4	n/a	/n/a	-
1:62907159|62907970	1	62907159	62907970	7	2_2_1	23	0.378	n/a	/n/a	+
1:62908830|62913182	1	62908830	62913182	5	1_1_1	57	0.149	n/a	/n/a	+
1:63042933|63052295	1	63042933	63052295	29	5_8_10	19	0.753	n/a	/n/a	-
1:63042933|63091072	1	63042933	63091072	11	2_4_2	17	0.564	n/a	/n/a	-
1:63084377|63091072	1	63084377	63091072	5	2_1_1	14	0.417	n/a	/n/a	-
1:63119396|63128801	1	63119396	63128801	9	1_1_2	0	1	n/a	/n/a	-
1:63269390|63270926	1	63269390	63270926	12	3_4_2	5	0.828	n/a	/n/a	+
1:63269390|63276257	1	63269390	63276257	3	2_2_0	5	0.545	n/a	/n/a	+
1:63877597|63885111	1	63877597	63885111	2	2_1_0	3	0.571	n/a	/n/a	+
1:63919589|63920639	1	63919589	63920639	5	0_2_3	42	0.192	n/a	/n/a	-
1:63944435|63955889	1	63944435	63955889	36	3_9_11	67	0.518	n/a	/n/a	-
1:63944435|63974241	1	63944435	63974241	16	3_0_6	49	0.395	n/a	/n/a	-
1:63944435|63994857	1	63944435	63994857	7	1_0_2	33	0.298	n/a	/n/a	-
1:64474977|64516388	1	64474977	64516388	9	1_0_4	12	0.6	n/a	/n/a	+
1:64515363|64516388	1	64515363	64516388	5	2_0_2	26	0.278	n/a	/n/a	+
1:65234339|65255197	1	65234339	65255197	9	1_3_1	18	0.5	n/a	/n/a	+
1:65243306|65243775	1	65243306	65243775	3	3_3_0	29	0.171	n/a	/n/a	+
1:65243306|65255197	1	65243306	65255197	16	6_8_2	24	0.571	n/a	/n/a	+
1:65268659|65280523	1	65268659	65280523	6	4_4_0	17	0.414	n/a	/n/a	+
1:65278421|65280523	1	65278421	65280523	18	4_5_3	26	0.581	n/a	/n/a	+
1:65344708|65352024	1	65344708	65352024	7	2_0_1	68	0.171	n/a	/n/a	-
1:65811294|65831879	1	65811294	65831879	16	5_7_1	35	0.478	n/a	/n/a	+
1:65830318|65831879	1	65830318	65831879	618	82_77_37	67	0.949	n/a	/n/a	+
1:65830318|65845207	1	65830318	65845207	6	2_2_0	55	0.179	n/a	/n/a	+
1:67356837|67371058	1	67356837	67371058	24	6_7_4	5	0.906	n/a	/n/a	-
1:67423742|67428843	1	67423742	67428843	4	2_1_2	4	0.667	n/a	/n/a	+
1:67424534|67428843	1	67424534	67428843	5	2_1_0	6	0.625	n/a	/n/a	+
1:67864288|67865589	1	67864288	67865589	9	1_1_3	38	0.321	n/a	/n/a	-
1:67864288|67868100	1	67864288	67868100	4	2_2_1	16	0.333	n/a	/n/a	-
1:68610252|68624930	1	68610252	68624930	4	2_2_1	126	0.06	n/a	/n/a	-
1:68656996|68659910	1	68656996	68659910	2	1_2_0	45	0.082	n/a	/n/a	-
1:68942517|68944960	1	68942517	68944960	4	1_3_0	4	0.667	n/a	/n/a	-
1:68960113|68960378	1	68960113	68960378	2	2_2_0	2	0.667	n/a	/n/a	-
1:70650468|70654956	1	70650468	70654956	21	9_9_1	12	0.778	n/a	/n/a	-
1:70694105|70703235	1	70694105	70703235	6	2_2_0	45	0.211	n/a	/n/a	+
1:70758071|70766591	1	70758071	70766591	22	7_8_1	91	0.326	n/a	/n/a	-
1:70758071|70771973	1	70758071	70771973	21	7_6_4	109	0.278	n/a	/n/a	-
1:70758071|70779473	1	70758071	70779473	2	2_0_1	95	0.04	n/a	/n/a	-
1:70758071|70781249	1	70758071	70781249	71	18_13_8	24	0.855	n/a	/n/a	-
1:70758071|70790640	1	70758071	70790640	7	2_2_0	29	0.326	n/a	/n/a	-
1:70761813|70771973	1	70761813	70771973	13	4_5_2	178	0.127	n/a	/n/a	-
1:70766447|70781249	1	70766447	70781249	40	9_4_11	154	0.342	n/a	/n/a	-
1:70771907|70790640	1	70771907	70790640	4	1_0_2	106	0.07	n/a	/n/a	-
1:70790536|70801782	1	70790536	70801782	8	2_0_3	10	0.615	n/a	/n/a	-
1:70881639|70887358	1	70881639	70887358	3	0_1_2	43	0.122	n/a	/n/a	+
1:70881639|70890099	1	70881639	70890099	4	1_2_1	31	0.205	n/a	/n/a	+
1:70883620|70890099	1	70883620	70890099	6	2_2_0	45	0.211	n/a	/n/a	+
1:71530756|71535045	1	71530756	71535045	5	0_1_2	31	0.244	n/a	/n/a	-
1:72999447|73023669	1	72999447	73023669	6	1_2_1	0	1	n/a	/n/a	+
1:73020894|73023669	1	73020894	73023669	3	2_2_0	0	1	n/a	/n/a	+
1:76198329|76199313	1	76198329	76199313	7	1_1_3	12	0.538	n/a	/n/a	+
1:76205665|76216231	1	76205665	76216231	3	1_2_0	3	0.667	n/a	/n/a	+
1:76215104|76216231	1	76215104	76216231	4	1_0_2	13	0.381	n/a	/n/a	+
1:76253182|76255041	1	76253182	76255041	17	2_6_4	64	0.347	n/a	/n/a	+
1:77660563|77660964	1	77660563	77660964	7	2_1_0	16	0.467	n/a	/n/a	-
1:77672325|77676174	1	77672325	77676174	5	1_1_3	40	0.2	n/a	/n/a	-
1:77672325|77678032	1	77672325	77678032	39	8_2_17	13	0.857	n/a	/n/a	-
1:78098800|78107340	1	78098800	78107340	63	17_12_0	33	0.792	n/a	/n/a	-
1:78105134|78107340	1	78105134	78107340	6	2_0_1	36	0.25	n/a	/n/a	-
1:78107069|78107340	1	78107069	78107340	4	0_1_2	36	0.182	n/a	/n/a	-
1:78177432|78181553	1	78177432	78181553	16	3_4_1	30	0.516	n/a	/n/a	-
1:78178885|78180468	1	78178885	78180468	5	0_3_3	28	0.263	n/a	/n/a	-
1:78181427|78184326	1	78181427	78184326	4	2_0_2	51	0.136	n/a	/n/a	-
1:78183552|78184326	1	78183552	78184326	17	11_0_12	50	0.405	n/a	/n/a	-
1:78183552|78191447	1	78183552	78191447	57	16_19_3	25	0.82	n/a	/n/a	-
1:78267016|78272786	1	78267016	78272786	12	4_2_0	37	0.393	n/a	/n/a	+
1:78267016|78280916	1	78267016	78280916	5	2_2_0	23	0.303	n/a	/n/a	+
1:78268955|78272786	1	78268955	78272786	11	5_4_1	31	0.415	n/a	/n/a	+
1:78268955|78280916	1	78268955	78280916	5	2_2_1	19	0.345	n/a	/n/a	+
1:78279419|78309092	1	78279419	78309092	5	2_1_1	31	0.244	n/a	/n/a	+
1:78324623|78327007	1	78324623	78327007	20	5_4_3	95	0.296	n/a	/n/a	+
1:78324623|78329713	1	78324623	78329713	29	4_9_4	26	0.69	n/a	/n/a	+
1:78324623|78332076	1	78324623	78332076	68	16_4_21	11	0.925	n/a	/n/a	+
1:78338689|78340796	1	78338689	78340796	13	4_4_1	6	0.812	n/a	/n/a	+
1:78420940|78422385	1	78420940	78422385	5	1_1_1	49	0.169	n/a	/n/a	-
1:78478735|78479303	1	78478735	78479303	7	3_3_0	11	0.56	n/a	/n/a	+
1:84394819|84408362	1	84394819	84408362	5	2_1_1	1	0.909	n/a	/n/a	-
1:84644860|84650865	1	84644860	84650865	23	4_5_10	45	0.505	n/a	/n/a	+
1:84644860|84663507	1	84644860	84663507	6	1_1_2	51	0.19	n/a	/n/a	+
1:84644860|84680000	1	84644860	84680000	22	1_6_5	18	0.71	n/a	/n/a	+
1:85028940|85036403	1	85028940	85036403	9	3_2_0	15	0.545	n/a	/n/a	-
1:85655740|85656435	1	85655740	85656435	4	2_2_0	3	0.727	n/a	/n/a	-
1:85816098|85817262	1	85816098	85817262	8	3_1_3	47	0.254	n/a	/n/a	-
1:85816098|85824530	1	85816098	85824530	128	24_15_22	43	0.856	n/a	/n/a	-
1:86142919|86146587	1	86142919	86146587	13	5_2_6	1	0.963	n/a	/n/a	-
1:86241357|86252144	1	86241357	86252144	5	0_1_2	0	1	n/a	/n/a	-
1:86848614|86851273	1	86848614	86851273	6	0_1_2	7	0.632	n/a	/n/a	-
1:87181407|87185318	1	87181407	87185318	14	5_4_1	10	0.737	n/a	/n/a	+
1:87346345|87369131	1	87346345	87369131	5	0_2_2	79	0.112	n/a	/n/a	-
1:87380734|87549962	1	87380734	87549962	4	1_1_1	15	0.348	n/a	/n/a	+
1:87538617|87563618	1	87538617	87563618	4	1_1_2	20	0.286	n/a	/n/a	+
1:89236035|89237562	1	89236035	89237562	3	2_2_0	39	0.133	n/a	/n/a	+
1:89236035|89251896	1	89236035	89251896	11	4_3_3	20	0.524	n/a	/n/a	+
1:89250322|89251896	1	89250322	89251896	32	10_8_5	57	0.529	n/a	/n/a	+
1:89272996|89287686	1	89272996	89287686	7	2_1_1	29	0.326	n/a	/n/a	+
1:89401782|89418074	1	89401782	89418074	2	2_2_0	2	0.667	n/a	/n/a	-
1:90309197|90312217	1	90309197	90312217	6	3_3_0	7	0.632	n/a	/n/a	+
1:91356594|91383711	1	91356594	91383711	26	1_8_8	39	0.571	n/a	/n/a	-
1:91382197|91383711	1	91382197	91383711	394	56_35_31	54	0.936	n/a	/n/a	-
1:91382197|91385863	1	91382197	91385863	2	2_1_1	29	0.121	n/a	/n/a	-
1:92161229|92178099	1	92161229	92178099	8	1_1_2	33	0.327	n/a	/n/a	-
1:92327028|92327201	1	92327028	92327201	6	2_2_1	26	0.316	n/a	/n/a	-
1:92511089|92518215	1	92511089	92518215	4	1_2_0	2	0.8	n/a	/n/a	+
1:92554255|92613343	1	92554255	92613343	3	1_1_1	0	1	n/a	/n/a	+
1:92712619|92730195	1	92712619	92730195	6	2_1_1	8	0.6	n/a	/n/a	-
1:92752047|92757094	1	92752047	92757094	10	0_2_4	25	0.444	n/a	/n/a	-
1:92786156|92811471	1	92786156	92811471	9	1_1_5	208	0.08	n/a	/n/a	+
1:92798948|92811471	1	92798948	92811471	56	7_10_23	280	0.286	n/a	/n/a	+
1:92798948|92829327	1	92798948	92829327	57	11_4_21	116	0.496	n/a	/n/a	+
1:92798948|92846430	1	92798948	92846430	532	32_69_52	138	0.885	n/a	/n/a	+
1:92798973|92811471	1	92798973	92811471	5	0_2_2	330	0.029	n/a	/n/a	+
1:92798973|92846430	1	92798973	92846430	24	1_7_5	195	0.198	n/a	/n/a	+
1:93029199|93073284	1	93029199	93073284	11	1_1_2	2	0.917	n/a	/n/a	-
1:93070864|93073284	1	93070864	93073284	20	2_6_4	2	0.952	n/a	/n/a	-
1:93159359|93170301	1	93159359	93170301	9	2_1_1	17	0.514	n/a	/n/a	-
1:93201955|93202184	1	93201955	93202184	2	2_1_0	10	0.286	n/a	/n/a	-
1:93201955|93211359	1	93201955	93211359	9	3_3_0	6	0.75	n/a	/n/a	-
1:93301747|93303190	1	93301747	93303190	15	3_4_1	40	0.429	n/a	/n/a	+
1:93575787|93580645	1	93575787	93580645	5	2_1_0	70	0.125	n/a	/n/a	+
1:93576102|93580645	1	93576102	93580645	3	0_1_2	80	0.07	n/a	/n/a	+
1:93620213|93625783	1	93620213	93625783	6	4_2_1	15	0.444	n/a	/n/a	-
1:93621857|93625783	1	93621857	93625783	7	2_1_2	18	0.438	n/a	/n/a	-
1:93704867|93705453	1	93704867	93705453	7	2_2_0	0	1	n/a	/n/a	+
1:93770945|93777165	1	93770945	93777165	3	2_2_0	8	0.429	n/a	/n/a	-
1:93804713|93805236	1	93804713	93805236	2	1_0_2	21	0.16	n/a	/n/a	-
1:93804914|93805289	1	93804914	93805289	2	1_2_0	13	0.235	n/a	/n/a	-
1:93804914|93806067	1	93804914	93806067	7	1_0_2	16	0.467	n/a	/n/a	-
1:93826050|93834939	1	93826050	93834939	6	2_2_0	23	0.343	n/a	/n/a	+
1:93883367|93903211	1	93883367	93903211	6	2_4_1	0	1	n/a	/n/a	+
1:94032836|94033408	1	94032836	94033408	349	52_34_32	81	0.896	n/a	/n/a	-
1:94037227|94037398	1	94037227	94037398	3	1_1_2	75	0.074	n/a	/n/a	-
1:94037227|94041686	1	94037227	94041686	10	5_1_2	94	0.175	n/a	/n/a	-
1:94047858|94049678	1	94047858	94049678	5	3_2_1	118	0.078	n/a	/n/a	-
1:94107860|94140497	1	94107860	94140497	244	7_49_46	102	0.827	n/a	/n/a	-
1:94107860|94145805	1	94107860	94145805	3	0_1_2	59	0.092	n/a	/n/a	-
1:94107860|94171698	1	94107860	94171698	3	1_1_1	57	0.095	n/a	/n/a	-
1:94140170|94140497	1	94140170	94140497	64	21_22_2	121	0.514	n/a	/n/a	-
1:94360170|94363454	1	94360170	94363454	57	14_7_20	125	0.477	n/a	/n/a	-
1:94360170|94367225	1	94360170	94367225	98	19_12_19	41	0.827	n/a	/n/a	-
1:94362174|94370144	1	94362174	94370144	5	1_0_3	197	0.048	n/a	/n/a	-
1:94685814|94697199	1	94685814	94697199	81	20_26_5	15	0.915	n/a	/n/a	-
1:94921289|94933563	1	94921289	94933563	3	1_1_2	33	0.154	n/a	/n/a	+
1:94921289|94941293	1	94921289	94941293	4	1_2_2	57	0.123	n/a	/n/a	+
1:94924163|94941293	1	94924163	94941293	8	1_3_3	59	0.213	n/a	/n/a	+
1:94924163|94946162	1	94924163	94946162	18	0_7_6	28	0.562	n/a	/n/a	+
1:94953098|94956803	1	94953098	94956803	83	6_10_31	31	0.843	n/a	/n/a	+
1:94964158|94965170	1	94964158	94965170	4	1_1_1	14	0.364	n/a	/n/a	+
1:95586611|95639445	1	95586611	95639445	2	2_1_0	19	0.174	n/a	/n/a	+
1:95603831|95616975	1	95603831	95616975	12	2_1_4	74	0.245	n/a	/n/a	+
1:95603831|95639445	1	95603831	95639445	37	7_1_8	12	0.86	n/a	/n/a	+
1:95609447|95616975	1	95609447	95616975	88	21_10_15	97	0.645	n/a	/n/a	+
1:95609447|95639445	1	95609447	95639445	71	16_3_15	38	0.789	n/a	/n/a	+
1:95609447|95696550	1	95609447	95696550	16	2_0_4	30	0.516	n/a	/n/a	+
1:97216981|97250810	1	97216981	97250810	5	1_1_1	8	0.556	n/a	/n/a	+
1:97235259|97236407	1	97235259	97236407	24	10_10_1	13	0.787	n/a	/n/a	+
1:97235259|97250810	1	97235259	97250810	6	3_3_2	6	0.667	n/a	/n/a	+
1:97243141|97250810	1	97243141	97250810	9	1_1_1	17	0.514	n/a	/n/a	+
1:97981282|98015300	1	97981282	98015300	28	8_8_0	11	0.836	n/a	/n/a	-
1:98015116|98039526	1	98015116	98039526	6	4_2_1	25	0.324	n/a	/n/a	-
1:98015116|98060722	1	98015116	98060722	7	3_2_0	28	0.333	n/a	/n/a	-
1:98144651|98165103	1	98144651	98165103	7	0_3_3	20	0.412	n/a	/n/a	-
1:98144651|98187227	1	98144651	98187227	3	1_2_0	19	0.24	n/a	/n/a	-
1:100459093|100464971	1	100459093	100464971	73	13_16_10	14	0.912	n/a	/n/a	+
1:100472590|100483371	1	100472590	100483371	13	2_2_2	6	0.812	n/a	/n/a	+
1:100476921|100483371	1	100476921	100483371	7	3_1_0	20	0.412	n/a	/n/a	+
1:100508629|100527505	1	100508629	100527505	3	1_2_0	48	0.111	n/a	/n/a	+
1:100515465|100535241	1	100515465	100535241	12	2_1_3	38	0.387	n/a	/n/a	+
1:100533533|100534142	1	100533533	100534142	7	2_2_0	49	0.222	n/a	/n/a	+
1:100588766|100591498	1	100588766	100591498	11	1_1_4	10	0.688	n/a	/n/a	-
1:100661770|100672192	1	100661770	100672192	19	5_5_0	11	0.776	n/a	/n/a	-
1:100696289|100706440	1	100696289	100706440	6	3_2_1	4	0.75	n/a	/n/a	-
1:100901689|100908552	1	100901689	100908552	2	2_0_1	2	0.667	n/a	/n/a	+
1:101339929|101354384	1	101339929	101354384	4	1_0_2	4	0.667	n/a	/n/a	-
1:101372408|101387397	1	101372408	101387397	5	4_3_1	30	0.25	n/a	/n/a	+
1:101379219|101387397	1	101379219	101387397	31	6_7_2	93	0.4	n/a	/n/a	+
1:101540951|101541272	1	101540951	101541272	6	2_2_0	3	0.8	n/a	/n/a	+
1:108138834|108152587	1	108138834	108152587	3	1_0_2	12	0.333	n/a	/n/a	-
1:108686165|108703915	1	108686165	108703915	6	2_1_1	75	0.138	n/a	/n/a	-
1:108686165|108728576	1	108686165	108728576	4	3_3_0	40	0.167	n/a	/n/a	-
1:108690901|108703915	1	108690901	108703915	51	6_9_12	84	0.548	n/a	/n/a	-
1:108697605|108703915	1	108697605	108703915	10	1_1_4	107	0.157	n/a	/n/a	-
1:108697605|108724650	1	108697605	108724650	12	2_2_3	169	0.124	n/a	/n/a	-
1:108697605|108728576	1	108697605	108728576	33	11_9_1	72	0.478	n/a	/n/a	-
1:108724563|108728576	1	108724563	108728576	67	5_12_12	125	0.517	n/a	/n/a	-
1:108724563|108738102	1	108724563	108738102	19	7_2_11	102	0.271	n/a	/n/a	-
1:108724563|108741687	1	108724563	108741687	8	1_1_3	100	0.138	n/a	/n/a	-
1:109200073|109202584	1	109200073	109202584	19	7_5_4	48	0.442	n/a	/n/a	-
1:109294879|109302707	1	109294879	109302707	3	1_1_3	2	0.75	n/a	/n/a	+
1:109336204|109342927	1	109336204	109342927	9	2_0_2	7	0.72	n/a	/n/a	+
1:109766600|109772194	1	109766600	109772194	18	3_4_2	481	0.07	n/a	/n/a	+
1:109773500|109774408	1	109773500	109774408	2	2_2_0	601	0.007	n/a	/n/a	+
1:109878862|109888500	1	109878862	109888500	7	2_4_2	130	0.097	n/a	/n/a	-
1:109878862|109888503	1	109878862	109888503	7	3_2_2	130	0.097	n/a	/n/a	-
1:109883346|109888500	1	109883346	109888500	10	2_3_1	103	0.163	n/a	/n/a	-
1:109883346|109888503	1	109883346	109888503	19	3_4_1	103	0.27	n/a	/n/a	-
1:109884636|109888500	1	109884636	109888500	9	4_3_0	119	0.131	n/a	/n/a	-
1:109884636|109888503	1	109884636	109888503	10	2_2_3	119	0.144	n/a	/n/a	-
1:109893551|109898091	1	109893551	109898091	4	3_4_1	109	0.068	n/a	/n/a	-
1:109908507|109910103	1	109908507	109910103	2	1_2_0	16	0.2	n/a	/n/a	-
1:109952550|109957985	1	109952550	109957985	2	2_2_0	79	0.048	n/a	/n/a	-
1:110121826|110129504	1	110121826	110129504	6	2_2_0	22	0.353	n/a	/n/a	+
1:111690264|111717585	1	111690264	111717585	17	7_3_3	8	0.81	n/a	/n/a	+
1:112954816|112958886	1	112954816	112958886	8	2_2_1	11	0.593	n/a	/n/a	+
1:113119608|113134225	1	113119608	113134225	4	2_1_1	16	0.333	n/a	/n/a	-
1:113119608|113143470	1	113119608	113143470	9	1_2_1	7	0.72	n/a	/n/a	-
1:113124614|113126748	1	113124614	113126748	7	3_4_0	18	0.438	n/a	/n/a	-
1:113134147|113140708	1	113134147	113140708	4	1_1_2	24	0.25	n/a	/n/a	-
1:113134147|113143470	1	113134147	113143470	14	2_1_2	15	0.651	n/a	/n/a	-
1:113134147|113159517	1	113134147	113159517	11	1_2_3	26	0.458	n/a	/n/a	-
1:113153463|113159517	1	113153463	113159517	7	3_0_3	35	0.286	n/a	/n/a	-
1:113196220|113202401	1	113196220	113202401	28	4_7_8	6	0.903	n/a	/n/a	+
1:113234287|113235551	1	113234287	113235551	8	0_2_1	11	0.593	n/a	/n/a	+
1:113633940|113643110	1	113633940	113643110	2	1_0_2	22	0.154	n/a	/n/a	+
1:113635828|113637377	1	113635828	113637377	7	2_3_0	3	0.824	n/a	/n/a	+
1:114157223|114165616	1	114157223	114165616	14	1_3_1	5	0.848	n/a	/n/a	+
1:114214356|114216087	1	114214356	114216087	10	2_4_2	3	0.87	n/a	/n/a	+
1:114319832|114320430	1	114319832	114320430	4	1_2_0	7	0.533	n/a	/n/a	-
1:114339985|114340658	1	114339985	114340658	4	1_1_1	0	1	n/a	/n/a	-
1:114443858|114444507	1	114443858	114444507	5	2_0_1	4	0.714	n/a	/n/a	-
1:115005726|115006178	1	115005726	115006178	17	4_5_0	148	0.187	n/a	/n/a	-
1:115005726|115007010	1	115005726	115007010	182	41_36_12	30	0.924	n/a	/n/a	-
1:115276353|115280693	1	115276353	115280693	8	4_4_0	73	0.18	n/a	/n/a	-
1:116562203|116563506	1	116562203	116563506	31	9_5_0	12	0.838	n/a	/n/a	+
1:116562203|116569643	1	116562203	116569643	11	4_3_0	23	0.489	n/a	/n/a	+
1:116562203|116574202	1	116562203	116574202	3	2_2_0	20	0.231	n/a	/n/a	+
1:116573987|116580009	1	116573987	116580009	14	5_1_3	7	0.8	n/a	/n/a	+
1:116574024|116580009	1	116574024	116580009	4	2_1_1	16	0.333	n/a	/n/a	+
1:116576379|116580009	1	116576379	116580009	17	5_1_5	8	0.81	n/a	/n/a	+
1:117078587|117087226	1	117078587	117087226	2	2_2_0	0	1	n/a	/n/a	-
1:117544363|117552852	1	117544363	117552852	2	2_2_0	0	1	n/a	/n/a	+
1:117944808|117957453	1	117944808	117957453	10	2_2_2	135	0.129	n/a	/n/a	+
1:117944808|117963271	1	117944808	117963271	20	4_3_8	65	0.381	n/a	/n/a	+
1:117944808|117984947	1	117944808	117984947	20	2_5_6	37	0.519	n/a	/n/a	+
1:117948171|117984947	1	117948171	117984947	8	2_1_3	37	0.302	n/a	/n/a	+
1:117957335|117963271	1	117957335	117963271	7	2_2_0	118	0.106	n/a	/n/a	+
1:117957335|117984947	1	117957335	117984947	22	10_9_1	95	0.317	n/a	/n/a	+
1:117984853|118009049	1	117984853	118009049	3	1_2_1	31	0.162	n/a	/n/a	+
1:118035769|118045592	1	118035769	118045592	13	2_2_3	14	0.65	n/a	/n/a	+
1:118409367|118413238	1	118409367	118413238	6	1_2_2	16	0.429	n/a	/n/a	-
1:118449128|118461358	1	118449128	118461358	17	2_4_3	44	0.436	n/a	/n/a	-
1:118454616|118461358	1	118454616	118461358	13	3_5_2	41	0.388	n/a	/n/a	-
1:119805525|119820595	1	119805525	119820595	23	1_5_10	7	0.868	n/a	/n/a	+
1:120594098|120599240	1	120594098	120599240	3	1_0_2	1	0.857	n/a	/n/a	-
1:144013901|144014093	1	144013901	144014093	3	2_2_0	46	0.115	n/a	/n/a	+
1:144013975|144053668	1	144013975	144053668	4	2_2_0	46	0.148	n/a	/n/a	+
1:144595830|144596473	1	144595830	144596473	12	3_2_1	16	0.6	n/a	/n/a	+
1:144595835|144596473	1	144595835	144596473	13	4_4_1	29	0.473	n/a	/n/a	+
1:144595835|144598780	1	144595835	144598780	13	2_2_2	41	0.388	n/a	/n/a	+
1:144921835|144922638	1	144921835	144922638	15	5_3_0	6	0.833	n/a	/n/a	-
1:145592633|145595220	1	145592633	145595220	17	5_3_1	9	0.791	n/a	/n/a	-
1:145646115|145663367	1	145646115	145663367	23	1_5_6	20	0.697	n/a	/n/a	+
1:145646115|145682094	1	145646115	145682094	2	0_2_2	16	0.2	n/a	/n/a	+
1:146631178|146638518	1	146631178	146638518	2	1_0_2	11	0.267	n/a	/n/a	-
1:146724278|146731572	1	146724278	146731572	79	19_11_15	19	0.893	n/a	/n/a	+
1:146757975|146759412	1	146757975	146759412	58	13_15_4	11	0.913	n/a	/n/a	+
1:149931603|149939446	1	149931603	149939446	3	2_2_0	86	0.065	n/a	/n/a	-
1:150048311|150049309	1	150048311	150049309	5	0_1_2	30	0.25	n/a	/n/a	+
1:150202906|150204264	1	150202906	150204264	23	9_8_2	15	0.754	n/a	/n/a	-
1:150307406|150310802	1	150307406	150310802	5	1_2_0	11	0.476	n/a	/n/a	+
1:150381382|150390201	1	150381382	150390201	3	3_3_0	10	0.375	n/a	/n/a	+
1:150413399|150415759	1	150413399	150415759	8	3_1_3	41	0.281	n/a	/n/a	+
1:150413399|150416853	1	150413399	150416853	35	6_9_7	50	0.583	n/a	/n/a	+
1:150413399|150418877	1	150413399	150418877	10	1_2_3	38	0.345	n/a	/n/a	+
1:150429764|150430046	1	150429764	150430046	19	2_4_1	41	0.481	n/a	/n/a	+
1:150432536|150432793	1	150432536	150432793	8	2_2_0	32	0.333	n/a	/n/a	+
1:150507422|150508444	1	150507422	150508444	4	2_2_0	1	0.889	n/a	/n/a	-
1:150634290|150636239	1	150634290	150636239	6	2_2_1	12	0.5	n/a	/n/a	-
1:150808756|150808969	1	150808756	150808969	4	1_1_2	24	0.25	n/a	/n/a	-
1:150902443|150913904	1	150902443	150913904	16	6_4_1	48	0.4	n/a	/n/a	+
1:150923841|150935195	1	150923841	150935195	5	1_1_2	14	0.417	n/a	/n/a	+
1:150990288|150991145	1	150990288	150991145	11	3_3_0	31	0.415	n/a	/n/a	+
1:150997087|150998149	1	150997087	150998149	15	3_4_2	44	0.405	n/a	/n/a	+
1:150997087|150999803	1	150997087	150999803	15	7_6_2	39	0.435	n/a	/n/a	+
1:150999709|151001420	1	150999709	151001420	16	3_5_5	29	0.525	n/a	/n/a	+
1:151060666|151079698	1	151060666	151079698	4	2_2_0	1	0.889	n/a	/n/a	+
1:151062882|151065862	1	151062882	151065862	4	1_2_0	15	0.348	n/a	/n/a	+
1:151111901|151112566	1	151111901	151112566	3	2_2_0	0	1	n/a	/n/a	-
1:151139410|151139890	1	151139410	151139890	14	5_3_6	218	0.114	n/a	/n/a	+
1:151157982|151158426	1	151157982	151158426	12	4_3_1	274	0.081	n/a	/n/a	-
1:151196724|151205179	1	151196724	151205179	5	0_2_2	33	0.233	n/a	/n/a	+
1:151204147|151205179	1	151204147	151205179	3	1_2_0	35	0.146	n/a	/n/a	+
1:151209034|151209239	1	151209034	151209239	26	4_11_3	15	0.776	n/a	/n/a	+
1:151214599|151215043	1	151214599	151215043	17	7_6_0	31	0.523	n/a	/n/a	+
1:151234637|151236504	1	151234637	151236504	4	3_2_1	48	0.143	n/a	/n/a	+
1:151234637|151237710	1	151234637	151237710	6	2_0_1	46	0.207	n/a	/n/a	+
1:151288049|151288985	1	151288049	151288985	20	6_7_1	93	0.301	n/a	/n/a	-
1:151403142|151414681	1	151403142	151414681	4	1_1_1	12	0.4	n/a	/n/a	-
1:151413404|151414681	1	151413404	151414681	10	3_3_1	13	0.606	n/a	/n/a	-
1:151588260|151611595	1	151588260	151611595	10	2_3_2	19	0.513	n/a	/n/a	+
1:151596061|151611595	1	151596061	151611595	5	1_3_0	20	0.333	n/a	/n/a	+
1:151611364|151611595	1	151611364	151611595	339	49_56_18	41	0.943	n/a	/n/a	+
1:151611364|151641111	1	151611364	151641111	15	4_4_0	57	0.345	n/a	/n/a	+
1:151611364|151655921	1	151611364	151655921	8	1_1_1	51	0.239	n/a	/n/a	+
1:151630711|151630903	1	151630711	151630903	13	6_4_0	38	0.406	n/a	/n/a	+
1:151630711|151634746	1	151630711	151634746	4	2_1_0	28	0.222	n/a	/n/a	+
1:151630711|151641111	1	151630711	151641111	21	6_7_0	32	0.568	n/a	/n/a	+
1:151630711|151655921	1	151630711	151655921	9	4_1_3	27	0.4	n/a	/n/a	+
1:152287382|152307915	1	152287382	152307915	6	1_1_2	0	1	n/a	/n/a	+
1:153637696|153641033	1	153637696	153641033	2	1_0_2	115	0.034	n/a	/n/a	-
1:153640031|153641033	1	153640031	153641033	4	3_2_1	95	0.078	n/a	/n/a	-
1:153723571|153730239	1	153723571	153730239	9	3_4_0	72	0.2	n/a	/n/a	+
1:153727118|153730239	1	153727118	153730239	23	6_7_0	57	0.447	n/a	/n/a	+
1:153784207|153785928	1	153784207	153785928	5	2_2_0	32	0.238	n/a	/n/a	-
1:153791267|153792211	1	153791267	153792211	19	4_4_0	41	0.481	n/a	/n/a	-
1:153909964|153910339	1	153909964	153910339	2	1_1_1	144	0.027	n/a	/n/a	-
1:154184796|154187050	1	154184796	154187050	7	1_2_1	392	0.034	n/a	/n/a	-
1:154209042|154218851	1	154209042	154218851	4	0_1_2	110	0.068	n/a	/n/a	+
1:154213989|154218851	1	154213989	154218851	62	5_14_15	106	0.539	n/a	/n/a	+
1:154420601|154427057	1	154420601	154427057	9	2_2_4	2	0.9	n/a	/n/a	+
1:155235651|155236686	1	155235651	155236686	6	1_3_0	3	0.8	n/a	/n/a	-
1:155307880|155309159	1	155307880	155309159	3	2_1_1	35	0.146	n/a	/n/a	-
1:155313105|155316260	1	155313105	155316260	2	2_0_1	20	0.167	n/a	/n/a	-
1:155322497|155324421	1	155322497	155324421	9	5_4_1	12	0.6	n/a	/n/a	-
1:155340295|155340774	1	155340295	155340774	3	2_2_0	12	0.333	n/a	/n/a	-
1:155348072|155349907	1	155348072	155349907	3	2_0_1	13	0.316	n/a	/n/a	-
1:155365250|155374141	1	155365250	155374141	6	3_3_0	17	0.414	n/a	/n/a	-
1:155365250|155385714	1	155365250	155385714	6	2_1_1	11	0.522	n/a	/n/a	-
1:155377933|155385714	1	155377933	155385714	13	3_6_3	3	0.897	n/a	/n/a	-
1:155385535|155385714	1	155385535	155385714	4	1_2_0	9	0.471	n/a	/n/a	-
1:155408118|155429689	1	155408118	155429689	14	2_1_2	6	0.824	n/a	/n/a	-
1:155490891|155491409	1	155490891	155491409	6	1_1_2	9	0.571	n/a	/n/a	-
1:155630648|155649296	1	155630648	155649296	3	1_1_2	162	0.036	n/a	/n/a	-
1:155640111|155642522	1	155640111	155642522	6	3_1_0	27	0.308	n/a	/n/a	-
1:155640111|155644887	1	155640111	155644887	14	7_4_3	66	0.298	n/a	/n/a	-
1:155640111|155649303	1	155640111	155649303	4	2_3_0	107	0.07	n/a	/n/a	-
1:155640111|155744964	1	155640111	155744964	3	3_1_2	22	0.214	n/a	/n/a	-
1:155644476|155644887	1	155644476	155644887	12	4_2_0	47	0.338	n/a	/n/a	-
1:155644801|155649303	1	155644801	155649303	9	0_1_5	107	0.144	n/a	/n/a	-
1:155646339|155649303	1	155646339	155649303	164	42_27_17	132	0.713	n/a	/n/a	-
1:155646339|155650247	1	155646339	155650247	8	4_0_3	90	0.151	n/a	/n/a	-
1:155646339|155753880	1	155646339	155753880	39	12_11_1	51	0.605	n/a	/n/a	-
1:155646339|155755165	1	155646339	155755165	2	2_0_1	53	0.07	n/a	/n/a	-
1:155679564|155686919	1	155679564	155686919	9	0_3_2	94	0.161	n/a	/n/a	+
1:155679564|155691409	1	155679564	155691409	8	0_2_6	98	0.14	n/a	/n/a	+
1:155686797|155695810	1	155686797	155695810	10	3_0_2	117	0.146	n/a	/n/a	+
1:155691308|155695810	1	155691308	155695810	38	13_9_11	92	0.452	n/a	/n/a	+
1:155695173|155695810	1	155695173	155695810	119	25_22_11	128	0.65	n/a	/n/a	+
1:155734791|155736500	1	155734791	155736500	2	2_1_0	6	0.4	n/a	/n/a	-
1:155747413|155753880	1	155747413	155753880	10	7_4_0	5	0.8	n/a	/n/a	-
1:155783425|155784240	1	155783425	155784240	22	10_4_4	18	0.71	n/a	/n/a	-
1:155823067|155823597	1	155823067	155823597	124	23_25_4	47	0.841	n/a	/n/a	-
1:155891166|155891709	1	155891166	155891709	20	8_2_7	48	0.455	n/a	/n/a	-
1:155895423|155896947	1	155895423	155896947	4	2_1_1	56	0.125	n/a	/n/a	-
1:155896467|155896947	1	155896467	155896947	21	7_3_1	41	0.506	n/a	/n/a	-
1:155927504|155928187	1	155927504	155928187	19	8_5_3	287	0.117	n/a	/n/a	-
1:156169626|156170263	1	156169626	156170263	18	6_7_1	56	0.391	n/a	/n/a	+
1:156202111|156203519	1	156202111	156203519	18	5_6_4	352	0.093	n/a	/n/a	+
1:156230242|156233361	1	156230242	156233361	2	2_1_0	178	0.022	n/a	/n/a	-
1:156290630|156304709	1	156290630	156304709	4	1_0_2	265	0.029	n/a	/n/a	-
1:156303338|156304709	1	156303338	156304709	65	13_3_27	305	0.299	n/a	/n/a	-
1:156303338|156305679	1	156303338	156305679	13	3_0_5	226	0.103	n/a	/n/a	-
1:156526325|156530813	1	156526325	156530813	3	1_1_1	42	0.125	n/a	/n/a	-
1:159888553|159890327	1	159888553	159890327	21	4_6_0	512	0.076	n/a	/n/a	-
1:160267133|160275563	1	160267133	160275563	3	1_1_1	248	0.024	n/a	/n/a	-
1:160293221|160302347	1	160293221	160302347	68	18_14_11	293	0.317	n/a	/n/a	-
1:161748034|161753886	1	161748034	161753886	15	1_3_6	87	0.256	n/a	/n/a	+
1:161771842|161790951	1	161771842	161790951	9	4_3_4	3	0.857	n/a	/n/a	+
1:161816239|161833102	1	161816239	161833102	8	4_4_2	22	0.421	n/a	/n/a	+
1:161821512|161833102	1	161821512	161833102	3	3_2_1	33	0.154	n/a	/n/a	+
1:162535802|162536138	1	162535802	162536138	19	4_7_1	22	0.633	n/a	/n/a	+
1:164761731|164790863	1	164761731	164790863	6	1_1_1	41	0.226	n/a	/n/a	+
1:164776779|164790863	1	164776779	164790863	11	2_2_4	28	0.44	n/a	/n/a	+
1:165648679|165652347	1	165648679	165652347	72	25_21_5	111	0.565	n/a	/n/a	-
1:165648679|165664634	1	165648679	165664634	8	2_1_1	116	0.121	n/a	/n/a	-
1:165649724|165664634	1	165649724	165664634	6	2_2_0	168	0.067	n/a	/n/a	-
1:165651344|165652347	1	165651344	165652347	4	2_2_1	158	0.048	n/a	/n/a	-
1:165859441|165860559	1	165859441	165860559	5	2_2_0	28	0.263	n/a	/n/a	+
1:165859441|165865569	1	165859441	165865569	8	2_2_0	28	0.364	n/a	/n/a	+
1:167515338|167517358	1	167515338	167517358	3	1_1_2	33	0.154	n/a	/n/a	-
1:167734820|167742605	1	167734820	167742605	21	8_5_0	40	0.512	n/a	/n/a	+
1:167734820|167745403	1	167734820	167745403	43	15_9_5	20	0.811	n/a	/n/a	+
1:167741512|167745403	1	167741512	167745403	8	1_1_4	32	0.333	n/a	/n/a	+
1:167741512|167757374	1	167741512	167757374	4	3_2_0	62	0.114	n/a	/n/a	+
1:167921038|167944253	1	167921038	167944253	113	13_36_10	47	0.828	n/a	/n/a	+
1:167935867|167944253	1	167935867	167944253	318	24_54_14	46	0.933	n/a	/n/a	+
1:167971720|167974031	1	167971720	167974031	24	7_8_3	6	0.889	n/a	/n/a	+
1:167985019|167992285	1	167985019	167992285	10	3_1_2	4	0.833	n/a	/n/a	+
1:167988783|167992285	1	167988783	167992285	3	1_2_0	11	0.353	n/a	/n/a	+
1:168034828|168037701	1	168034828	168037701	2	2_2_0	5	0.444	n/a	/n/a	+
1:168200752|168208398	1	168200752	168208398	6	2_0_3	16	0.429	n/a	/n/a	+
1:169199956|169206925	1	169199956	169206925	2	1_1_1	44	0.083	n/a	/n/a	-
1:169199956|169256646	1	169199956	169256646	43	10_7_9	20	0.811	n/a	/n/a	-
1:169256541|169292521	1	169256541	169292521	4	1_1_2	58	0.121	n/a	/n/a	-
1:169279208|169293738	1	169279208	169293738	3	2_1_1	13	0.316	n/a	/n/a	-
1:169288397|169293738	1	169288397	169293738	6	2_2_1	3	0.8	n/a	/n/a	-
1:169349719|169356447	1	169349719	169356447	6	1_1_1	0	1	n/a	/n/a	+
1:169836037|169847960	1	169836037	169847960	7	1_3_1	1	0.933	n/a	/n/a	-
1:169890813|169930376	1	169890813	169930376	4	1_2_0	13	0.381	n/a	/n/a	-
1:169947226|170001116	1	169947226	170001116	79	14_14_12	18	0.898	n/a	/n/a	-
1:169985603|169993737	1	169985603	169993737	5	2_2_0	101	0.09	n/a	/n/a	-
1:171492360|171494104	1	171492360	171494104	5	2_2_1	119	0.078	n/a	/n/a	+
1:171492360|171496983	1	171492360	171496983	15	4_1_2	81	0.27	n/a	/n/a	+
1:171537386|171544267	1	171537386	171544267	3	0_3_3	12	0.333	n/a	/n/a	+
1:172011149|172017890	1	172011149	172017890	8	3_2_0	3	0.842	n/a	/n/a	+
1:172520652|172522510	1	172520652	172522510	4	2_1_2	149	0.051	n/a	/n/a	+
1:172520652|172526934	1	172520652	172526934	184	33_40_16	61	0.858	n/a	/n/a	+
1:172525009|172526934	1	172525009	172526934	39	12_14_0	186	0.295	n/a	/n/a	+
1:172569204|172571927	1	172569204	172571927	15	6_2_6	5	0.857	n/a	/n/a	+
1:172766593|172820622	1	172766593	172820622	4	2_1_0	4	0.667	n/a	/n/a	-
1:173409602|173411187	1	173409602	173411187	9	2_3_0	26	0.409	n/a	/n/a	-
1:173409602|173411236	1	173409602	173411236	8	3_2_0	26	0.381	n/a	/n/a	-
1:173702852|173703425	1	173702852	173703425	12	4_4_0	21	0.533	n/a	/n/a	+
1:173725062|173726298	1	173725062	173726298	10	5_4_0	24	0.455	n/a	/n/a	+
1:173743444|173744981	1	173743444	173744981	14	5_5_1	7	0.8	n/a	/n/a	+
1:173772101|173772643	1	173772101	173772643	6	4_4_0	43	0.218	n/a	/n/a	-
1:173833622|173833842	1	173833622	173833842	5	2_1_0	59	0.145	n/a	/n/a	-
1:173835666|173835934	1	173835666	173835934	5	1_2_0	22	0.312	n/a	/n/a	-
1:173933977|173934258	1	173933977	173934258	11	2_2_0	17	0.564	n/a	/n/a	-
1:173961893|173962273	1	173961893	173962273	31	12_5_1	16	0.795	n/a	/n/a	-
1:174188263|174200493	1	174188263	174200493	6	0_2_1	3	0.8	n/a	/n/a	+
1:174241552|174247917	1	174241552	174247917	5	2_2_0	12	0.455	n/a	/n/a	+
1:174241552|174363283	1	174241552	174363283	4	0_1_2	4	0.667	n/a	/n/a	+
1:174244971|174363283	1	174244971	174363283	7	2_2_0	13	0.519	n/a	/n/a	+
1:174274124|174363283	1	174274124	174363283	2	2_2_0	7	0.364	n/a	/n/a	+
1:174606513|174671394	1	174606513	174671394	11	3_3_1	8	0.733	n/a	/n/a	+
1:174652660|174671394	1	174652660	174671394	3	1_2_0	14	0.3	n/a	/n/a	+
1:175956079|175958615	1	175956079	175958615	19	9_7_1	27	0.585	n/a	/n/a	-
1:175956079|175996824	1	175956079	175996824	3	2_2_0	62	0.088	n/a	/n/a	-
1:175990082|175996824	1	175990082	175996824	4	2_1_1	58	0.121	n/a	/n/a	-
1:175996708|176015460	1	175996708	176015460	49	4_5_10	46	0.681	n/a	/n/a	-
1:176050288|176055026	1	176050288	176055026	4	1_0_2	51	0.136	n/a	/n/a	-
1:176050288|176085817	1	176050288	176085817	30	11_5_3	33	0.645	n/a	/n/a	-
1:176050288|176104222	1	176050288	176104222	12	5_3_2	31	0.436	n/a	/n/a	-
1:176050288|176105683	1	176050288	176105683	32	13_5_2	34	0.653	n/a	/n/a	-
1:176050288|176113236	1	176050288	176113236	4	2_1_1	29	0.216	n/a	/n/a	-
1:176050288|176118210	1	176050288	176118210	8	5_1_2	51	0.239	n/a	/n/a	-
1:176050288|176133027	1	176050288	176133027	6	2_0_2	70	0.146	n/a	/n/a	-
1:176085760|176105683	1	176085760	176105683	7	1_1_1	46	0.233	n/a	/n/a	-
1:176104146|176133027	1	176104146	176133027	4	2_0_2	53	0.131	n/a	/n/a	-
1:176105624|176145143	1	176105624	176145143	4	1_1_1	78	0.093	n/a	/n/a	-
1:176118142|176133027	1	176118142	176133027	16	3_3_7	54	0.372	n/a	/n/a	-
1:176118142|176145143	1	176118142	176145143	28	2_5_3	84	0.4	n/a	/n/a	-
1:176118142|176153828	1	176118142	176153828	33	12_3_18	37	0.641	n/a	/n/a	-
1:176132005|176133027	1	176132005	176133027	21	9_5_8	100	0.296	n/a	/n/a	-
1:176132005|176145143	1	176132005	176145143	58	11_8_8	129	0.473	n/a	/n/a	-
1:176132005|176145940	1	176132005	176145940	6	1_0_2	58	0.171	n/a	/n/a	-
1:176132005|176153828	1	176132005	176153828	136	30_13_21	84	0.764	n/a	/n/a	-
1:178180213|178184597	1	178180213	178184597	2	1_0_2	3	0.571	n/a	/n/a	+
1:178252699|178269253	1	178252699	178269253	19	4_5_3	30	0.559	n/a	/n/a	+
1:178252699|178389755	1	178252699	178389755	6	0_2_3	14	0.462	n/a	/n/a	+
1:178706243|178710744	1	178706243	178710744	5	2_2_0	5	0.667	n/a	/n/a	+
1:178745817|178754742	1	178745817	178754742	17	6_1_6	7	0.829	n/a	/n/a	+
1:178745817|178780539	1	178745817	178780539	2	2_1_1	41	0.089	n/a	/n/a	+
1:178777180|178802685	1	178777180	178802685	6	0_2_2	11	0.522	n/a	/n/a	+
1:178780450|178802685	1	178780450	178802685	2	2_2_0	26	0.133	n/a	/n/a	+
1:178846633|178852668	1	178846633	178852668	4	3_0_2	8	0.5	n/a	/n/a	+
1:179012850|179013359	1	179012850	179013359	4	2_2_1	68	0.105	n/a	/n/a	+
1:179012850|179019500	1	179012850	179019500	10	3_2_1	35	0.364	n/a	/n/a	+
1:179012850|179023773	1	179012850	179023773	21	7_8_4	27	0.609	n/a	/n/a	+
1:179033062|179033631	1	179033062	179033631	31	8_9_0	48	0.564	n/a	/n/a	+
1:179033062|179035994	1	179033062	179035994	18	7_2_4	45	0.444	n/a	/n/a	+
1:179067925|179068380	1	179067925	179068380	6	2_2_0	3	0.8	n/a	/n/a	-
1:179079417|179081533	1	179079417	179081533	5	2_2_0	41	0.196	n/a	/n/a	-
1:179081444|179091002	1	179081444	179091002	4	1_2_0	18	0.308	n/a	/n/a	-
1:179089325|179091002	1	179089325	179091002	9	2_3_1	32	0.36	n/a	/n/a	-
1:179100446|179102509	1	179100446	179102509	151	33_11_27	55	0.846	n/a	/n/a	-
1:179271812|179276351	1	179271812	179276351	12	3_5_0	31	0.436	n/a	/n/a	+
1:179306972|179310445	1	179306972	179310445	4	1_2_1	30	0.211	n/a	/n/a	+
1:179311249|179312770	1	179311249	179312770	3	1_0_2	31	0.162	n/a	/n/a	+
1:179858445|179883189	1	179858445	179883189	10	1_0_5	24	0.455	n/a	/n/a	+
1:179869261|179877808	1	179869261	179877808	5	0_1_2	53	0.159	n/a	/n/a	+
1:179955304|179961356	1	179955304	179961356	23	3_4_4	13	0.78	n/a	/n/a	+
1:179959642|179961356	1	179959642	179961356	7	4_4_0	24	0.368	n/a	/n/a	+
1:179972309|179975702	1	179972309	179975702	22	8_8_7	13	0.772	n/a	/n/a	+
1:180047598|180049796	1	180047598	180049796	21	6_8_0	6	0.875	n/a	/n/a	+
1:180366651|180382606	1	180366651	180382606	153	18_21_33	62	0.832	n/a	/n/a	-
1:180756889|180780624	1	180756889	180780624	3	0_1_2	7	0.462	n/a	/n/a	+
1:180793889|180794480	1	180793889	180794480	40	15_15_2	15	0.842	n/a	/n/a	+
1:180953813|180962561	1	180953813	180962561	44	8_5_14	85	0.509	n/a	/n/a	-
1:180953813|180974599	1	180953813	180974599	4	0_2_1	51	0.136	n/a	/n/a	-
1:180971742|180974599	1	180971742	180974599	32	10_11_3	24	0.727	n/a	/n/a	-
1:182811680|182812569	1	182811680	182812569	11	2_5_1	42	0.344	n/a	/n/a	+
1:183072463|183077541	1	183072463	183077541	3	1_2_1	73	0.076	n/a	/n/a	+
1:183083666|183084772	1	183083666	183084772	8	4_3_0	125	0.113	n/a	/n/a	+
1:183481972|183486955	1	183481972	183486955	8	0_3_3	11	0.593	n/a	/n/a	+
1:183866942|183869370	1	183866942	183869370	2	2_1_0	4	0.5	n/a	/n/a	+
1:184701971|184706845	1	184701971	184706845	10	2_1_2	15	0.571	n/a	/n/a	-
1:184701971|184718726	1	184701971	184718726	3	2_1_1	12	0.333	n/a	/n/a	-
1:185056684|185060871	1	185056684	185060871	14	5_6_0	3	0.903	n/a	/n/a	+
1:185149523|185154063	1	185149523	185154063	3	0_2_2	3	0.667	n/a	/n/a	+
1:185183639|185200840	1	185183639	185200840	5	3_2_0	0	1	n/a	/n/a	+
1:185270566|185274775	1	185270566	185274775	3	2_0_2	94	0.06	n/a	/n/a	-
1:185278515|185280454	1	185278515	185280454	4	1_2_0	32	0.2	n/a	/n/a	-
1:185323904|185343688	1	185323904	185343688	5	2_2_0	4	0.714	n/a	/n/a	+
1:185335549|185343688	1	185335549	185343688	8	4_4_0	8	0.667	n/a	/n/a	+
1:185647331|185650021	1	185647331	185650021	3	1_1_1	8	0.429	n/a	/n/a	+
1:186375215|186388209	1	186375215	186388209	7	1_1_2	7	0.667	n/a	/n/a	+
1:186404357|186420406	1	186404357	186420406	4	0_1_2	10	0.444	n/a	/n/a	+
1:186420311|186439527	1	186420311	186439527	2	2_2_0	2	0.667	n/a	/n/a	+
1:193013179|193020947	1	193013179	193020947	3	2_1_0	2	0.75	n/a	/n/a	-
1:193044950|193046180	1	193044950	193046180	18	5_3_1	19	0.655	n/a	/n/a	+
1:193065778|193070334	1	193065778	193070334	12	4_4_4	15	0.615	n/a	/n/a	-
1:193116997|193121574	1	193116997	193121574	3	1_0_2	17	0.261	n/a	/n/a	+
1:193172925|193181607	1	193172925	193181607	5	1_0_2	15	0.4	n/a	/n/a	+
1:193202123|193205486	1	193202123	193205486	67	19_11_12	31	0.812	n/a	/n/a	+
1:193318263|193324988	1	193318263	193324988	2	2_0_1	0	1	n/a	/n/a	+
1:193318263|193324991	1	193318263	193324991	2	2_2_0	0	1	n/a	/n/a	+
1:197086919|197094085	1	197086919	197094085	2	2_1_1	3	0.571	n/a	/n/a	-
1:197086919|197115724	1	197086919	197115724	4	2_1_1	124	0.061	n/a	/n/a	-
1:197101415|197104372	1	197101415	197104372	5	1_2_1	14	0.417	n/a	/n/a	-
1:197141290|197147642	1	197141290	197147642	9	1_3_2	7	0.72	n/a	/n/a	-
1:197522152|197564463	1	197522152	197564463	5	1_2_1	80	0.111	n/a	/n/a	-
1:197522152|197586889	1	197522152	197586889	9	1_3_2	116	0.134	n/a	/n/a	-
1:197552282|197564463	1	197552282	197564463	9	1_1_2	84	0.176	n/a	/n/a	-
1:197552282|197581106	1	197552282	197581106	11	1_0_3	47	0.319	n/a	/n/a	-
1:197552282|197586889	1	197552282	197586889	4	2_2_2	117	0.064	n/a	/n/a	-
1:197552282|197614873	1	197552282	197614873	33	5_5_4	277	0.192	n/a	/n/a	-
1:197552282|197684204	1	197552282	197684204	7	1_0_2	63	0.182	n/a	/n/a	-
1:197552282|197742062	1	197552282	197742062	10	3_0_3	31	0.392	n/a	/n/a	-
1:197564338|197586889	1	197564338	197586889	9	5_4_1	168	0.097	n/a	/n/a	-
1:197564338|197684204	1	197564338	197684204	8	3_0_2	114	0.123	n/a	/n/a	-
1:197611841|197621445	1	197611841	197621445	7	2_2_0	466	0.029	n/a	/n/a	-
1:197611841|197627499	1	197611841	197627499	53	13_6_14	283	0.272	n/a	/n/a	-
1:197611841|197643299	1	197611841	197643299	27	6_2_13	201	0.212	n/a	/n/a	-
1:197611841|197684204	1	197611841	197684204	15	3_1_5	160	0.158	n/a	/n/a	-
1:197611841|197701605	1	197611841	197701605	6	1_0_2	114	0.095	n/a	/n/a	-
1:197611841|197742062	1	197611841	197742062	18	7_1_8	128	0.22	n/a	/n/a	-
1:197621365|197643299	1	197621365	197643299	51	11_1_20	385	0.209	n/a	/n/a	-
1:197621365|197684204	1	197621365	197684204	58	9_3_21	352	0.248	n/a	/n/a	-
1:197621365|197742062	1	197621365	197742062	3	1_0_2	321	0.018	n/a	/n/a	-
1:197641167|197643299	1	197641167	197643299	19	5_0_9	297	0.113	n/a	/n/a	-
1:197641167|197684204	1	197641167	197684204	16	5_1_8	275	0.104	n/a	/n/a	-
1:197641167|197742062	1	197641167	197742062	6	2_1_1	258	0.044	n/a	/n/a	-
1:197684161|197742062	1	197684161	197742062	4	1_0_2	88	0.083	n/a	/n/a	-
1:198201683|198222310	1	198201683	198222310	12	4_5_1	68	0.261	n/a	/n/a	+
1:198201683|198233365	1	198201683	198233365	70	13_16_12	89	0.611	n/a	/n/a	+
1:198201683|198266370	1	198201683	198266370	9	2_2_0	56	0.243	n/a	/n/a	+
1:198222170|198233365	1	198222170	198233365	75	15_14_6	117	0.562	n/a	/n/a	+
1:198222170|198266370	1	198222170	198266370	3	2_2_1	90	0.062	n/a	/n/a	+
1:198231705|198262169	1	198231705	198262169	3	1_1_1	87	0.065	n/a	/n/a	+
1:198231705|198266370	1	198231705	198266370	9	0_4_4	60	0.231	n/a	/n/a	+
1:198247091|198262169	1	198247091	198262169	7	1_1_1	105	0.118	n/a	/n/a	+
1:198247091|198266370	1	198247091	198266370	23	2_3_9	79	0.368	n/a	/n/a	+
1:200539039|200544819	1	200539039	200544819	2	2_2_0	9	0.308	n/a	/n/a	-
1:200577958|200584737	1	200577958	200584737	10	1_2_2	38	0.345	n/a	/n/a	-
1:200577958|200587780	1	200577958	200587780	2	1_1_1	29	0.121	n/a	/n/a	-
1:200583446|200584737	1	200583446	200584737	23	5_8_7	24	0.657	n/a	/n/a	-
1:200583446|200586873	1	200583446	200586873	4	1_1_1	38	0.174	n/a	/n/a	-
1:200709042|200776665	1	200709042	200776665	2	0_2_1	141	0.028	n/a	/n/a	+
1:200709042|200784772	1	200709042	200784772	3	0_2_2	21	0.222	n/a	/n/a	+
1:200729967|200730226	1	200729967	200730226	150	25_28_5	146	0.673	n/a	/n/a	+
1:200729967|200776665	1	200729967	200776665	6	4_3_1	154	0.072	n/a	/n/a	+
1:200729967|200784772	1	200729967	200784772	200	41_21_29	34	0.922	n/a	/n/a	+
1:200729967|200801973	1	200729967	200801973	42	11_13_1	23	0.785	n/a	/n/a	+
1:200776504|200784772	1	200776504	200784772	24	7_3_5	169	0.221	n/a	/n/a	+
1:200776504|200801973	1	200776504	200801973	14	7_7_0	159	0.15	n/a	/n/a	+
1:201816407|201817722	1	201816407	201817722	58	4_19_14	40	0.744	n/a	/n/a	+
1:201821232|201828122	1	201821232	201828122	7	1_3_1	49	0.222	n/a	/n/a	+
1:202380746|202398057	1	202380746	202398057	6	1_0_2	1	0.923	n/a	/n/a	+
1:202385915|202398057	1	202385915	202398057	21	9_7_4	6	0.875	n/a	/n/a	+
1:202391748|202398057	1	202391748	202398057	8	3_2_1	30	0.348	n/a	/n/a	+
1:202418117|202465950	1	202418117	202465950	6	3_0_3	36	0.25	n/a	/n/a	+
1:202718073|202719906	1	202718073	202719906	4	2_2_0	7	0.533	n/a	/n/a	-
1:202724399|202733273	1	202724399	202733273	5	1_1_1	0	1	n/a	/n/a	-
1:202742246|202743863	1	202742246	202743863	6	2_2_0	11	0.522	n/a	/n/a	-
1:202742246|202746222	1	202742246	202746222	10	4_2_0	2	0.909	n/a	/n/a	-
1:202865982|202880331	1	202865982	202880331	2	1_2_0	36	0.1	n/a	/n/a	-
1:202878138|202880331	1	202878138	202880331	3	2_2_0	36	0.143	n/a	/n/a	-
1:202920058|202923435	1	202920058	202923435	5	1_0_3	267	0.036	n/a	/n/a	-
1:203651870|203652526	1	203651870	203652526	3	2_2_0	13	0.316	n/a	/n/a	+
1:203676137|203677232	1	203676137	203677232	6	2_2_1	32	0.273	n/a	/n/a	+
1:204082043|204083733	1	204082043	204083733	18	6_4_3	10	0.783	n/a	/n/a	+
1:205156546|205156934	1	205156546	205156934	8	4_4_0	15	0.516	n/a	/n/a	-
1:205585606|205593019	1	205585606	205593019	6	1_3_1	19	0.387	n/a	/n/a	-
1:205679951|205681106	1	205679951	205681106	3	2_0_1	6	0.5	n/a	/n/a	-
1:207519078|207539209	1	207519078	207539209	2	0_1_2	11	0.267	n/a	/n/a	+
1:207532891|207536124	1	207532891	207536124	3	2_1_1	23	0.207	n/a	/n/a	+
1:207930359|207933069	1	207930359	207933069	12	4_2_2	36	0.4	n/a	/n/a	+
1:207930359|207940540	1	207930359	207940540	3	2_2_0	70	0.079	n/a	/n/a	+
1:207930359|207943707	1	207930359	207943707	5	3_0_2	55	0.154	n/a	/n/a	+
1:207989274|207990759	1	207989274	207990759	108	33_32_2	12	0.947	n/a	/n/a	-
1:211092982|211093411	1	211092982	211093411	17	7_6_0	8	0.81	n/a	/n/a	-
1:211192206|211192598	1	211192206	211192598	10	4_1_1	0	1	n/a	/n/a	-
1:211563906|211570173	1	211563906	211570173	2	2_1_0	0	1	n/a	/n/a	+
1:211564958|211565318	1	211564958	211565318	9	2_2_1	21	0.462	n/a	/n/a	+
1:212125005|212126043	1	212125005	212126043	5	2_2_0	30	0.25	n/a	/n/a	-
1:212179981|212184763	1	212179981	212184763	22	8_1_9	90	0.328	n/a	/n/a	-
1:212179981|212190365	1	212179981	212190365	7	1_2_1	45	0.237	n/a	/n/a	-
1:212179981|212194554	1	212179981	212194554	16	3_4_1	20	0.615	n/a	/n/a	-
1:212190228|212194554	1	212190228	212194554	26	8_7_2	94	0.356	n/a	/n/a	-
1:212190228|212208745	1	212190228	212208745	8	1_1_2	92	0.148	n/a	/n/a	-
1:212193464|212194554	1	212193464	212194554	8	2_2_0	60	0.211	n/a	/n/a	-
1:212216335|212220759	1	212216335	212220759	11	2_2_3	25	0.468	n/a	/n/a	+
1:212218002|212220759	1	212218002	212220759	67	11_15_14	37	0.784	n/a	/n/a	+
1:212236226|212238371	1	212236226	212238371	3	1_2_2	9	0.4	n/a	/n/a	+
1:212240154|212254092	1	212240154	212254092	6	0_2_2	31	0.279	n/a	/n/a	+
1:212273594|212276294	1	212273594	212276294	10	3_3_0	16	0.556	n/a	/n/a	+
1:212480125|212506940	1	212480125	212506940	2	2_2_0	97	0.04	n/a	/n/a	+
1:212499325|212506940	1	212499325	212506940	7	2_2_3	97	0.126	n/a	/n/a	+
1:212502477|212506940	1	212502477	212506940	182	22_13_25	109	0.77	n/a	/n/a	+
1:212502477|212515622	1	212502477	212515622	5	2_1_1	60	0.143	n/a	/n/a	+
1:212502477|212519275	1	212502477	212519275	11	6_5_0	38	0.367	n/a	/n/a	+
1:212502477|212532129	1	212502477	212532129	7	2_1_1	33	0.298	n/a	/n/a	+
1:212506839|212522584	1	212506839	212522584	4	1_0_2	138	0.055	n/a	/n/a	+
1:212515530|212522584	1	212515530	212522584	5	2_1_3	105	0.087	n/a	/n/a	+
1:212529968|212530626	1	212529968	212530626	4	2_2_0	33	0.195	n/a	/n/a	+
1:212957705|212960979	1	212957705	212960979	17	5_4_1	22	0.607	n/a	/n/a	-
1:213037067|213046160	1	213037067	213046160	25	9_11_0	62	0.446	n/a	/n/a	+
1:213037067|213058738	1	213037067	213058738	25	7_6_2	48	0.51	n/a	/n/a	+
1:213037067|213062599	1	213037067	213062599	13	6_5_1	37	0.413	n/a	/n/a	+
1:213043396|213046160	1	213043396	213046160	8	2_4_1	79	0.168	n/a	/n/a	+
1:213046020|213058738	1	213046020	213058738	4	2_1_2	175	0.044	n/a	/n/a	+
1:213046020|213062599	1	213046020	213062599	6	4_3_1	164	0.068	n/a	/n/a	+
1:213046020|213068696	1	213046020	213068696	2	2_2_0	151	0.026	n/a	/n/a	+
1:213056713|213068713	1	213056713	213068713	5	1_1_1	48	0.172	n/a	/n/a	+
1:213244348|213251158	1	213244348	213251158	7	2_3_1	121	0.104	n/a	/n/a	+
1:213244348|213277911	1	213244348	213277911	7	1_3_4	115	0.109	n/a	/n/a	+
1:213244348|213290752	1	213244348	213290752	13	1_5_5	56	0.317	n/a	/n/a	+
1:213251038|213251421	1	213251038	213251421	3	1_2_1	60	0.091	n/a	/n/a	+
1:213251038|213277911	1	213251038	213277911	5	3_3_0	167	0.056	n/a	/n/a	+
1:213251038|213290752	1	213251038	213290752	115	24_16_28	109	0.678	n/a	/n/a	+
1:213277796|213290752	1	213277796	213290752	8	3_4_2	172	0.085	n/a	/n/a	+
1:213277796|213303232	1	213277796	213303232	3	1_1_2	136	0.042	n/a	/n/a	+
1:213290659|213303232	1	213290659	213303232	39	9_9_2	109	0.417	n/a	/n/a	+
1:213302870|213349835	1	213302870	213349835	7	2_2_1	111	0.112	n/a	/n/a	+
1:213341201|213349835	1	213341201	213349835	90	20_14_13	44	0.804	n/a	/n/a	+
1:213415912|213436159	1	213415912	213436159	15	3_5_2	33	0.476	n/a	/n/a	+
1:213434901|213436159	1	213434901	213436159	8	0_1_2	47	0.254	n/a	/n/a	+
1:214564331|214571344	1	214564331	214571344	19	4_3_9	23	0.623	n/a	/n/a	-
1:214625148|214638300	1	214625148	214638300	13	5_4_0	35	0.426	n/a	/n/a	-
1:214637973|214638300	1	214637973	214638300	28	8_9_3	51	0.523	n/a	/n/a	-
1:215342542|215345526	1	215342542	215345526	42	7_13_0	25	0.771	n/a	/n/a	+
1:215408171|215408522	1	215408171	215408522	6	3_2_0	0	1	n/a	/n/a	+
1:215747129|215753342	1	215747129	215753342	5	2_1_3	41	0.196	n/a	/n/a	+
1:215749244|215752480	1	215749244	215752480	5	3_3_1	94	0.096	n/a	/n/a	+
1:215759838|215768813	1	215759838	215768813	6	3_4_0	57	0.174	n/a	/n/a	+
1:217665022|217688231	1	217665022	217688231	5	1_1_2	33	0.233	n/a	/n/a	-
1:217783663|217787544	1	217783663	217787544	27	5_9_17	16	0.771	n/a	/n/a	-
1:219366424|219385094	1	219366424	219385094	41	12_11_3	60	0.577	n/a	/n/a	+
1:219366424|219392054	1	219366424	219392054	57	16_18_1	8	0.934	n/a	/n/a	+
1:219366424|219414650	1	219366424	219414650	22	8_7_2	4	0.917	n/a	/n/a	+
1:219366424|219484777	1	219366424	219484777	8	2_3_0	4	0.8	n/a	/n/a	+
1:220174480|220180680	1	220174480	220180680	7	2_2_0	41	0.255	n/a	/n/a	-
1:220179448|220180680	1	220179448	220180680	20	8_7_0	96	0.294	n/a	/n/a	-
1:220298579|220311385	1	220298579	220311385	8	1_3_3	74	0.178	n/a	/n/a	+
1:220307744|220313631	1	220307744	220313631	4	2_2_0	109	0.068	n/a	/n/a	+
1:220310151|220312481	1	220310151	220312481	3	1_1_1	54	0.1	n/a	/n/a	+
1:220344234|220346084	1	220344234	220346084	12	3_3_0	13	0.649	n/a	/n/a	-
1:220355599|220356273	1	220355599	220356273	13	6_7_3	14	0.65	n/a	/n/a	-
1:220386229|220387321	1	220386229	220387321	24	4_8_8	34	0.585	n/a	/n/a	-
1:220752696|220771721	1	220752696	220771721	4	1_0_2	14	0.364	n/a	/n/a	+
1:220771673|220792097	1	220771673	220792097	15	0_3_5	16	0.652	n/a	/n/a	+
1:220777409|220792097	1	220777409	220792097	8	0_2_4	22	0.421	n/a	/n/a	+
1:220789281|220792097	1	220789281	220792097	8	1_1_1	38	0.296	n/a	/n/a	+
1:220789281|220809368	1	220789281	220809368	4	2_2_1	39	0.17	n/a	/n/a	+
1:222731473|222737467	1	222731473	222737467	2	1_0_2	2	0.667	n/a	/n/a	-
1:222897434|222898897	1	222897434	222898897	20	3_5_5	16	0.714	n/a	/n/a	+
1:222897434|222898911	1	222897434	222898911	2	1_1_1	13	0.235	n/a	/n/a	+
1:222997226|223045774	1	222997226	223045774	17	0_1_4	12	0.739	n/a	/n/a	+
1:223946972|223949953	1	223946972	223949953	2	2_0_1	150	0.026	n/a	/n/a	+
1:223991876|223994649	1	223991876	223994649	27	8_7_3	14	0.794	n/a	/n/a	-
1:224142179|224149975	1	224142179	224149975	39	10_11_3	8	0.907	n/a	/n/a	-
1:224418928|224455835	1	224418928	224455835	5	1_1_2	44	0.185	n/a	/n/a	-
1:224424208|224455835	1	224424208	224455835	6	0_2_2	50	0.194	n/a	/n/a	-
1:224437914|224455835	1	224437914	224455835	10	3_3_5	64	0.238	n/a	/n/a	-
1:224454706|224455835	1	224454706	224455835	27	9_4_5	52	0.509	n/a	/n/a	-
1:224492438|224492868	1	224492438	224492868	3	0_1_2	42	0.125	n/a	/n/a	-
1:224553581|224559125	1	224553581	224559125	46	10_16_4	168	0.354	n/a	/n/a	+
1:224553581|224567357	1	224553581	224567357	13	3_1_4	59	0.306	n/a	/n/a	+
1:224585799|224586736	1	224585799	224586736	2	2_2_0	66	0.057	n/a	/n/a	-
1:224703443|224734641	1	224703443	224734641	5	2_2_0	8	0.556	n/a	/n/a	+
1:225140372|225156576	1	225140372	225156576	57	13_14_10	55	0.675	n/a	/n/a	+
1:225140372|225161855	1	225140372	225161855	22	5_4_5	30	0.595	n/a	/n/a	+
1:225140372|225195246	1	225140372	225195246	87	19_20_10	73	0.704	n/a	/n/a	+
1:225140372|225211567	1	225140372	225211567	2	1_2_0	41	0.089	n/a	/n/a	+
1:225161793|225195246	1	225161793	225195246	6	1_2_1	98	0.109	n/a	/n/a	+
1:225161793|225284941	1	225161793	225284941	7	1_3_3	95	0.128	n/a	/n/a	+
1:225190485|225211567	1	225190485	225211567	11	3_5_2	47	0.319	n/a	/n/a	+
1:225195115|225211567	1	225195115	225211567	14	6_8_3	117	0.193	n/a	/n/a	+
1:225195115|225226525	1	225195115	225226525	7	2_3_1	115	0.109	n/a	/n/a	+
1:225195115|225284941	1	225195115	225284941	78	12_17_6	141	0.525	n/a	/n/a	+
1:225211317|225211567	1	225211317	225211567	17	5_5_1	90	0.274	n/a	/n/a	+
1:225211317|225226525	1	225211317	225226525	3	2_2_0	93	0.061	n/a	/n/a	+
1:225211317|225284941	1	225211317	225284941	5	2_2_0	116	0.079	n/a	/n/a	+
1:225226396|225231491	1	225226396	225231491	6	3_1_2	49	0.197	n/a	/n/a	+
1:225226396|225231685	1	225226396	225231685	6	0_1_3	38	0.24	n/a	/n/a	+
1:225260457|225284941	1	225260457	225284941	4	2_1_0	68	0.105	n/a	/n/a	+
1:225266909|225284941	1	225266909	225284941	5	3_3_0	77	0.115	n/a	/n/a	+
1:225268081|225284941	1	225268081	225284941	9	3_3_0	64	0.22	n/a	/n/a	+
1:225270251|225284941	1	225270251	225284941	19	4_4_1	84	0.311	n/a	/n/a	+
1:225270251|225332330	1	225270251	225332330	5	1_1_1	33	0.233	n/a	/n/a	+
1:225273246|225284941	1	225273246	225284941	6	2_2_1	100	0.107	n/a	/n/a	+
1:225273412|225284941	1	225273412	225284941	54	6_13_13	161	0.401	n/a	/n/a	+
1:225306922|225311316	1	225306922	225311316	12	2_3_7	22	0.522	n/a	/n/a	+
1:225332099|225341528	1	225332099	225341528	6	2_1_1	25	0.324	n/a	/n/a	+
1:225339707|225341528	1	225339707	225341528	8	0_2_2	43	0.271	n/a	/n/a	+
1:225339707|225373127	1	225339707	225373127	8	2_3_2	54	0.229	n/a	/n/a	+
1:225355641|225373127	1	225355641	225373127	10	1_1_3	58	0.256	n/a	/n/a	+
1:225355641|225393881	1	225355641	225393881	10	1_4_2	43	0.317	n/a	/n/a	+
1:225355641|225394922	1	225355641	225394922	10	0_4_6	36	0.357	n/a	/n/a	+
1:225355641|225428524	1	225355641	225428524	3	1_2_0	29	0.171	n/a	/n/a	+
1:225372993|225393881	1	225372993	225393881	7	3_3_0	40	0.259	n/a	/n/a	+
1:225372993|225394922	1	225372993	225394922	22	6_8_0	33	0.571	n/a	/n/a	+
1:225391885|225394922	1	225391885	225394922	8	2_3_0	25	0.39	n/a	/n/a	+
1:225451899|225454471	1	225451899	225454471	5	2_2_0	7	0.588	n/a	/n/a	+
1:225451899|225477784	1	225451899	225477784	8	1_4_2	6	0.727	n/a	/n/a	+
1:225600156|225603034	1	225600156	225603034	34	11_3_5	74	0.479	n/a	/n/a	-
1:225695653|225700718	1	225695653	225700718	4	1_2_0	17	0.32	n/a	/n/a	-
1:225718256|225742785	1	225718256	225742785	3	2_1_0	155	0.037	n/a	/n/a	-
1:225718256|225754997	1	225718256	225754997	3	1_0_2	159	0.036	n/a	/n/a	-
1:225718256|225755116	1	225718256	225755116	65	12_22_12	63	0.674	n/a	/n/a	-
1:225742608|225755116	1	225742608	225755116	174	37_39_5	136	0.719	n/a	/n/a	-
1:225754951|225840135	1	225754951	225840135	7	1_1_1	115	0.109	n/a	/n/a	-
1:225829578|225830180	1	225829578	225830180	2	1_1_1	1	0.8	n/a	/n/a	-
1:226016426|226017235	1	226016426	226017235	3	2_2_0	51	0.105	n/a	/n/a	+
1:226016426|226019660	1	226016426	226019660	2	2_1_0	255	0.015	n/a	/n/a	+
1:226483543|226488906	1	226483543	226488906	7	1_0_3	10	0.583	n/a	/n/a	-
1:227192695|227204751	1	227192695	227204751	50	16_16_3	43	0.699	n/a	/n/a	-
1:227203781|227213853	1	227203781	227213853	6	2_2_2	71	0.145	n/a	/n/a	-
1:227210964|227214791	1	227210964	227214791	5	1_2_1	28	0.263	n/a	/n/a	-
1:227227832|227257554	1	227227832	227257554	7	2_1_2	19	0.424	n/a	/n/a	-
1:227327277|227335260	1	227327277	227335260	75	18_19_1	29	0.838	n/a	/n/a	-
1:227348244|227387353	1	227348244	227387353	2	1_2_1	77	0.049	n/a	/n/a	-
1:227348244|227400920	1	227348244	227400920	5	1_1_2	23	0.303	n/a	/n/a	-
1:227381487|227387353	1	227381487	227387353	42	12_7_4	93	0.475	n/a	/n/a	-
1:227381487|227400920	1	227381487	227400920	53	13_7_9	41	0.721	n/a	/n/a	-
1:227381487|227441856	1	227381487	227441856	5	1_1_1	35	0.222	n/a	/n/a	-
1:227381487|227504947	1	227381487	227504947	11	5_5_0	48	0.314	n/a	/n/a	-
1:227441765|227504947	1	227441765	227504947	3	0_2_2	21	0.222	n/a	/n/a	-
1:227935393|227935934	1	227935393	227935934	9	5_5_0	19	0.486	n/a	/n/a	+
1:228284779|228285416	1	228284779	228285416	4	2_1_0	450	0.017	n/a	/n/a	+
1:228401142|228412435	1	228401142	228412435	7	1_2_0	26	0.35	n/a	/n/a	+
1:228412160|228412435	1	228412160	228412435	5	2_2_0	0	1	n/a	/n/a	+
1:228496800|228497260	1	228496800	228497260	7	4_1_3	38	0.269	n/a	/n/a	+
1:228582438|228582953	1	228582438	228582953	6	3_2_0	84	0.125	n/a	/n/a	-
1:229422233|229439747	1	229422233	229439747	3	0_1_2	9	0.4	n/a	/n/a	+
1:229586272|229601266	1	229586272	229601266	4	0_1_3	16	0.333	n/a	/n/a	-
1:229593908|229596516	1	229593908	229596516	9	5_6_0	59	0.234	n/a	/n/a	-
1:229596358|229599423	1	229596358	229599423	13	3_5_1	63	0.292	n/a	/n/a	-
1:229596358|229601266	1	229596358	229601266	7	2_1_2	31	0.311	n/a	/n/a	-
1:229599290|229601266	1	229599290	229601266	10	3_2_2	57	0.26	n/a	/n/a	-
1:229619801|229623360	1	229619801	229623360	4	0_2_2	48	0.143	n/a	/n/a	-
1:229625702|229634053	1	229625702	229634053	3	2_1_1	29	0.171	n/a	/n/a	-
1:229675203|229678118	1	229675203	229678118	5	1_1_1	10	0.5	n/a	/n/a	-
1:229675203|229685181	1	229675203	229685181	11	3_4_1	1	0.957	n/a	/n/a	-
1:230313964|230339036	1	230313964	230339036	8	1_3_0	48	0.25	n/a	/n/a	+
1:230371760|230372471	1	230371760	230372471	14	2_1_6	73	0.277	n/a	/n/a	+
1:230371760|230391090	1	230371760	230391090	2	0_1_2	77	0.049	n/a	/n/a	+
1:230398319|230401113	1	230398319	230401113	15	1_2_3	262	0.103	n/a	/n/a	+
1:230795210|230796569	1	230795210	230796569	5	1_1_1	21	0.323	n/a	/n/a	+
1:230795210|230800333	1	230795210	230800333	11	6_6_0	149	0.129	n/a	/n/a	+
1:230798887|230800333	1	230798887	230800333	27	1_9_11	174	0.237	n/a	/n/a	+
1:230798887|230807386	1	230798887	230807386	59	9_15_6	110	0.518	n/a	/n/a	+
1:230798887|230810870	1	230798887	230810870	50	8_15_12	49	0.671	n/a	/n/a	+
1:230819320|230822878	1	230819320	230822878	5	1_2_1	33	0.233	n/a	/n/a	+
1:231079552|231097049	1	231079552	231097049	47	9_10_14	32	0.746	n/a	/n/a	-
1:231081135|231097049	1	231081135	231097049	53	2_10_22	52	0.671	n/a	/n/a	-
1:231090079|231097049	1	231090079	231097049	174	21_27_52	169	0.673	n/a	/n/a	-
1:231500073|231503382	1	231500073	231503382	16	5_4_1	5	0.865	n/a	/n/a	-
1:231500073|231509845	1	231500073	231509845	5	2_2_0	28	0.263	n/a	/n/a	-
1:231506308|231509845	1	231506308	231509845	70	20_16_6	34	0.805	n/a	/n/a	-
1:231665001|231678357	1	231665001	231678357	6	1_2_0	7	0.632	n/a	/n/a	+
1:231672959|231678357	1	231672959	231678357	69	14_15_3	15	0.902	n/a	/n/a	+
1:231696874|231700426	1	231696874	231700426	8	1_2_0	3	0.842	n/a	/n/a	+
1:232695370|232709968	1	232695370	232709968	4	2_0_2	1	0.889	n/a	/n/a	-
1:233190014|233193036	1	233190014	233193036	27	5_3_4	25	0.684	n/a	/n/a	-
1:233225807|233231609	1	233225807	233231609	29	7_6_5	11	0.841	n/a	/n/a	-
1:233248545|233297109	1	233248545	233297109	11	3_4_3	113	0.163	n/a	/n/a	-
1:233296029|233314921	1	233296029	233314921	10	4_1_0	170	0.105	n/a	/n/a	-
1:233313548|233344435	1	233313548	233344435	28	6_9_2	72	0.438	n/a	/n/a	-
1:233334685|233344435	1	233334685	233344435	9	3_4_1	45	0.286	n/a	/n/a	-
1:233334685|233372726	1	233334685	233372726	12	2_4_1	75	0.242	n/a	/n/a	-
1:233334685|233388534	1	233334685	233388534	4	2_2_0	36	0.182	n/a	/n/a	-
1:233353645|233363117	1	233353645	233363117	21	1_8_9	86	0.328	n/a	/n/a	-
1:233353645|233372726	1	233353645	233372726	47	2_13_11	64	0.595	n/a	/n/a	-
1:233362972|233372726	1	233362972	233372726	2	2_1_0	100	0.038	n/a	/n/a	-
1:233371826|233372726	1	233371826	233372726	4	0_2_2	48	0.143	n/a	/n/a	-
1:233372591|233388534	1	233372591	233388534	8	3_2_0	79	0.168	n/a	/n/a	-
1:233388100|233398868	1	233388100	233398868	4	2_2_0	46	0.148	n/a	/n/a	-
1:233482188|233490757	1	233482188	233490757	71	24_20_3	26	0.845	n/a	/n/a	+
1:233482188|233498039	1	233482188	233498039	13	5_5_0	10	0.722	n/a	/n/a	+
1:233802341|233807135	1	233802341	233807135	2	2_2_0	59	0.063	n/a	/n/a	+
1:233802341|233807336	1	233802341	233807336	5	1_2_0	28	0.263	n/a	/n/a	+
1:233822363|233822650	1	233822363	233822650	10	5_5_0	0	1	n/a	/n/a	-
1:233935680|233957223	1	233935680	233957223	7	2_2_0	5	0.737	n/a	/n/a	+
1:234269090|234276052	1	234269090	234276052	4	2_1_0	4	0.667	n/a	/n/a	+
1:234342395|234342788	1	234342395	234342788	7	2_2_0	4	0.778	n/a	/n/a	+
1:234342395|234367487	1	234342395	234367487	5	1_1_1	7	0.588	n/a	/n/a	+
1:234553830|234563512	1	234553830	234563512	9	2_3_0	17	0.514	n/a	/n/a	-
1:234586174|234608557	1	234586174	234608557	4	2_2_0	15	0.348	n/a	/n/a	-
1:234593413|234603396	1	234593413	234603396	7	2_3_0	64	0.179	n/a	/n/a	-
1:234593413|234608557	1	234593413	234608557	13	3_5_3	38	0.406	n/a	/n/a	-
1:234599583|234608557	1	234599583	234608557	11	3_0_2	8	0.733	n/a	/n/a	-
1:234601402|234608557	1	234601402	234608557	12	1_1_4	39	0.381	n/a	/n/a	-
1:234765355|234786924	1	234765355	234786924	3	2_0_1	0	1	n/a	/n/a	+
1:235316021|235318427	1	235316021	235318427	11	1_2_2	61	0.265	n/a	/n/a	-
1:235403628|235409826	1	235403628	235409826	3	2_1_0	23	0.207	n/a	/n/a	-
1:235403628|235416124	1	235403628	235416124	4	2_2_0	18	0.308	n/a	/n/a	-
1:235416045|235424067	1	235416045	235424067	5	1_2_1	19	0.345	n/a	/n/a	-
1:235505023|235506198	1	235505023	235506198	14	1_2_4	6	0.824	n/a	/n/a	+
1:235577748|235590554	1	235577748	235590554	5	2_2_0	83	0.108	n/a	/n/a	+
1:235582732|235597595	1	235582732	235597595	24	8_3_5	18	0.727	n/a	/n/a	+
1:235582788|235594119	1	235582788	235594119	16	3_6_3	94	0.254	n/a	/n/a	+
1:235582788|235597595	1	235582788	235597595	38	7_5_12	36	0.679	n/a	/n/a	+
1:235590455|235597595	1	235590455	235597595	5	2_0_3	105	0.087	n/a	/n/a	+
1:235599060|235599923	1	235599060	235599923	8	1_1_2	45	0.262	n/a	/n/a	+
1:235600637|235602237	1	235600637	235602237	9	2_2_0	52	0.257	n/a	/n/a	+
1:235621911|235634274	1	235621911	235634274	6	2_2_0	47	0.203	n/a	/n/a	-
1:235628953|235658138	1	235628953	235658138	12	3_5_2	89	0.212	n/a	/n/a	-
1:235634164|235658138	1	235634164	235658138	5	2_1_1	101	0.09	n/a	/n/a	-
1:235634164|235659618	1	235634164	235659618	8	2_2_0	28	0.364	n/a	/n/a	-
1:235643370|235647831	1	235643370	235647831	8	3_3_1	111	0.126	n/a	/n/a	-
1:235643370|235652573	1	235643370	235652573	3	2_1_1	181	0.032	n/a	/n/a	-
1:235643370|235658138	1	235643370	235658138	75	11_22_9	120	0.556	n/a	/n/a	-
1:235643370|235659618	1	235643370	235659618	14	3_2_1	47	0.373	n/a	/n/a	-
1:235647638|235658138	1	235647638	235658138	8	4_4_1	186	0.079	n/a	/n/a	-
1:235657991|235659618	1	235657991	235659618	5	3_3_2	141	0.066	n/a	/n/a	-
1:235840391|235860572	1	235840391	235860572	10	3_4_0	1	0.952	n/a	/n/a	-
1:235850249|235860572	1	235850249	235860572	4	2_3_1	5	0.615	n/a	/n/a	-
1:235993526|235996967	1	235993526	235996967	15	6_5_2	19	0.612	n/a	/n/a	-
1:236332006|236341936	1	236332006	236341936	9	1_3_2	77	0.189	n/a	/n/a	+
1:236332006|236343328	1	236332006	236343328	10	1_2_2	75	0.211	n/a	/n/a	+
1:236332006|236347206	1	236332006	236347206	25	2_7_9	20	0.714	n/a	/n/a	+
1:236332006|236368550	1	236332006	236368550	9	0_2_3	6	0.75	n/a	/n/a	+
1:236717898|236718764	1	236717898	236718764	5	2_2_0	44	0.185	n/a	/n/a	-
1:236754147|236755933	1	236754147	236755933	3	2_1_1	10	0.375	n/a	/n/a	-
1:236966728|236969533	1	236966728	236969533	7	2_2_2	66	0.175	n/a	/n/a	+
1:236966731|236979843	1	236966731	236979843	2	2_0_1	44	0.083	n/a	/n/a	+
1:236969444|236979843	1	236969444	236979843	22	4_5_7	44	0.5	n/a	/n/a	+
1:236972004|236979843	1	236972004	236979843	6	1_2_3	32	0.273	n/a	/n/a	+
1:237013644|237016388	1	237013644	237016388	23	8_9_0	17	0.73	n/a	/n/a	+
1:237023133|237026854	1	237023133	237026854	19	1_4_8	6	0.864	n/a	/n/a	+
1:241936094|241938512	1	241936094	241938512	3	2_2_0	0	1	n/a	/n/a	+
1:242029887|242030357	1	242029887	242030357	6	3_1_0	5	0.706	n/a	/n/a	+
1:242045218|242048809	1	242045218	242048809	11	4_4_1	16	0.579	n/a	/n/a	+
1:243362362|243375266	1	243362362	243375266	6	3_1_0	4	0.75	n/a	/n/a	-
1:243375168|243388623	1	243375168	243388623	9	3_2_3	18	0.5	n/a	/n/a	-
1:243385026|243388623	1	243385026	243388623	68	14_21_6	39	0.777	n/a	/n/a	-
1:243456393|243471479	1	243456393	243471479	2	2_2_0	3	0.571	n/a	/n/a	+
1:243507517|243542165	1	243507517	243542165	2	1_2_0	9	0.308	n/a	/n/a	+
1:243708812|243736350	1	243708812	243736350	2	0_1_2	26	0.133	n/a	/n/a	-
1:243716031|243736350	1	243716031	243736350	6	2_1_1	35	0.255	n/a	/n/a	-
1:243727022|243801044	1	243727022	243801044	14	1_1_1	38	0.424	n/a	/n/a	-
1:243776973|243828185	1	243776973	243828185	10	1_2_1	36	0.357	n/a	/n/a	-
1:244582062|244583598	1	244582062	244583598	2	1_1_1	24	0.143	n/a	/n/a	-
1:244620795|244643086	1	244620795	244643086	5	0_1_2	11	0.476	n/a	/n/a	+
1:244639459|244643086	1	244639459	244643086	7	1_0_2	11	0.56	n/a	/n/a	+
1:244715624|244724447	1	244715624	244724447	12	7_6_0	0	1	n/a	/n/a	+
1:245006437|245012158	1	245006437	245012158	16	0_2_4	7	0.821	n/a	/n/a	-
1:245165423|245180628	1	245165423	245180628	50	16_10_13	47	0.68	n/a	/n/a	+
1:245165423|245185598	1	245165423	245185598	18	3_4_3	19	0.655	n/a	/n/a	+
1:245165423|245191336	1	245165423	245191336	3	1_1_1	12	0.333	n/a	/n/a	+
1:245165423|245222760	1	245165423	245222760	12	4_3_3	51	0.32	n/a	/n/a	+
1:245180544|245222760	1	245180544	245222760	21	6_2_6	77	0.353	n/a	/n/a	+
1:245180544|245246990	1	245180544	245246990	15	1_2_4	51	0.37	n/a	/n/a	+
1:245222688|245246990	1	245222688	245246990	9	4_1_5	29	0.383	n/a	/n/a	+
1:246078622|246078942	1	246078622	246078942	5	1_2_0	46	0.179	n/a	/n/a	-
1:246078832|246093239	1	246078832	246093239	22	4_3_5	64	0.407	n/a	/n/a	-
1:246091233|246093239	1	246091233	246093239	19	4_1_2	82	0.317	n/a	/n/a	-
1:246350045|246370761	1	246350045	246370761	8	1_1_3	20	0.444	n/a	/n/a	-
1:246437607|246490639	1	246437607	246490639	3	0_3_3	93	0.061	n/a	/n/a	-
1:246490503|246493839	1	246490503	246493839	5	1_0_3	102	0.089	n/a	/n/a	-
1:246490503|246498776	1	246490503	246498776	192	42_22_17	33	0.921	n/a	/n/a	-
1:246490503|246518396	1	246490503	246518396	16	7_1_6	37	0.464	n/a	/n/a	-
1:246498669|246553508	1	246498669	246553508	4	2_2_0	51	0.136	n/a	/n/a	-
1:246518333|246531394	1	246518333	246531394	4	0_2_2	17	0.32	n/a	/n/a	-
1:246518333|246603426	1	246518333	246603426	9	2_3_3	50	0.265	n/a	/n/a	-
1:246599247|246600809	1	246599247	246600809	11	1_1_2	117	0.158	n/a	/n/a	-
1:246599247|246603426	1	246599247	246603426	13	4_4_6	37	0.413	n/a	/n/a	-
1:246599247|246644611	1	246599247	246644611	5	1_1_2	8	0.556	n/a	/n/a	-
1:246600450|246603426	1	246600450	246603426	96	6_20_27	39	0.831	n/a	/n/a	-
1:246600450|246604601	1	246600450	246604601	5	1_1_2	10	0.5	n/a	/n/a	-
1:246670356|246835919	1	246670356	246835919	16	6_5_1	12	0.727	n/a	/n/a	-
1:246704240|246714604	1	246704240	246714604	6	2_0_3	3	0.8	n/a	/n/a	-
1:246711847|246720023	1	246711847	246720023	6	1_2_2	11	0.522	n/a	/n/a	-
1:246754814|246755243	1	246754814	246755243	29	6_10_1	13	0.817	n/a	/n/a	+
1:246784731|246797889	1	246784731	246797889	27	6_5_3	20	0.73	n/a	/n/a	+
1:246794661|246795226	1	246794661	246795226	2	1_1_1	16	0.2	n/a	/n/a	+
1:246890194|246903603	1	246890194	246903603	87	14_17_11	28	0.861	n/a	/n/a	+
1:246890194|246907427	1	246890194	246907427	34	12_2_17	28	0.708	n/a	/n/a	+
1:246899277|246903603	1	246899277	246903603	7	2_2_1	131	0.097	n/a	/n/a	+
1:246899277|246907427	1	246899277	246907427	8	2_0_3	132	0.108	n/a	/n/a	+
1:247039339|247040604	1	247039339	247040604	2	2_0_1	2	0.667	n/a	/n/a	-
1:247302018|247323115	1	247302018	247323115	326	6_42_73	190	0.774	n/a	/n/a	-
1:247318868|247323115	1	247318868	247323115	1506	81_79_66	203	0.937	n/a	/n/a	-
1:247318868|247323169	1	247318868	247323169	3	1_0_2	34	0.15	n/a	/n/a	-
1:247319708|247323115	1	247319708	247323115	266	44_44_11	205	0.722	n/a	/n/a	-
1:247320134|247323115	1	247320134	247323115	9	3_3_1	627	0.028	n/a	/n/a	-
1:247320302|247323115	1	247320302	247323115	718	75_74_35	512	0.737	n/a	/n/a	-
1:247320386|247323115	1	247320386	247323115	42	16_13_0	672	0.111	n/a	/n/a	-
1:247322308|247323097	1	247322308	247323097	24	4_7_10	1276	0.036	n/a	/n/a	-
1:247322308|247323115	1	247322308	247323115	170	16_33_38	1172	0.225	n/a	/n/a	-
10:225934|255988	10	225934	255988	40	11_13_2	64	0.556	n/a	/n/a	+
10:225934|267296	10	225934	267296	63	16_19_3	23	0.846	n/a	/n/a	+
10:255829|267296	10	255829	267296	2	2_1_0	71	0.053	n/a	/n/a	+
10:454866|468973	10	454866	468973	4	0_1_2	48	0.143	n/a	/n/a	-
10:465005|468973	10	465005	468973	4	1_2_0	67	0.107	n/a	/n/a	-
10:465005|486936	10	465005	486936	6	4_3_0	178	0.063	n/a	/n/a	-
10:465005|518489	10	465005	518489	8	3_3_0	97	0.142	n/a	/n/a	-
10:468764|518489	10	468764	518489	8	2_2_0	92	0.148	n/a	/n/a	-
10:468764|532470	10	468764	532470	9	2_2_0	45	0.286	n/a	/n/a	-
10:486811|518489	10	486811	518489	63	18_18_2	120	0.512	n/a	/n/a	-
10:486811|532470	10	486811	532470	65	15_5_15	73	0.64	n/a	/n/a	-
10:518379|532470	10	518379	532470	35	8_5_9	166	0.297	n/a	/n/a	-
10:530721|532470	10	530721	532470	103	19_6_23	51	0.802	n/a	/n/a	-
10:882343|890995	10	882343	890995	17	2_6_6	12	0.739	n/a	/n/a	-
10:909683|910210	10	909683	910210	28	7_6_0	105	0.348	n/a	/n/a	-
10:909683|931700	10	909683	931700	34	10_9_5	38	0.642	n/a	/n/a	-
10:930387|931700	10	930387	931700	3	1_2_1	115	0.05	n/a	/n/a	-
10:930387|934997	10	930387	934997	4	0_1_2	94	0.078	n/a	/n/a	-
10:930387|936769	10	930387	936769	14	1_2_3	94	0.23	n/a	/n/a	-
10:1046617|1053068	10	1046617	1053068	2	1_0_2	26	0.133	n/a	/n/a	+
10:1118056|1123943	10	1118056	1123943	7	3_1_2	19	0.424	n/a	/n/a	+
10:1125951|1126416	10	1125951	1126416	10	4_2_3	35	0.364	n/a	/n/a	+
10:1130343|1142186	10	1130343	1142186	90	14_1_28	60	0.75	n/a	/n/a	+
10:1130343|1151207	10	1130343	1151207	9	1_2_0	38	0.321	n/a	/n/a	+
10:1149539|1151207	10	1149539	1151207	12	5_4_1	34	0.414	n/a	/n/a	+
10:1149542|1151207	10	1149542	1151207	13	5_5_1	34	0.433	n/a	/n/a	+
10:3160974|3162236	10	3160974	3162236	4	2_2_0	59	0.119	n/a	/n/a	+
10:5751493|5754881	10	5751493	5754881	11	2_2_3	36	0.379	n/a	/n/a	+
10:5751493|5756170	10	5751493	5756170	62	16_6_15	7	0.947	n/a	/n/a	+
10:5754357|5756170	10	5754357	5756170	8	3_1_1	29	0.356	n/a	/n/a	+
10:5810176|5842668	10	5810176	5842668	2	1_1_1	34	0.105	n/a	/n/a	-
10:5815805|5842668	10	5815805	5842668	119	22_19_13	34	0.875	n/a	/n/a	-
10:5827105|5842668	10	5827105	5842668	85	28_24_9	56	0.752	n/a	/n/a	-
10:5827815|5842668	10	5827815	5842668	20	7_4_1	103	0.28	n/a	/n/a	-
10:5836848|5842668	10	5836848	5842668	76	14_12_5	149	0.505	n/a	/n/a	-
10:5838726|5842668	10	5838726	5842668	7	2_2_0	165	0.078	n/a	/n/a	-
10:6854212|6879970	10	6854212	6879970	6	2_0_2	9	0.571	n/a	/n/a	+
10:6863749|6879970	10	6863749	6879970	9	1_0_3	11	0.621	n/a	/n/a	+
10:6875605|6879970	10	6875605	6879970	4	1_0_2	13	0.381	n/a	/n/a	+
10:6875605|6880164	10	6875605	6880164	17	2_7_5	9	0.791	n/a	/n/a	+
10:6875605|6880382	10	6875605	6880382	4	0_2_2	4	0.667	n/a	/n/a	+
10:7230586|7247890	10	7230586	7247890	6	1_1_2	8	0.6	n/a	/n/a	-
10:7262373|7269899	10	7262373	7269899	28	7_3_9	100	0.359	n/a	/n/a	-
10:7262373|7290611	10	7262373	7290611	10	2_2_1	119	0.144	n/a	/n/a	-
10:7262373|7318951	10	7262373	7318951	15	7_6_0	133	0.184	n/a	/n/a	-
10:7262373|7327916	10	7262373	7327916	25	13_8_2	80	0.385	n/a	/n/a	-
10:7269817|7327916	10	7269817	7327916	4	1_0_2	196	0.039	n/a	/n/a	-
10:7285520|7290611	10	7285520	7290611	10	3_3_1	186	0.097	n/a	/n/a	-
10:7285520|7318951	10	7285520	7318951	11	5_3_1	205	0.097	n/a	/n/a	-
10:7285520|7327916	10	7285520	7327916	162	37_25_21	153	0.679	n/a	/n/a	-
10:7290510|7327916	10	7290510	7327916	22	4_3_7	188	0.19	n/a	/n/a	-
10:7318854|7327916	10	7318854	7327916	664	46_42_76	204	0.867	n/a	/n/a	-
10:7325866|7327916	10	7325866	7327916	8	1_2_2	188	0.078	n/a	/n/a	-
10:7409611|7412337	10	7409611	7412337	6	3_2_0	20	0.375	n/a	/n/a	-
10:7839010|7844817	10	7839010	7844817	25	7_6_4	20	0.714	n/a	/n/a	+
10:7844233|7844817	10	7844233	7844817	5	2_2_0	35	0.222	n/a	/n/a	+
10:11523769|11527910	10	11523769	11527910	15	4_1_5	16	0.652	n/a	/n/a	-
10:11639630|11643979	10	11639630	11643979	8	2_1_3	14	0.533	n/a	/n/a	-
10:11789348|11791591	10	11789348	11791591	4	1_0_2	190	0.04	n/a	/n/a	+
10:11789348|11797607	10	11789348	11797607	20	7_7_1	24	0.625	n/a	/n/a	+
10:11893996|11894214	10	11893996	11894214	68	22_22_2	176	0.436	n/a	/n/a	+
10:11908530|11908782	10	11908530	11908782	3	1_2_0	253	0.023	n/a	/n/a	+
10:11971864|11978711	10	11971864	11978711	2	2_2_0	0	1	n/a	/n/a	-
10:12009340|12021164	10	12009340	12021164	2	1_0_2	11	0.267	n/a	/n/a	-
10:12039671|12056183	10	12039671	12056183	12	1_2_4	23	0.511	n/a	/n/a	-
10:12123471|12126750	10	12123471	12126750	13	6_6_0	82	0.241	n/a	/n/a	+
10:12123471|12133683	10	12123471	12133683	13	3_3_1	29	0.473	n/a	/n/a	+
10:12123471|12136270	10	12123471	12136270	12	4_4_0	26	0.48	n/a	/n/a	+
10:12148245|12150014	10	12148245	12150014	6	2_1_1	31	0.279	n/a	/n/a	+
10:12159672|12162266	10	12159672	12162266	15	5_2_5	65	0.316	n/a	/n/a	+
10:12160748|12162266	10	12160748	12162266	10	4_4_3	71	0.22	n/a	/n/a	+
10:12251966|12259466	10	12251966	12259466	18	2_5_4	207	0.148	n/a	/n/a	+
10:12257739|12280484	10	12257739	12280484	76	17_0_27	192	0.442	n/a	/n/a	+
10:12259360|12280484	10	12259360	12280484	5	2_0_2	270	0.036	n/a	/n/a	+
10:12272947|12280484	10	12272947	12280484	27	3_1_9	301	0.152	n/a	/n/a	+
10:12291580|12292468	10	12291580	12292468	9	2_2_0	179	0.091	n/a	/n/a	+
10:12431870|12445368	10	12431870	12445368	6	1_2_0	21	0.364	n/a	/n/a	+
10:12439268|12445368	10	12439268	12445368	5	0_2_1	23	0.303	n/a	/n/a	+
10:12442015|12445368	10	12442015	12445368	75	23_22_1	24	0.862	n/a	/n/a	+
10:12442720|12445368	10	12442720	12445368	36	11_10_0	84	0.462	n/a	/n/a	+
10:12708735|12811798	10	12708735	12811798	3	1_2_1	13	0.316	n/a	/n/a	+
10:12802947|12811798	10	12802947	12811798	15	3_4_5	28	0.517	n/a	/n/a	+
10:12833157|12858327	10	12833157	12858327	6	2_0_3	15	0.444	n/a	/n/a	+
10:12856194|12858327	10	12856194	12858327	16	6_2_5	17	0.653	n/a	/n/a	+
10:13214376|13214765	10	13214376	13214765	5	2_2_0	4	0.714	n/a	/n/a	+
10:13233299|13234568	10	13233299	13234568	6	1_1_1	14	0.462	n/a	/n/a	+
10:13322976|13337606	10	13322976	13337606	4	2_2_0	118	0.063	n/a	/n/a	-
10:13333831|13337606	10	13333831	13337606	7	1_1_4	687	0.02	n/a	/n/a	-
10:13333831|13340245	10	13333831	13340245	11	1_1_5	639	0.033	n/a	/n/a	-
10:13336428|13337606	10	13336428	13337606	10	3_2_0	950	0.021	n/a	/n/a	-
10:13375817|13378350	10	13375817	13378350	5	1_3_0	20	0.333	n/a	/n/a	-
10:14572331|14572514	10	14572331	14572514	3	1_2_1	12	0.333	n/a	/n/a	-
10:14572331|14595386	10	14572331	14595386	8	2_1_1	8	0.667	n/a	/n/a	-
10:14867478|14870271	10	14867478	14870271	2	1_2_0	0	1	n/a	/n/a	-
10:14896124|14897942	10	14896124	14897942	5	2_2_0	8	0.556	n/a	/n/a	+
10:14938845|14939516	10	14938845	14939516	5	2_3_0	5	0.667	n/a	/n/a	+
10:14964980|14970151	10	14964980	14970151	5	2_1_1	0	1	n/a	/n/a	-
10:14976379|14977563	10	14976379	14977563	6	3_2_0	11	0.522	n/a	/n/a	-
10:14978537|14987188	10	14978537	14987188	6	0_3_3	21	0.364	n/a	/n/a	-
10:15290638|15326104	10	15290638	15326104	4	2_2_0	12	0.4	n/a	/n/a	-
10:15317854|15326104	10	15317854	15326104	11	3_4_4	22	0.5	n/a	/n/a	-
10:15824154|15838171	10	15824154	15838171	5	0_2_2	25	0.286	n/a	/n/a	-
10:15838099|15889942	10	15838099	15889942	9	1_2_5	18	0.5	n/a	/n/a	-
10:15858834|15885271	10	15858834	15885271	48	8_4_16	91	0.513	n/a	/n/a	-
10:15858834|15889942	10	15858834	15889942	145	6_13_38	26	0.918	n/a	/n/a	-
10:15863655|15889942	10	15863655	15889942	9	0_1_3	36	0.333	n/a	/n/a	-
10:15875629|15889942	10	15875629	15889942	84	4_4_23	84	0.667	n/a	/n/a	-
10:15879203|15889942	10	15879203	15889942	6	3_2_1	214	0.053	n/a	/n/a	-
10:16794538|16796988	10	16794538	16796988	4	1_1_1	34	0.19	n/a	/n/a	-
10:16794538|16824083	10	16794538	16824083	19	3_1_7	10	0.792	n/a	/n/a	-
10:17199440|17210916	10	17199440	17210916	21	7_2_8	4	0.913	n/a	/n/a	-
10:17632345|17646046	10	17632345	17646046	11	2_2_1	32	0.407	n/a	/n/a	-
10:17636204|17646046	10	17636204	17646046	29	7_7_3	41	0.586	n/a	/n/a	-
10:17645559|17646046	10	17645559	17646046	48	8_13_13	40	0.706	n/a	/n/a	-
10:17746430|17747740	10	17746430	17747740	5	2_2_0	24	0.294	n/a	/n/a	+
10:18898774|18905222	10	18898774	18905222	6	2_2_2	10	0.545	n/a	/n/a	-
10:18955504|18957606	10	18955504	18957606	17	1_9_5	12	0.739	n/a	/n/a	+
10:21076131|21101869	10	21076131	21101869	5	1_1_1	9	0.526	n/a	/n/a	-
10:21169723|21188379	10	21169723	21188379	2	0_1_2	4	0.5	n/a	/n/a	-
10:21234267|21250708	10	21234267	21250708	5	1_1_1	21	0.323	n/a	/n/a	-
10:21860904|21884369	10	21860904	21884369	4	1_1_1	9	0.471	n/a	/n/a	+
10:21884260|21906136	10	21884260	21906136	6	2_1_1	19	0.387	n/a	/n/a	+
10:21928432|21940697	10	21928432	21940697	4	2_1_0	11	0.421	n/a	/n/a	+
10:21940602|21959633	10	21940602	21959633	10	0_4_3	20	0.5	n/a	/n/a	+
10:21970261|22002879	10	21970261	22002879	8	1_3_1	40	0.286	n/a	/n/a	+
10:21970261|22016857	10	21970261	22016857	5	0_1_3	15	0.4	n/a	/n/a	+
10:22002701|22016857	10	22002701	22016857	38	13_4_8	19	0.8	n/a	/n/a	+
10:22193451|22218070	10	22193451	22218070	5	2_1_0	2	0.833	n/a	/n/a	-
10:22839588|22862386	10	22839588	22862386	2	2_2_0	31	0.114	n/a	/n/a	-
10:24908402|24924032	10	24908402	24924032	9	2_2_1	13	0.581	n/a	/n/a	-
10:24918925|24924032	10	24918925	24924032	26	3_8_3	11	0.825	n/a	/n/a	-
10:25226113|25231365	10	25226113	25231365	29	12_9_4	22	0.725	n/a	/n/a	-
10:27054147|27059274	10	27054147	27059274	7	3_2_1	50	0.219	n/a	/n/a	-
10:27328894|27332496	10	27328894	27332496	3	1_2_0	1	0.857	n/a	/n/a	-
10:27349274|27350171	10	27349274	27350171	6	2_2_2	2	0.857	n/a	/n/a	-
10:27356086|27368090	10	27356086	27368090	5	2_2_0	13	0.435	n/a	/n/a	-
10:27381335|27387252	10	27381335	27387252	2	2_1_0	2	0.667	n/a	/n/a	-
10:27420788|27425314	10	27420788	27425314	13	2_2_6	19	0.578	n/a	/n/a	-
10:27422968|27425314	10	27422968	27425314	5	0_1_2	38	0.208	n/a	/n/a	-
10:27431316|27434519	10	27431316	27434519	37	8_11_5	41	0.643	n/a	/n/a	-
10:27447478|27454468	10	27447478	27454468	4	2_3_0	8	0.5	n/a	/n/a	+
10:27453993|27454468	10	27453993	27454468	11	3_4_0	4	0.846	n/a	/n/a	+
10:27469882|27470510	10	27469882	27470510	11	5_3_2	7	0.759	n/a	/n/a	+
10:27815757|27822923	10	27815757	27822923	16	1_4_6	23	0.582	n/a	/n/a	+
10:27821436|27822923	10	27821436	27822923	35	8_2_15	28	0.714	n/a	/n/a	+
10:27855761|27867642	10	27855761	27867642	17	2_5_3	5	0.872	n/a	/n/a	+
10:28023385|28024303	10	28023385	28024303	18	6_5_0	3	0.923	n/a	/n/a	-
10:28023385|28032426	10	28023385	28032426	4	2_2_0	39	0.17	n/a	/n/a	-
10:28149554|28151551	10	28149554	28151551	6	1_2_0	3	0.8	n/a	/n/a	-
10:28196592|28229734	10	28196592	28229734	8	2_2_1	12	0.571	n/a	/n/a	-
10:28196592|28233891	10	28196592	28233891	3	2_2_0	6	0.5	n/a	/n/a	-
10:28223939|28225809	10	28223939	28225809	7	3_3_0	28	0.333	n/a	/n/a	-
10:28358701|28378770	10	28358701	28378770	18	5_5_2	13	0.735	n/a	/n/a	-
10:28420489|28438988	10	28420489	28438988	22	6_1_6	17	0.721	n/a	/n/a	-
10:28872328|28879761	10	28872328	28879761	30	10_11_6	48	0.556	n/a	/n/a	+
10:29751206|29752564	10	29751206	29752564	4	2_2_0	13	0.381	n/a	/n/a	-
10:30066092|30077354	10	30066092	30077354	5	2_2_0	3	0.769	n/a	/n/a	-
10:30736711|30740673	10	30736711	30740673	19	8_4_1	33	0.535	n/a	/n/a	+
10:30739187|30739448	10	30739187	30739448	8	2_3_1	28	0.364	n/a	/n/a	+
10:30739187|30740673	10	30739187	30740673	10	5_2_4	32	0.385	n/a	/n/a	+
10:31165927|31230580	10	31165927	31230580	4	0_1_2	16	0.333	n/a	/n/a	-
10:31644073|31647262	10	31644073	31647262	10	1_3_4	1	0.952	n/a	/n/a	+
10:31644073|31676195	10	31644073	31676195	16	1_5_2	17	0.653	n/a	/n/a	+
10:31644076|31676195	10	31644076	31676195	4	0_2_2	17	0.32	n/a	/n/a	+
10:31661947|31676195	10	31661947	31676195	10	6_5_1	17	0.541	n/a	/n/a	+
10:31661947|31676727	10	31661947	31676727	8	3_1_1	2	0.889	n/a	/n/a	+
10:31662051|31676727	10	31662051	31676727	4	1_0_2	21	0.276	n/a	/n/a	+
10:31749966|31750166	10	31749966	31750166	6	3_2_0	1	0.923	n/a	/n/a	+
10:32197100|32197854	10	32197100	32197854	9	3_3_1	287	0.059	n/a	/n/a	-
10:32197100|32199491	10	32197100	32199491	487	71_8_86	130	0.882	n/a	/n/a	-
10:32197100|32211888	10	32197100	32211888	6	1_1_1	119	0.092	n/a	/n/a	-
10:32309950|32310215	10	32309950	32310215	5	2_0_3	4	0.714	n/a	/n/a	-
10:32326182|32329385	10	32326182	32329385	8	1_1_1	22	0.421	n/a	/n/a	-
10:32337392|32339451	10	32337392	32339451	5	0_2_2	7	0.588	n/a	/n/a	-
10:32740520|32742364	10	32740520	32742364	4	2_0_1	9	0.471	n/a	/n/a	+
10:32740520|32762951	10	32740520	32762951	8	3_0_3	40	0.286	n/a	/n/a	+
10:32740520|32770710	10	32740520	32770710	8	3_3_0	6	0.727	n/a	/n/a	+
10:32759992|32762951	10	32759992	32762951	19	7_1_5	42	0.475	n/a	/n/a	+
10:32832228|32873232	10	32832228	32873232	6	1_1_2	9	0.571	n/a	/n/a	+
10:32860787|32912745	10	32860787	32912745	5	0_1_2	9	0.526	n/a	/n/a	+
10:33217022|33224486	10	33217022	33224486	4	1_0_2	138	0.055	n/a	/n/a	-
10:33542956|33552801	10	33542956	33552801	3	2_2_0	58	0.094	n/a	/n/a	-
10:34558585|34573173	10	34558585	34573173	26	10_10_3	17	0.754	n/a	/n/a	-
10:34620045|34649187	10	34620045	34649187	5	2_2_0	15	0.4	n/a	/n/a	-
10:34648075|34649187	10	34648075	34649187	7	3_2_1	12	0.538	n/a	/n/a	-
10:34663802|34673182	10	34663802	34673182	4	1_1_1	10	0.444	n/a	/n/a	-
10:34739245|34806087	10	34739245	34806087	4	3_1_0	31	0.205	n/a	/n/a	-
10:34759013|34806087	10	34759013	34806087	29	10_10_1	41	0.586	n/a	/n/a	-
10:34782214|34806087	10	34782214	34806087	4	2_2_1	29	0.216	n/a	/n/a	-
10:34805907|34834216	10	34805907	34834216	7	1_2_0	35	0.286	n/a	/n/a	-
10:34985246|34989132	10	34985246	34989132	14	3_6_1	13	0.683	n/a	/n/a	-
10:34985246|35068870	10	34985246	35068870	3	2_1_1	15	0.286	n/a	/n/a	-
10:35349802|35360267	10	35349802	35360267	32	8_10_4	8	0.889	n/a	/n/a	-
10:35772332|35805551	10	35772332	35805551	4	2_2_0	89	0.082	n/a	/n/a	+
10:35790429|35819171	10	35790429	35819171	9	1_3_2	121	0.129	n/a	/n/a	+
10:35805451|35819171	10	35805451	35819171	8	3_3_1	136	0.105	n/a	/n/a	+
10:35818901|35842113	10	35818901	35842113	6	0_2_2	228	0.05	n/a	/n/a	+
10:43127377|43127887	10	43127377	43127887	4	2_2_0	37	0.178	n/a	/n/a	-
10:43127377|43132420	10	43127377	43132420	10	6_0_4	19	0.513	n/a	/n/a	-
10:43287075|43289439	10	43287075	43289439	7	2_2_0	9	0.609	n/a	/n/a	+
10:43654163|43662546	10	43654163	43662546	3	2_2_0	2	0.75	n/a	/n/a	+
10:43654163|43671480	10	43654163	43671480	11	3_3_1	1	0.957	n/a	/n/a	+
10:43659314|43671480	10	43659314	43671480	7	2_1_0	29	0.326	n/a	/n/a	+
10:46028558|46037790	10	46028558	46037790	2	2_2_0	27	0.129	n/a	/n/a	-
10:46028558|46048652	10	46028558	46048652	6	4_1_1	41	0.226	n/a	/n/a	-
10:46135264|46159290	10	46135264	46159290	9	4_5_0	5	0.783	n/a	/n/a	-
10:46158028|46159290	10	46158028	46159290	24	4_7_0	6	0.889	n/a	/n/a	-
10:46158990|46159290	10	46158990	46159290	107	28_27_2	23	0.903	n/a	/n/a	-
10:46248036|46248685	10	46248036	46248685	3	1_0_2	18	0.25	n/a	/n/a	+
10:47072857|47099714	10	47072857	47099714	7	2_1_1	46	0.233	n/a	/n/a	-
10:47099291|47121263	10	47099291	47121263	4	1_1_1	28	0.222	n/a	/n/a	-
10:47121121|47122996	10	47121121	47122996	9	3_3_1	16	0.529	n/a	/n/a	-
10:49533940|49613024	10	49533940	49613024	4	1_1_1	235	0.033	n/a	/n/a	+
10:49533940|49618211	10	49533940	49618211	3	2_2_0	65	0.085	n/a	/n/a	+
10:49609655|49613024	10	49609655	49613024	42	12_15_1	266	0.24	n/a	/n/a	+
10:49609655|49618211	10	49609655	49618211	128	40_30_2	93	0.734	n/a	/n/a	+
10:50701163|50714058	10	50701163	50714058	28	11_6_1	23	0.709	n/a	/n/a	-
10:51035448|51040954	10	51035448	51040954	10	2_4_1	22	0.476	n/a	/n/a	-
10:51040849|51051678	10	51040849	51051678	16	3_2_3	45	0.416	n/a	/n/a	-
10:51040849|51073427	10	51040849	51073427	4	2_0_1	23	0.258	n/a	/n/a	-
10:51579128|51581378	10	51579128	51581378	24	5_0_7	39	0.552	n/a	/n/a	+
10:52066604|52071175	10	52066604	52071175	18	8_6_1	32	0.529	n/a	/n/a	-
10:52100147|52104105	10	52100147	52104105	9	1_3_4	6	0.75	n/a	/n/a	-
10:52103252|52104105	10	52103252	52104105	32	8_8_0	11	0.853	n/a	/n/a	-
10:52193236|52220574	10	52193236	52220574	4	1_1_1	100	0.074	n/a	/n/a	-
10:52193236|52226692	10	52193236	52226692	9	1_1_5	74	0.196	n/a	/n/a	-
10:52193236|52350007	10	52193236	52350007	97	16_18_22	18	0.915	n/a	/n/a	-
10:52220433|52350007	10	52220433	52350007	16	6_3_3	103	0.237	n/a	/n/a	-
10:52268394|52350007	10	52268394	52350007	8	4_3_2	18	0.471	n/a	/n/a	-
10:52279591|52350007	10	52279591	52350007	6	3_1_3	106	0.102	n/a	/n/a	-
10:59550188|59613396	10	59550188	59613396	3	0_2_2	0	1	n/a	/n/a	-
10:60347975|60380661	10	60347975	60380661	16	4_1_6	13	0.711	n/a	/n/a	+
10:60374053|60380661	10	60374053	60380661	13	2_1_5	16	0.619	n/a	/n/a	+
10:60374053|60461903	10	60374053	60461903	5	1_0_2	12	0.455	n/a	/n/a	+
10:60380615|60386874	10	60380615	60386874	5	1_1_1	15	0.4	n/a	/n/a	+
10:60549022|60553375	10	60549022	60553375	15	3_4_2	36	0.455	n/a	/n/a	+
10:60549442|60553375	10	60549442	60553375	5	2_2_1	41	0.196	n/a	/n/a	+
10:61564178|61574513	10	61564178	61574513	2	2_2_0	44	0.083	n/a	/n/a	-
10:61564178|61612460	10	61564178	61612460	9	2_2_1	48	0.273	n/a	/n/a	-
10:61572393|61612460	10	61572393	61612460	6	2_2_0	48	0.2	n/a	/n/a	-
10:61592283|61612460	10	61592283	61612460	20	6_5_3	56	0.417	n/a	/n/a	-
10:61592283|61665981	10	61592283	61665981	3	2_1_1	54	0.1	n/a	/n/a	-
10:61608911|61612460	10	61608911	61612460	14	5_3_0	31	0.475	n/a	/n/a	-
10:63432390|63450379	10	63432390	63450379	5	3_2_1	0	1	n/a	/n/a	+
10:63802048|63810759	10	63802048	63810759	6	1_2_1	17	0.414	n/a	/n/a	+
10:63810647|63819054	10	63810647	63819054	6	1_1_1	11	0.522	n/a	/n/a	+
10:63810647|63829556	10	63810647	63829556	6	1_1_3	14	0.462	n/a	/n/a	+
10:64148155|64159552	10	64148155	64159552	24	7_7_0	6	0.889	n/a	/n/a	+
10:64148155|64219556	10	64148155	64219556	4	2_0_2	4	0.667	n/a	/n/a	+
10:64936057|64937616	10	64936057	64937616	11	4_4_0	15	0.595	n/a	/n/a	-
10:64936057|64960437	10	64936057	64960437	2	2_1_0	23	0.148	n/a	/n/a	-
10:64948928|64949206	10	64948928	64949206	7	3_2_1	10	0.583	n/a	/n/a	-
10:64976967|64979743	10	64976967	64979743	7	1_0_3	0	1	n/a	/n/a	-
10:65024411|65214849	10	65024411	65214849	9	0_3_2	12	0.6	n/a	/n/a	-
10:65140078|65140242	10	65140078	65140242	27	9_6_4	92	0.37	n/a	/n/a	-
10:65140078|65164725	10	65140078	65164725	9	5_2_2	20	0.474	n/a	/n/a	-
10:65140078|65169748	10	65140078	65169748	25	8_5_1	17	0.746	n/a	/n/a	-
10:65140078|65214849	10	65140078	65214849	83	22_21_5	19	0.897	n/a	/n/a	-
10:65140078|65229368	10	65140078	65229368	8	4_1_2	16	0.5	n/a	/n/a	-
10:65326098|65359043	10	65326098	65359043	12	2_2_3	40	0.375	n/a	/n/a	+
10:69647175|69648881	10	69647175	69648881	6	3_4_1	82	0.128	n/a	/n/a	+
10:69647175|69651312	10	69647175	69651312	31	4_5_5	52	0.544	n/a	/n/a	+
10:69648640|69651312	10	69648640	69651312	9	4_2_0	46	0.281	n/a	/n/a	+
10:69714352|69748592	10	69714352	69748592	7	3_3_0	170	0.076	n/a	/n/a	-
10:69714352|69773943	10	69714352	69773943	12	4_2_0	64	0.273	n/a	/n/a	-
10:69726440|69752439	10	69726440	69752439	12	5_2_5	254	0.086	n/a	/n/a	-
10:69726440|69773943	10	69726440	69773943	151	31_36_10	111	0.731	n/a	/n/a	-
10:69747800|69773943	10	69747800	69773943	3	1_2_0	24	0.2	n/a	/n/a	-
10:69748420|69750956	10	69748420	69750956	5	1_0_3	320	0.03	n/a	/n/a	-
10:69748420|69752439	10	69748420	69752439	2	2_2_0	326	0.012	n/a	/n/a	-
10:69748420|69773943	10	69748420	69773943	36	13_9_5	190	0.275	n/a	/n/a	-
10:69750661|69773943	10	69750661	69773943	6	2_2_0	123	0.089	n/a	/n/a	-
10:69751956|69773943	10	69751956	69773943	17	5_6_0	229	0.129	n/a	/n/a	-
10:69773783|69793943	10	69773783	69793943	4	2_1_0	180	0.043	n/a	/n/a	-
10:69773783|69804320	10	69773783	69804320	10	3_3_1	170	0.105	n/a	/n/a	-
10:69785303|69797926	10	69785303	69797926	13	4_2_2	60	0.302	n/a	/n/a	-
10:69785303|69804315	10	69785303	69804315	4	2_2_0	44	0.154	n/a	/n/a	-
10:69785303|69804320	10	69785303	69804320	38	14_11_4	44	0.633	n/a	/n/a	-
10:69785303|69826974	10	69785303	69826974	4	1_2_0	24	0.25	n/a	/n/a	-
10:69797850|69804320	10	69797850	69804320	6	2_1_2	51	0.19	n/a	/n/a	-
10:69797850|69826974	10	69797850	69826974	11	0_4_5	34	0.393	n/a	/n/a	-
10:69895216|69909868	10	69895216	69909868	3	1_0_2	51	0.105	n/a	/n/a	+
10:69902697|69905283	10	69902697	69905283	4	2_1_1	170	0.045	n/a	/n/a	+
10:69902697|69909868	10	69902697	69909868	64	17_10_12	118	0.52	n/a	/n/a	+
10:69902697|69918384	10	69902697	69918384	11	3_2_1	95	0.188	n/a	/n/a	+
10:69902697|69935218	10	69902697	69935218	2	1_2_0	96	0.04	n/a	/n/a	+
10:69905232|69918384	10	69905232	69918384	10	0_3_2	129	0.134	n/a	/n/a	+
10:69935080|69955289	10	69935080	69955289	7	2_2_1	50	0.219	n/a	/n/a	+
10:69961586|69966660	10	69961586	69966660	8	2_3_1	53	0.232	n/a	/n/a	+
10:69961586|69970304	10	69961586	69970304	6	2_2_0	56	0.176	n/a	/n/a	+
10:69966527|69970304	10	69966527	69970304	13	3_5_0	46	0.361	n/a	/n/a	+
10:70051767|70066660	10	70051767	70066660	8	0_2_1	2	0.889	n/a	/n/a	-
10:70056023|70066663	10	70056023	70066663	3	1_1_1	31	0.162	n/a	/n/a	-
10:70115110|70123870	10	70115110	70123870	7	1_3_4	2	0.875	n/a	/n/a	-
10:70143555|70145885	10	70143555	70145885	4	2_0_2	5	0.615	n/a	/n/a	-
10:70152895|70154208	10	70152895	70154208	41	3_12_11	17	0.828	n/a	/n/a	-
10:70153832|70154208	10	70153832	70154208	13	2_4_2	20	0.565	n/a	/n/a	-
10:70153832|70161494	10	70153832	70161494	6	0_1_3	7	0.632	n/a	/n/a	-
10:70190193|70190417	10	70190193	70190417	34	8_8_0	16	0.81	n/a	/n/a	-
10:70196768|70204840	10	70196768	70204840	3	2_1_0	11	0.353	n/a	/n/a	-
10:70202674|70204840	10	70202674	70204840	9	3_3_0	24	0.429	n/a	/n/a	-
10:70202674|70210004	10	70202674	70210004	6	2_3_0	26	0.316	n/a	/n/a	-
10:70202674|70229920	10	70202674	70229920	2	2_1_0	64	0.059	n/a	/n/a	-
10:70206053|70225569	10	70206053	70225569	3	1_2_0	182	0.032	n/a	/n/a	-
10:70209785|70229920	10	70209785	70229920	6	2_2_0	75	0.138	n/a	/n/a	-
10:70218861|70229920	10	70218861	70229920	179	35_39_11	64	0.848	n/a	/n/a	-
10:70225424|70229920	10	70225424	70229920	9	3_3_0	266	0.063	n/a	/n/a	-
10:70227880|70229920	10	70227880	70229920	391	60_62_18	244	0.762	n/a	/n/a	-
10:70243177|70248386	10	70243177	70248386	5	2_2_0	52	0.161	n/a	/n/a	-
10:70246901|70248386	10	70246901	70248386	4	0_1_2	72	0.1	n/a	/n/a	-
10:70246901|70253327	10	70246901	70253327	14	3_4_4	122	0.187	n/a	/n/a	-
10:70246901|70266475	10	70246901	70266475	14	2_6_5	46	0.378	n/a	/n/a	-
10:70246901|70276600	10	70246901	70276600	8	1_2_5	31	0.34	n/a	/n/a	-
10:70252889|70276600	10	70252889	70276600	2	0_2_2	65	0.058	n/a	/n/a	-
10:70497602|70502326	10	70497602	70502326	5	0_3_2	37	0.213	n/a	/n/a	+
10:70545893|70546449	10	70545893	70546449	57	12_21_6	7	0.942	n/a	/n/a	+
10:70549467|70549672	10	70549467	70549672	4	2_3_0	19	0.296	n/a	/n/a	+
10:70670824|70673960	10	70670824	70673960	7	2_2_0	0	1	n/a	/n/a	+
10:70693955|70695835	10	70693955	70695835	7	2_0_1	2	0.875	n/a	/n/a	+
10:70696692|70700950	10	70696692	70700950	5	2_2_0	4	0.714	n/a	/n/a	+
10:70696692|70703013	10	70696692	70703013	19	5_2_1	4	0.905	n/a	/n/a	+
10:70723047|70726959	10	70723047	70726959	35	10_12_3	114	0.38	n/a	/n/a	+
10:70723047|70730106	10	70723047	70730106	4	2_2_0	113	0.066	n/a	/n/a	+
10:70725133|70726959	10	70725133	70726959	5	1_1_1	79	0.112	n/a	/n/a	+
10:70733301|70741337	10	70733301	70741337	10	6_0_6	88	0.185	n/a	/n/a	+
10:70764802|70770771	10	70764802	70770771	6	2_2_0	26	0.316	n/a	/n/a	+
10:70765488|70770771	10	70765488	70770771	3	2_1_0	22	0.214	n/a	/n/a	+
10:70768597|70770771	10	70768597	70770771	8	0_1_3	25	0.39	n/a	/n/a	+
10:70892654|70925866	10	70892654	70925866	2	1_0_2	7	0.364	n/a	/n/a	+
10:70915568|70917967	10	70915568	70917967	17	4_4_1	27	0.557	n/a	/n/a	+
10:70945743|70947512	10	70945743	70947512	2	1_2_0	63	0.06	n/a	/n/a	+
10:70945743|70949191	10	70945743	70949191	6	2_2_0	48	0.2	n/a	/n/a	+
10:70945743|70951522	10	70945743	70951522	18	2_3_3	31	0.537	n/a	/n/a	+
10:70958128|70962799	10	70958128	70962799	9	4_3_1	58	0.237	n/a	/n/a	+
10:71243447|71258152	10	71243447	71258152	4	2_1_0	79	0.092	n/a	/n/a	+
10:71912019|71921687	10	71912019	71921687	8	5_3_1	55	0.225	n/a	/n/a	-
10:71917520|71921687	10	71917520	71921687	2	2_0_1	65	0.058	n/a	/n/a	-
10:71964629|71969441	10	71964629	71969441	4	0_2_1	11	0.421	n/a	/n/a	-
10:71966020|71969441	10	71966020	71969441	7	1_3_0	11	0.56	n/a	/n/a	-
10:72099752|72100458	10	72099752	72100458	13	2_5_0	117	0.182	n/a	/n/a	-
10:72604230|72610967	10	72604230	72610967	12	6_4_4	105	0.186	n/a	/n/a	+
10:72604230|72619256	10	72604230	72619256	50	17_17_2	97	0.508	n/a	/n/a	+
10:72610900|72619256	10	72610900	72619256	3	2_2_1	141	0.041	n/a	/n/a	+
10:73737449|73737907	10	73737449	73737907	2	2_1_0	30	0.118	n/a	/n/a	+
10:73887840|73892939	10	73887840	73892939	10	5_5_0	79	0.202	n/a	/n/a	-
10:73887840|73912746	10	73887840	73912746	22	1_7_5	62	0.415	n/a	/n/a	-
10:73887840|73963282	10	73887840	73963282	6	1_1_1	72	0.143	n/a	/n/a	-
10:73912627|73956747	10	73912627	73956747	6	3_3_0	89	0.119	n/a	/n/a	-
10:73921296|73956747	10	73921296	73956747	3	1_2_0	67	0.082	n/a	/n/a	-
10:73956569|73973089	10	73956569	73973089	7	4_4_0	129	0.098	n/a	/n/a	-
10:73963185|73970589	10	73963185	73970589	4	2_0_2	72	0.1	n/a	/n/a	-
10:73970490|73973089	10	73970490	73973089	7	3_4_1	119	0.105	n/a	/n/a	-
10:73983646|73990198	10	73983646	73990198	9	4_2_2	288	0.059	n/a	/n/a	+
10:74100547|74100928	10	74100547	74100928	40	6_10_4	73	0.523	n/a	/n/a	-
10:74234858|74268027	10	74234858	74268027	4	2_1_0	25	0.242	n/a	/n/a	-
10:74267913|74322821	10	74267913	74322821	7	2_2_0	40	0.259	n/a	/n/a	-
10:74293504|74322821	10	74293504	74322821	8	1_2_3	29	0.356	n/a	/n/a	-
10:74310937|74322821	10	74310937	74322821	4	2_2_0	36	0.182	n/a	/n/a	-
10:74468041|74475660	10	74468041	74475660	194	17_12_41	86	0.819	n/a	/n/a	+
10:74468041|74496329	10	74468041	74496329	3	1_0_2	48	0.111	n/a	/n/a	+
10:74468041|74501603	10	74468041	74501603	18	7_8_1	49	0.424	n/a	/n/a	+
10:74468041|74502031	10	74468041	74502031	3	1_0_3	39	0.133	n/a	/n/a	+
10:74468041|74550689	10	74468041	74550689	11	3_0_3	23	0.489	n/a	/n/a	+
10:74468041|74594186	10	74468041	74594186	4	2_0_2	33	0.195	n/a	/n/a	+
10:74474869|74475660	10	74474869	74475660	132	38_36_18	241	0.523	n/a	/n/a	+
10:74474869|74479203	10	74474869	74479203	4	2_0_1	179	0.043	n/a	/n/a	+
10:74474869|74501603	10	74474869	74501603	4	3_2_0	199	0.039	n/a	/n/a	+
10:74474869|74502031	10	74474869	74502031	12	2_1_3	189	0.113	n/a	/n/a	+
10:74474869|74594186	10	74474869	74594186	3	2_1_1	183	0.032	n/a	/n/a	+
10:74496243|74502031	10	74496243	74502031	12	4_5_2	61	0.282	n/a	/n/a	+
10:74501480|74502031	10	74501480	74502031	85	8_11_11	57	0.749	n/a	/n/a	+
10:74549934|74594186	10	74549934	74594186	7	3_1_2	29	0.326	n/a	/n/a	+
10:74594117|74620285	10	74594117	74620285	2	0_1_2	16	0.2	n/a	/n/a	+
10:74666354|74673226	10	74666354	74673226	13	1_3_1	0	1	n/a	/n/a	+
10:74790029|74806859	10	74790029	74806859	9	2_5_2	49	0.269	n/a	/n/a	-
10:74828604|74834673	10	74828604	74834673	3	2_1_0	38	0.136	n/a	/n/a	-
10:74900904|74906119	10	74900904	74906119	4	2_2_0	28	0.222	n/a	/n/a	-
10:74934445|74953351	10	74934445	74953351	10	3_3_1	9	0.69	n/a	/n/a	+
10:74952314|74953351	10	74952314	74953351	7	4_3_1	34	0.292	n/a	/n/a	+
10:75095188|75101339	10	75095188	75101339	6	1_2_0	2	0.857	n/a	/n/a	-
10:75113314|75114593	10	75113314	75114593	2	1_0_2	2	0.667	n/a	/n/a	-
10:75135906|75139712	10	75135906	75139712	3	1_1_2	87	0.065	n/a	/n/a	-
10:75147447|75148172	10	75147447	75148172	3	0_2_2	60	0.091	n/a	/n/a	-
10:75156277|75160615	10	75156277	75160615	10	0_2_5	80	0.2	n/a	/n/a	-
10:75264608|75265184	10	75264608	75265184	9	3_3_0	21	0.462	n/a	/n/a	-
10:75296027|75299351	10	75296027	75299351	4	3_2_0	4	0.667	n/a	/n/a	-
10:75305296|75336119	10	75305296	75336119	4	2_1_0	23	0.258	n/a	/n/a	-
10:75331179|75336119	10	75331179	75336119	10	2_4_2	16	0.556	n/a	/n/a	-
10:75335270|75336119	10	75335270	75336119	6	3_3_0	30	0.286	n/a	/n/a	-
10:75472962|75481262	10	75472962	75481262	4	2_2_0	28	0.222	n/a	/n/a	-
10:75506388|75506762	10	75506388	75506762	22	3_7_2	159	0.217	n/a	/n/a	+
10:75576781|75583842	10	75576781	75583842	17	2_1_4	130	0.207	n/a	/n/a	-
10:75597226|75632841	10	75597226	75632841	9	0_2_3	102	0.15	n/a	/n/a	-
10:75601927|75632841	10	75601927	75632841	3	0_2_2	102	0.056	n/a	/n/a	-
10:75830428|75832610	10	75830428	75832610	3	2_1_0	77	0.072	n/a	/n/a	+
10:75848954|75984349	10	75848954	75984349	14	5_1_4	107	0.207	n/a	/n/a	+
10:75960522|76158337	10	75960522	76158337	2	1_1_2	47	0.078	n/a	/n/a	+
10:76000686|76002791	10	76000686	76002791	12	0_1_5	8	0.75	n/a	/n/a	+
10:76000686|76027473	10	76000686	76027473	4	1_2_1	3	0.727	n/a	/n/a	+
10:76002496|76074503	10	76002496	76074503	2	2_0_1	89	0.043	n/a	/n/a	+
10:76002496|76158337	10	76002496	76158337	22	4_3_4	48	0.478	n/a	/n/a	+
10:76074425|76158337	10	76074425	76158337	68	7_17_17	72	0.654	n/a	/n/a	+
10:76153899|76158337	10	76153899	76158337	7	1_1_2	116	0.108	n/a	/n/a	+
10:76285014|76287851	10	76285014	76287851	5	2_2_1	26	0.278	n/a	/n/a	+
10:76285014|76360251	10	76285014	76360251	3	2_1_0	50	0.107	n/a	/n/a	+
10:76349040|76360251	10	76349040	76360251	11	0_4_5	73	0.232	n/a	/n/a	+
10:76349040|76430027	10	76349040	76430027	4	0_1_2	64	0.111	n/a	/n/a	+
10:76360137|76371229	10	76360137	76371229	2	2_0_2	43	0.085	n/a	/n/a	+
10:76598441|76603236	10	76598441	76603236	15	1_6_3	1	0.968	n/a	/n/a	+
10:76602358|76603236	10	76602358	76603236	12	4_4_0	6	0.8	n/a	/n/a	+
10:76729418|76739097	10	76729418	76739097	4	1_1_1	6	0.571	n/a	/n/a	+
10:76910272|76910864	10	76910272	76910864	25	9_10_0	34	0.595	n/a	/n/a	+
10:76910272|76928416	10	76910272	76928416	3	2_2_0	15	0.286	n/a	/n/a	+
10:76978821|76979114	10	76978821	76979114	52	12_18_3	59	0.638	n/a	/n/a	+
10:76978821|76980728	10	76978821	76980728	9	3_1_0	38	0.321	n/a	/n/a	+
10:77306789|77307420	10	77306789	77307420	18	5_7_0	3	0.923	n/a	/n/a	+
10:79613112|79614128	10	79613112	79614128	23	5_6_0	72	0.39	n/a	/n/a	-
10:79741912|79744056	10	79741912	79744056	3	2_2_0	143	0.04	n/a	/n/a	-
10:79761955|79767624	10	79761955	79767624	8	2_2_1	19	0.457	n/a	/n/a	-
10:81813152|81813342	10	81813152	81813342	5	4_3_0	10	0.5	n/a	/n/a	-
10:82185622|82187252	10	82185622	82187252	6	2_2_0	28	0.3	n/a	/n/a	+
10:82228303|82249070	10	82228303	82249070	8	4_2_3	7	0.696	n/a	/n/a	+
10:85901218|85903862	10	85901218	85903862	9	3_2_0	866	0.02	n/a	/n/a	+
10:86130770|86133571	10	86130770	86133571	11	5_5_2	26	0.458	n/a	/n/a	+
10:86130770|86185649	10	86130770	86185649	6	2_2_0	110	0.098	n/a	/n/a	+
10:86132067|86177617	10	86132067	86177617	4	2_1_0	309	0.025	n/a	/n/a	+
10:86132067|86198463	10	86132067	86198463	4	2_2_0	39	0.17	n/a	/n/a	+
10:86132067|86230214	10	86132067	86230214	3	1_1_1	33	0.154	n/a	/n/a	+
10:86177527|86185649	10	86177527	86185649	325	32_52_41	178	0.785	n/a	/n/a	+
10:86177527|86198463	10	86177527	86198463	175	21_47_31	103	0.773	n/a	/n/a	+
10:86177527|86237420	10	86177527	86237420	10	1_3_9	76	0.208	n/a	/n/a	+
10:86185487|86237420	10	86185487	86237420	6	1_1_2	326	0.036	n/a	/n/a	+
10:86198268|86237420	10	86198268	86237420	6	2_2_0	109	0.099	n/a	/n/a	+
10:88203032|88206206	10	88203032	88206206	11	1_4_1	21	0.512	n/a	/n/a	-
10:88211724|88221044	10	88211724	88221044	6	2_1_1	28	0.3	n/a	/n/a	-
10:88211724|88233730	10	88211724	88233730	2	2_1_1	34	0.105	n/a	/n/a	-
10:88227036|88230860	10	88227036	88230860	3	1_2_0	18	0.25	n/a	/n/a	-
10:88598622|88635842	10	88598622	88635842	8	3_3_0	14	0.533	n/a	/n/a	+
10:89268093|89272978	10	89268093	89272978	7	3_1_1	17	0.452	n/a	/n/a	+
10:89268093|89280926	10	89268093	89280926	17	9_7_0	15	0.694	n/a	/n/a	+
10:89516546|89530798	10	89516546	89530798	4	1_1_2	43	0.157	n/a	/n/a	-
10:89516546|89536184	10	89516546	89536184	4	2_1_0	60	0.118	n/a	/n/a	-
10:89527430|89536184	10	89527430	89536184	82	8_18_18	66	0.713	n/a	/n/a	-
10:89544227|89552512	10	89544227	89552512	7	4_4_0	32	0.304	n/a	/n/a	-
10:89544227|89574369	10	89544227	89574369	2	2_1_0	31	0.114	n/a	/n/a	-
10:89624211|89638780	10	89624211	89638780	6	4_1_4	47	0.203	n/a	/n/a	+
10:89624211|89639867	10	89624211	89639867	3	1_0_2	33	0.154	n/a	/n/a	+
10:89624211|89653866	10	89624211	89653866	5	2_1_1	34	0.227	n/a	/n/a	+
10:89624211|89693008	10	89624211	89693008	6	2_1_0	71	0.145	n/a	/n/a	+
10:89635162|89638780	10	89635162	89638780	3	1_0_2	34	0.15	n/a	/n/a	+
10:89635162|89640195	10	89635162	89640195	8	1_2_2	39	0.291	n/a	/n/a	+
10:89635162|89693008	10	89635162	89693008	6	1_1_4	61	0.164	n/a	/n/a	+
10:89638683|89693008	10	89638683	89693008	10	3_3_3	60	0.25	n/a	/n/a	+
10:89682220|89712016	10	89682220	89712016	6	2_2_0	28	0.3	n/a	/n/a	+
10:89685270|89693008	10	89685270	89693008	74	5_19_11	63	0.701	n/a	/n/a	+
10:89685270|89712016	10	89685270	89712016	68	4_20_3	29	0.824	n/a	/n/a	+
10:89690803|89693008	10	89690803	89693008	13	1_4_3	81	0.243	n/a	/n/a	+
10:90653628|90665417	10	90653628	90665417	95	8_24_22	44	0.812	n/a	/n/a	+
10:90661413|90665417	10	90661413	90665417	10	1_3_1	100	0.167	n/a	/n/a	+
10:90681040|90683031	10	90681040	90683031	2	1_0_2	22	0.154	n/a	/n/a	+
10:91359009|91371805	10	91359009	91371805	3	2_2_0	16	0.273	n/a	/n/a	-
10:91518463|91522592	10	91518463	91522592	3	1_2_0	10	0.375	n/a	/n/a	+
10:92662000|92663033	10	92662000	92663033	6	3_3_1	84	0.125	n/a	/n/a	+
10:93000241|93011197	10	93000241	93011197	11	4_5_1	6	0.786	n/a	/n/a	+
10:93185038|93221941	10	93185038	93221941	285	34_17_37	33	0.945	n/a	/n/a	+
10:93185093|93221941	10	93185093	93221941	2	1_1_1	130	0.03	n/a	/n/a	+
10:93220184|93221941	10	93220184	93221941	26	7_5_4	193	0.212	n/a	/n/a	+
10:93566899|93567202	10	93566899	93567202	3	1_3_0	88	0.064	n/a	/n/a	-
10:93579027|93602148	10	93579027	93602148	8	1_3_4	30	0.348	n/a	/n/a	+
10:93608140|93611093	10	93608140	93611093	4	3_2_0	33	0.195	n/a	/n/a	+
10:93609269|93611093	10	93609269	93611093	4	0_2_2	43	0.157	n/a	/n/a	+
10:93699709|93702325	10	93699709	93702325	67	16_23_8	28	0.827	n/a	/n/a	+
10:93751876|93768032	10	93751876	93768032	9	2_3_0	23	0.439	n/a	/n/a	+
10:93754292|93768032	10	93754292	93768032	11	3_4_2	16	0.579	n/a	/n/a	+
10:93756126|93757508	10	93756126	93757508	4	2_3_0	44	0.154	n/a	/n/a	+
10:93756126|93768032	10	93756126	93768032	19	5_5_0	27	0.585	n/a	/n/a	+
10:93841077|93851701	10	93841077	93851701	69	15_12_7	12	0.92	n/a	/n/a	-
10:93841077|93870951	10	93841077	93870951	7	4_2_0	85	0.141	n/a	/n/a	-
10:93870833|93911113	10	93870833	93911113	5	1_1_1	39	0.204	n/a	/n/a	-
10:93870833|93940776	10	93870833	93940776	24	6_4_5	106	0.312	n/a	/n/a	-
10:93870833|93952393	10	93870833	93952393	18	4_1_7	47	0.434	n/a	/n/a	-
10:93902786|93904869	10	93902786	93904869	23	5_10_5	226	0.169	n/a	/n/a	-
10:93902786|93940776	10	93902786	93940776	115	18_10_33	168	0.578	n/a	/n/a	-
10:93902786|93952393	10	93902786	93952393	50	10_8_14	114	0.467	n/a	/n/a	-
10:93926214|93952393	10	93926214	93952393	6	2_2_0	21	0.364	n/a	/n/a	-
10:93940720|93952393	10	93940720	93952393	14	0_4_6	131	0.176	n/a	/n/a	-
10:94093227|94100560	10	94093227	94100560	2	2_1_0	87	0.044	n/a	/n/a	+
10:94234598|94235751	10	94234598	94235751	2	2_1_0	4	0.5	n/a	/n/a	-
10:94291505|94297307	10	94291505	94297307	93	28_20_3	23	0.89	n/a	/n/a	-
10:94392243|94393552	10	94392243	94393552	3	1_2_1	30	0.167	n/a	/n/a	+
10:94406486|94407513	10	94406486	94407513	6	0_1_3	2	0.857	n/a	/n/a	-
10:94653087|94659401	10	94653087	94659401	11	4_1_3	59	0.272	n/a	/n/a	+
10:94653106|94654777	10	94653106	94654777	11	3_2_2	153	0.126	n/a	/n/a	+
10:94653106|94659401	10	94653106	94659401	362	57_9_52	85	0.895	n/a	/n/a	+
10:94653106|94669388	10	94653106	94669388	30	7_8_0	51	0.541	n/a	/n/a	+
10:94659356|94669388	10	94659356	94669388	16	3_5_3	127	0.201	n/a	/n/a	+
10:94693901|94700581	10	94693901	94700581	11	0_3_6	3	0.88	n/a	/n/a	+
10:94733810|94757372	10	94733810	94757372	2	1_2_0	25	0.138	n/a	/n/a	+
10:94733810|94774024	10	94733810	94774024	26	6_3_7	36	0.591	n/a	/n/a	+
10:94757231|94778698	10	94757231	94778698	7	2_0_3	33	0.298	n/a	/n/a	+
10:94757231|94818092	10	94757231	94818092	5	1_1_1	39	0.204	n/a	/n/a	+
10:95140976|95148911	10	95140976	95148911	21	9_7_1	67	0.385	n/a	/n/a	-
10:95161175|95163976	10	95161175	95163976	3	2_1_1	72	0.077	n/a	/n/a	-
10:95276824|95278684	10	95276824	95278684	2	2_0_2	12	0.25	n/a	/n/a	+
10:95278634|95279564	10	95278634	95279564	14	0_2_5	13	0.683	n/a	/n/a	+
10:95790440|95792009	10	95790440	95792009	5	2_2_1	1	0.909	n/a	/n/a	+
10:96005703|96006378	10	96005703	96006378	98	28_23_2	25	0.887	n/a	/n/a	+
10:96018557|96018907	10	96018557	96018907	4	2_2_1	4	0.667	n/a	/n/a	+
10:96201653|96203180	10	96201653	96203180	8	3_3_2	70	0.186	n/a	/n/a	+
10:96201653|96204296	10	96201653	96204296	10	2_3_3	56	0.263	n/a	/n/a	+
10:96201653|96234540	10	96201653	96234540	107	24_19_21	55	0.796	n/a	/n/a	+
10:96201653|96253204	10	96201653	96253204	22	6_4_2	42	0.512	n/a	/n/a	+
10:96201653|96271411	10	96201653	96271411	2	1_0_2	38	0.095	n/a	/n/a	+
10:96207392|96234540	10	96207392	96234540	7	0_2_3	64	0.179	n/a	/n/a	+
10:96211315|96234540	10	96211315	96234540	4	0_1_2	47	0.145	n/a	/n/a	+
10:96218237|96234540	10	96218237	96234540	6	2_2_1	34	0.261	n/a	/n/a	+
10:96234425|96253204	10	96234425	96253204	2	2_0_2	135	0.029	n/a	/n/a	+
10:96271340|96282210	10	96271340	96282210	5	1_2_3	8	0.556	n/a	/n/a	+
10:96290959|96291217	10	96290959	96291217	5	1_2_1	12	0.455	n/a	/n/a	+
10:96347986|96367783	10	96347986	96367783	2	2_2_0	19	0.174	n/a	/n/a	+
10:96988095|97007123	10	96988095	97007123	3	2_1_0	35	0.146	n/a	/n/a	-
10:96998325|97007123	10	96998325	97007123	8	3_2_1	50	0.242	n/a	/n/a	-
10:98290297|98321895	10	98290297	98321895	2	0_1_2	33	0.108	n/a	/n/a	-
10:98303833|98319493	10	98303833	98319493	17	4_2_4	74	0.315	n/a	/n/a	-
10:98303833|98325183	10	98303833	98325183	5	1_2_1	77	0.115	n/a	/n/a	-
10:98618049|98667504	10	98618049	98667504	44	11_10_9	29	0.752	n/a	/n/a	+
10:98666003|98667504	10	98666003	98667504	7	2_2_1	22	0.389	n/a	/n/a	+
10:98667022|98667504	10	98667022	98667504	22	1_5_14	37	0.543	n/a	/n/a	+
10:98667022|98704002	10	98667022	98704002	6	1_4_3	43	0.218	n/a	/n/a	+
10:98667022|98711953	10	98667022	98711953	8	0_2_3	16	0.5	n/a	/n/a	+
10:98703870|98711953	10	98703870	98711953	8	4_4_0	15	0.516	n/a	/n/a	+
10:98708765|98711953	10	98708765	98711953	4	1_1_1	25	0.242	n/a	/n/a	+
10:99148009|99148381	10	99148009	99148381	7	3_3_0	89	0.136	n/a	/n/a	-
10:99196174|99197507	10	99196174	99197507	29	10_0_11	38	0.604	n/a	/n/a	-
10:99196174|99198460	10	99196174	99198460	2	2_0_2	33	0.108	n/a	/n/a	-
10:99196948|99197507	10	99196948	99197507	31	10_11_2	79	0.44	n/a	/n/a	-
10:99196948|99198460	10	99196948	99198460	4	2_1_1	79	0.092	n/a	/n/a	-
10:99236440|99238146	10	99236440	99238146	7	1_2_3	66	0.175	n/a	/n/a	-
10:99416042|99416731	10	99416042	99416731	27	4_7_5	76	0.415	n/a	/n/a	+
10:99416042|99422725	10	99416042	99422725	7	2_2_3	61	0.187	n/a	/n/a	+
10:99416042|99424741	10	99416042	99424741	14	6_3_2	71	0.283	n/a	/n/a	+
10:99915850|99923154	10	99915850	99923154	15	0_4_6	12	0.714	n/a	/n/a	+
10:99915850|99946320	10	99915850	99946320	4	0_1_2	6	0.571	n/a	/n/a	+
10:99922640|99923154	10	99922640	99923154	3	1_1_1	19	0.24	n/a	/n/a	+
10:101556854|101560320	10	101556854	101560320	9	3_3_0	57	0.24	n/a	/n/a	+
10:101590064|101591888	10	101590064	101591888	3	1_2_0	15	0.286	n/a	/n/a	+
10:101667752|101668903	10	101667752	101668903	12	4_5_2	19	0.558	n/a	/n/a	-
10:102003455|102006692	10	102003455	102006692	5	2_3_1	30	0.25	n/a	/n/a	-
10:102003455|102013296	10	102003455	102013296	7	2_2_0	16	0.467	n/a	/n/a	-
10:102005556|102006692	10	102005556	102006692	3	2_2_0	42	0.125	n/a	/n/a	-
10:102016019|102020076	10	102016019	102020076	5	1_0_2	93	0.097	n/a	/n/a	-
10:102019975|102021820	10	102019975	102021820	11	2_0_3	85	0.206	n/a	/n/a	-
10:102689074|102690835	10	102689074	102690835	4	2_1_1	15	0.348	n/a	/n/a	+
10:102697159|102698493	10	102697159	102698493	4	0_3_2	66	0.108	n/a	/n/a	+
10:102697159|102703885	10	102697159	102703885	20	1_3_8	38	0.513	n/a	/n/a	+
10:102697159|102710510	10	102697159	102710510	19	1_5_6	18	0.679	n/a	/n/a	+
10:102703783|102710510	10	102703783	102710510	8	1_2_1	30	0.348	n/a	/n/a	+
10:102750193|102750767	10	102750193	102750767	11	0_5_3	33	0.4	n/a	/n/a	+
10:102777856|102778974	10	102777856	102778974	10	2_2_0	9	0.69	n/a	/n/a	-
10:103344359|103345913	10	103344359	103345913	3	1_1_1	27	0.182	n/a	/n/a	-
10:103419935|103436193	10	103419935	103436193	5	1_1_2	9	0.526	n/a	/n/a	-
10:103427643|103436193	10	103427643	103436193	18	6_3_6	12	0.75	n/a	/n/a	-
10:103432672|103436193	10	103432672	103436193	17	6_5_3	16	0.68	n/a	/n/a	-
10:103461877|103489570	10	103461877	103489570	11	2_1_2	8	0.733	n/a	/n/a	-
10:103550653|103553755	10	103550653	103553755	4	2_2_0	63	0.113	n/a	/n/a	-
10:103649169|103717489	10	103649169	103717489	15	2_3_5	5	0.857	n/a	/n/a	-
10:103699620|103717489	10	103699620	103717489	31	2_5_8	11	0.849	n/a	/n/a	-
10:103716354|103717489	10	103716354	103717489	9	5_2_3	27	0.4	n/a	/n/a	-
10:103783234|103785005	10	103783234	103785005	6	1_1_2	17	0.414	n/a	/n/a	-
10:103783234|103789502	10	103783234	103789502	4	2_2_1	4	0.667	n/a	/n/a	-
10:103784913|103789502	10	103784913	103789502	2	1_2_1	26	0.133	n/a	/n/a	-
10:103792783|103799882	10	103792783	103799882	4	2_1_1	3	0.727	n/a	/n/a	-
10:104018686|104019873	10	104018686	104019873	27	8_5_8	64	0.458	n/a	/n/a	+
10:104018686|104044827	10	104018686	104044827	46	12_18_10	38	0.708	n/a	/n/a	+
[truncated: 12,003 more rows]

## Sheet: SRR5889366_NCM460_rep2
circRNA_ID	chr	circRNA_start	circRNA_end	#junction_reads	SM_MS_SMS	#non_junction_reads	junction_reads_ratio	circRNA_type	gene_id	strand
1:566152|566440	1	566152	566440	10	1_5_0	18542	0.001	n/a	/n/a	-
1:568947|569173	1	568947	569173	14	5_0_3	16863	0.002	n/a	/n/a	-
1:865535|874792	1	865535	874792	6	3_2_0	33	0.267	n/a	/n/a	+
1:871152|874792	1	871152	874792	3	1_2_0	37	0.14	n/a	/n/a	+
1:1158624|1159348	1	1158624	1159348	2	2_2_0	207	0.019	n/a	/n/a	-
1:1191425|1198766	1	1191425	1198766	6	1_1_3	141	0.078	n/a	/n/a	-
1:1191425|1203372	1	1191425	1203372	8	0_2_3	91	0.15	n/a	/n/a	-
1:1192372|1192690	1	1192372	1192690	30	12_11_0	187	0.243	n/a	/n/a	-
1:1192372|1198766	1	1192372	1198766	8	2_1_1	127	0.112	n/a	/n/a	-
1:1192372|1203372	1	1192372	1203372	13	5_5_2	75	0.257	n/a	/n/a	-
1:1197550|1198766	1	1197550	1198766	3	2_0_1	62	0.088	n/a	/n/a	-
1:1322615|1326245	1	1322615	1326245	3	1_0_2	54	0.1	n/a	/n/a	-
1:1496712|1500296	1	1496712	1500296	10	3_2_1	24	0.455	n/a	/n/a	-
1:1499985|1500296	1	1499985	1500296	10	5_5_0	26	0.435	n/a	/n/a	-
1:1599766|1671143	1	1599766	1671143	12	5_7_0	29	0.453	n/a	/n/a	-
1:1666129|1671143	1	1666129	1671143	4	2_2_0	26	0.235	n/a	/n/a	-
1:1724684|1747301	1	1724684	1747301	3	0_1_2	781	0.008	n/a	/n/a	-
1:1724684|1749314	1	1724684	1749314	4	2_0_2	693	0.011	n/a	/n/a	-
1:1735858|1737977	1	1735858	1737977	54	25_12_14	908	0.106	n/a	/n/a	-
1:1735858|1749314	1	1735858	1749314	71	21_2_20	711	0.166	n/a	/n/a	-
1:1735858|1756938	1	1735858	1756938	4	1_1_1	426	0.018	n/a	/n/a	-
1:1737914|1756921	1	1737914	1756921	9	2_1_2	672	0.026	n/a	/n/a	-
1:1737914|1770677	1	1737914	1770677	15	0_2_9	432	0.065	n/a	/n/a	-
1:1747195|1756938	1	1747195	1756938	4	3_1_2	886	0.009	n/a	/n/a	-
1:1747195|1770677	1	1747195	1770677	3	1_1_3	769	0.008	n/a	/n/a	-
1:1770629|1811341	1	1770629	1811341	4	1_1_1	119	0.063	n/a	/n/a	-
1:1784009|1784736	1	1784009	1784736	4	1_1_2	17	0.32	n/a	/n/a	-
1:1805397|1811341	1	1805397	1811341	3	2_2_1	45	0.118	n/a	/n/a	-
1:2324647|2327310	1	2324647	2327310	3	2_2_0	83	0.067	n/a	/n/a	+
1:2324709|2334520	1	2324709	2334520	4	1_0_2	96	0.077	n/a	/n/a	+
1:2327223|2332374	1	2327223	2332374	9	4_1_6	100	0.153	n/a	/n/a	+
1:3656797|3662750	1	3656797	3662750	9	2_2_0	20	0.474	n/a	/n/a	-
1:3697715|3698165	1	3697715	3698165	2	2_1_1	271	0.015	n/a	/n/a	-
1:5987709|5993389	1	5987709	5993389	7	2_2_0	25	0.359	n/a	/n/a	-
1:5987709|6012896	1	5987709	6012896	9	3_3_3	74	0.196	n/a	/n/a	-
1:6007164|6012896	1	6007164	6012896	39	15_14_3	64	0.549	n/a	/n/a	-
1:6007164|6022009	1	6007164	6022009	48	14_13_6	37	0.722	n/a	/n/a	-
1:6021854|6029319	1	6021854	6029319	4	1_1_1	82	0.089	n/a	/n/a	-
1:6021854|6046387	1	6021854	6046387	2	2_2_0	59	0.063	n/a	/n/a	-
1:6038330|6046387	1	6038330	6046387	2	2_2_0	17	0.19	n/a	/n/a	-
1:6291962|6293703	1	6291962	6293703	12	5_5_1	65	0.27	n/a	/n/a	-
1:6341162|6355040	1	6341162	6355040	5	3_3_0	28	0.263	n/a	/n/a	-
1:6592028|6593501	1	6592028	6593501	5	0_1_2	27	0.27	n/a	/n/a	-
1:6593340|6609758	1	6593340	6609758	7	2_2_0	30	0.318	n/a	/n/a	-
1:6601890|6605240	1	6601890	6605240	3	1_1_1	21	0.222	n/a	/n/a	-
1:6867043|6885270	1	6867043	6885270	37	7_11_6	45	0.622	n/a	/n/a	+
1:6867043|6948959	1	6867043	6948959	9	1_1_4	4	0.818	n/a	/n/a	+
1:6880241|6885270	1	6880241	6885270	3	0_2_2	61	0.09	n/a	/n/a	+
1:6880241|6931900	1	6880241	6931900	4	0_1_2	42	0.16	n/a	/n/a	+
1:6880241|6948959	1	6880241	6948959	10	2_3_8	21	0.488	n/a	/n/a	+
1:7309551|7454054	1	7309551	7454054	3	1_1_1	0	1	n/a	/n/a	+
1:7837220|7838229	1	7837220	7838229	18	8_2_6	33	0.522	n/a	/n/a	+
1:7854017|7861251	1	7854017	7861251	3	0_1_3	4	0.6	n/a	/n/a	+
1:7895822|7897209	1	7895822	7897209	3	1_2_0	0	1	n/a	/n/a	+
1:8037712|8045195	1	8037712	8045195	17	1_6_6	127	0.211	n/a	/n/a	+
1:8482787|8601377	1	8482787	8601377	11	2_3_4	484	0.043	n/a	/n/a	-
1:8482787|8674745	1	8482787	8674745	4	1_2_1	46	0.148	n/a	/n/a	-
1:8525985|8601377	1	8525985	8601377	9	3_4_2	491	0.035	n/a	/n/a	-
1:8525985|8617582	1	8525985	8617582	7	2_3_4	119	0.105	n/a	/n/a	-
1:8525985|8674745	1	8525985	8674745	7	1_2_2	53	0.209	n/a	/n/a	-
1:8555123|8557589	1	8555123	8557589	3	1_1_1	293	0.02	n/a	/n/a	-
1:8555123|8568734	1	8555123	8568734	5	1_0_2	243	0.04	n/a	/n/a	-
1:8555123|8601377	1	8555123	8601377	70	13_11_15	528	0.21	n/a	/n/a	-
1:8555123|8617582	1	8555123	8617582	71	10_13_23	161	0.469	n/a	/n/a	-
1:8555123|8674745	1	8555123	8674745	39	10_14_8	95	0.451	n/a	/n/a	-
1:8568686|8617582	1	8568686	8617582	47	5_15_17	316	0.229	n/a	/n/a	-
1:8568686|8674745	1	8568686	8674745	20	2_8_8	254	0.136	n/a	/n/a	-
1:8601273|8617582	1	8601273	8617582	123	18_22_24	399	0.381	n/a	/n/a	-
1:8601273|8674745	1	8601273	8674745	165	26_31_22	334	0.497	n/a	/n/a	-
1:8601273|8684439	1	8601273	8684439	3	1_1_3	312	0.019	n/a	/n/a	-
1:8611267|8617582	1	8611267	8617582	8	2_1_0	106	0.131	n/a	/n/a	-
1:8616534|8674745	1	8616534	8674745	40	8_14_9	490	0.14	n/a	/n/a	-
1:8674620|8684439	1	8674620	8684439	12	5_6_2	67	0.264	n/a	/n/a	-
1:8926338|8928116	1	8926338	8928116	4	1_2_0	370	0.021	n/a	/n/a	-
1:9931245|9938047	1	9931245	9938047	13	7_3_4	27	0.491	n/a	/n/a	-
1:9991949|9994918	1	9991949	9994918	185	23_29_43	29	0.927	n/a	/n/a	-
1:9991949|9995685	1	9991949	9995685	14	1_5_7	7	0.8	n/a	/n/a	-
1:10032076|10041228	1	10032076	10041228	4	4_4_0	11	0.421	n/a	/n/a	+
1:10155519|10165802	1	10155519	10165802	143	29_31_10	29	0.908	n/a	/n/a	+
1:10195046|10197263	1	10195046	10197263	6	4_3_0	10	0.545	n/a	/n/a	+
1:10316305|10322028	1	10316305	10322028	5	1_1_2	24	0.294	n/a	/n/a	+
1:10316305|10328321	1	10316305	10328321	3	1_1_1	44	0.12	n/a	/n/a	+
1:10327438|10328321	1	10327438	10328321	18	6_5_5	53	0.404	n/a	/n/a	+
1:10327438|10332364	1	10327438	10332364	4	1_0_2	27	0.229	n/a	/n/a	+
1:10331560|10335561	1	10331560	10335561	5	2_0_2	68	0.128	n/a	/n/a	+
1:10423341|10425706	1	10423341	10425706	4	0_2_2	34	0.19	n/a	/n/a	+
1:10431199|10435431	1	10431199	10435431	6	1_1_1	11	0.522	n/a	/n/a	+
1:10463128|10464336	1	10463128	10464336	3	1_2_0	126	0.045	n/a	/n/a	+
1:10471475|10473308	1	10471475	10473308	3	2_1_0	127	0.045	n/a	/n/a	+
1:10500404|10502498	1	10500404	10502498	9	2_4_1	18	0.5	n/a	/n/a	+
1:10527247|10529395	1	10527247	10529395	35	11_13_1	35	0.667	n/a	/n/a	-
1:11073773|11078930	1	11073773	11078930	7	3_3_0	97	0.126	n/a	/n/a	+
1:11075581|11077064	1	11075581	11077064	7	2_2_0	77	0.154	n/a	/n/a	+
1:11076901|11078930	1	11076901	11078930	7	2_1_0	115	0.109	n/a	/n/a	+
1:11130957|11137005	1	11130957	11137005	41	6_12_13	115	0.416	n/a	/n/a	-
1:11133991|11137005	1	11133991	11137005	49	10_15_15	140	0.412	n/a	/n/a	-
1:11150611|11151654	1	11150611	11151654	3	1_0_2	11	0.353	n/a	/n/a	-
1:11181152|11182183	1	11181152	11182183	2	1_2_0	34	0.105	n/a	/n/a	-
1:11181303|11182183	1	11181303	11182183	10	4_5_0	51	0.282	n/a	/n/a	-
1:11259315|11259760	1	11259315	11259760	6	4_4_0	26	0.316	n/a	/n/a	-
1:11300360|11303357	1	11300360	11303357	3	1_1_1	73	0.076	n/a	/n/a	-
1:12049222|12052747	1	12049222	12052747	7	2_2_0	58	0.194	n/a	/n/a	+
1:12065768|12069783	1	12065768	12069783	6	0_2_2	149	0.075	n/a	/n/a	+
1:12359259|12364785	1	12359259	12364785	8	4_4_1	30	0.348	n/a	/n/a	+
1:12359259|12368698	1	12359259	12368698	11	6_5_0	25	0.468	n/a	/n/a	+
1:12382593|12383837	1	12382593	12383837	4	2_0_2	17	0.32	n/a	/n/a	+
1:12460238|12476880	1	12460238	12476880	25	7_7_1	23	0.685	n/a	/n/a	+
1:12460238|12520451	1	12460238	12520451	6	2_2_0	18	0.4	n/a	/n/a	+
1:12475140|12476880	1	12475140	12476880	7	5_4_0	15	0.483	n/a	/n/a	+
1:12632756|12639440	1	12632756	12639440	2	2_2_0	518	0.008	n/a	/n/a	-
1:12632756|12640694	1	12632756	12640694	13	5_5_2	740	0.034	n/a	/n/a	-
1:12638746|12639440	1	12638746	12639440	293	56_52_25	573	0.506	n/a	/n/a	-
1:12638746|12640694	1	12638746	12640694	31	11_11_0	805	0.072	n/a	/n/a	-
1:15370485|15370655	1	15370485	15370655	4	1_2_1	10	0.444	n/a	/n/a	+
1:15860732|15874923	1	15860732	15874923	13	6_6_0	6	0.812	n/a	/n/a	+
1:15964802|15970145	1	15964802	15970145	22	7_7_4	6	0.88	n/a	/n/a	+
1:15970017|15973479	1	15970017	15973479	4	2_2_0	29	0.216	n/a	/n/a	+
1:15973332|15976318	1	15973332	15976318	17	6_7_4	10	0.773	n/a	/n/a	+
1:15976215|15978390	1	15976215	15978390	4	1_2_2	3	0.727	n/a	/n/a	+
1:16044388|16047883	1	16044388	16047883	50	15_8_14	54	0.649	n/a	/n/a	+
1:16116601|16123438	1	16116601	16123438	27	8_3_3	57	0.486	n/a	/n/a	-
1:16119332|16123438	1	16119332	16123438	29	11_4_7	102	0.362	n/a	/n/a	-
1:16199311|16203173	1	16199311	16203173	13	5_4_1	16	0.619	n/a	/n/a	+
1:16235816|16242774	1	16235816	16242774	7	3_4_1	2	0.875	n/a	/n/a	+
1:16237596|16242774	1	16237596	16242774	6	2_2_0	5	0.706	n/a	/n/a	+
1:16237596|16248844	1	16237596	16248844	6	1_1_1	7	0.632	n/a	/n/a	+
1:16263658|16264501	1	16263658	16264501	3	1_1_1	9	0.4	n/a	/n/a	+
1:16464348|16464925	1	16464348	16464925	7	3_2_1	66	0.175	n/a	/n/a	-
1:16490966|16494748	1	16490966	16494748	11	3_2_2	10	0.688	n/a	/n/a	+
1:16528277|16529069	1	16528277	16529069	20	5_9_4	50	0.444	n/a	/n/a	-
1:16632298|16641930	1	16632298	16641930	6	2_2_0	48	0.2	n/a	/n/a	-
1:16778333|16782388	1	16778333	16782388	3	1_0_2	41	0.128	n/a	/n/a	+
1:16935003|16935274	1	16935003	16935274	3	1_1_1	46	0.115	n/a	/n/a	-
1:17349103|17350569	1	17349103	17350569	6	2_3_1	189	0.06	n/a	/n/a	-
1:17928622|17934472	1	17928622	17934472	4	0_2_2	25	0.242	n/a	/n/a	+
1:19510305|19511780	1	19510305	19511780	12	2_2_2	52	0.316	n/a	/n/a	-
1:19513034|19514034	1	19513034	19514034	8	3_2_3	52	0.235	n/a	/n/a	-
1:19519927|19523759	1	19519927	19523759	4	3_3_0	70	0.103	n/a	/n/a	-
1:19683129|19684057	1	19683129	19684057	5	2_3_1	68	0.128	n/a	/n/a	-
1:19683129|19712120	1	19683129	19712120	3	2_2_0	118	0.048	n/a	/n/a	-
1:19683129|19746244	1	19683129	19746244	6	1_1_1	68	0.15	n/a	/n/a	-
1:19705034|19712120	1	19705034	19712120	4	1_1_1	128	0.059	n/a	/n/a	-
1:20097035|20113610	1	20097035	20113610	4	0_2_3	23	0.258	n/a	/n/a	-
1:20216878|20224155	1	20216878	20224155	4	2_1_0	5	0.615	n/a	/n/a	+
1:21039947|21042132	1	21039947	21042132	6	2_2_0	1	0.923	n/a	/n/a	-
1:21071237|21083749	1	21071237	21083749	3	2_1_0	551	0.011	n/a	/n/a	-
1:21074037|21076375	1	21074037	21076375	5	1_2_1	257	0.037	n/a	/n/a	-
1:21076216|21076375	1	21076216	21076375	6	3_2_0	231	0.049	n/a	/n/a	-
1:21076216|21076468	1	21076216	21076468	19	12_9_1	74	0.339	n/a	/n/a	-
1:21076216|21100103	1	21076216	21100103	98	32_32_5	153	0.562	n/a	/n/a	-
1:21083659|21100103	1	21083659	21100103	135	22_37_21	256	0.513	n/a	/n/a	-
1:21083659|21103243	1	21083659	21103243	11	1_5_3	210	0.095	n/a	/n/a	-
1:21083659|21106404	1	21083659	21106404	3	1_1_1	191	0.03	n/a	/n/a	-
1:21091870|21100103	1	21091870	21100103	60	18_18_1	587	0.17	n/a	/n/a	-
1:21091870|21106404	1	21091870	21106404	3	2_1_1	521	0.011	n/a	/n/a	-
1:21097423|21100103	1	21097423	21100103	109	34_28_6	261	0.455	n/a	/n/a	-
1:21102217|21102498	1	21102217	21102498	72	27_19_3	51	0.738	n/a	/n/a	-
1:21137231|21139732	1	21137231	21139732	7	1_1_1	23	0.378	n/a	/n/a	-
1:21205816|21212864	1	21205816	21212864	11	4_4_1	18	0.55	n/a	/n/a	-
1:21220010|21221994	1	21220010	21221994	39	12_13_2	49	0.614	n/a	/n/a	-
1:21295967|21307720	1	21295967	21307720	7	2_2_0	57	0.197	n/a	/n/a	-
1:21306827|21307720	1	21306827	21307720	4	1_2_0	54	0.129	n/a	/n/a	-
1:21327692|21329301	1	21327692	21329301	92	32_24_11	74	0.713	n/a	/n/a	-
1:21327692|21437876	1	21327692	21437876	7	2_0_4	30	0.318	n/a	/n/a	-
1:21329206|21437876	1	21329206	21437876	2	1_0_2	95	0.04	n/a	/n/a	-
1:21373452|21377487	1	21373452	21377487	7	1_2_3	72	0.163	n/a	/n/a	-
1:21373452|21415706	1	21373452	21415706	6	1_1_3	140	0.079	n/a	/n/a	-
1:21377359|21415706	1	21377359	21415706	54	14_7_12	203	0.347	n/a	/n/a	-
1:21377359|21437876	1	21377359	21437876	28	9_4_9	75	0.427	n/a	/n/a	-
1:21386218|21415706	1	21386218	21415706	5	1_2_3	140	0.067	n/a	/n/a	-
1:21389092|21415706	1	21389092	21415706	4	3_1_0	142	0.053	n/a	/n/a	-
1:21415631|21424867	1	21415631	21424867	3	1_2_0	158	0.037	n/a	/n/a	-
1:21415631|21437876	1	21415631	21437876	125	8_10_35	142	0.638	n/a	/n/a	-
1:21415631|21447716	1	21415631	21447716	4	1_2_2	148	0.051	n/a	/n/a	-
1:21415631|21463270	1	21415631	21463270	7	1_0_3	140	0.091	n/a	/n/a	-
1:21415631|21477467	1	21415631	21477467	6	1_1_1	138	0.08	n/a	/n/a	-
1:21431610|21437876	1	21431610	21437876	17	5_2_5	62	0.354	n/a	/n/a	-
1:21562343|21564737	1	21562343	21564737	4	1_2_1	53	0.131	n/a	/n/a	-
1:21599192|21599404	1	21599192	21599404	2	2_2_0	50	0.074	n/a	/n/a	-
1:21599192|21616649	1	21599192	21616649	59	20_10_11	26	0.819	n/a	/n/a	-
1:22047529|22048257	1	22047529	22048257	14	4_4_2	3	0.903	n/a	/n/a	-
1:22062939|22073642	1	22062939	22073642	7	2_1_1	4	0.778	n/a	/n/a	-
1:22073560|22078108	1	22073560	22078108	4	2_2_1	38	0.174	n/a	/n/a	-
1:22073560|22079612	1	22073560	22079612	2	1_2_1	18	0.182	n/a	/n/a	-
1:22073560|22084276	1	22073560	22084276	4	2_0_3	8	0.5	n/a	/n/a	-
1:22074631|22078108	1	22074631	22078108	38	16_13_4	57	0.571	n/a	/n/a	-
1:22074631|22079612	1	22074631	22079612	6	2_2_0	41	0.226	n/a	/n/a	-
1:22078000|22079612	1	22078000	22079612	10	1_2_1	34	0.37	n/a	/n/a	-
1:22079020|22084276	1	22079020	22084276	3	1_2_0	50	0.107	n/a	/n/a	-
1:22188250|22188608	1	22188250	22188608	7	3_5_1	370	0.036	n/a	/n/a	-
1:22400587|22413359	1	22400587	22413359	10	3_3_1	25	0.444	n/a	/n/a	+
1:22404922|22413359	1	22404922	22413359	257	42_45_13	24	0.955	n/a	/n/a	+
1:22404922|22417994	1	22404922	22417994	7	4_2_0	44	0.241	n/a	/n/a	+
1:22408215|22413359	1	22408215	22413359	4	1_2_0	17	0.32	n/a	/n/a	+
1:22417921|22498723	1	22417921	22498723	5	1_2_1	4	0.714	n/a	/n/a	+
1:23356936|23377013	1	23356936	23377013	27	10_9_4	116	0.318	n/a	/n/a	+
1:23356962|23366927	1	23356962	23366927	20	10_8_1	144	0.217	n/a	/n/a	+
1:23356962|23370979	1	23356962	23370979	51	10_5_10	225	0.312	n/a	/n/a	+
1:23356962|23377013	1	23356962	23377013	625	81_73_36	172	0.879	n/a	/n/a	+
1:23356962|23385660	1	23356962	23385660	15	4_2_1	83	0.265	n/a	/n/a	+
1:23366752|23370979	1	23366752	23370979	14	5_2_4	202	0.122	n/a	/n/a	+
1:23366752|23377013	1	23366752	23377013	6	2_2_1	149	0.075	n/a	/n/a	+
1:23370920|23377013	1	23370920	23377013	8	0_3_4	318	0.048	n/a	/n/a	+
1:23370920|23385660	1	23370920	23385660	4	3_2_2	237	0.033	n/a	/n/a	+
1:23376880|23384058	1	23376880	23384058	4	3_2_1	609	0.013	n/a	/n/a	+
1:23376880|23385660	1	23376880	23385660	44	15_9_9	575	0.133	n/a	/n/a	+
1:23381562|23384058	1	23381562	23384058	6	1_4_3	98	0.109	n/a	/n/a	+
1:23381562|23395644	1	23381562	23395644	4	2_1_1	67	0.107	n/a	/n/a	+
1:23385566|23395644	1	23385566	23395644	3	1_1_1	75	0.074	n/a	/n/a	+
1:23395032|23395644	1	23395032	23395644	5	2_0_3	44	0.185	n/a	/n/a	+
1:23397718|23398690	1	23397718	23398690	56	20_6_20	69	0.619	n/a	/n/a	+
1:23435515|23436143	1	23435515	23436143	2	2_0_2	11	0.267	n/a	/n/a	-
1:24075511|24076438	1	24075511	24076438	9	0_2_5	35	0.34	n/a	/n/a	+
1:24098601|24098916	1	24098601	24098916	4	0_1_2	41	0.163	n/a	/n/a	-
1:24140680|24147083	1	24140680	24147083	9	6_2_2	76	0.191	n/a	/n/a	-
1:24143165|24147083	1	24143165	24147083	31	10_6_7	84	0.425	n/a	/n/a	-
1:24766580|24771734	1	24766580	24771734	5	2_1_0	6	0.625	n/a	/n/a	+
1:24766662|24771734	1	24766662	24771734	9	0_3_4	14	0.562	n/a	/n/a	+
1:24840804|24841057	1	24840804	24841057	11	4_5_1	4	0.846	n/a	/n/a	+
1:24857708|24859744	1	24857708	24859744	5	2_3_0	2	0.833	n/a	/n/a	+
1:25124233|25153607	1	25124233	25153607	18	2_2_2	92	0.281	n/a	/n/a	+
1:25140585|25167568	1	25140585	25167568	3	1_2_0	157	0.037	n/a	/n/a	+
1:25568865|25570112	1	25568865	25570112	3	0_2_2	10	0.375	n/a	/n/a	-
1:25568865|25570124	1	25568865	25570124	15	1_1_6	7	0.811	n/a	/n/a	-
1:25568865|25570715	1	25568865	25570715	6	1_0_3	14	0.462	n/a	/n/a	-
1:25666965|25669564	1	25666965	25669564	2	1_2_1	34	0.105	n/a	/n/a	+
1:25666965|25678184	1	25666965	25678184	17	7_2_8	29	0.54	n/a	/n/a	+
1:25666965|25679465	1	25666965	25679465	4	1_1_2	50	0.138	n/a	/n/a	+
1:25678117|25683344	1	25678117	25683344	15	1_0_7	78	0.278	n/a	/n/a	+
1:26566253|26570809	1	26566253	26570809	4	1_2_0	25	0.242	n/a	/n/a	+
1:26581662|26582356	1	26581662	26582356	13	6_5_0	42	0.382	n/a	/n/a	+
1:26584088|26584751	1	26584088	26584751	16	5_5_4	46	0.41	n/a	/n/a	+
1:26584088|26586293	1	26584088	26586293	59	17_19_3	25	0.825	n/a	/n/a	+
1:26594974|26596105	1	26594974	26596105	7	4_2_1	20	0.412	n/a	/n/a	+
1:26759382|26764775	1	26759382	26764775	2	1_1_2	40	0.091	n/a	/n/a	+
1:26769222|26774151	1	26769222	26774151	5	3_0_2	49	0.169	n/a	/n/a	+
1:26772807|26774151	1	26772807	26774151	16	5_4_4	45	0.416	n/a	/n/a	+
1:26772807|26784396	1	26772807	26784396	2	1_2_0	62	0.061	n/a	/n/a	+
1:26772807|26786635	1	26772807	26786635	5	4_3_2	52	0.161	n/a	/n/a	+
1:26774050|26786635	1	26774050	26786635	3	2_1_1	97	0.058	n/a	/n/a	+
1:26784282|26786635	1	26784282	26786635	5	3_1_2	45	0.182	n/a	/n/a	+
1:27056142|27059283	1	27056142	27059283	13	6_6_4	27	0.491	n/a	/n/a	+
1:27269151|27269556	1	27269151	27269556	7	2_4_0	15	0.483	n/a	/n/a	+
1:27432376|27434356	1	27432376	27434356	3	2_1_0	29	0.171	n/a	/n/a	-
1:27432376|27436268	1	27432376	27436268	4	1_2_0	40	0.167	n/a	/n/a	-
1:28116073|28120143	1	28116073	28120143	19	3_6_7	13	0.745	n/a	/n/a	+
1:28116073|28128326	1	28116073	28128326	3	1_2_1	18	0.25	n/a	/n/a	+
1:28223516|28224218	1	28223516	28224218	4	2_2_3	81	0.09	n/a	/n/a	-
1:28315046|28330930	1	28315046	28330930	2	1_0_2	5	0.444	n/a	/n/a	-
1:28337458|28343750	1	28337458	28343750	17	5_2_4	22	0.607	n/a	/n/a	-
1:28365350|28374937	1	28365350	28374937	4	0_1_2	8	0.5	n/a	/n/a	-
1:28374894|28384605	1	28374894	28384605	4	0_1_2	7	0.533	n/a	/n/a	-
1:28598185|28601526	1	28598185	28601526	4	2_2_0	429	0.018	n/a	/n/a	+
1:28598185|28605752	1	28598185	28605752	4	3_2_0	499	0.016	n/a	/n/a	+
1:28601336|28605752	1	28601336	28605752	84	20_25_8	544	0.236	n/a	/n/a	+
1:28733921|28735550	1	28733921	28735550	4	0_2_1	3	0.727	n/a	/n/a	+
1:28897688|28898412	1	28897688	28898412	2	2_0_2	41	0.089	n/a	/n/a	+
1:28907072|28907741	1	28907072	28907741	8	1_1_3	32	0.333	n/a	/n/a	-
1:28930040|28948677	1	28930040	28948677	7	1_2_1	21	0.4	n/a	/n/a	-
1:28944465|28948677	1	28944465	28948677	4	0_2_2	39	0.17	n/a	/n/a	-
1:29338377|29344954	1	29338377	29344954	6	1_1_1	28	0.3	n/a	/n/a	+
1:29362338|29365938	1	29362338	29365938	28	5_8_4	23	0.709	n/a	/n/a	+
1:29424319|29442315	1	29424319	29442315	3	2_2_0	25	0.194	n/a	/n/a	+
1:29481208|29481422	1	29481208	29481422	131	40_34_13	68	0.794	n/a	/n/a	-
1:29601960|29602268	1	29601960	29602268	12	5_6_0	48	0.333	n/a	/n/a	+
1:29609188|29611381	1	29609188	29611381	8	5_4_1	84	0.16	n/a	/n/a	+
1:31413998|31414970	1	31413998	31414970	26	6_6_4	152	0.255	n/a	/n/a	-
1:31447498|31454252	1	31447498	31454252	6	4_1_3	144	0.077	n/a	/n/a	-
1:31452909|31455487	1	31452909	31455487	27	6_3_10	70	0.435	n/a	/n/a	-
1:31465237|31468067	1	31465237	31468067	53	17_19_0	139	0.433	n/a	/n/a	-
1:31465237|31479946	1	31465237	31479946	4	2_1_1	100	0.074	n/a	/n/a	-
1:31465237|31479949	1	31465237	31479949	11	3_2_2	98	0.183	n/a	/n/a	-
1:31478700|31479946	1	31478700	31479946	12	7_6_2	102	0.19	n/a	/n/a	-
1:31478700|31479949	1	31478700	31479949	206	52_39_13	100	0.805	n/a	/n/a	-
1:31478700|31501711	1	31478700	31501711	5	1_1_1	96	0.094	n/a	/n/a	-
1:31501643|31532424	1	31501643	31532424	8	0_2_1	37	0.302	n/a	/n/a	-
1:31532051|31532424	1	31532051	31532424	5	2_3_0	28	0.263	n/a	/n/a	-
1:31740718|31764853	1	31740718	31764853	8	1_3_1	16	0.5	n/a	/n/a	-
1:31764760|31766195	1	31764760	31766195	3	2_2_0	37	0.14	n/a	/n/a	-
1:32257816|32259836	1	32257816	32259836	4	2_1_1	0	1	n/a	/n/a	-
1:32381496|32385259	1	32381496	32385259	182	23_47_12	31	0.922	n/a	/n/a	-
1:32384571|32385259	1	32384571	32385259	4	3_1_0	50	0.138	n/a	/n/a	-
1:32495899|32498935	1	32495899	32498935	15	3_4_1	282	0.096	n/a	/n/a	+
1:32502511|32504220	1	32502511	32504220	41	8_5_8	353	0.189	n/a	/n/a	+
1:32502511|32505174	1	32502511	32505174	23	10_4_4	364	0.112	n/a	/n/a	+
1:32560385|32566163	1	32560385	32566163	16	6_4_1	33	0.492	n/a	/n/a	+
1:32628836|32632897	1	32628836	32632897	6	0_3_1	139	0.079	n/a	/n/a	+
1:32650126|32653725	1	32650126	32653725	16	1_5_6	61	0.344	n/a	/n/a	+
1:32653555|32653725	1	32653555	32653725	10	2_3_0	79	0.202	n/a	/n/a	+
1:32653555|32655850	1	32653555	32655850	2	2_2_0	122	0.032	n/a	/n/a	+
1:32691772|32692131	1	32691772	32692131	6	2_1_0	311	0.037	n/a	/n/a	+
1:32694100|32694809	1	32694100	32694809	11	4_0_5	205	0.097	n/a	/n/a	+
1:32792540|32793278	1	32792540	32793278	8	6_3_1	30	0.348	n/a	/n/a	+
1:33097428|33099673	1	33097428	33099673	4	1_1_3	94	0.078	n/a	/n/a	-
1:33097428|33099711	1	33097428	33099711	10	3_6_0	65	0.235	n/a	/n/a	-
1:33099246|33099711	1	33099246	33099711	4	2_3_0	53	0.131	n/a	/n/a	-
1:33133826|33138502	1	33133826	33138502	3	2_1_0	20	0.231	n/a	/n/a	+
1:33276192|33276658	1	33276192	33276658	11	3_3_2	326	0.063	n/a	/n/a	-
1:33290914|33318767	1	33290914	33318767	4	1_2_1	16	0.333	n/a	/n/a	+
1:33409620|33415375	1	33409620	33415375	2	2_2_0	31	0.114	n/a	/n/a	-
1:33413823|33415375	1	33413823	33415375	81	27_28_2	47	0.775	n/a	/n/a	-
1:33478808|33480195	1	33478808	33480195	8	4_1_0	36	0.308	n/a	/n/a	-
1:33760538|33760906	1	33760538	33760906	54	13_23_7	17	0.864	n/a	/n/a	+
1:35559515|35563167	1	35559515	35563167	4	2_2_0	36	0.182	n/a	/n/a	+
1:35561420|35563167	1	35561420	35563167	5	1_2_3	36	0.217	n/a	/n/a	+
1:35569896|35570370	1	35569896	35570370	15	8_9_0	28	0.517	n/a	/n/a	+
1:35750274|35761589	1	35750274	35761589	4	1_0_2	1	0.889	n/a	/n/a	+
1:35758627|35761589	1	35758627	35761589	10	2_1_3	6	0.769	n/a	/n/a	+
1:35846860|35854683	1	35846860	35854683	9	6_5_2	27	0.4	n/a	/n/a	+
1:35851043|35855699	1	35851043	35855699	2	1_2_0	26	0.133	n/a	/n/a	+
1:35854511|35855699	1	35854511	35855699	7	2_4_1	38	0.269	n/a	/n/a	+
1:35870624|35873760	1	35870624	35873760	8	6_5_0	16	0.5	n/a	/n/a	+
1:35879573|35881315	1	35879573	35881315	98	22_31_12	15	0.929	n/a	/n/a	+
1:35881067|35881315	1	35881067	35881315	15	7_7_1	93	0.244	n/a	/n/a	+
1:35925906|35932296	1	35925906	35932296	3	2_1_1	24	0.2	n/a	/n/a	-
1:35925906|35936561	1	35925906	35936561	2	2_1_1	27	0.129	n/a	/n/a	-
1:35944567|35944813	1	35944567	35944813	22	8_10_0	79	0.358	n/a	/n/a	-
1:35972213|35972736	1	35972213	35972736	4	2_1_0	80	0.091	n/a	/n/a	-
1:36202515|36204183	1	36202515	36204183	2	2_1_0	40	0.091	n/a	/n/a	-
1:36211052|36212593	1	36211052	36212593	4	2_2_0	7	0.533	n/a	/n/a	-
1:36213508|36214205	1	36213508	36214205	34	12_12_1	10	0.872	n/a	/n/a	-
1:36288463|36292436	1	36288463	36292436	4	2_3_1	52	0.133	n/a	/n/a	+
1:36297028|36301594	1	36297028	36301594	3	2_1_0	24	0.2	n/a	/n/a	+
1:36299591|36301594	1	36299591	36301594	5	2_2_0	17	0.37	n/a	/n/a	+
1:36432556|36439112	1	36432556	36439112	13	6_6_1	10	0.722	n/a	/n/a	+
1:36437625|36439112	1	36437625	36439112	8	4_3_0	58	0.216	n/a	/n/a	+
1:36438976|36450149	1	36438976	36450149	4	2_0_2	80	0.091	n/a	/n/a	+
1:36750114|36750525	1	36750114	36750525	3	2_2_0	1	0.857	n/a	/n/a	+
1:36814371|36823872	1	36814371	36823872	15	1_0_9	47	0.39	n/a	/n/a	-
1:36823840|36824423	1	36823840	36824423	9	6_2_3	83	0.178	n/a	/n/a	-
1:36826822|36828257	1	36826822	36828257	20	9_5_8	51	0.44	n/a	/n/a	-
1:38018246|38019843	1	38018246	38019843	4	2_0_3	20	0.286	n/a	/n/a	-
1:38047824|38049534	1	38047824	38049534	9	3_2_6	10	0.643	n/a	/n/a	-
1:38052912|38054683	1	38052912	38054683	8	3_3_1	3	0.842	n/a	/n/a	-
1:38168924|38171239	1	38168924	38171239	3	2_2_0	54	0.1	n/a	/n/a	+
1:38329984|38334286	1	38329984	38334286	8	3_3_1	52	0.235	n/a	/n/a	-
1:38332131|38339760	1	38332131	38339760	39	8_8_5	33	0.703	n/a	/n/a	-
1:38338602|38339827	1	38338602	38339827	5	2_3_0	47	0.175	n/a	/n/a	-
1:38341278|38344164	1	38341278	38344164	8	4_2_3	36	0.308	n/a	/n/a	-
1:38341278|38351497	1	38341278	38351497	2	2_2_0	34	0.105	n/a	/n/a	-
1:38355229|38357126	1	38355229	38357126	9	4_3_1	25	0.419	n/a	/n/a	-
1:38449841|38450451	1	38449841	38450451	4	2_2_0	2	0.8	n/a	/n/a	-
1:39463843|39469090	1	39463843	39469090	7	2_0_1	9	0.609	n/a	/n/a	+
1:39463843|39469855	1	39463843	39469855	4	2_2_0	23	0.258	n/a	/n/a	+
1:39696854|39723700	1	39696854	39723700	5	1_4_4	7	0.588	n/a	/n/a	+
1:39806174|39806625	1	39806174	39806625	6	2_2_0	2	0.857	n/a	/n/a	+
1:40007329|40020064	1	40007329	40020064	3	1_0_2	4	0.6	n/a	/n/a	-
1:40026754|40038258	1	40026754	40038258	6	0_1_2	23	0.343	n/a	/n/a	-
1:40211047|40214760	1	40211047	40214760	4	2_2_0	642	0.012	n/a	/n/a	+
1:40270550|40274851	1	40270550	40274851	3	1_2_0	9	0.4	n/a	/n/a	+
1:40315791|40318548	1	40315791	40318548	3	2_1_0	24	0.2	n/a	/n/a	-
1:40529899|40530231	1	40529899	40530231	12	5_3_0	42	0.364	n/a	/n/a	+
1:40654727|40661436	1	40654727	40661436	12	6_6_0	187	0.114	n/a	/n/a	+
1:40654727|40668286	1	40654727	40668286	51	19_18_5	13	0.887	n/a	/n/a	+
1:40656444|40661436	1	40656444	40661436	3	2_2_1	254	0.023	n/a	/n/a	+
1:40656444|40668286	1	40656444	40668286	34	5_11_11	95	0.417	n/a	/n/a	+
1:40726511|40728655	1	40726511	40728655	3	1_2_0	18	0.25	n/a	/n/a	+
1:40733458|40737707	1	40733458	40737707	8	4_4_2	26	0.381	n/a	/n/a	+
1:40733477|40737707	1	40733477	40737707	4	0_1_2	26	0.235	n/a	/n/a	+
1:40869356|40872541	1	40869356	40872541	4	2_2_1	0	1	n/a	/n/a	+
1:40922617|40923111	1	40922617	40923111	2	2_1_0	0	1	n/a	/n/a	+
1:40980187|40981590	1	40980187	40981590	2	1_2_1	3	0.571	n/a	/n/a	+
1:41213206|41218918	1	41213206	41218918	8	2_1_2	53	0.232	n/a	/n/a	+
1:41300639|41300985	1	41300639	41300985	4	1_1_1	7	0.533	n/a	/n/a	+
1:41461589|41463198	1	41461589	41463198	3	2_2_0	193	0.03	n/a	/n/a	+
1:41463066|41466789	1	41463066	41466789	10	4_2_1	240	0.077	n/a	/n/a	+
1:41474466|41475261	1	41474466	41475261	65	19_24_8	336	0.279	n/a	/n/a	+
1:41474466|41475926	1	41474466	41475926	82	14_15_21	239	0.407	n/a	/n/a	+
1:41474466|41477361	1	41474466	41477361	2	2_0_1	244	0.016	n/a	/n/a	+
1:41493829|41494398	1	41493829	41494398	8	2_2_0	48	0.25	n/a	/n/a	-
1:41536267|41537645	1	41536267	41537645	12	5_4_1	20	0.545	n/a	/n/a	-
1:41536267|41541123	1	41536267	41541123	37	12_13_0	27	0.733	n/a	/n/a	-
1:41571414|41582682	1	41571414	41582682	9	3_3_3	52	0.257	n/a	/n/a	-
1:41578955|41582682	1	41578955	41582682	21	11_6_7	87	0.326	n/a	/n/a	-
1:41578955|41608784	1	41578955	41608784	75	22_23_1	65	0.698	n/a	/n/a	-
1:41578955|41617356	1	41578955	41617356	6	2_0_2	56	0.176	n/a	/n/a	-
1:41578955|41627104	1	41578955	41627104	5	3_0_3	61	0.141	n/a	/n/a	-
1:41651793|41660071	1	41651793	41660071	13	4_3_3	19	0.578	n/a	/n/a	-
1:42094420|42094618	1	42094420	42094618	10	6_5_1	7	0.741	n/a	/n/a	-
1:42094420|42111914	1	42094420	42111914	3	2_1_0	1	0.857	n/a	/n/a	-
1:42660561|42693637	1	42660561	42693637	6	3_1_1	69	0.148	n/a	/n/a	-
1:42664773|42671534	1	42664773	42671534	4	2_2_0	28	0.222	n/a	/n/a	-
1:42693554|42744343	1	42693554	42744343	38	10_10_8	378	0.167	n/a	/n/a	-
1:42693554|42744455	1	42693554	42744455	17	5_6_2	39	0.466	n/a	/n/a	-
1:42693554|42776781	1	42693554	42776781	34	9_6_20	75	0.476	n/a	/n/a	-
1:42730786|42744343	1	42730786	42744343	275	26_64_44	484	0.532	n/a	/n/a	-
1:42730786|42744455	1	42730786	42744455	108	11_30_21	156	0.581	n/a	/n/a	-
1:42730786|42776781	1	42730786	42776781	136	21_8_51	190	0.589	n/a	/n/a	-
1:42730786|42789498	1	42730786	42789498	19	1_7_7	142	0.211	n/a	/n/a	-
1:42744019|42744343	1	42744019	42744343	17	9_8_0	570	0.056	n/a	/n/a	-
1:42744019|42744455	1	42744019	42744455	6	2_2_1	265	0.043	n/a	/n/a	-
1:42744019|42776781	1	42744019	42776781	19	9_1_8	301	0.112	n/a	/n/a	-
1:42776721|42789498	1	42776721	42789498	2	1_2_1	119	0.033	n/a	/n/a	-
1:43130534|43133111	1	43130534	43133111	17	3_3_2	12	0.739	n/a	/n/a	+
1:43239234|43241150	1	43239234	43241150	41	11_16_7	17	0.828	n/a	/n/a	+
1:43239234|43241193	1	43239234	43241193	12	1_4_1	11	0.686	n/a	/n/a	+
1:43395544|43396537	1	43395544	43396537	3	1_2_0	120	0.048	n/a	/n/a	-
1:44019163|44035449	1	44019163	44035449	4	2_2_0	300	0.026	n/a	/n/a	+
1:44019163|44044591	1	44019163	44044591	3	2_2_0	326	0.018	n/a	/n/a	+
1:44035261|44035449	1	44035261	44035449	5	1_2_0	283	0.034	n/a	/n/a	+
1:44160380|44163684	1	44160380	44163684	4	1_1_1	27	0.229	n/a	/n/a	+
1:44257773|44258596	1	44257773	44258596	5	0_2_2	17	0.37	n/a	/n/a	+
1:44257773|44267216	1	44257773	44267216	2	0_2_2	22	0.154	n/a	/n/a	+
1:44363907|44365399	1	44363907	44365399	4	1_2_2	36	0.182	n/a	/n/a	+
1:44386076|44386600	1	44386076	44386600	10	3_4_1	20	0.5	n/a	/n/a	+
1:44474025|44474295	1	44474025	44474295	2	2_1_0	183	0.021	n/a	/n/a	-
1:44707587|44713710	1	44707587	44713710	14	5_3_4	465	0.057	n/a	/n/a	-
1:44707587|44785416	1	44707587	44785416	4	2_2_2	610	0.013	n/a	/n/a	-
1:44713611|44717214	1	44713611	44717214	7	1_1_1	490	0.028	n/a	/n/a	-
1:44713611|44785416	1	44713611	44785416	14	4_4_3	1093	0.025	n/a	/n/a	-
1:44713611|44804994	1	44713611	44804994	7	2_4_3	559	0.024	n/a	/n/a	-
1:44750507|44778900	1	44750507	44778900	4	2_0_1	1005	0.008	n/a	/n/a	-
1:44750507|44785416	1	44750507	44785416	79	6_14_24	974	0.14	n/a	/n/a	-
1:44750507|44804994	1	44750507	44804994	41	5_15_13	451	0.154	n/a	/n/a	-
1:44773982|44785416	1	44773982	44785416	337	45_51_46	919	0.423	n/a	/n/a	-
1:44773982|44804988	1	44773982	44804988	4	2_3_2	422	0.019	n/a	/n/a	-
1:44773982|44804994	1	44773982	44804994	99	9_19_10	412	0.325	n/a	/n/a	-
1:44773982|44818597	1	44773982	44818597	11	3_3_5	377	0.055	n/a	/n/a	-
1:44778841|44804994	1	44778841	44804994	4	0_2_3	620	0.013	n/a	/n/a	-
1:44785300|44804994	1	44785300	44804994	32	9_11_2	937	0.064	n/a	/n/a	-
1:44785300|44818597	1	44785300	44818597	6	4_2_2	900	0.013	n/a	/n/a	-
1:44804717|44804994	1	44804717	44804994	13	7_7_0	482	0.051	n/a	/n/a	-
1:44877653|44878394	1	44877653	44878394	231	51_47_6	63	0.88	n/a	/n/a	+
1:44877653|44881895	1	44877653	44881895	11	6_4_1	41	0.349	n/a	/n/a	+
1:45166851|45173061	1	45166851	45173061	2	2_1_0	3	0.571	n/a	/n/a	-
1:45223228|45223812	1	45223228	45223812	118	19_21_30	84	0.738	n/a	/n/a	+
1:45241706|45244389	1	45241706	45244389	4	1_2_1	72	0.1	n/a	/n/a	+
1:45340350|45345680	1	45340350	45345680	14	3_5_0	24	0.538	n/a	/n/a	-
1:45340350|45347411	1	45340350	45347411	5	2_1_1	34	0.227	n/a	/n/a	-
1:45516746|45524431	1	45516746	45524431	4	1_2_0	7	0.533	n/a	/n/a	-
1:45553553|45553909	1	45553553	45553909	50	18_18_0	10	0.909	n/a	/n/a	-
1:45887397|45923543	1	45887397	45923543	5	2_2_0	1	0.909	n/a	/n/a	-
1:45980545|45984726	1	45980545	45984726	6	2_2_0	2037	0.006	n/a	/n/a	-
1:46018108|46027550	1	46018108	46027550	2	0_1_2	219	0.018	n/a	/n/a	+
1:46032241|46032692	1	46032241	46032692	29	10_11_2	314	0.156	n/a	/n/a	+
1:46093932|46106075	1	46093932	46106075	9	3_4_0	121	0.129	n/a	/n/a	-
1:46096154|46106075	1	46096154	46106075	18	7_6_0	122	0.228	n/a	/n/a	-
1:46099161|46108171	1	46099161	46108171	13	7_2_4	190	0.12	n/a	/n/a	-
1:46105882|46108171	1	46105882	46108171	13	5_0_6	132	0.165	n/a	/n/a	-
1:46105882|46120991	1	46105882	46120991	7	4_3_2	120	0.104	n/a	/n/a	-
1:46108099|46124814	1	46108099	46124814	6	2_3_1	154	0.072	n/a	/n/a	-
1:46120215|46124814	1	46120215	46124814	8	5_3_0	146	0.099	n/a	/n/a	-
1:46193303|46195441	1	46193303	46195441	19	7_7_2	18	0.679	n/a	/n/a	-
1:46290105|46295253	1	46290105	46295253	21	9_12_0	45	0.483	n/a	/n/a	+
1:46290105|46425149	1	46290105	46425149	3	2_2_0	44	0.12	n/a	/n/a	+
1:46531726|46546422	1	46531726	46546422	5	1_1_3	30	0.25	n/a	/n/a	-
1:46543187|46546422	1	46543187	46546422	43	10_9_12	28	0.754	n/a	/n/a	-
1:46543187|46597628	1	46543187	46597628	8	2_2_2	18	0.471	n/a	/n/a	-
1:46775569|46775988	1	46775569	46775988	7	3_4_0	147	0.087	n/a	/n/a	+
1:47098431|47101642	1	47098431	47101642	7	2_2_3	22	0.389	n/a	/n/a	-
1:47728575|47737913	1	47728575	47737913	8	5_4_0	6	0.727	n/a	/n/a	-
1:47735307|47737913	1	47735307	47737913	6	1_2_1	10	0.545	n/a	/n/a	-
1:47745913|47748131	1	47745913	47748131	12	2_3_1	8	0.75	n/a	/n/a	-
1:47753223|47761520	1	47753223	47761520	19	2_1_7	25	0.603	n/a	/n/a	-
1:47753223|47765824	1	47753223	47765824	16	3_5_10	40	0.444	n/a	/n/a	-
1:47753223|47767420	1	47753223	47767420	4	2_2_0	31	0.205	n/a	/n/a	-
1:47753223|47770668	1	47753223	47770668	7	1_3_1	28	0.333	n/a	/n/a	-
1:47755107|47765824	1	47755107	47765824	6	3_1_0	79	0.132	n/a	/n/a	-
1:47761437|47765824	1	47761437	47765824	4	2_2_0	68	0.105	n/a	/n/a	-
1:47761437|47767420	1	47761437	47767420	76	12_13_14	58	0.724	n/a	/n/a	-
1:47761437|47770668	1	47761437	47770668	4	1_2_1	56	0.125	n/a	/n/a	-
1:47767233|47776034	1	47767233	47776034	2	1_1_1	36	0.1	n/a	/n/a	-
1:47767906|47770668	1	47767906	47770668	3	1_1_1	47	0.113	n/a	/n/a	-
1:47834141|47840965	1	47834141	47840965	5	2_1_0	20	0.333	n/a	/n/a	+
1:47838627|47840965	1	47838627	47840965	5	1_2_0	42	0.192	n/a	/n/a	+
1:47840581|47840965	1	47840581	47840965	4	2_1_1	61	0.116	n/a	/n/a	+
1:48821342|48825442	1	48821342	48825442	17	7_8_4	0	1	n/a	/n/a	-
1:48917224|48918803	1	48917224	48918803	9	0_2_2	4	0.818	n/a	/n/a	-
1:51001041|51032903	1	51001041	51032903	9	4_6_1	359	0.048	n/a	/n/a	-
1:51001041|51050483	1	51001041	51050483	8	3_5_2	377	0.041	n/a	/n/a	-
1:51001041|51061888	1	51001041	51061888	16	5_4_4	292	0.099	n/a	/n/a	-
1:51005264|51061888	1	51005264	51061888	45	19_12_6	281	0.243	n/a	/n/a	-
1:51032749|51050483	1	51032749	51050483	7	5_4_1	318	0.042	n/a	/n/a	-
1:51032749|51061888	1	51032749	51061888	130	34_25_10	235	0.525	n/a	/n/a	-
1:51048290|51061888	1	51048290	51061888	18	4_6_3	256	0.123	n/a	/n/a	-
1:51121114|51210447	1	51121114	51210447	18	5_2_6	215	0.143	n/a	/n/a	-
1:51121114|51267349	1	51121114	51267349	2	1_0_2	88	0.043	n/a	/n/a	-
1:51171458|51210447	1	51171458	51210447	18	7_6_7	250	0.126	n/a	/n/a	-
1:51171458|51246716	1	51171458	51246716	5	1_1_2	115	0.08	n/a	/n/a	-
1:51171458|51253877	1	51171458	51253877	2	2_2_0	136	0.029	n/a	/n/a	-
1:51171458|51267349	1	51171458	51267349	3	1_0_2	120	0.048	n/a	/n/a	-
1:51171458|51323669	1	51171458	51323669	5	2_2_1	106	0.086	n/a	/n/a	-
1:51204535|51210447	1	51204535	51210447	9	4_2_5	313	0.054	n/a	/n/a	-
1:51204535|51218195	1	51204535	51218195	12	3_3_2	200	0.107	n/a	/n/a	-
1:51204535|51246716	1	51204535	51246716	5	1_2_2	217	0.044	n/a	/n/a	-
1:51204535|51253877	1	51204535	51253877	8	2_2_1	235	0.064	n/a	/n/a	-
1:51204535|51267349	1	51204535	51267349	8	3_0_4	224	0.067	n/a	/n/a	-
1:51204535|51323669	1	51204535	51323669	5	3_0_3	211	0.045	n/a	/n/a	-
1:51210356|51267349	1	51210356	51267349	4	1_1_2	324	0.024	n/a	/n/a	-
1:51246529|51253877	1	51246529	51253877	8	3_2_0	100	0.138	n/a	/n/a	-
1:51246529|51267349	1	51246529	51267349	16	5_0_5	91	0.26	n/a	/n/a	-
1:51246529|51323669	1	51246529	51323669	5	2_1_1	76	0.116	n/a	/n/a	-
1:51253672|51267349	1	51253672	51267349	170	34_9_33	183	0.65	n/a	/n/a	-
1:51253672|51323669	1	51253672	51323669	22	7_3_6	173	0.203	n/a	/n/a	-
1:51578136|51584473	1	51578136	51584473	5	1_2_2	0	1	n/a	/n/a	+
1:51702406|51735797	1	51702406	51735797	9	5_4_0	41	0.305	n/a	/n/a	+
1:51702406|51737145	1	51702406	51737145	8	4_3_0	40	0.286	n/a	/n/a	+
1:51716897|51717230	1	51716897	51717230	3	1_1_1	10	0.375	n/a	/n/a	+
1:51735628|51737145	1	51735628	51737145	3	2_2_0	69	0.08	n/a	/n/a	+
1:51860053|51866625	1	51860053	51866625	3	2_0_3	19	0.24	n/a	/n/a	-
1:51868107|51874004	1	51868107	51874004	121	19_34_15	38	0.864	n/a	/n/a	-
1:51869091|51871780	1	51869091	51871780	6	1_2_0	192	0.059	n/a	/n/a	-
1:51869091|51874004	1	51869091	51874004	6	1_3_0	74	0.14	n/a	/n/a	-
1:51871577|51874004	1	51871577	51874004	6	3_1_0	76	0.136	n/a	/n/a	-
1:51906019|51913807	1	51906019	51913807	8	3_4_2	33	0.327	n/a	/n/a	-
1:51926763|51930998	1	51926763	51930998	103	5_14_38	26	0.888	n/a	/n/a	-
1:52211208|52215867	1	52211208	52215867	3	2_1_2	146	0.039	n/a	/n/a	+
1:52211208|52227643	1	52211208	52227643	3	1_1_1	133	0.043	n/a	/n/a	+
1:52211208|52231653	1	52211208	52231653	31	12_14_5	130	0.323	n/a	/n/a	+
1:52214041|52231653	1	52214041	52231653	6	0_2_4	52	0.188	n/a	/n/a	+
1:52215174|52237854	1	52215174	52237854	5	0_1_2	39	0.204	n/a	/n/a	+
1:52215817|52227643	1	52215817	52227643	11	0_5_7	116	0.159	n/a	/n/a	+
1:52215817|52231653	1	52215817	52231653	18	2_8_6	115	0.238	n/a	/n/a	+
1:52237742|52238395	1	52237742	52238395	14	5_5_4	60	0.318	n/a	/n/a	+
1:52279707|52282061	1	52279707	52282061	4	0_2_2	34	0.19	n/a	/n/a	-
1:52279707|52299842	1	52279707	52299842	4	1_3_2	41	0.163	n/a	/n/a	-
1:52283738|52289458	1	52283738	52289458	4	0_1_2	47	0.145	n/a	/n/a	-
1:52289336|52299729	1	52289336	52299729	5	4_1_4	119	0.078	n/a	/n/a	-
1:52289336|52299842	1	52289336	52299842	21	8_10_0	69	0.378	n/a	/n/a	-
1:52293468|52299842	1	52293468	52299842	69	10_23_14	70	0.663	n/a	/n/a	-
1:52489163|52494302	1	52489163	52494302	4	1_0_2	36	0.182	n/a	/n/a	-
1:52729445|52747488	1	52729445	52747488	2	1_2_0	32	0.111	n/a	/n/a	+
1:52759125|52769597	1	52759125	52769597	2	1_2_1	27	0.129	n/a	/n/a	+
1:52870353|52874362	1	52870353	52874362	2	1_1_2	7	0.364	n/a	/n/a	+
1:52924008|52933939	1	52924008	52933939	5	1_2_2	12	0.455	n/a	/n/a	-
1:52926806|52927441	1	52926806	52927441	9	1_2_4	44	0.29	n/a	/n/a	-
1:52930742|52937774	1	52930742	52937774	2	1_2_1	18	0.182	n/a	/n/a	-
1:52943380|52947595	1	52943380	52947595	7	2_2_1	13	0.519	n/a	/n/a	-
1:52943380|52954707	1	52943380	52954707	2	1_1_1	15	0.211	n/a	/n/a	-
1:52954581|52975384	1	52954581	52975384	3	2_1_1	59	0.092	n/a	/n/a	-
1:52956404|52975384	1	52956404	52975384	16	5_8_6	58	0.356	n/a	/n/a	-
1:52959283|52962855	1	52959283	52962855	21	2_9_7	417	0.092	n/a	/n/a	-
1:52959283|52975384	1	52959283	52975384	804	19_66_102	139	0.92	n/a	/n/a	-
1:52959283|52981726	1	52959283	52981726	8	1_4_2	100	0.138	n/a	/n/a	-
1:52991235|52992045	1	52991235	52992045	4	1_2_0	5	0.615	n/a	/n/a	-
1:53222130|53245665	1	53222130	53245665	3	1_2_0	25	0.194	n/a	/n/a	+
1:53245525|53250725	1	53245525	53250725	7	3_3_1	17	0.452	n/a	/n/a	+
1:53245525|53262456	1	53245525	53262456	13	5_2_2	17	0.605	n/a	/n/a	+
1:53267491|53267811	1	53267491	53267811	3	2_0_2	1	0.857	n/a	/n/a	+
1:53322670|53326543	1	53322670	53326543	4	2_2_0	38	0.174	n/a	/n/a	+
1:53322670|53329829	1	53322670	53329829	3	2_1_0	29	0.171	n/a	/n/a	+
1:53326403|53333310	1	53326403	53333310	3	1_1_1	27	0.182	n/a	/n/a	+
1:53326403|53333449	1	53326403	53333449	10	3_1_2	19	0.513	n/a	/n/a	+
1:53326403|53352725	1	53326403	53352725	7	4_4_0	91	0.133	n/a	/n/a	+
1:53329653|53333449	1	53329653	53333449	2	2_0_2	18	0.182	n/a	/n/a	+
1:53343354|53347337	1	53343354	53347337	6	3_4_0	79	0.132	n/a	/n/a	+
1:53343354|53358647	1	53343354	53358647	17	9_7_0	23	0.596	n/a	/n/a	+
1:53351505|53358647	1	53351505	53358647	22	2_10_6	65	0.404	n/a	/n/a	+
1:53352628|53358647	1	53352628	53358647	10	0_5_1	75	0.211	n/a	/n/a	+
1:53407468|53427301	1	53407468	53427301	3	1_2_1	4	0.6	n/a	/n/a	+
1:53413681|53427301	1	53413681	53427301	4	1_2_0	4	0.667	n/a	/n/a	+
1:53440441|53453808	1	53440441	53453808	14	2_5_4	23	0.549	n/a	/n/a	+
1:53443889|53446215	1	53443889	53446215	12	5_4_0	39	0.381	n/a	/n/a	+
1:53443889|53453808	1	53443889	53453808	3	2_2_0	41	0.128	n/a	/n/a	+
1:53459075|53459374	1	53459075	53459374	72	17_19_3	129	0.527	n/a	/n/a	-
1:53736700|53737018	1	53736700	53737018	3	2_2_0	20	0.231	n/a	/n/a	-
1:54059781|54065951	1	54059781	54065951	3	2_2_0	8	0.429	n/a	/n/a	-
1:54238002|54254869	1	54238002	54254869	7	3_2_1	34	0.292	n/a	/n/a	-
1:54252831|54262817	1	54252831	54262817	6	3_3_0	35	0.255	n/a	/n/a	-
1:54252831|54266521	1	54252831	54266521	6	1_1_1	49	0.197	n/a	/n/a	-
1:54254806|54262817	1	54254806	54262817	9	2_3_3	37	0.327	n/a	/n/a	-
1:54258902|54262817	1	54258902	54262817	3	0_1_2	30	0.167	n/a	/n/a	-
1:54262362|54262817	1	54262362	54262817	6	1_1_1	50	0.194	n/a	/n/a	-
1:54262362|54266521	1	54262362	54266521	10	2_2_2	64	0.238	n/a	/n/a	-
1:54266366|54269682	1	54266366	54269682	6	3_3_0	46	0.207	n/a	/n/a	-
1:54269601|54298264	1	54269601	54298264	2	1_0_2	44	0.083	n/a	/n/a	-
1:54284644|54291609	1	54284644	54291609	3	1_2_0	95	0.059	n/a	/n/a	-
1:54284644|54298264	1	54284644	54298264	22	5_2_6	55	0.444	n/a	/n/a	-
1:54284644|54301293	1	54284644	54301293	8	3_3_1	43	0.271	n/a	/n/a	-
1:54291471|54298264	1	54291471	54298264	4	2_2_1	40	0.167	n/a	/n/a	-
1:54413461|54418145	1	54413461	54418145	4	0_1_2	62	0.114	n/a	/n/a	+
1:54506429|54509198	1	54506429	54509198	16	0_1_4	207	0.134	n/a	/n/a	-
1:54506429|54513045	1	54506429	54513045	23	3_4_6	122	0.274	n/a	/n/a	-
1:54670691|54675804	1	54670691	54675804	19	6_5_1	423	0.082	n/a	/n/a	+
1:55330976|55341720	1	55330976	55341720	3	2_2_0	130	0.044	n/a	/n/a	-
1:55637229|55643802	1	55637229	55643802	6	3_3_2	44	0.214	n/a	/n/a	-
1:55637229|55643805	1	55637229	55643805	6	2_2_0	44	0.214	n/a	/n/a	-
1:56977648|57002784	1	56977648	57002784	6	5_4_1	3	0.8	n/a	/n/a	-
1:56989495|57002784	1	56989495	57002784	5	0_1_2	14	0.417	n/a	/n/a	-
1:57120677|57140195	1	57120677	57140195	2	1_2_0	6	0.4	n/a	/n/a	+
1:58971732|58993007	1	58971732	58993007	7	3_1_2	92	0.132	n/a	/n/a	-
1:58971732|59000003	1	58971732	59000003	6	4_4_0	78	0.133	n/a	/n/a	-
1:58971732|59002413	1	58971732	59002413	75	24_20_3	46	0.765	n/a	/n/a	-
1:58988499|59002413	1	58988499	59002413	2	1_2_0	28	0.125	n/a	/n/a	-
1:59787208|59812070	1	59787208	59812070	8	3_4_0	30	0.348	n/a	/n/a	+
1:59787208|59844509	1	59787208	59844509	8	4_1_3	8	0.667	n/a	/n/a	+
1:59805630|59812070	1	59805630	59812070	48	12_16_5	50	0.658	n/a	/n/a	+
1:59805630|59844509	1	59805630	59844509	11	3_1_6	28	0.44	n/a	/n/a	+
1:61553821|61743257	1	61553821	61743257	32	6_3_8	68	0.485	n/a	/n/a	+
1:61577043|61624827	1	61577043	61624827	3	0_3_3	11	0.353	n/a	/n/a	+
1:61577043|61743257	1	61577043	61743257	6	1_1_3	67	0.152	n/a	/n/a	+
1:61624547|61624827	1	61624547	61624827	7	3_2_0	24	0.368	n/a	/n/a	+
1:61742823|61743257	1	61742823	61743257	5	2_0_2	68	0.128	n/a	/n/a	+
1:61743192|61818239	1	61743192	61818239	2	0_2_1	240	0.016	n/a	/n/a	+
1:61743192|61824946	1	61743192	61824946	93	11_21_15	73	0.718	n/a	/n/a	+
1:61743192|61849037	1	61743192	61849037	20	4_7_2	39	0.506	n/a	/n/a	+
1:61798184|61824946	1	61798184	61824946	20	3_6_6	119	0.252	n/a	/n/a	+
1:61818122|61824946	1	61818122	61824946	5	2_2_0	207	0.046	n/a	/n/a	+
1:61843369|61849037	1	61843369	61849037	6	3_3_1	10	0.545	n/a	/n/a	+
1:61848909|61872399	1	61848909	61872399	3	2_2_0	48	0.111	n/a	/n/a	+
1:61869776|61872399	1	61869776	61872399	6	2_2_0	31	0.279	n/a	/n/a	+
1:62160369|62175109	1	62160369	62175109	2	0_1_2	17	0.19	n/a	/n/a	-
1:62166606|62189444	1	62166606	62189444	4	1_1_3	26	0.235	n/a	/n/a	-
1:62228530|62241006	1	62228530	62241006	4	0_1_2	10	0.444	n/a	/n/a	+
1:62231998|62241006	1	62231998	62241006	2	2_1_0	34	0.105	n/a	/n/a	+
1:62234955|62241006	1	62234955	62241006	8	2_2_2	46	0.258	n/a	/n/a	+
1:62257020|62267441	1	62257020	62267441	2	2_2_0	32	0.111	n/a	/n/a	+
1:62261139|62263100	1	62261139	62263100	7	1_3_1	10	0.583	n/a	/n/a	+
1:62262959|62274202	1	62262959	62274202	6	3_1_2	18	0.4	n/a	/n/a	+
1:62321702|62367131	1	62321702	62367131	2	1_2_0	15	0.211	n/a	/n/a	+
1:62455840|62483619	1	62455840	62483619	12	5_3_2	34	0.414	n/a	/n/a	+
1:62455840|62503721	1	62455840	62503721	2	1_1_1	27	0.129	n/a	/n/a	+
1:62472938|62483619	1	62472938	62483619	2	1_1_1	29	0.121	n/a	/n/a	+
1:62479015|62483619	1	62479015	62483619	13	3_2_4	30	0.464	n/a	/n/a	+
1:62479015|62516730	1	62479015	62516730	3	2_2_0	41	0.128	n/a	/n/a	+
1:62503649|62550320	1	62503649	62550320	2	0_1_2	40	0.091	n/a	/n/a	+
1:62516638|62550320	1	62516638	62550320	6	1_1_1	28	0.3	n/a	/n/a	+
1:62713144|62717142	1	62713144	62717142	8	2_1_2	27	0.372	n/a	/n/a	-
1:62713144|62718881	1	62713144	62718881	3	2_2_0	45	0.118	n/a	/n/a	-
1:62907159|62907970	1	62907159	62907970	4	1_1_2	19	0.296	n/a	/n/a	+
1:63042933|63044637	1	63042933	63044637	2	0_2_1	35	0.103	n/a	/n/a	-
1:63042933|63052295	1	63042933	63052295	40	10_12_6	14	0.851	n/a	/n/a	-
1:63042933|63091072	1	63042933	63091072	4	1_2_0	9	0.471	n/a	/n/a	-
1:63084377|63091072	1	63084377	63091072	5	3_3_0	9	0.526	n/a	/n/a	-
1:63119396|63119830	1	63119396	63119830	4	0_2_2	2	0.8	n/a	/n/a	-
1:63119396|63128801	1	63119396	63128801	7	1_3_3	2	0.875	n/a	/n/a	-
1:63269390|63270926	1	63269390	63270926	4	2_2_2	10	0.444	n/a	/n/a	+
1:63269390|63276257	1	63269390	63276257	3	1_2_0	3	0.667	n/a	/n/a	+
1:63282246|63286880	1	63282246	63286880	6	1_2_1	11	0.522	n/a	/n/a	+
1:63294711|63307218	1	63294711	63307218	2	2_2_0	3	0.571	n/a	/n/a	+
1:63912477|63955889	1	63912477	63955889	3	1_2_2	21	0.222	n/a	/n/a	-
1:63944435|63955889	1	63944435	63955889	46	4_12_10	29	0.76	n/a	/n/a	-
1:63944435|63974241	1	63944435	63974241	15	3_0_5	23	0.566	n/a	/n/a	-
1:64011587|64016886	1	64011587	64016886	4	2_0_1	2	0.8	n/a	/n/a	+
1:64474977|64516388	1	64474977	64516388	13	1_0_7	1	0.963	n/a	/n/a	+
1:64515363|64516388	1	64515363	64516388	17	6_0_7	5	0.872	n/a	/n/a	+
1:65095038|65107652	1	65095038	65107652	3	1_3_0	4	0.6	n/a	/n/a	+
1:65243306|65243775	1	65243306	65243775	5	2_2_0	44	0.185	n/a	/n/a	+
1:65243306|65255197	1	65243306	65255197	15	4_5_1	13	0.698	n/a	/n/a	+
1:65247063|65255197	1	65247063	65255197	4	2_2_0	50	0.138	n/a	/n/a	+
1:65268659|65280523	1	65268659	65280523	10	3_5_3	18	0.526	n/a	/n/a	+
1:65278421|65280523	1	65278421	65280523	27	7_9_2	29	0.651	n/a	/n/a	+
1:65811294|65831879	1	65811294	65831879	10	4_6_0	72	0.217	n/a	/n/a	+
1:65830318|65831879	1	65830318	65831879	634	84_81_30	96	0.93	n/a	/n/a	+
1:65830318|65845207	1	65830318	65845207	15	6_6_0	42	0.417	n/a	/n/a	+
1:67356837|67371058	1	67356837	67371058	49	9_12_10	10	0.907	n/a	/n/a	-
1:67861088|67865589	1	67861088	67865589	5	2_1_0	34	0.227	n/a	/n/a	-
1:67864288|67865589	1	67864288	67865589	8	1_2_1	51	0.239	n/a	/n/a	-
1:67864288|67868100	1	67864288	67868100	4	1_1_1	26	0.235	n/a	/n/a	-
1:68603463|68624930	1	68603463	68624930	11	3_3_0	331	0.062	n/a	/n/a	-
1:68619200|68620943	1	68619200	68620943	2	2_2_0	110	0.035	n/a	/n/a	-
1:68652223|68659910	1	68652223	68659910	4	2_3_0	52	0.133	n/a	/n/a	-
1:68942517|68954717	1	68942517	68954717	2	1_1_1	5	0.444	n/a	/n/a	-
1:68960113|68960378	1	68960113	68960378	10	5_4_1	3	0.87	n/a	/n/a	-
1:70650468|70654956	1	70650468	70654956	40	14_16_2	14	0.851	n/a	/n/a	-
1:70694105|70698060	1	70694105	70698060	3	1_1_1	25	0.194	n/a	/n/a	+
1:70697951|70705203	1	70697951	70705203	3	2_1_1	41	0.128	n/a	/n/a	+
1:70736539|70742527	1	70736539	70742527	4	1_1_2	14	0.364	n/a	/n/a	-
1:70758071|70766591	1	70758071	70766591	4	3_2_1	83	0.088	n/a	/n/a	-
1:70758071|70771973	1	70758071	70771973	30	11_4_9	84	0.417	n/a	/n/a	-
1:70758071|70781249	1	70758071	70781249	46	12_7_10	23	0.8	n/a	/n/a	-
1:70761813|70771973	1	70761813	70771973	12	6_4_3	140	0.146	n/a	/n/a	-
1:70761813|70781249	1	70761813	70781249	7	2_1_2	82	0.146	n/a	/n/a	-
1:70761813|70790640	1	70761813	70790640	11	3_3_1	95	0.188	n/a	/n/a	-
1:70766447|70779473	1	70766447	70779473	8	3_0_2	165	0.088	n/a	/n/a	-
1:70766447|70781249	1	70766447	70781249	45	13_7_11	125	0.419	n/a	/n/a	-
1:70771907|70781249	1	70771907	70781249	5	1_0_2	77	0.115	n/a	/n/a	-
1:70779428|70790640	1	70779428	70790640	11	2_4_5	92	0.193	n/a	/n/a	-
1:70790536|70801782	1	70790536	70801782	8	2_2_4	22	0.421	n/a	/n/a	-
1:70881639|70887358	1	70881639	70887358	3	1_1_1	39	0.133	n/a	/n/a	+
1:71530652|71535045	1	71530652	71535045	3	2_1_1	25	0.194	n/a	/n/a	-
1:71530756|71535045	1	71530756	71535045	6	1_0_3	25	0.324	n/a	/n/a	-
1:73020894|73023669	1	73020894	73023669	4	2_2_0	0	1	n/a	/n/a	+
1:76211491|76216231	1	76211491	76216231	17	3_6_2	20	0.63	n/a	/n/a	+
1:76215104|76216231	1	76215104	76216231	8	2_1_3	25	0.39	n/a	/n/a	+
1:76253182|76255041	1	76253182	76255041	8	3_3_0	37	0.302	n/a	/n/a	+
1:77620134|77676174	1	77620134	77676174	9	3_1_1	41	0.305	n/a	/n/a	-
1:77620134|77678032	1	77620134	77678032	4	2_0_1	13	0.381	n/a	/n/a	-
1:77672325|77678032	1	77672325	77678032	44	10_4_21	25	0.779	n/a	/n/a	-
1:78041753|78050340	1	78041753	78050340	2	2_0_1	9	0.308	n/a	/n/a	-
1:78045212|78050340	1	78045212	78050340	8	2_2_0	10	0.615	n/a	/n/a	-
1:78092065|78107340	1	78092065	78107340	9	0_2_3	9	0.667	n/a	/n/a	-
1:78098800|78107340	1	78098800	78107340	44	16_12_3	20	0.815	n/a	/n/a	-
1:78105134|78107340	1	78105134	78107340	9	5_4_1	29	0.383	n/a	/n/a	-
1:78177432|78180468	1	78177432	78180468	6	1_2_2	40	0.231	n/a	/n/a	-
1:78181427|78184326	1	78181427	78184326	3	2_0_2	117	0.049	n/a	/n/a	-
1:78183552|78184326	1	78183552	78184326	26	11_1_12	107	0.327	n/a	/n/a	-
1:78183552|78189128	1	78183552	78189128	6	2_2_0	67	0.152	n/a	/n/a	-
1:78183552|78191447	1	78183552	78191447	62	21_22_7	25	0.832	n/a	/n/a	-
1:78183552|78194397	1	78183552	78194397	2	2_2_0	27	0.129	n/a	/n/a	-
1:78195545|78201843	1	78195545	78201843	5	1_2_1	20	0.333	n/a	/n/a	-
1:78200032|78201880	1	78200032	78201880	2	2_2_0	9	0.308	n/a	/n/a	-
1:78204950|78207433	1	78204950	78207433	4	1_1_1	11	0.421	n/a	/n/a	-
1:78267016|78272786	1	78267016	78272786	22	4_2_5	21	0.677	n/a	/n/a	+
1:78267016|78280916	1	78267016	78280916	8	4_2_0	14	0.533	n/a	/n/a	+
1:78268955|78272786	1	78268955	78272786	12	4_5_0	35	0.407	n/a	/n/a	+
1:78324623|78327007	1	78324623	78327007	17	6_5_2	55	0.382	n/a	/n/a	+
1:78324623|78329713	1	78324623	78329713	32	10_13_2	37	0.634	n/a	/n/a	+
1:78324623|78332076	1	78324623	78332076	91	22_4_34	36	0.835	n/a	/n/a	+
1:78338689|78340796	1	78338689	78340796	5	2_3_0	4	0.714	n/a	/n/a	+
1:78478735|78479303	1	78478735	78479303	9	1_5_1	6	0.75	n/a	/n/a	+
1:84412807|84417659	1	84412807	84417659	4	2_2_0	1	0.889	n/a	/n/a	-
1:84644860|84650865	1	84644860	84650865	30	5_4_9	62	0.492	n/a	/n/a	+
1:84644860|84663507	1	84644860	84663507	9	0_2_3	72	0.2	n/a	/n/a	+
1:84644860|84680000	1	84644860	84680000	50	5_14_8	22	0.82	n/a	/n/a	+
1:84662299|84663507	1	84662299	84663507	7	2_2_1	86	0.14	n/a	/n/a	+
1:85816098|85817262	1	85816098	85817262	2	1_1_1	49	0.075	n/a	/n/a	-
1:85816098|85824530	1	85816098	85824530	132	41_26_25	14	0.95	n/a	/n/a	-
1:85816098|85826220	1	85816098	85826220	6	2_1_1	8	0.6	n/a	/n/a	-
1:85816098|85833462	1	85816098	85833462	3	2_2_0	11	0.353	n/a	/n/a	-
1:86142919|86146587	1	86142919	86146587	11	4_2_6	10	0.688	n/a	/n/a	-
1:86241357|86252144	1	86241357	86252144	11	0_3_5	2	0.917	n/a	/n/a	-
1:86426932|86437076	1	86426932	86437076	2	1_0_2	0	1	n/a	/n/a	-
1:86841916|86848879	1	86841916	86848879	4	2_0_1	7	0.533	n/a	/n/a	-
1:87181407|87185318	1	87181407	87185318	22	7_8_1	16	0.733	n/a	/n/a	+
1:87189996|87200862	1	87189996	87200862	3	1_2_0	21	0.222	n/a	/n/a	+
1:89206671|89207666	1	89206671	89207666	4	2_1_1	1	0.889	n/a	/n/a	+
1:89225905|89237562	1	89225905	89237562	6	2_2_0	57	0.174	n/a	/n/a	+
1:89236035|89237562	1	89236035	89237562	11	2_4_1	54	0.289	n/a	/n/a	+
1:89236035|89251896	1	89236035	89251896	11	3_2_2	23	0.489	n/a	/n/a	+
1:89250322|89251896	1	89250322	89251896	46	14_10_5	67	0.579	n/a	/n/a	+
1:89250322|89255736	1	89250322	89255736	8	2_1_3	50	0.242	n/a	/n/a	+
1:89272996|89287686	1	89272996	89287686	13	2_0_2	13	0.667	n/a	/n/a	+
1:89318790|89319029	1	89318790	89319029	4	1_2_0	12	0.4	n/a	/n/a	-
1:90309197|90312217	1	90309197	90312217	13	6_7_0	31	0.456	n/a	/n/a	+
1:91356594|91383711	1	91356594	91383711	7	1_4_3	26	0.35	n/a	/n/a	-
1:91382197|91383711	1	91382197	91383711	407	66_46_39	50	0.942	n/a	/n/a	-
1:91382197|91385863	1	91382197	91385863	2	2_1_1	29	0.121	n/a	/n/a	-
1:91382317|91383711	1	91382317	91383711	6	2_2_0	844	0.014	n/a	/n/a	-
1:91967211|91981433	1	91967211	91981433	2	2_0_2	5	0.444	n/a	/n/a	+
1:92327028|92327201	1	92327028	92327201	9	2_3_3	25	0.419	n/a	/n/a	-
1:92554255|92573558	1	92554255	92573558	4	1_1_1	7	0.533	n/a	/n/a	+
1:92554255|92595333	1	92554255	92595333	7	2_1_1	2	0.875	n/a	/n/a	+
1:92752047|92757094	1	92752047	92757094	3	3_3_0	5	0.545	n/a	/n/a	-
1:92772745|92811471	1	92772745	92811471	2	2_0_1	164	0.024	n/a	/n/a	+
1:92786156|92811471	1	92786156	92811471	9	1_2_5	167	0.097	n/a	/n/a	+
1:92798948|92811471	1	92798948	92811471	48	12_10_20	260	0.27	n/a	/n/a	+
1:92798948|92829327	1	92798948	92829327	48	7_2_17	123	0.438	n/a	/n/a	+
1:92798948|92846430	1	92798948	92846430	500	34_71_56	146	0.873	n/a	/n/a	+
1:92798973|92811471	1	92798973	92811471	2	1_1_2	306	0.013	n/a	/n/a	+
1:92798973|92829327	1	92798973	92829327	4	2_0_2	178	0.043	n/a	/n/a	+
1:92798973|92846430	1	92798973	92846430	18	2_12_7	201	0.152	n/a	/n/a	+
1:92948421|92949143	1	92948421	92949143	3	2_2_0	0	1	n/a	/n/a	-
1:93070864|93073284	1	93070864	93073284	24	5_7_2	4	0.923	n/a	/n/a	-
1:93159359|93202184	1	93159359	93202184	4	1_2_0	23	0.258	n/a	/n/a	-
1:93167698|93170301	1	93167698	93170301	6	2_2_1	15	0.444	n/a	/n/a	-
1:93167698|93202184	1	93167698	93202184	2	0_1_2	18	0.182	n/a	/n/a	-
1:93191155|93202184	1	93191155	93202184	10	3_3_2	9	0.69	n/a	/n/a	-
1:93201955|93202184	1	93201955	93202184	9	4_4_0	15	0.545	n/a	/n/a	-
1:93201955|93211359	1	93201955	93211359	2	2_2_0	7	0.364	n/a	/n/a	-
1:93301747|93303190	1	93301747	93303190	27	8_8_1	49	0.524	n/a	/n/a	+
1:93575787|93580645	1	93575787	93580645	14	2_2_0	65	0.301	n/a	/n/a	+
1:93620213|93625783	1	93620213	93625783	10	5_2_4	12	0.625	n/a	/n/a	-
1:93765001|93771027	1	93765001	93771027	5	2_1_0	8	0.556	n/a	/n/a	-
1:93790192|93805236	1	93790192	93805236	4	1_0_2	23	0.258	n/a	/n/a	-
1:93804914|93805236	1	93804914	93805236	7	2_1_0	20	0.412	n/a	/n/a	-
1:94032836|94033408	1	94032836	94033408	406	62_42_24	72	0.919	n/a	/n/a	-
1:94037227|94037398	1	94037227	94037398	6	2_1_0	53	0.185	n/a	/n/a	-
1:94037227|94041686	1	94037227	94041686	24	12_6_5	81	0.372	n/a	/n/a	-
1:94037227|94049678	1	94037227	94049678	2	2_2_0	102	0.038	n/a	/n/a	-
1:94047858|94049678	1	94047858	94049678	8	2_2_2	128	0.111	n/a	/n/a	-
1:94107860|94140497	1	94107860	94140497	241	9_56_59	114	0.809	n/a	/n/a	-
1:94132652|94140497	1	94132652	94140497	10	5_4_0	53	0.274	n/a	/n/a	-
1:94140170|94140497	1	94140170	94140497	67	23_23_1	153	0.467	n/a	/n/a	-
1:94360170|94363454	1	94360170	94363454	56	14_7_18	148	0.431	n/a	/n/a	-
1:94360170|94367225	1	94360170	94367225	89	25_18_25	54	0.767	n/a	/n/a	-
1:94360170|94370144	1	94360170	94370144	19	6_3_6	36	0.514	n/a	/n/a	-
1:94362174|94370144	1	94362174	94370144	9	3_2_1	213	0.078	n/a	/n/a	-
1:94369321|94370144	1	94369321	94370144	3	3_1_0	5	0.545	n/a	/n/a	-
1:94650898|94654497	1	94650898	94654497	2	1_1_1	6	0.4	n/a	/n/a	-
1:94685814|94697199	1	94685814	94697199	77	25_26_3	20	0.885	n/a	/n/a	-
1:94696963|94697199	1	94696963	94697199	4	2_2_0	31	0.205	n/a	/n/a	-
1:94924163|94941293	1	94924163	94941293	30	1_9_9	37	0.619	n/a	/n/a	+
1:94924163|94943871	1	94924163	94943871	7	1_0_3	30	0.318	n/a	/n/a	+
1:94924163|94946162	1	94924163	94946162	14	1_7_7	40	0.412	n/a	/n/a	+
1:94953098|94956803	1	94953098	94956803	114	10_9_39	60	0.792	n/a	/n/a	+
1:95603831|95616975	1	95603831	95616975	6	2_1_2	102	0.105	n/a	/n/a	+
1:95603831|95639445	1	95603831	95639445	37	9_1_9	47	0.612	n/a	/n/a	+
1:95609447|95616975	1	95609447	95616975	109	31_17_12	124	0.637	n/a	/n/a	+
1:95609447|95639445	1	95609447	95639445	69	20_6_19	67	0.673	n/a	/n/a	+
1:97235259|97236407	1	97235259	97236407	36	13_13_0	21	0.774	n/a	/n/a	+
1:97235259|97250810	1	97235259	97250810	11	4_4_0	9	0.71	n/a	/n/a	+
1:97839117|97848017	1	97839117	97848017	20	2_4_7	7	0.851	n/a	/n/a	-
1:97981282|98015300	1	97981282	98015300	30	13_12_1	22	0.732	n/a	/n/a	-
1:97981282|98039526	1	97981282	98039526	6	3_4_0	13	0.48	n/a	/n/a	-
1:98015116|98015300	1	98015116	98015300	3	0_1_2	33	0.154	n/a	/n/a	-
1:98015116|98039526	1	98015116	98039526	8	3_3_0	24	0.4	n/a	/n/a	-
1:98015116|98060722	1	98015116	98060722	8	4_2_1	14	0.533	n/a	/n/a	-
1:98144651|98165103	1	98144651	98165103	18	0_4_6	5	0.878	n/a	/n/a	-
1:99203793|99203945	1	99203793	99203945	3	2_2_0	7	0.462	n/a	/n/a	+
1:100459093|100464971	1	100459093	100464971	49	14_15_5	30	0.766	n/a	/n/a	+
1:100476921|100483371	1	100476921	100483371	3	2_2_0	15	0.286	n/a	/n/a	+
1:100480858|100483371	1	100480858	100483371	3	2_2_0	49	0.109	n/a	/n/a	+
1:100508629|100515560	1	100508629	100515560	3	1_1_1	35	0.146	n/a	/n/a	+
1:100515465|100535241	1	100515465	100535241	15	4_4_3	29	0.508	n/a	/n/a	+
1:100661770|100672192	1	100661770	100672192	3	2_1_1	6	0.5	n/a	/n/a	-
1:100696289|100706440	1	100696289	100706440	3	1_1_1	5	0.545	n/a	/n/a	-
1:101362126|101387397	1	101362126	101387397	2	1_2_1	23	0.148	n/a	/n/a	+
1:101372408|101387397	1	101372408	101387397	17	3_5_0	25	0.576	n/a	/n/a	+
1:101376619|101379362	1	101376619	101379362	4	1_2_1	82	0.089	n/a	/n/a	+
1:101376619|101387397	1	101376619	101387397	6	2_2_0	38	0.24	n/a	/n/a	+
1:101377668|101387397	1	101377668	101387397	3	1_1_1	54	0.1	n/a	/n/a	+
1:101379219|101387397	1	101379219	101387397	20	6_6_3	43	0.482	n/a	/n/a	+
1:101427384|101431474	1	101427384	101431474	3	2_2_0	13	0.316	n/a	/n/a	+
1:108686165|108703915	1	108686165	108703915	7	2_1_2	41	0.255	n/a	/n/a	-
1:108686165|108728576	1	108686165	108728576	7	7_3_2	42	0.25	n/a	/n/a	-
1:108690901|108703915	1	108690901	108703915	55	12_15_12	49	0.692	n/a	/n/a	-
1:108697605|108703915	1	108697605	108703915	6	4_3_0	70	0.146	n/a	/n/a	-
1:108697605|108724650	1	108697605	108724650	6	4_1_1	144	0.077	n/a	/n/a	-
1:108697605|108728576	1	108697605	108728576	26	10_9_2	71	0.423	n/a	/n/a	-
1:108724563|108728576	1	108724563	108728576	63	8_14_14	93	0.575	n/a	/n/a	-
1:108724563|108738102	1	108724563	108738102	40	12_2_17	66	0.548	n/a	/n/a	-
1:108724563|108741687	1	108724563	108741687	3	0_1_2	63	0.087	n/a	/n/a	-
1:109167267|109172279	1	109167267	109172279	4	2_0_2	15	0.348	n/a	/n/a	+
1:109192833|109200201	1	109192833	109200201	3	1_1_1	56	0.097	n/a	/n/a	-
1:109192833|109202584	1	109192833	109202584	2	2_2_0	15	0.211	n/a	/n/a	-
1:109200073|109202584	1	109200073	109202584	17	6_4_5	40	0.459	n/a	/n/a	-
1:109336204|109342927	1	109336204	109342927	2	2_1_1	5	0.444	n/a	/n/a	+
1:109439486|109446876	1	109439486	109446876	7	2_2_0	4	0.778	n/a	/n/a	+
1:109444412|109446876	1	109444412	109446876	3	2_1_0	2	0.75	n/a	/n/a	+
1:109486097|109486679	1	109486097	109486679	3	2_2_0	9	0.4	n/a	/n/a	-
1:109544846|109547337	1	109544846	109547337	5	2_2_1	1	0.909	n/a	/n/a	-
1:109753418|109753741	1	109753418	109753741	14	3_6_0	2	0.933	n/a	/n/a	-
1:109766604|109772198	1	109766604	109772198	3	2_2_0	418	0.014	n/a	/n/a	+
1:109869614|109888503	1	109869614	109888503	5	2_2_0	105	0.087	n/a	/n/a	-
1:109878862|109888500	1	109878862	109888500	5	2_2_3	114	0.081	n/a	/n/a	-
1:109878862|109888503	1	109878862	109888503	5	2_2_0	114	0.081	n/a	/n/a	-
1:109883346|109888500	1	109883346	109888500	13	3_3_1	95	0.215	n/a	/n/a	-
1:109883346|109888503	1	109883346	109888503	7	2_1_1	95	0.128	n/a	/n/a	-
1:109884636|109888500	1	109884636	109888500	9	6_5_0	175	0.093	n/a	/n/a	-
1:109884636|109888503	1	109884636	109888503	12	5_5_1	175	0.121	n/a	/n/a	-
1:109893551|109898091	1	109893551	109898091	6	2_2_2	78	0.133	n/a	/n/a	-
1:110125059|110129504	1	110125059	110129504	2	1_2_1	32	0.111	n/a	/n/a	+
1:110203787|110233186	1	110203787	110233186	3	2_2_0	26	0.188	n/a	/n/a	+
1:110765586|110768800	1	110765586	110768800	9	5_2_0	2	0.9	n/a	/n/a	+
1:111668849|111674190	1	111668849	111674190	5	0_1_2	6	0.625	n/a	/n/a	-
1:111690264|111717585	1	111690264	111717585	10	3_1_2	5	0.8	n/a	/n/a	+
1:112269989|112270426	1	112269989	112270426	6	2_2_0	6	0.667	n/a	/n/a	-
1:113119608|113125094	1	113119608	113125094	3	1_1_2	14	0.3	n/a	/n/a	-
1:113119608|113143470	1	113119608	113143470	2	1_0_2	6	0.4	n/a	/n/a	-
1:113134147|113140708	1	113134147	113140708	5	0_2_4	24	0.294	n/a	/n/a	-
1:113134147|113143470	1	113134147	113143470	4	1_1_2	20	0.286	n/a	/n/a	-
1:113145317|113153625	1	113145317	113153625	2	1_2_1	15	0.211	n/a	/n/a	-
1:113153463|113159517	1	113153463	113159517	4	2_2_0	29	0.216	n/a	/n/a	-
1:113196220|113202401	1	113196220	113202401	30	6_7_6	4	0.938	n/a	/n/a	+
1:113196220|113209767	1	113196220	113209767	8	3_2_2	1	0.941	n/a	/n/a	+
1:113464612|113471974	1	113464612	113471974	8	2_3_0	50	0.242	n/a	/n/a	-
1:113655101|113662145	1	113655101	113662145	12	2_2_0	12	0.667	n/a	/n/a	+
1:114214356|114216087	1	114214356	114216087	12	2_6_3	10	0.706	n/a	/n/a	+
1:114246703|114249344	1	114246703	114249344	11	1_3_0	2	0.917	n/a	/n/a	-
1:114248512|114253097	1	114248512	114253097	6	2_1_0	5	0.706	n/a	/n/a	-
1:114319832|114320430	1	114319832	114320430	15	4_4_1	8	0.789	n/a	/n/a	-
1:114339985|114340658	1	114339985	114340658	3	2_2_0	0	1	n/a	/n/a	-
1:114998835|115007010	1	114998835	115007010	3	0_1_2	21	0.222	n/a	/n/a	-
1:115005726|115006178	1	115005726	115006178	15	9_9_0	132	0.185	n/a	/n/a	-
1:115005726|115007010	1	115005726	115007010	178	40_34_20	38	0.904	n/a	/n/a	-
1:115005726|115019709	1	115005726	115019709	15	6_5_2	22	0.577	n/a	/n/a	-
1:115262200|115263338	1	115262200	115263338	5	2_1_1	165	0.057	n/a	/n/a	-
1:115292442|115292828	1	115292442	115292828	3	2_1_0	118	0.048	n/a	/n/a	-
1:116202262|116206889	1	116202262	116206889	10	4_3_2	27	0.426	n/a	/n/a	+
1:116526161|116534864	1	116526161	116534864	3	2_1_0	3	0.667	n/a	/n/a	+
1:116526170|116534864	1	116526170	116534864	8	5_5_0	3	0.842	n/a	/n/a	+
1:116534652|116563506	1	116534652	116563506	2	2_2_0	40	0.091	n/a	/n/a	+
1:116562203|116563506	1	116562203	116563506	16	9_6_1	28	0.533	n/a	/n/a	+
1:116573987|116580009	1	116573987	116580009	8	2_2_0	19	0.457	n/a	/n/a	+
1:116574024|116580009	1	116574024	116580009	16	5_6_2	31	0.508	n/a	/n/a	+
1:116576379|116580009	1	116576379	116580009	16	2_1_4	24	0.571	n/a	/n/a	+
1:117078587|117087226	1	117078587	117087226	6	2_2_0	4	0.75	n/a	/n/a	-
1:117626640|117629144	1	117626640	117629144	7	4_3_0	6	0.7	n/a	/n/a	+
1:117654717|117658311	1	117654717	117658311	3	1_2_0	16	0.273	n/a	/n/a	-
1:117944808|117957453	1	117944808	117957453	5	1_2_2	130	0.071	n/a	/n/a	+
1:117944808|117963271	1	117944808	117963271	26	0_3_11	48	0.52	n/a	/n/a	+
1:117944808|117984947	1	117944808	117984947	17	2_7_7	26	0.567	n/a	/n/a	+
1:117957335|117984947	1	117957335	117984947	10	2_2_5	85	0.19	n/a	/n/a	+
1:117984853|118009049	1	117984853	118009049	4	1_2_1	31	0.205	n/a	/n/a	+
1:118035769|118045592	1	118035769	118045592	9	4_5_2	14	0.562	n/a	/n/a	+
1:118449128|118461358	1	118449128	118461358	26	3_11_6	48	0.52	n/a	/n/a	-
1:118454616|118461358	1	118454616	118461358	29	2_11_5	40	0.592	n/a	/n/a	-
1:119805525|119817929	1	119805525	119817929	2	1_2_1	18	0.182	n/a	/n/a	+
1:119805525|119820595	1	119805525	119820595	45	1_10_21	15	0.857	n/a	/n/a	+
1:119870754|119873293	1	119870754	119873293	4	2_2_0	0	1	n/a	/n/a	+
1:120277257|120279889	1	120277257	120279889	5	3_3_0	1558	0.006	n/a	/n/a	+
1:144013901|144053668	1	144013901	144053668	4	3_1_0	41	0.163	n/a	/n/a	+
1:144595835|144596473	1	144595835	144596473	9	2_2_2	67	0.212	n/a	/n/a	+
1:144921835|144922638	1	144921835	144922638	9	5_5_0	6	0.75	n/a	/n/a	-
1:145227041|145281704	1	145227041	145281704	8	2_3_0	4	0.8	n/a	/n/a	+
1:145487304|145492375	1	145487304	145492375	4	2_3_1	26	0.235	n/a	/n/a	+
1:145580188|145581564	1	145580188	145581564	6	2_2_1	39	0.235	n/a	/n/a	+
1:145592633|145594188	1	145592633	145594188	4	2_2_0	20	0.286	n/a	/n/a	-
1:145592633|145595220	1	145592633	145595220	18	5_1_2	17	0.679	n/a	/n/a	-
1:145646115|145663367	1	145646115	145663367	11	0_4_3	34	0.393	n/a	/n/a	+
1:145682023|145684678	1	145682023	145684678	6	2_0_4	36	0.25	n/a	/n/a	+
1:145682023|145687091	1	145682023	145687091	4	1_2_1	36	0.182	n/a	/n/a	+
1:146724278|146731572	1	146724278	146731572	92	21_18_21	14	0.929	n/a	/n/a	+
1:146731491|146739177	1	146731491	146739177	5	0_1_3	22	0.312	n/a	/n/a	+
1:146757886|146759412	1	146757886	146759412	3	1_2_0	16	0.273	n/a	/n/a	+
1:148558164|148558805	1	148558164	148558805	10	1_1_2	25	0.444	n/a	/n/a	+
1:150048311|150049857	1	150048311	150049857	3	1_1_1	12	0.333	n/a	/n/a	+
1:150064031|150082742	1	150064031	150082742	4	1_2_0	54	0.129	n/a	/n/a	+
1:150202906|150204264	1	150202906	150204264	21	9_9_1	16	0.724	n/a	/n/a	-
1:150381382|150390201	1	150381382	150390201	5	1_2_0	12	0.455	n/a	/n/a	+
1:150413399|150415759	1	150413399	150415759	2	1_0_2	23	0.148	n/a	/n/a	+
1:150413399|150416853	1	150413399	150416853	29	8_9_8	46	0.558	n/a	/n/a	+
1:150429764|150430046	1	150429764	150430046	26	4_10_0	57	0.477	n/a	/n/a	+
1:150432536|150432793	1	150432536	150432793	5	2_4_2	63	0.137	n/a	/n/a	+
1:150470006|150471510	1	150470006	150471510	5	1_1_1	135	0.069	n/a	/n/a	+
1:150470006|150471769	1	150470006	150471769	6	2_0_2	156	0.071	n/a	/n/a	+
1:150507422|150507649	1	150507422	150507649	3	2_3_0	11	0.353	n/a	/n/a	-
1:150634290|150636239	1	150634290	150636239	10	4_5_1	17	0.541	n/a	/n/a	-
1:150790396|150795821	1	150790396	150795821	11	3_3_0	33	0.4	n/a	/n/a	-
1:150790396|150799093	1	150790396	150799093	8	3_3_0	36	0.308	n/a	/n/a	-
1:150902443|150913904	1	150902443	150913904	22	10_7_6	60	0.423	n/a	/n/a	+
1:150997087|150998149	1	150997087	150998149	26	11_9_1	53	0.495	n/a	/n/a	+
1:150997087|150999803	1	150997087	150999803	18	8_3_4	40	0.474	n/a	/n/a	+
1:150999709|151001420	1	150999709	151001420	14	3_4_2	17	0.622	n/a	/n/a	+
1:151060666|151070478	1	151060666	151070478	6	2_2_0	12	0.5	n/a	/n/a	+
1:151060666|151079698	1	151060666	151079698	6	1_2_2	12	0.5	n/a	/n/a	+
1:151139410|151139890	1	151139410	151139890	22	9_5_10	258	0.146	n/a	/n/a	+
1:151157982|151158426	1	151157982	151158426	10	2_3_1	264	0.07	n/a	/n/a	-
1:151196721|151205179	1	151196721	151205179	10	0_4_1	42	0.323	n/a	/n/a	+
1:151204724|151205179	1	151204724	151205179	2	1_2_0	33	0.108	n/a	/n/a	+
1:151209034|151209239	1	151209034	151209239	20	6_7_1	19	0.678	n/a	/n/a	+
1:151214599|151215043	1	151214599	151215043	14	6_6_0	34	0.452	n/a	/n/a	+
1:151234637|151236504	1	151234637	151236504	8	3_4_0	86	0.157	n/a	/n/a	+
1:151278612|151278839	1	151278612	151278839	6	1_0_2	87	0.121	n/a	/n/a	-
1:151288049|151288985	1	151288049	151288985	3	2_2_0	113	0.05	n/a	/n/a	-
1:151395873|151414681	1	151395873	151414681	3	2_1_0	16	0.273	n/a	/n/a	-
1:151413404|151414681	1	151413404	151414681	8	3_3_3	17	0.485	n/a	/n/a	-
1:151413404|151431737	1	151413404	151431737	2	2_2_0	14	0.222	n/a	/n/a	-
1:151611364|151611595	1	151611364	151611595	447	53_53_21	69	0.928	n/a	/n/a	+
1:151611364|151641111	1	151611364	151641111	17	1_6_0	64	0.347	n/a	/n/a	+
1:151611364|151655921	1	151611364	151655921	9	1_0_5	70	0.205	n/a	/n/a	+
1:151630711|151630903	1	151630711	151630903	11	3_5_2	45	0.328	n/a	/n/a	+
1:151630711|151634746	1	151630711	151634746	5	3_1_2	50	0.167	n/a	/n/a	+
1:151630711|151641111	1	151630711	151641111	17	9_8_0	33	0.507	n/a	/n/a	+
1:151630711|151655921	1	151630711	151655921	13	6_3_2	40	0.394	n/a	/n/a	+
1:153610771|153614905	1	153610771	153614905	5	4_3_0	205	0.047	n/a	/n/a	+
1:153637696|153641033	1	153637696	153641033	10	1_1_2	121	0.142	n/a	/n/a	-
1:153713127|153713844	1	153713127	153713844	4	1_1_3	43	0.157	n/a	/n/a	+
1:153723571|153730239	1	153723571	153730239	9	5_5_1	89	0.168	n/a	/n/a	+
1:153724755|153732089	1	153724755	153732089	2	1_0_2	55	0.068	n/a	/n/a	+
1:153727118|153730239	1	153727118	153730239	14	3_6_1	77	0.267	n/a	/n/a	+
1:153791267|153792211	1	153791267	153792211	20	5_6_2	14	0.741	n/a	/n/a	-
1:154184934|154187050	1	154184934	154187050	2	2_2_0	378	0.01	n/a	/n/a	-
1:154197560|154201201	1	154197560	154201201	7	3_2_2	31	0.311	n/a	/n/a	+
1:154213989|154218851	1	154213989	154218851	32	5_13_6	87	0.424	n/a	/n/a	+
1:154238977|154241430	1	154238977	154241430	3	1_1_1	4	0.6	n/a	/n/a	+
1:154569281|154575102	1	154569281	154575102	4	1_0_2	97	0.076	n/a	/n/a	-
1:155235651|155236686	1	155235651	155236686	8	2_4_0	6	0.727	n/a	/n/a	-
1:155319118|155324421	1	155319118	155324421	4	2_2_0	5	0.615	n/a	/n/a	-
1:155322497|155324421	1	155322497	155324421	14	5_4_1	14	0.667	n/a	/n/a	-
1:155364601|155365344	1	155364601	155365344	2	1_2_1	6	0.4	n/a	/n/a	-
1:155377929|155385714	1	155377929	155385714	5	1_2_1	13	0.435	n/a	/n/a	-
1:155377933|155385714	1	155377933	155385714	13	5_5_1	13	0.667	n/a	/n/a	-
1:155385535|155385714	1	155385535	155385714	8	2_1_2	18	0.471	n/a	/n/a	-
1:155408118|155408859	1	155408118	155408859	7	4_3_0	19	0.424	n/a	/n/a	-
1:155408118|155429689	1	155408118	155429689	17	5_4_2	14	0.708	n/a	/n/a	-
1:155490891|155491409	1	155490891	155491409	8	2_3_0	18	0.471	n/a	/n/a	-
1:155582209|155717687	1	155582209	155717687	14	2_7_0	23	0.549	n/a	/n/a	+
1:155638418|155640255	1	155638418	155640255	7	2_2_0	28	0.333	n/a	/n/a	-
1:155640111|155642522	1	155640111	155642522	12	8_5_1	13	0.649	n/a	/n/a	-
1:155640111|155642548	1	155640111	155642548	2	1_2_0	10	0.286	n/a	/n/a	-
1:155640111|155644887	1	155640111	155644887	7	6_1_2	46	0.233	n/a	/n/a	-
1:155640111|155649303	1	155640111	155649303	4	1_1_1	73	0.099	n/a	/n/a	-
1:155640111|155744964	1	155640111	155744964	4	3_3_1	10	0.444	n/a	/n/a	-
1:155640111|155753880	1	155640111	155753880	4	1_1_1	15	0.348	n/a	/n/a	-
1:155644801|155649303	1	155644801	155649303	9	2_3_3	86	0.173	n/a	/n/a	-
1:155646339|155649303	1	155646339	155649303	232	43_28_27	100	0.823	n/a	/n/a	-
1:155646339|155650247	1	155646339	155650247	9	2_0_4	66	0.214	n/a	/n/a	-
1:155646339|155753880	1	155646339	155753880	37	16_11_5	50	0.597	n/a	/n/a	-
1:155679564|155691409	1	155679564	155691409	4	0_2_2	146	0.052	n/a	/n/a	+
1:155679564|155697529	1	155679564	155697529	5	0_2_1	123	0.075	n/a	/n/a	+
1:155686797|155695810	1	155686797	155695810	8	4_2_3	145	0.099	n/a	/n/a	+
1:155691308|155695810	1	155691308	155695810	54	12_7_17	127	0.46	n/a	/n/a	+
1:155695173|155695810	1	155695173	155695810	114	27_27_16	170	0.573	n/a	/n/a	+
1:155734791|155736500	1	155734791	155736500	4	2_2_0	7	0.533	n/a	/n/a	-
1:155746186|155753880	1	155746186	155753880	6	1_2_2	12	0.5	n/a	/n/a	-
1:155747413|155753880	1	155747413	155753880	29	12_5_4	15	0.795	n/a	/n/a	-
1:155783425|155784240	1	155783425	155784240	35	11_9_1	5	0.933	n/a	/n/a	-
1:155823067|155823597	1	155823067	155823597	103	30_32_3	33	0.862	n/a	/n/a	-
1:155885664|155887463	1	155885664	155887463	4	2_2_0	44	0.154	n/a	/n/a	-
1:155891166|155891709	1	155891166	155891709	33	10_0_14	52	0.559	n/a	/n/a	-
1:155891166|155895634	1	155891166	155895634	4	3_3_0	41	0.163	n/a	/n/a	-
1:155895423|155896947	1	155895423	155896947	3	2_0_2	31	0.162	n/a	/n/a	-
1:155896467|155896947	1	155896467	155896947	17	7_4_2	26	0.567	n/a	/n/a	-
1:155927504|155928187	1	155927504	155928187	4	1_0_2	284	0.027	n/a	/n/a	-
1:156169626|156170263	1	156169626	156170263	16	6_6_1	57	0.36	n/a	/n/a	+
1:156202111|156203519	1	156202111	156203519	15	6_5_3	303	0.09	n/a	/n/a	+
1:156286957|156287338	1	156286957	156287338	8	1_1_2	468	0.033	n/a	/n/a	-
1:156290630|156304709	1	156290630	156304709	15	7_1_7	238	0.112	n/a	/n/a	-
1:156294763|156304709	1	156294763	156304709	5	2_0_2	298	0.032	n/a	/n/a	-
1:156303338|156304709	1	156303338	156304709	72	14_3_26	316	0.313	n/a	/n/a	-
1:156303338|156305679	1	156303338	156305679	12	4_0_7	260	0.085	n/a	/n/a	-
1:156303372|156304709	1	156303372	156304709	2	2_0_1	386	0.01	n/a	/n/a	-
1:156444900|156446994	1	156444900	156446994	5	1_4_0	59	0.145	n/a	/n/a	-
1:156921365|156925591	1	156921365	156925591	7	2_1_1	13	0.519	n/a	/n/a	-
1:156921365|156925594	1	156921365	156925594	5	1_1_2	13	0.435	n/a	/n/a	-
1:159888553|159890327	1	159888553	159890327	31	8_6_0	481	0.114	n/a	/n/a	-
1:160293221|160302347	1	160293221	160302347	55	16_18_13	341	0.244	n/a	/n/a	-
1:160293221|160305112	1	160293221	160305112	5	2_0_2	226	0.042	n/a	/n/a	-
1:161071838|161072165	1	161071838	161072165	8	2_1_0	69	0.188	n/a	/n/a	-
1:161293404|161298287	1	161293404	161298287	3	1_1_2	48	0.111	n/a	/n/a	+
1:161721656|161723051	1	161721656	161723051	4	1_2_0	13	0.381	n/a	/n/a	+
1:161722158|161723051	1	161722158	161723051	6	1_2_1	9	0.571	n/a	/n/a	+
1:161748034|161753886	1	161748034	161753886	10	2_5_4	78	0.204	n/a	/n/a	+
1:161771842|161790951	1	161771842	161790951	10	6_2_3	18	0.526	n/a	/n/a	+
1:161789423|161790951	1	161789423	161790951	6	3_2_1	31	0.279	n/a	/n/a	+
1:161816239|161823113	1	161816239	161823113	3	2_2_0	33	0.154	n/a	/n/a	+
1:161816239|161833102	1	161816239	161833102	8	3_1_2	27	0.372	n/a	/n/a	+
1:161821512|161833102	1	161821512	161833102	5	2_3_0	39	0.204	n/a	/n/a	+
1:162257134|162270496	1	162257134	162270496	3	1_0_2	13	0.316	n/a	/n/a	+
1:162567582|162625164	1	162567582	162625164	3	0_2_1	35	0.146	n/a	/n/a	+
1:162722885|162725559	1	162722885	162725559	2	0_1_2	64	0.059	n/a	/n/a	+
1:164776779|164790863	1	164776779	164790863	5	3_0_3	44	0.185	n/a	/n/a	+
1:165648679|165652347	1	165648679	165652347	80	26_22_2	85	0.653	n/a	/n/a	-
1:165648679|165664634	1	165648679	165664634	8	4_4_0	105	0.132	n/a	/n/a	-
1:165649724|165664634	1	165649724	165664634	7	4_5_0	186	0.07	n/a	/n/a	-
1:165859441|165865569	1	165859441	165865569	12	4_5_2	58	0.293	n/a	/n/a	+
1:165865427|165875206	1	165865427	165875206	2	2_0_2	60	0.062	n/a	/n/a	+
1:167515338|167517358	1	167515338	167517358	6	3_2_0	22	0.353	n/a	/n/a	-
1:167734820|167742605	1	167734820	167742605	29	8_5_2	19	0.753	n/a	/n/a	+
1:167734820|167745403	1	167734820	167745403	42	16_13_5	13	0.866	n/a	/n/a	+
1:167734820|167757374	1	167734820	167757374	5	1_2_0	47	0.175	n/a	/n/a	+
1:167741512|167745403	1	167741512	167745403	13	7_4_3	32	0.448	n/a	/n/a	+
1:167741512|167757374	1	167741512	167757374	2	2_1_0	66	0.057	n/a	/n/a	+
1:167889217|167893775	1	167889217	167893775	2	2_0_2	54	0.069	n/a	/n/a	-
1:167921038|167944253	1	167921038	167944253	118	10_33_4	25	0.904	n/a	/n/a	+
1:167935867|167944253	1	167935867	167944253	290	36_59_6	21	0.965	n/a	/n/a	+
1:167971720|167974031	1	167971720	167974031	8	2_3_0	6	0.727	n/a	/n/a	+
1:167985019|167992285	1	167985019	167992285	2	2_0_1	6	0.4	n/a	/n/a	+
1:167988783|167992285	1	167988783	167992285	7	3_2_3	9	0.609	n/a	/n/a	+
1:168073715|168074132	1	168073715	168074132	4	2_2_0	8	0.5	n/a	/n/a	-
1:168153140|168169338	1	168153140	168169338	4	2_1_0	28	0.222	n/a	/n/a	+
1:168200752|168208398	1	168200752	168208398	16	2_0_7	18	0.64	n/a	/n/a	+
1:168205827|168212307	1	168205827	168212307	3	0_1_2	22	0.214	n/a	/n/a	+
1:168260398|168267023	1	168260398	168267023	4	3_1_0	7	0.533	n/a	/n/a	+
1:169199956|169256646	1	169199956	169256646	36	10_13_5	18	0.8	n/a	/n/a	-
1:169199956|169268001	1	169199956	169268001	8	3_3_3	19	0.457	n/a	/n/a	-
1:169267794|169293738	1	169267794	169293738	3	2_2_0	10	0.375	n/a	/n/a	-
1:169279208|169293738	1	169279208	169293738	2	2_1_1	5	0.444	n/a	/n/a	-
1:169288397|169293738	1	169288397	169293738	2	2_1_1	0	1	n/a	/n/a	-
1:169292355|169293738	1	169292355	169293738	12	5_5_0	11	0.686	n/a	/n/a	-
1:169446393|169446995	1	169446393	169446995	16	6_6_0	1	0.97	n/a	/n/a	-
1:169767998|169777070	1	169767998	169777070	3	0_1_2	4	0.6	n/a	/n/a	+
1:169947226|170001116	1	169947226	170001116	55	15_12_15	18	0.859	n/a	/n/a	-
1:169985603|169993737	1	169985603	169993737	6	4_4_0	75	0.138	n/a	/n/a	-
1:170001027|170024577	1	170001027	170024577	3	0_1_2	14	0.3	n/a	/n/a	-
1:171491316|171492661	1	171491316	171492661	12	3_2_2	142	0.145	n/a	/n/a	+
1:171492360|171494104	1	171492360	171494104	5	2_2_0	110	0.083	n/a	/n/a	+
1:171492360|171496983	1	171492360	171496983	33	12_3_7	77	0.462	n/a	/n/a	+
1:171546426|171546776	1	171546426	171546776	3	0_1_2	11	0.353	n/a	/n/a	+
1:171553095|171553665	1	171553095	171553665	4	3_3_0	25	0.242	n/a	/n/a	+
1:171752880|171753639	1	171752880	171753639	6	3_2_0	79	0.132	n/a	/n/a	+
1:172520652|172526934	1	172520652	172526934	198	35_46_16	35	0.919	n/a	/n/a	+
1:172520652|172548407	1	172520652	172548407	3	1_0_3	10	0.375	n/a	/n/a	+
1:172525009|172526934	1	172525009	172526934	47	13_12_3	139	0.403	n/a	/n/a	+
1:172525009|172539870	1	172525009	172539870	11	4_1_4	119	0.156	n/a	/n/a	+
1:172525009|172548407	1	172525009	172548407	9	3_1_2	117	0.133	n/a	/n/a	+
1:172538159|172548407	1	172538159	172548407	2	1_0_2	20	0.167	n/a	/n/a	+
1:172544658|172560211	1	172544658	172560211	3	1_0_2	13	0.316	n/a	/n/a	+
1:172569204|172571927	1	172569204	172571927	33	9_7_13	6	0.917	n/a	/n/a	+
1:173387589|173431593	1	173387589	173431593	2	2_1_0	18	0.182	n/a	/n/a	-
1:173409602|173411153	1	173409602	173411153	3	1_1_1	19	0.24	n/a	/n/a	-
1:173409602|173411187	1	173409602	173411187	9	5_2_1	14	0.562	n/a	/n/a	-
1:173409602|173411236	1	173409602	173411236	10	7_5_0	6	0.769	n/a	/n/a	-
1:173702852|173703425	1	173702852	173703425	14	5_8_0	28	0.5	n/a	/n/a	+
1:173720903|173726298	1	173720903	173726298	4	2_2_0	21	0.276	n/a	/n/a	+
1:173725062|173726298	1	173725062	173726298	15	7_7_0	34	0.469	n/a	/n/a	+
1:173743444|173744981	1	173743444	173744981	8	2_1_1	14	0.533	n/a	/n/a	+
1:173744773|173751368	1	173744773	173751368	5	2_0_2	14	0.417	n/a	/n/a	+
1:173763913|173768432	1	173763913	173768432	6	1_1_1	4	0.75	n/a	/n/a	-
1:173772101|173772643	1	173772101	173772643	11	3_1_1	28	0.44	n/a	/n/a	-
1:173807328|173810111	1	173807328	173810111	9	2_1_4	38	0.321	n/a	/n/a	+
1:173834995|173835344	1	173834995	173835344	5	1_2_0	4	0.714	n/a	/n/a	-
1:173835666|173835934	1	173835666	173835934	15	8_5_0	16	0.652	n/a	/n/a	-
1:173933977|173934258	1	173933977	173934258	5	3_2_0	15	0.4	n/a	/n/a	-
1:173961893|173962273	1	173961893	173962273	30	10_12_4	7	0.896	n/a	/n/a	-
1:174188263|174200493	1	174188263	174200493	3	1_2_0	2	0.75	n/a	/n/a	+
1:174241552|174247917	1	174241552	174247917	2	2_2_0	6	0.4	n/a	/n/a	+
1:174340117|174363283	1	174340117	174363283	12	3_4_1	5	0.828	n/a	/n/a	+
1:174606513|174781098	1	174606513	174781098	5	2_2_0	0	1	n/a	/n/a	+
1:175956079|175958615	1	175956079	175958615	23	9_7_0	43	0.517	n/a	/n/a	-
1:175996708|176015460	1	175996708	176015460	49	9_15_7	40	0.71	n/a	/n/a	-
1:176012322|176015460	1	176012322	176015460	8	1_2_5	39	0.291	n/a	/n/a	-
1:176050288|176055026	1	176050288	176055026	14	5_3_3	81	0.257	n/a	/n/a	-
1:176050288|176085817	1	176050288	176085817	29	12_5_6	48	0.547	n/a	/n/a	-
1:176050288|176104222	1	176050288	176104222	13	5_3_2	63	0.292	n/a	/n/a	-
1:176050288|176105683	1	176050288	176105683	42	16_6_5	40	0.677	n/a	/n/a	-
1:176050288|176113236	1	176050288	176113236	3	1_1_1	48	0.111	n/a	/n/a	-
1:176050288|176118210	1	176050288	176118210	17	6_1_6	69	0.33	n/a	/n/a	-
1:176050288|176145143	1	176050288	176145143	7	2_1_0	128	0.099	n/a	/n/a	-
1:176085760|176105683	1	176085760	176105683	9	1_3_3	35	0.34	n/a	/n/a	-
1:176105624|176145143	1	176105624	176145143	8	1_1_2	90	0.151	n/a	/n/a	-
1:176118142|176133027	1	176118142	176133027	12	4_2_4	97	0.198	n/a	/n/a	-
1:176118142|176145143	1	176118142	176145143	21	5_8_1	123	0.255	n/a	/n/a	-
1:176118142|176153828	1	176118142	176153828	29	4_5_11	63	0.479	n/a	/n/a	-
1:176132005|176133027	1	176132005	176133027	24	10_6_6	122	0.282	n/a	/n/a	-
1:176132005|176145143	1	176132005	176145143	50	8_6_8	149	0.402	n/a	/n/a	-
1:176132005|176153828	1	176132005	176153828	125	27_10_30	92	0.731	n/a	/n/a	-
1:178252699|178269253	1	178252699	178269253	9	4_4_1	12	0.6	n/a	/n/a	+
1:178356221|178359341	1	178356221	178359341	2	0_2_2	1	0.8	n/a	/n/a	+
1:178420706|178421787	1	178420706	178421787	2	2_2_0	12	0.25	n/a	/n/a	+
1:178708535|178777263	1	178708535	178777263	3	2_0_2	15	0.286	n/a	/n/a	+
1:178745817|178754742	1	178745817	178754742	28	11_5_8	7	0.889	n/a	/n/a	+
1:178745817|178780539	1	178745817	178780539	4	2_2_1	22	0.267	n/a	/n/a	+
1:178777180|178802685	1	178777180	178802685	9	2_5_2	5	0.783	n/a	/n/a	+
1:178780450|178802685	1	178780450	178802685	10	2_4_2	20	0.5	n/a	/n/a	+
1:178846633|178863159	1	178846633	178863159	4	2_2_0	7	0.533	n/a	/n/a	+
1:178858777|178866891	1	178858777	178866891	4	0_1_2	9	0.471	n/a	/n/a	+
1:179012850|179023773	1	179012850	179023773	37	8_5_5	30	0.712	n/a	/n/a	+
1:179019414|179023773	1	179019414	179023773	3	2_1_1	66	0.083	n/a	/n/a	+
1:179033062|179033631	1	179033062	179033631	26	9_7_1	42	0.553	n/a	/n/a	+
1:179033062|179035994	1	179033062	179035994	11	3_4_1	31	0.415	n/a	/n/a	+
1:179054763|179055028	1	179054763	179055028	6	2_2_0	214	0.053	n/a	/n/a	+
1:179054763|179057224	1	179054763	179057224	19	7_9_0	243	0.135	n/a	/n/a	+
1:179081444|179086651	1	179081444	179086651	3	1_1_2	41	0.128	n/a	/n/a	-
1:179086467|179087899	1	179086467	179087899	3	2_2_0	37	0.14	n/a	/n/a	-
1:179086467|179089409	1	179086467	179089409	2	2_0_1	30	0.118	n/a	/n/a	-
1:179087722|179089409	1	179087722	179089409	3	1_0_2	39	0.133	n/a	/n/a	-
1:179087722|179091002	1	179087722	179091002	11	4_4_0	32	0.407	n/a	/n/a	-
1:179089325|179091002	1	179089325	179091002	16	3_8_4	33	0.492	n/a	/n/a	-
1:179095512|179102509	1	179095512	179102509	3	3_1_2	49	0.109	n/a	/n/a	-
1:179100446|179100616	1	179100446	179100616	4	2_1_0	79	0.092	n/a	/n/a	-
1:179100446|179102509	1	179100446	179102509	178	39_14_29	59	0.858	n/a	/n/a	-
1:179271812|179276351	1	179271812	179276351	13	5_5_2	14	0.65	n/a	/n/a	+
1:179306972|179310445	1	179306972	179310445	13	1_6_5	43	0.377	n/a	/n/a	+
1:179316735|179319566	1	179316735	179319566	16	4_5_4	21	0.604	n/a	/n/a	+
1:179858445|179883189	1	179858445	179883189	4	3_0_3	25	0.242	n/a	/n/a	+
1:179869261|179877808	1	179869261	179877808	12	0_2_7	25	0.49	n/a	/n/a	+
1:179955304|179961356	1	179955304	179961356	23	9_12_2	18	0.719	n/a	/n/a	+
1:179959642|179961356	1	179959642	179961356	17	6_7_2	22	0.607	n/a	/n/a	+
1:179972309|179975702	1	179972309	179975702	20	4_6_8	13	0.755	n/a	/n/a	+
1:180002997|180006224	1	180002997	180006224	2	2_2_0	8	0.333	n/a	/n/a	+
1:180044157|180053313	1	180044157	180053313	4	2_3_1	0	1	n/a	/n/a	+
1:180047598|180049796	1	180047598	180049796	24	10_11_0	6	0.889	n/a	/n/a	+
1:180250441|180257652	1	180250441	180257652	2	2_0_1	11	0.267	n/a	/n/a	-
1:180366651|180370915	1	180366651	180370915	2	1_2_0	69	0.055	n/a	/n/a	-
1:180366651|180382606	1	180366651	180382606	129	15_20_35	49	0.84	n/a	/n/a	-
1:180461404|180464660	1	180461404	180464660	2	1_1_1	17	0.19	n/a	/n/a	-
1:180609839|180610653	1	180609839	180610653	2	1_0_2	2	0.667	n/a	/n/a	+
1:180793889|180794480	1	180793889	180794480	31	11_12_1	28	0.689	n/a	/n/a	+
1:180804010|180843078	1	180804010	180843078	3	1_2_0	25	0.194	n/a	/n/a	+
1:180953813|180962561	1	180953813	180962561	54	11_7_19	79	0.578	n/a	/n/a	-
1:180953813|180974599	1	180953813	180974599	7	2_2_0	48	0.226	n/a	/n/a	-
1:180971742|180974599	1	180971742	180974599	48	16_17_3	43	0.691	n/a	/n/a	-
1:182811680|182812569	1	182811680	182812569	6	3_3_0	60	0.167	n/a	/n/a	+
1:182812429|182821479	1	182812429	182821479	4	1_1_1	65	0.11	n/a	/n/a	+
1:183083626|183084772	1	183083626	183084772	5	4_2_0	63	0.137	n/a	/n/a	+
1:183083666|183084772	1	183083666	183084772	9	6_6_1	139	0.115	n/a	/n/a	+
1:183481972|183486955	1	183481972	183486955	10	0_1_3	19	0.513	n/a	/n/a	+
1:183656367|183666647	1	183656367	183666647	5	1_1_2	0	1	n/a	/n/a	+
1:184023488|184023997	1	184023488	184023997	3	2_1_3	21	0.222	n/a	/n/a	+
1:184701971|184718726	1	184701971	184718726	6	1_0_2	12	0.5	n/a	/n/a	-
1:184853767|184859356	1	184853767	184859356	4	3_3_0	229	0.034	n/a	/n/a	-
1:185056684|185060871	1	185056684	185060871	14	3_5_3	9	0.757	n/a	/n/a	+
1:185056684|185062408	1	185056684	185062408	7	1_4_2	7	0.667	n/a	/n/a	+
1:185173937|185191038	1	185173937	185191038	3	1_0_2	20	0.231	n/a	/n/a	+
1:185183639|185200840	1	185183639	185200840	19	6_3_1	1	0.974	n/a	/n/a	+
1:185277932|185280454	1	185277932	185280454	6	1_2_1	26	0.316	n/a	/n/a	-
1:185335549|185343688	1	185335549	185343688	13	2_4_2	3	0.897	n/a	/n/a	+
1:185339800|185343688	1	185339800	185343688	10	1_3_4	14	0.588	n/a	/n/a	+
1:185542129|185650021	1	185542129	185650021	4	1_1_1	3	0.727	n/a	/n/a	+
1:185647331|185650021	1	185647331	185650021	4	1_2_1	3	0.727	n/a	/n/a	+
1:186359843|186360923	1	186359843	186360923	3	1_1_1	7	0.462	n/a	/n/a	+
1:186375215|186381025	1	186375215	186381025	10	2_2_0	9	0.69	n/a	/n/a	+
1:186375215|186388209	1	186375215	186388209	7	3_2_2	8	0.636	n/a	/n/a	+
1:186862143|186880521	1	186862143	186880521	5	2_2_0	0	1	n/a	/n/a	+
1:192904959|192926552	1	192904959	192926552	5	0_1_2	8	0.556	n/a	/n/a	-
1:192997215|192998787	1	192997215	192998787	11	0_7_6	10	0.688	n/a	/n/a	-
1:193044950|193046180	1	193044950	193046180	8	2_2_0	17	0.485	n/a	/n/a	+
1:193065778|193070334	1	193065778	193070334	6	3_2_1	6	0.667	n/a	/n/a	-
1:193099304|193121574	1	193099304	193121574	7	1_1_2	16	0.467	n/a	/n/a	+
1:193104521|193107303	1	193104521	193107303	4	0_1_2	11	0.421	n/a	/n/a	+
1:193116997|193121574	1	193116997	193121574	5	1_3_2	10	0.5	n/a	/n/a	+
1:193172925|193181607	1	193172925	193181607	7	0_1_4	12	0.538	n/a	/n/a	+
1:193172925|193219001	1	193172925	193219001	8	0_3_4	8	0.667	n/a	/n/a	+
1:193202123|193205486	1	193202123	193205486	72	21_17_14	30	0.828	n/a	/n/a	+
1:193202123|193206984	1	193202123	193206984	2	2_2_0	20	0.167	n/a	/n/a	+
1:193218860|193229978	1	193218860	193229978	2	1_0_2	8	0.333	n/a	/n/a	+
1:193318263|193324971	1	193318263	193324971	11	4_2_3	0	1	n/a	/n/a	+
1:193318263|193324988	1	193318263	193324988	4	2_2_0	0	1	n/a	/n/a	+
1:193318263|193324991	1	193318263	193324991	3	2_0_1	0	1	n/a	/n/a	+
1:197086919|197091173	1	197086919	197091173	4	3_3_0	24	0.25	n/a	/n/a	-
1:197086919|197094085	1	197086919	197094085	6	2_1_1	7	0.632	n/a	/n/a	-
1:197086919|197115724	1	197086919	197115724	8	3_2_0	128	0.111	n/a	/n/a	-
1:197141290|197147642	1	197141290	197147642	5	0_4_4	21	0.323	n/a	/n/a	-
1:197141290|197150247	1	197141290	197150247	3	1_1_1	17	0.261	n/a	/n/a	-
1:197159892|197161029	1	197159892	197161029	3	1_1_1	16	0.273	n/a	/n/a	-
1:197522152|197564463	1	197522152	197564463	2	0_2_1	70	0.054	n/a	/n/a	-
1:197552282|197576304	1	197552282	197576304	4	1_1_1	47	0.145	n/a	/n/a	-
1:197552282|197581106	1	197552282	197581106	11	2_1_5	33	0.4	n/a	/n/a	-
1:197552282|197586889	1	197552282	197586889	11	5_3_3	93	0.191	n/a	/n/a	-
1:197552282|197614873	1	197552282	197614873	33	7_7_10	341	0.162	n/a	/n/a	-
1:197552282|197621445	1	197552282	197621445	5	0_2_2	434	0.023	n/a	/n/a	-
1:197552282|197684204	1	197552282	197684204	11	1_2_4	85	0.206	n/a	/n/a	-
1:197564338|197586889	1	197564338	197586889	16	4_2_4	147	0.179	n/a	/n/a	-
1:197564338|197627499	1	197564338	197627499	8	4_1_4	273	0.055	n/a	/n/a	-
1:197564338|197684204	1	197564338	197684204	11	4_2_4	139	0.137	n/a	/n/a	-
1:197576203|197627499	1	197576203	197627499	4	2_0_3	282	0.028	n/a	/n/a	-
1:197576203|197684204	1	197576203	197684204	2	2_0_2	149	0.026	n/a	/n/a	-
1:197586789|197621445	1	197586789	197621445	4	1_1_2	452	0.017	n/a	/n/a	-
1:197586789|197627499	1	197586789	197627499	2	0_2_2	241	0.016	n/a	/n/a	-
1:197586789|197643299	1	197586789	197643299	2	2_0_2	145	0.027	n/a	/n/a	-
1:197611841|197627499	1	197611841	197627499	93	21_15_22	291	0.39	n/a	/n/a	-
1:197611841|197641286	1	197611841	197641286	4	1_1_1	272	0.029	n/a	/n/a	-
1:197611841|197643299	1	197611841	197643299	17	6_1_6	197	0.147	n/a	/n/a	-
1:197611841|197684204	1	197611841	197684204	33	7_2_14	159	0.293	n/a	/n/a	-
1:197611841|197742062	1	197611841	197742062	13	4_1_5	101	0.205	n/a	/n/a	-
1:197621365|197643299	1	197621365	197643299	70	13_3_26	445	0.239	n/a	/n/a	-
1:197621365|197684204	1	197621365	197684204	71	10_6_29	406	0.259	n/a	/n/a	-
1:197621365|197742062	1	197621365	197742062	11	0_2_4	358	0.058	n/a	/n/a	-
1:197641167|197643299	1	197641167	197643299	22	9_2_8	345	0.113	n/a	/n/a	-
1:197641167|197684204	1	197641167	197684204	11	4_1_6	325	0.063	n/a	/n/a	-
1:197641167|197704926	1	197641167	197704926	5	2_2_1	290	0.033	n/a	/n/a	-
1:198201683|198222310	1	198201683	198222310	10	4_5_1	69	0.225	n/a	/n/a	+
1:198201683|198233365	1	198201683	198233365	50	12_15_13	64	0.61	n/a	/n/a	+
1:198201683|198248191	1	198201683	198248191	6	2_3_0	50	0.194	n/a	/n/a	+
1:198201683|198266370	1	198201683	198266370	4	2_2_0	33	0.195	n/a	/n/a	+
1:198222170|198233365	1	198222170	198233365	74	17_12_11	88	0.627	n/a	/n/a	+
1:198222170|198248191	1	198222170	198248191	3	3_3_0	74	0.075	n/a	/n/a	+
1:198231705|198248191	1	198231705	198248191	5	1_3_2	78	0.114	n/a	/n/a	+
1:198231705|198266370	1	198231705	198266370	16	2_7_5	61	0.344	n/a	/n/a	+
1:198247091|198266370	1	198247091	198266370	22	5_6_5	48	0.478	n/a	/n/a	+
1:198867690|198906445	1	198867690	198906445	3	0_1_2	2	0.75	n/a	/n/a	-
1:200523596|200528580	1	200523596	200528580	3	1_2_0	1	0.857	n/a	/n/a	-
1:200539039|200544819	1	200539039	200544819	4	2_1_1	5	0.615	n/a	/n/a	-
1:200539039|200555355	1	200539039	200555355	3	1_2_2	4	0.6	n/a	/n/a	-
1:200577958|200584737	1	200577958	200584737	8	1_2_3	46	0.258	n/a	/n/a	-
1:200583446|200584737	1	200583446	200584737	15	6_6_1	44	0.405	n/a	/n/a	-
1:200635065|200635879	1	200635065	200635879	12	3_2_0	16	0.6	n/a	/n/a	-
1:200709042|200730226	1	200709042	200730226	7	0_5_3	136	0.093	n/a	/n/a	+
1:200729967|200730226	1	200729967	200730226	103	21_29_4	144	0.589	n/a	/n/a	+
1:200729967|200733603	1	200729967	200733603	12	5_5_1	21	0.533	n/a	/n/a	+
1:200729967|200776665	1	200729967	200776665	3	2_1_0	201	0.029	n/a	/n/a	+
1:200729967|200784772	1	200729967	200784772	166	37_15_29	68	0.83	n/a	/n/a	+
1:200729967|200801973	1	200729967	200801973	14	5_6_0	49	0.364	n/a	/n/a	+
1:200776504|200784772	1	200776504	200784772	16	9_4_5	160	0.167	n/a	/n/a	+
1:200776504|200801973	1	200776504	200801973	26	10_8_0	142	0.268	n/a	/n/a	+
1:201457983|201459472	1	201457983	201459472	5	1_1_1	673	0.015	n/a	/n/a	-
1:201816407|201817722	1	201816407	201817722	50	4_17_17	46	0.685	n/a	/n/a	+
1:201826224|201828122	1	201826224	201828122	16	2_5_2	43	0.427	n/a	/n/a	+
1:201966447|201966682	1	201966447	201966682	7	1_2_1	95	0.128	n/a	/n/a	+
1:201966447|201969143	1	201966447	201969143	10	2_4_1	64	0.238	n/a	/n/a	+
1:201969030|201970895	1	201969030	201970895	2	1_2_1	188	0.021	n/a	/n/a	+
1:202385915|202398057	1	202385915	202398057	28	11_7_6	9	0.862	n/a	/n/a	+
1:202462242|202465950	1	202462242	202465950	5	4_2_1	0	1	n/a	/n/a	+
1:202724399|202727638	1	202724399	202727638	6	3_3_0	16	0.429	n/a	/n/a	-
1:202724399|202733273	1	202724399	202733273	5	3_2_1	6	0.625	n/a	/n/a	-
1:202742246|202746222	1	202742246	202746222	20	7_4_5	16	0.714	n/a	/n/a	-
1:202917432|202923435	1	202917432	202923435	2	2_2_0	37	0.098	n/a	/n/a	-
1:202920058|202923435	1	202920058	202923435	9	5_3_2	288	0.059	n/a	/n/a	-
1:203676137|203677232	1	203676137	203677232	14	5_5_1	24	0.538	n/a	/n/a	+
1:203689677|203691817	1	203689677	203691817	2	2_2_0	30	0.118	n/a	/n/a	+
1:204082043|204083733	1	204082043	204083733	7	4_2_1	21	0.4	n/a	/n/a	+
1:204367783|204369917	1	204367783	204369917	5	1_3_1	6	0.625	n/a	/n/a	-
1:204437998|204439014	1	204437998	204439014	6	2_1_0	39	0.235	n/a	/n/a	-
1:204494612|204501374	1	204494612	204501374	2	2_1_1	14	0.222	n/a	/n/a	+
1:205156546|205156902	1	205156546	205156902	4	1_2_0	26	0.235	n/a	/n/a	-
1:205156546|205156934	1	205156546	205156934	6	4_4_1	27	0.308	n/a	/n/a	-
1:205577523|205578329	1	205577523	205578329	2	2_1_0	4	0.5	n/a	/n/a	+
1:205585606|205593019	1	205585606	205593019	5	0_3_1	11	0.476	n/a	/n/a	-
1:205680872|205681106	1	205680872	205681106	8	2_4_0	6	0.727	n/a	/n/a	-
1:205680872|205682568	1	205680872	205682568	9	3_0_3	7	0.72	n/a	/n/a	-
1:206769067|206785710	1	206769067	206785710	10	3_2_2	14	0.588	n/a	/n/a	-
1:207930359|207933069	1	207930359	207933069	13	5_2_2	35	0.426	n/a	/n/a	+
1:207989274|207990759	1	207989274	207990759	102	38_36_3	30	0.872	n/a	/n/a	-
1:211092982|211093411	1	211092982	211093411	22	6_8_1	2	0.957	n/a	/n/a	-
1:211433450|211477482	1	211433450	211477482	2	0_1_2	26	0.133	n/a	/n/a	+
1:211444574|211451583	1	211444574	211451583	3	1_2_1	15	0.286	n/a	/n/a	+
1:211462520|211469095	1	211462520	211469095	7	2_1_1	26	0.35	n/a	/n/a	+
1:211526581|211527809	1	211526581	211527809	4	1_1_1	0	1	n/a	/n/a	+
1:211564958|211565318	1	211564958	211565318	6	1_3_2	16	0.429	n/a	/n/a	+
1:211952260|211956844	1	211952260	211956844	5	3_3_0	28	0.263	n/a	/n/a	-
1:211952260|211961069	1	211952260	211961069	8	4_1_3	23	0.41	n/a	/n/a	-
1:211952260|211966532	1	211952260	211966532	26	3_3_4	19	0.732	n/a	/n/a	-
1:211960974|211966532	1	211960974	211966532	9	2_6_5	21	0.462	n/a	/n/a	-
1:212125005|212126043	1	212125005	212126043	7	5_5_0	19	0.424	n/a	/n/a	-
1:212179981|212184763	1	212179981	212184763	32	12_3_11	77	0.454	n/a	/n/a	-
1:212179981|212190365	1	212179981	212190365	7	3_4_1	38	0.269	n/a	/n/a	-
1:212179981|212194554	1	212179981	212194554	24	6_7_5	23	0.676	n/a	/n/a	-
1:212179981|212208745	1	212179981	212208745	5	1_0_4	30	0.25	n/a	/n/a	-
1:212190228|212194554	1	212190228	212194554	2	2_1_1	83	0.046	n/a	/n/a	-
1:212193464|212194554	1	212193464	212194554	11	3_4_1	34	0.393	n/a	/n/a	-
1:212216335|212220759	1	212216335	212220759	13	3_3_1	21	0.553	n/a	/n/a	+
1:212218002|212220759	1	212218002	212220759	69	20_23_12	42	0.767	n/a	/n/a	+
1:212241566|212254092	1	212241566	212254092	14	3_3_3	49	0.364	n/a	/n/a	+
1:212241941|212254092	1	212241941	212254092	10	1_2_2	75	0.211	n/a	/n/a	+
1:212273594|212276294	1	212273594	212276294	7	3_4_1	37	0.275	n/a	/n/a	+
1:212480125|212506940	1	212480125	212506940	4	1_1_2	118	0.063	n/a	/n/a	+
1:212499325|212506940	1	212499325	212506940	5	1_3_1	120	0.077	n/a	/n/a	+
1:212502477|212506940	1	212502477	212506940	162	16_11_23	122	0.726	n/a	/n/a	+
1:212502477|212515622	1	212502477	212515622	5	3_2_1	53	0.159	n/a	/n/a	+
1:212502477|212519275	1	212502477	212519275	4	3_1_0	29	0.216	n/a	/n/a	+
1:212502564|212522584	1	212502564	212522584	5	2_0_2	76	0.116	n/a	/n/a	+
1:212506839|212522584	1	212506839	212522584	3	1_0_2	131	0.044	n/a	/n/a	+
1:212515530|212522584	1	212515530	212522584	4	2_0_2	108	0.069	n/a	/n/a	+
1:212515530|212530626	1	212515530	212530626	4	1_1_1	101	0.073	n/a	/n/a	+
1:212548535|212560442	1	212548535	212560442	3	2_2_0	19	0.24	n/a	/n/a	-
1:212939531|212957835	1	212939531	212957835	5	1_2_1	31	0.244	n/a	/n/a	-
1:212957705|212960979	1	212957705	212960979	14	5_4_2	46	0.378	n/a	/n/a	-
1:213037067|213046160	1	213037067	213046160	56	16_16_3	58	0.659	n/a	/n/a	+
1:213037067|213058738	1	213037067	213058738	31	11_8_3	25	0.713	n/a	/n/a	+
1:213037067|213061936	1	213037067	213061936	3	2_2_0	36	0.143	n/a	/n/a	+
1:213037067|213062599	1	213037067	213062599	8	5_4_0	28	0.364	n/a	/n/a	+
1:213037067|213068696	1	213037067	213068696	7	3_1_0	11	0.56	n/a	/n/a	+
1:213043396|213046160	1	213043396	213046160	6	1_2_3	75	0.138	n/a	/n/a	+
1:213046020|213062599	1	213046020	213062599	8	3_3_2	129	0.11	n/a	/n/a	+
1:213056713|213062599	1	213056713	213062599	9	0_1_2	63	0.222	n/a	/n/a	+
1:213068328|213068696	1	213068328	213068696	3	0_2_1	21	0.222	n/a	/n/a	+
1:213178375|213180540	1	213178375	213180540	3	1_1_1	18	0.25	n/a	/n/a	-
1:213244348|213251158	1	213244348	213251158	2	0_1_2	99	0.039	n/a	/n/a	+
1:213244348|213277911	1	213244348	213277911	4	0_1_2	106	0.07	n/a	/n/a	+
1:213244348|213290752	1	213244348	213290752	30	1_8_11	41	0.594	n/a	/n/a	+
1:213251038|213277911	1	213251038	213277911	6	2_2_0	145	0.076	n/a	/n/a	+
1:213251038|213290752	1	213251038	213290752	145	32_18_22	86	0.771	n/a	/n/a	+
1:213251038|213303232	1	213251038	213303232	3	2_2_0	83	0.067	n/a	/n/a	+
1:213251038|213316144	1	213251038	213316144	5	2_1_0	54	0.156	n/a	/n/a	+
1:213277796|213290752	1	213277796	213290752	9	2_1_1	138	0.115	n/a	/n/a	+
1:213290659|213303232	1	213290659	213303232	18	4_6_5	115	0.238	n/a	/n/a	+
1:213302870|213303232	1	213302870	213303232	5	3_3_0	88	0.102	n/a	/n/a	+
1:213302870|213349835	1	213302870	213349835	10	4_1_1	102	0.164	n/a	/n/a	+
1:213341201|213349835	1	213341201	213349835	75	13_9_19	73	0.673	n/a	/n/a	+
1:213341201|213405598	1	213341201	213405598	3	1_1_1	41	0.128	n/a	/n/a	+
1:213415912|213436159	1	213415912	213436159	16	4_4_1	51	0.386	n/a	/n/a	+
1:214488105|214492326	1	214488105	214492326	6	1_1_2	58	0.171	n/a	/n/a	+
1:214564331|214571344	1	214564331	214571344	27	4_4_14	27	0.667	n/a	/n/a	-
1:214575028|214638300	1	214575028	214638300	2	2_2_0	43	0.085	n/a	/n/a	-
1:214625148|214638300	1	214625148	214638300	16	6_6_0	45	0.416	n/a	/n/a	-
1:214637973|214638300	1	214637973	214638300	49	18_22_1	52	0.653	n/a	/n/a	-
1:214987756|214991664	1	214987756	214991664	3	2_2_0	0	1	n/a	/n/a	+
1:215259711|215260021	1	215259711	215260021	7	2_3_0	8	0.636	n/a	/n/a	+
1:215342542|215345526	1	215342542	215345526	38	7_11_1	11	0.874	n/a	/n/a	+
1:215408171|215408522	1	215408171	215408522	5	1_2_0	2	0.833	n/a	/n/a	+
1:215749244|215752480	1	215749244	215752480	5	1_3_2	39	0.204	n/a	/n/a	+
1:215759838|215768813	1	215759838	215768813	3	2_3_1	34	0.15	n/a	/n/a	+
1:215759838|215785263	1	215759838	215785263	5	2_1_1	42	0.192	n/a	/n/a	+
1:215768698|215777644	1	215768698	215777644	3	2_3_0	44	0.12	n/a	/n/a	+
1:217688164|217787544	1	217688164	217787544	2	1_1_2	18	0.182	n/a	/n/a	-
1:217783663|217787544	1	217783663	217787544	31	4_5_13	18	0.775	n/a	/n/a	-
1:217822224|217829854	1	217822224	217829854	2	2_1_0	0	1	n/a	/n/a	+
1:219366424|219385094	1	219366424	219385094	45	16_18_6	124	0.421	n/a	/n/a	+
1:219366424|219392054	1	219366424	219392054	70	18_21_0	32	0.814	n/a	/n/a	+
1:219366424|219414650	1	219366424	219414650	14	5_4_0	21	0.571	n/a	/n/a	+
1:219366472|219385094	1	219366472	219385094	2	2_2_0	162	0.024	n/a	/n/a	+
1:219366472|219392054	1	219366472	219392054	6	1_2_0	71	0.145	n/a	/n/a	+
1:220179448|220180680	1	220179448	220180680	34	10_11_4	95	0.417	n/a	/n/a	-
1:220310151|220312481	1	220310151	220312481	5	2_3_1	52	0.161	n/a	/n/a	+
1:220344234|220346084	1	220344234	220346084	6	2_2_1	20	0.375	n/a	/n/a	-
1:220355599|220356273	1	220355599	220356273	15	5_6_2	14	0.682	n/a	/n/a	-
1:220368640|220383831	1	220368640	220383831	5	1_2_1	27	0.27	n/a	/n/a	-
1:220386229|220387321	1	220386229	220387321	30	10_12_7	12	0.833	n/a	/n/a	-
1:220724448|220754460	1	220724448	220754460	5	2_1_1	2	0.833	n/a	/n/a	+
1:220752696|220754460	1	220752696	220754460	14	5_2_4	11	0.718	n/a	/n/a	+
1:220771673|220792097	1	220771673	220792097	13	0_4_5	7	0.788	n/a	/n/a	+
1:220825328|220826694	1	220825328	220826694	3	1_3_0	14	0.3	n/a	/n/a	+
1:220935000|220936392	1	220935000	220936392	3	2_1_0	31	0.162	n/a	/n/a	+
1:220935000|220943898	1	220935000	220943898	3	1_2_0	22	0.214	n/a	/n/a	+
1:222897434|222898897	1	222897434	222898897	29	5_7_7	9	0.866	n/a	/n/a	+
1:222897442|222898897	1	222897442	222898897	3	0_1_2	14	0.3	n/a	/n/a	+
1:222997226|223008557	1	222997226	223008557	8	1_0_2	22	0.421	n/a	/n/a	+
1:223073123|223101912	1	223073123	223101912	2	2_2_0	2	0.667	n/a	/n/a	+
1:223931802|223933141	1	223931802	223933141	6	1_2_0	804	0.015	n/a	/n/a	+
1:223934699|223936824	1	223934699	223936824	6	1_0_3	93	0.114	n/a	/n/a	+
1:223946972|223949953	1	223946972	223949953	4	3_1_0	160	0.048	n/a	/n/a	+
1:223946972|223959941	1	223946972	223959941	14	3_0_6	118	0.192	n/a	/n/a	+
1:223962865|223963482	1	223962865	223963482	2	1_0_2	72	0.053	n/a	/n/a	+
1:223991876|223994649	1	223991876	223994649	7	4_3_1	26	0.35	n/a	/n/a	-
1:224001942|224009069	1	224001942	224009069	4	1_2_0	171	0.045	n/a	/n/a	-
1:224142179|224149975	1	224142179	224149975	35	7_12_0	19	0.787	n/a	/n/a	-
1:224142179|224150410	1	224142179	224150410	4	3_2_1	13	0.381	n/a	/n/a	-
1:224377279|224378021	1	224377279	224378021	5	2_2_0	35	0.222	n/a	/n/a	+
1:224418928|224455835	1	224418928	224455835	4	2_2_1	60	0.118	n/a	/n/a	-
1:224424208|224438020	1	224424208	224438020	7	0_2_3	124	0.101	n/a	/n/a	-
1:224424208|224455835	1	224424208	224455835	12	1_1_3	55	0.304	n/a	/n/a	-
1:224437914|224455835	1	224437914	224455835	28	9_9_7	88	0.389	n/a	/n/a	-
1:224454706|224455835	1	224454706	224455835	31	12_9_7	85	0.422	n/a	/n/a	-
1:224553581|224559125	1	224553581	224559125	52	16_21_4	115	0.475	n/a	/n/a	+
1:224553581|224567357	1	224553581	224567357	17	4_6_4	52	0.395	n/a	/n/a	+
1:224599129|224604271	1	224599129	224604271	6	2_2_0	30	0.286	n/a	/n/a	-
1:225140372|225156576	1	225140372	225156576	25	10_12_3	42	0.543	n/a	/n/a	+
1:225140372|225161855	1	225140372	225161855	11	5_1_5	14	0.611	n/a	/n/a	+
1:225140372|225195246	1	225140372	225195246	48	12_13_3	56	0.632	n/a	/n/a	+
1:225140387|225156576	1	225140387	225156576	2	1_2_1	48	0.077	n/a	/n/a	+
1:225161793|225211567	1	225161793	225211567	11	2_4_2	76	0.224	n/a	/n/a	+
1:225161793|225226525	1	225161793	225226525	4	2_2_0	34	0.19	n/a	/n/a	+
1:225161793|225284941	1	225161793	225284941	7	1_3_3	53	0.209	n/a	/n/a	+
1:225190485|225195246	1	225190485	225195246	3	1_2_0	64	0.086	n/a	/n/a	+
1:225190485|225211567	1	225190485	225211567	3	3_3_0	67	0.082	n/a	/n/a	+
1:225195115|225211567	1	225195115	225211567	15	6_4_3	119	0.201	n/a	/n/a	+
1:225195115|225226525	1	225195115	225226525	7	3_3_0	78	0.152	n/a	/n/a	+
1:225195115|225284941	1	225195115	225284941	48	11_10_5	97	0.497	n/a	/n/a	+
1:225195115|225311316	1	225195115	225311316	9	1_1_2	72	0.2	n/a	/n/a	+
1:225211317|225211567	1	225211317	225211567	12	5_4_0	85	0.22	n/a	/n/a	+
1:225260438|225284941	1	225260438	225284941	4	3_2_1	34	0.19	n/a	/n/a	+
1:225260457|225284941	1	225260457	225284941	4	1_1_1	40	0.167	n/a	/n/a	+
1:225270251|225284941	1	225270251	225284941	10	5_6_1	49	0.29	n/a	/n/a	+
1:225270251|225332330	1	225270251	225332330	7	2_3_0	46	0.233	n/a	/n/a	+
1:225273246|225284941	1	225273246	225284941	14	5_2_1	67	0.295	n/a	/n/a	+
1:225273412|225284941	1	225273412	225284941	53	9_20_13	94	0.53	n/a	/n/a	+
1:225273412|225311316	1	225273412	225311316	3	2_2_0	75	0.074	n/a	/n/a	+
1:225284820|225311316	1	225284820	225311316	3	1_0_2	81	0.069	n/a	/n/a	+
1:225284820|225355730	1	225284820	225355730	2	0_1_2	112	0.034	n/a	/n/a	+
1:225339707|225373127	1	225339707	225373127	3	2_2_0	60	0.091	n/a	/n/a	+
1:225355641|225373127	1	225355641	225373127	6	2_3_2	52	0.188	n/a	/n/a	+
1:225372993|225394922	1	225372993	225394922	7	1_3_1	33	0.298	n/a	/n/a	+
1:225391885|225394922	1	225391885	225394922	10	3_3_1	19	0.513	n/a	/n/a	+
1:225600156|225603034	1	225600156	225603034	29	12_3_5	36	0.617	n/a	/n/a	-
1:225695653|225702602	1	225695653	225702602	2	2_2_0	14	0.222	n/a	/n/a	-
1:225718256|225754997	1	225718256	225754997	6	3_0_3	135	0.082	n/a	/n/a	-
1:225718256|225755116	1	225718256	225755116	69	11_21_10	78	0.639	n/a	/n/a	-
1:225742608|225755116	1	225742608	225755116	195	50_46_7	146	0.728	n/a	/n/a	-
1:225754951|225840135	1	225754951	225840135	7	2_2_1	106	0.117	n/a	/n/a	-
1:226016426|226017235	1	226016426	226017235	6	3_1_0	43	0.218	n/a	/n/a	+
1:226016426|226019660	1	226016426	226019660	5	3_3_0	243	0.04	n/a	/n/a	+
1:226026355|226027738	1	226026355	226027738	4	2_2_0	638	0.012	n/a	/n/a	+
1:226426672|226438620	1	226426672	226438620	7	2_0_1	4	0.778	n/a	/n/a	-
1:226483543|226485514	1	226483543	226485514	2	0_1_2	17	0.19	n/a	/n/a	-
1:227192695|227204751	1	227192695	227204751	61	22_23_6	45	0.731	n/a	/n/a	-
1:227203781|227213853	1	227203781	227213853	5	1_1_1	60	0.143	n/a	/n/a	-
1:227218109|227223308	1	227218109	227223308	7	1_3_1	10	0.583	n/a	/n/a	-
1:227227832|227235711	1	227227832	227235711	2	2_0_1	34	0.105	n/a	/n/a	-
1:227227832|227257554	1	227227832	227257554	4	1_1_2	39	0.17	n/a	/n/a	-
1:227257478|227262065	1	227257478	227262065	3	0_1_2	41	0.128	n/a	/n/a	-
1:227327277|227335260	1	227327277	227335260	41	12_17_2	25	0.766	n/a	/n/a	-
1:227333190|227335260	1	227333190	227335260	3	1_1_1	137	0.042	n/a	/n/a	-
1:227348244|227387353	1	227348244	227387353	7	1_3_3	45	0.237	n/a	/n/a	-
1:227348244|227400920	1	227348244	227400920	5	4_0_4	29	0.256	n/a	/n/a	-
1:227381487|227387353	1	227381487	227387353	51	17_13_4	55	0.65	n/a	/n/a	-
1:227381487|227400920	1	227381487	227400920	45	13_7_10	40	0.692	n/a	/n/a	-
1:227381487|227441856	1	227381487	227441856	7	2_3_0	32	0.304	n/a	/n/a	-
1:227381487|227504947	1	227381487	227504947	8	5_3_0	36	0.308	n/a	/n/a	-
1:227935393|227935934	1	227935393	227935934	22	9_9_3	36	0.55	n/a	/n/a	+
1:227946696|227947186	1	227946696	227947186	5	3_3_0	246	0.039	n/a	/n/a	+
1:228496800|228497260	1	228496800	228497260	14	5_3_6	35	0.444	n/a	/n/a	+
1:228582438|228582953	1	228582438	228582953	11	4_5_0	110	0.167	n/a	/n/a	-
1:229433267|229439747	1	229433267	229439747	3	1_1_1	26	0.188	n/a	/n/a	+
1:229580661|229596516	1	229580661	229596516	4	1_2_1	52	0.133	n/a	/n/a	-
1:229586272|229601266	1	229586272	229601266	8	3_1_2	25	0.39	n/a	/n/a	-
1:229593908|229596516	1	229593908	229596516	8	2_4_0	58	0.216	n/a	/n/a	-
1:229593908|229599423	1	229593908	229599423	5	3_3_0	54	0.156	n/a	/n/a	-
1:229593908|229601266	1	229593908	229601266	5	4_2_1	35	0.222	n/a	/n/a	-
1:229593908|229606551	1	229593908	229606551	3	2_2_0	49	0.109	n/a	/n/a	-
1:229596358|229601266	1	229596358	229601266	3	3_1_1	47	0.113	n/a	/n/a	-
1:229599290|229601266	1	229599290	229601266	6	2_0_3	45	0.211	n/a	/n/a	-
1:229602381|229623360	1	229602381	229623360	7	4_4_2	22	0.389	n/a	/n/a	-
1:229613344|229623360	1	229613344	229623360	8	3_2_1	43	0.271	n/a	/n/a	-
1:229622118|229623360	1	229622118	229623360	8	3_3_0	60	0.211	n/a	/n/a	-
1:229625702|229634053	1	229625702	229634053	12	5_6_0	32	0.429	n/a	/n/a	-
1:229675203|229678118	1	229675203	229678118	9	4_4_0	6	0.75	n/a	/n/a	-
1:229675203|229685181	1	229675203	229685181	4	2_3_0	2	0.8	n/a	/n/a	-
1:230301357|230314057	1	230301357	230314057	8	2_2_1	26	0.381	n/a	/n/a	+
1:230313964|230339036	1	230313964	230339036	10	2_6_1	40	0.333	n/a	/n/a	+
1:230371760|230372471	1	230371760	230372471	9	1_2_7	83	0.178	n/a	/n/a	+
1:230379052|230401113	1	230379052	230401113	3	1_2_0	184	0.032	n/a	/n/a	+
1:230384930|230391090	1	230384930	230391090	6	2_2_0	102	0.105	n/a	/n/a	+
1:230390964|230401113	1	230390964	230401113	5	1_3_1	187	0.051	n/a	/n/a	+
1:230398319|230401113	1	230398319	230401113	6	2_3_1	176	0.064	n/a	/n/a	+
1:230795210|230800333	1	230795210	230800333	9	5_4_0	124	0.127	n/a	/n/a	+
1:230798887|230800333	1	230798887	230800333	24	1_7_7	148	0.245	n/a	/n/a	+
1:230798887|230807386	1	230798887	230807386	34	6_15_11	99	0.407	n/a	/n/a	+
1:230798887|230810870	1	230798887	230810870	35	7_11_11	67	0.511	n/a	/n/a	+
1:230804422|230810870	1	230804422	230810870	11	2_2_0	93	0.191	n/a	/n/a	+
1:231079552|231097049	1	231079552	231097049	44	7_12_22	25	0.779	n/a	/n/a	-
1:231081135|231097049	1	231081135	231097049	56	6_12_19	44	0.718	n/a	/n/a	-
1:231090079|231097049	1	231090079	231097049	153	19_28_47	135	0.694	n/a	/n/a	-
1:231131506|231133013	1	231131506	231133013	4	2_2_0	29	0.216	n/a	/n/a	+
1:231383053|231386889	1	231383053	231386889	3	2_2_0	18	0.25	n/a	/n/a	+
1:231506308|231509845	1	231506308	231509845	57	20_18_7	21	0.844	n/a	/n/a	-
1:231672959|231678357	1	231672959	231678357	37	13_15_7	36	0.673	n/a	/n/a	+
1:231930988|231954263	1	231930988	231954263	3	0_2_1	0	1	n/a	/n/a	+
1:232561335|232568217	1	232561335	232568217	15	4_4_0	18	0.625	n/a	/n/a	-
1:232596633|232607274	1	232596633	232607274	6	3_2_1	41	0.226	n/a	/n/a	-
1:232596633|232615476	1	232596633	232615476	3	2_2_0	43	0.122	n/a	/n/a	-
1:232626620|232629406	1	232626620	232629406	13	4_3_1	1	0.963	n/a	/n/a	-
1:233091303|233092189	1	233091303	233092189	4	2_1_1	138	0.055	n/a	/n/a	+
1:233150411|233161145	1	233150411	233161145	5	2_2_0	2	0.833	n/a	/n/a	-
1:233190014|233193036	1	233190014	233193036	18	4_4_1	12	0.75	n/a	/n/a	-
1:233190014|233231609	1	233190014	233231609	2	1_1_1	15	0.211	n/a	/n/a	-
1:233225807|233231609	1	233225807	233231609	22	2_2_6	21	0.677	n/a	/n/a	-
1:233248545|233297109	1	233248545	233297109	7	3_1_2	152	0.084	n/a	/n/a	-
1:233248591|233297109	1	233248591	233297109	8	1_0_3	155	0.094	n/a	/n/a	-
1:233296029|233314921	1	233296029	233314921	8	2_2_2	248	0.061	n/a	/n/a	-
1:233296029|233344435	1	233296029	233344435	5	2_1_1	141	0.066	n/a	/n/a	-
1:233296029|233372726	1	233296029	233372726	6	2_2_0	156	0.071	n/a	/n/a	-
1:233313548|233344435	1	233313548	233344435	5	1_4_1	87	0.103	n/a	/n/a	-
1:233334685|233344435	1	233334685	233344435	12	4_4_3	66	0.267	n/a	/n/a	-
1:233334685|233353930	1	233334685	233353930	10	2_2_3	89	0.183	n/a	/n/a	-
1:233334685|233372726	1	233334685	233372726	9	3_3_2	81	0.182	n/a	/n/a	-
1:233334685|233388534	1	233334685	233388534	4	2_3_2	74	0.098	n/a	/n/a	-
1:233353645|233363117	1	233353645	233363117	56	1_16_17	59	0.655	n/a	/n/a	-
1:233353645|233372726	1	233353645	233372726	56	3_17_16	46	0.709	n/a	/n/a	-
1:233362972|233372726	1	233362972	233372726	18	6_8_0	69	0.343	n/a	/n/a	-
1:233372591|233388534	1	233372591	233388534	7	2_3_0	80	0.149	n/a	/n/a	-
1:233482188|233490757	1	233482188	233490757	68	27_23_4	12	0.919	n/a	/n/a	+
1:233802341|233802736	1	233802341	233802736	2	2_2_0	51	0.073	n/a	/n/a	+
1:233822363|233822650	1	233822363	233822650	6	3_3_0	0	1	n/a	/n/a	-
1:234041275|234041504	1	234041275	234041504	2	2_2_0	13	0.235	n/a	/n/a	+
1:234274839|234282820	1	234274839	234282820	3	1_0_3	2	0.75	n/a	/n/a	+
1:234342395|234342788	1	234342395	234342788	7	2_3_0	2	0.875	n/a	/n/a	+
1:234365425|234367487	1	234365425	234367487	4	2_2_0	5	0.615	n/a	/n/a	+
1:234553830|234556558	1	234553830	234556558	7	2_1_0	20	0.412	n/a	/n/a	-
1:234553830|234563512	1	234553830	234563512	14	5_5_0	6	0.824	n/a	/n/a	-
1:234569156|234573118	1	234569156	234573118	5	2_1_0	13	0.435	n/a	/n/a	-
1:234586174|234608557	1	234586174	234608557	20	9_7_3	16	0.714	n/a	/n/a	-
1:234593413|234603396	1	234593413	234603396	13	5_6_1	71	0.268	n/a	/n/a	-
1:234593413|234607003	1	234593413	234607003	3	1_1_3	70	0.079	n/a	/n/a	-
1:234593413|234608557	1	234593413	234608557	11	4_2_6	53	0.293	n/a	/n/a	-
1:234599583|234603396	1	234599583	234603396	8	3_3_1	44	0.267	n/a	/n/a	-
1:235277083|235285687	1	235277083	235285687	4	2_2_0	4	0.667	n/a	/n/a	-
1:235316021|235318427	1	235316021	235318427	3	0_1_2	34	0.15	n/a	/n/a	-
1:235403628|235424067	1	235403628	235424067	2	1_1_1	3	0.571	n/a	/n/a	-
1:235409735|235424067	1	235409735	235424067	18	3_5_3	8	0.818	n/a	/n/a	-
1:235416045|235424067	1	235416045	235424067	4	0_2_2	13	0.381	n/a	/n/a	-
1:235505023|235506198	1	235505023	235506198	18	3_3_6	10	0.783	n/a	/n/a	+
1:235577748|235590554	1	235577748	235590554	24	8_6_5	111	0.302	n/a	/n/a	+
1:235582732|235594119	1	235582732	235594119	6	2_2_0	64	0.158	n/a	/n/a	+
1:235582732|235597595	1	235582732	235597595	13	4_1_4	30	0.464	n/a	/n/a	+
1:235582788|235590554	1	235582788	235590554	6	0_4_4	122	0.09	n/a	/n/a	+
1:235582788|235594119	1	235582788	235594119	3	1_1_1	86	0.065	n/a	/n/a	+
1:235582788|235597595	1	235582788	235597595	31	3_8_15	52	0.544	n/a	/n/a	+
1:235590455|235597595	1	235590455	235597595	12	1_5_3	143	0.144	n/a	/n/a	+
1:235600637|235602237	1	235600637	235602237	8	4_3_3	62	0.205	n/a	/n/a	+
1:235600637|235606226	1	235600637	235606226	2	2_0_2	51	0.073	n/a	/n/a	+
1:235617468|235618996	1	235617468	235618996	3	2_2_0	17	0.261	n/a	/n/a	-
1:235621911|235634274	1	235621911	235634274	3	2_2_0	44	0.12	n/a	/n/a	-
1:235628953|235658138	1	235628953	235658138	5	0_2_1	103	0.088	n/a	/n/a	-
1:235634164|235647831	1	235634164	235647831	5	2_1_1	146	0.064	n/a	/n/a	-
1:235634164|235658138	1	235634164	235658138	12	4_4_1	124	0.162	n/a	/n/a	-
1:235643370|235658138	1	235643370	235658138	86	20_30_9	167	0.507	n/a	/n/a	-
1:235643370|235659618	1	235643370	235659618	14	3_4_3	75	0.272	n/a	/n/a	-
1:235647638|235658138	1	235647638	235658138	2	1_2_1	267	0.015	n/a	/n/a	-
1:235652473|235659618	1	235652473	235659618	4	1_2_0	134	0.056	n/a	/n/a	-
1:235657991|235659618	1	235657991	235659618	13	5_6_1	188	0.121	n/a	/n/a	-
1:235850249|235860572	1	235850249	235860572	12	3_4_1	12	0.667	n/a	/n/a	-
1:235993526|235996967	1	235993526	235996967	7	3_2_2	7	0.667	n/a	/n/a	-
1:236332006|236347206	1	236332006	236347206	42	4_17_11	29	0.743	n/a	/n/a	+
1:236341714|236347206	1	236341714	236347206	15	5_4_0	44	0.405	n/a	/n/a	+
1:236735711|236740249	1	236735711	236740249	4	1_1_2	7	0.533	n/a	/n/a	-
1:236754147|236755933	1	236754147	236755933	4	1_1_2	13	0.381	n/a	/n/a	-
1:236966728|236969533	1	236966728	236969533	10	5_3_2	47	0.299	n/a	/n/a	+
1:236969444|236979843	1	236969444	236979843	46	6_8_9	38	0.708	n/a	/n/a	+
1:236972004|236979843	1	236972004	236979843	5	0_2_3	44	0.185	n/a	/n/a	+
1:236972004|236990196	1	236972004	236990196	4	1_0_2	40	0.167	n/a	/n/a	+
1:236987419|236990196	1	236987419	236990196	3	1_1_2	22	0.214	n/a	/n/a	+
1:237013644|237016388	1	237013644	237016388	12	6_6_1	26	0.48	n/a	/n/a	+
1:237023133|237026854	1	237023133	237026854	18	4_6_5	12	0.75	n/a	/n/a	+
1:241936094|241938512	1	241936094	241938512	11	2_2_0	2	0.917	n/a	/n/a	+
1:242045218|242048809	1	242045218	242048809	3	1_2_1	3	0.667	n/a	/n/a	+
1:243362362|243375266	1	243362362	243375266	9	4_0_1	3	0.857	n/a	/n/a	-
1:243362362|243388623	1	243362362	243388623	10	2_2_0	15	0.571	n/a	/n/a	-
1:243385026|243388623	1	243385026	243388623	44	8_14_8	35	0.715	n/a	/n/a	-
1:243708812|243716245	1	243708812	243716245	3	2_1_0	17	0.261	n/a	/n/a	-
1:243708812|243736350	1	243708812	243736350	8	3_4_2	8	0.667	n/a	/n/a	-
1:243727022|243801044	1	243727022	243801044	7	1_2_0	26	0.35	n/a	/n/a	-
1:243776973|243801044	1	243776973	243801044	6	0_2_2	27	0.308	n/a	/n/a	-
1:244574589|244581054	1	244574589	244581054	4	2_1_1	25	0.242	n/a	/n/a	-
1:244620795|244643086	1	244620795	244643086	10	1_0_3	13	0.606	n/a	/n/a	+
1:244640843|244662381	1	244640843	244662381	7	2_2_5	11	0.56	n/a	/n/a	+
1:244715624|244724447	1	244715624	244724447	19	9_8_0	1	0.974	n/a	/n/a	+
1:244723970|244724447	1	244723970	244724447	3	1_2_0	5	0.545	n/a	/n/a	+
1:245006437|245012158	1	245006437	245012158	18	2_8_10	6	0.857	n/a	/n/a	-
1:245152416|245180628	1	245152416	245180628	4	1_1_1	69	0.104	n/a	/n/a	+
1:245152416|245222760	1	245152416	245222760	3	1_1_1	32	0.158	n/a	/n/a	+
1:245165423|245180628	1	245165423	245180628	35	10_7_15	81	0.464	n/a	/n/a	+
1:245165423|245185598	1	245165423	245185598	16	4_5_5	31	0.508	n/a	/n/a	+
1:245165423|245222760	1	245165423	245222760	10	4_4_2	48	0.294	n/a	/n/a	+
1:245180544|245222760	1	245180544	245222760	11	2_2_7	80	0.216	n/a	/n/a	+
1:245180544|245246990	1	245180544	245246990	14	2_2_5	65	0.301	n/a	/n/a	+
1:245222688|245246990	1	245222688	245246990	15	2_2_8	45	0.4	n/a	/n/a	+
1:246078832|246093239	1	246078832	246093239	12	3_1_6	82	0.226	n/a	/n/a	-
1:246091233|246093239	1	246091233	246093239	3	2_1_2	110	0.052	n/a	/n/a	-
1:246350045|246350244	1	246350045	246350244	4	0_2_1	15	0.348	n/a	/n/a	-
1:246350045|246358766	1	246350045	246358766	4	2_3_0	8	0.5	n/a	/n/a	-
1:246490503|246493839	1	246490503	246493839	3	1_0_2	109	0.052	n/a	/n/a	-
1:246490503|246498776	1	246490503	246498776	110	32_18_11	39	0.849	n/a	/n/a	-
1:246490503|246518396	1	246490503	246518396	17	6_1_6	47	0.42	n/a	/n/a	-
1:246518333|246603426	1	246518333	246603426	15	0_4_5	60	0.333	n/a	/n/a	-
1:246599247|246603426	1	246599247	246603426	58	8_15_13	30	0.795	n/a	/n/a	-
1:246599247|246644611	1	246599247	246644611	4	2_1_0	11	0.421	n/a	/n/a	-
1:246600450|246603426	1	246600450	246603426	123	11_28_39	41	0.857	n/a	/n/a	-
1:246600450|246604601	1	246600450	246604601	9	2_4_4	13	0.581	n/a	/n/a	-
1:246670356|246835919	1	246670356	246835919	19	11_9_0	17	0.691	n/a	/n/a	-
1:246704240|246714604	1	246704240	246714604	8	3_1_3	16	0.5	n/a	/n/a	-
1:246714515|246720836	1	246714515	246720836	6	1_2_1	6	0.667	n/a	/n/a	-
1:246719875|246720836	1	246719875	246720836	4	3_3_0	16	0.333	n/a	/n/a	-
1:246754814|246755243	1	246754814	246755243	17	7_7_1	22	0.607	n/a	/n/a	+
1:246784731|246797889	1	246784731	246797889	12	3_3_4	29	0.453	n/a	/n/a	+
1:246890194|246903603	1	246890194	246903603	72	15_19_8	27	0.842	n/a	/n/a	+
1:246890194|246907427	1	246890194	246907427	41	11_3_15	20	0.804	n/a	/n/a	+
1:246899277|246907427	1	246899277	246907427	19	5_4_9	118	0.244	n/a	/n/a	+
1:247050513|247051535	1	247050513	247051535	4	2_1_0	0	1	n/a	/n/a	-
1:247302018|247323115	1	247302018	247323115	359	5_52_74	225	0.761	n/a	/n/a	-
1:247318868|247323115	1	247318868	247323115	1739	91_85_87	243	0.935	n/a	/n/a	-
1:247318868|247323169	1	247318868	247323169	9	3_2_0	46	0.281	n/a	/n/a	-
1:247319708|247323115	1	247319708	247323115	157	36_37_12	242	0.565	n/a	/n/a	-
1:247319966|247323115	1	247319966	247323115	71	1_14_10	425	0.25	n/a	/n/a	-
1:247320134|247323115	1	247320134	247323115	11	3_3_1	559	0.038	n/a	/n/a	-
1:247320302|247323115	1	247320302	247323115	705	79_63_31	483	0.745	n/a	/n/a	-
1:247320386|247323115	1	247320386	247323115	23	10_10_0	709	0.061	n/a	/n/a	-
1:247322308|247323097	1	247322308	247323097	11	1_5_4	1360	0.016	n/a	/n/a	-
1:247322308|247323115	1	247322308	247323115	209	23_43_48	1254	0.25	n/a	/n/a	-
1:247322308|247323169	1	247322308	247323169	7	0_2_1	1061	0.013	n/a	/n/a	-
10:225934|255988	10	225934	255988	37	11_15_0	41	0.643	n/a	/n/a	+
10:225934|267296	10	225934	267296	70	24_22_4	21	0.87	n/a	/n/a	+
10:255829|267296	10	255829	267296	4	2_2_0	71	0.101	n/a	/n/a	+
10:355971|391050	10	355971	391050	7	1_1_2	19	0.424	n/a	/n/a	-
10:372946|387269	10	372946	387269	2	2_2_0	30	0.118	n/a	/n/a	-
10:465005|468973	10	465005	468973	7	1_2_1	59	0.192	n/a	/n/a	-
10:465005|486936	10	465005	486936	5	2_2_0	79	0.112	n/a	/n/a	-
10:465005|518489	10	465005	518489	5	4_4_0	86	0.104	n/a	/n/a	-
10:468764|532470	10	468764	532470	7	1_1_1	55	0.203	n/a	/n/a	-
10:486811|518489	10	486811	518489	54	20_15_6	123	0.468	n/a	/n/a	-
10:486811|532470	10	486811	532470	69	14_7_13	81	0.63	n/a	/n/a	-
10:518379|532470	10	518379	532470	52	11_9_19	103	0.502	n/a	/n/a	-
10:530721|532470	10	530721	532470	80	20_9_17	42	0.792	n/a	/n/a	-
10:674151|677012	10	674151	677012	5	2_2_0	5	0.667	n/a	/n/a	-
10:882343|890995	10	882343	890995	15	1_3_7	5	0.857	n/a	/n/a	-
10:909683|910210	10	909683	910210	10	2_2_1	96	0.172	n/a	/n/a	-
10:909683|931700	10	909683	931700	55	20_20_4	41	0.728	n/a	/n/a	-
10:930387|931700	10	930387	931700	8	3_4_3	120	0.118	n/a	/n/a	-
10:930387|936769	10	930387	936769	10	0_4_6	97	0.171	n/a	/n/a	-
10:1118056|1123943	10	1118056	1123943	3	1_1_1	17	0.261	n/a	/n/a	+
10:1118056|1126416	10	1118056	1126416	7	4_1_5	23	0.378	n/a	/n/a	+
10:1125951|1126416	10	1125951	1126416	13	2_1_5	48	0.351	n/a	/n/a	+
10:1125951|1132297	10	1125951	1132297	8	1_0_2	78	0.17	n/a	/n/a	+
10:1130343|1132297	10	1130343	1132297	4	1_0_2	67	0.107	n/a	/n/a	+
10:1130343|1142186	10	1130343	1142186	124	22_10_32	33	0.883	n/a	/n/a	+
10:1130343|1151207	10	1130343	1151207	37	8_14_3	31	0.705	n/a	/n/a	+
10:1130343|1170964	10	1130343	1170964	4	2_2_1	30	0.211	n/a	/n/a	+
10:1149539|1151207	10	1149539	1151207	4	3_1_0	15	0.348	n/a	/n/a	+
10:1149542|1151207	10	1149542	1151207	8	3_3_0	17	0.485	n/a	/n/a	+
10:3160974|3162236	10	3160974	3162236	11	4_6_1	63	0.259	n/a	/n/a	+
10:5751493|5754881	10	5751493	5754881	25	6_2_6	29	0.633	n/a	/n/a	+
10:5751493|5756170	10	5751493	5756170	51	14_7_15	5	0.953	n/a	/n/a	+
10:5815805|5842668	10	5815805	5842668	110	22_19_17	43	0.837	n/a	/n/a	-
10:5827105|5842668	10	5827105	5842668	153	38_32_13	51	0.857	n/a	/n/a	-
10:5827815|5842668	10	5827815	5842668	10	5_1_2	114	0.149	n/a	/n/a	-
10:5836848|5842668	10	5836848	5842668	112	22_18_7	184	0.549	n/a	/n/a	-
10:5838726|5842668	10	5838726	5842668	4	3_3_0	150	0.051	n/a	/n/a	-
10:6863749|6879970	10	6863749	6879970	4	3_0_2	22	0.267	n/a	/n/a	+
10:6874512|6879970	10	6874512	6879970	4	1_0_2	20	0.286	n/a	/n/a	+
10:6875605|6880164	10	6875605	6880164	9	1_5_4	6	0.75	n/a	/n/a	+
10:6875605|6880382	10	6875605	6880382	6	1_4_3	4	0.75	n/a	/n/a	+
10:7230586|7247890	10	7230586	7247890	8	1_1_2	17	0.485	n/a	/n/a	-
10:7262373|7269899	10	7262373	7269899	26	13_5_9	79	0.397	n/a	/n/a	-
10:7262373|7290611	10	7262373	7290611	18	6_4_4	138	0.207	n/a	/n/a	-
10:7262373|7318951	10	7262373	7318951	23	7_5_4	156	0.228	n/a	/n/a	-
10:7262373|7327916	10	7262373	7327916	33	11_8_6	77	0.462	n/a	/n/a	-
10:7269817|7327916	10	7269817	7327916	12	4_1_4	155	0.134	n/a	/n/a	-
10:7285520|7290611	10	7285520	7290611	6	3_2_3	176	0.064	n/a	/n/a	-
10:7285520|7318951	10	7285520	7318951	17	7_6_0	195	0.148	n/a	/n/a	-
10:7285520|7327916	10	7285520	7327916	188	42_31_22	116	0.764	n/a	/n/a	-
10:7290510|7327916	10	7290510	7327916	35	3_6_12	193	0.266	n/a	/n/a	-
10:7318854|7327916	10	7318854	7327916	800	51_49_79	198	0.89	n/a	/n/a	-
10:7409611|7412337	10	7409611	7412337	5	2_2_0	18	0.357	n/a	/n/a	-
10:7838084|7839141	10	7838084	7839141	6	0_2_1	55	0.179	n/a	/n/a	+
10:7839010|7844817	10	7839010	7844817	32	12_9_5	19	0.771	n/a	/n/a	+
10:11523769|11527910	10	11523769	11527910	12	4_3_2	25	0.49	n/a	/n/a	-
10:11560534|11569566	10	11560534	11569566	3	0_2_2	9	0.4	n/a	/n/a	-
10:11639630|11643979	10	11639630	11643979	14	4_1_5	11	0.718	n/a	/n/a	-
10:11789348|11791591	10	11789348	11791591	4	1_1_1	215	0.036	n/a	/n/a	+
10:11789348|11797607	10	11789348	11797607	32	11_12_1	26	0.711	n/a	/n/a	+
10:11797407|11805632	10	11797407	11805632	3	2_2_0	110	0.052	n/a	/n/a	+
10:11873759|11894214	10	11873759	11894214	3	1_1_1	97	0.058	n/a	/n/a	+
10:11891946|11894214	10	11891946	11894214	2	2_2_0	95	0.04	n/a	/n/a	+
10:11893996|11894214	10	11893996	11894214	93	23_24_5	169	0.524	n/a	/n/a	+
10:12039671|12056183	10	12039671	12056183	22	3_4_5	6	0.88	n/a	/n/a	-
10:12123471|12126750	10	12123471	12126750	20	6_9_0	65	0.381	n/a	/n/a	+
10:12123471|12133683	10	12123471	12133683	9	4_6_0	25	0.419	n/a	/n/a	+
10:12126539|12133683	10	12126539	12133683	2	1_2_0	54	0.069	n/a	/n/a	+
10:12130985|12131254	10	12130985	12131254	4	2_2_0	49	0.14	n/a	/n/a	+
10:12130985|12133683	10	12130985	12133683	9	1_2_1	57	0.24	n/a	/n/a	+
10:12130985|12136270	10	12130985	12136270	13	4_4_0	55	0.321	n/a	/n/a	+
10:12139683|12143180	10	12139683	12143180	4	1_2_0	36	0.182	n/a	/n/a	+
10:12148245|12150014	10	12148245	12150014	6	1_0_3	49	0.197	n/a	/n/a	+
10:12154899|12155063	10	12154899	12155063	8	1_2_1	80	0.167	n/a	/n/a	+
10:12159672|12160917	10	12159672	12160917	2	2_2_0	108	0.036	n/a	/n/a	+
10:12159672|12162266	10	12159672	12162266	14	4_1_5	77	0.267	n/a	/n/a	+
10:12160748|12162266	10	12160748	12162266	11	6_3_3	134	0.141	n/a	/n/a	+
10:12160748|12167187	10	12160748	12167187	2	1_0_2	108	0.036	n/a	/n/a	+
10:12251966|12259466	10	12251966	12259466	5	1_1_3	192	0.05	n/a	/n/a	+
10:12257739|12259466	10	12257739	12259466	5	0_1_2	222	0.043	n/a	/n/a	+
10:12257739|12277122	10	12257739	12277122	6	1_0_4	286	0.04	n/a	/n/a	+
10:12257739|12280484	10	12257739	12280484	98	22_0_34	175	0.528	n/a	/n/a	+
10:12272947|12280484	10	12272947	12280484	20	1_0_8	254	0.136	n/a	/n/a	+
10:12291580|12292468	10	12291580	12292468	19	4_7_0	166	0.186	n/a	/n/a	+
10:12431870|12445368	10	12431870	12445368	4	1_1_2	22	0.267	n/a	/n/a	+
10:12442015|12445368	10	12442015	12445368	80	22_23_5	26	0.86	n/a	/n/a	+
10:12442015|12445410	10	12442015	12445410	3	1_2_0	8	0.429	n/a	/n/a	+
10:12442702|12445368	10	12442702	12445368	13	4_5_0	30	0.464	n/a	/n/a	+
10:12442720|12445368	10	12442720	12445368	60	22_21_0	81	0.597	n/a	/n/a	+
10:12445101|12445368	10	12445101	12445368	7	1_3_1	123	0.102	n/a	/n/a	+
10:12445101|12448325	10	12445101	12448325	2	2_2_0	102	0.038	n/a	/n/a	+
10:12708735|12811798	10	12708735	12811798	4	2_2_0	8	0.5	n/a	/n/a	+
10:12802947|12811798	10	12802947	12811798	11	6_5_0	18	0.55	n/a	/n/a	+
10:12802947|12833232	10	12802947	12833232	4	1_1_1	25	0.242	n/a	/n/a	+
10:12833157|12858327	10	12833157	12858327	4	2_3_3	30	0.211	n/a	/n/a	+
10:12856194|12858327	10	12856194	12858327	18	5_4_5	34	0.514	n/a	/n/a	+
10:13320174|13340245	10	13320174	13340245	10	2_0_2	61	0.247	n/a	/n/a	-
10:13322976|13333912	10	13322976	13333912	2	2_1_1	1065	0.004	n/a	/n/a	-
10:13333831|13337606	10	13333831	13337606	8	1_1_3	754	0.021	n/a	/n/a	-
10:13333831|13340245	10	13333831	13340245	11	2_0_5	721	0.03	n/a	/n/a	-
10:14867478|14870271	10	14867478	14870271	15	5_5_0	6	0.833	n/a	/n/a	-
10:14896124|14897942	10	14896124	14897942	4	1_1_2	7	0.533	n/a	/n/a	+
10:14909082|14909908	10	14909082	14909908	5	2_3_1	9	0.526	n/a	/n/a	+
10:14938845|14943261	10	14938845	14943261	6	3_3_1	0	1	n/a	/n/a	+
10:14974853|14981868	10	14974853	14981868	4	1_1_2	6	0.571	n/a	/n/a	-
10:14987104|14987564	10	14987104	14987564	6	1_2_1	6	0.667	n/a	/n/a	-
10:15290638|15296878	10	15290638	15296878	4	2_1_0	16	0.333	n/a	/n/a	-
10:15290638|15326104	10	15290638	15326104	7	3_2_0	10	0.583	n/a	/n/a	-
10:15317854|15326104	10	15317854	15326104	5	2_3_2	23	0.303	n/a	/n/a	-
10:15838099|15889942	10	15838099	15889942	18	0_6_10	27	0.571	n/a	/n/a	-
10:15858834|15885271	10	15858834	15885271	18	2_3_8	107	0.252	n/a	/n/a	-
10:15858834|15889942	10	15858834	15889942	133	9_17_37	37	0.878	n/a	/n/a	-
10:15875629|15885271	10	15875629	15885271	13	1_5_8	167	0.135	n/a	/n/a	-
10:15875629|15889942	10	15875629	15889942	57	3_7_12	90	0.559	n/a	/n/a	-
10:15879203|15889942	10	15879203	15889942	2	2_2_0	260	0.015	n/a	/n/a	-
10:16794538|16796988	10	16794538	16796988	2	1_1_1	39	0.093	n/a	/n/a	-
10:16794538|16824083	10	16794538	16824083	13	2_0_9	29	0.473	n/a	/n/a	-
10:17199440|17202373	10	17199440	17202373	4	2_0_1	19	0.296	n/a	/n/a	-
10:17199440|17210916	10	17199440	17210916	12	6_5_1	6	0.8	n/a	/n/a	-
10:17632345|17646046	10	17632345	17646046	5	3_3_0	18	0.357	n/a	/n/a	-
10:17636204|17646046	10	17636204	17646046	11	6_6_0	15	0.595	n/a	/n/a	-
10:17645559|17646046	10	17645559	17646046	40	9_9_9	31	0.721	n/a	/n/a	-
10:18898774|18905222	10	18898774	18905222	11	2_4_4	3	0.88	n/a	/n/a	-
10:18955504|18957606	10	18955504	18957606	18	0_10_5	33	0.522	n/a	/n/a	+
10:20465928|20508031	10	20465928	20508031	4	1_0_3	7	0.533	n/a	/n/a	+
10:21234267|21250708	10	21234267	21250708	10	0_3_5	7	0.741	n/a	/n/a	-
10:21827762|21906136	10	21827762	21906136	2	1_1_1	26	0.133	n/a	/n/a	+
10:21903760|21940697	10	21903760	21940697	9	1_1_3	32	0.36	n/a	/n/a	+
10:21970261|22002879	10	21970261	22002879	4	2_3_2	27	0.229	n/a	/n/a	+
10:21970261|22016857	10	21970261	22016857	3	1_1_2	12	0.333	n/a	/n/a	+
10:22002701|22016857	10	22002701	22016857	25	8_4_6	40	0.556	n/a	/n/a	+
10:22880558|22882264	10	22880558	22882264	4	2_2_0	5	0.615	n/a	/n/a	-
10:24816865|24825822	10	24816865	24825822	2	1_1_1	6	0.4	n/a	/n/a	+
10:24918925|24924032	10	24918925	24924032	34	6_12_1	21	0.764	n/a	/n/a	-
10:25160927|25231365	10	25160927	25231365	4	0_3_3	15	0.348	n/a	/n/a	-
10:25226113|25231365	10	25226113	25231365	24	9_6_5	17	0.738	n/a	/n/a	-
10:26994215|27009288	10	26994215	27009288	6	3_4_0	0	1	n/a	/n/a	+
10:27009147|27024508	10	27009147	27024508	3	1_1_1	4	0.6	n/a	/n/a	+
10:27054147|27059274	10	27054147	27059274	3	1_1_1	16	0.273	n/a	/n/a	-
10:27301811|27303640	10	27301811	27303640	2	1_1_1	0	1	n/a	/n/a	-
10:27349274|27350171	10	27349274	27350171	17	1_3_8	3	0.919	n/a	/n/a	-
10:27356086|27375538	10	27356086	27375538	11	4_1_4	7	0.759	n/a	/n/a	-
10:27382278|27382728	10	27382278	27382728	3	2_1_1	17	0.261	n/a	/n/a	-
10:27420788|27434519	10	27420788	27434519	7	1_2_1	46	0.233	n/a	/n/a	-
10:27427696|27434519	10	27427696	27434519	7	0_2_3	35	0.286	n/a	/n/a	-
10:27431316|27434519	10	27431316	27434519	53	7_14_10	47	0.693	n/a	/n/a	-
10:27447478|27448687	10	27447478	27448687	5	2_2_0	26	0.278	n/a	/n/a	+
10:27453993|27454468	10	27453993	27454468	10	3_5_3	35	0.364	n/a	/n/a	+
10:27462050|27470510	10	27462050	27470510	3	1_1_1	9	0.4	n/a	/n/a	+
10:27469882|27470510	10	27469882	27470510	20	8_7_1	12	0.769	n/a	/n/a	+
10:27821436|27822923	10	27821436	27822923	37	6_3_14	36	0.673	n/a	/n/a	+
10:27855761|27867642	10	27855761	27867642	11	1_3_3	6	0.786	n/a	/n/a	+
10:27867300|27867642	10	27867300	27867642	2	1_2_0	11	0.267	n/a	/n/a	+
10:27867300|27882931	10	27867300	27882931	3	2_1_0	11	0.353	n/a	/n/a	+
10:28023385|28024303	10	28023385	28024303	14	7_5_0	4	0.875	n/a	/n/a	-
10:28149554|28151551	10	28149554	28151551	3	2_2_0	2	0.75	n/a	/n/a	-
10:28196592|28233891	10	28196592	28233891	8	3_3_2	13	0.552	n/a	/n/a	-
10:28223939|28225809	10	28223939	28225809	25	10_6_0	33	0.602	n/a	/n/a	-
10:28358701|28378770	10	28358701	28378770	23	7_7_3	10	0.821	n/a	/n/a	-
10:28408580|28409597	10	28408580	28409597	5	0_2_2	8	0.556	n/a	/n/a	-
10:28420489|28438988	10	28420489	28438988	14	3_0_4	21	0.571	n/a	/n/a	-
10:28872328|28879761	10	28872328	28879761	63	14_16_17	50	0.716	n/a	/n/a	+
10:28884662|28897360	10	28884662	28897360	2	2_1_0	51	0.073	n/a	/n/a	+
10:30013997|30014339	10	30013997	30014339	9	2_1_0	2	0.9	n/a	/n/a	-
10:30072217|30072589	10	30072217	30072589	3	1_0_2	39	0.133	n/a	/n/a	-
10:30736711|30740673	10	30736711	30740673	12	6_4_0	16	0.6	n/a	/n/a	+
10:30739187|30739448	10	30739187	30739448	7	4_4_0	40	0.259	n/a	/n/a	+
10:30739187|30740673	10	30739187	30740673	15	5_4_2	24	0.556	n/a	/n/a	+
10:31230504|31312406	10	31230504	31312406	3	2_0_2	23	0.207	n/a	/n/a	-
10:31263523|31273355	10	31263523	31273355	2	2_0_2	11	0.267	n/a	/n/a	-
10:31644073|31647262	10	31644073	31647262	17	1_4_8	9	0.791	n/a	/n/a	+
10:31644073|31676195	10	31644073	31676195	6	0_3_1	31	0.279	n/a	/n/a	+
10:31644076|31647262	10	31644076	31647262	7	0_3_4	9	0.609	n/a	/n/a	+
10:31644076|31676195	10	31644076	31676195	9	1_4_2	31	0.367	n/a	/n/a	+
10:31661947|31676195	10	31661947	31676195	7	4_3_1	25	0.359	n/a	/n/a	+
10:31661947|31676727	10	31661947	31676727	8	2_2_1	2	0.889	n/a	/n/a	+
10:31662051|31676727	10	31662051	31676727	4	1_0_2	34	0.19	n/a	/n/a	+
10:32197100|32199491	10	32197100	32199491	370	58_9_88	99	0.882	n/a	/n/a	-
10:32197100|32211888	10	32197100	32211888	3	2_2_0	89	0.063	n/a	/n/a	-
10:32309950|32310215	10	32309950	32310215	11	3_0_3	11	0.667	n/a	/n/a	-
10:32327091|32339451	10	32327091	32339451	8	0_3_1	13	0.552	n/a	/n/a	-
10:32337392|32339451	10	32337392	32339451	10	4_5_1	21	0.488	n/a	/n/a	-
10:32740520|32745262	10	32740520	32745262	5	2_1_2	17	0.37	n/a	/n/a	+
10:32740520|32751977	10	32740520	32751977	5	1_0_2	29	0.256	n/a	/n/a	+
10:32740520|32762951	10	32740520	32762951	8	2_2_2	38	0.296	n/a	/n/a	+
10:32740520|32770710	10	32740520	32770710	8	3_1_2	11	0.593	n/a	/n/a	+
10:32759992|32762951	10	32759992	32762951	13	6_0_7	31	0.456	n/a	/n/a	+
10:32832228|32873232	10	32832228	32873232	3	2_0_2	17	0.261	n/a	/n/a	+
10:33218750|33224486	10	33218750	33224486	7	3_1_2	66	0.175	n/a	/n/a	-
10:33542956|33552801	10	33542956	33552801	2	2_1_0	97	0.04	n/a	/n/a	-
10:33552574|33552801	10	33552574	33552801	3	2_0_1	82	0.068	n/a	/n/a	-
10:34558585|34573173	10	34558585	34573173	34	12_11_4	13	0.84	n/a	/n/a	-
10:34620045|34630744	10	34620045	34630744	8	3_1_0	15	0.516	n/a	/n/a	-
10:34636893|34649187	10	34636893	34649187	8	4_3_2	17	0.485	n/a	/n/a	-
10:34648075|34649187	10	34648075	34649187	4	2_2_0	26	0.235	n/a	/n/a	-
10:34688258|34759191	10	34688258	34759191	4	2_2_0	32	0.2	n/a	/n/a	-
10:34739245|34806087	10	34739245	34806087	18	4_6_1	35	0.507	n/a	/n/a	-
10:34759013|34806087	10	34759013	34806087	9	5_5_0	59	0.234	n/a	/n/a	-
10:34796884|34806087	10	34796884	34806087	3	0_2_1	34	0.15	n/a	/n/a	-
10:34805907|34834216	10	34805907	34834216	9	3_1_3	16	0.529	n/a	/n/a	-
10:34985246|34986306	10	34985246	34986306	2	1_1_1	22	0.154	n/a	/n/a	-
10:34985246|34989132	10	34985246	34989132	10	1_5_0	24	0.455	n/a	/n/a	-
10:35305120|35317815	10	35305120	35317815	7	3_2_4	10	0.583	n/a	/n/a	-
10:35314060|35322201	10	35314060	35322201	3	2_1_1	5	0.545	n/a	/n/a	-
10:35320228|35322201	10	35320228	35322201	5	2_2_1	7	0.588	n/a	/n/a	-
10:35349802|35360267	10	35349802	35360267	29	6_10_6	9	0.866	n/a	/n/a	-
10:35772332|35805551	10	35772332	35805551	7	4_2_4	65	0.177	n/a	/n/a	+
10:35790429|35819171	10	35790429	35819171	8	0_2_2	113	0.124	n/a	/n/a	+
10:35805451|35819171	10	35805451	35819171	15	6_7_3	110	0.214	n/a	/n/a	+
10:35805451|35842113	10	35805451	35842113	4	0_2_2	144	0.053	n/a	/n/a	+
10:35814892|35842113	10	35814892	35842113	8	1_5_3	175	0.084	n/a	/n/a	+
10:35818901|35842113	10	35818901	35842113	7	0_2_2	173	0.075	n/a	/n/a	+
10:38301226|38306314	10	38301226	38306314	4	2_2_3	8	0.5	n/a	/n/a	+
10:38301226|38323328	10	38301226	38323328	5	1_0_4	0	1	n/a	/n/a	+
10:43090043|43132420	10	43090043	43132420	4	3_0_1	0	1	n/a	/n/a	-
10:43127377|43132420	10	43127377	43132420	7	2_1_1	14	0.5	n/a	/n/a	-
10:43650345|43671480	10	43650345	43671480	3	2_1_2	1	0.857	n/a	/n/a	+
10:43654163|43662546	10	43654163	43662546	9	3_5_3	0	1	n/a	/n/a	+
10:43654163|43671480	10	43654163	43671480	12	4_2_4	1	0.96	n/a	/n/a	+
10:43659314|43671480	10	43659314	43671480	3	3_2_0	13	0.316	n/a	/n/a	+
10:43890078|43892038	10	43890078	43892038	3	1_2_1	276	0.021	n/a	/n/a	-
10:45954568|45959775	10	45954568	45959775	7	4_3_1	19	0.424	n/a	/n/a	-
10:46143742|46143982	10	46143742	46143982	3	2_1_0	20	0.231	n/a	/n/a	-
10:46158028|46159290	10	46158028	46159290	20	5_9_2	7	0.851	n/a	/n/a	-
10:46158990|46159290	10	46158990	46159290	105	30_27_5	38	0.847	n/a	/n/a	-
10:47121121|47122996	10	47121121	47122996	4	3_2_0	10	0.444	n/a	/n/a	-
10:47136433|47137184	10	47136433	47137184	2	1_1_1	124	0.031	n/a	/n/a	+
10:49517298|49618211	10	49517298	49618211	8	0_1_3	41	0.281	n/a	/n/a	+
10:49533940|49613024	10	49533940	49613024	5	2_4_1	236	0.041	n/a	/n/a	+
10:49533940|49618211	10	49533940	49618211	4	0_2_2	45	0.151	n/a	/n/a	+
10:49609655|49613024	10	49609655	49613024	53	17_16_6	248	0.299	n/a	/n/a	+
10:49609655|49618211	10	49609655	49618211	135	39_37_6	59	0.821	n/a	/n/a	+
10:49612895|49628363	10	49612895	49628363	8	2_4_1	262	0.058	n/a	/n/a	+
10:49763508|49791197	10	49763508	49791197	6	2_3_1	15	0.444	n/a	/n/a	-
10:50690733|50714058	10	50690733	50714058	3	1_2_1	5	0.545	n/a	/n/a	-
10:50701163|50708742	10	50701163	50708742	6	2_2_0	63	0.16	n/a	/n/a	-
10:50701163|50714058	10	50701163	50714058	36	10_8_3	17	0.809	n/a	/n/a	-
10:51040849|51051678	10	51040849	51051678	23	5_7_8	36	0.561	n/a	/n/a	-
10:51087719|51093341	10	51087719	51093341	7	3_2_0	53	0.209	n/a	/n/a	-
10:51579128|51581378	10	51579128	51581378	16	5_3_5	33	0.492	n/a	/n/a	+
10:52066604|52071175	10	52066604	52071175	7	3_3_0	37	0.275	n/a	/n/a	-
10:52100147|52104105	10	52100147	52104105	10	1_2_1	9	0.69	n/a	/n/a	-
10:52103252|52104105	10	52103252	52104105	21	7_5_3	32	0.568	n/a	/n/a	-
10:52193236|52220574	10	52193236	52220574	3	1_2_1	71	0.078	n/a	/n/a	-
10:52193236|52226692	10	52193236	52226692	15	3_1_7	52	0.366	n/a	/n/a	-
10:52193236|52350007	10	52193236	52350007	82	17_19_22	17	0.906	n/a	/n/a	-
10:52220433|52350007	10	52220433	52350007	8	3_3_0	81	0.165	n/a	/n/a	-
10:52268394|52350007	10	52268394	52350007	15	2_1_2	16	0.652	n/a	/n/a	-
10:52276083|52350007	10	52276083	52350007	2	1_1_1	12	0.25	n/a	/n/a	-
10:52279591|52350007	10	52279591	52350007	7	2_1_4	59	0.192	n/a	/n/a	-
10:60036877|60048163	10	60036877	60048163	6	2_1_1	26	0.316	n/a	/n/a	+
10:60116398|60127776	10	60116398	60127776	3	0_1_2	15	0.286	n/a	/n/a	+
10:60121098|60124636	10	60121098	60124636	4	1_0_2	19	0.296	n/a	/n/a	+
10:60347975|60348453	10	60347975	60348453	2	2_2_0	13	0.235	n/a	/n/a	+
10:60374053|60380661	10	60374053	60380661	12	3_0_4	21	0.533	n/a	/n/a	+
10:60380615|60461903	10	60380615	60461903	4	2_1_3	32	0.2	n/a	/n/a	+
10:60549022|60553375	10	60549022	60553375	21	9_9_2	22	0.656	n/a	/n/a	+
10:61564178|61574513	10	61564178	61574513	7	1_2_1	67	0.173	n/a	/n/a	-
10:61572393|61612460	10	61572393	61612460	8	2_2_0	46	0.258	n/a	/n/a	-
10:61592283|61612460	10	61592283	61612460	37	11_9_4	79	0.484	n/a	/n/a	-
10:61844360|61845011	10	61844360	61845011	8	3_3_0	0	1	n/a	/n/a	-
10:62539899|62545545	10	62539899	62545545	3	0_1_2	100	0.057	n/a	/n/a	+
10:63699942|63760080	10	63699942	63760080	4	2_1_0	28	0.222	n/a	/n/a	+
10:63759850|63760080	10	63759850	63760080	5	2_4_0	25	0.286	n/a	/n/a	+
10:63907594|63908825	10	63907594	63908825	6	3_2_0	2	0.857	n/a	/n/a	-
10:63958042|63964781	10	63958042	63964781	3	3_3_0	2	0.75	n/a	/n/a	-
10:64148155|64158536	10	64148155	64158536	6	3_1_2	25	0.324	n/a	/n/a	+
10:64148155|64159552	10	64148155	64159552	13	4_6_0	10	0.722	n/a	/n/a	+
10:64148155|64219556	10	64148155	64219556	18	5_3_3	9	0.8	n/a	/n/a	+
10:64948928|64949206	10	64948928	64949206	5	3_3_0	9	0.526	n/a	/n/a	-
10:65021216|65056841	10	65021216	65056841	2	1_1_1	6	0.4	n/a	/n/a	-
10:65024411|65214849	10	65024411	65214849	3	1_2_0	11	0.353	n/a	/n/a	-
10:65140078|65164725	10	65140078	65164725	3	1_0_2	19	0.24	n/a	/n/a	-
10:65140078|65169748	10	65140078	65169748	12	6_5_1	15	0.615	n/a	/n/a	-
10:65140078|65214849	10	65140078	65214849	70	19_21_7	16	0.897	n/a	/n/a	-
10:65140078|65229368	10	65140078	65229368	3	2_1_1	15	0.286	n/a	/n/a	-
10:65213156|65214849	10	65213156	65214849	3	2_2_0	6	0.5	n/a	/n/a	-
10:65227326|65229368	10	65227326	65229368	3	2_3_0	3	0.667	n/a	/n/a	-
10:65326098|65359043	10	65326098	65359043	7	1_2_2	31	0.311	n/a	/n/a	+
10:69647175|69648881	10	69647175	69648881	11	4_5_1	55	0.286	n/a	/n/a	+
10:69647175|69651312	10	69647175	69651312	8	4_4_0	23	0.41	n/a	/n/a	+
10:69647175|69666694	10	69647175	69666694	7	2_2_1	26	0.35	n/a	/n/a	+
10:69648640|69651312	10	69648640	69651312	15	8_6_0	55	0.353	n/a	/n/a	+
10:69665920|69667882	10	69665920	69667882	2	1_0_2	19	0.174	n/a	/n/a	+
10:69714352|69748592	10	69714352	69748592	3	2_2_0	187	0.031	n/a	/n/a	-
10:69714352|69773943	10	69714352	69773943	23	9_10_4	60	0.434	n/a	/n/a	-
10:69726440|69752439	10	69726440	69752439	15	6_5_3	195	0.133	n/a	/n/a	-
10:69726440|69773943	10	69726440	69773943	94	27_28_10	63	0.749	n/a	/n/a	-
10:69747800|69773943	10	69747800	69773943	9	2_3_2	21	0.462	n/a	/n/a	-
10:69748420|69752439	10	69748420	69752439	7	3_2_2	302	0.044	n/a	/n/a	-
10:69748420|69773943	10	69748420	69773943	72	19_25_2	178	0.447	n/a	/n/a	-
10:69751956|69752439	10	69751956	69752439	4	2_1_0	280	0.028	n/a	/n/a	-
10:69751956|69773943	10	69751956	69773943	34	12_8_2	154	0.306	n/a	/n/a	-
10:69773783|69797926	10	69773783	69797926	4	2_1_1	162	0.047	n/a	/n/a	-
10:69785303|69797926	10	69785303	69797926	4	3_1_2	43	0.157	n/a	/n/a	-
10:69785303|69804320	10	69785303	69804320	41	17_17_1	42	0.661	n/a	/n/a	-
10:69792535|69804320	10	69792535	69804320	6	4_5_0	52	0.188	n/a	/n/a	-
10:69797850|69804320	10	69797850	69804320	9	0_2_4	58	0.237	n/a	/n/a	-
10:69797850|69826974	10	69797850	69826974	16	4_5_4	42	0.432	n/a	/n/a	-
10:69881195|69882097	10	69881195	69882097	3	1_2_0	29	0.171	n/a	/n/a	+
10:69902697|69905283	10	69902697	69905283	9	4_1_3	157	0.103	n/a	/n/a	+
10:69902697|69909868	10	69902697	69909868	87	23_12_16	103	0.628	n/a	/n/a	+
10:69902697|69918384	10	69902697	69918384	15	8_6_0	69	0.303	n/a	/n/a	+
10:69902697|69925575	10	69902697	69925575	4	2_3_0	81	0.09	n/a	/n/a	+
10:69935080|69955289	10	69935080	69955289	10	3_3_0	49	0.29	n/a	/n/a	+
10:69961586|69966660	10	69961586	69966660	7	3_3_1	67	0.173	n/a	/n/a	+
10:69961586|69970304	10	69961586	69970304	6	3_4_1	47	0.203	n/a	/n/a	+
10:69966527|69970304	10	69966527	69970304	30	5_12_0	33	0.645	n/a	/n/a	+
10:70056023|70066660	10	70056023	70066660	7	0_1_2	17	0.452	n/a	/n/a	-
10:70056023|70066663	10	70056023	70066663	10	1_3_1	17	0.541	n/a	/n/a	-
10:70115110|70123870	10	70115110	70123870	4	1_2_1	1	0.889	n/a	/n/a	-
10:70143555|70145885	10	70143555	70145885	3	2_0_2	5	0.545	n/a	/n/a	-
10:70152895|70154208	10	70152895	70154208	26	2_10_9	24	0.684	n/a	/n/a	-
10:70152895|70161494	10	70152895	70161494	3	2_2_0	14	0.3	n/a	/n/a	-
10:70153832|70154208	10	70153832	70154208	4	1_3_1	30	0.211	n/a	/n/a	-
10:70190193|70190417	10	70190193	70190417	24	11_9_1	23	0.676	n/a	/n/a	-
10:70202674|70204840	10	70202674	70204840	5	1_1_1	23	0.303	n/a	/n/a	-
10:70202674|70206170	10	70202674	70206170	9	3_3_1	22	0.45	n/a	/n/a	-
10:70202674|70210004	10	70202674	70210004	7	4_5_0	27	0.341	n/a	/n/a	-
10:70209785|70229920	10	70209785	70229920	9	4_3_0	55	0.247	n/a	/n/a	-
10:70218496|70229920	10	70218496	70229920	7	2_4_0	52	0.212	n/a	/n/a	-
10:70218861|70225569	10	70218861	70225569	7	1_1_2	234	0.056	n/a	/n/a	-
10:70218861|70229920	10	70218861	70229920	210	42_50_10	67	0.862	n/a	/n/a	-
10:70225424|70229920	10	70225424	70229920	18	5_6_0	295	0.109	n/a	/n/a	-
10:70227880|70229920	10	70227880	70229920	428	58_62_18	330	0.722	n/a	/n/a	-
10:70246901|70253327	10	70246901	70253327	26	4_6_7	101	0.34	n/a	/n/a	-
10:70246901|70263452	10	70246901	70263452	7	0_1_5	91	0.133	n/a	/n/a	-
10:70246901|70266475	10	70246901	70266475	15	0_4_4	43	0.411	n/a	/n/a	-
10:70246901|70276600	10	70246901	70276600	7	0_2_5	42	0.25	n/a	/n/a	-
10:70246901|70277050	10	70246901	70277050	4	1_1_2	33	0.195	n/a	/n/a	-
10:70506918|70507323	10	70506918	70507323	6	2_2_0	45	0.211	n/a	/n/a	+
10:70513609|70517134	10	70513609	70517134	4	1_0_2	25	0.242	n/a	/n/a	+
10:70545893|70546449	10	70545893	70546449	37	11_18_7	19	0.796	n/a	/n/a	+
10:70549467|70549672	10	70549467	70549672	5	1_3_1	6	0.625	n/a	/n/a	+
10:70641714|70652529	10	70641714	70652529	2	2_1_0	5	0.444	n/a	/n/a	+
10:70666467|70670138	10	70666467	70670138	5	4_3_1	7	0.588	n/a	/n/a	+
10:70693955|70695835	10	70693955	70695835	3	2_2_0	3	0.667	n/a	/n/a	+
10:70696692|70700950	10	70696692	70700950	5	4_3_1	16	0.385	n/a	/n/a	+
10:70696692|70703013	10	70696692	70703013	29	9_2_2	12	0.829	n/a	/n/a	+
10:70723047|70725250	10	70723047	70725250	11	3_4_2	143	0.133	n/a	/n/a	+
10:70723047|70726959	10	70723047	70726959	26	13_12_3	134	0.28	n/a	/n/a	+
10:70723047|70728877	10	70723047	70728877	3	2_1_0	123	0.047	n/a	/n/a	+
10:70733301|70741337	10	70733301	70741337	13	4_0_3	80	0.245	n/a	/n/a	+
10:70760180|70768681	10	70760180	70768681	7	2_3_1	20	0.412	n/a	/n/a	+
10:70760180|70770771	10	70760180	70770771	3	1_1_1	13	0.316	n/a	/n/a	+
10:70915568|70917967	10	70915568	70917967	8	3_5_2	18	0.471	n/a	/n/a	+
10:70945743|70947512	10	70945743	70947512	2	0_1_2	49	0.075	n/a	/n/a	+
10:70945743|70949191	10	70945743	70949191	5	1_2_1	24	0.294	n/a	/n/a	+
10:70945743|70951522	10	70945743	70951522	4	2_2_1	44	0.154	n/a	/n/a	+
10:70958128|70962799	10	70958128	70962799	4	3_1_1	100	0.074	n/a	/n/a	+
10:71124338|71124658	10	71124338	71124658	3	1_2_1	95	0.059	n/a	/n/a	+
10:71142243|71142547	10	71142243	71142547	7	2_1_0	83	0.144	n/a	/n/a	+
10:71243447|71258152	10	71243447	71258152	7	3_3_1	73	0.161	n/a	/n/a	+
10:71917520|71921687	10	71917520	71921687	4	1_1_1	41	0.163	n/a	/n/a	-
10:71966020|71969441	10	71966020	71969441	6	1_1_1	25	0.324	n/a	/n/a	-
10:71966020|71978573	10	71966020	71978573	6	1_0_2	0	1	n/a	/n/a	-
10:71977568|71978573	10	71977568	71978573	13	6_3_4	0	1	n/a	/n/a	-
10:72099752|72100458	10	72099752	72100458	21	3_6_1	84	0.333	n/a	/n/a	-
10:72604230|72610967	10	72604230	72610967	23	12_7_4	97	0.322	n/a	/n/a	+
10:72604230|72619256	10	72604230	72619256	41	11_10_1	90	0.477	n/a	/n/a	+
10:72604230|72628190	10	72604230	72628190	3	2_1_1	96	0.059	n/a	/n/a	+
10:73737449|73737907	10	73737449	73737907	9	2_2_0	23	0.439	n/a	/n/a	+
10:73737453|73737907	10	73737453	73737907	4	2_3_0	23	0.258	n/a	/n/a	+
10:73853450|73854555	10	73853450	73854555	3	1_2_1	11	0.353	n/a	/n/a	-
10:73887840|73892939	10	73887840	73892939	19	2_5_4	86	0.306	n/a	/n/a	-
10:73887840|73912746	10	73887840	73912746	26	3_5_7	69	0.43	n/a	/n/a	-
10:73887840|73921432	10	73887840	73921432	4	1_2_0	79	0.092	n/a	/n/a	-
10:73887840|73963282	10	73887840	73963282	7	2_3_0	75	0.157	n/a	/n/a	-
10:73912627|73963282	10	73912627	73963282	6	2_3_1	117	0.093	n/a	/n/a	-
10:73921296|73956747	10	73921296	73956747	3	2_1_1	76	0.073	n/a	/n/a	-
10:73956569|73970589	10	73956569	73970589	5	2_1_0	105	0.087	n/a	/n/a	-
10:73963185|73970589	10	73963185	73970589	6	2_2_5	94	0.113	n/a	/n/a	-
10:73983646|73990198	10	73983646	73990198	8	5_1_2	297	0.051	n/a	/n/a	+
10:74100547|74100928	10	74100547	74100928	39	6_13_7	80	0.494	n/a	/n/a	-
10:74267913|74322821	10	74267913	74322821	7	2_2_0	48	0.226	n/a	/n/a	-
10:74293504|74322821	10	74293504	74322821	5	0_3_3	35	0.222	n/a	/n/a	-
10:74310937|74322821	10	74310937	74322821	4	2_2_0	42	0.16	n/a	/n/a	-
10:74310937|74326552	10	74310937	74326552	4	1_3_0	20	0.286	n/a	/n/a	-
10:74322653|74326552	10	74322653	74326552	4	1_2_0	45	0.151	n/a	/n/a	-
10:74468041|74475660	10	74468041	74475660	225	25_21_53	100	0.818	n/a	/n/a	+
10:74468041|74496329	10	74468041	74496329	13	3_2_3	33	0.441	n/a	/n/a	+
10:74468041|74501603	10	74468041	74501603	11	2_4_3	43	0.338	n/a	/n/a	+
10:74468041|74520430	10	74468041	74520430	2	2_2_0	16	0.2	n/a	/n/a	+
10:74468041|74594186	10	74468041	74594186	3	1_0_2	32	0.158	n/a	/n/a	+
10:74474869|74475660	10	74474869	74475660	227	34_37_20	248	0.647	n/a	/n/a	+
10:74474869|74479203	10	74474869	74479203	20	5_1_4	183	0.179	n/a	/n/a	+
10:74474869|74496329	10	74474869	74496329	5	3_1_2	191	0.05	n/a	/n/a	+
10:74474869|74501603	10	74474869	74501603	3	2_2_0	199	0.029	n/a	/n/a	+
10:74474869|74502031	10	74474869	74502031	3	2_2_0	199	0.029	n/a	/n/a	+
10:74501480|74502031	10	74501480	74502031	54	15_12_13	67	0.617	n/a	/n/a	+
10:74549934|74550689	10	74549934	74550689	9	1_1_3	11	0.621	n/a	/n/a	+
10:74594117|74620285	10	74594117	74620285	7	1_2_4	28	0.333	n/a	/n/a	+
10:74628461|74631338	10	74628461	74631338	13	5_6_1	95	0.215	n/a	/n/a	+
10:74658422|74660242	10	74658422	74660242	7	3_3_0	7	0.667	n/a	/n/a	+
10:74666354|74673226	10	74666354	74673226	8	2_3_1	4	0.8	n/a	/n/a	+
10:74764700|74776657	10	74764700	74776657	6	1_1_3	16	0.429	n/a	/n/a	-
10:74790029|74806859	10	74790029	74806859	9	2_3_0	58	0.237	n/a	/n/a	-
[truncated: 14,006 more rows]

## Sheet: SRR5889367_NCM460_rep3
circRNA_ID	chr	circRNA_start	circRNA_end	#junction_reads	SM_MS_SMS	#non_junction_reads	junction_reads_ratio	circRNA_type	gene_id	strand
1:568947|569173	1	568947	569173	14	6_0_1	17730	0.002	n/a	/n/a	-
1:569476|569637	1	569476	569637	4	2_3_0	6829	0.001	n/a	/n/a	-
1:865535|874792	1	865535	874792	8	3_3_1	44	0.267	n/a	/n/a	+
1:1158624|1159348	1	1158624	1159348	9	2_2_0	238	0.07	n/a	/n/a	-
1:1192372|1192690	1	1192372	1192690	24	8_7_0	147	0.246	n/a	/n/a	-
1:1192372|1198766	1	1192372	1198766	10	3_0_3	92	0.179	n/a	/n/a	-
1:1192372|1203372	1	1192372	1203372	7	5_2_0	78	0.152	n/a	/n/a	-
1:1417518|1454370	1	1417518	1454370	6	3_3_0	17	0.414	n/a	/n/a	+
1:1430865|1464711	1	1430865	1464711	10	6_6_0	24	0.455	n/a	/n/a	+
1:1496712|1500296	1	1496712	1500296	6	2_2_0	47	0.203	n/a	/n/a	-
1:1499985|1500296	1	1499985	1500296	8	3_3_0	34	0.32	n/a	/n/a	-
1:1586823|1650894	1	1586823	1650894	5	1_2_1	11	0.476	n/a	/n/a	-
1:1586823|1654270	1	1586823	1654270	6	3_1_1	3	0.8	n/a	/n/a	-
1:1599766|1671143	1	1599766	1671143	13	5_5_3	10	0.722	n/a	/n/a	-
1:1666129|1671143	1	1666129	1671143	6	4_4_0	12	0.5	n/a	/n/a	-
1:1724684|1747301	1	1724684	1747301	4	1_3_2	763	0.01	n/a	/n/a	-
1:1724684|1749314	1	1724684	1749314	8	1_1_4	653	0.024	n/a	/n/a	-
1:1735858|1737977	1	1735858	1737977	45	16_9_6	822	0.099	n/a	/n/a	-
1:1735858|1749314	1	1735858	1749314	87	17_2_24	629	0.217	n/a	/n/a	-
1:1735858|1756938	1	1735858	1756938	6	1_2_0	372	0.031	n/a	/n/a	-
1:1737914|1756921	1	1737914	1756921	17	2_1_5	591	0.054	n/a	/n/a	-
1:1737914|1756938	1	1737914	1756938	4	0_2_2	507	0.016	n/a	/n/a	-
1:1747195|1756938	1	1747195	1756938	17	3_3_4	831	0.039	n/a	/n/a	-
1:1747195|1770677	1	1747195	1770677	10	2_0_3	724	0.027	n/a	/n/a	-
1:1805397|1811341	1	1805397	1811341	5	1_1_1	32	0.238	n/a	/n/a	-
1:2234417|2236024	1	2234417	2236024	8	3_3_0	104	0.133	n/a	/n/a	+
1:2324709|2332374	1	2324709	2332374	7	2_0_2	72	0.163	n/a	/n/a	+
1:2324709|2334520	1	2324709	2334520	5	1_0_2	98	0.093	n/a	/n/a	+
1:2327223|2330953	1	2327223	2330953	3	1_1_1	185	0.031	n/a	/n/a	+
1:2327223|2332374	1	2327223	2332374	22	1_1_5	105	0.295	n/a	/n/a	+
1:2336479|2336661	1	2336479	2336661	9	3_2_1	311	0.055	n/a	/n/a	-
1:3697715|3698165	1	3697715	3698165	4	2_2_0	172	0.044	n/a	/n/a	-
1:5987709|5993389	1	5987709	5993389	17	4_4_0	33	0.507	n/a	/n/a	-
1:5987709|6012896	1	5987709	6012896	11	3_2_0	68	0.244	n/a	/n/a	-
1:6007164|6012896	1	6007164	6012896	26	7_5_2	65	0.444	n/a	/n/a	-
1:6007164|6022009	1	6007164	6022009	34	7_8_4	40	0.63	n/a	/n/a	-
1:6021854|6029319	1	6021854	6029319	5	1_1_2	71	0.123	n/a	/n/a	-
1:6291962|6293703	1	6291962	6293703	9	4_5_0	46	0.281	n/a	/n/a	-
1:6341162|6355040	1	6341162	6355040	10	3_3_0	43	0.317	n/a	/n/a	-
1:6601890|6605240	1	6601890	6605240	6	1_1_3	24	0.333	n/a	/n/a	-
1:6609631|6610675	1	6609631	6610675	2	1_1_1	7	0.364	n/a	/n/a	-
1:6727769|6741097	1	6727769	6741097	4	1_1_2	19	0.296	n/a	/n/a	-
1:6867043|6885270	1	6867043	6885270	19	3_4_3	34	0.528	n/a	/n/a	+
1:7837220|7838229	1	7837220	7838229	47	11_2_9	37	0.718	n/a	/n/a	+
1:8482787|8617582	1	8482787	8617582	16	3_1_3	74	0.302	n/a	/n/a	-
1:8482787|8674745	1	8482787	8674745	8	1_2_3	33	0.327	n/a	/n/a	-
1:8525985|8568734	1	8525985	8568734	10	1_1_4	184	0.098	n/a	/n/a	-
1:8525985|8601377	1	8525985	8601377	20	2_4_6	336	0.106	n/a	/n/a	-
1:8525985|8617582	1	8525985	8617582	15	1_3_5	89	0.252	n/a	/n/a	-
1:8525985|8674745	1	8525985	8674745	7	2_2_0	48	0.226	n/a	/n/a	-
1:8555123|8601377	1	8555123	8601377	39	8_6_8	364	0.176	n/a	/n/a	-
1:8555123|8617582	1	8555123	8617582	81	9_7_17	119	0.577	n/a	/n/a	-
1:8555123|8674745	1	8555123	8674745	60	5_6_10	78	0.606	n/a	/n/a	-
1:8568686|8617582	1	8568686	8617582	55	1_5_14	281	0.281	n/a	/n/a	-
1:8568686|8674745	1	8568686	8674745	27	3_8_6	243	0.182	n/a	/n/a	-
1:8601273|8617582	1	8601273	8617582	152	14_15_26	341	0.471	n/a	/n/a	-
1:8601273|8674745	1	8601273	8674745	179	15_21_24	301	0.543	n/a	/n/a	-
1:8616534|8674745	1	8616534	8674745	25	7_8_2	342	0.128	n/a	/n/a	-
1:8674620|8684439	1	8674620	8684439	26	7_2_5	62	0.456	n/a	/n/a	-
1:9931245|9938047	1	9931245	9938047	16	2_4_3	41	0.438	n/a	/n/a	-
1:9991949|9994918	1	9991949	9994918	204	19_24_29	57	0.877	n/a	/n/a	-
1:9991949|9995685	1	9991949	9995685	14	1_2_1	26	0.519	n/a	/n/a	-
1:10032076|10041228	1	10032076	10041228	12	2_3_0	24	0.5	n/a	/n/a	+
1:10132086|10143783	1	10132086	10143783	6	1_2_0	17	0.414	n/a	/n/a	+
1:10155519|10165802	1	10155519	10165802	127	22_22_5	39	0.867	n/a	/n/a	+
1:10176221|10177658	1	10176221	10177658	4	1_1_3	29	0.216	n/a	/n/a	+
1:10177517|10179671	1	10177517	10179671	8	2_1_0	27	0.372	n/a	/n/a	+
1:10209242|10211619	1	10209242	10211619	12	3_3_1	10	0.706	n/a	/n/a	+
1:10327438|10328321	1	10327438	10328321	17	4_4_2	45	0.43	n/a	/n/a	+
1:10331560|10335561	1	10331560	10335561	12	3_0_3	31	0.436	n/a	/n/a	+
1:10463128|10464336	1	10463128	10464336	12	0_4_1	140	0.146	n/a	/n/a	+
1:10493899|10500470	1	10493899	10500470	14	1_1_1	1	0.966	n/a	/n/a	+
1:10500404|10502498	1	10500404	10502498	12	0_2_3	11	0.686	n/a	/n/a	+
1:11130957|11137005	1	11130957	11137005	2	1_2_1	157	0.025	n/a	/n/a	-
1:11133991|11137005	1	11133991	11137005	41	6_9_8	136	0.376	n/a	/n/a	-
1:11150611|11151654	1	11150611	11151654	5	1_1_1	8	0.556	n/a	/n/a	-
1:11181303|11182183	1	11181303	11182183	20	5_5_2	36	0.526	n/a	/n/a	-
1:12061458|12062160	1	12061458	12062160	4	1_1_2	185	0.041	n/a	/n/a	+
1:12359259|12364785	1	12359259	12364785	11	4_4_2	41	0.349	n/a	/n/a	+
1:12359259|12368698	1	12359259	12368698	20	5_7_0	32	0.556	n/a	/n/a	+
1:12359259|12371982	1	12359259	12371982	13	4_3_1	10	0.722	n/a	/n/a	+
1:12368488|12374384	1	12368488	12374384	2	1_2_0	47	0.078	n/a	/n/a	+
1:12460238|12476880	1	12460238	12476880	14	5_4_1	39	0.418	n/a	/n/a	+
1:12475140|12476880	1	12475140	12476880	20	4_4_0	36	0.526	n/a	/n/a	+
1:12638746|12639440	1	12638746	12639440	258	44_41_11	486	0.515	n/a	/n/a	-
1:12638746|12640694	1	12638746	12640694	18	5_8_1	798	0.043	n/a	/n/a	-
1:15844605|15844890	1	15844605	15844890	4	1_1_1	142	0.053	n/a	/n/a	-
1:15860732|15874923	1	15860732	15874923	7	0_3_3	8	0.636	n/a	/n/a	+
1:15956820|15964929	1	15956820	15964929	2	1_1_1	32	0.111	n/a	/n/a	+
1:15964802|15970145	1	15964802	15970145	25	8_6_1	19	0.725	n/a	/n/a	+
1:15970017|15976318	1	15970017	15976318	4	2_2_0	59	0.119	n/a	/n/a	+
1:15973332|15976318	1	15973332	15976318	9	3_2_1	38	0.321	n/a	/n/a	+
1:16044388|16047883	1	16044388	16047883	21	5_4_7	48	0.467	n/a	/n/a	+
1:16116601|16123438	1	16116601	16123438	20	6_2_3	49	0.449	n/a	/n/a	-
1:16119332|16123438	1	16119332	16123438	23	6_1_7	105	0.305	n/a	/n/a	-
1:16235816|16237796	1	16235816	16237796	3	2_2_0	18	0.25	n/a	/n/a	+
1:16237596|16242774	1	16237596	16242774	4	1_2_0	8	0.5	n/a	/n/a	+
1:16242623|16248844	1	16242623	16248844	4	1_2_0	27	0.229	n/a	/n/a	+
1:16464348|16464925	1	16464348	16464925	5	1_2_0	74	0.119	n/a	/n/a	-
1:16490966|16494748	1	16490966	16494748	11	5_4_1	8	0.733	n/a	/n/a	+
1:16528277|16529069	1	16528277	16529069	7	1_2_1	36	0.28	n/a	/n/a	-
1:17349103|17350569	1	17349103	17350569	8	2_3_0	159	0.091	n/a	/n/a	-
1:19513034|19514034	1	19513034	19514034	10	4_1_3	57	0.26	n/a	/n/a	-
1:19518682|19519034	1	19518682	19519034	4	2_1_3	29	0.216	n/a	/n/a	-
1:19519927|19523759	1	19519927	19523759	7	2_2_0	54	0.206	n/a	/n/a	-
1:19644094|19644335	1	19644094	19644335	3	2_2_0	27	0.182	n/a	/n/a	+
1:19705034|19712120	1	19705034	19712120	3	2_2_0	176	0.033	n/a	/n/a	-
1:20097035|20113610	1	20097035	20113610	8	0_1_2	15	0.516	n/a	/n/a	-
1:20107073|20113610	1	20107073	20113610	12	3_3_0	11	0.686	n/a	/n/a	-
1:20936146|20940392	1	20936146	20940392	2	1_0_2	101	0.038	n/a	/n/a	+
1:20972053|20972473	1	20972053	20972473	4	2_1_0	132	0.057	n/a	/n/a	+
1:21076216|21076468	1	21076216	21076468	20	7_4_2	53	0.43	n/a	/n/a	-
1:21076216|21100103	1	21076216	21100103	92	23_22_4	148	0.554	n/a	/n/a	-
1:21083659|21094157	1	21083659	21094157	6	1_1_1	360	0.032	n/a	/n/a	-
1:21083659|21100095	1	21083659	21100095	4	1_0_2	301	0.026	n/a	/n/a	-
1:21083659|21100103	1	21083659	21100103	149	17_31_16	258	0.536	n/a	/n/a	-
1:21091870|21100103	1	21091870	21100103	72	19_17_4	516	0.218	n/a	/n/a	-
1:21097423|21100103	1	21097423	21100103	145	30_31_6	329	0.468	n/a	/n/a	-
1:21102217|21102498	1	21102217	21102498	27	10_11_2	65	0.454	n/a	/n/a	-
1:21205816|21212864	1	21205816	21212864	9	3_3_0	34	0.346	n/a	/n/a	-
1:21220010|21221994	1	21220010	21221994	29	7_5_1	67	0.464	n/a	/n/a	-
1:21327692|21329301	1	21327692	21329301	79	20_16_11	71	0.69	n/a	/n/a	-
1:21329206|21377487	1	21329206	21377487	15	2_2_6	168	0.152	n/a	/n/a	-
1:21329206|21415706	1	21329206	21415706	11	3_1_3	217	0.092	n/a	/n/a	-
1:21329206|21437876	1	21329206	21437876	7	1_0_2	107	0.116	n/a	/n/a	-
1:21373452|21377487	1	21373452	21377487	8	1_2_3	78	0.17	n/a	/n/a	-
1:21377359|21415706	1	21377359	21415706	34	7_4_4	189	0.265	n/a	/n/a	-
1:21377359|21437876	1	21377359	21437876	30	9_4_7	79	0.432	n/a	/n/a	-
1:21377359|21463270	1	21377359	21463270	3	0_2_2	78	0.071	n/a	/n/a	-
1:21386218|21415706	1	21386218	21415706	3	1_1_2	127	0.045	n/a	/n/a	-
1:21389092|21415706	1	21389092	21415706	8	3_2_0	121	0.117	n/a	/n/a	-
1:21399345|21415706	1	21399345	21415706	3	1_1_2	129	0.044	n/a	/n/a	-
1:21399956|21437876	1	21399956	21437876	13	3_2_0	11	0.703	n/a	/n/a	-
1:21415631|21421487	1	21415631	21421487	5	1_0_2	98	0.093	n/a	/n/a	-
1:21415631|21437876	1	21415631	21437876	158	12_6_34	105	0.751	n/a	/n/a	-
1:21415631|21464301	1	21415631	21464301	6	0_2_2	108	0.1	n/a	/n/a	-
1:21431610|21437876	1	21431610	21437876	10	3_1_0	54	0.27	n/a	/n/a	-
1:21573714|21582631	1	21573714	21582631	4	2_2_0	42	0.16	n/a	/n/a	-
1:21599192|21616649	1	21599192	21616649	21	4_1_4	52	0.447	n/a	/n/a	-
1:21799336|21800078	1	21799336	21800078	4	1_2_1	17	0.32	n/a	/n/a	+
1:22047529|22048257	1	22047529	22048257	12	2_2_0	4	0.857	n/a	/n/a	-
1:22073560|22074764	1	22073560	22074764	16	1_3_1	24	0.571	n/a	/n/a	-
1:22073560|22079612	1	22073560	22079612	6	2_3_1	21	0.364	n/a	/n/a	-
1:22074631|22078108	1	22074631	22078108	20	7_5_4	42	0.488	n/a	/n/a	-
1:22074631|22079612	1	22074631	22079612	13	2_4_1	36	0.419	n/a	/n/a	-
1:22404922|22413359	1	22404922	22413359	321	35_44_7	27	0.96	n/a	/n/a	+
1:22404922|22417994	1	22404922	22417994	6	3_1_1	43	0.218	n/a	/n/a	+
1:22404922|22420629	1	22404922	22420629	5	1_1_1	16	0.385	n/a	/n/a	+
1:23356936|23377013	1	23356936	23377013	42	10_8_2	134	0.385	n/a	/n/a	+
1:23356962|23366927	1	23356962	23366927	24	8_7_0	111	0.302	n/a	/n/a	+
1:23356962|23370979	1	23356962	23370979	40	6_2_7	270	0.229	n/a	/n/a	+
1:23356962|23377013	1	23356962	23377013	673	63_62_38	166	0.89	n/a	/n/a	+
1:23356962|23385660	1	23356962	23385660	6	2_1_1	61	0.164	n/a	/n/a	+
1:23366752|23370979	1	23366752	23370979	17	6_1_4	257	0.117	n/a	/n/a	+
1:23366752|23377013	1	23366752	23377013	3	2_2_0	159	0.036	n/a	/n/a	+
1:23370920|23377013	1	23370920	23377013	9	1_2_3	361	0.047	n/a	/n/a	+
1:23376880|23384058	1	23376880	23384058	8	1_1_1	742	0.021	n/a	/n/a	+
1:23376880|23385660	1	23376880	23385660	45	14_9_3	694	0.115	n/a	/n/a	+
1:23381562|23384058	1	23381562	23384058	16	1_2_3	125	0.204	n/a	/n/a	+
1:23381562|23395644	1	23381562	23395644	4	2_0_2	77	0.094	n/a	/n/a	+
1:23397718|23398690	1	23397718	23398690	78	19_8_19	60	0.722	n/a	/n/a	+
1:24075511|24076438	1	24075511	24076438	7	1_2_2	48	0.226	n/a	/n/a	+
1:24112165|24112913	1	24112165	24112913	29	5_7_1	334	0.148	n/a	/n/a	+
1:24140680|24147083	1	24140680	24147083	29	8_4_5	80	0.42	n/a	/n/a	-
1:24143165|24147083	1	24143165	24147083	40	7_3_7	126	0.388	n/a	/n/a	-
1:24495907|24507344	1	24495907	24507344	4	1_2_0	8	0.5	n/a	/n/a	-
1:24840804|24841057	1	24840804	24841057	21	7_7_0	1	0.977	n/a	/n/a	+
1:24857708|24859744	1	24857708	24859744	8	3_2_1	1	0.941	n/a	/n/a	+
1:24973158|24975520	1	24973158	24975520	2	1_2_1	3	0.571	n/a	/n/a	+
1:24985054|24987887	1	24985054	24987887	9	1_0_3	2	0.9	n/a	/n/a	+
1:25124233|25153607	1	25124233	25153607	5	2_2_1	44	0.185	n/a	/n/a	+
1:25666965|25678184	1	25666965	25678184	17	3_2_7	33	0.507	n/a	/n/a	+
1:26508971|26510632	1	26508971	26510632	3	0_2_2	35	0.146	n/a	/n/a	+
1:26581662|26582356	1	26581662	26582356	28	9_10_2	19	0.747	n/a	/n/a	+
1:26584088|26586293	1	26584088	26586293	38	10_13_3	17	0.817	n/a	/n/a	+
1:26594974|26596105	1	26594974	26596105	6	2_2_0	12	0.5	n/a	/n/a	+
1:26772807|26774151	1	26772807	26774151	20	6_6_2	52	0.435	n/a	/n/a	+
1:26772807|26786635	1	26772807	26786635	17	2_2_3	54	0.386	n/a	/n/a	+
1:26784282|26786635	1	26784282	26786635	9	1_2_1	44	0.29	n/a	/n/a	+
1:27056142|27059283	1	27056142	27059283	28	5_7_1	34	0.622	n/a	/n/a	+
1:27223792|27224216	1	27223792	27224216	7	2_2_0	34	0.292	n/a	/n/a	-
1:27269151|27269556	1	27269151	27269556	8	1_2_3	12	0.571	n/a	/n/a	+
1:28116073|28120143	1	28116073	28120143	13	2_4_3	21	0.553	n/a	/n/a	+
1:28218574|28224218	1	28218574	28224218	4	3_1_1	176	0.043	n/a	/n/a	-
1:28337458|28339805	1	28337458	28339805	3	1_2_0	24	0.2	n/a	/n/a	-
1:28337458|28343750	1	28337458	28343750	9	3_1_2	0	1	n/a	/n/a	-
1:28362055|28374937	1	28362055	28374937	14	4_1_3	2	0.933	n/a	/n/a	-
1:28601336|28605752	1	28601336	28605752	74	18_18_4	461	0.243	n/a	/n/a	+
1:28733921|28734646	1	28733921	28734646	18	5_6_2	13	0.735	n/a	/n/a	+
1:28733921|28735550	1	28733921	28735550	7	1_3_2	13	0.519	n/a	/n/a	+
1:28893806|28898412	1	28893806	28898412	4	2_0_1	58	0.121	n/a	/n/a	+
1:28907072|28907741	1	28907072	28907741	17	2_4_3	27	0.557	n/a	/n/a	-
1:29359605|29365938	1	29359605	29365938	5	1_2_1	17	0.37	n/a	/n/a	+
1:29362338|29365938	1	29362338	29365938	16	4_6_1	23	0.582	n/a	/n/a	+
1:29481208|29481422	1	29481208	29481422	136	27_28_4	45	0.858	n/a	/n/a	-
1:29609188|29611381	1	29609188	29611381	9	2_1_0	74	0.196	n/a	/n/a	+
1:31409490|31414119	1	31409490	31414119	5	2_2_0	114	0.081	n/a	/n/a	-
1:31413998|31414970	1	31413998	31414970	7	1_1_2	82	0.146	n/a	/n/a	-
1:31438829|31441339	1	31438829	31441339	3	2_1_0	39	0.133	n/a	/n/a	-
1:31465237|31468067	1	31465237	31468067	50	14_10_2	137	0.422	n/a	/n/a	-
1:31465237|31479949	1	31465237	31479949	28	4_4_3	97	0.366	n/a	/n/a	-
1:31478700|31479946	1	31478700	31479946	10	5_5_1	114	0.149	n/a	/n/a	-
1:31478700|31479949	1	31478700	31479949	218	36_25_14	113	0.794	n/a	/n/a	-
1:31478700|31501711	1	31478700	31501711	11	2_1_3	111	0.165	n/a	/n/a	-
1:31532051|31532424	1	31532051	31532424	3	2_2_0	56	0.097	n/a	/n/a	-
1:31782891|31792013	1	31782891	31792013	2	2_0_2	13	0.235	n/a	/n/a	+
1:31810022|31821821	1	31810022	31821821	7	2_1_1	22	0.389	n/a	/n/a	+
1:32381492|32385259	1	32381492	32385259	15	5_4_1	26	0.536	n/a	/n/a	-
1:32381496|32385259	1	32381496	32385259	239	16_38_16	26	0.948	n/a	/n/a	-
1:32384571|32385259	1	32384571	32385259	5	3_2_0	48	0.172	n/a	/n/a	-
1:32495899|32498935	1	32495899	32498935	15	4_1_0	277	0.098	n/a	/n/a	+
1:32502511|32504220	1	32502511	32504220	31	8_4_7	313	0.165	n/a	/n/a	+
1:32502511|32505174	1	32502511	32505174	15	3_0_3	326	0.084	n/a	/n/a	+
1:32503436|32504220	1	32503436	32504220	3	2_1_1	119	0.048	n/a	/n/a	+
1:32650126|32653725	1	32650126	32653725	5	0_1_3	59	0.145	n/a	/n/a	+
1:32689635|32690076	1	32689635	32690076	6	2_2_0	236	0.048	n/a	/n/a	+
1:32691772|32692131	1	32691772	32692131	9	3_2_0	394	0.044	n/a	/n/a	+
1:32694100|32694809	1	32694100	32694809	3	1_1_2	245	0.024	n/a	/n/a	+
1:32697345|32697785	1	32697345	32697785	6	2_3_0	7	0.632	n/a	/n/a	-
1:32792540|32793278	1	32792540	32793278	16	2_2_0	34	0.485	n/a	/n/a	+
1:33019060|33023566	1	33019060	33023566	6	0_2_1	12	0.5	n/a	/n/a	+
1:33058532|33060824	1	33058532	33060824	12	2_2_0	18	0.571	n/a	/n/a	+
1:33097428|33099711	1	33097428	33099711	15	0_4_3	34	0.469	n/a	/n/a	-
1:33099246|33099711	1	33099246	33099711	16	1_5_2	40	0.444	n/a	/n/a	-
1:33133826|33138502	1	33133826	33138502	4	2_2_0	20	0.286	n/a	/n/a	+
1:33251963|33256855	1	33251963	33256855	5	2_2_1	301	0.032	n/a	/n/a	-
1:33272083|33276658	1	33272083	33276658	8	1_2_0	207	0.072	n/a	/n/a	-
1:33276192|33276658	1	33276192	33276658	15	5_3_1	378	0.074	n/a	/n/a	-
1:33413823|33415375	1	33413823	33415375	64	13_17_2	38	0.771	n/a	/n/a	-
1:33760538|33760906	1	33760538	33760906	38	7_13_9	70	0.521	n/a	/n/a	+
1:35470733|35474525	1	35470733	35474525	4	2_1_0	4	0.667	n/a	/n/a	-
1:35480298|35480763	1	35480298	35480763	2	1_1_1	9	0.308	n/a	/n/a	-
1:35569896|35570370	1	35569896	35570370	21	5_5_1	2	0.955	n/a	/n/a	+
1:35652804|35654688	1	35652804	35654688	2	0_1_2	32	0.111	n/a	/n/a	-
1:35758627|35761589	1	35758627	35761589	10	3_0_4	18	0.526	n/a	/n/a	+
1:35824526|35827390	1	35824526	35827390	4	2_1_1	12	0.4	n/a	/n/a	+
1:35846860|35847359	1	35846860	35847359	7	2_2_0	10	0.583	n/a	/n/a	+
1:35846860|35854683	1	35846860	35854683	15	4_4_0	23	0.566	n/a	/n/a	+
1:35870624|35871069	1	35870624	35871069	9	4_1_1	21	0.462	n/a	/n/a	+
1:35870624|35873760	1	35870624	35873760	4	2_2_0	26	0.235	n/a	/n/a	+
1:35879573|35881315	1	35879573	35881315	55	15_17_3	18	0.859	n/a	/n/a	+
1:35881067|35881315	1	35881067	35881315	16	7_9_1	97	0.248	n/a	/n/a	+
1:35932209|35944813	1	35932209	35944813	4	1_1_1	39	0.17	n/a	/n/a	-
1:35936464|35944813	1	35936464	35944813	10	3_0_3	32	0.385	n/a	/n/a	-
1:35944567|35944813	1	35944567	35944813	38	7_9_1	46	0.623	n/a	/n/a	-
1:36213508|36214205	1	36213508	36214205	32	10_10_3	20	0.762	n/a	/n/a	-
1:36299591|36301594	1	36299591	36301594	5	1_3_1	9	0.526	n/a	/n/a	+
1:36367075|36367938	1	36367075	36367938	5	2_2_1	51	0.164	n/a	/n/a	+
1:36432556|36439112	1	36432556	36439112	18	6_6_1	25	0.59	n/a	/n/a	+
1:36437625|36439112	1	36437625	36439112	12	3_4_1	40	0.375	n/a	/n/a	+
1:36437625|36450149	1	36437625	36450149	4	3_1_2	26	0.235	n/a	/n/a	+
1:36814371|36823872	1	36814371	36823872	28	1_1_10	64	0.467	n/a	/n/a	-
1:36823840|36824423	1	36823840	36824423	7	2_1_2	40	0.259	n/a	/n/a	-
1:36826822|36828257	1	36826822	36828257	21	3_1_7	33	0.56	n/a	/n/a	-
1:38047824|38053096	1	38047824	38053096	8	4_3_0	40	0.286	n/a	/n/a	-
1:38049468|38053096	1	38049468	38053096	5	0_1_2	40	0.2	n/a	/n/a	-
1:38052912|38054683	1	38052912	38054683	24	9_7_1	19	0.716	n/a	/n/a	-
1:38300751|38304428	1	38300751	38304428	5	3_2_0	26	0.278	n/a	/n/a	-
1:38329984|38334286	1	38329984	38334286	9	1_1_1	55	0.247	n/a	/n/a	-
1:38332131|38339760	1	38332131	38339760	25	4_4_2	38	0.568	n/a	/n/a	-
1:38338602|38339827	1	38338602	38339827	10	2_2_0	62	0.244	n/a	/n/a	-
1:38341278|38344164	1	38341278	38344164	6	2_2_0	60	0.167	n/a	/n/a	-
1:38449841|38450451	1	38449841	38450451	4	1_2_0	0	1	n/a	/n/a	-
1:39696854|39723700	1	39696854	39723700	12	1_2_5	13	0.649	n/a	/n/a	+
1:39775242|39776672	1	39775242	39776672	5	2_2_0	6	0.625	n/a	/n/a	+
1:39806174|39806625	1	39806174	39806625	4	1_2_0	0	1	n/a	/n/a	+
1:40319642|40323089	1	40319642	40323089	6	1_2_1	23	0.343	n/a	/n/a	-
1:40654727|40661436	1	40654727	40661436	5	2_3_0	165	0.057	n/a	/n/a	+
1:40654727|40668286	1	40654727	40668286	117	23_24_3	10	0.959	n/a	/n/a	+
1:40656444|40668286	1	40656444	40668286	36	8_12_8	115	0.385	n/a	/n/a	+
1:40667600|40668286	1	40667600	40668286	7	0_2_2	25	0.359	n/a	/n/a	+
1:40726511|40737707	1	40726511	40737707	3	2_1_0	28	0.176	n/a	/n/a	+
1:40733458|40737707	1	40733458	40737707	8	1_1_2	46	0.258	n/a	/n/a	+
1:41463066|41466789	1	41463066	41466789	6	3_3_0	233	0.049	n/a	/n/a	+
1:41466701|41467926	1	41466701	41467926	7	1_1_2	388	0.035	n/a	/n/a	+
1:41474466|41475261	1	41474466	41475261	70	12_13_3	380	0.269	n/a	/n/a	+
1:41474466|41475926	1	41474466	41475926	72	13_11_12	263	0.354	n/a	/n/a	+
1:41512079|41514562	1	41512079	41514562	10	2_2_0	23	0.465	n/a	/n/a	-
1:41536267|41537645	1	41536267	41537645	5	3_3_0	17	0.37	n/a	/n/a	-
1:41536267|41541123	1	41536267	41541123	39	10_13_1	22	0.78	n/a	/n/a	-
1:41571414|41627104	1	41571414	41627104	3	1_0_2	9	0.4	n/a	/n/a	-
1:41578955|41582682	1	41578955	41582682	19	6_1_6	63	0.376	n/a	/n/a	-
1:41578955|41608784	1	41578955	41608784	87	16_17_2	88	0.664	n/a	/n/a	-
1:41578955|41627104	1	41578955	41627104	14	4_1_3	45	0.384	n/a	/n/a	-
1:41578955|41651922	1	41578955	41651922	6	2_2_0	60	0.167	n/a	/n/a	-
1:41651793|41660071	1	41651793	41660071	16	5_2_1	9	0.78	n/a	/n/a	-
1:42094420|42094618	1	42094420	42094618	14	2_2_2	4	0.875	n/a	/n/a	-
1:42094420|42111914	1	42094420	42111914	7	2_2_0	6	0.7	n/a	/n/a	-
1:42330249|42335301	1	42330249	42335301	2	2_0_1	12	0.25	n/a	/n/a	-
1:42693554|42744343	1	42693554	42744343	20	5_8_4	413	0.088	n/a	/n/a	-
1:42693554|42744455	1	42693554	42744455	7	2_3_1	39	0.264	n/a	/n/a	-
1:42693554|42776781	1	42693554	42776781	25	4_2_8	57	0.467	n/a	/n/a	-
1:42693554|42789498	1	42693554	42789498	6	0_2_1	29	0.293	n/a	/n/a	-
1:42730786|42744343	1	42730786	42744343	242	17_37_26	486	0.499	n/a	/n/a	-
1:42730786|42744455	1	42730786	42744455	80	6_21_10	120	0.571	n/a	/n/a	-
1:42730786|42776781	1	42730786	42776781	103	9_5_29	138	0.599	n/a	/n/a	-
1:42730786|42789498	1	42730786	42789498	19	3_4_3	110	0.257	n/a	/n/a	-
1:42744019|42744343	1	42744019	42744343	27	7_7_1	546	0.09	n/a	/n/a	-
1:42744019|42776781	1	42744019	42776781	13	5_3_3	234	0.1	n/a	/n/a	-
1:43130534|43133111	1	43130534	43133111	6	3_2_2	19	0.387	n/a	/n/a	+
1:43239234|43241150	1	43239234	43241150	75	8_13_2	12	0.926	n/a	/n/a	+
1:43239234|43241193	1	43239234	43241193	4	1_2_0	4	0.667	n/a	/n/a	+
1:43850717|43853318	1	43850717	43853318	3	0_2_2	62	0.088	n/a	/n/a	-
1:44019163|44035449	1	44019163	44035449	10	2_2_0	271	0.069	n/a	/n/a	+
1:44201904|44303983	1	44201904	44303983	9	1_1_1	27	0.4	n/a	/n/a	+
1:44257773|44303983	1	44257773	44303983	4	0_2_2	41	0.163	n/a	/n/a	+
1:44290403|44303983	1	44290403	44303983	4	2_1_0	23	0.258	n/a	/n/a	+
1:44360055|44365399	1	44360055	44365399	5	1_2_1	24	0.294	n/a	/n/a	+
1:44386076|44386600	1	44386076	44386600	11	3_1_0	30	0.423	n/a	/n/a	+
1:44707587|44713710	1	44707587	44713710	7	2_1_1	481	0.028	n/a	/n/a	-
1:44713611|44785416	1	44713611	44785416	28	6_5_4	978	0.054	n/a	/n/a	-
1:44713611|44804994	1	44713611	44804994	10	4_2_0	509	0.038	n/a	/n/a	-
1:44713611|44818597	1	44713611	44818597	10	0_1_2	473	0.041	n/a	/n/a	-
1:44750507|44785416	1	44750507	44785416	104	7_17_19	889	0.19	n/a	/n/a	-
1:44750507|44804994	1	44750507	44804994	44	3_11_9	420	0.173	n/a	/n/a	-
1:44773982|44785416	1	44773982	44785416	312	28_34_30	845	0.425	n/a	/n/a	-
1:44773982|44804994	1	44773982	44804994	63	10_19_10	388	0.245	n/a	/n/a	-
1:44773982|44818597	1	44773982	44818597	15	3_3_4	352	0.079	n/a	/n/a	-
1:44785300|44804994	1	44785300	44804994	33	9_7_3	925	0.067	n/a	/n/a	-
1:44785300|44818597	1	44785300	44818597	11	3_3_2	885	0.024	n/a	/n/a	-
1:44804717|44804994	1	44804717	44804994	12	5_5_0	465	0.049	n/a	/n/a	-
1:44877653|44878394	1	44877653	44878394	289	48_45_12	57	0.91	n/a	/n/a	+
1:44877653|44881895	1	44877653	44881895	11	4_3_1	35	0.386	n/a	/n/a	+
1:45166595|45169845	1	45166595	45169845	8	1_1_1	8	0.667	n/a	/n/a	+
1:45223228|45223812	1	45223228	45223812	77	12_10_18	61	0.716	n/a	/n/a	+
1:45241706|45244389	1	45241706	45244389	8	2_2_0	92	0.148	n/a	/n/a	+
1:45340350|45347411	1	45340350	45347411	2	1_2_0	18	0.182	n/a	/n/a	-
1:45553553|45553909	1	45553553	45553909	36	7_9_0	6	0.923	n/a	/n/a	-
1:46032241|46032692	1	46032241	46032692	30	4_9_2	397	0.131	n/a	/n/a	+
1:46066057|46068037	1	46066057	46068037	5	1_0_2	27	0.27	n/a	/n/a	+
1:46093932|46106075	1	46093932	46106075	7	3_1_0	79	0.151	n/a	/n/a	-
1:46096154|46106075	1	46096154	46106075	6	1_2_0	85	0.124	n/a	/n/a	-
1:46099161|46108171	1	46099161	46108171	15	7_4_2	175	0.146	n/a	/n/a	-
1:46105882|46108171	1	46105882	46108171	25	9_3_7	105	0.323	n/a	/n/a	-
1:46105882|46120991	1	46105882	46120991	8	4_2_1	61	0.208	n/a	/n/a	-
1:46108099|46124814	1	46108099	46124814	4	1_2_1	135	0.056	n/a	/n/a	-
1:46120215|46124814	1	46120215	46124814	7	2_2_0	139	0.092	n/a	/n/a	-
1:46193303|46195441	1	46193303	46195441	6	2_2_0	30	0.286	n/a	/n/a	-
1:46290105|46295253	1	46290105	46295253	13	1_5_0	51	0.338	n/a	/n/a	+
1:46521467|46546422	1	46521467	46546422	11	3_0_1	33	0.4	n/a	/n/a	-
1:46531726|46546422	1	46531726	46546422	7	1_2_1	46	0.233	n/a	/n/a	-
1:46543187|46546422	1	46543187	46546422	46	8_6_8	51	0.643	n/a	/n/a	-
1:47728575|47737913	1	47728575	47737913	7	3_3_0	11	0.56	n/a	/n/a	-
1:47735307|47737913	1	47735307	47737913	7	2_2_0	25	0.359	n/a	/n/a	-
1:47745913|47748131	1	47745913	47748131	10	2_2_1	8	0.714	n/a	/n/a	-
1:47753223|47761520	1	47753223	47761520	11	2_1_4	41	0.349	n/a	/n/a	-
1:47753223|47765824	1	47753223	47765824	11	3_1_3	36	0.379	n/a	/n/a	-
1:47755107|47767420	1	47755107	47767420	5	2_2_0	48	0.172	n/a	/n/a	-
1:47761437|47767420	1	47761437	47767420	64	7_8_13	46	0.736	n/a	/n/a	-
1:47761437|47770668	1	47761437	47770668	6	2_2_1	69	0.148	n/a	/n/a	-
1:47767233|47776034	1	47767233	47776034	7	2_0_1	47	0.23	n/a	/n/a	-
1:47834141|47838779	1	47834141	47838779	14	3_3_0	69	0.289	n/a	/n/a	+
1:47834141|47840965	1	47834141	47840965	12	1_1_3	27	0.471	n/a	/n/a	+
1:48244126|48260432	1	48244126	48260432	3	0_1_2	2	0.75	n/a	/n/a	-
1:48821342|48825442	1	48821342	48825442	13	4_4_1	4	0.867	n/a	/n/a	-
1:48877136|48918803	1	48877136	48918803	4	1_1_1	0	1	n/a	/n/a	-
1:51001041|51032903	1	51001041	51032903	14	2_5_2	309	0.083	n/a	/n/a	-
1:51001041|51061888	1	51001041	51061888	17	4_3_4	244	0.122	n/a	/n/a	-
1:51005264|51061888	1	51005264	51061888	25	9_8_2	286	0.149	n/a	/n/a	-
1:51032749|51050483	1	51032749	51050483	15	5_3_0	340	0.081	n/a	/n/a	-
1:51032749|51061888	1	51032749	51061888	160	32_23_14	226	0.586	n/a	/n/a	-
1:51048290|51061888	1	51048290	51061888	22	4_7_3	298	0.129	n/a	/n/a	-
1:51121114|51171563	1	51121114	51171563	3	0_1_2	206	0.028	n/a	/n/a	-
1:51121114|51210447	1	51121114	51210447	21	5_3_2	198	0.175	n/a	/n/a	-
1:51171458|51210447	1	51171458	51210447	15	5_1_6	252	0.106	n/a	/n/a	-
1:51171458|51212645	1	51171458	51212645	9	1_2_2	114	0.136	n/a	/n/a	-
1:51171458|51246716	1	51171458	51246716	12	4_3_2	151	0.137	n/a	/n/a	-
1:51171458|51323669	1	51171458	51323669	3	2_1_1	118	0.048	n/a	/n/a	-
1:51199865|51210447	1	51199865	51210447	2	0_1_2	183	0.021	n/a	/n/a	-
1:51204535|51210447	1	51204535	51210447	8	2_0_4	307	0.05	n/a	/n/a	-
1:51204535|51218195	1	51204535	51218195	14	4_3_3	175	0.138	n/a	/n/a	-
1:51204535|51267349	1	51204535	51267349	10	3_0_2	233	0.079	n/a	/n/a	-
1:51204535|51323669	1	51204535	51323669	7	1_0_3	179	0.073	n/a	/n/a	-
1:51210356|51267349	1	51210356	51267349	3	2_0_2	313	0.019	n/a	/n/a	-
1:51246529|51267349	1	51246529	51267349	8	4_0_4	100	0.138	n/a	/n/a	-
1:51246529|51320089	1	51246529	51320089	4	2_1_0	55	0.127	n/a	/n/a	-
1:51246529|51323669	1	51246529	51323669	3	2_0_3	47	0.113	n/a	/n/a	-
1:51253672|51267349	1	51253672	51267349	92	17_6_12	197	0.483	n/a	/n/a	-
1:51253672|51323669	1	51253672	51323669	45	8_5_6	155	0.367	n/a	/n/a	-
1:51317874|51323669	1	51317874	51323669	11	1_1_3	13	0.629	n/a	/n/a	-
1:51702406|51735797	1	51702406	51735797	11	2_2_0	38	0.367	n/a	/n/a	+
1:51860053|51866625	1	51860053	51866625	9	2_0_2	0	1	n/a	/n/a	-
1:51868107|51874004	1	51868107	51874004	168	18_32_15	33	0.911	n/a	/n/a	-
1:51871577|51874004	1	51871577	51874004	9	1_3_1	73	0.198	n/a	/n/a	-
1:51887458|51913807	1	51887458	51913807	6	1_2_2	34	0.261	n/a	/n/a	-
1:51906019|51913807	1	51906019	51913807	17	4_3_3	39	0.466	n/a	/n/a	-
1:51926763|51930998	1	51926763	51930998	61	2_8_19	40	0.753	n/a	/n/a	-
1:51926763|51946986	1	51926763	51946986	6	0_1_3	24	0.333	n/a	/n/a	-
1:52026554|52026893	1	52026554	52026893	2	1_1_2	0	1	n/a	/n/a	+
1:52082546|52117713	1	52082546	52117713	5	1_0_2	4	0.714	n/a	/n/a	+
1:52211208|52231653	1	52211208	52231653	47	7_11_7	92	0.505	n/a	/n/a	+
1:52211208|52238395	1	52211208	52238395	8	0_1_2	25	0.39	n/a	/n/a	+
1:52212382|52231653	1	52212382	52231653	6	0_2_1	68	0.15	n/a	/n/a	+
1:52214041|52231653	1	52214041	52231653	5	0_2_1	69	0.127	n/a	/n/a	+
1:52215817|52227643	1	52215817	52227643	14	1_4_4	57	0.329	n/a	/n/a	+
1:52215817|52231653	1	52215817	52231653	7	0_2_3	104	0.119	n/a	/n/a	+
1:52215817|52237854	1	52215817	52237854	7	0_1_2	81	0.147	n/a	/n/a	+
1:52237742|52238395	1	52237742	52238395	11	2_3_2	63	0.259	n/a	/n/a	+
1:52285472|52299842	1	52285472	52299842	6	1_2_0	63	0.16	n/a	/n/a	-
1:52289336|52299842	1	52289336	52299842	26	7_6_1	66	0.441	n/a	/n/a	-
1:52293468|52299842	1	52293468	52299842	79	8_20_13	65	0.709	n/a	/n/a	-
1:52759125|52769597	1	52759125	52769597	9	2_1_0	18	0.5	n/a	/n/a	+
1:52924008|52927441	1	52924008	52927441	5	2_1_1	24	0.294	n/a	/n/a	-
1:52924008|52933939	1	52924008	52933939	4	1_0_2	7	0.533	n/a	/n/a	-
1:52926806|52927441	1	52926806	52927441	6	2_0_2	33	0.267	n/a	/n/a	-
1:52947476|52975384	1	52947476	52975384	3	1_1_1	100	0.057	n/a	/n/a	-
1:52954581|52959334	1	52954581	52959334	3	3_0_2	285	0.021	n/a	/n/a	-
1:52954581|52962855	1	52954581	52962855	3	1_1_1	304	0.019	n/a	/n/a	-
1:52954581|52975384	1	52954581	52975384	8	4_4_0	93	0.147	n/a	/n/a	-
1:52956404|52975384	1	52956404	52975384	16	4_5_7	82	0.281	n/a	/n/a	-
1:52959283|52962855	1	52959283	52962855	29	1_10_9	419	0.122	n/a	/n/a	-
1:52959283|52975384	1	52959283	52975384	945	15_53_93	227	0.893	n/a	/n/a	-
1:53322670|53326543	1	53322670	53326543	14	4_4_0	48	0.368	n/a	/n/a	+
1:53326403|53333449	1	53326403	53333449	10	4_0_4	22	0.476	n/a	/n/a	+
1:53332175|53343515	1	53332175	53343515	2	1_2_1	73	0.052	n/a	/n/a	+
1:53332213|53358647	1	53332213	53358647	2	0_2_2	61	0.062	n/a	/n/a	+
1:53343354|53347337	1	53343354	53347337	13	3_2_0	85	0.234	n/a	/n/a	+
1:53343354|53352725	1	53343354	53352725	4	2_3_0	99	0.075	n/a	/n/a	+
1:53343354|53358647	1	53343354	53358647	19	6_6_0	49	0.437	n/a	/n/a	+
1:53351505|53358647	1	53351505	53358647	17	3_8_3	96	0.262	n/a	/n/a	+
1:53352628|53358647	1	53352628	53358647	8	0_2_3	104	0.133	n/a	/n/a	+
1:53407468|53427301	1	53407468	53427301	6	1_2_1	26	0.316	n/a	/n/a	+
1:53440441|53453808	1	53440441	53453808	5	1_1_1	37	0.213	n/a	/n/a	+
1:53459075|53459374	1	53459075	53459374	99	16_21_2	116	0.631	n/a	/n/a	-
1:53736700|53737018	1	53736700	53737018	10	1_2_0	22	0.476	n/a	/n/a	-
1:54254806|54262817	1	54254806	54262817	11	0_1_4	68	0.244	n/a	/n/a	-
1:54258902|54262817	1	54258902	54262817	8	0_3_2	63	0.203	n/a	/n/a	-
1:54258902|54266521	1	54258902	54266521	13	1_1_2	54	0.325	n/a	/n/a	-
1:54262362|54262817	1	54262362	54262817	17	2_2_0	57	0.374	n/a	/n/a	-
1:54262362|54266521	1	54262362	54266521	8	1_2_2	48	0.25	n/a	/n/a	-
1:54266366|54269682	1	54266366	54269682	8	2_1_0	43	0.271	n/a	/n/a	-
1:54266366|54298264	1	54266366	54298264	6	2_2_0	57	0.174	n/a	/n/a	-
1:54284644|54298264	1	54284644	54298264	3	2_2_2	66	0.083	n/a	/n/a	-
1:54291471|54298264	1	54291471	54298264	8	3_2_1	67	0.193	n/a	/n/a	-
1:54337045|54344395	1	54337045	54344395	7	0_1_2	21	0.4	n/a	/n/a	-
1:54348616|54348949	1	54348616	54348949	4	1_2_1	12	0.4	n/a	/n/a	-
1:54502283|54513045	1	54502283	54513045	6	1_1_1	71	0.145	n/a	/n/a	-
1:54506429|54509198	1	54506429	54509198	11	0_3_5	165	0.118	n/a	/n/a	-
1:54678174|54682017	1	54678174	54682017	9	1_2_1	880	0.02	n/a	/n/a	+
1:54867534|54870603	1	54867534	54870603	7	2_2_0	1	0.933	n/a	/n/a	-
1:55340766|55341720	1	55340766	55341720	9	3_2_1	138	0.115	n/a	/n/a	-
1:55637229|55643805	1	55637229	55643805	8	2_3_0	20	0.444	n/a	/n/a	-
1:56977648|57002784	1	56977648	57002784	20	4_2_1	6	0.87	n/a	/n/a	-
1:57157067|57161832	1	57157067	57161832	8	3_2_0	17	0.485	n/a	/n/a	+
1:58971732|59002413	1	58971732	59002413	48	15_12_1	41	0.701	n/a	/n/a	-
1:59787208|59812070	1	59787208	59812070	12	2_4_0	16	0.6	n/a	/n/a	+
1:59787208|59844509	1	59787208	59844509	8	2_0_2	9	0.64	n/a	/n/a	+
1:59805630|59812070	1	59805630	59812070	46	7_8_9	23	0.8	n/a	/n/a	+
1:59805630|59844509	1	59805630	59844509	10	3_3_2	17	0.541	n/a	/n/a	+
1:61553821|61578015	1	61553821	61578015	7	2_1_1	41	0.255	n/a	/n/a	+
1:61553821|61743257	1	61553821	61743257	8	4_0_3	72	0.182	n/a	/n/a	+
1:61624547|61624827	1	61624547	61624827	5	3_2_0	20	0.333	n/a	/n/a	+
1:61743192|61824946	1	61743192	61824946	73	10_22_9	65	0.692	n/a	/n/a	+
1:61743192|61849037	1	61743192	61849037	17	2_4_6	53	0.391	n/a	/n/a	+
1:61798184|61824946	1	61798184	61824946	29	4_7_7	106	0.354	n/a	/n/a	+
1:61798184|61849037	1	61798184	61849037	6	0_1_2	97	0.11	n/a	/n/a	+
1:61818122|61824946	1	61818122	61824946	3	3_3_0	259	0.023	n/a	/n/a	+
1:62160369|62189444	1	62160369	62189444	12	0_1_2	17	0.585	n/a	/n/a	-
1:62228530|62232145	1	62228530	62232145	5	0_2_1	30	0.25	n/a	/n/a	+
1:62234955|62241006	1	62234955	62241006	5	3_2_0	39	0.204	n/a	/n/a	+
1:62240878|62261230	1	62240878	62261230	6	2_1_0	14	0.462	n/a	/n/a	+
1:62257020|62274202	1	62257020	62274202	5	1_0_2	14	0.417	n/a	/n/a	+
1:62261139|62263100	1	62261139	62263100	8	1_1_1	18	0.471	n/a	/n/a	+
1:62262959|62271196	1	62262959	62271196	8	1_1_2	17	0.485	n/a	/n/a	+
1:62262959|62274202	1	62262959	62274202	7	2_0_2	13	0.519	n/a	/n/a	+
1:62455840|62483619	1	62455840	62483619	4	2_1_0	10	0.444	n/a	/n/a	+
1:62455840|62503721	1	62455840	62503721	10	2_2_3	16	0.556	n/a	/n/a	+
1:62479015|62483619	1	62479015	62483619	10	5_3_2	13	0.606	n/a	/n/a	+
1:62713144|62718881	1	62713144	62718881	10	2_2_0	27	0.426	n/a	/n/a	-
1:62907159|62907970	1	62907159	62907970	6	2_2_0	28	0.3	n/a	/n/a	+
1:62993822|63009416	1	62993822	63009416	8	1_1_1	5	0.762	n/a	/n/a	-
1:63042933|63052295	1	63042933	63052295	47	6_7_8	33	0.74	n/a	/n/a	-
1:63084377|63091072	1	63084377	63091072	5	1_3_1	15	0.4	n/a	/n/a	-
1:63119396|63128801	1	63119396	63128801	11	2_0_4	4	0.846	n/a	/n/a	-
1:63269390|63270926	1	63269390	63270926	7	1_2_1	5	0.737	n/a	/n/a	+
1:63269390|63276257	1	63269390	63276257	9	3_3_0	0	1	n/a	/n/a	+
1:63877597|63885111	1	63877597	63885111	3	2_1_1	6	0.5	n/a	/n/a	+
1:63944435|63955889	1	63944435	63955889	31	6_8_2	54	0.534	n/a	/n/a	-
1:63944435|63974241	1	63944435	63974241	30	3_0_8	48	0.556	n/a	/n/a	-
1:64235884|64238445	1	64235884	64238445	12	1_2_0	0	1	n/a	/n/a	+
1:65234339|65255197	1	65234339	65255197	2	1_2_1	6	0.4	n/a	/n/a	+
1:65243306|65255197	1	65243306	65255197	7	4_3_0	6	0.7	n/a	/n/a	+
1:65268659|65280523	1	65268659	65280523	11	2_3_1	7	0.759	n/a	/n/a	+
1:65278421|65280523	1	65278421	65280523	6	2_2_0	9	0.571	n/a	/n/a	+
1:65811294|65831879	1	65811294	65831879	8	1_2_3	96	0.143	n/a	/n/a	+
1:65830318|65831879	1	65830318	65831879	723	69_68_28	151	0.905	n/a	/n/a	+
1:67288044|67299831	1	67288044	67299831	3	2_2_0	0	1	n/a	/n/a	-
1:67356837|67371058	1	67356837	67371058	40	5_5_5	11	0.879	n/a	/n/a	-
1:67428771|67442405	1	67428771	67442405	6	1_1_1	6	0.667	n/a	/n/a	+
1:67864288|67865589	1	67864288	67865589	4	1_3_1	46	0.148	n/a	/n/a	-
1:68421744|68537556	1	68421744	68537556	2	1_1_1	0	1	n/a	/n/a	+
1:68960113|68960378	1	68960113	68960378	7	3_2_1	8	0.636	n/a	/n/a	-
1:70650468|70653021	1	70650468	70653021	5	2_1_2	54	0.156	n/a	/n/a	-
1:70650468|70654956	1	70650468	70654956	15	6_7_2	12	0.714	n/a	/n/a	-
1:70694105|70698060	1	70694105	70698060	4	2_1_0	31	0.205	n/a	/n/a	+
1:70758071|70766591	1	70758071	70766591	3	2_2_0	79	0.071	n/a	/n/a	-
1:70758071|70771973	1	70758071	70771973	25	6_5_7	99	0.336	n/a	/n/a	-
1:70758071|70781249	1	70758071	70781249	60	17_12_6	24	0.833	n/a	/n/a	-
1:70761813|70771973	1	70761813	70771973	18	3_2_4	190	0.159	n/a	/n/a	-
1:70761813|70779473	1	70761813	70779473	2	2_0_2	189	0.021	n/a	/n/a	-
1:70766447|70779473	1	70766447	70779473	6	3_1_2	183	0.062	n/a	/n/a	-
1:70766447|70781249	1	70766447	70781249	54	11_3_9	128	0.458	n/a	/n/a	-
1:70790536|70801782	1	70790536	70801782	12	3_0_4	24	0.5	n/a	/n/a	-
1:70790536|70804865	1	70790536	70804865	2	0_2_1	26	0.133	n/a	/n/a	-
1:70881639|70887358	1	70881639	70887358	12	1_1_1	61	0.282	n/a	/n/a	+
1:70881639|70890099	1	70881639	70890099	6	0_1_2	46	0.207	n/a	/n/a	+
1:71530652|71535045	1	71530652	71535045	15	3_1_4	14	0.682	n/a	/n/a	-
1:72999447|73023669	1	72999447	73023669	9	3_3_0	0	1	n/a	/n/a	+
1:76215104|76216231	1	76215104	76216231	9	1_2_1	27	0.4	n/a	/n/a	+
1:76253182|76255041	1	76253182	76255041	13	4_5_1	31	0.456	n/a	/n/a	+
1:77587960|77632515	1	77587960	77632515	3	0_1_2	34	0.15	n/a	/n/a	-
1:77672325|77676174	1	77672325	77676174	6	1_0_3	50	0.194	n/a	/n/a	-
1:77672325|77678032	1	77672325	77678032	67	6_2_19	38	0.779	n/a	/n/a	-
1:78031127|78034151	1	78031127	78034151	7	1_2_0	10	0.583	n/a	/n/a	-
1:78045212|78050340	1	78045212	78050340	5	2_0_1	20	0.333	n/a	/n/a	-
1:78098800|78107340	1	78098800	78107340	58	16_11_6	36	0.763	n/a	/n/a	-
1:78105134|78107340	1	78105134	78107340	11	5_5_0	38	0.367	n/a	/n/a	-
1:78107069|78107340	1	78107069	78107340	8	2_2_1	42	0.276	n/a	/n/a	-
1:78167054|78184326	1	78167054	78184326	9	0_1_2	69	0.207	n/a	/n/a	-
1:78177432|78180468	1	78177432	78180468	3	1_1_2	57	0.095	n/a	/n/a	-
1:78177432|78181553	1	78177432	78181553	5	1_2_0	55	0.154	n/a	/n/a	-
1:78183552|78184326	1	78183552	78184326	37	12_0_14	72	0.507	n/a	/n/a	-
1:78183552|78191447	1	78183552	78191447	50	13_14_0	28	0.781	n/a	/n/a	-
1:78189016|78191447	1	78189016	78191447	3	2_1_0	68	0.081	n/a	/n/a	-
1:78195545|78201843	1	78195545	78201843	4	1_2_1	39	0.17	n/a	/n/a	-
1:78200032|78201843	1	78200032	78201843	18	4_2_6	19	0.655	n/a	/n/a	-
1:78267016|78280916	1	78267016	78280916	6	2_2_1	42	0.222	n/a	/n/a	+
1:78268955|78272786	1	78268955	78272786	24	5_2_1	23	0.676	n/a	/n/a	+
1:78279419|78280916	1	78279419	78280916	5	1_2_0	28	0.263	n/a	/n/a	+
1:78324623|78327007	1	78324623	78327007	8	2_2_2	100	0.138	n/a	/n/a	+
1:78324623|78329713	1	78324623	78329713	63	12_13_8	39	0.764	n/a	/n/a	+
1:78324623|78332076	1	78324623	78332076	63	15_6_16	32	0.797	n/a	/n/a	+
1:78324623|78340796	1	78324623	78340796	9	2_3_1	27	0.4	n/a	/n/a	+
1:78338686|78340796	1	78338686	78340796	18	3_3_0	17	0.679	n/a	/n/a	+
1:78338689|78340796	1	78338689	78340796	11	1_1_2	17	0.564	n/a	/n/a	+
1:78478735|78479303	1	78478735	78479303	12	4_4_0	2	0.923	n/a	/n/a	+
1:84356004|84372146	1	84356004	84372146	6	2_1_0	6	0.667	n/a	/n/a	-
1:84644860|84650865	1	84644860	84650865	21	1_3_4	60	0.412	n/a	/n/a	+
1:84644860|84680000	1	84644860	84680000	37	2_7_4	23	0.763	n/a	/n/a	+
1:84644860|84701047	1	84644860	84701047	4	1_2_1	20	0.286	n/a	/n/a	+
1:85816098|85817262	1	85816098	85817262	6	2_1_1	62	0.162	n/a	/n/a	-
1:85816098|85824530	1	85816098	85824530	148	29_21_14	39	0.884	n/a	/n/a	-
1:86241357|86252144	1	86241357	86252144	19	0_4_4	2	0.95	n/a	/n/a	-
1:87181407|87185318	1	87181407	87185318	30	4_4_4	8	0.882	n/a	/n/a	+
1:87569115|87570388	1	87569115	87570388	4	1_1_1	11	0.421	n/a	/n/a	+
1:87805219|87805885	1	87805219	87805885	2	2_1_0	189	0.021	n/a	/n/a	+
1:89236035|89237562	1	89236035	89237562	12	1_3_0	41	0.369	n/a	/n/a	+
1:89236035|89251896	1	89236035	89251896	14	2_2_1	26	0.519	n/a	/n/a	+
1:89250322|89251896	1	89250322	89251896	41	7_6_5	62	0.569	n/a	/n/a	+
1:91356594|91383711	1	91356594	91383711	20	0_6_8	44	0.476	n/a	/n/a	-
1:91382197|91383711	1	91382197	91383711	463	56_36_40	76	0.924	n/a	/n/a	-
1:91967211|91989666	1	91967211	91989666	3	2_1_0	6	0.5	n/a	/n/a	+
1:92161229|92178099	1	92161229	92178099	2	2_2_0	48	0.077	n/a	/n/a	-
1:92220485|92224307	1	92220485	92224307	2	2_2_0	17	0.19	n/a	/n/a	-
1:92327028|92327201	1	92327028	92327201	11	3_2_0	29	0.431	n/a	/n/a	-
1:92554255|92573558	1	92554255	92573558	5	1_1_2	1	0.909	n/a	/n/a	+
1:92765751|92769632	1	92765751	92769632	2	1_1_2	10	0.286	n/a	/n/a	+
1:92767038|92769906	1	92767038	92769906	2	1_0_2	13	0.235	n/a	/n/a	+
1:92786156|92811471	1	92786156	92811471	25	0_5_7	174	0.223	n/a	/n/a	+
1:92798948|92811471	1	92798948	92811471	47	5_8_15	248	0.275	n/a	/n/a	+
1:92798948|92829327	1	92798948	92829327	38	8_4_16	107	0.415	n/a	/n/a	+
1:92798948|92846430	1	92798948	92846430	508	26_52_41	133	0.884	n/a	/n/a	+
1:92798973|92811471	1	92798973	92811471	8	1_0_3	309	0.049	n/a	/n/a	+
1:92798973|92829327	1	92798973	92829327	7	2_0_2	173	0.075	n/a	/n/a	+
1:92798973|92846430	1	92798973	92846430	28	1_6_4	199	0.22	n/a	/n/a	+
1:93029199|93073284	1	93029199	93073284	7	2_1_1	21	0.4	n/a	/n/a	-
1:93070864|93073284	1	93070864	93073284	25	6_6_5	9	0.847	n/a	/n/a	-
1:93159359|93170301	1	93159359	93170301	10	1_2_1	13	0.606	n/a	/n/a	-
1:93167698|93170301	1	93167698	93170301	8	1_1_2	10	0.615	n/a	/n/a	-
1:93201955|93202184	1	93201955	93202184	5	2_2_0	29	0.256	n/a	/n/a	-
1:93201955|93211359	1	93201955	93211359	5	2_1_1	12	0.455	n/a	/n/a	-
1:93301747|93303190	1	93301747	93303190	22	6_5_1	70	0.386	n/a	/n/a	+
1:93621857|93625783	1	93621857	93625783	18	5_2_4	32	0.529	n/a	/n/a	-
1:93648917|93659301	1	93648917	93659301	10	3_4_0	3	0.87	n/a	/n/a	+
1:93770945|93790286	1	93770945	93790286	9	2_1_1	40	0.31	n/a	/n/a	-
1:93804914|93805236	1	93804914	93805236	7	1_0_2	17	0.452	n/a	/n/a	-
1:94032836|94033408	1	94032836	94033408	435	49_33_29	72	0.924	n/a	/n/a	-
1:94037227|94041686	1	94037227	94041686	26	5_2_3	60	0.464	n/a	/n/a	-
1:94107860|94140497	1	94107860	94140497	187	3_33_39	142	0.725	n/a	/n/a	-
1:94132652|94140497	1	94132652	94140497	5	1_1_1	60	0.143	n/a	/n/a	-
1:94140170|94140497	1	94140170	94140497	37	13_13_0	141	0.344	n/a	/n/a	-
1:94360170|94363454	1	94360170	94363454	60	10_1_21	163	0.424	n/a	/n/a	-
1:94360170|94367225	1	94360170	94367225	107	18_12_14	44	0.829	n/a	/n/a	-
1:94360170|94370144	1	94360170	94370144	12	1_1_2	35	0.407	n/a	/n/a	-
1:94685814|94697199	1	94685814	94697199	71	14_15_7	22	0.866	n/a	/n/a	-
1:94924163|94941293	1	94924163	94941293	17	0_5_4	50	0.405	n/a	/n/a	+
1:94924163|94946162	1	94924163	94946162	32	0_7_4	46	0.582	n/a	/n/a	+
1:94930331|94941293	1	94930331	94941293	6	1_2_4	32	0.273	n/a	/n/a	+
1:94943815|94953539	1	94943815	94953539	4	1_1_2	169	0.045	n/a	/n/a	+
1:94943815|94956803	1	94943815	94956803	5	2_0_1	36	0.217	n/a	/n/a	+
1:94948726|94972198	1	94948726	94972198	6	2_2_0	21	0.364	n/a	/n/a	+
1:94953098|94956803	1	94953098	94956803	79	5_7_21	36	0.814	n/a	/n/a	+
1:95603831|95616975	1	95603831	95616975	11	1_0_3	70	0.239	n/a	/n/a	+
1:95603831|95639445	1	95603831	95639445	34	7_2_8	19	0.782	n/a	/n/a	+
1:95609447|95616975	1	95609447	95616975	104	21_13_18	96	0.684	n/a	/n/a	+
1:95609447|95639445	1	95609447	95639445	51	11_3_13	46	0.689	n/a	/n/a	+
1:97235259|97236407	1	97235259	97236407	37	10_9_1	5	0.937	n/a	/n/a	+
1:97235259|97250810	1	97235259	97250810	17	4_3_0	8	0.81	n/a	/n/a	+
1:97839117|97848017	1	97839117	97848017	17	3_0_2	8	0.81	n/a	/n/a	-
1:97981282|98015300	1	97981282	98015300	36	9_9_0	29	0.713	n/a	/n/a	-
1:97981282|98039526	1	97981282	98039526	4	2_2_0	33	0.195	n/a	/n/a	-
1:98015116|98039526	1	98015116	98039526	6	1_1_1	45	0.211	n/a	/n/a	-
1:98015116|98060722	1	98015116	98060722	4	2_1_0	52	0.133	n/a	/n/a	-
1:98144651|98165103	1	98144651	98165103	20	1_3_4	24	0.625	n/a	/n/a	-
1:100459093|100464971	1	100459093	100464971	56	10_15_7	6	0.949	n/a	/n/a	+
1:100472590|100483371	1	100472590	100483371	12	2_2_1	5	0.828	n/a	/n/a	+
1:100515465|100535241	1	100515465	100535241	26	4_4_7	7	0.881	n/a	/n/a	+
1:100524222|100527505	1	100524222	100527505	8	2_4_1	67	0.193	n/a	/n/a	+
1:100588766|100591498	1	100588766	100591498	3	2_0_3	6	0.5	n/a	/n/a	-
1:100661770|100672192	1	100661770	100672192	14	2_3_1	6	0.824	n/a	/n/a	-
1:100696289|100706440	1	100696289	100706440	4	2_2_0	2	0.8	n/a	/n/a	-
1:100889778|100908552	1	100889778	100908552	11	2_0_4	1	0.957	n/a	/n/a	+
1:101372408|101387397	1	101372408	101387397	26	4_8_1	16	0.765	n/a	/n/a	+
1:101376619|101387397	1	101376619	101387397	5	1_1_1	27	0.27	n/a	/n/a	+
1:101379219|101387397	1	101379219	101387397	21	5_4_2	35	0.545	n/a	/n/a	+
1:101427384|101440458	1	101427384	101440458	5	1_1_1	23	0.303	n/a	/n/a	+
1:108138834|108152587	1	108138834	108152587	9	2_0_3	0	1	n/a	/n/a	-
1:108686165|108703915	1	108686165	108703915	7	3_2_0	78	0.152	n/a	/n/a	-
1:108686165|108728576	1	108686165	108728576	13	1_1_3	36	0.419	n/a	/n/a	-
1:108690901|108703915	1	108690901	108703915	76	8_12_15	100	0.603	n/a	/n/a	-
1:108697605|108703915	1	108697605	108703915	12	2_2_3	117	0.17	n/a	/n/a	-
1:108697605|108724650	1	108697605	108724650	4	1_0_2	153	0.05	n/a	/n/a	-
1:108697605|108728576	1	108697605	108728576	18	4_6_0	76	0.321	n/a	/n/a	-
1:108724563|108728576	1	108724563	108728576	52	6_10_10	109	0.488	n/a	/n/a	-
1:108724563|108738102	1	108724563	108738102	41	6_4_11	95	0.463	n/a	/n/a	-
1:108724563|108741687	1	108724563	108741687	5	2_0_2	93	0.097	n/a	/n/a	-
1:109200073|109202584	1	109200073	109202584	15	5_3_2	25	0.545	n/a	/n/a	-
1:109336204|109342927	1	109336204	109342927	8	2_0_2	10	0.615	n/a	/n/a	+
1:109427897|109428200	1	109427897	109428200	12	2_3_1	4	0.857	n/a	/n/a	+
1:109439486|109446876	1	109439486	109446876	7	3_2_0	6	0.7	n/a	/n/a	+
1:109444412|109446876	1	109444412	109446876	13	3_3_0	7	0.788	n/a	/n/a	+
1:109560140|109566143	1	109560140	109566143	3	0_2_2	9	0.4	n/a	/n/a	-
1:109753418|109753741	1	109753418	109753741	6	4_4_0	0	1	n/a	/n/a	-
1:109766604|109772198	1	109766604	109772198	11	1_2_0	462	0.045	n/a	/n/a	+
1:109878862|109888500	1	109878862	109888500	15	3_5_2	130	0.188	n/a	/n/a	-
1:109883346|109888500	1	109883346	109888500	17	2_3_2	148	0.187	n/a	/n/a	-
1:109883346|109888503	1	109883346	109888503	12	4_5_1	143	0.144	n/a	/n/a	-
1:109884636|109888500	1	109884636	109888500	8	2_1_0	182	0.081	n/a	/n/a	-
1:109884636|109888503	1	109884636	109888503	12	4_3_0	177	0.119	n/a	/n/a	-
1:110765586|110768800	1	110765586	110768800	11	3_2_0	4	0.846	n/a	/n/a	+
1:111690264|111717585	1	111690264	111717585	6	2_1_1	0	1	n/a	/n/a	+
1:113098490|113159517	1	113098490	113159517	3	2_2_0	20	0.231	n/a	/n/a	-
1:113119608|113125094	1	113119608	113125094	3	1_2_1	25	0.194	n/a	/n/a	-
1:113119608|113134225	1	113119608	113134225	3	1_1_1	19	0.24	n/a	/n/a	-
1:113140593|113143470	1	113140593	113143470	2	1_0_2	21	0.16	n/a	/n/a	-
1:113196220|113202401	1	113196220	113202401	32	3_10_8	7	0.901	n/a	/n/a	+
1:113196220|113209767	1	113196220	113209767	11	1_2_1	1	0.957	n/a	/n/a	+
1:113464612|113471974	1	113464612	113471974	8	2_2_0	45	0.262	n/a	/n/a	-
1:113635828|113637377	1	113635828	113637377	5	0_2_2	10	0.5	n/a	/n/a	+
1:114128009|114137182	1	114128009	114137182	3	1_1_1	3	0.667	n/a	/n/a	+
1:114133106|114137182	1	114133106	114137182	4	1_2_1	3	0.727	n/a	/n/a	+
1:114214356|114216087	1	114214356	114216087	12	3_3_1	7	0.774	n/a	/n/a	+
1:114269040|114301355	1	114269040	114301355	9	1_2_1	6	0.75	n/a	/n/a	-
1:114319832|114320430	1	114319832	114320430	7	3_2_1	3	0.824	n/a	/n/a	-
1:115005726|115006178	1	115005726	115006178	41	13_12_0	140	0.369	n/a	/n/a	-
1:115005726|115007010	1	115005726	115007010	153	25_22_10	32	0.905	n/a	/n/a	-
1:115005726|115019709	1	115005726	115019709	9	2_2_0	18	0.5	n/a	/n/a	-
1:115282313|115292828	1	115282313	115292828	9	2_1_0	96	0.158	n/a	/n/a	-
1:116526170|116534864	1	116526170	116534864	12	3_3_1	8	0.75	n/a	/n/a	+
1:116534652|116580009	1	116534652	116580009	8	2_0_1	16	0.5	n/a	/n/a	+
1:116562203|116563506	1	116562203	116563506	34	9_8_3	13	0.84	n/a	/n/a	+
1:116562203|116569643	1	116562203	116569643	8	2_1_0	14	0.533	n/a	/n/a	+
1:116574024|116580009	1	116574024	116580009	8	4_3_1	21	0.432	n/a	/n/a	+
1:116576379|116580009	1	116576379	116580009	6	2_0_3	4	0.75	n/a	/n/a	+
1:117086933|117087226	1	117086933	117087226	3	1_2_0	2	0.75	n/a	/n/a	-
1:117626640|117631604	1	117626640	117631604	4	1_2_0	4	0.667	n/a	/n/a	+
1:117911041|117963271	1	117911041	117963271	5	1_1_2	89	0.101	n/a	/n/a	+
1:117944808|117984947	1	117944808	117984947	6	1_1_1	26	0.316	n/a	/n/a	+
1:117948171|117984947	1	117948171	117984947	5	1_0_2	29	0.256	n/a	/n/a	+
1:117957335|117984947	1	117957335	117984947	13	4_3_1	121	0.177	n/a	/n/a	+
1:117984853|118009049	1	117984853	118009049	2	1_1_2	38	0.095	n/a	/n/a	+
1:118035769|118045592	1	118035769	118045592	33	4_4_5	2	0.971	n/a	/n/a	+
1:118409367|118413238	1	118409367	118413238	2	0_2_2	16	0.2	n/a	/n/a	-
1:118449128|118461358	1	118449128	118461358	11	2_5_3	56	0.282	n/a	/n/a	-
1:118454616|118461358	1	118454616	118461358	29	6_7_3	53	0.523	n/a	/n/a	-
1:119805525|119817929	1	119805525	119817929	9	0_2_2	35	0.34	n/a	/n/a	+
1:119805525|119820595	1	119805525	119820595	21	0_4_8	19	0.689	n/a	/n/a	+
1:120455284|120455485	1	120455284	120455485	7	1_1_2	26	0.35	n/a	/n/a	-
1:120466260|120466607	1	120466260	120466607	2	2_1_1	67	0.056	n/a	/n/a	-
1:144013901|144014093	1	144013901	144014093	3	2_1_1	55	0.098	n/a	/n/a	+
1:144595835|144596473	1	144595835	144596473	12	3_4_2	38	0.387	n/a	/n/a	+
1:144595835|144598780	1	144595835	144598780	12	2_2_1	40	0.375	n/a	/n/a	+
1:145487304|145492375	1	145487304	145492375	5	1_2_0	23	0.303	n/a	/n/a	+
1:145592633|145595220	1	145592633	145595220	21	5_3_0	28	0.6	n/a	/n/a	-
1:145640883|145663367	1	145640883	145663367	4	2_1_0	47	0.145	n/a	/n/a	+
1:145646115|145663367	1	145646115	145663367	15	1_3_3	39	0.435	n/a	/n/a	+
1:146724278|146731572	1	146724278	146731572	60	12_10_8	11	0.916	n/a	/n/a	+
1:146737591|146740537	1	146737591	146740537	9	3_1_2	24	0.429	n/a	/n/a	+
1:146757975|146759412	1	146757975	146759412	46	12_11_4	9	0.911	n/a	/n/a	+
1:149858487|149858871	1	149858487	149858871	2	2_2_0	81771	0	n/a	/n/a	+
1:150064031|150082742	1	150064031	150082742	8	2_2_0	40	0.286	n/a	/n/a	+
1:150202906|150204264	1	150202906	150204264	16	5_3_3	2	0.941	n/a	/n/a	-
1:150307406|150310802	1	150307406	150310802	2	1_2_0	7	0.364	n/a	/n/a	+
1:150386780|150390201	1	150386780	150390201	3	1_1_1	3	0.667	n/a	/n/a	+
1:150413399|150416853	1	150413399	150416853	23	3_4_7	26	0.639	n/a	/n/a	+
1:150418702|150430046	1	150418702	150430046	7	2_2_0	48	0.226	n/a	/n/a	+
1:150507422|150507649	1	150507422	150507649	8	2_1_0	1	0.941	n/a	/n/a	-
1:150593366|150593548	1	150593366	150593548	10	2_3_1	30	0.4	n/a	/n/a	-
1:150634290|150636239	1	150634290	150636239	15	5_5_1	19	0.612	n/a	/n/a	-
1:150790396|150799093	1	150790396	150799093	12	2_2_2	43	0.358	n/a	/n/a	-
1:150902443|150913904	1	150902443	150913904	19	5_2_3	110	0.257	n/a	/n/a	+
1:150933039|150934634	1	150933039	150934634	2	2_1_1	19	0.174	n/a	/n/a	+
1:150997087|150998149	1	150997087	150998149	16	6_5_0	42	0.432	n/a	/n/a	+
1:150997087|150999803	1	150997087	150999803	19	2_1_4	23	0.623	n/a	/n/a	+
1:150999709|151001420	1	150999709	151001420	5	0_2_2	32	0.238	n/a	/n/a	+
1:151060666|151065862	1	151060666	151065862	7	0_2_1	6	0.7	n/a	/n/a	+
1:151060666|151079698	1	151060666	151079698	6	1_1_1	6	0.667	n/a	/n/a	+
1:151111901|151112566	1	151111901	151112566	11	0_3_3	11	0.667	n/a	/n/a	-
1:151139410|151139890	1	151139410	151139890	47	5_2_13	175	0.349	n/a	/n/a	+
1:151150477|151156969	1	151150477	151156969	6	2_1_0	273	0.042	n/a	/n/a	-
1:151199796|151205179	1	151199796	151205179	11	1_3_1	24	0.478	n/a	/n/a	+
1:151206673|151206972	1	151206673	151206972	6	2_2_0	6	0.667	n/a	/n/a	+
1:151209034|151209239	1	151209034	151209239	29	4_9_0	38	0.604	n/a	/n/a	+
1:151214599|151215043	1	151214599	151215043	5	2_2_0	39	0.204	n/a	/n/a	+
1:151288049|151288985	1	151288049	151288985	15	3_3_1	134	0.183	n/a	/n/a	-
1:151384101|151384872	1	151384101	151384872	7	2_1_0	51	0.215	n/a	/n/a	-
1:151413404|151414681	1	151413404	151414681	6	1_1_2	12	0.5	n/a	/n/a	-
1:151611364|151611595	1	151611364	151611595	381	48_51_7	60	0.927	n/a	/n/a	+
1:151611364|151641111	1	151611364	151641111	17	1_3_2	41	0.453	n/a	/n/a	+
1:151611364|151655921	1	151611364	151655921	11	1_0_4	56	0.282	n/a	/n/a	+
1:151630711|151641111	1	151630711	151641111	40	10_12_0	38	0.678	n/a	/n/a	+
1:151630711|151655921	1	151630711	151655921	12	2_1_2	54	0.308	n/a	/n/a	+
1:153637696|153641033	1	153637696	153641033	4	1_1_1	117	0.064	n/a	/n/a	-
1:153640031|153641033	1	153640031	153641033	4	1_1_1	97	0.076	n/a	/n/a	-
1:153723571|153730239	1	153723571	153730239	10	3_4_0	41	0.328	n/a	/n/a	+
1:153727118|153730239	1	153727118	153730239	27	4_7_2	29	0.651	n/a	/n/a	+
1:153791267|153792211	1	153791267	153792211	24	4_4_1	18	0.727	n/a	/n/a	-
1:154213989|154218851	1	154213989	154218851	25	0_8_10	88	0.362	n/a	/n/a	+
1:154223517|154224129	1	154223517	154224129	5	3_4_1	55	0.154	n/a	/n/a	+
1:155322497|155324421	1	155322497	155324421	10	2_2_0	20	0.5	n/a	/n/a	-
1:155348072|155349907	1	155348072	155349907	8	2_2_4	14	0.533	n/a	/n/a	-
1:155348072|155365344	1	155348072	155365344	5	1_1_2	14	0.417	n/a	/n/a	-
1:155365250|155385714	1	155365250	155385714	4	1_2_0	27	0.229	n/a	/n/a	-
1:155377929|155385714	1	155377929	155385714	13	1_3_3	18	0.591	n/a	/n/a	-
1:155377933|155385714	1	155377933	155385714	12	1_4_2	18	0.571	n/a	/n/a	-
1:155408118|155429689	1	155408118	155429689	10	3_2_0	8	0.714	n/a	/n/a	-
1:155490891|155491409	1	155490891	155491409	14	2_0_1	14	0.667	n/a	/n/a	-
1:155638418|155644887	1	155638418	155644887	5	1_1_2	90	0.1	n/a	/n/a	-
1:155640111|155644887	1	155640111	155644887	14	4_2_3	116	0.194	n/a	/n/a	-
1:155640111|155649303	1	155640111	155649303	9	2_1_3	85	0.175	n/a	/n/a	-
1:155640111|155650247	1	155640111	155650247	5	3_0_3	51	0.164	n/a	/n/a	-
1:155640111|155753880	1	155640111	155753880	2	1_1_1	42	0.087	n/a	/n/a	-
1:155644801|155649303	1	155644801	155649303	15	4_1_5	97	0.236	n/a	/n/a	-
1:155646339|155649303	1	155646339	155649303	168	34_23_15	143	0.701	n/a	/n/a	-
1:155646339|155650247	1	155646339	155650247	12	2_0_4	110	0.179	n/a	/n/a	-
1:155646339|155753880	1	155646339	155753880	53	10_8_4	101	0.512	n/a	/n/a	-
1:155679564|155686919	1	155679564	155686919	6	1_3_2	78	0.133	n/a	/n/a	+
1:155679564|155691409	1	155679564	155691409	7	2_2_5	104	0.119	n/a	/n/a	+
1:155686797|155695810	1	155686797	155695810	12	3_1_2	154	0.135	n/a	/n/a	+
1:155691308|155695810	1	155691308	155695810	62	11_13_16	157	0.441	n/a	/n/a	+
1:155695173|155695810	1	155695173	155695810	102	20_20_12	205	0.499	n/a	/n/a	+
1:155740858|155743001	1	155740858	155743001	5	2_2_1	4	0.714	n/a	/n/a	-
1:155747413|155753880	1	155747413	155753880	26	7_4_3	13	0.8	n/a	/n/a	-
1:155783425|155784240	1	155783425	155784240	5	3_3_0	12	0.455	n/a	/n/a	-
1:155823067|155823597	1	155823067	155823597	102	23_26_3	36	0.85	n/a	/n/a	-
1:155891166|155891709	1	155891166	155891709	15	7_0_7	65	0.316	n/a	/n/a	-
1:155891166|155895634	1	155891166	155895634	6	1_2_0	43	0.218	n/a	/n/a	-
1:155895423|155896947	1	155895423	155896947	6	2_1_1	77	0.135	n/a	/n/a	-
1:155896467|155896947	1	155896467	155896947	14	6_3_2	57	0.329	n/a	/n/a	-
1:155927504|155928187	1	155927504	155928187	13	2_1_2	321	0.075	n/a	/n/a	-
1:156169626|156170263	1	156169626	156170263	14	7_6_0	28	0.5	n/a	/n/a	+
1:156202111|156203519	1	156202111	156203519	9	3_3_2	333	0.051	n/a	/n/a	+
1:156242111|156244477	1	156242111	156244477	5	0_2_1	278	0.035	n/a	/n/a	-
1:156243152|156248825	1	156243152	156248825	6	1_2_0	109	0.099	n/a	/n/a	-
1:156288659|156305679	1	156288659	156305679	4	2_0_1	321	0.024	n/a	/n/a	-
1:156290630|156304709	1	156290630	156304709	11	3_0_4	223	0.09	n/a	/n/a	-
1:156303338|156304709	1	156303338	156304709	50	6_2_17	315	0.241	n/a	/n/a	-
1:156303338|156305679	1	156303338	156305679	18	5_0_7	229	0.136	n/a	/n/a	-
1:156499897|156501039	1	156499897	156501039	2	1_1_1	43	0.085	n/a	/n/a	-
1:156562186|156562462	1	156562186	156562462	7	2_1_1	362	0.037	n/a	/n/a	+
1:159888553|159890327	1	159888553	159890327	19	3_6_1	555	0.064	n/a	/n/a	-
1:159889451|159890327	1	159889451	159890327	3	2_1_0	216	0.027	n/a	/n/a	-
1:160206925|160210160	1	160206925	160210160	3	1_1_1	107	0.053	n/a	/n/a	-
1:160281658|160282957	1	160281658	160282957	10	1_1_1	92	0.179	n/a	/n/a	-
1:160293221|160302347	1	160293221	160302347	82	14_15_11	288	0.363	n/a	/n/a	-
1:161721656|161723051	1	161721656	161723051	4	0_2_1	16	0.333	n/a	/n/a	+
1:161748034|161753886	1	161748034	161753886	13	2_3_4	116	0.183	n/a	/n/a	+
1:161816239|161823113	1	161816239	161823113	5	1_0_2	55	0.154	n/a	/n/a	+
1:161816239|161833102	1	161816239	161833102	6	2_1_1	47	0.203	n/a	/n/a	+
1:161821512|161833102	1	161821512	161833102	8	1_2_1	59	0.213	n/a	/n/a	+
1:162257134|162302915	1	162257134	162302915	7	1_0_2	14	0.5	n/a	/n/a	+
1:162535802|162536138	1	162535802	162536138	30	3_8_0	37	0.619	n/a	/n/a	+
1:164776779|164790863	1	164776779	164790863	8	2_2_2	49	0.246	n/a	/n/a	+
1:165648679|165652347	1	165648679	165652347	50	12_7_8	110	0.476	n/a	/n/a	-
1:165649724|165664634	1	165649724	165664634	17	4_5_0	163	0.173	n/a	/n/a	-
1:165712404|165723511	1	165712404	165723511	2	2_1_1	59	0.063	n/a	/n/a	-
1:165859441|165860559	1	165859441	165860559	8	2_2_2	22	0.421	n/a	/n/a	+
1:165859441|165865569	1	165859441	165865569	2	2_1_0	20	0.167	n/a	/n/a	+
1:167301707|167307495	1	167301707	167307495	3	1_2_2	0	1	n/a	/n/a	+
1:167515338|167517358	1	167515338	167517358	7	2_1_0	24	0.368	n/a	/n/a	-
1:167734820|167742605	1	167734820	167742605	18	3_4_3	31	0.537	n/a	/n/a	+
1:167734820|167745403	1	167734820	167745403	27	7_6_1	16	0.771	n/a	/n/a	+
1:167734820|167757374	1	167734820	167757374	9	2_2_0	47	0.277	n/a	/n/a	+
1:167741512|167745403	1	167741512	167745403	23	7_4_2	23	0.667	n/a	/n/a	+
1:167921038|167944253	1	167921038	167944253	109	10_32_6	54	0.801	n/a	/n/a	+
1:167935867|167944253	1	167935867	167944253	237	21_37_8	52	0.901	n/a	/n/a	+
1:167971720|167974031	1	167971720	167974031	22	5_8_2	11	0.8	n/a	/n/a	+
1:167971720|167992285	1	167971720	167992285	5	1_0_3	2	0.833	n/a	/n/a	+
1:168025237|168025432	1	168025237	168025432	2	1_1_2	34	0.105	n/a	/n/a	-
1:168034828|168037701	1	168034828	168037701	12	1_1_1	0	1	n/a	/n/a	+
1:168200752|168208398	1	168200752	168208398	10	1_0_3	11	0.645	n/a	/n/a	+
1:168260398|168269721	1	168260398	168269721	10	5_1_3	2	0.909	n/a	/n/a	+
1:169199956|169206925	1	169199956	169206925	9	3_1_4	58	0.237	n/a	/n/a	-
1:169199956|169256646	1	169199956	169256646	37	2_7_11	26	0.74	n/a	/n/a	-
1:169288397|169293738	1	169288397	169293738	8	3_2_1	6	0.727	n/a	/n/a	-
1:169292355|169293738	1	169292355	169293738	9	4_3_1	14	0.562	n/a	/n/a	-
1:169446393|169446995	1	169446393	169446995	29	7_7_0	23	0.716	n/a	/n/a	-
1:169767998|169770112	1	169767998	169770112	4	1_2_0	14	0.364	n/a	/n/a	+
1:169947226|170001116	1	169947226	170001116	43	12_9_8	13	0.869	n/a	/n/a	-
1:169985603|169993737	1	169985603	169993737	12	5_4_0	103	0.189	n/a	/n/a	-
1:170001027|170024577	1	170001027	170024577	15	2_3_3	30	0.5	n/a	/n/a	-
1:171491316|171492661	1	171491316	171492661	4	1_1_1	82	0.089	n/a	/n/a	+
1:171492360|171494104	1	171492360	171494104	10	1_1_1	96	0.172	n/a	/n/a	+
1:171492360|171496983	1	171492360	171496983	32	6_3_5	39	0.621	n/a	/n/a	+
1:171537386|171544267	1	171537386	171544267	15	1_6_4	7	0.811	n/a	/n/a	+
1:172520652|172522510	1	172520652	172522510	13	2_3_2	140	0.157	n/a	/n/a	+
1:172520652|172526934	1	172520652	172526934	217	21_32_19	52	0.893	n/a	/n/a	+
1:172520652|172548407	1	172520652	172548407	4	1_1_2	29	0.216	n/a	/n/a	+
1:172525009|172526934	1	172525009	172526934	50	7_8_3	157	0.389	n/a	/n/a	+
1:172538159|172548407	1	172538159	172548407	4	1_0_2	20	0.286	n/a	/n/a	+
1:172569204|172571927	1	172569204	172571927	21	6_2_4	14	0.75	n/a	/n/a	+
1:173409602|173411187	1	173409602	173411187	4	1_1_1	29	0.216	n/a	/n/a	-
1:173702852|173703425	1	173702852	173703425	20	4_5_0	21	0.656	n/a	/n/a	+
1:173725062|173726298	1	173725062	173726298	8	1_2_1	25	0.39	n/a	/n/a	+
1:173772101|173772643	1	173772101	173772643	10	3_3_0	33	0.377	n/a	/n/a	-
1:173795825|173799899	1	173795825	173799899	4	1_1_1	12	0.4	n/a	/n/a	+
1:173834367|173834685	1	173834367	173834685	3	2_1_0	11	0.353	n/a	/n/a	-
1:173835666|173835934	1	173835666	173835934	6	2_1_0	22	0.353	n/a	/n/a	-
1:173910403|173912753	1	173910403	173912753	4	2_2_0	3	0.727	n/a	/n/a	-
1:173915614|173916720	1	173915614	173916720	17	3_4_1	3	0.919	n/a	/n/a	-
1:173961893|173962273	1	173961893	173962273	31	11_5_0	15	0.805	n/a	/n/a	-
1:174241552|174247917	1	174241552	174247917	14	2_3_1	17	0.622	n/a	/n/a	+
1:174241552|174274265	1	174241552	174274265	14	1_2_1	20	0.583	n/a	/n/a	+
1:174606513|174781098	1	174606513	174781098	13	2_2_0	0	1	n/a	/n/a	+
1:175889592|175891313	1	175889592	175891313	6	1_1_1	0	1	n/a	/n/a	-
1:175956079|175958615	1	175956079	175958615	24	6_5_0	24	0.667	n/a	/n/a	-
1:175996708|176015460	1	175996708	176015460	51	7_8_7	44	0.699	n/a	/n/a	-
1:175996708|176104222	1	175996708	176104222	2	2_2_0	46	0.08	n/a	/n/a	-
1:176012322|176015460	1	176012322	176015460	4	0_1_2	56	0.125	n/a	/n/a	-
1:176050288|176055026	1	176050288	176055026	7	3_3_0	106	0.117	n/a	/n/a	-
1:176050288|176085817	1	176050288	176085817	13	5_2_3	54	0.325	n/a	/n/a	-
1:176050288|176104222	1	176050288	176104222	5	3_2_1	54	0.156	n/a	/n/a	-
1:176050288|176105683	1	176050288	176105683	15	7_2_4	41	0.423	n/a	/n/a	-
1:176050288|176113236	1	176050288	176113236	3	2_1_1	40	0.13	n/a	/n/a	-
1:176050288|176118210	1	176050288	176118210	10	2_0_2	68	0.227	n/a	/n/a	-
1:176050288|176133027	1	176050288	176133027	9	3_0_1	91	0.165	n/a	/n/a	-
1:176050288|176145143	1	176050288	176145143	5	1_1_2	169	0.056	n/a	/n/a	-
1:176085760|176145143	1	176085760	176145143	11	2_1_3	170	0.115	n/a	/n/a	-
1:176104146|176133027	1	176104146	176133027	6	1_0_3	71	0.145	n/a	/n/a	-
1:176118142|176133027	1	176118142	176133027	19	4_1_6	81	0.319	n/a	/n/a	-
1:176118142|176145143	1	176118142	176145143	44	3_4_13	160	0.355	n/a	/n/a	-
1:176118142|176153828	1	176118142	176153828	31	4_4_11	50	0.554	n/a	/n/a	-
1:176132005|176133027	1	176132005	176133027	40	11_6_6	109	0.423	n/a	/n/a	-
1:176132005|176145143	1	176132005	176145143	65	13_8_8	192	0.404	n/a	/n/a	-
1:176132005|176153828	1	176132005	176153828	108	23_8_26	81	0.727	n/a	/n/a	-
1:176882366|176905506	1	176882366	176905506	3	1_1_1	8	0.429	n/a	/n/a	-
1:178252699|178269253	1	178252699	178269253	13	2_2_2	12	0.684	n/a	/n/a	+
1:178252699|178359341	1	178252699	178359341	8	2_2_0	18	0.471	n/a	/n/a	+
1:178745817|178754742	1	178745817	178754742	20	9_3_6	20	0.667	n/a	/n/a	+
1:178777180|178790839	1	178777180	178790839	5	0_1_2	16	0.385	n/a	/n/a	+
1:178777180|178802685	1	178777180	178802685	18	0_2_4	13	0.735	n/a	/n/a	+
1:178780450|178802685	1	178780450	178802685	16	1_5_3	6	0.842	n/a	/n/a	+
1:178802559|178813872	1	178802559	178813872	3	2_0_2	7	0.462	n/a	/n/a	+
1:179012850|179019500	1	179012850	179019500	9	2_0_3	26	0.409	n/a	/n/a	+
1:179019414|179035994	1	179019414	179035994	4	0_2_3	55	0.127	n/a	/n/a	+
1:179033062|179033631	1	179033062	179033631	8	3_3_0	40	0.286	n/a	/n/a	+
1:179033062|179035994	1	179033062	179035994	18	6_1_5	40	0.474	n/a	/n/a	+
1:179054763|179055028	1	179054763	179055028	11	2_1_0	184	0.107	n/a	/n/a	+
1:179054763|179057224	1	179054763	179057224	19	6_7_0	275	0.121	n/a	/n/a	+
1:179081444|179089409	1	179081444	179089409	3	1_2_1	42	0.125	n/a	/n/a	-
1:179087722|179089409	1	179087722	179089409	2	2_1_0	47	0.078	n/a	/n/a	-
1:179087722|179091002	1	179087722	179091002	5	2_2_0	38	0.208	n/a	/n/a	-
1:179095512|179102509	1	179095512	179102509	8	2_1_1	32	0.333	n/a	/n/a	-
1:179100446|179102509	1	179100446	179102509	159	30_12_20	53	0.857	n/a	/n/a	-
1:179271812|179276351	1	179271812	179276351	17	4_5_0	21	0.618	n/a	/n/a	+
1:179306972|179310445	1	179306972	179310445	8	0_2_3	31	0.34	n/a	/n/a	+
1:179316735|179319566	1	179316735	179319566	12	1_2_3	24	0.5	n/a	/n/a	+
1:179869261|179877808	1	179869261	179877808	6	0_2_3	28	0.3	n/a	/n/a	+
1:179955304|179961356	1	179955304	179961356	23	5_5_1	10	0.821	n/a	/n/a	+
1:179959642|179961356	1	179959642	179961356	25	5_7_1	21	0.704	n/a	/n/a	+
1:179972309|179975702	1	179972309	179975702	9	1_2_3	19	0.486	n/a	/n/a	+
1:179991941|180062789	1	179991941	180062789	7	0_2_1	14	0.5	n/a	/n/a	+
1:180047598|180049796	1	180047598	180049796	11	3_3_0	2	0.917	n/a	/n/a	+
1:180256411|180257652	1	180256411	180257652	9	1_2_0	28	0.391	n/a	/n/a	-
1:180366651|180382606	1	180366651	180382606	176	15_25_30	87	0.802	n/a	/n/a	-
1:180756889|180780624	1	180756889	180780624	18	1_0_4	12	0.75	n/a	/n/a	+
1:180793889|180794480	1	180793889	180794480	39	10_12_4	21	0.788	n/a	/n/a	+
1:180953813|180962561	1	180953813	180962561	80	10_4_19	72	0.69	n/a	/n/a	-
1:180953813|180974599	1	180953813	180974599	21	4_4_3	42	0.5	n/a	/n/a	-
1:180971742|180974599	1	180971742	180974599	32	6_9_5	46	0.582	n/a	/n/a	-
1:182811680|182812569	1	182811680	182812569	14	3_2_1	51	0.354	n/a	/n/a	+
1:183083666|183084772	1	183083666	183084772	6	2_2_0	152	0.073	n/a	/n/a	+
1:183481972|183486955	1	183481972	183486955	16	0_4_5	17	0.653	n/a	/n/a	+
1:183481972|183498668	1	183481972	183498668	5	0_1_2	28	0.263	n/a	/n/a	+
1:184023488|184042140	1	184023488	184042140	8	2_2_0	32	0.333	n/a	/n/a	+
1:184701971|184718726	1	184701971	184718726	4	1_0_2	4	0.667	n/a	/n/a	-
1:184853767|184859356	1	184853767	184859356	9	4_4_0	281	0.06	n/a	/n/a	-
1:185056684|185060871	1	185056684	185060871	8	5_5_0	8	0.667	n/a	/n/a	+
1:185056684|185062408	1	185056684	185062408	3	1_2_1	6	0.5	n/a	/n/a	+
1:185106574|185112568	1	185106574	185112568	3	1_0_2	0	1	n/a	/n/a	-
1:185183639|185200840	1	185183639	185200840	19	6_3_1	2	0.95	n/a	/n/a	+
1:185335549|185343688	1	185335549	185343688	3	2_2_0	10	0.375	n/a	/n/a	+
1:185339800|185343688	1	185339800	185343688	8	1_1_1	27	0.372	n/a	/n/a	+
1:185427907|185472151	1	185427907	185472151	8	1_1_1	0	1	n/a	/n/a	+
1:186359843|186360923	1	186359843	186360923	14	1_2_3	8	0.778	n/a	/n/a	+
1:186375215|186388209	1	186375215	186388209	5	1_1_1	0	1	n/a	/n/a	+
1:186862143|186880521	1	186862143	186880521	10	2_2_0	0	1	n/a	/n/a	+
1:192904959|192926552	1	192904959	192926552	8	0_3_3	3	0.842	n/a	/n/a	-
1:192997215|192998787	1	192997215	192998787	7	0_3_4	16	0.467	n/a	/n/a	-
1:193044950|193046180	1	193044950	193046180	18	3_4_0	14	0.72	n/a	/n/a	+
1:193065778|193070334	1	193065778	193070334	15	4_5_3	11	0.732	n/a	/n/a	-
1:193116997|193121574	1	193116997	193121574	6	2_0_4	25	0.324	n/a	/n/a	+
1:193172925|193205486	1	193172925	193205486	8	3_3_3	18	0.471	n/a	/n/a	+
1:193202123|193205486	1	193202123	193205486	107	17_17_9	40	0.843	n/a	/n/a	+
1:193318263|193324971	1	193318263	193324971	4	2_1_1	2	0.8	n/a	/n/a	+
1:193318263|193324988	1	193318263	193324988	5	2_2_0	2	0.833	n/a	/n/a	+
1:193318263|193324991	1	193318263	193324991	7	2_2_0	2	0.875	n/a	/n/a	+
1:193332351|193334904	1	193332351	193334904	8	1_1_1	0	1	n/a	/n/a	+
1:197086919|197094085	1	197086919	197094085	5	2_1_0	1	0.909	n/a	/n/a	-
1:197093240|197094321	1	197093240	197094321	4	2_2_0	14	0.364	n/a	/n/a	-
1:197552282|197576304	1	197552282	197576304	6	0_1_2	73	0.141	n/a	/n/a	-
1:197552282|197586889	1	197552282	197586889	15	3_3_2	101	0.229	n/a	/n/a	-
1:197552282|197614873	1	197552282	197614873	26	3_1_6	381	0.12	n/a	/n/a	-
1:197552282|197742062	1	197552282	197742062	3	2_1_3	18	0.25	n/a	/n/a	-
1:197564338|197586889	1	197564338	197586889	19	3_2_3	157	0.195	n/a	/n/a	-
1:197564338|197684204	1	197564338	197684204	6	2_0_2	116	0.094	n/a	/n/a	-
1:197576203|197627499	1	197576203	197627499	14	2_2_3	358	0.073	n/a	/n/a	-
1:197586789|197627499	1	197586789	197627499	6	2_0_1	364	0.032	n/a	/n/a	-
1:197611841|197627499	1	197611841	197627499	50	10_4_14	375	0.211	n/a	/n/a	-
1:197611841|197641286	1	197611841	197641286	3	2_2_0	284	0.021	n/a	/n/a	-
1:197611841|197643299	1	197611841	197643299	37	8_1_10	191	0.279	n/a	/n/a	-
1:197611841|197684204	1	197611841	197684204	11	4_0_6	143	0.133	n/a	/n/a	-
1:197611841|197742062	1	197611841	197742062	23	5_1_6	102	0.311	n/a	/n/a	-
1:197621365|197643299	1	197621365	197643299	41	7_2_16	487	0.144	n/a	/n/a	-
1:197621365|197684204	1	197621365	197684204	78	10_3_23	441	0.261	n/a	/n/a	-
1:197641167|197643299	1	197641167	197643299	31	10_3_9	420	0.129	n/a	/n/a	-
1:198201683|198222310	1	198201683	198222310	7	1_2_1	115	0.109	n/a	/n/a	+
1:198201683|198233365	1	198201683	198233365	62	6_14_11	82	0.602	n/a	/n/a	+
1:198201683|198266370	1	198201683	198266370	7	2_3_0	66	0.175	n/a	/n/a	+
1:198222170|198233365	1	198222170	198233365	52	11_5_9	117	0.471	n/a	/n/a	+
1:198231705|198266370	1	198231705	198266370	17	1_5_4	98	0.258	n/a	/n/a	+
1:198247091|198248191	1	198247091	198248191	7	0_1_2	59	0.192	n/a	/n/a	+
1:198247091|198266370	1	198247091	198266370	12	1_2_3	72	0.25	n/a	/n/a	+
1:200523596|200528580	1	200523596	200528580	12	2_4_1	0	1	n/a	/n/a	-
1:200561208|200562897	1	200561208	200562897	5	1_1_1	13	0.435	n/a	/n/a	-
1:200577958|200587780	1	200577958	200587780	4	1_3_1	38	0.174	n/a	/n/a	-
1:200583446|200584737	1	200583446	200584737	8	4_3_2	15	0.516	n/a	/n/a	-
1:200709008|200811215	1	200709008	200811215	6	1_0_3	9	0.571	n/a	/n/a	+
1:200709042|200784772	1	200709042	200784772	6	0_1_2	48	0.2	n/a	/n/a	+
1:200729967|200730226	1	200729967	200730226	141	21_35_8	122	0.698	n/a	/n/a	+
1:200729967|200733603	1	200729967	200733603	13	1_2_2	24	0.52	n/a	/n/a	+
1:200729967|200776665	1	200729967	200776665	3	2_2_0	164	0.035	n/a	/n/a	+
1:200729967|200784772	1	200729967	200784772	130	30_10_29	63	0.805	n/a	/n/a	+
1:200729967|200801973	1	200729967	200801973	25	7_7_0	44	0.532	n/a	/n/a	+
1:200776504|200784772	1	200776504	200784772	34	4_5_4	125	0.352	n/a	/n/a	+
1:200776504|200801973	1	200776504	200801973	19	5_5_0	106	0.264	n/a	/n/a	+
1:201112948|201123087	1	201112948	201123087	7	3_1_3	160	0.08	n/a	/n/a	-
1:201490569|201491153	1	201490569	201491153	7	1_3_1	42	0.25	n/a	/n/a	+
1:201804082|201817722	1	201804082	201817722	7	0_1_2	15	0.483	n/a	/n/a	+
1:201816407|201817722	1	201816407	201817722	28	2_9_6	23	0.709	n/a	/n/a	+
1:201826224|201828122	1	201826224	201828122	28	1_5_1	28	0.667	n/a	/n/a	+
1:201966447|201969143	1	201966447	201969143	14	3_3_0	70	0.286	n/a	/n/a	+
1:202104278|202104928	1	202104278	202104928	15	3_0_3	258	0.104	n/a	/n/a	-
1:202385915|202398057	1	202385915	202398057	50	13_8_11	13	0.885	n/a	/n/a	+
1:202531906|202538325	1	202531906	202538325	4	2_0_3	1	0.889	n/a	/n/a	+
1:202724399|202727638	1	202724399	202727638	4	2_1_1	36	0.182	n/a	/n/a	-
1:202724399|202733273	1	202724399	202733273	5	2_1_1	17	0.37	n/a	/n/a	-
1:202742246|202746222	1	202742246	202746222	14	4_3_2	6	0.824	n/a	/n/a	-
1:202920058|202923435	1	202920058	202923435	12	4_0_3	318	0.07	n/a	/n/a	-
1:203676137|203677232	1	203676137	203677232	11	4_2_1	22	0.5	n/a	/n/a	+
1:204082043|204083733	1	204082043	204083733	13	3_1_2	8	0.765	n/a	/n/a	+
1:204390736|204394869	1	204390736	204394869	3	1_1_1	14	0.3	n/a	/n/a	-
1:204494612|204501374	1	204494612	204501374	3	1_0_2	3	0.667	n/a	/n/a	+
1:205072985|205074296	1	205072985	205074296	7	1_2_0	19	0.424	n/a	/n/a	-
1:205126401|205129398	1	205126401	205129398	6	1_2_0	34	0.261	n/a	/n/a	-
1:205156546|205156934	1	205156546	205156934	2	2_2_0	5	0.444	n/a	/n/a	-
1:205679951|205681106	1	205679951	205681106	5	1_1_1	7	0.588	n/a	/n/a	-
1:206771218|206771494	1	206771218	206771494	5	1_1_1	16	0.385	n/a	/n/a	-
1:207532891|207536124	1	207532891	207536124	9	1_1_2	9	0.667	n/a	/n/a	+
1:207930359|207933069	1	207930359	207933069	8	2_2_2	9	0.64	n/a	/n/a	+
1:207989274|207990759	1	207989274	207990759	117	24_25_5	32	0.88	n/a	/n/a	-
1:207989274|208000229	1	207989274	208000229	6	2_2_0	5	0.706	n/a	/n/a	-
1:211092982|211093411	1	211092982	211093411	26	8_7_0	3	0.945	n/a	/n/a	-
1:211564958|211565318	1	211564958	211565318	5	1_2_1	17	0.37	n/a	/n/a	+
1:211952260|211966532	1	211952260	211966532	14	2_2_4	22	0.56	n/a	/n/a	-
1:211960974|211966532	1	211960974	211966532	5	2_2_0	32	0.238	n/a	/n/a	-
1:212125005|212126043	1	212125005	212126043	17	5_7_2	22	0.607	n/a	/n/a	-
1:212179981|212184763	1	212179981	212184763	14	3_0_3	57	0.329	n/a	/n/a	-
1:212179981|212190365	1	212179981	212190365	19	6_8_2	42	0.475	n/a	/n/a	-
1:212179981|212194554	1	212179981	212194554	19	4_5_4	20	0.655	n/a	/n/a	-
1:212190228|212194554	1	212190228	212194554	20	3_5_1	70	0.364	n/a	/n/a	-
1:212216335|212220759	1	212216335	212220759	17	3_4_3	43	0.442	n/a	/n/a	+
1:212218002|212220759	1	212218002	212220759	58	8_11_12	56	0.674	n/a	/n/a	+
1:212236226|212238371	1	212236226	212238371	6	0_2_2	30	0.286	n/a	/n/a	+
1:212241941|212254092	1	212241941	212254092	13	0_3_4	83	0.239	n/a	/n/a	+
1:212273594|212276294	1	212273594	212276294	10	3_4_2	40	0.333	n/a	/n/a	+
1:212480125|212506940	1	212480125	212506940	22	4_2_3	127	0.257	n/a	/n/a	+
1:212502477|212506940	1	212502477	212506940	128	15_11_15	133	0.658	n/a	/n/a	+
1:212502477|212519275	1	212502477	212519275	18	3_4_1	30	0.545	n/a	/n/a	+
1:212515530|212520748	1	212515530	212520748	10	2_2_3	102	0.164	n/a	/n/a	+
1:212957705|212960979	1	212957705	212960979	26	6_5_2	23	0.693	n/a	/n/a	-
1:213037067|213046160	1	213037067	213046160	30	9_10_2	81	0.426	n/a	/n/a	+
1:213037067|213058738	1	213037067	213058738	21	6_5_2	40	0.512	n/a	/n/a	+
1:213037067|213068696	1	213037067	213068696	7	2_3_1	30	0.318	n/a	/n/a	+
1:213046020|213058738	1	213046020	213058738	5	2_2_0	117	0.079	n/a	/n/a	+
1:213046020|213062599	1	213046020	213062599	14	5_4_1	123	0.185	n/a	/n/a	+
1:213056713|213058738	1	213056713	213058738	9	2_1_1	90	0.167	n/a	/n/a	+
1:213244348|213277911	1	213244348	213277911	5	0_1_3	85	0.105	n/a	/n/a	+
1:213244348|213290752	1	213244348	213290752	22	1_3_8	30	0.595	n/a	/n/a	+
1:213251038|213258302	1	213251038	213258302	3	2_2_0	48	0.111	n/a	/n/a	+
1:213251038|213290752	1	213251038	213290752	152	18_14_12	69	0.815	n/a	/n/a	+
1:213251038|213303232	1	213251038	213303232	6	2_1_1	100	0.107	n/a	/n/a	+
1:213290659|213303232	1	213290659	213303232	49	6_11_3	126	0.438	n/a	/n/a	+
1:213290659|213341316	1	213290659	213341316	4	2_2_0	187	0.041	n/a	/n/a	+
1:213302870|213341316	1	213302870	213341316	13	5_3_1	165	0.136	n/a	/n/a	+
1:213302870|213349835	1	213302870	213349835	15	4_4_1	88	0.254	n/a	/n/a	+
1:213341201|213349835	1	213341201	213349835	118	19_12_22	78	0.752	n/a	/n/a	+
1:213341201|213405598	1	213341201	213405598	5	3_3_0	48	0.172	n/a	/n/a	+
1:213349743|213405598	1	213349743	213405598	2	1_2_1	112	0.034	n/a	/n/a	+
1:213415912|213436159	1	213415912	213436159	19	3_3_3	43	0.469	n/a	/n/a	+
1:214478530|214488215	1	214478530	214488215	2	0_1_2	52	0.071	n/a	/n/a	+
1:214478530|214510283	1	214478530	214510283	6	0_2_2	31	0.279	n/a	/n/a	+
1:214564331|214571344	1	214564331	214571344	27	0_7_11	28	0.659	n/a	/n/a	-
1:214625148|214638300	1	214625148	214638300	37	9_6_0	37	0.667	n/a	/n/a	-
1:214637973|214638300	1	214637973	214638300	32	9_9_1	25	0.719	n/a	/n/a	-
1:215342542|215345526	1	215342542	215345526	36	9_12_4	19	0.791	n/a	/n/a	+
1:215408171|215408522	1	215408171	215408522	5	2_1_0	15	0.4	n/a	/n/a	+
1:215747129|215753342	1	215747129	215753342	8	0_2_2	38	0.296	n/a	/n/a	+
1:215749244|215752480	1	215749244	215752480	22	3_6_2	84	0.344	n/a	/n/a	+
1:215759838|215768813	1	215759838	215768813	6	0_1_2	51	0.19	n/a	/n/a	+
1:215759838|215781514	1	215759838	215781514	3	2_1_0	55	0.098	n/a	/n/a	+
1:217665022|217671737	1	217665022	217671737	4	1_0_2	19	0.296	n/a	/n/a	-
1:217783663|217787544	1	217783663	217787544	19	3_3_9	12	0.76	n/a	/n/a	-
1:219366424|219385094	1	219366424	219385094	64	13_16_2	103	0.554	n/a	/n/a	+
1:219366424|219392054	1	219366424	219392054	38	7_9_2	44	0.633	n/a	/n/a	+
1:219366424|219414650	1	219366424	219414650	12	4_5_0	32	0.429	n/a	/n/a	+
1:219383874|219392054	1	219383874	219392054	4	2_2_0	67	0.107	n/a	/n/a	+
1:220179448|220180680	1	220179448	220180680	54	13_11_5	84	0.562	n/a	/n/a	-
1:220205729|220208355	1	220205729	220208355	10	2_2_1	13	0.606	n/a	/n/a	-
1:220310151|220313631	1	220310151	220313631	13	1_1_1	53	0.329	n/a	/n/a	+
1:220330612|220332763	1	220330612	220332763	10	2_0_3	33	0.377	n/a	/n/a	-
1:220386229|220387321	1	220386229	220387321	12	4_5_3	28	0.462	n/a	/n/a	-
1:220752696|220754460	1	220752696	220754460	18	4_1_3	5	0.878	n/a	/n/a	+
1:220771673|220792097	1	220771673	220792097	13	0_2_3	16	0.619	n/a	/n/a	+
1:220935000|220936392	1	220935000	220936392	4	2_3_0	32	0.2	n/a	/n/a	+
1:220935000|220943898	1	220935000	220943898	14	5_5_0	10	0.737	n/a	/n/a	+
1:220969985|220978616	1	220969985	220978616	10	4_0_2	153	0.116	n/a	/n/a	+
1:222897434|222898897	1	222897434	222898897	28	6_8_4	13	0.812	n/a	/n/a	+
1:222997226|223008557	1	222997226	223008557	19	3_0_6	50	0.432	n/a	/n/a	+
1:223946972|223959941	1	223946972	223959941	25	4_1_6	92	0.352	n/a	/n/a	+
1:223991876|223994649	1	223991876	223994649	11	3_3_1	9	0.71	n/a	/n/a	-
1:224142179|224149975	1	224142179	224149975	40	5_8_5	19	0.808	n/a	/n/a	-
1:224418928|224438020	1	224418928	224438020	6	0_3_5	82	0.128	n/a	/n/a	-
1:224424208|224455835	1	224424208	224455835	3	1_1_3	66	0.083	n/a	/n/a	-
1:224437914|224455835	1	224437914	224455835	24	4_4_3	80	0.375	n/a	/n/a	-
1:224454706|224455835	1	224454706	224455835	48	14_8_4	46	0.676	n/a	/n/a	-
1:224553581|224559125	1	224553581	224559125	25	5_8_2	83	0.376	n/a	/n/a	+
1:224553581|224567357	1	224553581	224567357	28	10_7_3	54	0.509	n/a	/n/a	+
1:224599129|224601037	1	224599129	224601037	6	2_2_0	26	0.316	n/a	/n/a	-
1:225140372|225156576	1	225140372	225156576	53	8_9_5	68	0.609	n/a	/n/a	+
1:225140372|225161855	1	225140372	225161855	8	3_0_4	41	0.281	n/a	/n/a	+
1:225140372|225195246	1	225140372	225195246	55	12_14_8	63	0.636	n/a	/n/a	+
1:225140376|225156576	1	225140376	225156576	6	2_2_0	71	0.145	n/a	/n/a	+
1:225140376|225161855	1	225140376	225161855	3	2_1_1	44	0.12	n/a	/n/a	+
1:225161793|225195246	1	225161793	225195246	5	1_2_1	84	0.106	n/a	/n/a	+
1:225161793|225211567	1	225161793	225211567	11	2_2_1	74	0.229	n/a	/n/a	+
1:225161793|225226525	1	225161793	225226525	2	1_2_1	68	0.056	n/a	/n/a	+
1:225161793|225284941	1	225161793	225284941	13	2_2_2	80	0.245	n/a	/n/a	+
1:225190485|225211567	1	225190485	225211567	14	4_3_1	56	0.333	n/a	/n/a	+
1:225195115|225211567	1	225195115	225211567	25	5_5_1	107	0.318	n/a	/n/a	+
1:225195115|225226525	1	225195115	225226525	6	2_1_0	101	0.106	n/a	/n/a	+
1:225195115|225231491	1	225195115	225231491	3	2_0_2	74	0.075	n/a	/n/a	+
1:225195115|225239497	1	225195115	225239497	6	1_2_1	64	0.158	n/a	/n/a	+
1:225195115|225284941	1	225195115	225284941	88	16_17_3	113	0.609	n/a	/n/a	+
1:225211317|225211567	1	225211317	225211567	7	5_4_0	79	0.151	n/a	/n/a	+
1:225226396|225231685	1	225226396	225231685	4	1_1_1	40	0.167	n/a	/n/a	+
1:225226396|225239497	1	225226396	225239497	3	1_2_0	36	0.143	n/a	/n/a	+
1:225226396|225284941	1	225226396	225284941	7	1_1_3	85	0.141	n/a	/n/a	+
1:225260457|225284941	1	225260457	225284941	6	2_1_2	49	0.197	n/a	/n/a	+
1:225266909|225284941	1	225266909	225284941	10	3_2_0	56	0.263	n/a	/n/a	+
1:225270251|225284941	1	225270251	225284941	9	2_2_0	65	0.217	n/a	/n/a	+
1:225273246|225284941	1	225273246	225284941	12	3_1_0	75	0.242	n/a	/n/a	+
1:225273412|225284941	1	225273412	225284941	50	5_11_8	120	0.455	n/a	/n/a	+
1:225306922|225311316	1	225306922	225311316	21	0_4_11	23	0.646	n/a	/n/a	+
1:225332152|225373127	1	225332152	225373127	5	2_2_0	45	0.182	n/a	/n/a	+
1:225339707|225373127	1	225339707	225373127	6	2_2_1	68	0.15	n/a	/n/a	+
1:225355641|225373127	1	225355641	225373127	12	0_1_4	59	0.289	n/a	/n/a	+
1:225355641|225394922	1	225355641	225394922	4	0_1_2	38	0.174	n/a	/n/a	+
1:225372993|225380613	1	225372993	225380613	6	2_2_0	47	0.203	n/a	/n/a	+
1:225372993|225394922	1	225372993	225394922	6	1_2_2	44	0.214	n/a	/n/a	+
1:225391885|225418853	1	225391885	225418853	3	1_1_2	23	0.207	n/a	/n/a	+
1:225451899|225477784	1	225451899	225477784	8	0_1_2	10	0.615	n/a	/n/a	+
1:225600156|225603034	1	225600156	225603034	54	13_3_4	86	0.557	n/a	/n/a	-
1:225600156|225607500	1	225600156	225607500	3	2_1_1	102	0.056	n/a	/n/a	-
1:225718256|225754997	1	225718256	225754997	15	2_1_4	165	0.154	n/a	/n/a	-
1:225718256|225755116	1	225718256	225755116	65	5_16_6	92	0.586	n/a	/n/a	-
1:225742608|225755116	1	225742608	225755116	189	38_34_6	109	0.776	n/a	/n/a	-
1:225742608|225788064	1	225742608	225788064	3	2_1_1	59	0.092	n/a	/n/a	-
1:225754951|225840135	1	225754951	225840135	5	1_1_1	86	0.104	n/a	/n/a	-
1:226016426|226017235	1	226016426	226017235	6	2_2_0	68	0.15	n/a	/n/a	+
1:226016426|226019660	1	226016426	226019660	8	3_2_0	289	0.052	n/a	/n/a	+
1:226474034|226488906	1	226474034	226488906	4	2_0_2	9	0.471	n/a	/n/a	-
1:226483543|226488906	1	226483543	226488906	7	1_0_2	6	0.7	n/a	/n/a	-
1:227069589|227071620	1	227069589	227071620	10	2_2_0	130	0.133	n/a	/n/a	+
1:227149078|227153438	1	227149078	227153438	4	1_0_2	36	0.182	n/a	/n/a	+
1:227192695|227204751	1	227192695	227204751	56	11_11_4	47	0.704	n/a	/n/a	-
1:227203781|227213853	1	227203781	227213853	11	2_1_3	51	0.301	n/a	/n/a	-
1:227216358|227223308	1	227216358	227223308	4	2_1_0	7	0.533	n/a	/n/a	-
1:227227832|227235711	1	227227832	227235711	13	2_1_1	15	0.634	n/a	/n/a	-
1:227257478|227262065	1	227257478	227262065	4	2_2_0	36	0.182	n/a	/n/a	-
1:227327277|227335260	1	227327277	227335260	63	11_12_0	2	0.984	n/a	/n/a	-
1:227348244|227400920	1	227348244	227400920	11	2_2_2	18	0.55	n/a	/n/a	-
1:227381487|227387353	1	227381487	227387353	20	9_4_3	59	0.404	n/a	/n/a	-
1:227381487|227400920	1	227381487	227400920	48	9_7_6	42	0.696	n/a	/n/a	-
1:227381487|227441856	1	227381487	227441856	13	4_1_2	62	0.295	n/a	/n/a	-
1:227381487|227504947	1	227381487	227504947	15	3_4_0	50	0.375	n/a	/n/a	-
1:227935393|227935934	1	227935393	227935934	30	9_8_0	43	0.583	n/a	/n/a	+
1:227935393|227947186	1	227935393	227947186	5	1_1_2	224	0.043	n/a	/n/a	+
1:228496800|228497260	1	228496800	228497260	8	2_0_2	41	0.281	n/a	/n/a	+
1:228540652|228550456	1	228540652	228550456	4	1_2_1	4	0.667	n/a	/n/a	+
1:229422233|229439747	1	229422233	229439747	4	0_1_2	9	0.471	n/a	/n/a	+
1:229593908|229596516	1	229593908	229596516	6	2_2_0	42	0.222	n/a	/n/a	-
1:229593908|229599423	1	229593908	229599423	12	2_3_0	66	0.267	n/a	/n/a	-
1:229596358|229599423	1	229596358	229599423	6	1_3_0	64	0.158	n/a	/n/a	-
1:229599290|229601266	1	229599290	229601266	5	1_1_1	70	0.125	n/a	/n/a	-
1:229602381|229623360	1	229602381	229623360	6	2_2_0	26	0.316	n/a	/n/a	-
1:229625702|229634053	1	229625702	229634053	6	2_1_1	16	0.429	n/a	/n/a	-
1:229637746|229644014	1	229637746	229644014	10	0_1_2	19	0.513	n/a	/n/a	-
1:229675203|229678118	1	229675203	229678118	9	4_3_1	8	0.692	n/a	/n/a	-
1:230294307|230314057	1	230294307	230314057	3	1_2_1	27	0.182	n/a	/n/a	+
1:230371760|230386306	1	230371760	230386306	3	0_1_2	100	0.057	n/a	/n/a	+
1:230384930|230391090	1	230384930	230391090	9	1_3_2	117	0.133	n/a	/n/a	+
1:230398319|230401113	1	230398319	230401113	10	1_2_2	242	0.076	n/a	/n/a	+
1:230795210|230800333	1	230795210	230800333	7	2_1_1	121	0.104	n/a	/n/a	+
1:230798887|230800333	1	230798887	230800333	10	2_4_4	152	0.116	n/a	/n/a	+
1:230798887|230807386	1	230798887	230807386	30	3_6_5	73	0.451	n/a	/n/a	+
1:230798887|230810870	1	230798887	230810870	37	5_9_5	38	0.661	n/a	/n/a	+
1:230804422|230810870	1	230804422	230810870	2	2_1_0	103	0.037	n/a	/n/a	+
1:230979100|230979642	1	230979100	230979642	8	3_2_0	224	0.067	n/a	/n/a	-
1:231079552|231097049	1	231079552	231097049	79	12_12_20	35	0.819	n/a	/n/a	-
1:231081135|231097049	1	231081135	231097049	46	5_7_14	44	0.676	n/a	/n/a	-
1:231090079|231097049	1	231090079	231097049	119	14_20_35	155	0.606	n/a	/n/a	-
1:231500073|231509845	1	231500073	231509845	10	3_2_0	36	0.357	n/a	/n/a	-
1:231506308|231509845	1	231506308	231509845	73	17_15_2	37	0.798	n/a	/n/a	-
1:231672959|231678357	1	231672959	231678357	46	7_11_6	35	0.724	n/a	/n/a	+
1:231696874|231700426	1	231696874	231700426	5	1_2_0	10	0.5	n/a	/n/a	+
1:231752390|231753805	1	231752390	231753805	6	1_2_1	0	1	n/a	/n/a	+
1:232561335|232568217	1	232561335	232568217	12	3_3_1	30	0.444	n/a	/n/a	-
1:232669089|232711361	1	232669089	232711361	7	2_0_3	0	1	n/a	/n/a	-
1:233190014|233193036	1	233190014	233193036	15	6_4_1	27	0.526	n/a	/n/a	-
1:233190014|233297109	1	233190014	233297109	5	1_0_2	156	0.06	n/a	/n/a	-
1:233225807|233231609	1	233225807	233231609	17	2_2_3	16	0.68	n/a	/n/a	-
1:233296029|233314921	1	233296029	233314921	12	4_1_0	172	0.122	n/a	/n/a	-
1:233296029|233344435	1	233296029	233344435	13	3_2_1	105	0.198	n/a	/n/a	-
1:233296029|233372726	1	233296029	233372726	6	2_3_0	135	0.082	n/a	/n/a	-
1:233313548|233344435	1	233313548	233344435	11	1_3_3	61	0.265	n/a	/n/a	-
1:233334685|233344435	1	233334685	233344435	20	3_4_1	54	0.426	n/a	/n/a	-
1:233334685|233372726	1	233334685	233372726	18	3_3_5	84	0.3	n/a	/n/a	-
1:233334685|233388534	1	233334685	233388534	14	1_1_2	71	0.283	n/a	/n/a	-
1:233344264|233372726	1	233344264	233372726	19	2_3_1	59	0.392	n/a	/n/a	-
1:233344264|233388534	1	233344264	233388534	4	2_1_0	46	0.148	n/a	/n/a	-
1:233353645|233363117	1	233353645	233363117	37	4_7_6	60	0.552	n/a	/n/a	-
1:233353645|233372726	1	233353645	233372726	33	0_8_5	62	0.516	n/a	/n/a	-
1:233362972|233372726	1	233362972	233372726	9	1_2_1	64	0.22	n/a	/n/a	-
1:233372591|233388534	1	233372591	233388534	10	3_2_0	83	0.194	n/a	/n/a	-
1:233482188|233490757	1	233482188	233490757	82	22_17_2	35	0.824	n/a	/n/a	+
1:233482188|233498039	1	233482188	233498039	32	7_7_2	6	0.914	n/a	/n/a	+
1:233935680|233942868	1	233935680	233942868	12	3_4_2	19	0.558	n/a	/n/a	+
1:233942623|233957223	1	233942623	233957223	5	1_1_1	27	0.27	n/a	/n/a	+
1:233942623|233957811	1	233942623	233957811	10	0_2_1	27	0.426	n/a	/n/a	+
1:234452348|234454689	1	234452348	234454689	2	2_1_0	5	0.444	n/a	/n/a	+
1:234553830|234563512	1	234553830	234563512	13	5_4_0	3	0.897	n/a	/n/a	-
1:234586174|234608557	1	234586174	234608557	19	4_3_1	31	0.551	n/a	/n/a	-
1:234593413|234608557	1	234593413	234608557	3	1_0_2	31	0.162	n/a	/n/a	-
1:234599583|234603396	1	234599583	234603396	7	1_1_1	68	0.171	n/a	/n/a	-
1:234601402|234608557	1	234601402	234608557	8	1_1_2	49	0.246	n/a	/n/a	-
1:235403628|235409826	1	235403628	235409826	5	1_1_1	8	0.556	n/a	/n/a	-
1:235409735|235424067	1	235409735	235424067	10	1_2_4	11	0.645	n/a	/n/a	-
1:235416045|235424067	1	235416045	235424067	12	2_3_1	9	0.727	n/a	/n/a	-
1:235577748|235599155	1	235577748	235599155	4	1_2_0	46	0.148	n/a	/n/a	+
1:235582732|235597595	1	235582732	235597595	23	5_2_5	30	0.605	n/a	/n/a	+
1:235582788|235590554	1	235582788	235590554	9	0_2_3	77	0.189	n/a	/n/a	+
1:235582788|235594119	1	235582788	235594119	10	2_2_1	81	0.198	n/a	/n/a	+
1:235582788|235596486	1	235582788	235596486	5	1_1_1	24	0.294	n/a	/n/a	+
1:235582788|235597595	1	235582788	235597595	20	3_4_7	46	0.465	n/a	/n/a	+
1:235590455|235597595	1	235590455	235597595	11	3_1_3	122	0.153	n/a	/n/a	+
1:235600637|235602237	1	235600637	235602237	8	5_4_1	76	0.174	n/a	/n/a	+
1:235628953|235658138	1	235628953	235658138	6	1_2_0	48	0.2	n/a	/n/a	-
1:235634164|235647831	1	235634164	235647831	9	2_5_1	157	0.103	n/a	/n/a	-
1:235634164|235658138	1	235634164	235658138	8	3_3_0	72	0.182	n/a	/n/a	-
1:235643370|235647831	1	235643370	235647831	6	3_2_1	200	0.057	n/a	/n/a	-
1:235643370|235658138	1	235643370	235658138	60	9_13_6	119	0.502	n/a	/n/a	-
1:235643370|235659618	1	235643370	235659618	16	3_3_3	77	0.294	n/a	/n/a	-
1:235647638|235658138	1	235647638	235658138	3	2_1_1	242	0.024	n/a	/n/a	-
1:235657991|235659618	1	235657991	235659618	5	2_2_0	153	0.061	n/a	/n/a	-
1:235775424|235775806	1	235775424	235775806	5	1_2_0	0	1	n/a	/n/a	-
1:235840391|235850347	1	235840391	235850347	4	0_1_2	23	0.258	n/a	/n/a	-
1:235850249|235860572	1	235850249	235860572	2	2_2_0	7	0.364	n/a	/n/a	-
1:235963620|235964397	1	235963620	235964397	6	1_2_3	0	1	n/a	/n/a	-
1:236332006|236343328	1	236332006	236343328	13	0_5_5	48	0.351	n/a	/n/a	+
1:236332006|236347206	1	236332006	236347206	31	2_7_8	10	0.861	n/a	/n/a	+
1:236332006|236368550	1	236332006	236368550	5	0_2_2	4	0.714	n/a	/n/a	+
1:236341714|236347206	1	236341714	236347206	26	5_5_2	19	0.732	n/a	/n/a	+
1:236727798|236732424	1	236727798	236732424	5	1_1_1	4	0.714	n/a	/n/a	-
1:236966728|236969533	1	236966728	236969533	5	2_0_3	64	0.135	n/a	/n/a	+
1:236969444|236979843	1	236969444	236979843	20	3_3_6	47	0.46	n/a	/n/a	+
1:236972004|236979843	1	236972004	236979843	13	2_2_3	63	0.292	n/a	/n/a	+
1:236972004|237001899	1	236972004	237001899	5	3_2_0	54	0.156	n/a	/n/a	+
1:236987419|236990196	1	236987419	236990196	11	3_0_4	37	0.373	n/a	/n/a	+
1:236998847|237016388	1	236998847	237016388	3	2_2_0	20	0.231	n/a	/n/a	+
1:237013644|237016388	1	237013644	237016388	53	12_10_3	21	0.835	n/a	/n/a	+
1:237023133|237026854	1	237023133	237026854	23	3_4_6	8	0.852	n/a	/n/a	+
1:241669303|241672085	1	241669303	241672085	9	3_3_0	28	0.391	n/a	/n/a	-
1:241936094|241938512	1	241936094	241938512	7	1_1_1	0	1	n/a	/n/a	+
1:242029887|242030357	1	242029887	242030357	12	3_4_0	15	0.615	n/a	/n/a	+
1:242030132|242030357	1	242030132	242030357	5	1_2_0	15	0.4	n/a	/n/a	+
1:243288547|243289436	1	243288547	243289436	9	2_1_2	4	0.818	n/a	/n/a	-
1:243362362|243375266	1	243362362	243375266	15	4_3_0	7	0.811	n/a	/n/a	-
1:243385026|243388623	1	243385026	243388623	48	11_12_3	39	0.711	n/a	/n/a	-
1:243504341|243542165	1	243504341	243542165	13	3_4_1	3	0.897	n/a	/n/a	+
1:243708812|243736350	1	243708812	243736350	20	2_0_5	5	0.889	n/a	/n/a	-
1:243708812|243859018	1	243708812	243859018	5	1_2_0	12	0.455	n/a	/n/a	-
1:243776973|243828185	1	243776973	243828185	5	1_1_1	34	0.227	n/a	/n/a	-
1:244582062|244583598	1	244582062	244583598	7	3_2_1	33	0.298	n/a	/n/a	-
1:244640843|244662381	1	244640843	244662381	6	1_0_2	13	0.48	n/a	/n/a	+
1:244715624|244724447	1	244715624	244724447	15	3_3_0	1	0.968	n/a	/n/a	+
1:244723970|244724447	1	244723970	244724447	12	4_2_0	10	0.706	n/a	/n/a	+
1:245006437|245012158	1	245006437	245012158	11	0_4_4	13	0.629	n/a	/n/a	-
1:245165423|245180628	1	245165423	245180628	63	11_12_14	105	0.545	n/a	/n/a	+
1:245165423|245185598	1	245165423	245185598	27	4_5_2	28	0.659	n/a	/n/a	+
1:245165423|245222760	1	245165423	245222760	6	2_1_3	40	0.231	n/a	/n/a	+
1:245180544|245222760	1	245180544	245222760	25	5_2_10	119	0.296	n/a	/n/a	+
1:245180544|245246990	1	245180544	245246990	3	1_1_3	117	0.049	n/a	/n/a	+
1:245222688|245246990	1	245222688	245246990	18	4_2_5	20	0.643	n/a	/n/a	+
1:246078622|246078942	1	246078622	246078942	3	1_2_1	74	0.075	n/a	/n/a	-
1:246078832|246093239	1	246078832	246093239	22	4_0_8	61	0.419	n/a	/n/a	-
1:246350045|246350244	1	246350045	246350244	10	3_4_0	15	0.571	n/a	/n/a	-
1:246437607|246490639	1	246437607	246490639	6	0_1_3	142	0.078	n/a	/n/a	-
1:246490503|246493839	1	246490503	246493839	22	5_0_10	157	0.219	n/a	/n/a	-
1:246490503|246498776	1	246490503	246498776	144	30_15_17	88	0.766	n/a	/n/a	-
1:246490503|246518396	1	246490503	246518396	19	3_0_4	73	0.342	n/a	/n/a	-
1:246518333|246603426	1	246518333	246603426	17	2_2_4	65	0.343	n/a	/n/a	-
1:246599247|246603426	1	246599247	246603426	28	3_9_9	55	0.505	n/a	/n/a	-
1:246600450|246603426	1	246600450	246603426	122	9_19_27	61	0.8	n/a	/n/a	-
1:246600450|246604601	1	246600450	246604601	6	1_2_1	38	0.24	n/a	/n/a	-
1:246670356|246835919	1	246670356	246835919	21	6_4_2	9	0.824	n/a	/n/a	-
1:246719875|246720836	1	246719875	246720836	5	3_3_0	11	0.476	n/a	/n/a	-
1:246754814|246755243	1	246754814	246755243	28	13_13_0	14	0.8	n/a	/n/a	+
1:246784731|246797889	1	246784731	246797889	12	1_1_3	12	0.667	n/a	/n/a	+
1:246890194|246899357	1	246890194	246899357	7	2_2_0	104	0.119	n/a	/n/a	+
1:246890194|246903603	1	246890194	246903603	63	13_14_9	49	0.72	n/a	/n/a	+
1:246890194|246907427	1	246890194	246907427	27	5_4_9	44	0.551	n/a	/n/a	+
1:246899277|246903603	1	246899277	246903603	12	1_2_1	171	0.123	n/a	/n/a	+
1:246899277|246907427	1	246899277	246907427	9	2_0_5	171	0.095	n/a	/n/a	+
1:247302018|247323115	1	247302018	247323115	321	3_40_66	327	0.663	n/a	/n/a	-
1:247318868|247323115	1	247318868	247323115	1722	82_77_71	347	0.908	n/a	/n/a	-
1:247318868|247323169	1	247318868	247323169	14	4_3_1	40	0.412	n/a	/n/a	-
1:247319708|247323115	1	247319708	247323115	218	37_34_5	347	0.557	n/a	/n/a	-
1:247320134|247323115	1	247320134	247323115	16	5_3_2	656	0.047	n/a	/n/a	-
1:247320302|247323115	1	247320302	247323115	755	74_64_29	625	0.707	n/a	/n/a	-
1:247320302|247323169	1	247320302	247323169	12	3_4_0	314	0.071	n/a	/n/a	-
1:247320386|247323115	1	247320386	247323115	19	5_6_1	788	0.046	n/a	/n/a	-
1:247322308|247323097	1	247322308	247323097	19	1_5_7	1552	0.024	n/a	/n/a	-
1:247322308|247323115	1	247322308	247323115	186	17_36_33	1431	0.206	n/a	/n/a	-
10:196037|226068	10	196037	226068	3	2_2_0	66	0.083	n/a	/n/a	+
10:225934|243945	10	225934	243945	4	1_2_0	4	0.667	n/a	/n/a	+
10:225934|255988	10	225934	255988	23	4_4_3	32	0.59	n/a	/n/a	+
10:225934|267296	10	225934	267296	61	16_20_2	8	0.938	n/a	/n/a	+
10:355971|395394	10	355971	395394	5	1_2_0	26	0.278	n/a	/n/a	-
10:465005|468973	10	465005	468973	6	1_2_1	36	0.25	n/a	/n/a	-
10:465005|486936	10	465005	486936	4	2_2_0	97	0.076	n/a	/n/a	-
10:465005|518489	10	465005	518489	8	3_4_0	99	0.139	n/a	/n/a	-
10:468764|486936	10	468764	486936	7	2_2_0	109	0.114	n/a	/n/a	-
10:468764|518489	10	468764	518489	9	2_2_1	111	0.14	n/a	/n/a	-
10:468764|532470	10	468764	532470	10	1_1_2	70	0.222	n/a	/n/a	-
10:486811|518489	10	486811	518489	29	10_8_4	120	0.326	n/a	/n/a	-
10:486811|532470	10	486811	532470	83	16_8_11	79	0.678	n/a	/n/a	-
10:518379|532470	10	518379	532470	47	6_4_14	152	0.382	n/a	/n/a	-
10:530721|532470	10	530721	532470	91	14_8_18	78	0.7	n/a	/n/a	-
10:882343|890995	10	882343	890995	7	1_4_4	20	0.412	n/a	/n/a	-
10:909683|910210	10	909683	910210	68	12_10_5	126	0.519	n/a	/n/a	-
10:909683|931700	10	909683	931700	60	17_10_7	47	0.719	n/a	/n/a	-
10:930387|936769	10	930387	936769	4	0_3_3	89	0.082	n/a	/n/a	-
10:1046617|1053068	10	1046617	1053068	6	1_3_2	18	0.4	n/a	/n/a	+
10:1118056|1126416	10	1118056	1126416	5	1_0_3	15	0.4	n/a	/n/a	+
10:1125951|1126416	10	1125951	1126416	19	2_4_4	26	0.594	n/a	/n/a	+
10:1130343|1142186	10	1130343	1142186	115	14_2_26	51	0.819	n/a	/n/a	+
10:1130343|1151207	10	1130343	1151207	11	2_2_0	11	0.667	n/a	/n/a	+
10:1130343|1170964	10	1130343	1170964	5	2_1_0	10	0.5	n/a	/n/a	+
10:3143557|3151672	10	3143557	3151672	5	1_1_1	123	0.075	n/a	/n/a	+
10:3160974|3162236	10	3160974	3162236	10	0_1_3	110	0.154	n/a	/n/a	+
10:3172011|3178030	10	3172011	3178030	5	1_2_0	75	0.118	n/a	/n/a	+
10:5751493|5754881	10	5751493	5754881	8	1_0_2	27	0.372	n/a	/n/a	+
10:5751493|5756170	10	5751493	5756170	28	4_2_9	9	0.862	n/a	/n/a	+
10:5815805|5828013	10	5815805	5828013	16	3_3_1	126	0.203	n/a	/n/a	-
10:5815805|5842668	10	5815805	5842668	114	16_12_10	33	0.874	n/a	/n/a	-
10:5827105|5842668	10	5827105	5842668	165	29_24_9	58	0.851	n/a	/n/a	-
10:5827815|5842668	10	5827815	5842668	11	3_3_2	87	0.202	n/a	/n/a	-
10:5836848|5842668	10	5836848	5842668	73	17_9_5	122	0.545	n/a	/n/a	-
10:6854212|6879970	10	6854212	6879970	4	2_0_2	27	0.229	n/a	/n/a	+
10:6863749|6879970	10	6863749	6879970	14	2_0_3	22	0.56	n/a	/n/a	+
10:6875605|6880164	10	6875605	6880164	9	0_4_6	10	0.643	n/a	/n/a	+
10:7230586|7247890	10	7230586	7247890	8	1_1_1	10	0.615	n/a	/n/a	-
10:7230586|7327916	10	7230586	7327916	5	2_1_1	64	0.135	n/a	/n/a	-
10:7239510|7247890	10	7239510	7247890	6	2_2_0	18	0.4	n/a	/n/a	-
10:7262373|7269899	10	7262373	7269899	29	7_3_9	56	0.509	n/a	/n/a	-
10:7262373|7318951	10	7262373	7318951	20	4_2_2	180	0.182	n/a	/n/a	-
10:7262373|7327916	10	7262373	7327916	23	3_4_6	64	0.418	n/a	/n/a	-
10:7269817|7327916	10	7269817	7327916	7	3_1_2	144	0.089	n/a	/n/a	-
10:7285520|7290611	10	7285520	7290611	10	4_3_1	186	0.097	n/a	/n/a	-
10:7285520|7318951	10	7285520	7318951	13	3_4_2	228	0.102	n/a	/n/a	-
10:7285520|7327916	10	7285520	7327916	184	37_24_17	112	0.767	n/a	/n/a	-
10:7290510|7327916	10	7290510	7327916	30	4_3_4	216	0.217	n/a	/n/a	-
10:7318854|7327916	10	7318854	7327916	643	40_39_63	248	0.838	n/a	/n/a	-
10:7839010|7844817	10	7839010	7844817	27	6_4_4	20	0.73	n/a	/n/a	+
10:11526970|11527910	10	11526970	11527910	5	1_2_0	51	0.164	n/a	/n/a	-
10:11639630|11643979	10	11639630	11643979	6	1_1_1	1	0.923	n/a	/n/a	-
10:11789348|11797607	10	11789348	11797607	19	3_3_3	34	0.528	n/a	/n/a	+
10:11893996|11894214	10	11893996	11894214	80	17_17_5	114	0.584	n/a	/n/a	+
10:12039671|12056183	10	12039671	12056183	17	2_5_5	13	0.723	n/a	/n/a	-
10:12123471|12126750	10	12123471	12126750	22	7_6_3	84	0.344	n/a	/n/a	+
10:12123471|12133683	10	12123471	12133683	15	5_3_0	40	0.429	n/a	/n/a	+
10:12123471|12136270	10	12123471	12136270	8	4_5_0	26	0.381	n/a	/n/a	+
10:12130985|12133683	10	12130985	12133683	5	1_2_0	70	0.125	n/a	/n/a	+
10:12148245|12150014	10	12148245	12150014	13	2_1_2	43	0.377	n/a	/n/a	+
10:12160748|12162266	10	12160748	12162266	15	4_3_0	95	0.24	n/a	/n/a	+
10:12251966|12259466	10	12251966	12259466	7	1_2_2	236	0.056	n/a	/n/a	+
10:12257739|12277122	10	12257739	12277122	5	2_1_1	349	0.028	n/a	/n/a	+
10:12257739|12280484	10	12257739	12280484	58	9_1_16	183	0.388	n/a	/n/a	+
10:12272947|12280484	10	12272947	12280484	47	2_0_17	291	0.244	n/a	/n/a	+
10:12277047|12280484	10	12277047	12280484	17	6_0_3	371	0.084	n/a	/n/a	+
10:12288148|12292468	10	12288148	12292468	9	2_3_0	179	0.091	n/a	/n/a	+
10:12291580|12292468	10	12291580	12292468	8	2_4_0	145	0.099	n/a	/n/a	+
10:12431870|12445368	10	12431870	12445368	7	1_1_1	23	0.378	n/a	/n/a	+
10:12439268|12445368	10	12439268	12445368	11	1_5_2	23	0.489	n/a	/n/a	+
10:12442015|12445368	10	12442015	12445368	116	18_22_0	26	0.899	n/a	/n/a	+
10:12442720|12445368	10	12442720	12445368	57	15_11_0	96	0.543	n/a	/n/a	+
10:12445101|12445368	10	12445101	12445368	7	1_2_0	150	0.085	n/a	/n/a	+
10:12595224|12651112	10	12595224	12651112	4	2_1_0	22	0.267	n/a	/n/a	+
10:12595224|12708809	10	12595224	12708809	4	1_2_0	41	0.163	n/a	/n/a	+
10:12802947|12811798	10	12802947	12811798	11	4_4_0	30	0.423	n/a	/n/a	+
10:12833157|12858327	10	12833157	12858327	10	1_2_4	27	0.426	n/a	/n/a	+
10:12856194|12858327	10	12856194	12858327	22	4_2_3	39	0.53	n/a	/n/a	+
10:13214376|13214765	10	13214376	13214765	9	1_1_2	9	0.667	n/a	/n/a	+
10:13233299|13234568	10	13233299	13234568	11	2_3_1	24	0.478	n/a	/n/a	+
10:13333831|13337606	10	13333831	13337606	11	1_2_4	682	0.031	n/a	/n/a	-
10:14867478|14870271	10	14867478	14870271	8	3_3_0	5	0.762	n/a	/n/a	-
10:15317854|15326104	10	15317854	15326104	20	3_4_2	19	0.678	n/a	/n/a	-
10:15838099|15889942	10	15838099	15889942	24	1_4_7	9	0.842	n/a	/n/a	-
10:15858834|15885271	10	15858834	15885271	9	4_1_3	102	0.15	n/a	/n/a	-
10:15858834|15889942	10	15858834	15889942	97	3_9_24	43	0.819	n/a	/n/a	-
10:15863655|15885271	10	15863655	15885271	8	0_2_2	109	0.128	n/a	/n/a	-
10:15863655|15889942	10	15863655	15889942	20	0_1_7	50	0.444	n/a	/n/a	-
10:15875629|15889942	10	15875629	15889942	116	3_10_21	60	0.795	n/a	/n/a	-
10:15879203|15889942	10	15879203	15889942	10	3_3_0	244	0.076	n/a	/n/a	-
10:16528351|16528616	10	16528351	16528616	7	1_2_0	13	0.519	n/a	/n/a	+
10:16547019|16554221	10	16547019	16554221	6	2_1_0	6	0.667	n/a	/n/a	+
10:16794538|16806509	10	16794538	16806509	23	5_2_4	33	0.582	n/a	/n/a	-
10:16794538|16824083	10	16794538	16824083	9	1_0_3	31	0.367	n/a	/n/a	-
10:17199440|17210916	10	17199440	17210916	13	3_3_0	4	0.867	n/a	/n/a	-
10:17632345|17646046	10	17632345	17646046	7	2_3_1	23	0.378	n/a	/n/a	-
10:17636204|17646046	10	17636204	17646046	3	2_2_0	18	0.25	n/a	/n/a	-
10:17645559|17646046	10	17645559	17646046	31	10_9_5	28	0.689	n/a	/n/a	-
10:17722899|17726926	10	17722899	17726926	3	2_0_2	3	0.667	n/a	/n/a	+
10:17746430|17747740	10	17746430	17747740	7	2_2_1	35	0.286	n/a	/n/a	+
10:18898774|18905222	10	18898774	18905222	2	1_2_0	21	0.16	n/a	/n/a	-
10:18955504|18957606	10	18955504	18957606	17	1_5_4	29	0.54	n/a	/n/a	+
10:20432224|20466338	10	20432224	20466338	5	2_1_1	11	0.476	n/a	/n/a	+
10:21903760|21940697	10	21903760	21940697	2	1_1_2	36	0.1	n/a	/n/a	+
10:21957846|21959633	10	21957846	21959633	12	0_3_1	12	0.667	n/a	/n/a	+
10:21957846|22015284	10	21957846	22015284	4	1_2_0	28	0.222	n/a	/n/a	+
10:21970261|22002879	10	21970261	22002879	23	2_7_5	52	0.469	n/a	/n/a	+
10:21970261|22016857	10	21970261	22016857	7	0_1_3	17	0.452	n/a	/n/a	+
10:21977420|22016857	10	21977420	22016857	4	1_1_2	15	0.348	n/a	/n/a	+
10:22002701|22016857	10	22002701	22016857	37	8_3_5	29	0.718	n/a	/n/a	+
10:24918925|24924032	10	24918925	24924032	23	4_6_2	23	0.667	n/a	/n/a	-
10:24922331|24924032	10	24922331	24924032	2	2_0_1	21	0.16	n/a	/n/a	-
10:25226113|25231365	10	25226113	25231365	37	11_9_3	25	0.747	n/a	/n/a	-
10:27054147|27059274	10	27054147	27059274	7	0_1_2	30	0.318	n/a	/n/a	-
10:27328894|27332496	10	27328894	27332496	13	5_5_0	0	1	n/a	/n/a	-
10:27356086|27375538	10	27356086	27375538	9	2_1_2	6	0.75	n/a	/n/a	-
10:27382278|27387255	10	27382278	27387255	9	2_3_0	8	0.692	n/a	/n/a	-
10:27420788|27425314	10	27420788	27425314	17	4_3_3	23	0.596	n/a	/n/a	-
10:27431316|27434519	10	27431316	27434519	51	9_11_6	64	0.614	n/a	/n/a	-
10:27447478|27448687	10	27447478	27448687	9	3_2_0	20	0.474	n/a	/n/a	+
10:27447478|27450111	10	27447478	27450111	6	3_1_1	12	0.5	n/a	/n/a	+
10:27447478|27454468	10	27447478	27454468	3	2_2_0	17	0.261	n/a	/n/a	+
10:27453993|27454468	10	27453993	27454468	28	3_5_4	22	0.718	n/a	/n/a	+
10:27469882|27470510	10	27469882	27470510	14	4_4_4	8	0.778	n/a	/n/a	+
10:27815757|27822923	10	27815757	27822923	3	1_1_2	20	0.231	n/a	/n/a	+
10:27821436|27822923	10	27821436	27822923	35	4_1_8	20	0.778	n/a	/n/a	+
10:27855761|27867642	10	27855761	27867642	10	1_1_1	3	0.87	n/a	/n/a	+
10:28023385|28024303	10	28023385	28024303	7	3_3_0	6	0.7	n/a	/n/a	-
10:28023385|28032426	10	28023385	28032426	4	2_1_0	58	0.121	n/a	/n/a	-
10:28223939|28225809	10	28223939	28225809	36	9_3_1	33	0.686	n/a	/n/a	-
10:28223939|28233891	10	28223939	28233891	6	1_1_1	10	0.545	n/a	/n/a	-
10:28223939|28260242	10	28223939	28260242	4	2_2_0	15	0.348	n/a	/n/a	-
10:28358701|28378770	10	28358701	28378770	12	5_7_3	7	0.774	n/a	/n/a	-
10:28408580|28409597	10	28408580	28409597	6	1_1_2	4	0.75	n/a	/n/a	-
10:28420489|28438988	10	28420489	28438988	10	3_0_2	9	0.69	n/a	/n/a	-
10:28872328|28879761	10	28872328	28879761	60	13_15_11	45	0.727	n/a	/n/a	+
10:28878665|28897360	10	28878665	28897360	5	1_2_0	66	0.132	n/a	/n/a	+
10:28903496|28905291	10	28903496	28905291	3	1_1_2	65	0.085	n/a	/n/a	+
10:30736711|30740673	10	30736711	30740673	3	2_2_0	19	0.24	n/a	/n/a	+
10:30739187|30739448	10	30739187	30739448	13	6_5_0	31	0.456	n/a	/n/a	+
10:30739187|30740673	10	30739187	30740673	9	5_2_1	23	0.439	n/a	/n/a	+
10:31165927|31230580	10	31165927	31230580	9	0_1_2	20	0.474	n/a	/n/a	-
10:31165927|31273355	10	31165927	31273355	5	1_1_3	1	0.909	n/a	/n/a	-
10:31230504|31273355	10	31230504	31273355	7	1_1_2	31	0.311	n/a	/n/a	-
10:31230504|31306011	10	31230504	31306011	12	1_2_2	30	0.444	n/a	/n/a	-
10:31644073|31647262	10	31644073	31647262	16	1_4_6	10	0.762	n/a	/n/a	+
10:31644073|31676195	10	31644073	31676195	9	0_3_2	31	0.367	n/a	/n/a	+
10:31644076|31647262	10	31644076	31647262	25	1_3_2	10	0.833	n/a	/n/a	+
10:31661947|31676727	10	31661947	31676727	16	5_1_2	5	0.865	n/a	/n/a	+
10:32197100|32199491	10	32197100	32199491	452	56_7_104	148	0.859	n/a	/n/a	-
10:32309950|32310215	10	32309950	32310215	12	3_0_3	5	0.828	n/a	/n/a	-
10:32745179|32762951	10	32745179	32762951	4	1_0_2	33	0.195	n/a	/n/a	+
10:32758313|32762951	10	32758313	32762951	4	2_0_2	27	0.229	n/a	/n/a	+
10:32759992|32762951	10	32759992	32762951	29	7_1_6	28	0.674	n/a	/n/a	+
10:34558585|34558827	10	34558585	34558827	4	1_1_1	20	0.286	n/a	/n/a	-
10:34558585|34573173	10	34558585	34573173	25	5_3_3	11	0.82	n/a	/n/a	-
10:34648075|34649187	10	34648075	34649187	11	3_3_0	13	0.629	n/a	/n/a	-
10:34739245|34759191	10	34739245	34759191	4	2_2_0	43	0.157	n/a	/n/a	-
10:34759013|34806087	10	34759013	34806087	7	1_2_0	48	0.226	n/a	/n/a	-
10:34805907|34985347	10	34805907	34985347	5	2_2_1	34	0.227	n/a	/n/a	-
10:34985246|34989132	10	34985246	34989132	19	1_5_1	27	0.585	n/a	/n/a	-
10:35105048|35105524	10	35105048	35105524	6	2_1_0	1	0.923	n/a	/n/a	+
10:35349802|35360267	10	35349802	35360267	44	8_7_3	7	0.926	n/a	/n/a	-
10:35437296|35441308	10	35437296	35441308	13	1_1_1	10	0.722	n/a	/n/a	+
10:35772332|35790463	10	35772332	35790463	11	4_1_5	41	0.349	n/a	/n/a	+
10:35772332|35805551	10	35772332	35805551	10	1_2_1	54	0.27	n/a	/n/a	+
10:35805451|35819171	10	35805451	35819171	31	4_6_5	112	0.356	n/a	/n/a	+
10:35805451|35842113	10	35805451	35842113	9	2_2_0	121	0.129	n/a	/n/a	+
10:43109730|43132420	10	43109730	43132420	4	1_1_2	3	0.727	n/a	/n/a	-
10:43127377|43132420	10	43127377	43132420	8	2_1_3	5	0.762	n/a	/n/a	-
10:43287075|43289439	10	43287075	43289439	3	1_1_1	11	0.353	n/a	/n/a	+
10:43654163|43662546	10	43654163	43662546	4	2_2_0	0	1	n/a	/n/a	+
10:43654163|43671480	10	43654163	43671480	10	3_1_2	0	1	n/a	/n/a	+
10:43659314|43671480	10	43659314	43671480	6	2_2_1	13	0.48	n/a	/n/a	+
10:45954568|45959775	10	45954568	45959775	5	1_1_1	19	0.345	n/a	/n/a	-
10:46121399|46122553	10	46121399	46122553	15	3_3_0	0	1	n/a	/n/a	-
10:46135264|46159290	10	46135264	46159290	7	1_2_3	32	0.304	n/a	/n/a	-
10:46158028|46159290	10	46158028	46159290	33	6_7_3	28	0.702	n/a	/n/a	-
10:46158990|46159290	10	46158990	46159290	82	21_22_1	58	0.739	n/a	/n/a	-
10:47072857|47076426	10	47072857	47076426	6	2_3_0	15	0.444	n/a	/n/a	-
10:47099291|47099714	10	47099291	47099714	10	2_3_0	29	0.408	n/a	/n/a	-
10:47121121|47122969	10	47121121	47122969	10	2_2_1	25	0.444	n/a	/n/a	-
10:47121121|47122996	10	47121121	47122996	15	4_3_3	25	0.545	n/a	/n/a	-
10:49533940|49618211	10	49533940	49618211	4	2_2_1	91	0.081	n/a	/n/a	+
10:49572655|49613024	10	49572655	49613024	8	1_3_4	283	0.054	n/a	/n/a	+
10:49609655|49613024	10	49609655	49613024	33	7_9_2	310	0.176	n/a	/n/a	+
10:49609655|49618211	10	49609655	49618211	108	24_22_3	120	0.643	n/a	/n/a	+
10:49609655|49628363	10	49609655	49628363	9	2_1_0	54	0.25	n/a	/n/a	+
10:50701163|50714058	10	50701163	50714058	21	4_5_0	13	0.764	n/a	/n/a	-
10:51040849|51051678	10	51040849	51051678	18	3_4_5	38	0.486	n/a	/n/a	-
10:51040849|51069709	10	51040849	51069709	5	2_1_0	27	0.27	n/a	/n/a	-
10:51579128|51581378	10	51579128	51581378	11	1_1_3	47	0.319	n/a	/n/a	+
10:52066604|52071175	10	52066604	52071175	14	1_4_2	16	0.636	n/a	/n/a	-
10:52100147|52104105	10	52100147	52104105	16	1_4_3	13	0.711	n/a	/n/a	-
10:52103252|52104105	10	52103252	52104105	21	6_6_0	40	0.512	n/a	/n/a	-
10:52193236|52220574	10	52193236	52220574	6	2_3_1	119	0.092	n/a	/n/a	-
10:52193236|52226692	10	52193236	52226692	17	2_0_6	78	0.304	n/a	/n/a	-
10:52193236|52350007	10	52193236	52350007	82	12_17_20	32	0.837	n/a	/n/a	-
10:52220433|52350007	10	52220433	52350007	28	7_5_3	86	0.394	n/a	/n/a	-
10:52279591|52350007	10	52279591	52350007	6	2_1_0	134	0.082	n/a	/n/a	-
10:52279591|52358583	10	52279591	52358583	7	1_1_3	119	0.105	n/a	/n/a	-
10:60035878|60048163	10	60035878	60048163	10	1_2_0	2	0.909	n/a	/n/a	+
10:60036877|60048163	10	60036877	60048163	6	1_1_1	17	0.414	n/a	/n/a	+
10:60347975|60380661	10	60347975	60380661	4	1_1_1	14	0.364	n/a	/n/a	+
10:60374053|60380661	10	60374053	60380661	5	1_0_5	17	0.37	n/a	/n/a	+
10:60549022|60553375	10	60549022	60553375	15	4_5_1	42	0.417	n/a	/n/a	+
10:61564178|61574513	10	61564178	61574513	5	1_0_2	61	0.141	n/a	/n/a	-
10:61572393|61612460	10	61572393	61612460	7	2_3_0	41	0.255	n/a	/n/a	-
10:61592283|61612460	10	61592283	61612460	39	6_3_4	73	0.517	n/a	/n/a	-
10:63674932|63760080	10	63674932	63760080	8	2_1_0	7	0.696	n/a	/n/a	+
10:63699942|63760080	10	63699942	63760080	5	2_2_0	27	0.27	n/a	/n/a	+
10:63759850|63760080	10	63759850	63760080	4	2_2_0	34	0.19	n/a	/n/a	+
10:63810647|63819054	10	63810647	63819054	13	1_0_4	8	0.765	n/a	/n/a	+
10:63810647|63829556	10	63810647	63829556	3	1_1_1	8	0.429	n/a	/n/a	+
10:63907594|63908825	10	63907594	63908825	9	2_0_2	0	1	n/a	/n/a	-
10:64148155|64159552	10	64148155	64159552	7	2_1_0	2	0.875	n/a	/n/a	+
10:64148155|64219556	10	64148155	64219556	9	3_0_4	0	1	n/a	/n/a	+
10:64948928|64949206	10	64948928	64949206	11	4_3_0	15	0.595	n/a	/n/a	-
10:64976967|64979743	10	64976967	64979743	13	2_2_2	4	0.867	n/a	/n/a	-
10:65140078|65140242	10	65140078	65140242	23	8_5_1	89	0.341	n/a	/n/a	-
10:65140078|65169748	10	65140078	65169748	22	8_7_1	21	0.677	n/a	/n/a	-
10:65140078|65214849	10	65140078	65214849	56	11_12_5	22	0.836	n/a	/n/a	-
10:67345423|67528220	10	67345423	67528220	3	1_2_0	2	0.75	n/a	/n/a	+
10:69647175|69648881	10	69647175	69648881	10	2_2_3	61	0.247	n/a	/n/a	+
10:69647175|69651312	10	69647175	69651312	10	3_3_3	34	0.37	n/a	/n/a	+
10:69648640|69651312	10	69648640	69651312	5	2_3_1	27	0.27	n/a	/n/a	+
10:69714352|69773943	10	69714352	69773943	19	6_5_1	55	0.409	n/a	/n/a	-
10:69726440|69752439	10	69726440	69752439	28	7_5_4	243	0.187	n/a	/n/a	-
10:69726440|69773943	10	69726440	69773943	74	20_18_3	94	0.612	n/a	/n/a	-
10:69748420|69752439	10	69748420	69752439	4	1_0_2	329	0.024	n/a	/n/a	-
10:69748420|69773943	10	69748420	69773943	56	12_15_1	182	0.381	n/a	/n/a	-
10:69750661|69773943	10	69750661	69773943	3	1_2_1	127	0.045	n/a	/n/a	-
10:69751956|69773943	10	69751956	69773943	40	11_10_0	125	0.39	n/a	/n/a	-
10:69785303|69804315	10	69785303	69804315	7	3_3_0	25	0.359	n/a	/n/a	-
10:69785303|69804320	10	69785303	69804320	42	10_9_2	23	0.785	n/a	/n/a	-
10:69785303|69826974	10	69785303	69826974	12	4_4_0	10	0.706	n/a	/n/a	-
10:69792535|69826974	10	69792535	69826974	8	1_2_1	54	0.229	n/a	/n/a	-
10:69797850|69804320	10	69797850	69804320	13	2_3_4	64	0.289	n/a	/n/a	-
10:69797850|69826974	10	69797850	69826974	11	3_4_2	51	0.301	n/a	/n/a	-
10:69873990|69882097	10	69873990	69882097	2	1_2_1	42	0.087	n/a	/n/a	+
10:69881195|69882097	10	69881195	69882097	10	1_2_0	41	0.328	n/a	/n/a	+
10:69902697|69909868	10	69902697	69909868	74	17_11_15	63	0.701	n/a	/n/a	+
10:69902697|69918384	10	69902697	69918384	11	3_2_0	61	0.265	n/a	/n/a	+
10:69961586|69966660	10	69961586	69966660	5	2_4_0	64	0.135	n/a	/n/a	+
10:69966527|69970304	10	69966527	69970304	19	3_4_0	36	0.514	n/a	/n/a	+
10:70152895|70154208	10	70152895	70154208	41	6_9_9	22	0.788	n/a	/n/a	-
10:70153832|70154208	10	70153832	70154208	12	0_4_1	29	0.453	n/a	/n/a	-
10:70156537|70164601	10	70156537	70164601	4	2_2_0	24	0.25	n/a	/n/a	-
10:70178791|70179649	10	70178791	70179649	5	2_1_1	0	1	n/a	/n/a	-
10:70190193|70190417	10	70190193	70190417	17	6_3_0	20	0.63	n/a	/n/a	-
10:70202674|70206170	10	70202674	70206170	5	1_1_1	42	0.192	n/a	/n/a	-
10:70202674|70229920	10	70202674	70229920	5	2_2_0	97	0.093	n/a	/n/a	-
10:70209785|70225569	10	70209785	70225569	2	1_1_1	154	0.025	n/a	/n/a	-
10:70209785|70229920	10	70209785	70229920	13	3_2_0	92	0.22	n/a	/n/a	-
10:70218496|70229920	10	70218496	70229920	4	1_2_0	76	0.095	n/a	/n/a	-
10:70218861|70229920	10	70218861	70229920	180	29_34_4	111	0.764	n/a	/n/a	-
10:70227880|70229920	10	70227880	70229920	416	54_54_21	288	0.743	n/a	/n/a	-
10:70243177|70248386	10	70243177	70248386	5	2_1_0	55	0.154	n/a	/n/a	-
10:70246901|70253327	10	70246901	70253327	22	3_4_3	135	0.246	n/a	/n/a	-
10:70246901|70263452	10	70246901	70263452	9	0_1_3	115	0.135	n/a	/n/a	-
10:70246901|70266475	10	70246901	70266475	5	2_3_0	49	0.169	n/a	/n/a	-
10:70246901|70276600	10	70246901	70276600	16	3_1_5	49	0.395	n/a	/n/a	-
10:70482212|70497646	10	70482212	70497646	6	1_1_1	14	0.462	n/a	/n/a	+
10:70497602|70502326	10	70497602	70502326	15	0_1_3	31	0.492	n/a	/n/a	+
10:70545893|70546449	10	70545893	70546449	30	4_10_2	37	0.619	n/a	/n/a	+
10:70549467|70549672	10	70549467	70549672	7	1_2_0	18	0.438	n/a	/n/a	+
10:70666467|70670138	10	70666467	70670138	7	2_2_1	5	0.737	n/a	/n/a	+
10:70696692|70703013	10	70696692	70703013	5	3_2_1	5	0.667	n/a	/n/a	+
10:70706108|70706476	10	70706108	70706476	3	2_2_0	8	0.429	n/a	/n/a	+
10:70723047|70725250	10	70723047	70725250	5	2_2_0	132	0.07	n/a	/n/a	+
10:70723047|70726959	10	70723047	70726959	31	8_10_2	104	0.373	n/a	/n/a	+
10:70725133|70726959	10	70725133	70726959	9	2_3_0	103	0.149	n/a	/n/a	+
10:70726774|70728877	10	70726774	70728877	6	2_1_0	91	0.117	n/a	/n/a	+
10:70733301|70741337	10	70733301	70741337	10	3_0_3	60	0.25	n/a	/n/a	+
10:70915568|70917967	10	70915568	70917967	20	4_5_1	10	0.8	n/a	/n/a	+
10:70945743|70949191	10	70945743	70949191	4	2_2_0	24	0.25	n/a	/n/a	+
10:70945743|70951522	10	70945743	70951522	14	2_3_2	12	0.7	n/a	/n/a	+
10:70954944|70962799	10	70954944	70962799	2	2_2_0	58	0.065	n/a	/n/a	+
10:71243447|71258152	10	71243447	71258152	5	2_1_0	114	0.081	n/a	/n/a	+
10:71815527|71815728	10	71815527	71815728	5	2_2_0	9	0.526	n/a	/n/a	-
10:71913594|71921687	10	71913594	71921687	8	2_1_1	38	0.296	n/a	/n/a	-
10:71964629|71969441	10	71964629	71969441	3	0_2_1	14	0.3	n/a	/n/a	-
10:71977568|71978573	10	71977568	71978573	10	3_1_3	4	0.833	n/a	/n/a	-
10:72099752|72100458	10	72099752	72100458	15	1_3_3	60	0.333	n/a	/n/a	-
10:72604230|72610967	10	72604230	72610967	37	5_1_10	113	0.396	n/a	/n/a	+
10:72604230|72619256	10	72604230	72619256	33	7_8_2	103	0.391	n/a	/n/a	+
10:72604230|72628190	10	72604230	72628190	6	2_2_0	91	0.117	n/a	/n/a	+
10:73737449|73737907	10	73737449	73737907	2	2_1_0	15	0.211	n/a	/n/a	+
10:73887840|73892939	10	73887840	73892939	15	2_4_2	112	0.211	n/a	/n/a	-
10:73887840|73912746	10	73887840	73912746	25	1_4_3	79	0.388	n/a	/n/a	-
10:73956569|73963282	10	73956569	73963282	23	7_6_0	66	0.411	n/a	/n/a	-
10:73956569|73970589	10	73956569	73970589	9	2_2_0	97	0.157	n/a	/n/a	-
10:73956569|73973089	10	73956569	73973089	20	4_4_1	74	0.351	n/a	/n/a	-
10:73970490|73973089	10	73970490	73973089	7	2_2_1	89	0.136	n/a	/n/a	-
10:73983646|73990198	10	73983646	73990198	6	2_0_1	225	0.051	n/a	/n/a	+
10:74100547|74100928	10	74100547	74100928	51	3_9_11	61	0.626	n/a	/n/a	-
10:74293504|74322821	10	74293504	74322821	13	1_3_5	53	0.329	n/a	/n/a	-
10:74310937|74322821	10	74310937	74322821	3	1_2_0	54	0.1	n/a	/n/a	-
10:74310937|74326552	10	74310937	74326552	6	2_1_0	35	0.255	n/a	/n/a	-
10:74468041|74475660	10	74468041	74475660	204	22_19_51	103	0.798	n/a	/n/a	+
10:74468041|74496329	10	74468041	74496329	9	2_1_2	39	0.316	n/a	/n/a	+
10:74468041|74501603	10	74468041	74501603	24	6_8_1	48	0.5	n/a	/n/a	+
10:74468041|74550089	10	74468041	74550089	8	1_2_1	27	0.372	n/a	/n/a	+
10:74474869|74475660	10	74474869	74475660	162	24_31_14	256	0.559	n/a	/n/a	+
10:74474869|74501603	10	74474869	74501603	6	1_1_1	207	0.055	n/a	/n/a	+
10:74474869|74502031	10	74474869	74502031	8	2_1_3	197	0.075	n/a	/n/a	+
10:74475520|74502031	10	74475520	74502031	4	2_1_1	74	0.098	n/a	/n/a	+
10:74496243|74550689	10	74496243	74550689	3	0_1_2	23	0.207	n/a	/n/a	+
10:74501480|74502031	10	74501480	74502031	62	9_10_9	43	0.743	n/a	/n/a	+
10:74549934|74594186	10	74549934	74594186	8	2_3_1	20	0.444	n/a	/n/a	+
10:74628461|74631338	10	74628461	74631338	10	4_5_0	70	0.222	n/a	/n/a	+
10:74770727|74790128	10	74770727	74790128	3	1_1_1	31	0.162	n/a	/n/a	-
10:74934445|74937731	10	74934445	74937731	4	0_1_2	42	0.16	n/a	/n/a	+
10:74934445|74953351	10	74934445	74953351	4	1_2_1	5	0.615	n/a	/n/a	+
10:74934445|74953367	10	74934445	74953367	14	2_3_2	5	0.848	n/a	/n/a	+
10:74952314|74953351	10	74952314	74953351	6	3_3_0	37	0.245	n/a	/n/a	+
10:75095188|75101339	10	75095188	75101339	12	2_3_0	9	0.727	n/a	/n/a	-
10:75095188|75105002	10	75095188	75105002	7	0_2_1	7	0.667	n/a	/n/a	-
10:75142933|75143448	10	75142933	75143448	5	2_2_0	145	0.065	n/a	/n/a	-
10:75156277|75160615	10	75156277	75160615	16	2_1_4	55	0.368	n/a	/n/a	-
10:75157939|75160615	10	75157939	75160615	5	2_1_1	90	0.1	n/a	/n/a	-
10:75264608|75265184	10	75264608	75265184	2	1_1_2	12	0.25	n/a	/n/a	-
10:75296027|75299351	10	75296027	75299351	8	2_3_1	12	0.571	n/a	/n/a	-
10:75331179|75336119	10	75331179	75336119	9	1_2_3	23	0.439	n/a	/n/a	-
10:75451801|75473090	10	75451801	75473090	10	0_2_1	8	0.714	n/a	/n/a	-
10:75464744|75481262	10	75464744	75481262	7	1_2_1	15	0.483	n/a	/n/a	-
10:75472962|75481262	10	75472962	75481262	6	3_3_0	28	0.3	n/a	/n/a	-
10:75482147|75488345	10	75482147	75488345	6	2_2_0	16	0.429	n/a	/n/a	-
10:75506388|75506762	10	75506388	75506762	19	3_3_2	118	0.244	n/a	/n/a	+
10:75576781|75583842	10	75576781	75583842	19	4_2_7	149	0.203	n/a	/n/a	-
10:75579290|75583842	10	75579290	75583842	11	4_1_5	124	0.151	n/a	/n/a	-
10:75848954|75984349	10	75848954	75984349	30	3_2_4	86	0.411	n/a	/n/a	+
10:75888866|75896561	10	75888866	75896561	4	2_1_0	47	0.145	n/a	/n/a	-
10:75896390|75898140	10	75896390	75898140	5	1_2_0	67	0.13	n/a	/n/a	-
10:76002496|76074503	10	76002496	76074503	16	5_0_4	88	0.267	n/a	/n/a	+
10:76002496|76158337	10	76002496	76158337	9	3_2_1	69	0.207	n/a	/n/a	+
10:76074425|76158337	10	76074425	76158337	78	9_19_16	125	0.555	n/a	/n/a	+
10:76153899|76158337	10	76153899	76158337	6	2_3_3	125	0.088	n/a	/n/a	+
10:76153899|76285184	10	76153899	76285184	7	2_2_0	115	0.109	n/a	/n/a	+
10:76285014|76360251	10	76285014	76360251	6	3_2_0	69	0.148	n/a	/n/a	+
10:76349040|76360251	10	76349040	76360251	15	0_6_5	64	0.319	n/a	/n/a	+
10:76360137|76371229	10	76360137	76371229	7	1_2_2	41	0.255	n/a	/n/a	+
10:76598441|76603236	10	76598441	76603236	23	1_4_6	22	0.676	n/a	/n/a	+
10:76729418|76748870	10	76729418	76748870	5	2_0_2	7	0.588	n/a	/n/a	+
10:76910272|76910864	10	76910272	76910864	25	8_8_2	30	0.625	n/a	/n/a	+
10:76978821|76979114	10	76978821	76979114	62	13_14_1	25	0.832	n/a	/n/a	+
10:79741912|79744056	10	79741912	79744056	7	2_2_1	125	0.101	n/a	/n/a	-
10:79761955|79767624	10	79761955	79767624	9	3_4_0	42	0.3	n/a	/n/a	-
10:80961341|80976031	10	80961341	80976031	5	2_1_1	11	0.476	n/a	/n/a	+
10:81526027|81568588	10	81526027	81568588	8	0_1_3	22	0.421	n/a	/n/a	-
10:81808457|81816161	10	81808457	81816161	2	2_1_0	9	0.308	n/a	/n/a	-
10:82228303|82249070	10	82228303	82249070	7	5_2_3	28	0.333	n/a	/n/a	+
10:86130770|86133571	10	86130770	86133571	13	2_1_2	16	0.619	n/a	/n/a	+
10:86132067|86177617	10	86132067	86177617	7	1_0_2	346	0.039	n/a	/n/a	+
10:86132067|86185649	10	86132067	86185649	9	2_2_0	155	0.104	n/a	/n/a	+
10:86177527|86185649	10	86177527	86185649	340	28_50_39	207	0.767	n/a	/n/a	+
10:86177527|86198463	10	86177527	86198463	254	18_32_28	104	0.83	n/a	/n/a	+
10:86177527|86223772	10	86177527	86223772	8	0_1_3	83	0.162	n/a	/n/a	+
10:86177527|86237420	10	86177527	86237420	9	3_3_2	62	0.225	n/a	/n/a	+
10:86185487|86223772	10	86185487	86223772	5	2_1_1	406	0.024	n/a	/n/a	+
10:86198268|86237420	10	86198268	86237420	12	4_2_0	130	0.156	n/a	/n/a	+
[truncated: 10,786 more rows]

## Sheet: SRR5889368_SW480_rep1
circRNA_ID	chr	circRNA_start	circRNA_end	#junction_reads	SM_MS_SMS	#non_junction_reads	junction_reads_ratio	circRNA_type	gene_id	strand
[truncated: 8,626 more rows]

[truncated: 5 more sheets: SRR5889369_SW480_rep2, SRR5889362_SW480_rep3, SRR5889363_SW620_rep1, SRR5889364_SW620_rep2, SRR5889365_SW620_rep3]
