# Supplementary material for: Docker4Circ: A Framework for the Reproducible Characterization of circRNAs from RNA-Seq Data
Source: Int J Mol Sci. 2019 Dec 31;21(1):293. doi: 10.3390/ijms21010293 (PMC6982331; doi:10.3390/ijms21010293)
Supplement: Supplementary file 1 [file ijms-21-00293-s001.zip › Supplementary_Table_2_Merged_CIRI2_circRNAs_list.xlsx]

## Sheet: Merged_circRNA_set
		Average BS supporting reads				BS supporting reads
ID	Strand	Average	NCM460	SW480	SW620	SRR5889366_NCM460_1	SRR5889367_NCM460_2	SRR5889371_NCM460_3	SRR5889362_SW480_1	SRR5889368_SW480_2	SRR5889369_SW480_3	SRR5889363_SW620_1	SRR5889364_SW620_2	SRR5889365_SW620_3
chr11_33307959_33309057	+	1783.56	1008	3702	640.667	987	999	1038	3778	3269	4059	599	673	650
chr9_138773479_138774924	-	1468.22	1487.67	1815	1102	1623	1473	1367	1667	1948	1830	1337	948	1021
chr3_196831774_196846401	-	1353.78	1057.33	2559.33	444.667	1073	1100	999	2518	2472	2688	403	534	397
chr8_128902835_128903244	+	1325.67	1137.67	2356	483.333	1200	1012	1201	2288	2590	2190	534	444	472
chr20_30954187_30956926	+	1281.78	2209.33	1092.67	543.333	2108	2333	2187	853	1118	1307	566	487	577
chr5_137320946_137324004	-	1254.44	2145.67	1189	428.667	2244	2013	2180	1180	1098	1289	434	442	410
chr10_32197100_32199491	-	1227.44	436.333	2076.33	1169.67	370	452	487	1759	2019	2451	1281	1004	1224
chr1_247318868_247323115	-	1213.33	1655.67	890.667	1093.67	1739	1722	1506	851	970	851	1055	1109	1117
chr12_46622936_46637097	-	1050	1600.67	1030.33	519	1487	1614	1701	1159	786	1146	505	578	474
chr14_99924616_99932150	-	1036.44	1605	782.667	721.667	1685	1600	1530	783	778	787	743	707	715
chr7_716866_751164	-	1023.56	350.333	2037.33	683	373	373	305	1835	2158	2119	810	594	645
chr11_66407171_66407594	+	959.889	1917.33	536.333	426	1818	2073	1861	436	506	667	404	392	482
chr2_72945232_72960247	-	898.111	1876.33	655.333	162.667	1943	1902	1784	601	612	753	180	136	172
chr9_33953283_33963789	-	872.889	701	1311.33	606.333	807	658	638	1196	1195	1543	659	558	602
chr5_65284463_65290692	+	822.667	1900	398	170	1830	2067	1803	338	392	464	124	180	206
chr10_126631026_126631876	+	800.556	873	1203.33	325.333	948	805	866	999	1177	1434	379	296	301
chr7_128655033_128658211	-	748.333	1050	793	402	1054	1007	1089	702	754	923	418	341	447
chr6_159004986_159010814	+	734.111	683	601.667	917.667	758	550	741	585	531	689	930	893	930
chrX_53672263_53681075	-	726.889	1147.33	699	334.333	1084	1176	1182	690	662	745	359	354	290
chr8_99718695_99719539	-	678.667	1224.33	412.667	399	1212	1285	1176	299	405	534	259	534	404
chr5_176370336_176385155	-	674	902.333	851	268.667	898	922	887	671	885	997	334	216	256
chr9_6880012_6893232	+	671.333	178	933	903	0	534	0	984	845	970	962	902	845
chr12_120592774_120593523	-	669.333	499	807	702	523	491	483	648	773	1000	728	670	708
chr2_61749746_61761038	-	666.111	984.667	612	401.667	928	864	1162	656	466	714	534	378	293
chr12_111990084_111993723	-	638.111	1192.67	470.333	251.333	1120	1145	1313	475	473	463	207	236	311
chr3_31617888_31621588	+	622.556	895	687.333	285.333	938	834	913	698	634	730	301	250	305
chr20_62407031_62422143	-	609.778	81	1566.33	182	88	78	77	1595	1392	1712	230	203	113
chr12_28458582_28460682	+	584.444	1243	247.667	262.667	1272	1276	1181	222	222	299	317	237	234
chr21_16386665_16415895	-	570	1087.67	499.333	123	1144	1009	1110	390	440	668	88	129	152
chr18_9931807_9937063	+	551.889	1086	411	158.667	1180	1034	1044	338	395	500	166	148	162
chr3_196842798_196846401	-	545.111	628.333	857.667	149.333	660	629	596	848	829	896	111	180	157
chr2_55209651_55214834	-	528.222	783.667	549.333	251.667	845	753	753	467	596	585	339	202	214
chr11_68115315_68115711	+	521	44.3333	164	1354.67	72	28	33	155	164	173	1806	1123	1135
chr11_9451221_9452550	+	513.222	706	421	412.667	691	690	737	383	315	565	370	443	425
chr2_58449077_58459247	-	502.778	633.667	303.667	571	622	646	633	275	265	371	551	546	616
chr5_32135678_32143986	-	496.222	1147.67	221.667	119.333	1119	1247	1077	191	219	255	107	138	113
chr3_196118684_196129890	-	491.222	900.667	460.333	112.667	822	845	1035	451	374	556	80	140	118
chr13_33091994_33101669	-	478.222	737	540.667	157	747	749	715	478	559	585	150	142	179
chr12_46633462_46637097	-	467	616.667	422.333	362	627	578	645	382	486	399	349	348	389
chr22_46085592_46114373	+	462.667	952.667	240.667	194.667	1008	862	988	233	281	208	207	180	197
chr15_89656956_89659752	+	456.778	182.333	639.333	548.667	183	190	174	624	675	619	625	473	548
chr20_30954187_30959677	+	447.556	737.333	458.333	147	791	699	722	447	463	465	150	116	175
chr4_1219148_1235307	-	447.444	431.667	492	418.667	435	470	390	463	455	558	429	448	379
chr1_52959283_52975384	-	442.111	897	263.667	165.667	804	945	942	236	244	311	149	170	178
chr3_98568305_98600611	-	432	24.3333	1027.33	244.333	34	24	15	955	1030	1097	253	230	250
chr7_155465561_155473602	+	431	402	452.667	438.333	391	400	415	474	380	504	273	472	570
chr3_157839892_157841780	+	426.889	412	544	324.667	399	446	391	569	496	567	300	339	335
chr10_70227880_70229920	-	422.444	411.667	385.333	470.333	428	416	391	281	434	441	395	460	556
chr1_65830318_65831879	+	419.333	658.333	310	289.667	634	723	618	285	328	317	275	294	300
chr9_96233423_96238620	+	410	598.667	298.333	333	619	571	606	202	277	416	356	324	319
chr17_80858527_80869665	+	409.778	400	525.667	303.667	412	340	448	546	483	548	376	300	235
chr14_66028055_66028484	+	409.444	297.333	609.667	321.333	335	274	283	599	559	671	314	268	382
chr15_67524152_67529158	-	409.222	470.333	429	328.333	470	495	446	463	494	330	375	280	330
chr5_95091100_95099324	+	407	700.333	393	127.667	735	629	737	409	376	394	139	134	110
chr5_619105_620376	+	396	1021.67	77.3333	89	1101	1005	959	54	63	115	111	63	93
chr16_47531310_47549512	+	394.778	627.333	408.667	148.333	633	622	627	339	414	473	165	172	108
chr1_247320302_247323115	-	393	726	121.333	331.667	705	755	718	112	163	89	311	358	326
chr7_42187825_42188067	-	392.889	59	1119.67	0	58	41	78	1095	1003	1261	0	0	0
chr15_80412670_80415142	+	391.889	729.333	273.333	173	678	737	773	275	324	221	179	192	148
chr7_156619299_156629579	-	391.778	434.667	548.333	192.333	495	406	403	588	540	517	192	208	177
chr8_26439485_26441499	+	391	687.667	364	121.333	658	723	682	324	317	451	73	144	147
chr4_186168448_186188309	+	390.889	185	860.667	127	228	185	142	933	750	899	161	117	103
chr7_158552177_158557544	-	385	234.667	790.667	129.667	237	263	204	707	812	853	110	133	146
chrX_47705504_47755339	+	378.667	366.333	343.333	426.333	404	349	346	310	269	451	357	427	495
chr7_99621042_99621930	+	376	113	693.667	321.333	118	110	111	672	632	777	332	310	322
chr17_57808782_57816308	+	374.667	229.667	748.667	145.667	235	230	224	710	606	930	143	167	127
chr9_114148657_114154104	-	373.889	252	568	301.667	267	246	243	597	567	540	238	321	346
chr2_240929491_240946787	-	372.778	558.667	254.333	305.333	589	593	494	217	234	312	309	329	278
chr9_96233423_96261168	+	370.556	344.333	444	323.333	356	368	309	539	388	405	288	372	310
chr12_116668338_116675510	-	369.222	406.667	611.333	89.6667	367	407	446	620	580	634	60	116	93
chr11_46515158_46529920	-	367.667	786	246.333	70.6667	833	792	733	176	233	330	121	31	60
chr17_80842021_80861354	+	366.778	485.333	510	105	501	467	488	443	505	582	143	78	94
chr5_58476421_58511794	-	366.444	1090.67	3.33333	5.33333	1141	1139	992	0	10	0	5	0	11
chr7_27668990_27672064	-	362.889	664	255.333	169.333	786	608	598	227	184	355	175	128	205
chr13_61013822_61041513	+	361.444	350	385.333	349	312	359	379	446	304	406	465	297	285
chr18_21644104_21649235	+	360.556	503.333	403.667	174.667	497	471	542	412	359	440	168	185	171
chr6_159001972_159010814	+	360.556	367	228.667	486	425	282	394	233	202	251	594	393	471
chr16_88061089_88071617	+	358.778	318.667	505	252.667	336	336	284	490	567	458	295	233	230
chr12_12397196_12397589	-	357.778	456	315	302.333	482	438	448	309	298	338	305	287	315
chr6_87925621_87928449	+	350.556	332	614.333	105.333	319	341	336	504	526	813	116	112	88
chr4_103225474_103236987	-	346	686.333	309	42.6667	755	661	643	290	300	337	78	28	22
chr1_23356962_23377013	+	342.889	643.667	214.667	170.333	625	673	633	250	187	207	190	181	140
chr8_74585342_74601048	-	340.778	528.667	230	263.667	514	516	556	239	206	245	260	279	252
chr5_21491430_21497305	+	337.444	811.667	89.6667	111	887	793	755	77	85	107	119	115	99
chr2_61749746_61753656	-	327.333	367	499	116	373	313	415	441	428	628	115	128	105
chr7_158580695_158591763	-	321.444	428	385	151.333	400	415	469	530	281	344	165	145	144
chr5_68470704_68471364	+	311.667	435.667	314.333	185	419	420	468	271	363	309	230	152	173
chr6_34574332_34574681	-	298.556	622.333	197.667	75.6667	669	621	577	119	179	295	75	83	69
chr8_141856359_141900868	-	297.889	595	151	147.667	642	592	551	123	191	139	146	158	139
chr2_64083440_64085070	+	293	268	458	153	253	281	270	428	414	532	147	132	180
chr1_92798948_92846430	+	292.111	513.333	172.333	190.667	500	508	532	166	173	178	223	144	205
chr16_792250_792543	+	288.444	179.333	317	369	222	147	169	374	342	235	505	278	324
chr15_49528048_49531564	+	287.667	371.667	251	240.333	353	374	388	201	280	272	238	261	222
chr12_109046048_109048186	-	286.778	259	421	180.333	252	266	259	382	490	391	151	201	189
chr7_33185854_33217203	+	285.111	485	249.333	121	478	513	464	215	225	308	105	179	79
chr3_138289160_138291826	-	281.667	580	234	31	585	607	548	148	210	344	34	21	38
chr22_46125305_46136418	+	281.111	542.333	144.667	156.333	618	523	486	165	178	91	207	125	137
chr13_42439872_42442613	-	279.444	192.333	422.667	223.333	208	190	179	276	402	590	241	206	223
chr13_111274563_111276626	+	277.667	111.333	155.333	566.333	123	112	99	166	172	128	621	499	579
chr8_141874411_141900868	-	271.556	582.667	136.333	95.6667	597	578	573	137	145	127	77	124	86
chr12_50385781_50386438	-	271.333	253.667	320.667	239.667	307	206	248	308	319	335	282	235	202
chr17_44143903_44172067	-	268.889	319.667	380.333	106.667	324	295	340	358	361	422	131	103	86
chr10_5827105_5842668	-	268.556	134.333	320.667	350.667	153	165	85	284	339	339	295	409	348
chr2_207144264_207162097	+	263.333	345.667	393.667	50.6667	364	350	323	402	363	416	56	44	52
chr1_247319708_247323115	-	260.333	213.667	247.333	320	157	218	266	302	199	241	335	329	296
chr1_151611364_151611595	+	257.333	389	188.667	194.333	447	381	339	199	162	205	176	160	247
chr7_131060183_131084192	+	256.889	369.667	228.333	172.667	414	360	335	219	174	292	219	186	113
chr13_113170754_113181798	-	255.778	194.333	176.333	396.667	217	206	160	205	180	144	408	322	460
chr10_86177527_86185649	+	254.111	355.333	178.667	228.333	401	340	325	144	174	218	215	228	242
chr1_94032836_94033408	-	251.667	396.667	323.333	35	406	435	349	276	350	344	52	17	36
chr6_84108086_84117620	-	249.333	366.333	169.333	212.333	362	404	333	151	173	184	188	263	186
chr11_12785726_12785981	+	244.889	231.333	284	219.333	186	275	233	274	281	297	158	283	217
chrX_106331666_106332069	-	243	292.333	199.333	237.333	294	283	300	188	213	197	231	254	227
chr4_88116476_88116842	-	241.667	481.333	86.6667	157	490	495	459	113	58	89	149	128	194
chr17_57842332_57851246	+	241	619	81.3333	22.6667	748	549	560	112	73	59	39	19	10
chr6_111208708_111211559	+	239.222	331.667	225.667	160.333	394	350	251	212	201	264	162	135	184
chr11_128993341_129034322	-	238.889	110	397.667	209	139	85	106	419	363	411	197	224	206
chr2_58311224_58316858	+	238.778	354	170.667	191.667	348	313	401	210	141	161	203	194	178
chr9_98740343_98766983	+	236.111	519.333	113	76	533	487	538	156	113	70	59	98	71
chr10_7318854_7327916	-	234.111	702.333	0	0	800	643	664	0	0	0	0	0	0
chr7_43679048_43680248	-	233.778	249.333	298.667	153.333	316	239	193	267	308	321	154	163	143
chr9_20819795_20823114	+	233.222	414.333	189.333	96	417	453	373	164	214	190	107	66	115
chr14_81362062_81372425	-	231.444	221.333	307	166	217	221	226	242	306	373	166	158	174
chr5_170305101_170323119	+	231.222	485	158	50.6667	520	419	516	167	152	155	45	69	38
chr14_21698478_21702388	-	229.556	219.333	295.667	173.667	213	230	215	312	253	322	138	205	178
chr18_29691717_29693823	+	227.778	377.333	181.333	124.667	359	432	341	216	127	201	127	122	125
chr8_131370263_131374017	-	227.778	125.333	555	3	116	133	127	544	456	665	9	0	0
chr6_47471016_47472494	+	227.333	297.333	207	177.667	289	296	307	200	165	256	119	232	182
chr22_46085592_46098727	+	226.111	497	95.6667	85.6667	551	476	464	107	82	98	105	56	96
chr15_43120126_43132631	-	225.778	351	233	93.3333	371	343	339	171	250	278	112	71	97
chr3_149563798_149639014	+	225.778	258	328.333	91	247	272	255	397	296	292	65	86	122
chr5_353845_376831	+	224.556	3.66667	98.3333	571.667	0	0	11	93	145	57	609	570	536
chrX_24190832_24197887	+	223.556	231.667	320	119	246	192	257	209	337	414	91	145	121
chr11_46098305_46113774	-	223.333	344.333	195.333	130.333	351	347	335	166	163	257	91	137	163
chr8_18656805_18662408	-	220.444	248.333	262	151	259	211	275	262	257	267	146	205	102
chr4_17963526_17974508	-	219.778	351.667	202	105.667	351	353	351	132	175	299	104	90	123
chr17_79660684_79661883	+	219.556	26.3333	384.667	247.667	21	29	29	336	360	458	240	230	273
chr5_170610199_170632616	+	219.444	344	252.667	61.6667	364	357	311	220	290	248	67	76	42
chr2_225400245_225422573	-	219.333	374.667	205.667	77.6667	354	372	398	181	224	212	93	59	81
chr7_152007051_152012423	-	215.778	412	160	75.3333	412	406	418	121	171	188	128	50	48
chr13_76134889_76143643	+	215	125.667	251.333	268	110	150	117	254	216	284	268	303	233
chr2_191523884_191537878	+	213.778	210.667	201.333	229.333	190	226	216	162	213	229	146	290	252
chr5_124036707_124036962	-	209.444	0	611	17.3333	0	0	0	555	650	628	26	0	26
chr21_38792601_38802702	+	205	301.667	240	73.3333	277	307	321	230	236	254	76	59	85
chr3_156411809_156413814	+	204.222	251	249	112.667	244	254	255	246	251	250	102	130	106
chr7_74119496_74133260	+	204	278	257.667	76.3333	267	343	224	272	245	256	57	71	101
chr12_70193989_70195501	+	202.778	328.333	181.667	98.3333	332	330	323	203	169	173	124	90	81
chr1_91382197_91383711	-	202	421.333	80.3333	104.333	407	463	394	113	73	55	88	86	139
chr3_57875768_57882659	+	202	131.667	351.333	123	171	118	106	272	416	366	130	113	126
chr15_41961026_41962156	+	201.889	237.333	246.333	122	253	233	226	215	247	277	104	97	165
chr22_25771780_25777545	-	199.556	135.667	32.3333	430.667	162	122	123	25	40	32	551	370	371
chr1_44877653_44878394	+	199.444	260	227.333	111	231	289	260	234	185	263	101	162	70
chr3_149563798_149589941	+	198.667	284.333	225.333	86.3333	263	311	279	184	245	247	86	90	83
chr22_30032740_30038274	+	197.889	341.667	209.667	42.3333	369	328	328	160	227	242	39	56	32
chr11_130130751_130131824	-	197.444	155	321.333	116	166	154	145	323	326	315	115	104	129
chr3_31917925_31921322	-	197.111	344.333	179.333	67.6667	358	339	336	177	113	248	47	74	82
chr20_62421174_62422143	-	194.778	31.6667	478.667	74	27	50	18	449	401	586	83	88	51
chr9_86292642_86293514	-	194.667	278.333	196	109.667	245	307	283	150	260	178	144	72	113
chr7_27668990_27689252	-	193.333	225.333	219.333	135.333	275	205	196	232	196	230	118	151	137
chr7_1937836_1976533	-	192	90	358.333	127.667	99	80	91	360	384	331	132	134	117
chr7_22330794_22357656	-	191.778	0	575.333	0	0	0	0	692	534	500	0	0	0
chr6_79752560_79770535	-	187.444	257.333	193.667	111.333	295	219	258	221	159	201	128	71	135
chr7_2269619_2270362	-	187.111	210.333	216	135	218	207	206	196	222	230	143	127	135
chr1_42730786_42744343	-	186.333	245.333	190.667	123	275	242	219	227	193	152	139	105	125
chr5_77805607_77806221	-	185.778	184.333	137.667	235.333	186	189	178	121	154	138	307	173	226
chr8_18622959_18662408	-	185.556	289	192.667	75	290	307	270	169	172	237	54	73	98
chr6_161443042_161455481	+	185.111	399.333	93.3333	62.6667	441	385	372	119	51	110	43	75	70
chr5_76745585_76760634	-	184	305.667	162.667	83.6667	338	294	285	122	150	216	91	82	78
chr12_11187381_11199787	-	182.444	489.667	40.6667	17	519	491	459	0	66	56	12	32	7
chr9_6420912_6434173	+	182.444	153.333	275.667	118.333	182	119	159	326	245	256	135	123	97
chr19_58904343_58904854	+	182.111	75.6667	249.333	221.333	68	66	93	237	210	301	353	160	151
chr1_12638746_12639440	-	181.556	266.333	258	20.3333	293	258	248	240	256	278	16	26	19
chr1_44773982_44785416	-	181.444	337.667	75.3333	131.333	337	312	364	59	86	81	158	134	102
chr10_94653106_94659401	+	180.111	365	113.667	61.6667	364	369	362	118	108	115	86	45	54
chr12_51173923_51203372	+	179.556	414	76	48.6667	470	392	380	63	63	102	60	51	35
chr17_47388674_47390207	-	179.444	168.667	254.333	115.333	196	160	150	266	234	263	154	87	105
chr1_9991949_9994918	-	178.444	182	161.333	192	185	204	157	122	181	181	174	260	142
chr5_10213603_10224173	-	177.667	495	6.33333	31.6667	459	481	545	14	5	0	31	18	46
chr4_129913322_129925031	-	177.556	224.333	261.333	47	236	229	208	270	231	283	16	45	80
chr13_20279802_20283739	-	176.667	133.667	266.667	129.667	139	123	139	257	236	307	105	132	152
chr12_116534474_116549317	-	175.222	207	284.333	34.3333	206	221	194	304	264	285	46	31	26
chr16_69404386_69406258	-	175	94	122.667	308.333	118	87	77	104	134	130	279	295	351
chr12_27867713_27877119	+	174.333	185	223.333	114.667	201	188	166	203	212	255	126	105	113
chr5_43675613_43677908	+	174	308.333	98.6667	115	312	311	302	138	84	74	120	126	99
chr1_22404922_22413359	+	172.889	291	105.667	122	257	321	295	102	59	156	137	81	148
chr17_80521230_80526077	+	172.111	193	194	129.333	201	184	194	145	207	230	103	170	115
chr9_88233898_88248289	-	171.778	289.333	218.667	7.33333	295	294	279	219	201	236	5	0	17
chr2_171538905_171539569	-	170.667	0	177.667	334.333	0	0	0	146	180	207	368	237	398
chr4_7870349_7873807	-	170.556	368.667	83	60	395	338	373	64	86	99	42	56	82
chr4_6925100_6969151	+	170.222	85.3333	203.333	222	94	69	93	172	246	192	159	235	272
chr2_135010666_135012215	+	168.444	20.6667	316	168.667	21	19	22	309	297	342	205	152	149
chr10_5815805_5842668	-	167.889	114.333	199.333	190	110	114	119	190	193	215	178	227	165
chr3_142455221_142467302	+	165.778	322.333	122.333	52.6667	312	293	362	109	98	160	69	28	61
chr12_117423011_117426674	+	165	235.667	131	128.333	235	248	224	94	133	166	135	122	128
chr17_80863812_80869665	+	164.444	167.333	225.667	100.333	201	157	144	146	198	333	160	50	91
chr7_148543562_148544397	-	162.667	169.333	218.667	100	140	183	185	178	205	273	101	113	86
chr8_141889570_141900868	-	162.222	391	72	23.6667	396	420	357	56	70	90	30	23	18
chr3_196817783_196846401	-	162	50.6667	379.667	55.6667	54	34	64	340	442	357	40	59	68
chr3_138289160_138291774	-	161.667	0	390.667	94.3333	0	0	0	337	445	390	90	102	91
chr14_71880665_71996087	+	161.556	347	89.3333	48.3333	344	348	349	108	101	59	44	50	51
chr11_18312989_18314523	-	161.111	237.333	138	108	215	236	261	94	121	199	68	169	87
chr19_34921481_34925873	+	160.556	108	240.667	133	100	122	102	235	245	242	145	135	119
chr5_38991051_39003724	-	160.333	405	35.6667	40.3333	418	382	415	40	16	51	52	35	34
chr5_43675613_43704502	+	160.222	270	96.3333	114.333	256	265	289	80	81	128	113	140	90
chr17_49118862_49133843	-	159.889	284.333	144	51.3333	270	269	314	141	122	169	53	65	36
chr1_247302018_247323115	-	159.222	335.333	48	94.3333	359	321	326	42	26	76	79	93	111
chr9_137582758_137593179	+	158.333	475	0	0	449	477	499	0	0	0	0	0	0
chr11_46515158_46534363	-	157.333	339	105.667	27.3333	373	325	319	84	146	87	27	35	20
chr3_67546222_67559327	-	157.111	283.333	150	38	284	264	302	158	182	110	38	42	34
chr13_33306238_33309467	+	154.889	334	73	57.6667	369	348	285	53	74	92	36	48	89
chr4_151682935_151729550	-	154.111	152	187.667	122.667	131	160	165	189	169	205	135	127	106
chr3_11399892_11468400	+	153.889	261.667	147	53	257	286	242	126	189	126	43	47	69
chr7_99952766_99953427	+	153.778	117.333	269	75	149	120	83	278	188	341	30	106	89
chr16_1004357_1004666	-	153.222	127	80.6667	252	134	118	129	56	96	90	321	231	204
chr3_127980971_127983624	+	152.667	255.333	130	72.6667	260	253	253	126	143	121	64	80	74
chr1_167935867_167944253	+	151.778	281.667	91	82.6667	290	237	318	122	68	83	62	81	105
chr11_62406455_62407203	-	151.444	55.3333	204.333	194.667	69	35	62	130	206	277	173	201	210
chr5_142434004_142437312	+	150.889	110.333	149.333	193	136	71	124	161	125	162	279	158	142
chr17_1264386_1265302	-	150.667	195	156	101	226	176	183	134	130	204	86	115	102
chr2_58425729_58459247	-	149.556	223.667	91.3333	133.667	253	217	201	84	48	142	125	140	136
chr7_156549087_156619438	-	149.222	176.333	220	51.3333	184	141	204	198	141	321	60	20	74
chr14_50130033_50141145	-	148.556	236	95	114.667	207	280	221	93	89	103	135	93	116
chr9_125042722_125054119	+	147.667	180	202.333	60.6667	200	174	166	163	224	220	69	52	61
chr17_59853762_59857762	-	147	246.333	111	83.6667	252	252	235	123	91	119	87	78	86
chr3_50102464_50103935	+	146.889	125	183	132.667	121	104	150	237	193	119	136	107	155
chr8_141357856_141370292	-	146.556	49	262	128.667	48	27	72	187	273	326	170	131	85
chr2_148730308_148733544	-	146.111	275.333	74.6667	88.3333	296	245	285	52	57	115	86	95	84
chr5_21491430_21495291	+	146	224.333	53	160.667	240	209	224	62	54	43	180	156	146
chr5_72370569_72373320	+	146	223.667	114	100.333	271	197	203	128	52	162	89	86	126
chr5_179688684_179707608	-	145.778	300.667	91.6667	45	318	271	313	59	75	141	28	50	57
chr16_31733947_31734674	+	145.444	109.333	252	75	136	92	100	258	197	301	61	81	83
chr18_13681604_13682104	-	145.333	109	216	111	133	101	93	248	180	220	150	113	70
chr5_60768508_60768864	+	144.667	296	101	37	327	250	311	83	121	99	50	33	28
chr19_1031070_1032695	+	143.778	67.6667	152.333	211.333	77	62	64	118	126	213	269	177	188
chr18_74561482_74563895	+	143.333	178.333	119	132.667	146	194	195	81	133	143	96	181	121
chr10_1130343_1142186	+	142.778	109.667	120.667	198	124	115	90	124	141	97	191	250	153
chr17_29483001_29497015	+	142.778	265.667	105.667	57	265	223	309	123	117	77	44	50	77
chr21_34804484_34805178	+	142.778	196.333	148.667	83.3333	202	227	160	161	109	176	92	58	100
chr7_24663285_24690331	+	142.333	148.667	173	105.333	127	167	152	157	169	193	84	122	110
chr4_6925100_6925838	+	141.444	73.6667	129	221.667	72	74	75	118	147	122	249	154	262
chr12_19615444_19626289	+	141.222	298.667	83	42	310	325	261	90	99	60	22	42	62
chr20_36685934_36694658	+	139.889	89	229	101.667	105	86	76	268	206	213	63	144	98
chr17_4186093_4200109	-	139.333	212	116.667	89.3333	223	196	217	91	130	129	82	125	61
chr2_234296903_234299129	+	138.667	115.667	211	89.3333	103	119	125	191	155	287	65	85	118
chr4_3088666_3109150	+	138.667	176.667	136	103.333	187	161	182	110	89	209	104	99	107
chr5_56160561_56161804	+	138.667	139	213.333	63.6667	155	121	141	202	204	234	70	57	64
chr2_169018297_169038600	-	137.889	173	163.667	77	152	204	163	179	162	150	94	68	69
chr20_33954360_33971936	-	137.444	84.6667	172	155.667	86	97	71	190	157	169	180	122	165
chr22_28692186_28693840	-	136.444	409.333	0	0	448	365	415	0	0	0	0	0	0
chr1_51868107_51874004	-	135.556	156.667	166	84	121	168	181	137	188	173	70	75	107
chr6_158994452_159010814	+	135.444	139.667	64	202.667	171	125	123	91	47	54	317	157	134
chr7_56049903_56051561	+	135.333	196.333	84.6667	125	198	221	170	109	40	105	124	127	124
chr8_52773405_52773806	-	135.111	200.667	83.6667	121	218	197	187	86	71	94	123	113	127
chr2_30748453_30756180	+	134.556	147.333	156.333	100	188	134	120	158	108	203	151	72	77
chr14_80963812_80997230	-	134.222	268.333	108.333	26	281	268	256	61	110	154	27	28	23
chrX_322140_323067	-	134	209.667	141	51.3333	231	178	220	138	213	72	54	33	67
chr7_104678573_104681470	+	132.778	161.333	214.667	22.3333	203	143	138	206	213	225	37	15	15
chr9_4823548_4833228	+	131	176.333	74.6667	142	186	173	170	95	78	51	159	179	88
chr17_43552466_43553092	-	130.444	91.6667	221.667	78	88	101	86	187	211	267	109	81	44
chr1_231090079_231097049	-	130.333	148.667	130	112.333	153	119	174	66	144	180	118	91	128
chr4_151719233_151738409	-	130.111	183.333	157.333	49.6667	208	179	163	102	162	208	40	68	41
chr6_5404775_5431405	+	130.111	235.333	88	67	225	270	211	59	110	95	107	37	57
chr16_47531310_47581459	+	129.667	173	154.333	61.6667	187	165	167	132	135	196	76	60	49
chr7_156758964_156759786	+	129.667	121.333	161	106.667	118	153	93	102	191	190	70	116	134
chr5_6737623_6746540	+	129.444	229.667	36.6667	122	223	230	236	25	50	35	114	109	143
chr2_122260743_122287901	-	129.333	115.333	198	74.6667	114	106	126	208	156	230	63	102	59
chr5_65284463_65310553	+	128.333	327.333	39.3333	18.3333	322	322	338	43	30	45	21	27	7
chr5_1488506_1501718	-	127.889	335.667	26.6667	21.3333	384	336	287	29	22	29	16	22	26
chr9_134312007_134314448	+	127.556	203.333	128.333	51	210	215	185	142	127	116	45	50	58
chr13_26911704_26928017	+	127.111	72.3333	280	29	70	69	78	303	284	253	29	24	34
chr2_122363277_122363756	-	127.111	127	178.667	75.6667	140	120	121	178	196	162	79	82	66
chr22_46096162_46136418	+	126.889	264	77.3333	39.3333	316	229	247	65	71	96	53	43	22
chr7_141336760_141349133	+	126.889	222	76.6667	82	193	237	236	119	0	111	78	50	118
chr7_77214860_77230123	+	126	94	229.667	54.3333	97	89	96	199	189	301	45	52	66
chr15_49517402_49531564	+	125.444	206	90.6667	79.6667	242	220	156	69	86	117	74	62	103
chr2_136620177_136622733	-	125	91.3333	213.667	70	94	98	82	224	201	216	63	64	83
chr1_32381496_32385259	-	123.889	219.667	107	45	182	239	238	141	102	78	48	31	56
chr11_117023157_117034608	+	123.889	64.3333	196	111.333	74	49	70	193	191	204	111	78	145
chr19_34921481_34929671	+	123.889	95.6667	193.667	82.3333	78	85	124	169	151	261	63	114	70
chr4_78694235_78697546	-	123.111	177.333	153.333	38.6667	191	176	165	127	135	198	35	43	38
chr3_196812451_196846401	-	122.889	34.3333	279	55.3333	25	21	57	191	276	370	49	56	61
chr7_92921015_92926555	+	122.778	111.333	208.333	48.6667	94	130	110	195	167	263	42	86	18
chr9_74838036_74846097	+	122.667	364.333	0	3.66667	356	345	392	0	0	0	11	0	0
chr4_148860976_148876525	+	122.444	205	103	59.3333	195	231	189	76	143	90	26	59	93
chr14_104245082_104263855	-	122.333	134.667	182.333	50	159	140	105	113	219	215	4	59	87
chr5_70888753_70900295	+	122.111	88.3333	143.667	134.333	85	100	80	109	166	156	104	151	148
chr16_53907698_53922863	+	121.889	145	129	91.6667	145	134	156	154	113	120	107	97	71
chr15_25650608_25657118	-	121.778	145	155.333	65	163	150	122	184	128	154	64	86	45
chr8_48320423_48353104	+	121.778	256	81	28.3333	241	262	265	101	84	58	30	26	29
chr2_36668401_36669878	+	121.111	242.333	121	0	287	224	216	122	112	129	0	0	0
chr1_172520652_172526934	+	120.444	199.667	114	47.6667	198	217	184	136	137	69	61	33	49
chr2_61712903_61717911	-	120.222	79.6667	184	97	78	80	81	189	159	204	75	121	95
chr9_33971649_33973235	-	120.111	79	203.333	78	75	102	60	218	184	208	60	89	85
chr2_148730308_148739650	-	120	209	128.333	22.6667	226	181	220	125	105	155	20	15	33
chr7_73770740_73771807	+	118.444	16	276	63.3333	22	16	10	200	270	358	104	33	53
chr9_86297866_86301070	-	118.444	185.667	127.333	42.3333	165	202	190	106	160	116	43	37	47
chr1_8601273_8674745	-	117.222	173	74.3333	104.333	165	179	175	74	71	78	110	79	124
chr12_46633462_46648719	-	116.667	251.667	47.3333	51	256	234	265	30	41	71	40	69	44
chr5_38991051_39021238	-	116.333	235.667	48.3333	65	240	232	235	65	62	18	73	68	54
chr3_196807922_196846401	-	116.222	39.6667	278.667	30.3333	30	53	36	258	265	313	31	14	46
chr1_155823067_155823597	-	116.111	109.667	110.667	128	103	102	124	128	85	119	143	129	112
chr11_77336008_77336863	-	115.778	153.667	84.6667	109	184	136	141	89	62	103	95	145	87
chr5_72151601_72161556	+	115.667	318.667	22.3333	6	334	348	274	13	19	35	6	0	12
chr10_5836848_5842668	-	115.556	87	120.333	139.333	112	73	76	121	95	145	122	144	152
chr12_50821545_50824353	+	115.556	77.3333	165.333	104	80	76	76	167	161	168	101	113	98
chr1_29481208_29481422	-	115.444	133	117.333	96	131	136	132	83	150	119	53	91	144
chr22_43286953_43287188	-	115.444	155	145.667	45.6667	172	150	143	131	150	156	53	55	29
chr7_64004085_64004810	-	115.444	62	146.333	138	53	87	46	107	112	220	147	145	122
chr17_80842021_80869665	+	115.111	93	156.333	96	95	74	110	128	169	172	114	69	105
chr6_160819011_160831878	+	114.778	235.667	0	108.667	249	221	237	0	0	0	147	91	88
chr8_141749117_141762415	-	114.778	209	50.6667	84.6667	216	200	211	22	58	72	84	78	92
chr17_1746097_1747980	+	114.333	148.333	123.667	71	142	169	134	129	143	99	62	64	87
chr5_170610203_170632616	+	114.333	167.667	136.333	39	172	142	189	93	132	184	23	57	37
chr16_68300496_68309152	+	114.222	88.3333	93.3333	161	79	93	93	90	71	119	176	97	210
chr7_3658712_3681737	+	114	35.3333	306.667	0	37	36	33	316	315	289	0	0	0
chr3_149613260_149639014	+	113.444	75.6667	219.667	45	106	57	64	260	206	193	54	35	46
chr12_22796697_22826594	+	113.222	101.667	103.333	134.667	98	106	101	78	79	153	124	135	145
chr3_63898264_63898901	+	112.889	83.6667	121.333	133.667	100	73	78	77	114	173	91	156	154
chr8_80182258_80201046	-	112.667	1.33333	326.333	10.3333	4	0	0	248	371	360	14	0	17
chr3_33725851_33738425	-	112.333	156	82	99	159	172	137	60	97	89	97	59	141
chr2_39559058_39564722	-	112.222	156	99	81.6667	158	179	131	79	92	126	54	123	68
chr12_111991962_111993723	-	111.778	100.333	215.333	19.6667	75	85	141	220	162	264	35	24	0
chr12_936208_939326	+	111.667	219	73.6667	42.3333	249	215	193	62	92	67	29	54	44
chr6_87920169_87928449	+	111.667	109	190	36	115	125	87	184	197	189	44	39	25
chr10_126727566_126799662	-	111.444	101.667	136	96.6667	136	109	60	99	164	145	108	107	75
chr11_73418465_73431944	-	111.444	174	121.333	39	176	158	188	55	119	190	18	69	30
chr7_158566032_158591763	-	111.333	142	147.667	44.3333	138	111	177	119	160	164	42	41	50
chr1_31478700_31479949	-	110.778	197.667	79.6667	55	206	218	169	88	90	61	60	35	70
chr11_128963516_129034322	-	110.556	51	175.667	105	51	41	61	177	163	187	111	100	104
chr17_79937060_79943483	+	110.444	91.6667	53.6667	186	119	77	79	62	45	54	199	220	139
chr11_61133517_61135470	+	110.111	142.667	102	85.6667	153	142	133	137	57	112	101	86	70
chr1_155646339_155649303	-	109.889	188	69.3333	72.3333	232	168	164	76	82	50	67	58	92
chr3_4452549_4461830	-	109.889	269.333	43.3333	17	265	260	283	31	36	63	16	15	20
chr6_117019867_117026323	+	109.444	196.667	50	81.6667	228	180	182	28	45	77	65	71	109
chr11_128993341_128994789	-	109.222	23.3333	223	81.3333	16	35	19	177	249	243	68	122	54
chr9_95018962_95032265	-	109.222	91.3333	139.333	97	104	107	63	165	116	137	82	93	116
chr17_1746097_1756483	+	109.111	147.333	92.6667	87.3333	164	142	136	99	84	95	87	93	82
chr10_93185038_93221941	+	108.111	276.667	45.3333	2.33333	277	268	285	43	47	46	7	0	0
chr12_11181000_11199787	-	107.556	269.333	34.3333	19	253	306	249	8	36	59	16	11	30
chr14_55168780_55169298	+	107	108.333	212.667	0	115	128	82	190	226	222	0	0	0
chr4_4650704_4651269	+	107	203	44.3333	73.6667	234	194	181	41	33	59	84	76	61
chr5_40728447_40730445	-	106.778	244	34.6667	41.6667	220	251	261	25	32	47	52	42	31
chr4_151023630_151023964	+	106.333	305.333	13.6667	0	279	324	313	0	25	16	0	0	0
chr13_96637493_96648389	-	106.222	196	73.3333	49.3333	185	210	193	77	49	94	42	24	82
chr19_17212470_17213367	+	106.222	39.6667	170.667	108.333	48	24	47	105	133	274	124	75	126
chr6_57372288_57398317	+	106.222	251.333	48.6667	18.6667	290	204	260	66	39	41	20	14	22
chr1_51032749_51061888	-	106.111	140.333	86.6667	91.3333	130	160	131	80	56	124	98	75	101
chr7_131071879_131084192	+	105.778	80.3333	183	54	78	78	85	153	134	262	51	45	66
chr14_105718844_105739231	-	105.667	123.667	128.667	64.6667	167	95	109	172	141	73	98	33	63
chr1_94107860_94140497	-	105.556	224	86.6667	6	241	187	244	78	82	100	8	0	10
chr3_111632166_111639266	+	105.556	168.667	148	0	190	157	159	182	128	134	0	0	0
chr11_77394755_77404656	-	104.778	116.667	121.667	76	136	127	87	171	82	112	86	60	82
chr20_10536879_10541468	+	104.556	90	121	102.667	100	71	99	106	104	153	97	124	87
chr1_180366651_180382606	-	104.444	152.667	79.6667	81	129	176	153	91	84	64	71	67	105
chr5_14316622_14336836	+	104.111	146	146.333	20	145	142	151	104	148	187	39	0	21
chr8_117668095_117671219	-	104.111	114.333	101.667	96.3333	113	149	81	108	89	108	122	110	57
chr12_129299320_129299615	-	104	87	112.333	112.667	101	58	102	109	110	118	118	82	138
chr9_128419930_128434922	-	103.889	149	110	52.6667	120	127	200	126	85	119	60	60	38
chr3_31617888_31641951	+	103.556	160.667	132.333	17.6667	146	193	143	132	133	132	19	26	8
chr7_6472468_6476164	-	103.556	144.667	123.333	42.6667	159	144	131	118	138	114	69	27	32
chr12_49053688_49054402	-	103.444	97.3333	103.333	109.667	108	89	95	98	140	72	113	133	83
chr17_49340635_49346265	+	103	127.667	131.667	49.6667	130	122	131	97	160	138	58	25	66
chr21_46275125_46281186	-	103	103	159	47	113	94	102	177	176	124	40	69	32
chr1_247322308_247323115	-	102.889	188.333	52	68.3333	209	186	170	46	55	55	51	84	70
chr17_36517594_36533668	+	102.778	128.667	126.667	53	119	145	122	99	163	118	50	28	81
chr4_1221987_1235307	-	102.444	173.333	47.6667	86.3333	173	198	149	63	29	51	73	107	79
chr6_10703638_10705077	+	101.333	41	85	178	46	39	38	82	51	122	194	178	162
chr3_52946554_52950230	-	101.222	91.6667	113.667	98.3333	91	105	79	102	136	103	156	44	95
chr6_128643184_128643455	-	101.111	166.333	79	58	187	160	152	79	70	88	75	35	64
chr12_116674626_116675510	-	100.889	54.6667	217.667	30.3333	63	55	46	236	207	210	11	16	64
chr1_200729967_200784772	+	100.778	165.333	87	50	166	130	200	91	63	107	51	54	45
chr10_126799559_126811437	-	100.778	177	63	62.3333	150	220	161	57	66	66	34	82	71
chr6_157357969_157406039	+	100.667	63.3333	114.667	124	69	54	67	119	145	80	148	101	123
chr9_136277419_136278041	-	100.556	85	141.333	75.3333	71	79	105	119	183	122	98	60	68
chr10_86177527_86198463	+	100.444	221.667	26.6667	53	236	254	175	42	0	38	61	34	64
chr11_85685751_85695016	-	100.444	125	122.667	53.6667	130	124	121	158	122	88	63	38	60
chr12_28378728_28412375	+	100.111	300.333	0	0	310	333	258	0	0	0	0	0	0
chr2_61505300_61508377	-	99.3333	88.3333	145.333	64.3333	107	99	59	163	156	117	73	52	68
chr15_69728477_69729061	+	99.2222	56.3333	148.333	93	57	53	59	139	141	165	76	120	83
chr19_17387304_17387718	+	99	199	52.6667	45.3333	200	180	217	54	67	37	41	53	42
chr2_239090706_239093928	-	99	85.3333	101	110.667	79	86	91	86	98	119	140	60	132
chr8_100286426_100287482	+	98.8889	211.667	54.6667	30.3333	291	180	164	38	69	57	44	24	23
chr5_167915607_167921655	+	98.6667	180.667	99.6667	15.6667	175	180	187	86	97	116	15	16	16
chr15_50940884_50955243	-	98.4444	177	77	41.3333	195	148	188	94	65	72	37	49	38
chr9_111868788_111870850	-	98.2222	159.333	103.667	31.6667	164	169	145	96	102	113	37	36	22
chr12_70671912_70704797	+	98.1111	160.667	92.3333	41.3333	186	161	135	94	123	60	54	40	30
chr5_107521818_107684231	-	98	138.333	58.6667	97	134	155	126	44	76	56	97	121	73
chr16_15973661_15978062	-	97.6667	218	53	22	203	235	216	74	34	51	9	23	34
chr14_103865288_103871604	+	97.5556	131	95.3333	66.3333	153	115	125	124	121	41	54	60	85
chr11_128932175_128936763	-	97.4444	29.6667	149.333	113.333	37	30	22	125	160	163	137	92	111
chr5_176370336_176378578	-	97.4444	0	232	60.3333	0	0	0	213	224	259	48	55	78
chr11_13435077_13443385	-	97.3333	46.6667	159.667	85.6667	55	58	27	106	154	219	99	55	103
chr11_70505933_70507783	-	97.1111	2.33333	116.333	172.667	2	3	2	136	94	119	150	224	144
chr3_171830242_171851336	+	96.8889	184.667	96.6667	9.33333	159	208	187	99	82	109	4	15	9
chr3_183097085_183107567	-	96.4444	214	75.3333	0	210	192	240	86	49	91	0	0	0
chr9_128099297_128099870	+	96.4444	119.667	121	48.6667	147	119	93	106	122	135	63	49	34
chr20_21346059_21349228	+	96.3333	35	113	141	27	45	33	85	111	143	135	126	162
chr1_115005726_115007010	-	96.2222	171	86	31.6667	178	153	182	81	100	77	20	40	35
chr8_145245687_145255444	+	96.2222	42	156.333	90.3333	42	41	43	175	134	160	132	48	91
chr9_37424842_37426651	+	95.8889	60.6667	156.667	70.3333	47	64	71	135	166	169	61	76	74
chr10_70218861_70229920	-	95.7778	189.667	50.6667	47	210	180	179	36	62	54	74	15	52
chr21_38792601_38845182	+	95.7778	123	118.667	45.6667	146	135	88	91	126	139	50	49	38
chr22_21288067_21288532	+	95.6667	90.6667	126	70.3333	99	60	113	135	100	143	51	86	74
chr9_88920107_88924932	-	95.6667	141.667	97	48.3333	143	154	128	126	83	82	51	22	72
chr5_34179118_34182972	-	95.5556	1.33333	81.6667	203.667	0	4	0	46	93	106	230	226	155
chr3_11399892_11421526	+	95.2222	149.333	108	28.3333	165	129	154	97	105	122	46	20	19
chr1_45223228_45223812	+	95	94	140.667	50.3333	118	77	87	157	149	116	50	44	57
chr11_86778736_86802437	+	94.7778	164.667	63	56.6667	166	182	146	69	52	68	67	51	52
chr1_179100446_179102509	-	94.3333	162.667	93	27.3333	178	159	151	93	71	115	29	23	30
chr13_47297356_47308133	+	94.2222	8	139.333	135.333	9	12	3	155	121	142	132	146	128
chr17_80861281_80869665	+	94.2222	94	115	73.6667	129	78	75	96	118	131	85	63	73
chr18_9524592_9525849	+	94.1111	73	151	58.3333	73	80	66	179	104	170	57	56	62
chr5_151169884_151170623	+	93.1111	50.6667	167.667	61	56	57	39	150	186	167	46	84	53
chr3_197592294_197602646	+	93	63.6667	168.333	47	54	95	42	183	155	167	46	44	51
chr5_133534777_133541822	-	93	136.667	117	25.3333	150	126	134	142	89	120	34	28	14
chr15_99250791_99251336	+	92.8889	165.333	68	45.3333	194	135	167	69	58	77	61	41	34
chr14_103470265_103478525	-	92.7778	170.667	97	10.6667	177	161	174	80	93	118	23	0	9
chr11_78176922_78204241	-	92.4444	106	129.667	41.6667	109	84	125	148	106	135	50	37	38
chr7_87593949_87607727	+	92.4444	69.3333	125.333	82.6667	75	63	70	99	92	185	49	89	110
chr17_58711214_58725443	+	92.2222	95.3333	100.333	81	94	117	75	88	111	102	79	78	86
chr17_80842021_80858607	+	91.8889	94	103.667	78	107	93	82	101	106	104	65	92	77
chr4_83799883_83803093	-	91.4444	85.6667	105	83.6667	79	82	96	97	121	97	78	69	104
chr12_19626182_19653155	+	91.3333	238.667	28	7.33333	265	253	198	26	12	46	8	0	14
chr2_206992521_206994966	-	91	101.333	119.667	52	105	114	85	155	123	81	71	58	27
chr7_44684926_44687358	+	90.8889	113	120.667	39	115	124	100	90	117	155	71	23	23
chr8_124089351_124096580	+	90.7778	90.6667	60.3333	121.333	103	92	77	78	69	34	147	106	111
chr15_85607601_85610435	+	90.6667	173.667	57.3333	41	167	160	194	71	67	34	40	43	40
chr3_183056588_183107567	-	90.6667	172.333	98	1.66667	170	178	169	144	60	90	0	0	5
chr3_51575514_51586079	+	90.5556	126.667	127.333	17.6667	132	147	101	125	122	135	16	20	17
chr5_122881111_122893258	+	90.4444	117.333	128.667	25.3333	105	113	134	134	120	132	25	32	19
chr16_27224906_27226329	+	90.3333	135	88.3333	47.6667	142	119	144	74	90	101	58	43	42
chr17_28934570_28937960	+	90.1111	191.333	58.6667	20.3333	218	202	154	44	55	77	18	25	18
chr19_5039847_5047680	+	90.1111	141.333	88.3333	40.6667	139	117	168	100	87	78	44	34	44
chr6_57393112_57398317	+	89.7778	191.333	53.3333	24.6667	186	215	173	52	77	31	17	28	29
chr18_45391430_45396935	-	89.6667	191.333	57.3333	20.3333	172	216	186	50	57	65	28	27	6
chr2_136505837_136519481	+	89.6667	116.667	112.333	40	115	106	129	123	103	111	76	6	38
chr2_175779786_175816930	-	89.6667	88	127.333	53.6667	104	83	77	127	84	171	62	41	58
chr5_73136305_73136585	+	89.6667	175.667	68.6667	24.6667	215	141	171	73	57	76	27	16	31
chr4_148867768_148887990	+	89.2222	166	56	45.6667	173	181	144	70	64	34	42	49	46
chr5_78734833_78752841	-	89.2222	49	132	86.6667	47	47	53	84	132	180	95	92	73
chr20_3888573_3893281	+	89.1111	80.3333	115.333	71.6667	66	72	103	58	101	187	60	95	60
chr16_89484692_89488713	-	89	174.333	35.3333	57.3333	182	166	175	34	40	32	84	51	37
chr19_50902108_50902741	+	89	52	128	87	44	55	57	135	125	124	81	75	105
chr17_59996761_60002460	-	88.7778	97.3333	90	79	114	76	102	57	67	146	97	84	56
chr15_56686363_56687032	+	88.5556	186	37	42.6667	162	213	183	43	31	37	45	44	39
chr8_15508206_15531345	+	88.5556	265.667	0	0	296	228	273	0	0	0	0	0	0
chr2_109463194_109473426	+	88.2222	92.3333	88	84.3333	106	62	109	82	54	128	92	89	72
chr1_8601273_8617582	-	87.8889	130.333	81.6667	51.6667	123	152	116	97	79	69	64	57	34
chr17_42231924_42232779	+	87.7778	78.3333	136.667	48.3333	100	72	63	148	127	135	44	57	44
chr21_35475134_35497780	+	87.6667	14.3333	147	101.667	14	18	11	121	192	128	79	132	94
chr21_40600426_40601362	-	87.3333	114.333	98.6667	49	138	101	104	76	111	109	64	28	55
chr14_102506573_102507010	+	87	93	140.667	27.3333	92	69	118	85	145	192	12	31	39
chr13_99890681_99896878	+	86.8889	89	49.3333	122.333	90	73	104	48	49	51	158	56	153
chr17_80828100_80858607	+	86.8889	43.6667	105.333	111.667	48	53	30	82	123	111	92	164	79
chr16_70497072_70497677	+	86.6667	35.6667	104.667	119.667	27	35	45	78	88	148	122	120	117
chr20_52773708_52788209	-	86.5556	0	259.667	0	0	0	0	265	237	277	0	0	0
chr5_179976931_179980471	+	86.4444	152.333	64.3333	42.6667	169	128	160	44	73	76	27	47	54
chr11_106849345_106856857	-	86.2222	258.667	0	0	256	248	272	0	0	0	0	0	0
chr17_62817885_62818511	-	86.2222	19	173.333	66.3333	28	20	9	112	162	246	88	59	52
chr22_41277774_41278181	+	86.2222	56	134.667	68	61	56	51	132	120	152	83	68	53
chr16_85667520_85667738	+	86	104	37.6667	116.333	99	134	79	40	16	57	127	114	108
chr2_61710092_61717911	-	85.8889	66.6667	155.667	35.3333	83	83	34	217	176	74	64	13	29
chr22_50810449_50832564	+	85.8889	153.333	90.6667	13.6667	141	143	176	134	42	96	15	9	17
chr17_75398141_75398785	+	85.5556	76	116.667	64	81	60	87	172	126	52	68	69	55
chr3_47770515_47814426	-	85.4444	67.3333	109.667	79.3333	86	41	75	130	74	125	66	115	57
chr11_108046973_108047817	-	85.2222	80.3333	103.333	72	101	72	68	74	134	102	73	79	64
chr8_59535779_59548105	-	85.1111	96	132.333	27	115	107	66	95	130	172	36	4	41
chr7_17908030_17937069	-	84.8889	128.333	70	56.3333	105	154	126	96	66	48	47	65	57
chr13_42385361_42393522	-	84.7778	93	96.3333	65	100	76	103	118	55	116	59	64	72
chr20_34302107_34313077	-	84.7778	72	123.333	59	49	88	79	110	120	140	25	81	71
chr11_72695133_72700142	-	84.4444	139.333	64.3333	49.6667	150	111	157	70	54	69	52	62	35
chr8_129021836_129022690	+	84.4444	97.6667	133	22.6667	97	111	85	130	116	153	25	25	18
chr5_38523521_38530768	-	83.8889	251.667	0	0	206	221	328	0	0	0	0	0	0
chr5_142416761_142437312	+	83.7778	47	125.333	79	40	37	64	125	103	148	107	67	63
chr11_120345269_120348235	+	83.5556	59.6667	109.333	81.6667	48	75	56	113	108	107	82	87	76
chr17_722679_729318	-	83.5556	44	192	14.6667	42	39	51	217	235	124	11	10	23
chr12_28458582_28544344	+	83.4444	214.333	18	18	213	199	231	25	18	11	33	11	10
chr17_44159807_44172067	-	83.4444	100.333	127.333	22.6667	101	100	100	117	163	102	33	18	17
chr11_20424465_20448411	+	83.3333	62.6667	86.3333	101	68	57	63	122	27	110	101	92	110
chr9_33953283_33973235	-	83.3333	57.3333	136.333	56.3333	41	67	64	151	111	147	44	62	63
chr10_74468041_74475660	+	83.2222	207.667	22	20	225	204	194	45	21	0	16	20	24
chr14_35331250_35331528	-	83.1111	155	42.6667	51.6667	188	137	140	28	32	68	43	46	66
chr11_18312989_18313566	-	83	132	92.6667	24.3333	166	129	101	64	106	108	38	18	17
chr17_35343916_35348156	+	82.8889	42	148.333	58.3333	29	65	32	188	110	147	36	83	56
chr17_46189393_46190763	+	82.8889	83.3333	129.333	36	50	90	110	161	160	67	40	34	34
chr7_22999875_23030758	-	82.8889	127.667	118.333	2.66667	122	133	128	88	94	173	3	0	5
chr18_12999420_13019205	+	82.6667	0	131.667	116.333	0	0	0	146	142	107	103	116	130
chr19_11230768_11231198	+	82	39.6667	115	91.3333	44	33	42	96	119	130	107	66	101
chr9_22046750_22056386	+	82	146	88	12	131	151	156	138	64	62	13	0	23
chr20_34304662_34313077	-	81.5556	81	119.333	44.3333	71	119	53	112	116	130	39	49	45
chr3_56661065_56662642	-	81.2222	63.3333	117.667	62.6667	65	65	60	120	86	147	73	47	68
chr8_141828376_141900868	-	81.2222	158.667	49.6667	35.3333	147	171	158	26	71	52	32	21	53
chr22_46085592_46136418	+	81.1111	135.333	73.6667	34.3333	149	88	169	96	60	65	39	30	34
chr13_96636058_96651561	-	81	123.667	30	89.3333	115	118	138	44	18	28	107	83	78
chr12_50821545_50822873	+	80.8889	64	86.6667	92	63	67	62	90	86	84	75	110	91
chr2_153431650_153437563	+	80.6667	160.333	18.3333	63.3333	163	161	157	40	0	15	54	90	46
chr4_151656410_151729550	-	80.6667	45	131.667	65.3333	41	65	29	123	121	151	44	86	66
chr10_89527430_89536184	-	80.5556	76.3333	42.6667	122.667	92	55	82	38	39	51	136	130	102
chr21_47801609_47805898	+	80.4444	132.667	57.3333	51.3333	111	155	132	67	72	33	49	56	49
chr3_5212188_5216099	+	80.4444	180.333	29.3333	31.6667	198	195	148	34	33	21	20	37	38
chr8_124349865_124351686	-	80.4444	60	87	94.3333	53	58	69	106	70	85	90	88	105
chr3_195101738_195112876	-	80.3333	131	88.3333	21.6667	132	117	144	63	116	86	26	19	20
chr1_21083659_21100103	-	79.8889	143.333	70.6667	25.6667	135	149	146	82	57	73	36	18	23
chr16_69729039_69729282	+	79.7778	46	154.333	39	33	54	51	121	195	147	25	53	39
chr8_42914235_42919358	+	79.7778	117.667	78.3333	43.3333	116	110	127	66	73	96	56	32	42
chr8_98817581_98837381	+	79.7778	131	46	62.3333	132	137	124	48	60	30	41	62	84
chr10_90653628_90665417	+	79.6667	97.3333	83	58.6667	68	129	95	100	68	81	45	43	88
chr6_105192035_105198347	-	79.6667	189.667	32.6667	16.6667	206	169	194	17	20	61	15	0	35
chr1_85816098_85824530	-	79.5556	136	95.3333	7.33333	132	148	128	95	101	90	15	0	7
chr12_46622936_46648719	-	79.4444	165	45.3333	28	188	130	177	62	32	42	24	36	24
chr20_25614685_25626284	+	79.4444	76.3333	84.6667	77.3333	96	76	57	67	69	118	85	87	60
chr20_7976673_7990962	-	79.4444	77	136	25.3333	69	81	81	112	142	154	34	24	18
chr19_47865733_47865950	+	79.3333	65	101.333	71.6667	66	58	71	83	93	128	78	84	53
chr4_1902353_1906105	+	79.2222	42.3333	105.333	90	41	36	50	65	92	159	106	49	115
chr2_148653870_148657467	+	79.1111	111.667	99.3333	26.3333	108	132	95	77	124	97	30	14	35
chr7_77407655_77408131	+	79.1111	50.6667	127	59.6667	50	56	46	96	146	139	75	50	54
chr1_246490503_246498776	-	79	148.667	65.6667	22.6667	110	144	192	82	74	41	32	14	22
chr13_98865474_98865667	+	79	38.3333	68.6667	130	28	38	49	53	108	45	88	187	115
chr5_61745754_61747760	+	79	96.3333	67.3333	73.3333	108	100	81	35	58	109	75	57	88
chr12_121220458_121222396	-	78.8889	187.333	34.3333	15	150	182	230	39	35	29	32	13	0
chr13_61013822_61034674	+	78.8889	91.6667	74	71	121	98	56	64	93	65	107	42	64
chr1_44773982_44804994	-	78.7778	83.6667	91.6667	61	99	63	89	69	94	112	83	40	60
chr19_19750894_19751380	-	78.6667	86.3333	82	67.6667	108	87	64	89	62	95	94	34	75
chr2_63660879_63667005	-	78.6667	123.667	73.3333	39	131	103	137	91	74	55	40	27	50
chr14_62188227_62188541	+	78.4444	137	63.3333	35	152	93	166	80	79	31	39	27	39
chr15_42553156_42560230	-	78.4444	131	48.3333	56	122	158	113	42	30	73	56	52	60
chr8_71126138_71128999	-	78.4444	180.667	24.6667	30	208	169	165	53	21	0	21	47	22
chr11_110007388_110008139	+	78.3333	71.3333	149.333	14.3333	69	80	65	163	125	160	7	19	17
chr20_16506737_16509085	-	78.2222	46	47.3333	141.333	57	43	38	51	46	45	93	177	154
chr2_9419446_9437574	+	78	35.3333	187.333	11.3333	40	37	29	200	157	205	10	9	15
chr7_128281257_128289036	+	78	0	203.667	30.3333	0	0	0	230	181	200	28	35	28
chr5_77711344_77717784	+	77.8889	108.333	84.3333	41	107	117	101	112	83	58	31	43	49
chr9_138741983_138742307	-	77.8889	107.667	59	67	108	102	113	78	49	50	44	62	95
chr11_34093273_34098189	+	77.7778	69.3333	121.667	42.3333	50	63	95	114	135	116	33	58	36
chr13_31789188_31803431	+	77.7778	60.3333	144.333	28.6667	58	40	83	167	141	125	47	14	25
chr14_69583083_69589077	-	77.6667	100.333	108	24.6667	125	75	101	75	133	116	35	14	25
chr2_159922408_159954346	+	77.2222	123.333	62	46.3333	141	110	119	36	83	67	49	58	32
chr19_5047487_5082515	+	76.7778	82	89	59.3333	108	70	68	86	101	80	53	89	36
chr20_30954187_30978970	+	76.7778	99.6667	102.667	28	89	105	105	92	112	104	16	35	33
chr17_38562636_38563194	-	76.6667	105.333	65.6667	59	109	101	106	49	63	85	83	54	40
chr5_95099212_95119667	+	76.6667	135.667	79.6667	14.6667	138	121	148	78	82	79	7	18	19
chr1_213251038_213290752	+	76.5556	137.333	58	34.3333	145	152	115	69	58	47	36	44	23
chr1_94360170_94367225	-	76.5556	98	119.667	12	89	107	98	128	113	118	17	10	9
chr1_10155519_10165802	+	76.4444	117.667	80.3333	31.3333	143	127	83	65	94	82	46	21	27
chr7_100410369_100410830	-	76.4444	64.6667	151.333	13.3333	103	41	50	130	191	133	13	0	27
chr9_77631184_77632364	-	76.4444	109.667	74.3333	45.3333	135	88	106	70	84	69	56	26	54
chr10_49609655_49618211	+	76.3333	123.667	86.6667	18.6667	135	108	128	102	58	100	24	0	32
chr3_169854207_169867032	-	76.3333	154.333	61.3333	13.3333	185	172	106	60	42	82	9	5	26
chr19_23556544_23557566	-	76.1111	137.333	43.3333	47.6667	126	179	107	28	66	36	45	58	40
chr10_225934_267296	+	76	64.6667	50.3333	113	70	61	63	50	47	54	181	77	81
chr16_28112779_28113266	-	75.7778	119.667	25.6667	82	146	79	134	36	27	14	96	81	69
chr19_18650181_18650530	-	75.6667	99	57.3333	70.6667	95	113	89	34	42	96	64	82	66
chr2_32142995_32157204	-	75.5556	110.667	71.6667	44.3333	100	126	106	61	96	58	62	52	19
chr1_21097423_21100103	-	75.2222	127.333	69	29.3333	109	145	128	71	76	60	13	46	29
chr17_1257505_1265302	-	75.1111	83	100.667	41.6667	86	79	84	94	117	91	43	35	47
chr20_32207323_32211102	+	75.1111	66	83	76.3333	73	76	49	90	65	94	95	59	75
chr10_96201653_96234540	+	75	114	78.6667	32.3333	123	112	107	76	43	117	37	27	33
chr11_75590923_75623083	+	74.7778	83.3333	62.6667	78.3333	125	62	63	36	63	89	74	83	78
chr20_60714131_60716000	-	74.4444	104.667	83.3333	35.3333	105	108	101	82	91	77	42	27	37
chr9_4823548_4827033	+	74.4444	80.3333	68.3333	74.6667	64	78	99	49	83	73	71	68	85
chr1_42730786_42776781	-	74.1111	106	70.6667	45.6667	136	103	79	113	67	32	38	35	64
chr3_101389974_101391057	-	74.1111	93.6667	80.3333	48.3333	89	91	101	79	81	81	50	66	29
chr9_98002931_98011651	-	74.1111	173	28	21.3333	171	180	168	39	45	0	11	39	14
chr16_87782279_87795646	-	74	41.6667	87	93.3333	52	52	21	119	94	48	136	99	45
chr16_29917109_29917448	+	73.8889	6.33333	213	2.33333	0	9	10	227	208	204	7	0	0
chr17_79813018_79813462	-	73.8889	55.3333	81	85.3333	49	49	68	90	78	75	108	103	45
chr22_42204879_42206295	+	73.8889	73.6667	69.6667	78.3333	89	73	59	62	72	75	101	80	54
chrX_67266836_67273652	-	73.8889	116.333	77.6667	27.6667	125	114	110	48	86	99	24	30	29
chr2_190656516_190682906	+	73.4444	62.6667	91.6667	66	54	63	71	63	83	129	63	53	82
chr7_158704241_158711560	+	73.3333	118.333	69.3333	32.3333	142	96	117	91	40	77	43	30	24
chr5_31448654_31451747	-	72.8889	112.333	35.6667	70.6667	114	114	109	39	54	14	97	51	64
chr18_19345733_19359646	+	72.3333	134.333	65.3333	17.3333	130	138	135	84	60	52	20	0	32
chr6_139264650_139265759	-	72.3333	68	68.6667	80.3333	73	58	73	89	65	52	83	88	70
chr9_4286038_4286523	-	72.1111	21.3333	187.667	7.33333	19	27	18	198	169	196	6	0	16
chr1_19244856_19246267	-	72	0	179.667	36.3333	0	0	0	148	190	201	15	59	35
chr3_128525215_128526514	+	72	100.667	81.3333	34	87	139	76	70	107	67	30	41	31
chr3_48215774_48219478	-	71.8889	56.3333	106.333	53	70	44	55	88	106	125	44	43	72
chr6_86227474_86239993	-	71.8889	54.3333	114	47.3333	53	66	44	102	149	91	42	41	59
chr18_8718422_8720494	+	71.7778	75.6667	42	97.6667	90	67	70	47	24	55	95	86	112
chr2_206305094_206305396	+	71.7778	185	30.3333	0	205	171	179	17	24	50	0	0	0
chr2_44931422_44942492	+	71.7778	107.667	75.6667	32	107	108	108	119	53	55	32	44	20
chr11_36248635_36248980	+	71.6667	128	54	33	136	115	133	42	62	58	38	20	41
chr1_225742608_225755116	-	71.4444	186	24	4.33333	195	189	174	17	8	47	13	0	0
chr6_146209156_146216113	-	71.2222	138.667	21	54	172	105	139	41	11	11	64	68	30
chr11_63426233_63426724	-	71	131.667	75.3333	6	99	141	155	116	67	43	6	0	12
chr20_56846419_56847931	-	70.8889	88.3333	104.667	19.6667	85	84	96	86	106	122	14	11	34
chr7_5680785_5692141	-	70.8889	45	138.667	29	53	38	44	138	123	155	37	32	18
chr9_138905045_138908275	-	70.8889	119.333	54	39.3333	118	129	111	25	80	57	47	28	43
chr11_47444125_47444524	-	70.5556	60.3333	109	42.3333	63	57	61	111	93	123	74	34	19
chr1_51253672_51267349	-	70.4444	121.333	47	43	170	92	102	72	37	32	38	57	34
chr8_37623044_37623873	+	70.2222	119.333	48.3333	43	110	123	125	45	46	54	38	25	66
chr5_138614016_138614818	+	69.8889	40.3333	108.333	61	47	39	35	57	172	96	34	59	90
chr11_86267595_86270865	-	69.7778	91.3333	94.6667	23.3333	71	80	123	102	135	47	25	34	11
chr4_151719233_151729550	-	69.7778	90	79	40.3333	120	65	85	85	105	47	43	42	36
chr7_90355881_90356126	+	69.7778	206.333	3	0	188	237	194	9	0	0	0	0	0
chr7_129679304_129688984	-	69.3333	37.3333	114.667	56	38	50	24	88	73	183	55	47	66
chr7_156549087_156556489	-	69.3333	76.3333	97	34.6667	92	55	82	102	98	91	24	31	49
chr1_1192372_1192690	-	69.2222	31.6667	73.6667	102.333	30	24	41	68	107	46	121	111	75
chr15_25650608_25660989	-	69.1111	92.3333	55.6667	59.3333	82	96	99	55	73	39	65	53	60
chr18_76953183_76974038	+	69.1111	101.667	63.6667	42	89	91	125	39	59	93	30	50	46
chr2_61709515_61717911	-	68.6667	50	97	59	58	32	60	64	107	120	86	42	49
chr13_114806476_114839312	-	68.5556	41.3333	96.6667	67.6667	45	42	37	113	89	88	51	99	53
chr15_90414707_90432372	-	68.4444	100.667	52	52.6667	99	123	80	44	59	53	49	61	48
chr16_30740287_30740893	+	68.4444	67.3333	93.3333	44.6667	80	75	47	69	90	121	45	28	61
chr17_80721841_80739597	+	68.4444	60	125.667	19.6667	60	43	77	146	105	126	26	17	16
chr8_48196617_48206619	+	68.4444	107.667	59.6667	38	90	106	127	53	25	101	25	51	38
chr1_246600450_246603426	-	68.3333	113.667	54	37.3333	123	122	96	67	48	47	46	19	47
chr3_155551257_155560408	-	68.3333	91.3333	78.6667	35	89	106	79	126	51	59	15	52	38
chr22_46096162_46114373	+	68.2222	142.667	30.6667	31.3333	180	129	119	33	24	35	46	34	14
chr3_33725851_33731424	-	68.2222	150.333	43	11.3333	129	182	140	67	40	22	17	0	17
chr4_103446669_103459113	+	68.2222	139.667	60	5	145	127	147	61	56	63	0	0	15
chr1_155695173_155695810	+	68.1111	111.667	42.6667	50	114	102	119	35	52	41	71	45	34
chr2_45773871_45789895	-	68.1111	80.6667	92.6667	31	74	68	100	86	69	123	24	46	23
chr3_133894453_133914026	-	68	69.6667	92.3333	42	65	58	86	140	69	68	25	62	39
chr6_82920531_82922510	-	68	72.6667	80.6667	50.6667	64	85	69	74	74	94	38	66	48
chr1_8555123_8617582	-	67.8889	75.6667	74.6667	53.3333	71	81	75	39	104	81	58	60	42
chr6_170852689_170858201	-	67.6667	66.6667	92.3333	44	70	86	44	122	55	100	44	46	42
chr1_42730786_42744455	-	67.5556	111.667	53.6667	37.3333	108	80	147	81	46	34	46	29	37
chr17_30310018_30315516	+	67.4444	34	113	55.3333	33	31	38	135	116	88	30	97	39
chr12_116668238_116675510	-	67.3333	29.6667	137.333	35	33	25	31	111	146	155	39	50	16
chr6_155095123_155116273	+	67.2222	13	101.333	87.3333	13	7	19	92	135	77	96	51	115
chr8_132952746_132958880	+	67.2222	87.6667	52.3333	61.6667	88	84	91	20	93	44	63	54	68
chrX_71681854_71684581	-	67.2222	124	56.6667	21	149	114	109	23	88	59	17	29	17
chr7_30661009_30662078	+	67.1111	67	84.6667	49.6667	73	81	47	88	88	78	38	60	51
chr1_212502477_212506940	+	66.8889	157.333	37.6667	5.66667	162	128	182	37	38	38	0	0	17
chr8_71071740_71075089	-	66.8889	114.333	62.6667	23.6667	137	90	116	41	77	70	21	18	32
chr1_212218002_212220759	+	66.7778	64.6667	69	66.6667	69	58	67	72	72	63	87	63	50
chr2_38812786_38818790	-	66.7778	61.6667	118.667	20	60	77	48	120	108	128	12	17	31
chr3_23541099_23574192	+	66.7778	89.3333	98.3333	12.6667	94	64	110	109	94	92	11	0	27
chr7_22347958_22357656	-	66.7778	0	200.333	0	0	0	0	179	224	198	0	0	0
chr8_103372299_103373854	-	66.7778	75	77	48.3333	60	90	75	81	105	45	44	44	57
chr5_118264232_118280344	-	66.5556	151	34.6667	14	156	146	151	34	41	29	6	17	19
chr5_72157635_72161556	+	66.5556	157	25.3333	17.3333	196	127	148	21	36	19	19	16	17
chr2_228356263_228389631	+	66.4444	176.333	16	7	161	200	168	25	23	0	11	0	10
chr2_101666863_101676001	-	66.2222	54.3333	109.667	34.6667	54	45	64	127	76	126	17	62	25
chr10_46158990_46159290	-	66.1111	98	54.6667	45.6667	105	82	107	38	39	87	37	46	54
chr16_88008654_88017865	+	66.1111	68	91.3333	39	84	79	41	83	119	72	36	44	37
chr3_98600384_98611450	-	66.1111	1.33333	139.333	57.6667	0	0	4	201	92	125	38	72	63
chr17_80992911_81006661	-	66	176	0	22	176	140	212	0	0	0	27	22	17
chr4_83793097_83796975	-	65.7778	74.3333	75.6667	47.3333	54	96	73	83	72	72	53	54	35
chr2_106774514_106782539	-	65.6667	37	100.333	59.6667	41	43	27	78	134	89	40	59	80
chrX_53641495_53642796	-	65.6667	55	92.6667	49.3333	47	67	51	73	87	118	38	40	70
chr3_98600384_98600611	-	65.5556	2	138	56.6667	0	6	0	104	99	211	17	53	100
chr9_102677460_102691125	+	65.5556	98	39.3333	59.3333	95	88	111	32	48	38	49	75	54
chr17_47388674_47389404	-	65.4444	111.667	45.3333	39.3333	101	114	120	53	52	31	48	37	33
chr8_71550050_71553285	-	65.2222	176	15.6667	4	160	175	193	36	11	0	6	0	6
chr1_176132005_176153828	-	65.1111	123	42.3333	30	125	108	136	38	49	40	24	31	35
chr2_190656516_190670480	+	65.1111	52.6667	62.3333	80.3333	44	71	43	90	53	44	62	107	72
chr3_138400809_138403645	-	65.1111	68.3333	68	59	59	101	45	64	105	35	50	66	61
chr2_176835492_176860374	-	65	157.667	29.3333	8	135	189	149	32	16	40	15	9	0
chr21_32537279_32567621	-	65	35	150	10	44	25	36	110	141	199	20	0	10
chr15_75215989_75219228	-	64.8889	142.333	41.6667	10.6667	121	172	134	24	38	63	16	10	6
chr19_13039156_13039661	-	64.7778	52	73.3333	69	39	64	53	89	56	75	76	52	79
chr11_65661485_65664477	-	64.6667	17.3333	144.333	32.3333	19	25	8	170	134	129	23	39	35
chr13_51501543_51523641	+	64.6667	33.6667	70.6667	89.6667	35	21	45	66	46	100	78	73	118
chr5_167927596_167929110	+	64.5556	126.333	36.3333	31	113	132	134	56	12	41	38	35	20
chr4_146767108_146770713	-	64.4444	30.6667	136	26.6667	22	30	40	148	159	101	23	25	32
chr5_133493398_133509713	-	64.3333	119.667	37.6667	35.6667	139	128	92	48	65	0	30	49	28
chr11_61205097_61205585	+	64.2222	38.3333	86.6667	67.6667	34	37	44	50	91	119	61	59	83
chr13_28748409_28752072	+	64.2222	97.6667	79	16	93	119	81	84	61	92	7	22	19
chr15_75219107_75221573	-	64.2222	71.3333	66.3333	55	59	84	71	44	102	53	46	50	69
chr14_76642966_76662315	+	64.1111	84.6667	74	33.6667	113	62	79	57	64	101	44	29	28
chr5_145634506_145638156	+	64	73	79.3333	39.6667	65	72	82	57	74	107	46	32	41
chrX_2184781_2209644	-	63.8889	93.3333	49	49.3333	105	76	99	56	34	57	68	28	52
chr4_39915231_39927553	-	63.7778	156	12.6667	22.6667	129	175	164	19	10	9	42	19	7
chr9_130285958_130294057	-	63.7778	183.667	3	4.66667	178	190	183	0	9	0	7	0	7
chr17_36517594_36523933	+	63.6667	52.6667	97.6667	40.6667	51	66	41	126	125	42	40	32	50
chr19_3660964_3661999	-	63.6667	36	79	76	37	29	42	58	95	84	65	94	69
chr9_33960824_33963789	-	63.6667	14.6667	147.667	28.6667	26	18	0	72	166	205	16	45	25
chr7_140055468_140058585	-	63.4444	114	38.6667	37.6667	140	97	105	23	52	41	33	45	35
chr10_74474869_74475660	+	63.3333	173.667	7.66667	8.66667	227	162	132	6	0	17	11	15	0
chr9_96238538_96261168	+	63.3333	110.333	62.3333	17.3333	120	104	107	80	49	58	13	19	20
chr7_17885218_17890587	-	63.2222	73.6667	45.3333	70.6667	77	67	77	44	38	54	57	61	94
chr4_25848916_25849486	-	63.1111	94	59.3333	36	103	92	87	29	67	82	55	32	21
chr1_200729967_200730226	+	63	131.333	39.6667	18	103	141	150	57	32	30	26	20	8
chr17_58700882_58711338	+	63	33.6667	96.3333	59	49	16	36	130	96	63	54	63	60
chr19_4941540_4941943	+	63	41.3333	81.6667	66	29	36	59	111	115	19	75	45	78
chr9_95030456_95032265	-	62.7778	84	47.6667	56.6667	108	66	78	31	59	53	82	47	41
chr19_18285850_18286507	+	62.2222	53.3333	67.6667	65.6667	51	62	47	69	111	23	84	52	61
chr12_129293333_129299615	-	62	51	86	49	55	42	56	96	59	103	53	54	40
chr15_57383987_57387361	+	62	104.667	35.6667	45.6667	132	103	79	52	33	22	34	56	47
chr21_32554738_32567621	-	62	35	141.333	9.66667	36	35	34	96	129	199	15	0	14
chr7_24663285_24681487	+	62	68	30.6667	87.3333	72	71	61	30	29	33	83	100	79
chr11_120916383_120930794	+	61.8889	82	59.3333	44.3333	87	93	66	69	45	64	53	50	30
chr17_35640168_35646430	-	61.8889	103.333	50.3333	32	81	111	118	75	49	27	19	32	45
chr7_102106264_102106717	+	61.7778	35.3333	102	48	34	29	43	63	118	125	62	31	51
chr16_89484692_89497734	-	61.4444	97	45.6667	41.6667	89	89	113	11	48	78	45	44	36
chr2_43725972_43755127	-	61.4444	21	121	42.3333	24	22	17	146	126	91	54	49	24
chr14_91444650_91467503	-	61.3333	65.3333	116.667	2	37	88	71	115	152	83	4	0	2
chr17_982570_1003975	-	61.2222	10.3333	93.6667	79.6667	11	13	7	50	110	121	77	72	90
chr3_183361268_183369064	+	61.2222	91	86.6667	6	98	87	88	73	60	127	8	0	10
chr2_9490937_9508648	+	61.1111	43	115	25.3333	28	59	42	84	110	151	25	36	15
chr20_33057853_33069011	+	61.1111	39	81.3333	63	31	19	67	90	109	45	70	70	49
chr7_30395344_30405911	+	61	127	55	1	108	141	132	49	66	50	3	0	0
chr1_52293468_52299842	-	60.8889	73.6667	86	23	69	79	73	78	24	156	11	35	23
chr11_129979324_129980556	+	60.8889	69.3333	76	37.3333	44	84	80	77	80	71	45	39	28
chr21_37775056_37783902	+	60.8889	16	107.667	59	15	19	14	96	128	99	80	39	58
chr2_36623757_36669878	+	60.7778	101	80.3333	1	121	77	105	66	80	95	3	0	0
chr7_16298015_16317851	-	60.7778	52.6667	84.6667	45	47	62	49	62	118	74	52	41	42
chr1_51926763_51930998	-	60.6667	83.6667	71.3333	27	103	61	87	84	59	71	29	31	21
chr7_47384353_47385954	-	60.5556	83.3333	18	80.3333	112	74	64	19	21	14	109	73	59
chr4_148860976_148887990	+	60.4444	69.3333	81.6667	30.3333	61	77	70	70	60	115	28	29	34
chrX_80047353_80049271	-	60.4444	113.667	32.6667	35	126	87	128	9	24	65	30	33	42
chr4_25334805_25335610	+	60.2222	75	49	56.6667	77	64	84	29	57	61	59	70	41
chr15_72837161_72864506	+	59.8889	106.333	67	6.33333	109	126	84	57	49	95	4	6	9
chr16_69752026_69752437	-	59.8889	61	66	52.6667	45	66	72	92	60	46	55	40	63
chr5_109049221_109051965	+	59.8889	92.6667	66	21	104	81	93	60	50	88	34	18	11
chr3_67546222_67548719	-	59.7778	105.333	59.3333	14.6667	118	116	82	32	53	93	14	0	30
chr17_28011581_28030080	-	59.6667	119.333	35.3333	24.3333	109	128	121	45	30	31	28	20	25
chr5_76342172_76344097	+	59.6667	101.333	54	23.6667	95	105	104	79	42	41	26	14	31
chr10_15858834_15889942	-	59.4444	125	44.6667	8.66667	133	97	145	0	51	83	5	0	21
chr5_142779221_142780417	-	59.4444	178.333	0	0	130	196	209	0	0	0	0	0	0
chr8_141840571_141900868	-	59.4444	137	14	27.3333	146	114	151	23	19	0	32	11	39
chr10_7285520_7327916	-	59.3333	178	0	0	188	184	162	0	0	0	0	0	0
chr1_167921038_167944253	+	59.2222	113.333	27.6667	36.6667	118	109	113	50	33	0	36	23	51
chr19_6230581_6270770	-	59	94.3333	57	25.6667	103	86	94	68	27	76	43	0	34
chr8_48192450_48206619	+	59	91	65	21	90	80	103	36	77	82	9	8	46
chr9_33351558_33352717	+	59	43.6667	96	37.3333	46	33	52	105	54	129	53	25	34
chr1_94953098_94956803	+	58.8889	92	29.3333	55.3333	114	79	83	32	48	8	50	41	75
chr10_120488807_120489922	-	58.7778	92.3333	66	18	90	85	102	64	85	49	24	14	16
chr11_46098305_46105853	-	58.7778	88.6667	66	21.6667	90	95	81	50	49	99	16	38	11
chr1_21415631_21437876	-	58.6667	131.333	22.6667	22	125	158	111	38	30	0	20	27	19
chr21_37619815_37620866	+	58.6667	25	126.667	24.3333	26	27	22	126	85	169	18	25	30
chr5_109049221_109065214	+	58.5556	82.6667	60.3333	32.6667	69	100	79	45	74	62	38	29	31
chr15_72300167_72320134	-	58.4444	81.3333	75.6667	18.3333	74	91	79	78	85	64	11	17	27
chr14_51107468_51111732	-	58.1111	98	53	23.3333	88	115	91	33	37	89	18	33	19
chr19_52785364_52786666	+	58	18.3333	79	76.6667	24	14	17	78	95	64	62	74	94
chr1_21076216_21100103	-	57.8889	94	47.6667	32	98	92	92	38	33	72	22	36	38
chr17_40650942_40653322	+	57.8889	44	104	25.6667	41	23	68	75	105	132	37	40	0
chr8_106431372_106456609	+	57.8889	0	173.667	0	0	0	0	138	180	203	0	0	0
chrX_133607389_133632714	+	57.8889	85.6667	25.3333	62.6667	97	80	80	8	33	35	52	75	61
chr4_106345353_106377902	-	57.7778	92	59.3333	22	105	83	88	46	80	52	23	43	0
chr12_22811948_22826594	+	57.6667	61.3333	30.3333	81.3333	61	59	64	38	44	9	119	77	48
chr2_215632206_215646233	-	57.6667	84.6667	76	12.3333	79	90	85	112	63	53	15	0	22
chr8_141710990_141716304	-	57.5556	74	35.6667	63	62	78	82	16	49	42	68	67	54
chr9_102814699_102822454	-	57.5556	103.333	40.6667	28.6667	112	92	106	31	59	32	27	25	34
chr12_12332744_12340053	-	57.4444	27	74	71.3333	20	19	42	126	69	27	100	50	64
chr17_34910661_34923615	+	57.4444	40	103.667	28.6667	43	44	33	86	129	96	33	33	20
chr13_103275227_103280274	+	57.3333	25	57.3333	89.6667	23	29	23	58	40	74	88	109	72
chr17_80828100_80851508	+	57.3333	49	66.3333	56.6667	38	76	33	58	76	65	59	53	58
chr2_236706403_236715975	+	57.3333	36.3333	122.667	13	35	41	33	117	144	107	28	0	11
chr7_22306583_22357656	-	57.2222	0	171.667	0	0	0	0	153	176	186	0	0	0
chr7_47474880_47481653	-	57.2222	24.6667	59.6667	87.3333	29	26	19	46	101	32	116	69	77
chr11_128993341_128997200	-	57.1111	39.6667	75.6667	56	39	33	47	80	80	67	77	39	52
chr3_48726971_48728915	-	57.1111	76.6667	54.3333	40.3333	75	86	69	26	47	90	49	36	36
chr3_68040704_68055887	+	57.1111	171.333	0	0	195	167	152	0	0	0	0	0	0
chr5_74109665_74137504	-	57.1111	51.6667	78.3333	41.3333	53	52	50	108	84	43	66	29	29
chr2_44436349_44445676	+	57	84.3333	72.6667	14	88	70	95	92	47	79	13	15	14
chr3_196812451_196842954	-	57	32.6667	125.667	12.6667	13	54	31	118	89	170	9	18	11
chr22_46085592_46125470	+	56.8889	105.667	55.6667	9.33333	122	92	103	48	67	52	7	0	21
chr3_195101738_195133645	-	56.8889	117.667	43.3333	9.66667	119	126	108	54	61	15	7	9	13
chr3_113207792_113225452	-	56.7778	72.6667	52.6667	45	76	85	57	40	24	94	42	27	66
chr9_33960824_33973235	-	56.6667	16	108.333	45.6667	34	14	0	103	107	115	30	50	57
chr6_24416625_24418806	+	56.5556	71.3333	68	30.3333	87	46	81	69	50	85	34	25	32
chr19_34954931_34957919	+	56.4444	47.3333	71.6667	50.3333	47	55	40	81	54	80	56	60	35
chr21_47768926_47769734	+	56.4444	78.6667	52	38.6667	76	96	64	48	68	40	35	39	42
chr5_61846194_61857084	+	56.4444	80	51	38.3333	92	75	73	43	90	20	45	43	27
chr12_28408514_28460682	+	56.2222	106	28.6667	34	106	80	132	33	27	26	25	30	47
chr2_170728746_170735084	+	56.2222	73	83.6667	12	79	85	55	115	63	73	8	13	15
chr5_134388144_134411078	+	56.2222	104	38.3333	26.3333	93	121	98	34	26	55	11	34	34
chrX_14868627_14877456	-	56.2222	56	74.6667	38	69	37	62	112	61	51	44	33	37
chr4_48686690_48712715	-	56.1111	89.3333	40.3333	38.6667	101	104	63	65	33	23	59	17	40
chr10_12257739_12280484	+	55.8889	77.3333	34.6667	55.6667	98	58	76	33	20	51	51	58	58
chr14_90397885_90398971	-	55.8889	88.6667	65.3333	13.6667	82	93	91	47	55	94	5	11	25
chr19_12923897_12924379	+	55.8889	49.6667	60.3333	57.6667	63	49	37	63	35	83	55	54	64
chr1_33413823_33415375	-	55.7778	72.3333	69	26	81	64	72	58	77	72	39	27	12
chr3_141231005_141259451	+	55.7778	42.6667	108.667	16	40	43	45	70	176	80	15	13	20
chr2_209150450_209153542	+	55.6667	98	47.6667	21.3333	105	106	83	47	58	38	22	28	14
chr2_32142995_32168452	-	55.6667	95.6667	51	20.3333	78	88	121	32	55	66	25	17	19
chr2_168920010_168931741	-	55.5556	49.6667	96.3333	20.6667	49	59	41	122	62	105	25	20	17
chr14_71880665_71933964	+	55.4444	128.333	21.6667	16.3333	110	129	146	9	21	35	14	24	11
chr7_65592691_65599361	+	55.4444	86	40.3333	40	82	88	88	34	32	55	29	43	48
chr16_16101673_16110478	+	55.2222	124.333	26	15.3333	126	125	122	25	31	22	17	16	13
chr3_57569625_57570191	-	55.2222	83.3333	73.3333	9	69	78	103	53	67	100	8	19	0
chr5_111594926_111602027	-	55.2222	74.6667	91	0	66	87	71	83	94	96	0	0	0
chr6_20546577_20548936	+	55.2222	60.6667	51.3333	53.6667	57	70	55	42	72	40	55	56	50
chr12_69983265_69985939	+	55.1111	49.3333	60.6667	55.3333	48	42	58	32	39	111	42	64	60
chr16_67662273_67663436	+	55.1111	30	51	84.3333	35	29	26	31	42	80	115	92	46
chr5_135483521_135489852	+	55.1111	36	108.333	21	52	33	23	119	81	125	24	28	11
chr20_62559688_62562375	+	55	47.6667	64.3333	53	44	79	20	59	44	90	62	47	50
chr14_102486230_102489217	+	54.8889	62.3333	90	12.3333	70	57	60	68	87	115	17	15	5
chr12_65720606_65762806	+	54.7778	116.667	44.3333	3.33333	123	121	106	51	22	60	3	0	7
chr9_6849507_6893232	+	54.7778	27.6667	58.3333	78.3333	27	34	22	66	43	66	74	62	99
chrX_53627078_53631795	-	54.7778	32.6667	89.6667	42	43	41	14	90	91	88	48	31	47
chr11_70200407_70202360	+	54.5556	18.3333	105.333	40	15	18	22	84	90	142	34	43	43
chr14_50136242_50141145	-	54.5556	93	17.3333	53.3333	71	108	100	15	37	0	54	53	53
chr15_72810408_72848248	+	54.5556	75.3333	32	56.3333	72	78	76	39	25	32	50	39	80
chr11_14793483_14810788	+	54.4444	25.3333	11	127	24	23	29	15	12	6	137	126	118
chr17_26490569_26499644	+	54.4444	42.3333	117.667	3.33333	30	53	44	127	95	131	8	0	2
chr2_183993015_183998351	+	54.4444	65.3333	43.6667	54.3333	79	62	55	50	37	44	53	53	57
chr3_149563798_149619949	+	54.4444	64.3333	89	10	71	69	53	98	102	67	10	14	6
chr9_139115853_139118720	-	54.4444	24	49.6667	89.6667	21	33	18	46	55	48	97	75	97
chr10_74100547_74100928	-	54.2222	43.3333	72	47.3333	39	51	40	111	82	23	36	51	55
chr1_207989274_207990759	-	54.1111	109	27.3333	26	102	117	108	12	31	39	43	8	27
chr1_23397718_23398690	+	54.1111	60	21.3333	81	56	78	46	14	14	36	46	93	104
chr17_41576230_41577471	+	54.1111	36.6667	78	47.6667	27	47	36	77	82	75	38	65	40
chr1_180971742_180974599	-	54	37.3333	83.3333	41.3333	48	32	32	83	69	98	33	43	48
chr11_68153784_68157520	+	54	4	93.3333	64.6667	0	10	2	106	108	66	98	40	56
chr2_169547544_169574488	+	54	36.3333	73.3333	52.3333	38	45	26	67	68	85	54	60	43
chr14_91947920_91952074	-	53.8889	79.3333	67.3333	15	84	94	60	43	66	93	6	8	31
chr11_62650380_62653080	+	53.7778	70.6667	67.6667	23	72	70	70	58	58	87	26	32	11
chr22_32874968_32875262	+	53.7778	78.6667	53	29.6667	89	83	64	108	36	15	25	19	45
chr12_27149675_27152609	-	53.6667	34	56.3333	70.6667	34	26	42	56	64	49	99	51	62
chrX_1404671_1409402	+	53.6667	159	2	0	156	168	153	0	6	0	0	0	0
chr6_155108995_155116273	+	53.4444	27.6667	68.6667	64	27	27	29	65	41	100	73	66	53
chr17_67270100_67280213	-	53.3333	90.6667	55.6667	13.6667	83	87	102	17	64	86	9	32	0
chr19_55610152_55614936	-	53.3333	56	39	65	40	80	48	21	28	68	79	55	61
chr20_37612342_37623523	+	53.3333	58.6667	65.6667	35.6667	46	93	37	72	52	73	25	45	37
chr9_14146688_14179779	-	53.3333	41.6667	118.333	0	43	31	51	93	94	168	0	0	0
chr18_56363598_56367823	+	53.2222	76.6667	66	17	88	47	95	74	23	101	19	16	16
chr6_42941741_42942776	-	53.2222	30.3333	74	55.3333	43	28	20	114	66	42	66	54	46
chrX_23739998_23754133	-	53.2222	70.3333	58.3333	31	61	80	70	46	57	72	32	36	25
chr5_21491430_21501935	+	53.1111	122.667	24.3333	12.3333	107	151	110	21	36	16	26	0	11
chr7_23650790_23651172	+	53.1111	92.6667	34.3333	32.3333	75	94	109	27	22	54	25	48	24
chr10_11893996_11894214	+	53	80.3333	78.6667	0	93	80	68	48	90	98	0	0	0
chr2_24205766_24207701	+	52.8889	29.6667	74	55	17	43	29	72	56	94	33	88	44
chr7_140402666_140404763	+	52.8889	73.6667	47	38	72	72	77	60	53	28	30	37	47
chr15_101775287_101775782	-	52.5556	66	81.6667	10	68	73	57	69	96	80	11	4	15
chr7_716866_720363	-	52.5556	13.6667	110.333	33.6667	22	10	9	72	136	123	35	31	35
chr9_99537070_99538527	-	52.4444	116	27	14.3333	125	95	128	12	44	25	19	13	11
chr3_3819409_3830758	-	52.3333	37.3333	59.6667	60	38	23	51	52	73	54	65	53	62
chr7_810108_814799	+	52.3333	12	91.3333	53.6667	11	14	11	95	68	111	74	39	48
chr3_52960047_52962357	-	52.2222	57	56.3333	43.3333	61	72	38	62	44	63	56	37	37
chr1_146724278_146731572	+	52.1111	77	48	31.3333	92	60	79	31	52	61	0	66	28
chr1_41578955_41608784	-	52.1111	81.3333	62	13	75	87	82	55	57	74	13	26	0
chr17_60111148_60112969	-	52.1111	82.3333	46.6667	27.3333	82	83	82	47	36	57	36	18	28
chr20_61291764_61292527	+	52.1111	0	145	11.3333	0	0	0	144	170	121	17	0	17
chr16_47143394_47165936	-	52	42	81	33	32	38	56	66	55	122	28	26	45
chr6_150092298_150094305	+	52	55	31	70	76	42	47	41	28	24	71	51	88
chr13_114174931_114193822	+	51.8889	21	55.3333	79.3333	30	17	16	88	38	40	95	67	76
chr13_28748409_28771483	+	51.8889	38	89.3333	28.3333	34	37	43	69	81	118	19	30	36
chr14_73614503_73614802	+	51.8889	79.3333	45.6667	30.6667	64	81	93	44	39	54	32	22	38
chr2_69565030_69565697	-	51.8889	60	65.3333	30.3333	54	41	85	56	74	66	29	48	14
chr2_32108455_32157204	-	51.6667	69.3333	63.6667	22	40	79	89	78	50	63	32	0	34
chr8_131164982_131181313	-	51.6667	16.3333	138.667	0	18	20	11	131	127	158	0	0	0
chr6_138794443_138817508	-	51.5556	34.6667	101.333	18.6667	37	43	24	128	82	94	20	12	24
chr15_49528048_49584734	+	51.4444	63	55	36.3333	53	49	87	61	75	29	66	43	0
chr6_56564451_56600087	-	51.4444	115.333	13	26	122	114	110	20	19	0	6	26	46
chr1_40654727_40668286	+	51.3333	78	66.6667	9.33333	51	117	66	69	42	89	8	10	10
chr1_44750507_44785416	-	51.3333	94.6667	35.3333	24	79	104	101	37	52	17	35	15	22
chrX_72797243_72804408	+	51.3333	91.3333	38.6667	24	98	89	87	46	20	50	17	27	28
chr7_156516806_156619438	-	51.2222	85.6667	50.3333	17.6667	96	88	73	51	41	59	29	16	8
chr11_18305342_18307006	-	51.1111	66.6667	57.6667	29	54	66	80	62	61	50	12	27	48
chr2_174223440_174224219	+	51.1111	45.6667	47	60.6667	44	46	47	34	71	36	63	62	57
chr15_76566753_76588078	-	51	79.3333	23.6667	50	61	88	89	34	37	0	52	74	24
chr2_11426665_11428575	-	51	79	74	0	88	68	81	91	66	65	0	0	0
chr2_122514816_122519100	+	51	73	45.3333	34.6667	78	66	75	52	37	47	28	41	35
chr10_93902786_93940776	-	50.7778	131	11	10.3333	141	137	115	8	5	20	10	0	21
chr11_68571468_68575106	-	50.7778	22	66	64.3333	11	26	29	95	44	59	100	57	36
chr12_50821545_50829407	+	50.7778	24.6667	89.3333	38.3333	21	22	31	64	95	109	34	24	57
chr7_156589083_156619438	-	50.7778	71.6667	56.6667	24	82	65	68	58	38	74	24	39	9
chr10_116879949_116889297	+	50.6667	25	127	0	28	33	14	99	110	172	0	0	0
chr2_172782047_172809519	+	50.6667	112.333	23.6667	16	107	116	114	28	21	22	15	18	15
chr3_169863211_169867032	-	50.6667	114.333	25.3333	12.3333	145	104	94	7	13	56	15	22	0
chr9_74817487_74834422	+	50.6667	146.667	0	5.33333	154	142	144	0	0	0	16	0	0
chr5_130883740_130940386	-	50.5556	63.6667	78.6667	9.33333	58	82	51	81	114	41	0	13	15
chr14_23395342_23396023	-	50.4444	52	47.6667	51.6667	62	57	37	65	37	41	47	50	58
chr15_100821434_100871259	-	50.4444	0	146.333	5	0	0	0	127	165	147	6	0	9
chr3_129599152_129599402	-	50.4444	57.6667	60	33.6667	48	61	64	48	88	44	21	40	40
chr6_89554076_89563483	-	50.4444	21.6667	96	33.6667	23	11	31	99	62	127	25	40	36
chr2_37543380_37544322	-	50.3333	16.3333	121	13.6667	4	24	21	155	89	119	9	22	10
chr3_72881520_72893574	-	50.2222	80.6667	60.3333	9.66667	95	84	63	75	40	66	14	0	15
chr2_170401231_170413807	-	50	18.3333	60	71.6667	17	19	19	52	43	85	77	85	53
chr15_73052748_73067438	-	49.8889	58.3333	64	27.3333	57	57	61	46	46	100	21	47	14
chr19_5039847_5041262	+	49.8889	56.3333	67.6667	25.6667	63	60	46	59	103	41	50	19	8
chr2_109455641_109473426	+	49.8889	57.3333	71	21.3333	63	61	48	59	63	91	19	29	16
chr20_30954187_30989835	+	49.8889	64.6667	62	23	72	86	36	48	72	66	19	0	50
chr1_1735858_1749314	-	49.7778	75	43.6667	30.6667	71	87	67	32	41	58	43	20	29
chr1_198201683_198233365	+	49.6667	60.6667	61	27.3333	50	62	70	28	43	112	33	12	37
chr1_31465237_31468067	-	49.6667	52.3333	53.6667	43	53	50	54	50	73	38	23	40	66
chr1_58971732_59002413	-	49.5556	69.6667	57	22	75	48	86	49	48	74	19	32	15
chr2_24786773_24807429	+	49.5556	28.6667	95.6667	24.3333	22	19	45	114	114	59	21	11	41
chr5_179956275_179980471	+	49.5556	94.6667	24	30	80	92	112	0	6	66	32	43	15
chr12_53670404_53671011	+	49.4444	43.6667	76.3333	28.3333	45	42	44	47	72	110	33	42	10
chr3_171830242_171944737	+	49.4444	119.333	29	0	114	124	120	27	28	32	0	0	0
chr2_9048751_9098771	-	49.3333	92	19.3333	36.6667	93	84	99	31	27	0	32	58	20
chr3_47476498_47484581	-	49.2222	52.6667	49	46	47	60	51	26	74	47	33	56	49
chr3_53908238_53910107	-	49.2222	17.3333	91	39.3333	18	23	11	84	61	128	42	49	27
chr7_17908030_17915413	-	49.2222	57.6667	69	21	42	59	72	67	64	76	15	14	34
chr21_42609440_42629253	+	49.1111	4.66667	129.667	13	0	0	14	134	120	135	20	11	8
chr2_184016236_184025923	+	48.8889	72	48	26.6667	69	69	78	21	37	86	27	24	29
chr3_47466975_47470160	-	48.8889	40.3333	66	40.3333	45	36	40	48	68	82	43	53	25
chr1_108724563_108728576	-	48.7778	60.6667	72.6667	13	63	52	67	97	78	43	19	0	20
chr7_11101418_11151094	+	48.6667	31.3333	71.6667	43	18	19	57	78	37	100	38	27	64
chr12_96717726_96728643	-	48.5556	69.6667	58.6667	17.3333	51	70	88	47	51	78	8	23	21
chr5_80021272_80040434	+	48.4444	66.3333	54.6667	24.3333	59	69	71	35	57	72	17	16	40
chr4_140046318_140060651	-	48.3333	111	32.3333	1.66667	100	121	112	49	14	34	5	0	0
chr12_518534_527802	+	48.2222	81	39	24.6667	76	83	84	31	46	40	17	20	37
chr1_193202123_193205486	+	47.8889	82	26	35.6667	72	107	67	3	56	19	49	33	25
chr10_128768966_128788867	+	47.8889	55.3333	59.6667	28.6667	54	67	45	39	64	76	15	60	11
chr7_35006506_35013217	-	47.8889	83.3333	23.6667	36.6667	97	64	89	31	0	40	28	50	32
chrX_67731691_67742759	+	47.8889	107	18	18.6667	114	89	118	22	4	28	21	15	20
chr15_85223944_85234875	-	47.4444	61.6667	60	20.6667	58	73	54	56	62	62	15	9	38
chr1_29362338_29365938	+	47.3333	22.6667	42.6667	76.6667	28	16	24	49	28	51	72	102	56
chr17_16089868_16097953	-	47.3333	56.6667	60	25.3333	67	56	47	78	58	44	33	4	39
chr1_176050288_176105683	-	47.2222	29.6667	76	36	42	15	32	67	74	87	26	46	36
chr2_143642918_143685310	+	47.2222	141.667	0	0	119	176	130	0	0	0	0	0	0
chr2_24787164_24807429	+	47.2222	26.6667	75.3333	39.6667	24	30	26	74	78	74	22	53	44
chr4_110412483_110416012	+	47.2222	56.6667	77	8	71	53	46	94	42	95	10	0	14
chr4_103635595_103647840	-	47.1111	70.3333	64	7	51	93	67	73	60	59	7	8	6
chr5_619105_624694	+	47.1111	81	20.6667	39.6667	83	94	66	24	21	17	49	35	35
chr12_51402259_51404549	-	47	69.6667	38.3333	33	63	88	58	32	40	43	36	42	21
chr3_136183723_136221621	-	47	44.3333	86.3333	10.3333	23	50	60	129	35	95	10	0	21
chr3_3178944_3182332	+	47	88	22.6667	30.3333	89	95	80	32	15	21	30	31	30
chr9_88211277_88248289	-	47	53.6667	85.6667	1.66667	53	42	66	74	70	113	5	0	0
chr12_49333438_49334971	-	46.8889	36	41	63.6667	39	38	31	61	40	22	71	62	58
chr15_85230856_85234875	-	46.8889	76	38.6667	26	68	70	90	38	13	65	11	20	47
chr19_12825635_12826553	-	46.8889	62	37	41.6667	71	68	47	42	54	15	49	49	27
chr1_53459075_53459374	-	46.7778	88	38	14.3333	72	99	93	30	44	40	11	0	32
chr11_102233627_102239279	+	46.7778	10	77	53.3333	5	18	7	61	60	110	42	79	39
chr2_10281981_10282502	+	46.7778	8.66667	41.3333	90.3333	11	0	15	38	34	52	67	84	120
chr5_39002637_39021238	-	46.7778	120.333	2.66667	17.3333	138	121	102	0	8	0	12	21	19
chr13_28830429_28835595	+	46.6667	54.3333	76	9.66667	74	49	40	87	76	65	12	0	17
chr2_10784446_10808849	-	46.6667	41.3333	81.3333	17.3333	37	49	38	98	69	77	11	27	14
chr5_139819704_139828890	+	46.6667	39.3333	73.6667	27	36	48	34	68	53	100	18	26	37
chr6_170846322_170858201	-	46.6667	38.3333	52.3333	49.3333	44	37	34	55	23	79	44	58	46
chr20_21321359_21327188	+	46.5556	30.3333	62.6667	46.6667	37	30	24	47	81	60	75	39	26
chr5_79974746_80040434	+	46.5556	93.6667	30.3333	15.6667	99	80	102	24	17	50	19	9	19
chr2_240078348_240085619	-	46.4444	20.6667	17	101.667	29	11	22	20	31	0	97	107	101
chr11_77336008_77340944	-	46.3333	60.3333	38	40.6667	97	44	40	52	26	36	46	27	49
chr16_21350242_21363459	+	46.3333	47.3333	59.6667	32	45	62	35	71	66	42	33	16	47
chr4_154191487_154197282	+	46.3333	91	46.3333	1.66667	92	113	68	57	28	54	5	0	0
chr1_21091870_21100103	-	46.2222	68.3333	58.6667	11.6667	60	72	73	30	52	94	9	18	8
chr11_128963516_128994789	-	46.2222	27.6667	99.6667	11.3333	34	14	35	106	56	137	19	15	0
chr14_76633006_76662315	+	46.2222	32.6667	88.3333	17.6667	46	33	19	101	100	64	18	12	23
chr1_180953813_180962561	-	46.1111	59.3333	57.6667	21.3333	54	80	44	46	56	71	15	40	9
chr10_76074425_76158337	+	46.1111	80.3333	19.6667	38.3333	95	78	68	15	5	39	32	59	24
chr11_72598515_72600990	-	46.1111	36	74.3333	28	30	52	26	82	87	54	11	31	42
chr13_30854200_30857928	-	46.1111	26	98.6667	13.6667	39	20	19	61	124	111	15	8	18
chr12_1136914_1137738	+	45.7778	56	60.6667	20.6667	59	59	50	38	70	74	17	9	36
chr2_183993015_183995273	+	45.7778	46	39.6667	51.6667	53	37	48	31	60	28	53	42	60
chr2_58425714_58459247	-	45.7778	49.6667	43	44.6667	45	62	42	0	36	93	46	37	51
chr10_99915850_99923154	+	45.6667	30	75	32	32	43	15	52	112	61	21	45	30
chr12_133083838_133084936	+	45.6667	56.6667	34.3333	46	90	36	44	54	49	0	39	34	65
chr14_39782544_39796226	+	45.6667	100	16	21	91	101	108	0	9	39	18	30	15
chr13_41826781_41835051	-	45.5556	55	59.3333	22.3333	37	47	81	37	49	92	24	21	22
chr2_197777606_197787849	-	45.5556	55	54.6667	27	32	79	54	73	65	26	26	28	27
chr2_24181171_24199945	+	45.5556	23	84	29.6667	16	18	35	77	81	94	32	23	34
chr2_99786013_99787892	-	45.5556	29.6667	85.3333	21.6667	24	31	34	102	49	105	16	0	49
chr4_140058784_140060651	-	45.5556	114.667	22	0	127	85	132	44	22	0	0	0	0
chr17_44248221_44249598	-	45.4444	21.6667	91.3333	23.3333	21	15	29	100	98	76	25	0	45
chr3_143704385_143708679	+	45.4444	73	63.3333	0	94	52	73	20	32	138	0	0	0
chr17_40652725_40653322	+	45.3333	41.3333	55.3333	39.3333	49	46	29	39	43	84	28	38	52
chr17_29483001_29490394	+	45.1111	78	44.3333	13	85	79	70	13	57	63	20	15	4
chr6_83728692_83754378	-	45	53	62.6667	19.3333	57	43	59	74	36	78	26	16	16
chr15_72810408_72853890	+	44.8889	64	32	38.6667	68	51	73	31	65	0	47	10	59
chr16_56419831_56423287	-	44.8889	44	51.3333	39.3333	33	42	57	63	49	42	80	0	38
chr7_618893_751164	-	44.8889	4	90.6667	40	2	0	10	88	76	108	41	25	54
chr8_6582391_6605349	+	44.8889	108	18	8.66667	120	92	112	11	15	28	19	0	7
chr2_53941521_53943880	-	44.7778	71.6667	50.6667	12	69	53	93	58	21	73	23	0	13
chr7_158528194_158531812	-	44.7778	58.3333	45.3333	30.6667	72	58	45	39	39	58	31	31	30
chr16_23632683_23634451	-	44.6667	50.3333	43.6667	40	42	48	61	43	32	56	41	40	39
chr2_53628798_53642744	-	44.6667	134	0	0	164	99	139	0	0	0	0	0	0
chr7_152027686_152055760	-	44.6667	54	53.3333	26.6667	60	55	47	28	89	43	23	16	41
chr7_2054137_2108973	-	44.6667	13.6667	101.667	18.6667	22	16	3	126	107	72	28	8	20
chr7_24663282_24681487	+	44.6667	52.6667	40	41.3333	69	44	45	19	65	36	51	40	33
chr1_95609447_95616975	+	44.5556	100.333	13.6667	19.6667	109	104	88	20	21	0	22	8	29
chr16_21623966_21636436	+	44.5556	60.3333	65.6667	7.66667	49	58	74	67	68	62	15	0	8
chr12_11126254_11199787	-	44.4444	99.3333	12.6667	21.3333	111	97	90	8	30	0	18	18	28
chr7_65751498_65751696	+	44.4444	103	15.3333	15	118	125	66	6	0	40	24	11	10
chr1_213341201_213349835	+	44.3333	94.3333	25.3333	13.3333	75	118	90	22	12	42	13	18	9
chr5_41794105_41807540	-	44.3333	99.3333	14.3333	19.3333	89	103	106	26	17	0	25	21	12
chr6_42571326_42574389	+	44.3333	91.6667	36.6667	4.66667	90	122	63	47	63	0	6	0	8
chr11_119002245_119003929	+	44.2222	6.66667	84	42	8	7	5	59	63	130	43	40	43
chr11_32611093_32617593	+	44.2222	22.6667	46.6667	63.3333	32	12	24	71	28	41	66	48	76
chr3_171965323_171969331	+	44.2222	87	40.3333	5.33333	94	68	99	31	39	51	0	11	5
chr4_148778704_148803083	+	44.2222	59	68.6667	5	61	54	62	76	60	70	10	0	5
chr2_201721405_201721708	-	44.1111	44.3333	32	56	30	43	60	0	63	33	62	63	43
chr10_94291505_94297307	-	44	77.3333	25	29.6667	63	76	93	15	22	38	30	25	34
chr14_35020920_35024118	-	44	71	31	30	75	67	71	31	33	29	24	33	33
chr17_59152281_59161925	+	44	74.3333	44.3333	13.3333	68	81	74	6	53	74	31	0	9
chr3_32745360_32750312	+	44	55	56	21	57	69	39	74	24	70	19	36	8
chr5_107684100_107703654	-	44	61.3333	52	18.6667	75	63	46	63	44	49	24	21	11
chr5_137288317_137290065	-	44	78.6667	39.3333	14	93	79	64	42	29	47	22	0	20
chr3_145838899_145842016	-	43.8889	128.667	0	3	134	138	114	0	0	0	0	9	0
chr13_111870026_111896641	+	43.7778	53	40	38.3333	46	45	68	46	42	32	34	41	40
chr3_47747899_47755980	-	43.7778	34.6667	52.6667	44	39	26	39	48	49	61	36	61	35
chr11_18010144_18029623	-	43.6667	8	68.6667	54.3333	17	7	0	86	62	58	55	52	56
chr15_76580187_76585041	-	43.6667	54	34.3333	42.6667	80	28	54	17	40	46	64	25	39
chr6_74190398_74191967	+	43.6667	40.3333	45	45.6667	46	43	32	54	81	0	74	15	48
chr10_76978821_76979114	+	43.4444	53.6667	29.3333	47.3333	47	62	52	22	44	22	26	52	64
chr2_48701822_48718309	+	43.4444	36	51.3333	43	56	12	40	38	53	63	42	33	54
chr1_41474466_41475926	+	43.3333	83.3333	16.3333	30.3333	82	72	96	30	19	0	25	28	38
chr2_61722590_61726048	-	43.3333	35.6667	58.6667	35.6667	24	41	42	72	45	59	18	51	38
chr20_35236118_35238133	+	43.3333	100	15.6667	14.3333	89	106	105	18	11	18	14	12	17
chr6_137015278_137019820	-	43.3333	83.3333	7.33333	39.3333	110	82	58	0	13	9	46	26	46
chr11_74521229_74528759	+	43.2222	52	54.6667	23	45	53	58	44	44	76	28	18	23
chrX_24839569_24861794	+	43.2222	71	33	25.6667	84	70	59	39	24	36	14	27	36
chr17_60106902_60112969	-	43.1111	58.3333	43.6667	27.3333	55	60	60	75	39	17	25	35	22
chr1_100459093_100464971	+	43	59.3333	19.3333	50.3333	49	56	73	31	27	0	55	34	62
chr1_231079552_231097049	-	43	56.6667	60.6667	11.6667	44	79	47	68	64	50	19	0	16
chr8_48866180_48869991	-	43	56	51.3333	21.6667	45	44	79	79	0	75	23	31	11
chr5_10415600_10417516	+	42.8889	38.6667	63.3333	26.6667	61	22	33	71	64	55	30	32	18
chr9_100756913_100760960	+	42.8889	92.3333	23.3333	13	106	75	96	18	19	33	7	13	19
chr3_33109722_33110462	-	42.7778	96.3333	28	4	80	108	101	26	24	34	12	0	0
chr1_46032241_46032692	+	42.6667	30.6667	20.3333	77	29	30	33	21	35	5	84	81	66
chr18_45391430_45423180	-	42.6667	78.6667	26.3333	23	85	81	70	14	27	38	29	19	21
chr5_108281831_108295048	+	42.6667	100.667	23.6667	3.66667	82	117	103	31	15	25	11	0	0
chr10_69726440_69773943	-	42.5556	106.333	13	8.33333	94	74	151	39	0	0	9	16	0
chr17_58756814_58786686	+	42.5556	55.3333	53.3333	19	47	65	54	60	52	48	25	14	18
chr2_169018297_169023917	-	42.5556	75	34	18.6667	70	80	75	16	42	44	19	27	10
chr5_14330887_14336836	+	42.5556	75.3333	42.3333	10	87	70	69	35	32	60	5	4	21
chr11_12883797_12886447	+	42.4444	102.333	19.6667	5.33333	97	131	79	38	21	0	16	0	0
chr20_34312492_34313077	-	42.4444	28	61	38.3333	27	28	29	73	44	66	29	42	44
chr1_156303338_156304709	-	42.3333	62.3333	23.6667	41	72	50	65	23	31	17	33	47	43
chr1_235643370_235658138	-	42.3333	73.6667	34.3333	19	86	60	75	47	26	30	30	17	10
chr2_113258783_113260758	+	42.3333	40	79	8	38	37	45	49	67	121	7	0	17
chr6_108243001_108250718	-	42.3333	79.3333	39	8.66667	80	100	58	30	46	41	11	0	15
chr7_42187825_42262894	-	42.3333	0	127	0	0	0	0	98	123	160	0	0	0
chr17_59999086_60002460	-	42.2222	51.3333	45.3333	30	51	66	37	21	23	92	24	20	46
chr5_170667932_170669824	+	42.2222	90.3333	29.3333	7	70	107	94	18	24	46	7	14	0
chr9_140728801_140729540	+	42.2222	67.6667	22	37	89	44	70	34	32	0	48	27	36
chr1_51005264_51061888	-	42.1111	35.3333	37.3333	53.6667	45	25	36	23	45	44	48	75	38
chr4_52729603_52744020	+	42.1111	52.6667	26.6667	47	51	62	45	20	33	27	30	50	61
chr1_233353645_233372726	-	42	45.3333	44	36.6667	56	33	47	52	43	37	55	31	24
chr3_67546222_67571058	-	42	70.3333	41.3333	14.3333	93	73	45	40	39	45	6	24	13
chr1_94140170_94140497	-	41.8889	56	60.6667	9	67	37	64	46	59	77	0	14	13
chr11_120343759_120348235	+	41.8889	15.3333	63	47.3333	16	18	12	50	87	52	61	28	53
chr12_19406874_19413955	+	41.8889	78.6667	38.6667	8.33333	82	88	66	31	28	57	15	0	10
chr20_57014001_57016139	+	41.8889	95	24.6667	6	91	83	111	27	36	11	3	7	8
chr3_47777524_47787483	-	41.8889	41.6667	39.6667	44.3333	34	43	48	34	20	65	32	41	60
chr11_68115315_68125315	+	41.7778	13.3333	31.6667	80.3333	11	11	18	62	33	0	112	33	96
chr3_10088264_10091189	+	41.7778	61	32	32.3333	52	72	59	26	35	35	40	28	29
chr7_151960101_151962294	-	41.7778	67	31.6667	26.6667	58	81	62	20	75	0	31	22	27
chr13_113845186_113854830	-	41.6667	66.6667	8.33333	50	90	47	63	17	8	0	83	39	28
chr14_67431908_67525503	+	41.6667	31.6667	82.6667	10.6667	39	29	27	85	74	89	11	10	11
chr5_158621724_158630664	-	41.6667	114.333	5.66667	5	141	108	94	11	6	0	5	10	0
chr1_47761437_47767420	-	41.5556	65.3333	35	24.3333	76	64	56	37	22	46	13	45	15
chr1_8568686_8617582	-	41.5556	43.6667	45.6667	35.3333	47	55	29	40	66	31	31	38	37
chr12_120995085_120995485	+	41.5556	75	35	14.6667	113	40	72	39	38	28	22	7	15
chr3_188208210_188242575	+	41.5556	74.6667	38	12	92	75	57	38	23	53	12	18	6
chr8_37971710_37978667	+	41.5556	21	67	36.6667	18	15	30	74	51	76	31	23	56
chr15_76584772_76588078	-	41.4444	41.6667	31.3333	51.3333	50	36	39	46	17	31	55	40	59
chr17_74763468_74772623	+	41.4444	39.3333	78	7	29	54	35	94	76	64	4	0	17
chr17_79254409_79258695	-	41.4444	15	51	58.3333	14	15	16	41	66	46	119	27	29
chr2_110342703_110350696	-	41.4444	56.3333	48	20	76	60	33	57	39	48	23	8	29
chr2_208841375_208842310	-	41.4444	32.6667	71.3333	20.3333	40	26	32	90	37	87	7	17	37
chr3_98600384_98609300	-	41.4444	1.66667	78.3333	44.3333	0	0	5	69	97	69	62	29	42
chrX_306251_308428	-	41.3333	47.3333	57	19.6667	55	36	51	65	54	52	22	13	24
chrX_44383248_44386611	-	41.3333	75.3333	30.3333	18.3333	68	76	82	34	45	12	14	17	24
chr15_76576098_76585041	-	41.2222	40	36.3333	47.3333	27	43	50	16	72	21	68	38	36
chr16_3900298_3901010	-	41.2222	35	65.6667	23	43	35	27	45	67	85	33	10	26
chr2_242028603_242033847	-	41.2222	70.3333	24.6667	28.6667	69	41	101	14	39	21	35	28	23
chr1_225140372_225195246	+	41.1111	63.3333	13.6667	46.3333	48	55	87	22	0	19	45	60	34
chr1_233482188_233490757	+	41.1111	73.6667	28	21.6667	68	82	71	27	23	34	26	12	27
chr13_52971367_52972329	-	40.8889	0	117.667	5	0	0	0	131	124	98	0	0	15
chr16_4029117_4033441	-	40.8889	79.3333	23.6667	19.6667	59	79	100	30	12	29	19	18	22
chr4_1219148_1222131	-	40.8889	35	53.6667	34	48	29	28	57	46	58	44	25	33
chr6_142487365_142491558	+	40.8889	30	45.6667	47	25	33	32	28	30	79	63	54	24
chr5_138979957_138994551	+	40.7778	43	59	20.3333	61	23	45	71	52	54	11	25	25
chr7_26883649_26894509	-	40.7778	29.6667	61.6667	31	11	36	42	85	54	46	20	26	47
chr9_74817487_74828907	+	40.6667	122	0	0	155	90	121	0	0	0	0	0	0
chr8_42924698_42927450	+	40.5556	33.3333	45.6667	42.6667	24	38	38	70	44	23	37	41	50
chr14_76198681_76201632	+	40.4444	44	54.6667	22.6667	39	50	43	72	42	50	17	15	36
chr4_1231971_1235307	-	40.4444	78.3333	20.6667	22.3333	74	87	74	12	31	19	30	0	37
chr6_101163338_101173579	-	40.4444	73.6667	37.3333	10.3333	85	76	60	51	27	34	7	15	9
chr7_33388680_33427756	+	40.4444	65	48	8.33333	36	78	81	55	23	66	17	0	8
chr1_146757975_146759412	+	40.3333	34.6667	38.6667	47.6667	0	46	58	50	31	35	60	49	34
chr17_62587202_62602758	-	40.3333	10	108.333	2.66667	13	11	6	91	86	148	8	0	0
chr9_134518626_134526336	-	40.3333	59	43	19	70	53	54	39	45	45	23	0	34
chr3_52446827_52448603	+	40.2222	11.3333	84.6667	24.6667	11	15	8	104	70	80	31	22	21
chr1_94685814_94697199	-	40.1111	76.3333	42.3333	1.66667	77	71	81	38	47	42	5	0	0
chr15_100794341_100871259	-	40.1111	0	120.333	0	0	0	0	145	78	138	0	0	0
chr3_32774915_32778982	+	40.1111	89.3333	16.6667	14.3333	55	118	95	19	8	23	22	11	10
chr5_14405957_14420130	+	40.1111	44.6667	20.3333	55.3333	40	56	38	0	44	17	53	50	63
chr12_112371690_112381173	-	40	81.6667	30.3333	8	81	78	86	31	45	15	6	9	9
chr19_18648411_18649246	-	40	42.3333	53.6667	24	42	42	43	51	91	19	30	24	18
chr2_72692289_72707879	-	40	76.3333	31.6667	12	70	60	99	43	25	27	17	11	8
chr13_37614542_37625720	-	39.8889	41	38	40.6667	52	40	31	48	66	0	71	21	30
chr17_49091593_49098726	-	39.8889	30	71	18.6667	29	20	41	73	64	76	7	20	29
chr5_170305101_170308900	+	39.8889	101	12	6.66667	118	97	88	8	0	28	8	12	0
chr12_6859014_6859932	-	39.7778	53.3333	39.6667	26.3333	45	40	75	49	27	43	34	11	34
chr2_32117061_32157204	-	39.7778	42.3333	44	33	55	35	37	43	24	65	24	21	54
chr3_14485132_14489324	+	39.7778	85	23	11.3333	96	69	90	32	37	0	11	0	23
chr9_138741983_138758382	-	39.7778	40	42.3333	37	47	40	33	57	27	43	27	29	55
chr1_35879573_35881315	+	39.6667	76	28	15	98	55	75	18	31	35	21	11	13
chr18_46858234_46906128	-	39.6667	49	46.3333	23.6667	48	30	69	86	17	36	25	11	35
chr2_135010666_135028121	+	39.6667	6.66667	96.3333	16	12	0	8	128	85	76	33	8	7
chr1_227327277_227335260	-	39.5556	59.6667	44	15	41	63	75	27	55	50	17	12	16
chr1_7837220_7838229	+	39.5556	25.6667	41.3333	51.6667	18	47	12	31	33	60	45	41	69
chr16_69269651_69279718	+	39.5556	20.6667	47	51	31	0	31	35	77	29	51	61	41
chr20_54956489_54959380	-	39.5556	52.3333	38	28.3333	52	69	36	41	55	18	14	48	23
chr1_78098800_78107340	-	39.4444	55	28	35.3333	44	58	63	33	26	25	33	47	26
chr12_117402502_117426674	+	39.4444	51.6667	41.6667	25	47	56	52	54	24	47	31	29	15
chr13_60407241_60413582	-	39.4444	33	73.6667	11.6667	30	48	21	98	48	75	13	0	22
chr17_45740455_45745776	+	39.4444	42	34.6667	41.6667	38	52	36	17	30	57	28	67	30
chr4_9642695_9643074	+	39.4444	0	118.333	0	0	0	0	101	141	113	0	0	0
chr7_103828699_103844682	-	39.4444	55.3333	52.3333	10.6667	82	38	46	75	47	35	8	17	7
chr9_36597219_36643080	+	39.4444	27	71.6667	19.6667	35	21	25	52	78	85	21	25	13
chr1_172525009_172526934	+	39.3333	45.3333	50	22.6667	47	50	39	27	38	85	20	18	30
chr14_84112888_84132553	+	39.3333	118	0	0	151	68	135	0	0	0	0	0	0
chr6_149953895_149959696	-	39.3333	41	39	38	31	51	41	25	29	63	45	57	12
chr16_960931_1004666	-	39.2222	16.6667	54	47	34	13	3	58	36	68	86	18	37
chr1_16044388_16047883	+	39.1111	37.6667	64.3333	15.3333	50	21	42	48	62	83	19	10	17
chr1_26584088_26586293	+	39.1111	61.3333	36	20	59	38	87	39	14	55	36	0	24
chr11_68115315_68133170	+	39.1111	17.3333	38.6667	61.3333	19	22	11	31	32	53	69	60	55
chr11_68527037_68529155	-	39.1111	11.6667	74.6667	31	14	16	5	89	84	51	37	31	25
chr4_83799883_83803090	-	39.1111	36.6667	43.6667	37	47	32	31	36	37	58	20	52	39
chr11_66407149_66407594	+	39	84.3333	5	27.6667	91	81	81	15	0	0	30	11	42
chr2_231624674_231658046	+	39	54	48.3333	14.6667	53	40	69	78	30	37	13	17	14
chr4_170501993_170511960	-	39	25.3333	55.6667	36	21	27	28	34	71	62	40	21	47
chr1_201816407_201817722	+	38.8889	45.3333	49	22.3333	50	28	58	52	36	59	28	17	22
chr15_59548483_59564648	-	38.8889	111.667	0	5	105	129	101	0	0	0	0	0	15
chr17_20149239_20163607	+	38.8889	53.3333	46.6667	16.6667	69	49	42	20	52	68	26	0	24
chr17_60061532_60062451	-	38.8889	26.3333	42	48.3333	26	26	27	27	44	55	45	26	74
chr4_85818064_85853516	-	38.8889	78	37.6667	1	72	101	61	52	17	44	3	0	0
chr7_105103068_105108910	-	38.8889	18.6667	61	37	14	17	25	46	54	83	36	48	27
chr9_6814631_6893232	+	38.8889	6.33333	28.6667	81.6667	0	10	9	26	30	30	75	115	55
chr10_4872867_4884696	+	38.7778	0	42.3333	74	0	0	0	95	0	32	45	89	88
chr11_70200407_70208594	+	38.7778	16	47	53.3333	32	16	0	40	27	74	43	58	59
chr12_105321751_105322472	-	38.7778	54.3333	49	13	49	53	61	32	68	47	10	20	9
chr2_239184384_239186596	-	38.7778	41.6667	30	44.6667	31	35	59	19	38	33	28	60	46
chr8_131370263_131414216	-	38.7778	18.3333	98	0	21	18	16	96	104	94	0	0	0
chr1_11133991_11137005	-	38.6667	47.6667	37.6667	30.6667	49	41	53	31	34	48	38	27	27
chr1_167734820_167745403	+	38.6667	37.3333	56	22.6667	42	27	43	73	21	74	18	36	14
chr11_3794862_3797251	-	38.6667	39	41.6667	35.3333	40	42	35	56	40	29	35	40	31
chr13_80094945_80113910	+	38.6667	80	21.6667	14.3333	78	82	80	11	9	45	19	6	18
chr17_4186093_4210418	-	38.6667	47	37.3333	31.6667	43	58	40	39	39	34	19	37	39
chr21_45497574_45500008	+	38.6667	14.6667	52.6667	48.6667	15	18	11	39	90	29	45	51	50
chr3_80680382_80683122	-	38.6667	0	98.6667	17.3333	0	0	0	110	50	136	17	23	12
chr10_103432672_103436193	-	38.5556	14.6667	84.3333	16.6667	20	7	17	37	85	131	13	20	17
chr10_5827815_5842668	-	38.5556	13.6667	44.3333	57.6667	10	11	20	50	45	38	38	74	61
chr10_909683_931700	-	38.5556	49.6667	29.6667	36.3333	55	60	34	20	56	13	57	15	37
chr19_13135835_13136366	+	38.5556	33	64	18.6667	45	23	31	48	62	82	15	35	6
chr2_191765290_191769893	+	38.5556	25.3333	63.3333	27	28	30	18	77	59	54	37	18	26
chr11_72578910_72600990	-	38.4444	47.6667	52.3333	15.3333	40	50	53	43	64	50	25	0	21
chr6_16586011_16658132	-	38.4444	38.3333	51.6667	25.3333	36	34	45	48	62	45	23	18	35
chr1_92798948_92829327	+	38.3333	47.6667	37.3333	30	48	38	57	56	26	30	42	24	24
chr2_224862832_224866639	-	38.3333	31.3333	66.6667	17	44	27	23	55	82	63	26	9	16
chr7_148543589_148544397	-	38.3333	53	41.3333	20.6667	54	53	52	46	38	40	36	16	10
chr1_21327692_21329301	-	38.2222	86.3333	17	11.3333	92	79	88	22	10	19	17	0	17
chr2_191765290_191789319	+	38.2222	21	55	38.6667	21	22	20	56	39	70	47	41	28
chr15_51240217_51250991	+	38.1111	100	2	12.3333	105	99	96	0	6	0	8	12	17
chr19_34922766_34929671	+	38.1111	37	57.3333	20	38	47	26	17	79	76	32	15	13
chr21_36206707_36231875	-	38.1111	18.3333	52.6667	43.3333	12	29	14	48	54	56	35	54	41
chr4_139993020_139994721	-	38.1111	47.3333	48.3333	18.6667	49	60	33	48	41	56	25	5	26
chr7_8043538_8110761	+	38.1111	109.333	5	0	136	80	112	0	15	0	0	0	0
chr8_97318672_97343323	+	38.1111	21.3333	43.3333	49.6667	24	0	40	45	37	48	79	32	38
chr10_93699709_93702325	+	38	67	17	30	49	85	67	35	16	0	22	25	43
chr6_79770195_79770535	-	38	54.3333	27.6667	32	56	66	41	43	40	0	37	36	23
chr18_19144164_19148055	-	37.8889	69.3333	29	15.3333	82	48	78	25	30	32	20	18	8
chr6_86267694_86284096	-	37.8889	31.6667	77	5	26	34	35	42	93	96	9	6	0
chr12_112757029_112757546	-	37.7778	50.3333	42	21	62	41	48	37	29	60	29	26	8
chr2_110321943_110350696	-	37.7778	37.6667	64.3333	11.3333	19	34	60	41	60	92	0	18	16
chr3_195022304_195022903	-	37.7778	54	30.6667	28.6667	51	53	58	33	29	30	15	41	30
chr9_98690361_98718295	+	37.7778	45	52.6667	15.6667	46	32	57	55	55	48	13	16	18
chr9_99711837_99735230	-	37.7778	73	19	21.3333	64	85	70	0	41	16	41	23	0
chr1_67356837_67371058	-	37.6667	37.6667	46	29.3333	49	40	24	55	42	41	22	21	45
chr19_46020921_46021352	+	37.6667	9.33333	68	35.6667	14	5	9	50	56	98	39	49	19
chr8_29959414_29962002	+	37.6667	40	35.3333	37.6667	41	43	36	39	30	37	41	32	40
chr1_1735858_1737977	-	37.5556	54	29.6667	29	54	45	63	10	56	23	24	29	34
chr1_44750507_44804994	-	37.5556	36	40	36.6667	41	44	23	13	53	54	31	41	38
chr5_115202367_115205825	+	37.5556	39	53.3333	20.3333	26	42	49	45	62	53	16	19	26
chr11_1307232_1317024	-	37.4444	3.33333	73	36	10	0	0	84	42	93	49	24	35
chr14_89041037_89044484	+	37.4444	18	77.3333	17	6	23	25	38	82	112	7	22	22
chr17_79027468_79031767	+	37.4444	32	59	21.3333	23	46	27	67	49	61	26	21	17
chr3_52946554_52947633	-	37.4444	44.3333	31.3333	36.6667	37	56	40	26	24	44	35	32	43
chr2_44139571_44145537	-	37.3333	25.3333	50.6667	36	31	15	30	67	33	52	19	34	55
chr6_45399600_45405788	+	37.3333	3.66667	108.333	0	0	0	11	113	83	129	0	0	0
chr12_32751431_32764217	+	37.2222	52	38.3333	21.3333	76	29	51	54	61	0	18	39	7
chr13_50025689_50026045	+	37.2222	24	59.3333	28.3333	31	17	24	32	38	108	31	18	36
chr2_29006773_29011675	+	37.2222	46.6667	42.3333	22.6667	57	33	50	92	35	0	24	8	36
chr4_151509200_151520283	-	37.2222	39.3333	54	18.3333	38	47	33	25	59	78	21	25	9
chr10_1130343_1151207	+	37.1111	19	58	34.3333	37	11	9	37	45	92	37	28	38
chr10_52193236_52350007	-	37.1111	87	17.6667	6.66667	82	82	97	39	7	7	8	0	12
chr17_48818463_48819092	+	37.1111	66.6667	29	15.6667	53	95	52	16	13	58	15	12	20
chr2_85595809_85598685	+	37.1111	13.3333	77.6667	20.3333	15	11	14	61	86	86	20	15	26
chr3_4403723_4418073	-	37.1111	97.6667	13.6667	0	130	85	78	17	5	19	0	0	0
chr5_140961879_140963182	-	37.1111	14	75	22.3333	21	5	16	66	76	83	29	21	17
chr5_145197457_145205763	-	37.1111	0	85.3333	26	0	0	0	76	93	87	15	52	11
chr6_2116005_2124965	-	37.1111	29.3333	21.6667	60.3333	35	35	18	6	25	34	54	65	62
chr7_98988516_98988876	+	37.1111	6	76.6667	28.6667	8	0	10	121	59	50	46	19	21
chr9_74825603_74834422	+	37.1111	110.333	0	1	117	110	104	0	0	0	3	0	0
chr17_8473038_8480656	-	37	77.3333	17.3333	16.3333	71	96	65	16	14	22	14	18	17
chr16_31102096_31102663	-	36.8889	46.3333	31.6667	32.6667	44	34	61	12	23	60	25	50	23
chr19_49136701_49136912	-	36.8889	20.6667	90	0	22	19	21	87	98	85	0	0	0
chr21_32537279_32575328	-	36.8889	22.3333	82	6.33333	17	23	27	61	60	125	7	12	0
chr14_76633006_76647192	+	36.7778	47	45	18.3333	48	55	38	41	53	41	25	14	16
chr12_8866407_8866637	+	36.6667	81.6667	27.6667	0.666667	73	93	79	15	19	49	2	0	0
chr15_89656956_89698765	+	36.6667	8.33333	53.3333	48.3333	7	6	12	70	66	24	66	30	49
chr21_32554738_32575328	-	36.6667	26	73	11	29	23	26	63	87	69	19	14	0
chr7_104800954_104809712	-	36.6667	31.6667	72	6.33333	35	36	24	71	51	94	11	0	8
chr14_73614503_73614814	+	36.5556	27.6667	62	20	37	9	37	29	77	80	15	16	29
chr20_17937577_17941969	-	36.5556	40.3333	25.6667	43.6667	49	36	36	16	31	30	39	46	46
chr3_128514203_128526514	+	36.5556	33.3333	51	25.3333	33	51	16	59	62	32	23	20	33
chr1_59805630_59812070	+	36.4444	46.3333	12.3333	50.6667	48	46	45	7	0	30	48	35	69
chr13_45725822_45781640	+	36.4444	43	58.3333	8	46	45	38	62	41	72	5	9	10
chr15_35207239_35219339	-	36.4444	67.6667	11	30.6667	72	57	74	23	10	0	36	37	19
chr3_155639976_155643155	+	36.4444	50.6667	29.3333	29.3333	36	38	78	28	24	36	33	32	23
chr3_43591212_43607219	-	36.4444	47.6667	59.3333	2.33333	41	53	49	47	36	95	7	0	0
chr11_71693807_71701763	+	36.3333	56.6667	26.6667	25.6667	63	40	67	34	28	18	32	36	9
chr2_15629018_15651474	-	36.3333	36	70.3333	2.66667	34	46	28	38	87	86	8	0	0
chr1_225273412_225284941	+	36.2222	52.3333	1.33333	55	53	50	54	4	0	0	39	67	59
chr12_109212025_109217137	-	36.2222	49.6667	51	8	51	54	44	51	52	50	10	0	14
chr16_19234367_19236160	+	36.2222	108.667	0	0	138	76	112	0	0	0	0	0	0
chr2_136360070_136362586	+	36.2222	20	55	33.6667	20	28	12	55	31	79	28	40	33
chr2_184043535_184047408	+	36.2222	37	30.3333	41.3333	26	36	49	9	38	44	61	26	37
chr20_33065577_33067594	+	36.2222	47	39.3333	22.3333	51	36	54	28	53	37	20	29	18
chr7_42187825_42212285	-	36.2222	12.6667	96	0	10	19	9	106	88	94	0	0	0
chr9_138741983_138774924	-	36.2222	10.6667	72.3333	25.6667	10	9	13	35	85	97	37	28	12
chr1_43239234_43241150	+	36.1111	59.3333	38.3333	10.6667	41	75	62	18	54	43	14	0	18
chr22_47022648_47033857	+	36.1111	29.3333	56	23	37	19	32	40	54	74	12	44	13
chr11_128910823_128936763	-	36	6.66667	70	31.3333	7	7	6	60	69	81	57	0	37
chr15_65266940_65275931	-	36	42.3333	30.3333	35.3333	42	36	49	34	30	27	42	37	27
chr2_162036125_162061304	+	36	43.3333	47.3333	17.3333	39	38	53	50	44	48	14	32	6
chr15_78337242_78346529	-	35.8889	64.3333	35	8.33333	69	58	66	27	49	29	12	0	13
chr19_1147308_1154401	-	35.8889	81	18.6667	8	87	98	58	13	15	28	16	0	8
chr2_61715300_61717911	-	35.8889	35.6667	45.6667	26.3333	38	28	41	58	44	35	38	17	24
chr1_214637973_214638300	-	35.7778	36.3333	62.6667	8.33333	49	32	28	44	54	90	14	0	11
chr14_99723808_99724176	-	35.7778	10	2	95.3333	17	0	13	0	6	0	108	98	80
chr7_33407379_33427756	+	35.7778	38.3333	50.3333	18.6667	39	48	28	27	37	87	22	13	21
chr8_118540890_118543066	+	35.7778	44.3333	46	17	54	42	37	17	17	104	18	18	15
chr1_48821342_48825442	-	35.6667	15.3333	6	85.6667	17	13	16	18	0	0	113	83	61
chr11_61096835_61097546	-	35.6667	61	17	29	66	57	60	14	13	24	50	16	21
chr15_43164809_43170882	-	35.6667	55.3333	27	24.6667	53	43	70	28	30	23	20	33	21
chr17_66110563_66121621	+	35.6667	14.6667	83	9.33333	13	22	9	41	115	93	7	0	21
chr7_102039995_102047945	+	35.6667	46.6667	49.3333	11	41	58	41	40	69	39	7	11	15
chr3_119219542_119232566	+	35.4444	38.6667	41.6667	26	52	35	29	47	27	51	11	44	23
chr3_141087463_141105779	+	35.4444	25.6667	54.6667	26	23	34	20	39	46	79	22	14	42
chrX_46510545_46513140	-	35.4444	53	15.6667	37.6667	44	54	61	19	16	12	45	20	48
chr10_126176991_126186697	+	35.3333	79	1.33333	25.6667	98	73	66	0	4	0	13	44	20
chr2_26587170_26598016	+	35.3333	51.6667	45.6667	8.66667	48	48	59	40	45	52	10	0	16
chr22_30032740_30035201	+	35.3333	48	46	12	60	40	44	35	47	56	21	0	15
chr10_5751493_5756170	+	35.2222	47	46.6667	12	51	28	62	49	43	48	18	0	18
chr15_44046022_44048964	+	35.2222	55	32.3333	18.3333	51	65	49	41	28	28	30	14	11
chr20_47682729_47683047	+	35.1111	5	62	38.3333	0	6	9	42	49	95	42	27	46
chr22_41738533_41739580	+	35.1111	27.6667	60.3333	17.3333	28	24	31	39	56	86	28	15	9
chr3_60751257_60752831	-	35.1111	0	105.333	0	0	0	0	94	88	134	0	0	0
chr6_158317859_158331057	+	35.1111	6.66667	74	24.6667	10	0	10	51	101	70	28	24	22
chr7_63796637_63797360	+	35.1111	43	31.3333	31	65	43	21	61	25	8	37	23	33
chr1_32502511_32504220	+	35	38.3333	41.3333	25.3333	41	31	43	71	39	14	12	43	21
chr10_7839010_7844817	+	35	28	39	38	32	27	25	49	26	42	39	28	47
chr3_48019355_48040369	-	35	49.6667	33.6667	21.6667	37	57	55	0	35	66	14	32	19
chr9_98740343_98742148	+	35	52.3333	32.3333	20.3333	60	46	51	17	38	42	13	22	26
chr1_197621365_197684204	-	34.8889	69	24.3333	11.3333	71	78	58	23	44	6	10	9	15
chr4_106367540_106377902	-	34.8889	51	22.3333	31.3333	71	48	34	36	9	22	21	48	25
chr5_74130251_74137504	-	34.8889	21	43.3333	40.3333	21	23	19	25	39	66	30	51	40
chr9_115336337_115337531	+	34.8889	44.6667	50.6667	9.33333	53	35	46	53	22	77	8	15	5
chr12_105385490_105389804	+	34.7778	23.6667	43.3333	37.3333	14	38	19	44	50	36	45	40	27
chr14_50616726_50616948	-	34.7778	63	20.3333	21	40	95	54	25	36	0	15	42	6
chr15_64410316_64415745	+	34.7778	47.6667	27.3333	29.3333	42	46	55	32	27	23	40	24	24
chr5_137904614_137906830	-	34.7778	51.3333	37	16	57	56	41	27	53	31	18	0	30
chr8_54682178_54684727	-	34.7778	48.3333	44.3333	11.6667	49	50	46	48	64	21	13	22	0
chrX_53674311_53681075	-	34.7778	52.6667	18	33.6667	48	71	39	0	25	29	29	53	19
chr11_47837031_47841010	-	34.6667	26.3333	36.6667	41	20	30	29	27	28	55	31	48	44
chr17_58342773_58348842	-	34.6667	45.6667	48.3333	10	52	50	35	36	38	71	5	25	0
chr20_21319682_21324846	+	34.6667	33.6667	46.6667	23.6667	46	29	26	42	50	48	20	23	28
chr10_116247717_116251637	-	34.5556	30.6667	73	0	34	33	25	72	62	85	0	0	0
chr19_11258494_11258789	-	34.5556	2	55.3333	46.3333	6	0	0	69	38	59	31	45	63
chr19_18258253_18258434	+	34.5556	17	36	50.6667	28	23	0	35	50	23	54	52	46
chr5_137342679_137356886	-	34.5556	52.3333	34	17.3333	55	54	48	46	43	13	9	29	14
chr9_22046750_22064017	+	34.5556	42.3333	46.3333	15	66	23	38	54	51	34	8	23	14
chr1_8555123_8601377	-	34.4444	46	34	23.3333	70	39	29	33	30	39	28	29	13
chr20_25612794_25615463	+	34.4444	24.3333	44	35	25	22	26	56	36	40	48	25	32
chr5_138994171_138994551	+	34.4444	54.6667	37	11.6667	53	52	59	45	32	34	14	6	15
chr5_14270934_14287172	+	34.4444	41.6667	46.6667	15	30	51	44	49	47	44	11	23	11
chr9_126519982_126641300	-	34.4444	58.3333	19	26	48	57	70	12	26	19	15	50	13
chr11_78176922_78189729	-	34.3333	39.6667	46.6667	16.6667	24	30	65	44	45	51	39	0	11
chr13_21305980_21306260	-	34.3333	50	41	12	25	58	67	62	48	13	11	12	13
chr14_103865288_103894777	+	34.3333	66	32.3333	4.66667	50	89	59	24	47	26	0	9	5
chr18_8076453_8088849	+	34.3333	103	0	0	107	124	78	0	0	0	0	0	0
chr2_172193963_172196064	-	34.3333	37.6667	37	28.3333	18	28	67	63	48	0	0	35	50
chr7_138951079_138957186	+	34.3333	40.3333	38.6667	24	56	36	29	54	39	23	25	14	33
chr1_214564331_214571344	-	34.2222	24.3333	78.3333	0	27	27	19	70	75	90	0	0	0
chr20_25612794_25626284	+	34.2222	26	58.3333	18.3333	25	20	33	110	38	27	17	26	12
chr5_58284320_58289292	-	34.2222	7.33333	91.6667	3.66667	16	0	6	88	86	101	11	0	0
chr6_107824861_107827631	+	34.2222	71.3333	0	31.3333	68	68	78	0	0	0	13	33	48
chr9_86294690_86301070	-	34.2222	47.6667	40	15	41	52	50	21	29	70	21	0	24
chr11_73418465_73429763	-	34.1111	45.6667	38	18.6667	44	50	43	32	32	50	25	19	12
chr13_96375496_96377506	+	34.1111	51	30.6667	20.6667	54	63	36	13	16	63	23	17	22
chr18_21644104_21663045	+	34.1111	37.6667	50	14.6667	36	34	43	38	67	45	8	0	36
chr3_136162129_136196254	-	34.1111	46	46.3333	10	53	48	37	54	71	14	5	25	0
chr6_84055892_84117620	-	34.1111	28.3333	48	26	25	25	35	28	37	79	34	29	15
chr7_155295716_155301792	-	34.1111	0	39.3333	63	0	0	0	21	43	54	59	64	66
chr7_2269619_2270399	-	34.1111	32.3333	52.3333	17.6667	29	25	43	62	38	57	25	9	19
chr7_33185854_33195314	+	34.1111	32.3333	42.3333	27.6667	36	31	30	23	60	44	36	18	29
chr13_100953714_100962162	+	34	64.3333	23.6667	14	92	56	45	27	44	0	13	0	29
chr16_11873022_11876244	-	34	52.6667	27.6667	21.6667	40	70	48	42	15	26	24	9	32
chr20_35832288_35842268	+	34	17	58.6667	26.3333	11	14	26	62	69	45	31	32	16
chr5_76745585_76785397	-	34	64	29	9	85	44	63	18	35	34	15	0	12
chr6_17669524_17675264	-	34	37	44	21	47	24	40	24	53	55	21	20	22
chr9_111812563_111812972	-	34	12	51.6667	38.3333	12	17	7	62	30	63	22	52	41
chr9_79852918_79853302	+	34	44.3333	3.66667	54	63	19	51	11	0	0	55	60	47
chr12_27148170_27156323	-	33.8889	30.3333	41.3333	30	22	41	28	27	63	34	29	29	32
chr6_117010483_117026323	+	33.8889	62.3333	14.6667	24.6667	75	33	79	13	9	22	30	33	11
chr3_50289532_50290616	+	33.7778	27.3333	47.6667	26.3333	36	26	20	58	53	32	50	19	10
chr6_17665470_17669777	-	33.7778	60	29	12.3333	57	74	49	30	40	17	19	0	18
chr2_44139571_44153100	-	33.6667	17	36.6667	47.3333	20	22	9	42	37	31	43	35	64
chr10_70723047_70726959	+	33.5556	30.6667	30.3333	39.6667	26	31	35	34	26	31	35	16	68
chr10_909683_910210	-	33.5556	35.3333	23	42.3333	10	68	28	37	32	0	33	52	42
chr18_19202686_19203900	+	33.5556	33.3333	41.6667	25.6667	34	46	20	5	50	70	37	16	24
chr3_12558110_12560696	+	33.5556	81.3333	6.33333	13	95	76	73	0	19	0	17	7	15
chr7_24663282_24690331	+	33.5556	34	38	28.6667	18	47	37	41	41	32	18	32	36
chr1_231506308_231509845	-	33.4444	66.6667	31.3333	2.33333	57	73	70	22	51	21	7	0	0
chr17_64092369_64128881	-	33.4444	16.6667	81.6667	2	19	3	28	50	47	148	6	0	0
chr2_72945232_72958374	-	33.4444	83	10.3333	7	93	73	83	10	21	0	7	9	5
chr20_33632308_33645374	-	33.4444	14.6667	62	23.6667	10	14	20	61	70	55	27	18	26
chr7_102398301_102401858	+	33.4444	52	23.6667	24.6667	54	36	66	0	28	43	26	23	25
chr17_77642782_77647218	-	33.3333	100	0	0	134	86	80	0	0	0	0	0	0
chr5_138979957_139003046	+	33.3333	33	56.3333	10.6667	32	30	37	26	34	109	21	0	11
chr6_101246589_101253756	-	33.3333	45.3333	34.6667	20	37	46	53	50	26	28	7	44	9
chr3_56694759_56707753	-	33.2222	40.3333	56.6667	2.66667	49	44	28	62	37	71	8	0	0
chr13_25051839_25052414	-	33.1111	14.6667	79.6667	5	17	15	12	125	39	75	4	0	11
chr21_34799191_34805178	+	33.1111	31.6667	48	19.6667	37	20	38	41	48	55	26	8	25
chr4_39900009_39904080	-	33.1111	14.3333	35.6667	49.3333	9	9	25	36	27	44	63	39	46
chr7_156516806_156549159	-	33.1111	34	48.6667	16.6667	38	38	26	46	39	61	14	22	14
chr9_22046750_22097363	+	33.1111	43	43.6667	12.6667	37	41	51	35	53	43	7	0	31
chr10_69748420_69773943	-	33	54.6667	29	15.3333	72	56	36	39	9	39	19	19	8
chr2_170460152_170471234	+	33	34.6667	45.6667	18.6667	40	35	29	52	57	28	13	37	6
chr8_129001408_129022690	+	33	25	72.3333	1.66667	27	11	37	86	67	64	5	0	0
chr18_8113484_8143777	+	32.8889	98.6667	0	0	109	78	109	0	0	0	0	0	0
chr20_21195173_21196286	+	32.8889	15.6667	48.6667	34.3333	24	0	23	31	38	77	20	51	32
chr3_130649260_130660543	+	32.8889	41.3333	35.6667	21.6667	27	41	56	53	26	28	32	10	23
chr3_56703728_56707753	-	32.8889	26.3333	57.3333	15	36	20	23	33	49	90	20	17	8
chr8_61496767_61504528	+	32.8889	52.3333	34	12.3333	54	65	38	23	38	41	9	0	28
chr1_95609447_95639445	+	32.7778	63.6667	15	19.6667	69	51	71	0	31	14	4	23	32
chr13_52992127_53001354	-	32.7778	11.3333	52.6667	34.3333	11	13	10	74	39	45	26	34	43
chr17_62557618_62568074	-	32.7778	6.33333	89	3	6	6	7	82	90	95	0	0	9
chr17_79532531_79539114	-	32.7778	17.3333	66	15	19	13	20	65	19	114	12	26	7
chr19_46357433_46357765	-	32.7778	20.3333	39.6667	38.3333	12	12	37	37	31	51	33	38	44
chr10_103427643_103436193	-	32.6667	24.6667	41.3333	32	27	29	18	16	16	92	20	18	58
chr14_50941795_50971575	-	32.6667	92	2	4	77	95	104	0	6	0	0	0	12
chr1_12359259_12368698	+	32.5556	16.6667	60.3333	20.6667	11	20	19	94	42	45	24	25	13
chr1_8555123_8674745	-	32.5556	38	38.3333	21.3333	39	60	15	31	50	34	23	26	15
chr4_108603171_108615162	-	32.5556	19.6667	69.6667	8.33333	24	27	8	59	62	88	7	18	0
chr7_157013383_157024021	+	32.5556	46.3333	36	15.3333	49	35	55	32	46	30	18	22	6
chr1_113196220_113202401	+	32.4444	30	32	35.3333	30	32	28	41	23	32	37	36	33
chr15_94841430_94841959	+	32.4444	78.3333	10.6667	8.33333	84	70	81	0	14	18	18	0	7
chr17_37864574_37866734	+	32.4444	32.3333	52.6667	12.3333	26	33	38	49	37	72	5	16	16
chr2_120885264_120932580	+	32.4444	55.3333	18	24	49	54	63	11	32	11	18	37	17
chr20_33954360_33981999	-	32.4444	29.6667	44.3333	23.3333	42	29	18	50	36	47	32	19	19
chr1_233353645_233363117	-	32.3333	38	41	18	56	37	21	30	36	57	17	15	22
chr16_18809247_18810156	-	32.3333	62.3333	24.3333	10.3333	81	52	54	21	10	42	21	10	0
chr3_5215702_5216099	+	32.3333	67	19.6667	10.3333	76	35	90	25	7	27	16	15	0
chr1_741179_745550	-	32.2222	10	51	35.6667	0	0	30	32	47	74	43	33	31
chr13_24796957_24798720	+	32.2222	1.66667	78.3333	16.6667	5	0	0	63	79	93	14	16	20
chr19_11623871_11625036	-	32.2222	42.3333	26.3333	28	40	50	37	0	35	44	32	12	40
chr2_32713655_32718734	+	32.2222	30.3333	43.6667	22.6667	37	31	23	60	35	36	14	29	25
chr3_195686054_195686957	-	32.1111	0	84	12.3333	0	0	0	86	64	102	37	0	0
chr5_151169884_151175136	+	32.1111	6.66667	77	12.6667	14	0	6	44	66	121	10	16	12
chr13_46090278_46099186	+	32	12	70	14	14	6	16	67	43	100	32	0	10
chr16_71712658_71715808	-	32	50	18.6667	27.3333	52	52	46	7	18	31	23	26	33
chr2_26596235_26598016	+	32	30	23.3333	42.6667	25	42	23	13	16	41	14	70	44
chr20_33077071_33080402	+	32	25.6667	58.3333	12	28	23	26	34	51	90	24	0	12
chr6_20781376_20846409	+	32	0	25	71	0	0	0	19	32	24	81	60	72
chr3_149619859_149639014	+	31.8889	33.3333	46	16.3333	36	26	38	36	35	67	17	24	8
chr1_219366424_219392054	+	31.7778	55	34.3333	6	70	38	57	20	43	40	9	9	0
chr15_49517402_49584734	+	31.7778	42.6667	20	32.6667	48	33	47	10	39	11	22	22	54
chr7_131113792_131130662	+	31.7778	28	47.6667	19.6667	35	33	16	39	76	28	11	14	34
chr8_142170731_142173528	+	31.7778	33	61	1.33333	21	23	55	48	41	94	4	0	0
chrX_53672263_53707139	-	31.7778	44.3333	41.6667	9.33333	47	55	31	34	43	48	13	0	15
chr1_176132005_176145143	-	31.6667	57.6667	16	21.3333	50	65	58	37	11	0	9	15	40
chr12_39223181_39268313	-	31.6667	95	0	0	107	97	81	0	0	0	0	0	0
chr19_40761065_40771258	-	31.6667	51.6667	13.6667	29.6667	73	41	41	0	17	24	39	18	32
chr4_79747191_79772210	+	31.6667	47.6667	23.3333	24	58	40	45	46	10	14	36	19	17
chr1_155691308_155695810	+	31.5556	51.3333	9.66667	33.6667	54	62	38	0	29	0	14	54	33
chr1_197611841_197627499	-	31.5556	65.3333	16	13.3333	93	50	53	0	27	21	40	0	0
chr13_20425495_20426330	-	31.5556	21	56	17.6667	18	19	26	45	35	88	11	18	24
chr16_23113640_23119504	-	31.5556	19	43	32.6667	10	23	24	24	42	63	39	15	44
chr20_50290692_50307358	-	31.5556	23	69	2.66667	23	18	28	26	105	76	8	0	0
chr7_129760589_129762042	+	31.5556	33.3333	31.3333	30	35	29	36	0	56	38	25	33	32
chr7_27668986_27672060	-	31.5556	94.6667	0	0	0	132	152	0	0	0	0	0	0
chr7_72193790_72209578	-	31.5556	21.3333	59.6667	13.6667	25	16	23	31	69	79	4	21	16
chr14_75576388_75577074	-	31.4444	41.6667	32	20.6667	34	56	35	18	32	46	6	38	18
chr15_92459223_92459688	+	31.4444	73.6667	13.6667	7	86	77	58	13	28	0	7	0	14
chr17_64728806_64738878	+	31.4444	23.3333	39.6667	31.3333	19	8	43	33	24	62	22	40	32
chr17_6498292_6503778	-	31.4444	24.3333	62.3333	7.66667	12	32	29	58	40	89	23	0	0
chr15_38591574_38617010	+	31.3333	18.3333	60.6667	15	29	16	10	55	82	45	21	24	0
chr22_28692186_28702631	-	31.3333	94	0	0	133	76	73	0	0	0	0	0	0
chr3_124560230_124592378	-	31.3333	33.6667	60.3333	0	38	36	27	46	59	76	0	0	0
chr6_158288579_158296208	+	31.3333	19.3333	60	14.6667	20	21	17	18	67	95	15	16	13
chr10_530721_532470	-	31.2222	91.3333	0	2.33333	80	91	103	0	0	0	7	0	0
chr14_97312432_97327072	+	31.2222	46	28	19.6667	33	38	67	54	24	6	16	13	30
chr2_144966170_144969146	-	31.2222	29.3333	34.6667	29.6667	17	32	39	46	16	42	15	24	50
chr4_128590191_128609022	+	31.2222	60	11	22.6667	56	64	60	27	6	0	29	19	20
chr6_145992375_146007432	-	31.2222	59.3333	17	17.3333	48	65	65	37	14	0	20	19	13
chr10_65140078_65214849	-	31.1111	69.6667	12.6667	11	70	56	83	12	9	17	7	23	3
chr10_70545893_70546449	+	31.1111	41.3333	9.33333	42.6667	37	30	57	8	4	16	41	34	53
chr14_39623415_39627606	-	31.1111	51	23.6667	18.6667	34	53	66	29	0	42	34	12	10
chr19_39408364_39409453	-	31.1111	25.3333	23.3333	44.6667	25	23	28	23	8	39	67	25	42
chr2_48555700_48573890	+	31.1111	7.33333	39	47	7	11	4	15	54	48	39	56	46
chr2_72786582_72802797	-	31.1111	77.6667	9.66667	6	67	91	75	0	29	0	5	0	13
chr7_100454490_100454798	+	31.1111	23.3333	49.6667	20.3333	28	25	17	44	64	41	35	12	14
chr1_230798887_230810870	+	31	40.6667	33.6667	18.6667	35	37	50	34	41	26	16	20	20
chr14_23395342_23396869	-	31	53.6667	25.6667	13.6667	45	78	38	39	38	0	26	4	11
chr14_73614503_73640415	+	31	29	53	11	28	22	37	76	46	37	0	21	12
chr2_211018219_211019335	-	31	25.6667	56	11.3333	19	25	33	28	53	87	6	16	12
chr3_185638892_185639914	-	31	33	45	15	41	28	30	48	29	58	10	19	16
chr3_197009550_197009716	-	31	2.33333	59.3333	31.3333	3	0	4	102	25	51	28	22	44
chr4_76711303_76711950	+	31	21.3333	44.3333	27.3333	30	16	18	38	25	70	30	26	26
chr6_76412361_76412788	+	31	30.3333	40	22.6667	16	30	45	19	55	46	26	32	10
chr1_165648679_165652347	-	30.8889	67.3333	25.3333	0	80	50	72	35	27	14	0	0	0
chr1_41474466_41475261	+	30.8889	67	0	25.6667	65	70	66	0	0	0	26	23	28
chr11_34991686_35006275	+	30.8889	46.6667	25.6667	20.3333	59	32	49	19	13	45	12	28	21
chr15_44907561_44912601	-	30.8889	33	33	26.6667	30	32	37	43	0	56	16	43	21
chr2_63711738_63720074	-	30.8889	29.3333	44.6667	18.6667	29	9	50	35	41	58	24	20	12
chr1_70758071_70781249	-	30.7778	59	25.6667	7.66667	46	60	71	30	10	37	17	0	6
chr13_80080303_80095110	+	30.7778	28.3333	25	39	13	51	21	26	40	9	39	49	29
chr14_105814830_105821514	+	30.7778	51.3333	24.3333	16.6667	59	68	27	21	31	21	23	14	13
chr22_30374431_30387659	+	30.7778	79.6667	7	5.66667	84	76	79	16	5	0	17	0	0
chr3_33109722_33114205	-	30.7778	39.3333	28.6667	24.3333	49	27	42	16	38	32	22	35	16
chr4_2492064_2502465	+	30.7778	18	37.3333	37	18	15	21	48	20	44	33	48	30
chr7_6452442_6456552	-	30.7778	30.3333	43.6667	18.3333	41	28	22	44	55	32	20	8	27
chr9_140705913_140712590	+	30.7778	62	13.6667	16.6667	64	74	48	12	29	0	19	12	19
chrX_135095117_135098917	+	30.7778	58	21	13.3333	51	46	77	11	22	30	16	16	8
chrX_44870206_44896934	+	30.7778	61.3333	24	7	83	47	54	0	41	31	13	0	8
chr1_46290105_46295253	+	30.6667	17	68.3333	6.66667	21	13	17	46	107	52	10	0	10
chr17_29483001_29509683	+	30.6667	44.6667	40.3333	7	46	40	48	30	19	72	16	0	5
chr22_47370186_47393605	+	30.6667	33.3333	40	18.6667	45	29	26	39	81	0	20	14	22
chr4_36212012_36216102	-	30.6667	65.6667	14.6667	11.6667	65	48	84	24	20	0	14	9	12
chr5_127782174_127866386	-	30.6667	92	0	0	91	110	75	0	0	0	0	0	0
chr5_132219032_132220811	-	30.6667	47.6667	29.6667	14.6667	45	60	38	26	28	35	23	21	0
chr8_90600120_90608741	-	30.6667	73.3333	4.66667	14	67	98	55	7	0	7	18	0	24
chr9_138741983_138754454	-	30.6667	44.3333	32.6667	15	38	37	58	25	45	28	21	22	2
chr12_47497896_47501947	+	30.5556	35.3333	0	56.3333	24	49	33	0	0	0	31	49	89
chr13_76195899_76301234	+	30.5556	12.3333	16.3333	63	11	9	17	12	5	32	52	87	50
chr17_79571574_79575848	-	30.5556	30	37.6667	24	34	33	23	28	44	41	37	11	24
chr19_30476130_30477324	+	30.5556	18.6667	28.3333	44.6667	22	7	27	4	44	37	52	45	37
chr2_37329066_37331275	-	30.5556	27.3333	52.6667	11.6667	36	18	28	48	57	53	18	0	17
chr3_120469370_120469847	+	30.5556	27.3333	28.6667	35.6667	26	34	22	0	25	61	20	51	36
chr9_14639894_14680160	-	30.5556	0	61.6667	30	0	0	0	17	55	113	19	27	44
chr1_236969444_236979843	+	30.4444	29.3333	49.6667	12.3333	46	20	22	50	57	42	16	0	21
chr1_94360170_94363454	-	30.4444	57.6667	30.6667	3	56	60	57	24	35	33	9	0	0
chr15_62325640_62336454	-	30.4444	48.6667	33.6667	9	62	38	46	25	53	23	5	22	0
chr2_120684174_120692534	+	30.4444	31.6667	38.6667	21	25	39	31	59	31	26	24	28	11
chr2_227771509_227779067	+	30.4444	0	23	68.3333	0	0	0	10	39	20	76	43	86
chr2_99811214_99812219	+	30.4444	71.3333	8	12	76	85	53	4	20	0	13	14	9
chr21_48063447_48064400	+	30.4444	34.3333	46	11	32	39	32	58	61	19	14	19	0
chr3_51575605_51624575	+	30.4444	18.3333	27.3333	45.6667	10	36	9	19	39	24	44	55	38
chr1_225195115_225284941	+	30.3333	71.3333	0	19.6667	48	88	78	0	0	0	24	11	24
chr15_50757244_50763992	+	30.3333	42	29.6667	19.3333	38	58	30	11	55	23	30	0	28
chr19_11223954_11224438	+	30.3333	17	41.6667	32.3333	11	12	28	45	35	45	29	41	27
chr5_65307877_65310553	+	30.3333	62	11	18	73	63	50	20	6	7	7	22	25
chr12_49854553_49884514	+	30.2222	49.6667	17.3333	23.6667	54	45	50	12	14	26	15	33	23
chr9_20923659_20933102	+	30.2222	38.6667	37.6667	14.3333	36	36	44	29	19	65	26	12	5
chr10_12442015_12445368	+	30.1111	90.3333	0	0	80	116	75	0	0	0	0	0	0
chr14_21825356_21829372	-	30.1111	19	42.3333	29	17	20	20	13	18	96	27	27	33
chr3_11399892_11406208	+	30.1111	47.6667	30.6667	12	48	54	41	30	22	40	8	14	14
chr7_30363258_30363918	+	30.1111	47.3333	43	0	43	48	51	46	26	57	0	0	0
chrX_299339_308428	-	30.1111	22.6667	42.3333	25.3333	28	23	17	13	30	84	17	38	21
chr1_246599247_246603426	-	30	33	27	30	58	28	13	20	35	26	24	31	35
chr1_6007164_6022009	-	30	44	39.3333	6.66667	48	34	50	21	34	63	13	0	7
chr12_27521195_27533337	+	30	40	21.6667	28.3333	46	28	46	23	19	23	40	23	22
chr3_138407717_138413749	-	30	40	29	21	49	45	26	30	19	38	11	40	12
chr4_25128886_25160729	-	30	32.3333	32.3333	25.3333	32	29	36	7	31	59	20	32	24
chr6_111208708_111210186	+	30	49	28.3333	12.6667	70	46	31	36	25	24	16	0	22
chr1_231081135_231097049	-	29.8889	51.6667	29.3333	8.66667	56	46	53	26	45	17	20	0	6
chr1_78183552_78191447	-	29.8889	56.3333	33.3333	0	62	50	57	32	42	26	0	0	0
chr10_15875629_15889942	-	29.8889	85.6667	2.66667	1.33333	57	116	84	0	0	8	0	0	4
chr12_109210814_109217137	-	29.8889	45.6667	37	7	51	39	47	31	47	33	7	0	14
chr12_69210592_69218431	+	29.8889	43.6667	31	15	54	29	48	30	44	19	21	0	24
chr17_80417868_80430574	+	29.8889	31	40	18.6667	29	29	35	41	27	52	11	30	15
chr2_158655939_158675071	-	29.8889	30.6667	48	11	36	34	22	46	55	43	14	13	6
chr22_46096162_46125470	+	29.8889	65	18	6.66667	86	59	50	8	15	31	20	0	0
chr9_96233423_96259881	+	29.8889	35	29	25.6667	31	32	42	7	34	46	33	18	26
chr1_78324623_78332076	+	29.7778	74	14	1.33333	91	63	68	0	5	37	4	0	0
chr17_7849046_7849304	+	29.7778	18	47.3333	24	16	21	17	40	36	66	15	19	38
chr3_149563798_149613347	+	29.7778	42	36.3333	11	37	41	48	48	34	27	0	16	17
chr5_6651955_6663079	+	29.7778	40.6667	30.6667	18	46	28	48	29	13	50	12	12	30
chr6_158733083_158735300	+	29.7778	10.6667	45.6667	33	13	8	11	62	34	41	39	26	34
chr6_17507400_17514185	+	29.7778	81.6667	0	7.66667	79	80	86	0	0	0	8	15	0
chr6_42559889_42562042	+	29.7778	44.3333	38.3333	6.66667	54	42	37	36	51	28	8	0	12
chr8_25265499_25266456	+	29.7778	34.6667	32.3333	22.3333	30	31	43	19	58	20	26	20	21
chr9_21476898_21477291	-	29.7778	62.6667	26.6667	0	73	54	61	13	37	30	0	0	0
chr12_72163580_72167802	+	29.6667	60.6667	23.3333	5	61	80	41	30	40	0	10	0	5
chr14_61278705_61346553	+	29.6667	49.6667	15.6667	23.6667	53	53	43	18	29	0	12	18	41
chr4_7840251_7845077	-	29.6667	77	12	0	66	71	94	36	0	0	0	0	0
chr4_79186179_79188586	+	29.6667	0	46.3333	42.6667	0	0	0	44	30	65	65	18	45
chr17_20921255_20931987	-	29.5556	24.6667	25.3333	38.6667	25	17	32	14	37	25	37	59	20
chr7_157015948_157018233	+	29.5556	29	27	32.6667	33	20	34	3	26	52	33	39	26
chr9_80409379_80430686	-	29.5556	43.6667	33	12	21	41	69	16	32	51	8	25	3
chr1_219366424_219385094	+	29.4444	50	24.6667	13.6667	45	64	41	29	22	23	14	11	16
chr12_46205201_46215270	+	29.4444	38.3333	33	17	49	34	32	25	21	53	17	9	25
chr2_45773871_45780869	-	29.4444	17.3333	49	22	26	14	12	28	64	55	20	30	16
chr22_40948110_40990739	-	29.4444	39.6667	34.6667	14	43	52	24	29	39	36	16	19	7
chr1_246890194_246903603	+	29.3333	74	11.6667	2.33333	72	63	87	0	0	35	0	0	7
chr10_28872328_28879761	+	29.3333	51	28	9	63	60	30	13	43	28	19	0	8
chr12_32760891_32764217	+	29.3333	55	15.6667	17.3333	51	43	71	18	29	0	26	21	5
chr17_18110129_18111689	+	29.3333	35.3333	41	11.6667	45	33	28	22	37	64	18	0	17
chr17_42501717_42513913	-	29.3333	23.6667	51.3333	13	19	29	23	81	51	22	14	14	11
chr19_21216262_21216990	+	29.3333	54	15	19	61	43	58	29	16	0	13	19	25
chr20_34309662_34313077	-	29.3333	20	34.6667	33.3333	11	16	33	20	48	36	31	24	45
chr3_119582266_119624699	-	29.3333	52.6667	28	7.33333	59	57	42	23	33	28	0	9	13
chr7_635783_751164	-	29.3333	4.66667	49	34.3333	6	0	8	29	68	50	42	22	39
chr1_231672959_231678357	+	29.2222	50.6667	14	23	37	46	69	0	22	20	10	32	27
chr10_22002701_22016857	+	29.2222	33.3333	39	15.3333	25	37	38	58	32	27	24	0	22
chr13_114164553_114175048	+	29.2222	32	34	21.6667	31	26	39	41	20	41	41	0	24
chr16_14687158_14698083	-	29.2222	50.3333	18	19.3333	67	38	46	9	24	21	0	20	38
chr3_49016915_49017929	+	29.2222	33	33	21.6667	26	18	55	14	22	63	24	28	13
chr4_110580167_110585550	+	29.2222	50.6667	36	1	66	41	45	45	12	51	3	0	0
chr4_186168448_186209236	+	29.2222	13.6667	68.6667	5.33333	19	9	13	69	83	54	7	0	9
chr5_131052258_131080383	-	29.2222	28	50.3333	9.33333	29	29	26	50	63	38	2	7	19
chr7_44880498_44882953	-	29.2222	25	45.3333	17.3333	24	23	28	35	33	68	27	13	12
chr12_48477374_48491907	-	29.1111	52.3333	12.6667	22.3333	53	60	44	15	23	0	8	18	41
chr15_63824846_63855207	+	29.1111	48	28.3333	11	49	47	48	25	24	36	15	0	18
chr18_13666478_13682104	-	29.1111	22.3333	55.6667	9.33333	22	25	20	43	59	65	8	5	15
chr6_13652891_13697128	-	29.1111	40.3333	29.3333	17.6667	33	36	52	13	48	27	10	23	20
chr1_172569204_172571927	+	29	23	33.6667	30.3333	33	21	15	45	33	23	37	11	43
chr18_59739906_59763183	-	29	60.3333	8.33333	18.3333	50	50	81	5	10	10	12	27	16
chr3_185638892_185641772	-	29	16.6667	52.3333	18	12	17	21	43	47	67	13	15	26
chr3_47762156_47787483	-	29	28.6667	26	32.3333	28	38	20	28	27	23	39	34	24
chr5_34175550_34182972	-	29	64.3333	7.33333	15.3333	66	72	55	0	7	15	29	0	17
chr1_198222170_198233365	+	28.8889	67	14.3333	5.33333	74	52	75	22	21	0	5	0	11
chr3_179481790_179483636	+	28.8889	47.3333	37.3333	2	52	43	47	35	25	52	6	0	0
chr3_48572945_48573896	-	28.8889	23.6667	43.6667	19.3333	21	19	31	26	50	55	35	0	23
chr7_618893_635941	-	28.8889	3	50.6667	33	0	7	2	36	46	70	28	41	30
chr11_118656761_118657227	-	28.7778	31	33.6667	21.6667	19	38	36	50	14	37	15	33	17
chr16_74491772_74493687	-	28.7778	14	27	45.3333	13	18	11	14	28	39	42	30	64
chr19_12783661_12784130	+	28.7778	35	37	14.3333	40	35	30	29	37	45	17	26	0
chr2_24046128_24046439	-	28.7778	29.3333	27.6667	29.3333	23	39	26	42	13	28	40	24	24
chr2_65559121_65572030	-	28.7778	20	44	22.3333	22	17	21	30	55	47	17	21	29
chr21_46538479_46548488	+	28.7778	82.6667	0	3.66667	79	82	87	0	0	0	3	8	0
chr19_10883155_10887892	+	28.6667	23	43	20	29	18	22	25	32	72	21	26	13
chr2_131829428_131840230	-	28.6667	19	49	18	19	16	22	38	16	93	23	14	17
chr2_75745182_75749613	-	28.6667	4	82	0	4	0	8	98	56	92	0	0	0
chr8_56854414_56860282	+	28.6667	52.6667	22.6667	10.6667	61	29	68	18	27	23	16	0	16
chr15_76566753_76585041	-	28.5556	48.3333	23	14.3333	61	53	31	50	19	0	0	19	24
chr16_14173147_14234617	+	28.5556	38.3333	22.6667	24.6667	21	50	44	11	20	37	11	37	26
chr16_4382216_4383520	+	28.5556	20.6667	65	0	27	20	15	49	64	82	0	0	0
chr7_80418622_80440017	-	28.5556	85.6667	0	0	67	89	101	0	0	0	0	0	0
chr8_124346118_124348772	-	28.5556	30.3333	38.3333	17	18	30	43	48	31	36	20	31	0
chr9_88284400_88296250	-	28.5556	72.3333	11	2.33333	55	87	75	33	0	0	0	0	7
chr19_30462100_30477324	+	28.4444	31.6667	21.6667	32	43	29	23	37	28	0	35	26	35
chr7_128220053_128232071	+	28.4444	8.66667	64	12.6667	6	14	6	49	104	39	0	15	23
chr8_48508373_48511758	+	28.4444	60.6667	12.3333	12.3333	68	39	75	20	17	0	7	17	13
chr1_9991949_9995685	-	28.3333	13.3333	32.6667	39	14	14	12	52	46	0	40	56	21
chr11_14316017_14317401	-	28.3333	40.6667	29.3333	15	45	45	32	36	21	31	16	11	18
chr17_80739465_80741590	+	28.3333	40.6667	24.3333	20	49	45	28	0	42	31	24	36	0
chr2_215657021_215661841	-	28.3333	23	47	15	21	25	23	53	35	53	17	18	10
chr2_230633332_230636348	-	28.3333	20	14.3333	50.6667	18	20	22	22	21	0	47	66	39
chr1_224142179_224149975	-	28.2222	38	35.6667	11	35	40	39	45	12	50	18	0	15
chr1_245165423_245180628	+	28.2222	49.3333	27.3333	8	35	63	50	40	22	20	9	0	15
chr15_60648118_60656722	-	28.2222	12.3333	71.6667	0.666667	16	13	8	35	85	95	2	0	0
chr19_41884186_41884424	+	28.2222	21.3333	43.6667	19.6667	22	23	19	13	63	55	20	5	34
chr20_44444180_44444552	+	28.2222	13	61.6667	10	7	18	14	64	43	78	10	9	11
chr4_151509200_151512011	-	28.2222	20	59.6667	5	16	15	29	51	72	56	9	0	6
chr6_106727536_106756366	-	28.2222	27	34.3333	23.3333	13	33	35	53	32	18	22	14	34
chr13_50279757_50280508	-	28.1111	12.3333	41.6667	30.3333	11	18	8	30	52	43	46	10	35
chr20_35835676_35838568	+	28.1111	20.3333	21.6667	42.3333	17	22	22	10	55	0	50	45	32
chr21_45513944_45518415	+	28.1111	20	55	9.33333	20	33	7	69	27	69	19	0	9
chr22_32134373_32134897	-	28.1111	51.6667	27.3333	5.33333	63	33	59	49	24	9	9	0	7
chr4_40892381_40895428	-	28.1111	45	17.6667	21.6667	38	48	49	0	19	34	35	0	30
chr10_114286846_114298089	+	28	46.6667	23.3333	14	55	32	53	17	25	28	8	16	18
chr10_99196948_99197507	-	28	60	16.6667	7.33333	51	98	31	14	25	11	13	0	9
chr19_45528587_45528995	+	28	11.3333	67.6667	5	9	14	11	61	83	59	8	0	7
chr22_38890635_38897285	-	28	15.3333	44	24.6667	14	9	23	36	41	55	11	45	18
chr3_27453133_27465643	-	28	36.3333	11.6667	36	28	41	40	9	0	26	32	38	38
chr3_37291189_37315092	+	28	48.3333	13.6667	22	49	40	56	24	17	0	22	28	16
chr1_169947226_170001116	-	27.8889	59	17.3333	7.33333	55	43	79	31	3	18	14	8	0
chr10_25226113_25231365	-	27.8889	30	15	38.6667	24	37	29	21	10	14	21	58	37
chr14_92559596_92563182	-	27.8889	37.3333	39	7.33333	38	46	28	29	20	68	9	13	0
chr16_58593708_58594266	-	27.8889	27.6667	35.6667	20.3333	42	15	26	40	56	11	24	23	14
chr3_141811903_141820683	-	27.8889	55.6667	19	9	66	51	50	17	21	19	12	10	5
chr3_150834125_150845771	+	27.8889	0	76.6667	7	0	0	0	57	52	121	6	0	15
chr6_111726673_111737675	-	27.8889	54	26.6667	3	65	55	42	16	10	54	9	0	0
chr7_91924203_91957214	+	27.8889	29.6667	44	10	29	18	42	64	52	16	0	13	17
chr1_160293221_160302347	-	27.7778	68.3333	11.6667	3.33333	55	82	68	26	9	0	6	0	4
chr21_27269885_27284274	-	27.7778	14.6667	48.6667	20	15	16	13	33	34	79	24	20	16
chr21_42598193_42629253	+	27.7778	3	70	10.3333	0	0	9	28	127	55	7	11	13
chr4_140263980_140265493	+	27.7778	54.3333	24.6667	4.33333	54	54	55	35	28	11	7	6	0
chr11_57258697_57259335	-	27.6667	0	15.3333	67.6667	0	0	0	13	33	0	78	63	62
chr12_27075549_27081838	-	27.6667	32.6667	34	16.3333	27	37	34	50	16	36	22	0	27
chr16_72122886_72124685	-	27.6667	18.6667	16.3333	48	27	14	15	20	24	5	37	72	35
chr2_28974904_29022165	+	27.6667	81.3333	0	1.66667	93	84	67	0	0	0	5	0	0
chr3_155637022_155643155	+	27.6667	42	29.3333	11.6667	38	57	31	23	47	18	26	0	9
chr5_61846194_61897675	+	27.6667	37.6667	35	10.3333	63	29	21	0	46	59	9	11	11
chr6_1960101_1961200	-	27.6667	22.6667	22	38.3333	35	14	19	39	8	19	46	26	43
chr6_90556281_90566918	+	27.6667	40	26.6667	16.3333	54	42	24	17	21	42	8	7	34
chr7_30590252_30601744	-	27.6667	28.6667	39	15.3333	32	18	36	42	30	45	16	15	15
chr8_141874411_141935848	-	27.6667	61.3333	11	10.6667	84	46	54	14	19	0	13	19	0
chr1_33097428_33099711	-	27.5556	13.6667	30.6667	38.3333	10	15	16	17	20	55	32	46	37
chr1_61743192_61824946	+	27.5556	81	1.66667	0	93	73	77	5	0	0	0	0	0
chr16_14738131_14738466	+	27.5556	28	37.3333	17.3333	26	27	31	54	32	26	25	0	27
chr2_236649607_236659132	+	27.5556	43.3333	32	7.33333	44	37	49	26	37	33	14	0	8
chr22_28290543_28293880	-	27.5556	33.3333	27.3333	22	35	25	40	50	12	20	24	21	21
chr22_30374431_30394846	+	27.5556	45	31.3333	6.33333	47	46	42	30	37	27	13	0	6
chr3_138289160_138290198	-	27.5556	0	74.3333	8.33333	0	0	0	54	107	62	14	0	11
chr5_153413351_153414527	-	27.5556	23.3333	37.6667	21.6667	14	30	26	49	43	21	23	16	26
chr6_159026299_159029782	+	27.5556	19.3333	23.6667	39.6667	28	21	9	8	34	29	52	49	18
chr7_92921015_92940584	+	27.5556	20.6667	55.3333	6.66667	34	16	12	76	40	50	5	15	0
chr8_141285757_141301177	-	27.5556	3.33333	65.3333	14	10	0	0	76	55	65	26	13	3
chrX_44870206_44879975	+	27.5556	56.6667	23.6667	2.33333	42	64	64	19	0	52	7	0	0
chr1_21102217_21102498	-	27.4444	64	5.66667	12.6667	72	27	93	0	0	17	10	14	14
chr12_122218778_122219098	-	27.4444	26.3333	52.6667	3.33333	17	38	24	20	70	68	3	7	0
chr14_61482622_61512885	+	27.4444	82.3333	0	0	48	82	117	0	0	0	0	0	0
chr16_89961446_89967202	+	27.4444	24	37.6667	20.6667	34	27	11	24	52	37	30	10	22
chr17_7402358_7402810	+	27.4444	18.3333	41.3333	22.6667	23	12	20	39	58	27	27	19	22
chr19_16790795_16793319	+	27.4444	27	27.6667	27.6667	30	20	31	13	16	54	21	29	33
chr2_78225204_78252550	-	27.4444	58	11.6667	12.6667	75	42	57	0	14	21	14	13	11
chr20_17933231_17934761	-	27.4444	39.3333	18.6667	24.3333	45	32	41	8	12	36	35	14	24
chr4_170076631_170077830	-	27.4444	23.3333	45	14	17	31	22	36	58	41	9	24	9
chr1_230798887_230807386	+	27.3333	41	30.6667	10.3333	34	30	59	44	48	0	15	11	5
chr11_11895347_11901927	+	27.3333	65.3333	5.33333	11.3333	65	72	59	0	0	16	10	14	10
chr12_123798167_123800207	-	27.3333	51	26	5	49	51	53	29	33	16	5	0	10
chr20_33961987_33971936	-	27.3333	17.3333	25.3333	39.3333	26	12	14	17	59	0	16	51	51
chr6_2779497_2784637	+	27.3333	30.3333	33.3333	18.3333	32	36	23	31	35	34	16	28	11
chr13_42385361_42407667	-	27.2222	30.6667	41	10	25	42	25	43	40	40	19	0	11
chr15_77759437_77764156	+	27.2222	48	18.3333	15.3333	38	63	43	15	26	14	9	16	21
chr4_38091553_38104778	+	27.2222	22.3333	39.6667	19.6667	13	23	31	36	49	34	27	25	7
chr15_63845914_63855207	+	27.1111	38	24.3333	19	46	39	29	29	15	29	20	16	21
chr18_19371335_19383975	+	27.1111	34.6667	29.3333	17.3333	38	39	27	26	21	41	23	0	29
chr19_6262239_6270770	-	27.1111	59.3333	7	15	82	43	53	10	11	0	17	23	5
chr2_128855003_128861588	+	27.1111	27.3333	36.6667	17.3333	46	17	19	16	37	57	18	23	11
chr22_28910745_28915308	-	27.1111	81.3333	0	0	72	88	84	0	0	0	0	0	0
chr5_128440649_128442755	+	27.1111	20.6667	54	6.66667	17	33	12	27	64	71	10	0	10
chr6_126332399_126334247	+	27.1111	31	19.6667	30.6667	28	28	37	12	29	18	36	20	36
chr6_87925621_87943245	+	27.1111	51.6667	28.3333	1.33333	47	40	68	43	42	0	4	0	0
chr9_139115609_139118720	-	27.1111	20.6667	30.6667	30	21	30	11	17	44	31	24	19	47
chrX_299339_302666	-	27.1111	24	41.6667	15.6667	37	23	12	39	53	33	4	21	22
chrX_77270159_77275895	+	27.1111	36.6667	11	33.6667	40	46	24	14	2	17	23	45	33
chr1_6867043_6885270	+	27	27.6667	31	22.3333	37	19	27	32	31	30	22	19	26
chr15_65110145_65111422	-	27	44.6667	11.3333	25	45	40	49	3	14	17	26	0	49
chr17_67270084_67280213	-	27	36.6667	31.6667	12.6667	37	21	52	27	32	36	7	18	13
chr17_80721841_80730383	+	27	22.6667	44	14.3333	29	19	20	43	60	29	18	25	0
chr18_12814202_12836890	-	27	7.33333	49	24.6667	3	9	10	42	34	71	18	29	27
chr19_38198815_38202593	-	27	33	31	17	37	36	26	33	7	53	11	28	12
chr20_36694205_36694658	+	27	20.3333	34.6667	26	21	22	18	15	50	39	16	23	39
chrX_133607389_133627620	+	27	36	16.3333	28.6667	32	36	40	19	19	11	13	27	46
chr10_49609655_49613024	+	26.8889	42.6667	25	13	53	33	42	8	53	14	13	14	12
chr5_80021272_80057497	+	26.8889	38	26.3333	16.3333	52	24	38	23	22	34	11	26	12
chr7_65705312_65706257	+	26.8889	28.6667	44	8	23	47	16	57	23	52	13	0	11
chr8_30332295_30361953	+	26.8889	74.3333	3.33333	3	83	62	78	0	0	10	0	9	0
chr1_51001041_51061888	-	26.7778	18	20.6667	41.6667	16	17	21	10	35	17	25	53	47
chr2_197777606_197786910	-	26.7778	10	43.3333	27	13	4	13	77	28	25	24	44	13
chr2_61605498_61622368	-	26.7778	16	53.3333	11	8	24	16	76	34	50	0	18	15
chr21_35475134_35475818	+	26.7778	0	58	22.3333	0	0	0	63	65	46	31	0	36
chr6_83667031_83754378	-	26.7778	14.6667	27.6667	38	15	12	17	55	21	7	39	27	48
chr1_109884636_109888503	-	26.6667	11.3333	60	8.66667	12	12	10	48	58	74	17	0	9
chr1_150997087_150998149	+	26.6667	19	39.6667	21.3333	26	16	15	15	49	55	23	22	19
chr1_197621365_197643299	-	26.6667	54	11.3333	14.6667	70	41	51	0	15	19	23	12	9
chr10_116719485_116734144	+	26.6667	51.6667	26.6667	1.66667	57	48	50	30	20	30	5	0	0
chr12_11199619_11273779	-	26.6667	43	22	15	43	49	37	20	36	10	14	19	12
chr12_62877950_62895478	+	26.6667	74.6667	5.33333	0	85	88	51	0	16	0	0	0	0
chr15_43707792_43708614	-	26.6667	58	9.33333	12.6667	49	63	62	9	19	0	16	13	9
chr19_10602253_10602938	-	26.6667	0	62.6667	17.3333	0	0	0	94	46	48	22	18	12
chr19_34685383_34706566	+	26.6667	2	74.6667	3.33333	0	0	6	47	65	112	10	0	0
chr5_137284644_137284873	-	26.6667	58.6667	13.6667	7.66667	66	63	47	20	21	0	14	0	9
chr6_89554076_89601634	-	26.6667	30.6667	24.6667	24.6667	36	16	40	16	20	38	18	33	23
chr12_77214838_77216311	+	26.5556	20.3333	32	27.3333	12	22	27	23	26	47	27	28	27
chr15_50592986_50593565	-	26.5556	22	31.6667	26	22	20	24	23	20	52	29	23	26
chr15_56243574_56258744	-	26.5556	70.3333	9.33333	0	51	94	66	0	28	0	0	0	0
chr17_15905229_15909882	+	26.5556	27.3333	48.3333	4	35	19	28	43	34	68	12	0	0
chr17_57647879_57650596	+	26.5556	38.6667	21.6667	19.3333	42	34	40	13	39	13	24	14	20
chr19_1271328_1272050	+	26.5556	20.6667	44	15	24	21	17	41	43	48	24	12	9
chr2_198367763_198368054	+	26.5556	9.66667	48.6667	21.3333	10	12	7	74	41	31	16	18	30
chr2_9496176_9508648	+	26.5556	14	50.3333	15.3333	6	18	18	75	41	35	23	0	23
chr3_51575514_51624575	+	26.5556	38.6667	21	20	25	34	57	5	34	24	11	25	24
chrX_79988955_79991587	-	26.5556	55	21.3333	3.33333	57	72	36	21	17	26	10	0	0
chr10_95140976_95148911	-	26.4444	31.3333	39.3333	8.66667	29	44	21	49	34	35	13	0	13
chr17_81006347_81006661	-	26.4444	70.6667	0	8.66667	63	91	58	0	0	0	13	0	13
chr3_195047614_195066046	-	26.4444	52.6667	25.3333	1.33333	58	59	41	19	23	34	4	0	0
chr8_124031435_124042956	-	26.4444	48	21.6667	9.66667	51	53	40	16	16	33	16	0	13
chr1_108690901_108703915	-	26.3333	60.6667	10.6667	7.66667	55	76	51	0	0	32	7	14	2
chr11_108098322_108106561	+	26.3333	2.66667	31.6667	44.6667	8	0	0	38	41	16	61	55	18
chr11_1307232_1311639	-	26.3333	2.33333	41.3333	35.3333	7	0	0	17	42	65	31	41	34
chr13_101936284_101944717	-	26.3333	79	0	0	75	106	56	0	0	0	0	0	0
chr16_30715385_30715636	+	26.3333	21	31	27	30	0	33	36	20	37	40	17	24
chr3_47079156_47088111	-	26.3333	54	16	9	51	69	42	0	25	23	16	0	11
chr3_49547852_49548252	+	26.3333	33	42.3333	3.66667	34	35	30	61	51	15	11	0	0
chr6_89479493_89554240	-	26.3333	30.6667	32.3333	16	41	31	20	45	22	30	5	20	23
chr8_48308936_48320523	+	26.3333	57.6667	21.3333	0	42	68	63	11	10	43	0	0	0
chr12_39154649_39170103	-	26.2222	69	9.66667	0	47	90	70	0	0	29	0	0	0
chr17_28811232_28819771	+	26.2222	36	31.3333	11.3333	51	36	21	29	24	41	12	0	22
chr18_46889531_46906128	-	26.2222	38.6667	27.3333	12.6667	33	42	41	21	27	34	19	7	12
chr19_20975318_20976684	+	26.2222	49	20	9.66667	43	59	45	14	22	24	14	0	15
chr6_158870028_158873300	+	26.2222	9	20.3333	49.3333	13	11	3	21	9	31	68	33	47
chrX_102094729_102120080	+	26.2222	21.6667	35	22	25	19	21	29	31	45	29	9	28
chr16_47497810_47549512	+	26.1111	33.3333	18	27	27	42	31	21	11	22	28	26	27
chr2_58275962_58316858	+	26.1111	41.6667	10.6667	26	43	27	55	18	14	0	32	24	22
chr3_119624602_119635021	-	26.1111	27.3333	46.3333	4.66667	31	22	29	42	22	75	8	0	6
chr4_123856869_123900541	+	26.1111	46	20	12.3333	63	45	30	15	20	25	13	9	15
chr4_36230204_36231267	-	26.1111	23.3333	48.3333	6.66667	19	24	27	77	30	38	9	0	11
chr1_154213989_154218851	+	26	39.6667	19	19.3333	32	25	62	17	21	19	31	19	8
chr11_63918711_63919865	-	26	8.66667	12.6667	56.6667	0	9	17	24	14	0	45	75	50
chr13_20576990_20580726	+	26	20.3333	33	24.6667	33	16	12	14	76	9	13	37	24
chr17_57808782_57851246	+	26	14	46.3333	17.6667	13	9	20	72	67	0	14	28	11
chr2_203329532_203332412	+	26	22.6667	48	7.33333	22	33	13	22	46	76	0	22	0
chr5_154330381_154346797	+	26	3.33333	27	47.6667	6	0	4	43	22	16	49	39	55
chr9_33953283_33956144	-	26	8	48	22	9	5	10	60	36	48	13	27	26
chr1_151139410_151139890	+	25.8889	27.6667	22	28	22	47	14	10	32	24	30	23	31
chr18_9931807_9950565	+	25.8889	52	23.6667	2	31	71	54	32	26	13	0	0	6
chr2_43655239_43657441	-	25.8889	7.66667	44	26	4	8	11	39	21	72	18	33	27
chr20_2967411_2969120	+	25.8889	16.3333	38.6667	22.6667	31	11	7	39	49	28	18	28	22
chr3_47719688_47727660	-	25.8889	15.3333	39	23.3333	13	19	14	32	25	60	30	18	22
chr5_137733867_137735701	+	25.8889	22	40	15.6667	24	17	25	32	48	40	10	24	13
chr5_37326003_37328522	-	25.8889	35.6667	16	26	32	28	47	0	6	42	35	22	21
chr6_20739750_20781496	+	25.8889	44.6667	5	28	49	42	43	0	9	6	24	18	42
chr7_137597737_137600758	-	25.8889	51	24	2.66667	47	49	57	29	24	19	8	0	0
chr10_27431316_27434519	-	25.7778	47	25	5.33333	53	51	37	34	29	12	16	0	0
chr12_27143383_27152609	-	25.7778	17.3333	39	21	9	32	11	32	20	65	10	20	33
chr16_984190_1004666	-	25.7778	33.6667	24.6667	19	38	36	27	0	37	37	41	0	16
chr4_41496553_41553412	+	25.7778	77.3333	0	0	73	63	96	0	0	0	0	0	0
chr5_176671196_176673797	+	25.7778	23.3333	25.6667	28.3333	27	25	18	48	19	10	28	34	23
chr6_30856465_30857207	+	25.7778	5	70.6667	1.66667	7	0	8	62	115	35	5	0	0
chr7_155093276_155094127	+	25.7778	23	37.3333	17	23	18	28	36	16	60	7	16	28
chr9_114332371_114348445	-	25.7778	61	16.3333	0	65	56	62	22	27	0	0	0	0
chr9_36597219_36607670	+	25.7778	30.3333	31	16	49	32	10	26	17	50	24	9	15
chr11_72468812_72470426	-	25.6667	0	11.3333	65.6667	0	0	0	15	19	0	80	67	50
chr16_22236975_22237296	+	25.6667	44.3333	27.3333	5.33333	40	51	42	10	57	15	12	4	0
chr18_55833020_55919286	+	25.6667	56.6667	17	3.33333	22	60	88	26	0	25	3	0	7
chr7_157449049_157475629	-	25.6667	0	9.33333	67.6667	0	0	0	11	17	0	82	72	49
chr7_44714010_44715748	+	25.6667	19.6667	42.6667	14.6667	26	10	23	18	23	87	15	15	14
chrX_100356047_100364987	+	25.6667	25	39	13	31	21	23	28	33	56	10	0	29
chr10_120460818_120489922	-	25.5556	20.3333	42.6667	13.6667	27	22	12	36	19	73	13	20	8
chr10_35349802_35360267	-	25.5556	35	28.3333	13.3333	29	44	32	37	25	23	18	0	22
chr11_107200644_107224462	-	25.5556	33.3333	28.6667	14.6667	35	44	21	21	37	28	14	18	12
chr12_98921664_98931350	+	25.5556	35.3333	22.6667	18.6667	39	25	42	30	35	3	3	24	29
chr17_11998892_12016677	+	25.5556	76.6667	0	0	53	77	100	0	0	0	0	0	0
chr2_232952197_232952750	+	25.5556	18	23.3333	35.3333	28	6	20	8	28	34	26	50	30
chr2_61340905_61345251	+	25.5556	44.6667	16	16	38	59	37	12	9	27	7	22	19
chr4_108603171_108608333	-	25.5556	14	61	1.66667	27	7	8	60	46	77	5	0	0
chr6_160412216_160431817	+	25.5556	49.3333	20	7.33333	30	54	64	23	14	23	10	8	4
chr7_102665510_102669865	-	25.5556	12.3333	41	23.3333	23	0	14	36	42	45	15	17	38
chr7_33397467_33427756	+	25.5556	26	39	11.6667	15	37	26	48	30	39	5	20	10
chr7_8257935_8275635	-	25.5556	20	44.3333	12.3333	23	20	17	38	38	57	8	15	14
chr1_28601336_28605752	+	25.4444	73.6667	0	2.66667	84	74	63	0	0	0	8	0	0
chr10_96005703_96006378	+	25.4444	76.3333	0	0	71	60	98	0	0	0	0	0	0
chr15_41988273_41991357	+	25.4444	26	24.3333	26	19	40	19	15	38	20	10	31	37
chr15_78885434_78885970	+	25.4444	50.6667	15	10.6667	33	67	52	28	17	0	6	14	12
chr16_9014216_9024254	-	25.4444	34.6667	24.6667	17	44	24	36	29	45	0	14	16	21
chr2_105912813_105915162	-	25.4444	22.6667	45.3333	8.33333	20	22	26	35	49	52	12	0	13
chr20_47682729_47683817	+	25.4444	12	32.6667	31.6667	4	22	10	28	35	35	32	35	28
chr3_124560230_124578293	-	25.4444	16.3333	55.6667	4.33333	14	24	11	69	58	40	0	0	13
chr3_138244332_138256189	-	25.4444	14.6667	44.6667	17	14	17	13	26	66	42	24	12	15
chr3_52952500_52962357	-	25.4444	18	30	28.3333	12	20	22	32	41	17	27	28	30
chr4_3188324_3190820	+	25.4444	21	37.6667	17.6667	20	16	27	9	58	46	33	0	20
chr5_167915607_167924353	+	25.4444	33	37	6.33333	45	29	25	32	33	46	11	8	0
chr5_32268807_32276848	-	25.4444	35	17.3333	24	36	32	37	12	40	0	25	31	16
chr8_8873832_8877974	+	25.4444	55.3333	5	16	52	43	71	0	0	15	15	10	23
chrX_76812922_76814317	-	25.4444	32.3333	18.3333	25.6667	18	52	27	18	7	30	25	28	24
chr1_77672325_77678032	-	25.3333	50	12.3333	13.6667	44	67	39	28	9	0	18	23	0
chr11_36103203_36120011	+	25.3333	41	29.6667	5.33333	47	46	30	37	27	25	16	0	0
chr12_13061177_13062105	+	25.3333	35.6667	34.3333	6	44	24	39	46	28	29	18	0	0
chr15_94899366_94945248	+	25.3333	60	4.33333	11.6667	47	80	53	13	0	0	10	14	11
chr16_72845476_72845937	-	25.3333	39	19.3333	17.6667	32	36	49	14	28	16	28	18	7
chr16_87376483_87380856	-	25.3333	42.3333	11.6667	22	59	26	42	24	11	0	22	23	21
chr2_29129326_29137074	+	25.3333	2.33333	46.3333	27.3333	0	7	0	0	62	77	32	34	16
chr5_179135240_179136060	+	25.3333	9	45.6667	21.3333	12	7	8	53	27	57	13	24	27
chr6_106696025_106740981	-	25.3333	29.6667	35.6667	10.6667	33	20	36	59	17	31	17	0	15
chr9_115013209_115060196	-	25.3333	24.6667	31.6667	19.6667	23	23	28	35	38	22	27	12	20
chr1_1192372_1203372	-	25.2222	8.33333	30	37.3333	13	7	5	34	45	11	52	26	34
chr1_159888553_159890327	-	25.2222	23.6667	37.6667	14.3333	31	19	21	50	25	38	28	0	15
chr14_21971316_21972024	-	25.2222	17	35	23.6667	29	0	22	31	60	14	36	0	35
chr16_66971940_66973261	+	25.2222	8.66667	51	16	4	9	13	40	31	82	19	0	29
chr3_155611307_155615830	+	25.2222	31.6667	20.3333	23.6667	41	39	15	14	27	20	14	39	18
chr6_151198770_151209117	+	25.2222	29.6667	6	40	23	22	44	0	8	10	37	57	26
chr8_9437669_9437893	+	25.2222	53.3333	7	15.3333	53	58	49	0	21	0	25	0	21
chr10_135209217_135216277	+	25.1111	16.3333	33	26	16	13	20	28	37	34	20	0	58
chr15_94899366_94928754	+	25.1111	67	8.33333	0	71	60	70	0	0	25	0	0	0
chr16_396148_397106	-	25.1111	22.6667	22.6667	30	20	25	23	12	20	36	31	21	38
chr17_28808161_28811788	+	25.1111	11.3333	34.6667	29.3333	19	6	9	33	43	28	37	21	30
chr2_217005909_217026771	+	25.1111	35	36.3333	4	29	26	50	40	29	40	12	0	0
chr2_234296903_234307095	+	25.1111	4.66667	52.6667	18	10	4	0	61	59	38	9	23	22
chr3_119624602_119642330	-	25.1111	43	24	8.33333	55	35	39	27	45	0	9	0	16
chr4_128842679_128861152	-	25.1111	45	29	1.33333	57	36	42	28	26	33	4	0	0
chr7_4780469_4780654	+	25.1111	17.6667	23	34.6667	20	19	14	7	13	49	28	35	41
chr9_114840818_114842445	-	25.1111	28.3333	34	13	39	24	22	32	29	41	13	0	26
chr1_243385026_243388623	-	25	53.3333	10.6667	11	44	48	68	14	18	0	8	0	25
chr10_69902697_69909868	+	25	75	0	0	87	74	64	0	0	0	0	0	0
chr2_135075100_135076310	+	25	4	56.3333	14.6667	12	0	0	43	44	82	0	0	44
chr2_240158289_240274613	-	25	24	24.6667	26.3333	29	31	12	13	46	15	41	0	38
chr20_32617575_32619410	+	25	23.3333	39	12.6667	0	44	26	43	60	14	18	0	20
chr3_12458203_12458653	+	25	50.3333	10.6667	14	46	57	48	6	0	26	17	10	15
chr3_133341935_133343019	-	25	20	37	18	31	22	7	51	20	40	16	26	12
chr7_74119496_74131270	+	25	33.6667	30.6667	10.6667	37	22	42	31	61	0	9	0	23
chr9_115024715_115060196	-	25	36	22.3333	16.6667	29	45	34	30	37	0	15	21	14
chr10_126727566_126811437	-	24.8889	43.6667	20	11	58	39	34	40	20	0	14	0	19
chr10_93841077_93851701	-	24.8889	69	5.66667	0	70	68	69	0	17	0	0	0	0
chr13_95813443_95818621	-	24.8889	10.3333	31.6667	32.6667	5	15	11	22	30	43	33	33	32
chr14_31139462_31144271	+	24.8889	54.3333	12.6667	7.66667	38	50	75	20	18	0	2	15	6
chr15_41036245_41037457	-	24.8889	30.3333	16	28.3333	35	24	32	7	17	24	19	39	27
chr15_73064124_73067438	-	24.8889	27.3333	28.6667	18.6667	30	26	26	37	25	24	15	25	16
chr22_18975270_18975708	+	24.8889	31.6667	6.66667	36.3333	29	15	51	6	3	11	49	30	30
chr9_33996221_34017187	-	24.8889	19	46.6667	9	19	20	18	34	35	71	11	10	6
chr14_75136352_75138186	-	24.7778	42.3333	19	13	47	50	30	15	24	18	16	15	8
chr15_66641398_66641775	-	24.7778	34	23.6667	16.6667	25	50	27	18	16	37	17	19	14
chr15_89790860_89804074	+	24.7778	34.3333	5.33333	34.6667	21	58	24	0	16	0	18	64	22
chr17_3717616_3719564	-	24.7778	21.3333	29.3333	23.6667	25	7	32	24	13	51	37	0	34
chr18_12506476_12535600	-	24.7778	46	17.6667	10.6667	60	43	35	23	30	0	15	17	0
chr19_37203288_37203769	+	24.7778	13	52.6667	8.66667	16	14	9	55	57	46	5	12	9
chr2_173435454_173460751	+	24.7778	27.6667	34.6667	12	35	32	16	20	44	40	21	11	4
chr2_32117061_32145979	-	24.7778	20	31.3333	23	23	28	9	29	21	44	15	25	29
chr6_106696025_106756366	-	24.7778	43.3333	10	21	56	39	35	16	14	0	18	24	21
chr7_35707044_35712888	-	24.7778	26.6667	24.6667	23	33	19	28	27	15	32	7	41	21
chr9_108483818_108484902	+	24.7778	48.6667	11	14.6667	47	70	29	0	0	33	7	25	12
chr10_104018686_104103939	+	24.6667	74	0	0	75	83	64	0	0	0	0	0	0
chr22_38208894_38209616	+	24.6667	39.6667	10.6667	23.6667	18	59	42	0	0	32	18	27	26
chr3_41746549_41759353	-	24.6667	26	37	11	30	30	18	27	50	34	16	0	17
chr7_142989393_142989791	+	24.6667	15.6667	32.3333	26	15	19	13	37	35	25	19	43	16
chr13_96361481_96377506	+	24.5556	33.6667	15.6667	24.3333	43	22	36	8	19	20	27	32	14
chr2_122283421_122287901	-	24.5556	28.3333	35.3333	10	31	18	36	23	47	36	10	20	0
chr3_122808015_122811289	+	24.5556	29.6667	24.3333	19.6667	54	20	15	20	39	14	35	16	8
chr5_179132680_179137066	+	24.5556	34.3333	30.3333	9	35	28	40	42	49	0	14	0	13
chr6_161455291_161471011	+	24.5556	38	28	7.66667	48	38	28	42	42	0	12	0	11
chr8_42919244_42932507	+	24.5556	39.6667	26	8	13	69	37	20	35	23	10	0	14
chr9_100780571_100788733	+	24.5556	49	22.6667	2	65	39	43	10	15	43	6	0	0
chr9_100839200_100840629	+	24.5556	37.6667	9.66667	26.3333	51	30	32	0	8	21	15	61	3
chr15_64404772_64411053	+	24.4444	28.3333	26.3333	18.6667	23	29	33	22	29	28	24	0	32
chr19_5032877_5041262	+	24.4444	28.6667	30.6667	14	28	30	28	46	46	0	10	13	19
chr2_74392345_74399879	-	24.4444	14.3333	33	26	26	3	14	9	42	48	27	23	28
chr2_9490937_9499018	+	24.4444	4.66667	54.6667	14	0	14	0	57	54	53	12	13	17
chr20_30380538_30382351	+	24.4444	20	44.3333	9	14	27	19	33	39	61	16	0	11
chr21_17150223_17177577	+	24.4444	34	19.6667	19.6667	30	29	43	17	37	5	23	21	15
chr3_119219542_119222868	+	24.4444	33	25	15.3333	32	35	32	0	48	27	4	13	29
chr6_57072426_57075243	-	24.4444	55.3333	4	14	47	64	55	0	12	0	15	22	5
chr11_28080473_28084063	-	24.3333	33	29	11	27	41	31	36	41	10	6	15	12
chr11_85707869_85714494	-	24.3333	40.6667	25.3333	7	58	34	30	27	23	26	21	0	0
chr18_76856476_76914555	+	24.3333	35	21	17	33	51	21	23	20	20	13	19	19
chr1_175996708_176015460	-	24.2222	49.6667	22.3333	0.666667	49	51	49	19	34	14	2	0	0
chr1_225718256_225755116	-	24.2222	66.3333	4	2.33333	69	65	65	12	0	0	7	0	0
chr1_227192695_227204751	-	24.2222	55.6667	10.3333	6.66667	61	56	50	0	8	23	6	8	6
chr15_25599500_25605674	-	24.2222	20.3333	40.6667	11.6667	12	27	22	34	45	43	6	11	18
chr15_36936479_36950106	+	24.2222	26	43	3.66667	19	20	39	31	24	74	11	0	0
chr2_47202112_47206046	+	24.2222	24.6667	41	7	23	25	26	82	28	13	12	0	9
chr22_46829290_46835308	-	24.2222	49	21.6667	2	60	41	46	25	12	28	0	0	6
chr7_35006506_35029553	-	24.2222	29	18	25.6667	38	20	29	33	21	0	32	23	22
chrX_21869627_21871621	+	24.2222	72.6667	0	0	67	83	68	0	0	0	0	0	0
chr1_45553553_45553909	-	24.1111	38.3333	6.33333	27.6667	50	36	29	0	0	19	27	25	31
chr1_8616534_8674745	-	24.1111	33.6667	23	15.6667	40	25	36	34	12	23	13	17	17
chr10_486811_532470	-	24.1111	72.3333	0	0	69	83	65	0	0	0	0	0	0
chr12_124123811_124137282	+	24.1111	37.6667	18.6667	16	32	50	31	23	12	21	10	29	9
chr12_70149164_70150443	+	24.1111	2.33333	45.3333	24.6667	7	0	0	16	32	88	25	17	32
chr16_11647389_11650591	-	24.1111	48.6667	18.6667	5	70	40	36	13	18	25	8	7	0
chr17_57128575_57134415	-	24.1111	25.6667	34	12.6667	30	24	23	50	35	17	14	10	14
chr2_15691617_15698758	-	24.1111	54.3333	10.3333	7.66667	61	54	48	0	10	21	23	0	0
chr4_88005272_88012981	+	24.1111	65.6667	6.66667	0	73	78	46	0	0	20	0	0	0
chrX_75367088_75368291	-	24.1111	21	26.3333	25	30	17	16	18	24	37	31	20	24
chr10_12272947_12280484	+	24	31.3333	10.3333	30.3333	20	47	27	16	15	0	28	25	38
chr12_27786295_27788048	+	24	10.6667	55.3333	6	13	8	11	75	37	54	6	12	0
chr16_28157415_28167848	-	24	43.3333	20	8.66667	47	40	43	12	12	36	7	5	14
chr17_41576230_41582193	+	24	20	33.6667	18.3333	27	11	22	40	41	20	11	32	12
chr17_5250085_5253924	+	24	17	28.6667	26.3333	20	13	18	0	46	40	22	31	26
chr21_30693542_30693835	+	24	47	12	13	51	45	45	16	15	5	11	28	0
chr3_33661095_33686395	-	24	25.3333	37	9.66667	18	29	29	51	14	46	10	9	10
chr9_111812563_111826847	-	24	21.3333	33	17.6667	25	15	24	33	19	47	7	35	11
chr1_213290659_213303232	+	23.8889	35.3333	24.3333	12	18	49	39	13	25	35	0	28	8
chr15_56434976_56535485	-	23.8889	46.6667	8.66667	16.3333	33	52	55	19	7	0	13	26	10
chr4_17816476_17816981	+	23.8889	15.3333	41.3333	15	23	11	12	47	19	58	15	22	8
chr5_170345717_170395381	+	23.8889	52	17.3333	2.33333	55	46	55	35	17	0	0	7	0
chr8_22332467_22333137	+	23.8889	34.3333	29.3333	8	22	40	41	55	17	16	10	14	0
chr1_227381487_227400920	-	23.7778	48.6667	13.3333	9.33333	45	48	53	11	7	22	8	14	6
chr12_123030723_123032516	+	23.7778	25	16	30.3333	28	24	23	10	0	38	11	36	44
chr14_50941795_50952912	-	23.7778	52.6667	14	4.66667	56	47	55	12	14	16	9	0	5
chr15_40895113_40903709	+	23.7778	47.3333	17.3333	6.66667	24	61	57	0	52	0	0	0	20
chr16_21979949_21987564	+	23.7778	18.3333	20	33	16	25	14	17	22	21	26	38	35
chr17_27778473_27794234	+	23.7778	29	25.3333	17	26	33	28	14	10	52	18	7	26
chr21_45499445_45500008	+	23.7778	4.66667	54.3333	12.3333	6	2	6	69	21	73	6	21	10
chr3_52988333_53003274	-	23.7778	34.3333	17.3333	19.6667	41	37	25	6	24	22	17	27	15
chr4_103225474_103236899	-	23.7778	28.3333	36.6667	6.33333	25	33	27	19	58	33	8	0	11
chr7_65429310_65432894	-	23.7778	16.3333	42.3333	12.6667	11	20	18	30	27	70	20	0	18
chr8_145737775_145738154	-	23.7778	7.66667	38.6667	25	5	12	6	29	58	29	43	22	10
chr1_36213508_36214205	-	23.6667	29	22.3333	19.6667	34	32	21	0	19	48	15	22	22
chr10_72285679_72291210	+	23.6667	0	27	44	0	0	0	28	21	32	52	24	56
chr11_755879_760253	+	23.6667	23.6667	36.3333	11	14	32	25	24	29	56	21	6	6
chr2_174987908_175006728	-	23.6667	26.6667	38.6667	5.66667	29	8	43	50	10	56	9	0	8
chr1_225600156_225603034	-	23.5556	39	14	17.6667	29	54	34	13	11	18	7	30	16
chr13_99061592_99064288	+	23.5556	12.3333	31.6667	26.6667	12	14	11	15	58	22	21	50	9
chr17_80828100_80869665	+	23.5556	10	46	14.6667	16	9	5	84	10	44	13	18	13
chr17_994905_1003975	-	23.5556	9	45.6667	16	14	7	6	72	35	30	32	7	9
chr4_140037803_140060651	-	23.5556	58.3333	10.3333	2	64	60	51	0	8	23	6	0	0
chr7_102743498_102769239	-	23.5556	7	40.6667	23	3	0	18	41	13	68	16	41	12
chr8_126692177_126738132	+	23.5556	0	70.6667	0	0	0	0	74	72	66	0	0	0
chr1_222897434_222898897	+	23.4444	25.6667	20	24.6667	29	28	20	11	16	33	23	38	13
chr13_28840852_28845003	+	23.4444	12.6667	43.3333	14.3333	11	19	8	38	55	37	14	11	18
chr14_61497163_61512885	+	23.4444	66	4.33333	0	83	40	75	0	13	0	0	0	0
chr15_44776422_44778898	+	23.4444	39	22.6667	8.66667	51	34	32	28	25	15	16	0	10
chr15_60734615_60737990	-	23.4444	20	36	14.3333	24	17	19	17	45	46	15	28	0
chr17_20921255_20924539	-	23.4444	21.3333	19	30	40	9	15	25	32	0	22	44	24
chr2_26321531_26332775	+	23.4444	26.3333	28	16	45	17	17	42	23	19	7	28	13
chr2_62227836_62228117	+	23.4444	30.6667	37	2.66667	45	22	25	33	41	37	8	0	0
chr7_40037093_40041630	+	23.4444	53.6667	3.66667	13	40	50	71	0	0	11	5	16	18
chr8_42183488_42186732	+	23.4444	29.3333	26.3333	14.6667	26	25	37	33	6	40	12	21	11
chr8_6582391_6590171	+	23.4444	42.3333	6	22	27	45	55	0	8	10	25	7	34
chrX_130883334_130928494	-	23.4444	15	17.3333	38	19	15	11	24	15	13	45	22	47
chr1_118454616_118461358	-	23.3333	23.6667	32.3333	14	29	29	13	36	16	45	21	17	4
chr1_211526581_211527809	+	23.3333	1.33333	5.66667	63	4	0	0	0	0	17	83	40	66
chr10_89685270_89693008	+	23.3333	63.6667	2	4.33333	49	68	74	0	6	0	13	0	0
chr11_9308002_9321248	-	23.3333	39.3333	20.3333	10.3333	47	29	42	36	14	11	10	14	7
chr12_27183091_27185614	+	23.3333	28	16.6667	25.3333	22	30	32	17	33	0	30	21	25
chr12_922808_939326	+	23.3333	35.6667	25	9.33333	39	32	36	53	9	13	15	0	13
chr22_50169239_50171461	-	23.3333	20.3333	20.3333	29.3333	24	11	26	14	32	15	32	28	28
chr6_5368783_5369415	+	23.3333	38.3333	13.6667	18	51	32	32	22	19	0	19	19	16
chr9_140685300_140695436	+	23.3333	34	24.3333	11.6667	35	34	33	21	19	33	8	9	18
chr1_52211208_52231653	+	23.2222	40	19.3333	10.3333	31	47	42	8	26	24	14	0	17
chr1_52289336_52299842	-	23.2222	29.6667	23	17	21	26	42	25	27	17	15	18	18
chr11_102076624_102080295	+	23.2222	32.3333	20	17.3333	25	45	27	27	33	0	24	0	28
chr11_120310838_120316173	+	23.2222	7.66667	29	33	6	13	4	40	23	24	25	48	26
chr12_104682709_104683320	+	23.2222	69.6667	0	0	70	75	64	0	0	0	0	0	0
chr15_65771218_65772737	-	23.2222	41.6667	6.33333	21.6667	40	38	47	0	19	0	23	20	22
chr15_72837161_72848248	+	23.2222	48.3333	13.3333	8	56	45	44	21	19	0	15	0	9
chr22_29090020_29091861	-	23.2222	41.6667	22.3333	5.66667	42	57	26	12	23	32	0	0	17
chr3_122942406_122978436	+	23.2222	36.6667	14	19	32	34	44	19	23	0	20	21	16
chr5_80071513_80088663	+	23.2222	40.6667	16.6667	12.3333	24	49	49	16	19	15	0	14	23
chr12_95434252_95443009	-	23.1111	38	25	6.33333	40	30	44	44	24	7	11	0	8
chr13_111274563_111279894	+	23.1111	14.6667	19	35.6667	10	15	19	0	15	42	44	34	29
chr15_66727365_66729230	+	23.1111	39.3333	12.3333	17.6667	44	44	30	20	17	0	15	17	21
chr16_67070542_67116242	+	23.1111	26.6667	28.6667	14	16	27	37	51	17	18	18	10	14
chr17_44127899_44172067	-	23.1111	31.3333	32.6667	5.33333	51	16	27	23	15	60	16	0	0
chr3_128356642_128363826	-	23.1111	22.6667	31.6667	15	34	18	16	36	59	0	12	0	33
chr6_151336016_151336829	+	23.1111	18.6667	17.3333	33.3333	16	22	18	28	24	0	32	21	47
chr7_16720926_16729531	+	23.1111	17.3333	26	26	18	27	7	19	25	34	17	21	40
chr7_1937836_1938026	-	23.1111	16.3333	42.6667	10.3333	6	15	28	33	32	63	4	21	6
chr1_10527247_10529395	-	23	19	27	23	35	0	22	14	17	50	17	26	26
chr11_85692788_85707972	-	23	19	39.6667	10.3333	12	14	31	27	33	59	15	0	16
chr11_9441958_9446809	+	23	27.6667	24.6667	16.6667	25	33	25	37	12	25	14	21	15
chr20_47570093_47580435	+	23	11.6667	30	27.3333	3	17	15	37	39	14	27	35	20
chr3_122422589_122427115	+	23	20.3333	47.6667	1	26	10	25	25	49	69	3	0	0
chr3_57832924_57843886	+	23	16	42.6667	10.3333	17	10	21	11	45	72	22	9	0
chr7_104933981_104937980	-	23	27	35.3333	6.66667	19	33	29	43	19	44	5	0	15
chr10_46158028_46159290	-	22.8889	25.6667	26.3333	16.6667	20	33	24	20	43	16	13	17	20
chr11_85961338_85967554	+	22.8889	15.6667	43.6667	9.33333	16	26	5	32	90	9	12	16	0
chr16_16146581_16150152	+	22.8889	17.6667	32.6667	18.3333	17	16	20	47	33	18	36	9	10
chr20_34243124_34246936	-	22.8889	30.6667	24.6667	13.3333	31	33	28	18	26	30	27	0	13
chr20_35668556_35675593	-	22.8889	21	32.3333	15.3333	17	29	17	31	35	31	13	15	18
chr3_37315027_37323763	+	22.8889	44.3333	10.3333	14	48	41	44	0	22	9	6	28	8
chr4_153750777_153793716	+	22.8889	21.3333	29	18.3333	17	8	39	19	17	51	19	21	15
chr7_47436397_47440511	-	22.8889	19.3333	18.3333	31	19	23	16	23	19	13	35	30	28
chr9_34286615_34290387	-	22.8889	8.33333	55	5.33333	9	6	10	60	39	66	16	0	0
chr1_200583446_200584737	-	22.7778	15.3333	33	20	15	8	23	12	46	41	31	9	20
chr14_71880665_71979562	+	22.7778	53.3333	14	1	50	54	56	0	26	16	3	0	0
chr15_75215989_75221573	-	22.7778	43	11.6667	13.6667	56	43	30	6	7	22	13	25	3
chr3_149589816_149639014	+	22.7778	24.6667	32.6667	11	30	20	24	42	15	41	11	22	0
chr4_119541569_119549381	+	22.7778	16.3333	45	7	16	10	23	64	46	25	0	0	21
chr6_35586873_35610620	-	22.7778	24	23.6667	20.6667	21	10	41	11	29	31	18	27	17
chr6_7187667_7189555	+	22.7778	35	20.6667	12.6667	64	18	23	27	6	29	27	0	11
chr1_224454706_224455835	-	22.6667	35.3333	22.6667	10	31	48	27	17	30	21	15	15	0
chr13_46090278_46093229	+	22.6667	16	44	8	13	21	14	70	39	23	10	0	14
chr14_56114743_56115588	+	22.6667	43	10.3333	14.6667	31	43	55	25	6	0	17	17	10
chr14_68151732_68157138	-	22.6667	39.6667	28.3333	0	39	25	55	22	32	31	0	0	0
chr14_74557935_74567941	+	22.6667	14.3333	46.6667	7	22	6	15	39	71	30	9	7	5
chr15_100739523_100871259	-	22.6667	0	68	0	0	0	0	50	72	82	0	0	0
chr15_65994643_65995346	-	22.6667	27.6667	14	26.3333	27	29	27	9	17	16	27	31	21
chr17_59821793_59857762	-	22.6667	33.3333	16.3333	18.3333	23	46	31	18	9	22	25	9	21
chr19_9767223_9771550	-	22.6667	38	21	9	37	43	34	15	16	32	27	0	0
chr21_40590078_40590586	-	22.6667	24.3333	32.3333	11.3333	27	18	28	22	24	51	15	0	19
chr3_194169186_194175121	-	22.6667	15.6667	23	29.3333	15	18	14	23	14	32	25	44	19
chr5_138221901_138223331	+	22.6667	35.6667	27	5.33333	42	34	31	9	33	39	6	0	10
chr5_79974746_80057497	+	22.6667	63.3333	0	4.66667	67	40	83	0	0	0	9	0	5
chr6_13639795_13644961	-	22.6667	21	40.3333	6.66667	10	27	26	34	41	46	3	11	6
chr9_131503051_131505024	-	22.6667	12	44	12	17	6	13	44	33	55	15	0	21
chr15_67528317_67529158	-	22.5556	10	41.6667	16	18	8	4	28	44	53	13	35	0
chr2_182786675_182793005	+	22.5556	1.33333	18.3333	48	4	0	0	30	2	23	37	49	58
chr3_197592294_197598333	+	22.5556	31.6667	34	2	37	22	36	21	47	34	6	0	0
chr3_32479447_32483505	+	22.5556	3.66667	49	15	4	0	7	25	56	66	8	15	22
chr3_52156395_52159197	-	22.5556	24.6667	36.3333	6.66667	23	16	35	43	35	31	14	0	6
chr4_148886175_148887990	+	22.5556	49.3333	6.33333	12	53	53	42	9	10	0	13	11	12
chrX_154645236_154649223	-	22.5556	63.6667	4	0	71	55	65	12	0	0	0	0	0
chrX_76776266_76778879	-	22.5556	28.6667	30	9	31	27	28	24	34	32	10	17	0
chr1_70766447_70781249	-	22.4444	46.3333	15	6	45	54	40	32	13	0	8	0	10
chr11_3712577_3714605	-	22.4444	18.3333	34	15	20	8	27	39	38	25	9	25	11
chr11_66254011_66255478	+	22.4444	9.66667	39.6667	18	3	17	9	27	35	57	22	21	11
chr14_24735636_24737825	-	22.4444	43	13.6667	10.6667	63	39	27	16	0	25	27	0	5
chr20_47591303_47592736	+	22.4444	19.6667	22.3333	25.3333	19	21	19	0	42	25	42	20	14
chr20_50329505_50346517	-	22.4444	15.6667	50	1.66667	28	14	5	30	73	47	5	0	0
chr3_47777524_47814426	-	22.4444	21.6667	18.3333	27.3333	24	20	21	0	14	41	35	35	12
chr4_4239554_4248070	-	22.4444	21.3333	18.6667	27.3333	22	10	32	23	0	33	32	30	20
chr6_89638704_89650899	-	22.4444	27.6667	29	10.6667	32	22	29	31	22	34	5	10	17
chr7_103777228_103805730	-	22.4444	27.3333	40	0	34	25	23	32	27	61	0	0	0
chr10_74501480_74502031	+	22.3333	67	0	0	54	62	85	0	0	0	0	0	0
chr16_16180681_16184445	+	22.3333	18	31.3333	17.6667	21	11	22	17	42	35	21	10	22
chr2_135694411_135705469	+	22.3333	51.3333	10.6667	5	59	47	48	13	19	0	8	0	7
chr7_23224689_23224917	+	22.3333	26.3333	19	21.6667	29	29	21	13	20	24	11	26	28
chr8_42780700_42798588	+	22.3333	31	27	9	43	24	26	42	16	23	14	13	0
chrX_24197300_24197887	+	22.3333	31.6667	22.3333	13	34	24	37	34	10	23	11	16	12
chr11_9430033_9438695	+	22.2222	31.6667	24	11	20	46	29	14	21	37	7	14	12
chr12_6618883_6620418	+	22.2222	20	25.3333	21.3333	24	27	9	27	22	27	28	8	28
chr13_100982815_100992513	+	22.2222	42.3333	10.6667	13.6667	34	47	46	16	16	0	16	25	0
chr16_28163980_28167848	-	22.2222	22.6667	25	19	24	20	24	0	39	36	17	33	7
chr16_53907698_53913899	+	22.2222	23.3333	25.6667	17.6667	17	24	29	11	22	44	9	20	24
chr17_44143903_44145033	-	22.2222	41	22.3333	3.33333	43	49	31	36	23	8	10	0	0
chr2_61014082_61019424	+	22.2222	18.6667	33.3333	14.6667	34	10	12	48	27	25	7	15	22
chr20_3274785_3275275	-	22.2222	13	30.6667	23	13	20	6	29	47	16	40	23	6
chr1_156169626_156170263	+	22.1111	16	30	20.3333	16	14	18	28	16	46	14	20	27
chr12_32458631_32459056	+	22.1111	24.3333	25.6667	16.3333	28	16	29	31	25	21	14	35	0
chr5_137759764_137761271	+	22.1111	22.6667	34.3333	9.33333	28	26	14	42	19	42	0	20	8
chr7_2393549_2400537	+	22.1111	0	66.3333	0	0	0	0	83	16	100	0	0	0
chr9_88571275_88577095	+	22.1111	28.6667	24	13.6667	25	34	27	26	29	17	11	10	20
chrX_107083900_107097934	+	22.1111	19.3333	47	0	35	15	8	21	40	80	0	0	0
chr1_101372408_101387397	+	22	16	36	14	17	26	5	47	15	46	15	0	27
chr1_167734820_167742605	+	22	22.6667	15.3333	28	29	18	21	0	12	34	34	28	22
chr1_36826822_36828257	-	22	20.6667	24.3333	21	20	21	21	10	38	25	17	30	16
chr10_76910272_76910864	+	22	23.3333	26.6667	16	20	25	25	9	20	51	16	18	14
chr10_98618049_98667504	+	22	32.6667	23.6667	9.66667	25	29	44	33	26	12	14	0	15
chr13_99549742_99556960	-	22	0.666667	59	6.33333	2	0	0	54	57	66	6	0	13
chr14_103336522_103342862	+	22	21	36	9	25	18	20	27	30	51	6	0	21
chr15_43102812_43109295	-	22	38.6667	25	2.33333	73	43	0	11	46	18	7	0	0
chr16_89164999_89169167	+	22	23.3333	18	24.6667	24	21	25	39	15	0	25	25	24
chr18_196637_204692	+	22	21.3333	17.3333	27.3333	14	20	30	9	17	26	17	33	32
chr2_47606092_47607108	+	22	0	43	23	0	0	0	22	19	88	35	8	26
chr2_63540383_63609229	-	22	40	16.3333	9.66667	37	48	35	3	30	16	11	6	12
chr20_35812583_35812776	+	22	21.6667	26	18.3333	16	21	28	24	35	19	10	20	25
chr5_43292576_43297268	-	22	62	1.33333	2.66667	34	83	69	0	4	0	8	0	0
chr5_87516380_87541609	-	22	34	17	15	29	39	34	13	29	9	19	16	10
chr5_95099212_95124562	+	22	60.3333	3.33333	2.33333	45	64	72	10	0	0	7	0	0
chr12_70671912_70713144	+	21.8889	38.3333	24.6667	2.66667	34	35	46	17	35	22	8	0	0
chr15_74963796_74967483	-	21.8889	15	32	18.6667	8	22	15	37	26	33	28	0	28
chr15_80390758_80415142	+	21.8889	42.3333	9.66667	13.6667	38	38	51	9	10	10	11	16	14
chr17_63739186_63746842	-	21.8889	19.3333	31	15.3333	28	20	10	32	39	22	6	15	25
[truncated: 5,089 more rows]
