# Supplementary material for: Docker4Circ: A Framework for the Reproducible Characterization of circRNAs from RNA-Seq Data
Source: Int J Mol Sci. 2019 Dec 31;21(1):293. doi: 10.3390/ijms21010293 (PMC6982331; doi:10.3390/ijms21010293)
Supplement: Supplementary file 1 [file ijms-21-00293-s001.zip › Supplementary_Table_3_All_STARChip_circRNAs_predictions.xlsx]

## Sheet: STARchip_circRNAs_predictions
ID	Overlap with CIRI2 predictions	SRR5889366_NCM460_1	SRR5889367_NCM460_2	SRR5889371_NCM460_3	SRR5889362_SW480_1	SRR5889368_SW480_2	SRR5889369_SW480_3	SRR5889363_SW620_1	SRR5889364_SW620_2	SRR5889365_SW620_3
chr10_126727566_126799662	Yes	22	28	14	32	36	25	22	13	24
chr10_126799559_126811437	Yes	49	65	45	25	43	17	14	42	15
chr10_32197100_32199491	Yes	135	122	159	484	522	625	441	288	357
chr10_5815805_5842668	Yes	59	54	57	65	82	91	84	119	54
chr10_5827105_5842668	Yes	42	55	20	76	99	81	74	101	71
chr10_5836848_5842668	Yes	29	21	38	58	34	74	47	43	53
chr10_70218861_70229920	Yes	87	87	91	21	44	17	33	1	26
chr10_70227880_70229920	Yes	151	148	160	124	120	113	128	102	185
chr10_74100547_74100928	Yes	21	12	20	55	40	6	17	28	22
chr10_89527430_89536184	Yes	21	22	34	16	14	12	65	45	15
chr11_118656761_118657227	Yes	7	16	17	25	2	6	6	28	8
chr11_128932175_128936763	Yes	18	9	13	23	57	47	41	22	21
chr11_128963516_129034322	Yes	29	20	30	61	63	100	52	58	45
chr11_128993341_128994789	Yes	8	21	9	100	79	88	28	70	18
chr11_128993341_128997200	Yes	23	16	17	43	27	21	27	9	13
chr11_128993341_129034322	Yes	60	46	31	155	191	149	103	91	81
chr11_130130751_130131824	Yes	84	76	60	188	126	100	55	58	65
chr11_13435077_13443385	Yes	26	31	17	50	96	127	56	18	54
chr11_18312989_18313566	Yes	71	81	46	34	47	38	12	16	7
chr11_46098305_46113774	Yes	90	115	93	30	55	89	33	40	20
chr11_46515158_46529920	Yes	336	278	307	34	72	131	39	13	12
chr11_46515158_46534363	Yes	197	184	149	38	88	27	14	24	11
chr11_47444125_47444524	Yes	25	23	26	57	44	45	35	1	7
chr11_62406455_62407203	Yes	30	21	27	60	29	63	71	59	75
chr11_72695133_72700142	Yes	55	62	58	33	35	10	15	32	15
chr11_73418465_73429763	Yes	19	16	27	29	6	31	11	21	11
chr11_77336008_77340944	Yes	49	16	22	17	17	8	15	19	29
chr11_77394755_77404656	Yes	48	33	25	28	25	54	36	4	18
chr11_78176922_78204241	Yes	48	17	39	39	17	10	32	15	9
chr11_85685751_85695016	Yes	71	76	73	78	49	54	39	20	42
chr11_86267595_86270865	Yes	18	45	35	36	37	22	14	16	5
chr12_109046048_109048186	Yes	89	103	105	111	191	219	51	51	26
chr12_111990084_111993723	Yes	284	284	351	99	115	108	48	35	61
chr12_116668338_116675510	Yes	80	108	160	140	130	165	22	40	34
chr12_120592774_120593523	Yes	193	151	215	207	261	335	283	246	179
chr12_12332744_12340053	Yes	9	7	17	66	36	27	62	2	34
chr12_12397196_12397589	Yes	232	191	176	90	108	176	122	127	127
chr12_129293333_129299615	Yes	14	16	20	46	7	24	19	11	23
chr12_129299320_129299615	Yes	38	25	17	26	58	29	56	33	41
chr12_27143383_27152609	Yes	5	26	5	20	10	21	5	13	31
chr12_27148170_27156323	Yes	15	8	21	8	44	10	12	10	27
chr12_27149675_27152609	Yes	5	5	21	36	27	37	48	36	29
chr12_46622936_46637097	Yes	390	486	504	449	234	333	165	180	128
chr12_46633462_46637097	Yes	318	274	367	167	267	203	205	187	191
chr12_46633462_46648719	Yes	106	102	125	10	28	10	9	27	21
chr12_49053688_49054402	Yes	64	32	57	51	66	12	59	43	23
chr12_50385781_50386438	Yes	64	59	73	90	65	85	89	61	40
chr13_113170754_113181798	Yes	124	91	84	109	67	69	204	142	222
chr13_114806476_114839312	Yes	27	24	30	30	55	50	28	55	36
chr13_20425495_20426330	Yes	12	15	20	36	25	62	8	18	17
chr13_37614542_37625720	Yes	22	10	2	9	33	2	23	4	7
chr13_41826781_41835051	Yes	17	23	34	7	13	54	10	10	13
chr13_42385361_42393522	Yes	42	41	45	76	24	44	34	24	41
chr13_42439872_42442613	Yes	129	105	99	92	189	312	154	105	98
chr13_96637493_96648389	Yes	69	84	61	23	33	51	10	5	41
chr14_104245082_104263855	Yes	56	44	37	23	112	77	2	18	27
chr14_105718844_105739231	Yes	49	33	28	58	26	11	32	7	9
chr14_21698478_21702388	Yes	51	62	59	70	86	55	37	58	50
chr14_21971316_21972024	Yes	13	12	11	17	21	5	18	9	9
chr14_23395342_23396023	Yes	17	33	7	33	3	11	17	4	14
chr14_50130033_50141145	Yes	100	154	145	32	31	42	83	63	48
chr14_80963812_80997230	Yes	155	117	146	33	72	67	10	23	16
chr14_81362062_81372425	Yes	143	158	128	116	180	219	103	68	99
chr14_99924616_99932150	Yes	618	639	654	301	329	351	308	259	321
chr15_25650608_25657118	Yes	186	176	177	122	211	205	56	68	99
chr15_25650608_25660989	Yes	17	29	21	20	9	10	17	19	14
chr15_43120126_43132631	Yes	133	134	145	47	89	87	39	7	22
chr15_50940884_50955243	Yes	56	35	55	15	17	25	23	24	17
chr15_65266940_65275931	Yes	16	4	25	20	12	4	7	32	7
chr15_67524152_67529158	Yes	198	180	207	148	193	137	174	111	114
chr15_73052748_73067438	Yes	31	24	31	26	26	45	15	38	8
chr15_75219107_75221573	Yes	32	44	33	21	26	31	31	11	33
chr15_76576098_76585041	Yes	18	20	13	16	36	11	34	24	20
chr15_76584772_76588078	Yes	21	17	17	8	9	31	45	21	19
chr15_90414707_90432372	Yes	31	23	28	18	9	5	21	23	18
chr16_1004357_1004666	Yes	89	65	66	21	62	62	224	154	110
chr16_23113640_23119504	Yes	6	18	21	6	22	35	22	12	27
chr16_3900298_3901010	Yes	16	7	9	10	34	28	16	10	8
chr16_56419831_56423287	Yes	15	18	31	35	19	34	24	38	30
chr16_69404386_69406258	Yes	21	29	7	12	34	49	62	66	48
chr16_69752026_69752437	Yes	16	28	33	26	30	16	22	27	32
chr16_87782279_87795646	Yes	28	30	9	51	30	31	87	49	19
chr16_89484692_89488713	Yes	72	56	101	19	19	30	19	28	10
chr17_1257505_1265302	Yes	37	26	31	38	44	28	20	8	22
chr17_1264386_1265302	Yes	75	84	82	48	32	80	27	31	35
chr17_20921255_20924539	Yes	32	5	7	14	22	6	17	18	12
chr17_35640168_35646430	Yes	46	51	70	21	24	16	14	7	32
chr17_4186093_4200109	Yes	115	64	88	43	32	61	36	37	25
chr17_4186093_4210418	Yes	33	39	21	20	21	9	9	29	24
chr17_43552466_43553092	Yes	55	42	55	103	66	100	64	23	34
chr17_44143903_44172067	Yes	130	99	132	86	101	152	48	33	25
chr17_47388674_47389404	Yes	36	44	47	20	13	6	30	7	11
chr17_47388674_47390207	Yes	69	60	57	151	109	109	69	23	21
chr17_49091593_49098726	Yes	25	16	25	35	38	40	7	20	29
chr17_49118862_49133843	Yes	123	104	154	76	58	88	26	25	16
chr17_59853762_59857762	Yes	87	63	76	38	36	48	40	25	36
chr17_59996761_60002460	Yes	64	50	53	29	43	55	57	25	33
chr17_59999086_60002460	Yes	19	16	13	10	16	23	6	19	10
chr17_79571574_79575848	Yes	17	25	6	8	24	28	20	4	11
chr17_79813018_79813462	Yes	14	20	23	50	19	20	49	51	4
chr18_13681604_13682104	Yes	84	52	54	109	78	111	100	65	34
chr18_45391430_45396935	Yes	65	94	59	27	16	46	13	19	3
chr19_12825635_12826553	Yes	26	22	25	16	29	15	24	24	18
chr19_13039156_13039661	Yes	16	27	26	27	12	62	41	31	45
chr19_18650181_18650530	Yes	12	14	14	4	8	25	19	4	15
chr19_19750894_19751380	Yes	54	54	14	54	26	37	43	24	44
chr19_3660964_3661999	Yes	13	6	20	1	33	40	28	29	24
chr19_55610152_55614936	Yes	22	47	22	8	12	41	55	26	26
chr19_6230581_6270770	Yes	67	70	68	46	17	14	28	2	7
chr1_10527247_10529395	Yes	22	1	12	7	3	48	13	17	14
chr1_11133991_11137005	Yes	31	17	17	8	19	16	22	6	18
chr1_115005726_115007010	Yes	90	70	112	33	32	38	10	26	23
chr1_155823067_155823597	Yes	57	52	52	67	45	26	59	37	30
chr1_176050288_176105683	Yes	24	9	22	27	31	61	23	22	18
chr1_176132005_176153828	Yes	31	20	60	5	17	11	6	9	16
chr1_180366651_180382606	Yes	35	39	15	13	18	7	13	11	15
chr1_21083659_21100103	Yes	64	88	79	27	34	17	16	18	3
chr1_227327277_227335260	Yes	22	32	42	6	38	13	11	12	14
chr1_231090079_231097049	Yes	56	39	69	25	68	39	48	23	25
chr1_247318868_247323115	Yes	437	431	429	132	152	204	229	219	226
chr1_247319708_247323115	Yes	70	112	131	126	79	96	147	138	116
chr1_247320302_247323115	Yes	316	288	295	29	72	44	136	131	141
chr1_31478700_31479949	Yes	114	122	88	36	51	37	28	5	42
chr1_32381496_32385259	Yes	72	79	114	42	39	12	20	3	13
chr1_33413823_33415375	Yes	45	23	52	38	34	42	32	5	10
chr1_42730786_42744343	Yes	76	88	65	53	28	22	65	27	40
chr1_42730786_42744455	Yes	56	43	74	15	24	17	32	15	14
chr1_42730786_42776781	Yes	50	31	22	50	36	18	18	7	22
chr1_44750507_44785416	Yes	32	37	41	14	33	14	13	3	18
chr1_44773982_44785416	Yes	86	99	129	3	14	22	30	45	18
chr1_44773982_44804994	Yes	54	45	56	34	42	49	59	24	31
chr1_51005264_51061888	Yes	24	22	13	11	44	14	30	43	24
chr1_51032749_51061888	Yes	49	56	49	41	14	41	47	30	33
chr1_51121114_51210447	Yes	8	18	5	8	8	26	6	24	3
chr1_51868107_51874004	Yes	39	57	99	46	78	77	16	20	38
chr1_52959283_52975384	Yes	133	112	179	60	36	22	31	52	49
chr1_8555123_8617582	Yes	37	41	33	10	30	36	27	10	10
chr1_8601273_8617582	Yes	43	70	43	44	25	53	34	6	17
chr1_8601273_8674745	Yes	40	33	62	26	30	16	51	57	44
chr1_91382197_91383711	Yes	209	226	246	32	67	20	55	41	76
chr1_94032836_94033408	Yes	134	174	105	107	150	130	18	4	11
chr1_9991949_9994918	Yes	54	56	31	26	55	30	40	68	23
chr20_33954360_33971936	Yes	23	41	26	59	55	77	47	17	43
chr20_33954360_33981999	Yes	18	15	12	22	10	7	19	6	12
chr20_34302107_34313077	Yes	37	56	38	54	38	41	11	47	31
chr20_34304662_34313077	Yes	37	54	19	61	73	75	19	30	7
chr20_34309662_34313077	Yes	8	17	14	15	14	6	18	12	26
chr20_34312492_34313077	Yes	7	16	16	27	9	57	13	33	23
chr20_56846419_56847931	Yes	19	17	35	34	29	26	5	5	22
chr20_60714131_60716000	Yes	67	38	46	27	53	41	25	16	9
chr20_62407031_62422143	Yes	72	62	52	963	852	828	121	92	59
chr20_62421174_62422143	Yes	13	28	8	180	201	261	36	30	23
chr21_16386665_16415895	Yes	187	146	172	36	57	96	10	8	23
chr21_46275125_46281186	Yes	44	23	43	57	59	43	14	30	9
chr22_25771780_25777545	Yes	71	52	64	1	29	15	257	133	132
chr2_101666863_101676001	Yes	36	31	28	50	35	16	9	23	7
chr2_122260743_122287901	Yes	72	50	50	102	67	89	22	53	27
chr2_122363277_122363756	Yes	51	49	51	78	37	54	27	27	34
chr2_136620177_136622733	Yes	52	40	40	75	100	97	35	27	43
chr2_148730308_148733544	Yes	80	58	61	9	4	35	10	32	21
chr2_148730308_148739650	Yes	98	51	69	49	44	65	8	15	18
chr2_168920010_168931741	Yes	15	30	14	35	12	43	13	14	4
chr2_169018297_169038600	Yes	43	96	42	66	46	37	26	20	9
chr2_172193963_172196064	Yes	3	15	26	9	31	37	4	25	26
chr2_175779786_175816930	Yes	24	32	22	30	2	55	12	12	8
chr2_197777606_197787849	Yes	16	23	22	4	20	23	10	8	13
chr2_206992521_206994966	Yes	41	49	47	64	30	37	28	28	13
chr2_225400245_225422573	Yes	179	192	197	53	159	86	54	27	41
chr2_239090706_239093928	Yes	38	57	41	16	34	7	69	20	83
chr2_239184384_239186596	Yes	8	14	41	2	10	33	16	20	9
chr2_240929491_240946787	Yes	34	53	36	30	25	61	39	29	33
chr2_242028603_242033847	Yes	20	11	45	14	17	6	9	20	11
chr2_32108455_32157204	Yes	16	17	23	18	4	13	12	11	13
chr2_32142995_32157204	Yes	316	315	256	219	133	240	149	178	105
chr2_32142995_32168452	Yes	47	65	83	34	18	1	39	32	30
chr2_38812786_38818790	Yes	43	40	31	41	50	72	10	17	7
chr2_45773871_45789895	Yes	28	22	52	46	20	29	12	23	12
chr2_55209651_55214834	Yes	296	255	285	144	233	153	137	56	73
chr2_58449077_58459247	Yes	179	176	177	67	54	62	162	158	161
chr2_61505300_61508377	Yes	53	49	39	80	91	62	35	28	59
chr2_61709515_61717911	Yes	26	9	33	11	41	17	28	19	6
chr2_61712903_61717911	Yes	45	36	47	75	63	78	25	55	48
chr2_61722590_61726048	Yes	8	14	24	23	26	50	7	34	10
chr2_61749746_61753656	Yes	29	25	37	39	64	42	21	13	3
chr2_61749746_61761038	Yes	496	523	618	333	207	356	290	223	158
chr2_63660879_63667005	Yes	63	46	94	33	53	29	27	15	11
chr2_72945232_72960247	Yes	752	692	710	183	221	320	82	50	72
chr3_101389974_101391057	Yes	28	32	43	33	47	37	29	35	10
chr3_113207792_113225452	Yes	51	55	44	25	19	77	32	5	43
chr3_133894453_133914026	Yes	27	23	26	49	44	23	12	16	14
chr3_138289160_138291774	Yes	146	160	134	151	143	137	41	40	40
chr3_138400809_138403645	Yes	22	36	14	14	49	28	23	23	34
chr3_138407717_138413749	Yes	15	28	15	7	5	34	3	31	6
chr3_196118684_196129890	Yes	278	312	462	172	187	257	25	81	66
chr3_196807922_196846401	Yes	18	29	15	107	118	118	6	11	23
chr3_196812451_196846401	Yes	19	1	37	81	120	156	24	23	21
chr3_196817783_196846401	Yes	19	16	25	151	201	128	23	23	30
chr3_196831774_196846401	Yes	618	620	515	1263	1280	1364	208	297	231
chr3_196842798_196846401	Yes	167	162	132	171	175	246	37	57	44
chr3_31917925_31921322	Yes	159	174	152	120	41	121	22	35	38
chr3_33725851_33738425	Yes	90	97	57	30	42	42	36	29	58
chr3_3819409_3830758	Yes	14	5	12	27	32	22	25	22	22
chr3_47466975_47470160	Yes	26	5	20	24	29	42	24	29	19
chr3_47747899_47755980	Yes	10	9	23	13	11	15	13	14	22
chr3_47770515_47814426	Yes	25	12	21	57	23	41	23	32	9
chr3_48215774_48219478	Yes	32	36	30	33	39	74	24	32	17
chr3_48726971_48728915	Yes	19	27	30	6	17	30	13	5	15
chr3_52946554_52950230	Yes	23	34	39	22	15	46	52	10	16
chr3_52960047_52962357	Yes	22	19	6	4	16	43	18	25	3
chr3_56661065_56662642	Yes	26	17	21	60	15	49	28	32	31
chr3_67546222_67559327	Yes	271	310	254	137	157	109	41	38	41
chr4_103225474_103236987	Yes	229	235	230	70	82	78	42	5	14
chr4_1219148_1235307	Yes	129	111	148	178	112	231	143	102	88
chr4_1221987_1235307	Yes	69	89	75	21	7	5	28	58	32
chr4_129913322_129925031	Yes	128	148	110	138	103	165	10	38	50
chr4_151509200_151520283	Yes	20	21	18	15	26	27	10	25	4
chr4_151656410_151729550	Yes	19	33	9	27	47	65	18	20	17
chr4_151682935_151729550	Yes	72	57	62	78	76	60	58	37	49
chr4_17963526_17974508	Yes	88	65	66	33	36	61	15	31	21
chr4_25848916_25849486	Yes	33	32	38	3	23	32	27	12	12
chr4_48686690_48712715	Yes	37	43	43	25	7	12	25	15	24
chr4_78694235_78697546	Yes	101	78	73	32	48	89	21	20	9
chr4_83799883_83803090	Yes	13	15	15	12	9	38	8	43	11
chr4_88116476_88116842	Yes	210	185	172	42	32	1	55	46	58
chr5_107684100_107703654	Yes	40	38	25	26	21	38	14	12	7
chr5_133493398_133509713	Yes	68	68	40	22	27	38	10	29	1
chr5_133534777_133541822	Yes	69	81	83	50	32	35	25	8	6
chr5_137320946_137324004	Yes	765	580	694	397	323	419	176	178	185
chr5_176370336_176385155	Yes	128	126	123	114	131	199	70	35	47
chr5_179688684_179707608	Yes	130	126	154	12	41	11	6	17	23
chr5_32135678_32143986	Yes	182	213	166	33	39	37	20	14	14
chr5_38991051_39003724	Yes	202	206	227	19	7	31	35	15	13
chr5_74109665_74137504	Yes	25	15	18	42	8	25	33	4	8
chr5_74130251_74137504	Yes	10	14	10	16	11	15	8	13	21
chr5_77805607_77806221	Yes	44	54	59	32	34	7	89	28	50
chr5_78734833_78752841	Yes	25	35	40	34	54	64	59	24	39
chr6_108243001_108250718	Yes	44	66	41	23	33	25	11	10	11
chr6_128643184_128643455	Yes	72	58	74	25	31	18	34	22	27
chr6_139264650_139265759	Yes	19	28	11	33	14	10	22	28	17
chr6_170846322_170858201	Yes	25	12	14	23	6	14	24	25	13
chr6_170852689_170858201	Yes	22	58	15	38	31	44	20	29	27
chr6_34574332_34574681	Yes	301	337	286	40	84	182	39	42	27
chr6_35586873_35610620	Yes	17	2	18	8	16	10	8	20	8
chr6_79752560_79770535	Yes	143	124	108	90	64	65	56	26	58
chr6_84108086_84117620	Yes	37	35	43	6	5	28	13	11	38
chr6_89554076_89563483	Yes	18	6	11	37	22	58	14	25	18
chr6_89554076_89601634	Yes	22	11	27	6	13	32	12	19	17
chr7_100410369_100410830	Yes	73	21	19	66	116	73	11	8	21
chr7_128655033_128658211	Yes	508	500	588	269	337	332	218	126	187
chr7_129679304_129688984	Yes	19	27	14	44	25	125	35	13	24
chr7_140055468_140058585	Yes	101	74	63	6	35	31	12	34	21
chr7_148543562_148544397	Yes	63	92	57	46	74	122	30	48	29
chr7_152007051_152012423	Yes	281	284	307	78	99	160	78	35	38
chr7_156549087_156619438	Yes	90	66	99	56	60	160	25	12	35
chr7_156619299_156629579	Yes	162	142	136	218	159	167	63	69	62
chr7_158552177_158557544	Yes	133	115	115	443	446	372	67	72	84
chr7_158580695_158591763	Yes	165	139	171	188	112	94	65	42	47
chr7_16298015_16317851	Yes	17	16	2	18	3	28	8	10	19
chr7_17885218_17890587	Yes	17	39	22	14	19	13	27	26	15
chr7_17908030_17937069	Yes	59	66	67	49	1	19	32	41	21
chr7_1937836_1976533	Yes	27	23	33	100	95	62	42	53	31
chr7_2269619_2270362	Yes	108	77	84	64	110	156	79	63	71
chr7_2269619_2270399	Yes	13	11	17	49	21	23	20	3	15
chr7_26883649_26894509	Yes	5	11	21	9	29	27	7	14	20
chr7_27668990_27672064	Yes	106	90	94	11	23	2	35	19	34
chr7_27668990_27689252	Yes	162	105	109	138	88	115	70	39	61
chr7_30590252_30601744	Yes	23	12	15	25	7	37	10	14	7
chr7_43679048_43680248	Yes	107	108	76	58	139	197	56	89	77
chr7_47474880_47481653	Yes	13	10	10	6	29	20	59	23	31
chr7_6472468_6476164	Yes	43	53	32	22	51	2	26	6	14
chr7_716866_751164	Yes	255	235	194	1161	1279	1206	524	365	400
chr8_103372299_103373854	Yes	8	15	15	20	18	14	11	10	25
chr8_117668095_117671219	Yes	75	87	53	49	36	22	69	62	25
chr8_124346118_124348772	Yes	15	22	22	6	29	32	17	32	7
chr8_124349865_124351686	Yes	17	16	25	25	25	39	47	54	41
chr8_141357856_141370292	Yes	26	7	33	82	119	88	75	48	22
chr8_141710990_141716304	Yes	28	29	35	5	13	33	38	49	27
chr8_141749117_141762415	Yes	94	86	109	9	26	10	37	22	47
chr8_141828376_141900868	Yes	66	69	68	12	36	15	13	11	14
chr8_141856359_141900868	Yes	208	158	167	37	51	31	60	35	39
chr8_141874411_141900868	Yes	192	204	260	45	42	25	23	32	41
chr8_18622959_18662408	Yes	166	179	152	88	103	132	29	34	61
chr8_18656805_18662408	Yes	50	50	77	38	41	69	36	59	17
chr8_52773405_52773806	Yes	78	69	62	24	24	26	33	22	10
chr8_71126138_71128999	Yes	97	57	83	25	18	5	4	24	16
chr8_74585342_74601048	Yes	57	47	58	41	25	20	34	46	16
chr8_99718695_99719539	Yes	495	460	486	133	166	176	148	179	151
chr9_102814699_102822454	Yes	31	20	28	13	17	25	14	18	15
chr9_114148657_114154104	Yes	157	133	138	254	292	245	153	189	202
chr9_128419930_128434922	Yes	67	71	129	63	31	80	36	40	29
chr9_136277419_136278041	Yes	24	15	26	29	72	17	46	10	23
chr9_138773479_138774924	Yes	411	355	335	353	491	390	399	201	217
chr9_33953283_33963789	Yes	116	71	137	204	194	389	141	105	119
chr9_33953283_33973235	Yes	13	18	31	80	40	56	27	36	29
chr9_77631184_77632364	Yes	62	23	51	10	46	23	33	16	18
chr9_86292642_86293514	Yes	110	132	114	52	60	31	49	13	33
chr9_86297866_86301070	Yes	47	73	69	27	30	38	28	18	25
chr9_88920107_88924932	Yes	50	80	57	32	52	47	33	3	25
chr9_95018962_95032265	Yes	47	57	39	78	80	66	55	35	73
chrX_14868627_14877456	Yes	22	19	13	50	44	20	23	9	7
chrX_2184781_2209644	Yes	45	28	47	19	12	29	38	5	21
chrX_23739998_23754133	Yes	42	38	41	33	29	51	17	9	16
chrX_322140_323067	Yes	85	92	121	22	38	5	17	1	15
chrX_46510545_46513140	Yes	24	25	54	16	13	13	44	11	39
chrX_53627078_53631795	Yes	19	19	2	27	30	30	22	18	12
chrX_53641495_53642796	Yes	17	30	20	9	27	62	18	5	17
chrX_53672263_53681075	Yes	638	638	691	362	358	360	202	156	143
chrX_67266836_67273652	Yes	58	58	56	14	46	34	14	12	18
chrX_71681854_71684581	Yes	91	68	48	4	50	18	8	13	12
chr11_18312989_18314523	Yes	106	105	138	0	65	99	29	102	33
chr11_3794862_3797251	Yes	11	18	13	27	21	0	23	17	11
chr12_6859014_6859932	Yes	20	7	21	27	17	0	19	5	18
chr13_33091994_33101669	Yes	291	204	248	155	0	143	52	41	55
chr15_42553156_42560230	Yes	40	41	29	0	12	56	10	19	33
chr15_76566753_76585041	Yes	37	44	16	27	8	0	27	10	13
chr15_76580187_76585041	Yes	25	5	29	11	18	18	36	0	15
chr17_44248221_44249598	Yes	13	10	20	42	64	59	11	0	25
chr18_45391430_45423180	Yes	30	18	23	0	6	26	12	13	7
chr19_11623871_11625036	Yes	23	34	7	0	5	26	14	7	13
chr1_233353645_233372726	Yes	23	19	4	26	23	0	22	15	8
chr1_31465237_31468067	Yes	31	19	34	16	25	0	7	23	23
chr22_28290543_28293880	Yes	8	15	16	34	6	0	12	12	16
chr5_31448654_31451747	Yes	43	46	27	21	24	0	52	22	26
chr5_38991051_39021238	Yes	119	105	92	17	20	0	30	33	36
chr6_79770195_79770535	Yes	34	22	13	16	17	0	17	10	7
chr6_82920531_82922510	Yes	8	14	14	21	0	28	6	23	9
chr7_151960101_151962294	Yes	8	10	16	17	26	0	13	14	11
chr9_138741983_138758382	Yes	11	4	18	34	4	0	9	3	29
chr9_138905045_138908275	Yes	58	74	50	9	22	9	18	0	20
chrX_76812922_76814317	Yes	11	41	16	18	0	25	10	26	17
chr10_120488807_120489922	Yes	24	31	20	13	32	7	4	11	5
chr10_46158990_46159290	Yes	22	8	10	4	19	20	1	7	16
chr10_69748420_69773943	Yes	16	24	14	12	8	15	11	5	2
chr10_909683_931700	Yes	22	18	4	8	32	4	9	1	19
chr10_94291505_94297307	Yes	27	23	24	2	7	14	12	5	14
chr11_107200644_107224462	Yes	13	25	8	8	21	5	10	15	1
chr11_14316017_14317401	Yes	35	28	16	14	22	11	12	5	7
chr11_18010144_18029623	Yes	11	7	1	22	20	23	26	30	38
chr11_28080473_28084063	Yes	16	18	16	20	31	7	6	3	1
chr11_68571468_68575106	Yes	4	5	2	25	13	3	26	10	2
chr11_77330651_77340944	Yes	28	25	20	2	5	8	7	13	17
chr12_105321751_105322472	Yes	14	21	20	2	11	30	9	9	4
chr12_112757029_112757546	Yes	34	18	28	1	14	29	11	9	1
chr12_116668238_116675510	Yes	9	5	4	24	34	39	16	21	7
chr12_116674626_116675510	Yes	20	14	12	91	68	114	4	7	14
chr12_120260624_120272032	Yes	18	5	8	9	10	33	2	5	3
chr12_121220458_121222396	Yes	80	110	119	28	22	25	16	3	2
chr12_46622936_46648719	Yes	69	55	54	33	2	24	5	11	5
chr12_48477374_48491907	Yes	30	25	24	15	17	19	7	1	21
chr12_96717726_96728643	Yes	19	26	44	26	29	14	6	15	5
chr13_21955573_21965993	Yes	9	6	9	28	6	54	5	9	22
chr13_96636058_96651561	Yes	10	14	22	10	9	6	14	13	11
chr14_21825356_21829372	Yes	10	18	4	7	1	37	10	8	1
chr14_35331250_35331528	Yes	37	37	26	6	5	19	16	19	12
chr14_51107468_51111732	Yes	44	55	52	14	15	40	9	10	9
chr14_78043110_78045452	Yes	11	15	20	8	31	4	5	11	3
chr15_44907561_44912601	Yes	14	16	19	16	3	35	4	10	7
chr15_65994643_65995346	Yes	21	14	15	1	9	16	17	17	9
chr15_72300167_72320134	Yes	17	19	26	28	26	32	7	2	12
chr15_73052748_73072663	Yes	5	9	18	12	20	29	8	3	7
chr15_74963796_74967483	Yes	3	17	3	17	6	10	20	3	8
chr15_85223944_85234875	Yes	23	21	12	25	24	25	3	4	16
chr16_15973661_15978062	Yes	70	101	81	25	6	11	3	9	7
chr16_28112779_28113266	Yes	64	23	64	9	9	10	59	31	29
chr16_72845476_72845937	Yes	10	25	18	8	17	11	16	4	5
chr16_960931_1004666	Yes	17	8	1	42	26	52	65	13	35
chr17_38562636_38563194	Yes	34	21	21	15	20	43	15	11	4
chr17_44159807_44172067	Yes	39	61	48	57	63	76	11	1	13
chr17_58538024_58539422	Yes	7	23	8	8	10	23	5	9	4
chr17_60061532_60062451	Yes	8	10	11	16	17	34	18	7	32
chr17_60106902_60112969	Yes	16	19	35	24	13	13	10	14	6
chr17_60111148_60112969	Yes	28	36	25	18	13	5	10	1	10
chr17_62817885_62818511	Yes	10	9	6	15	80	127	48	7	25
chr17_64171162_64179425	Yes	16	21	3	34	13	10	2	11	3
chr17_67270084_67280213	Yes	32	3	39	17	15	36	3	12	8
chr17_722679_729318	Yes	16	16	24	113	130	47	3	7	12
chr17_79254409_79258695	Yes	6	8	9	21	16	10	36	23	4
chr17_8141349_8141947	Yes	3	9	7	8	20	3	7	21	8
chr18_13666478_13682104	Yes	8	22	11	13	35	46	6	5	5
chr19_18648411_18649246	Yes	10	6	14	31	28	11	16	16	12
chr1_108724563_108728576	Yes	13	9	17	19	7	16	8	5	5
chr1_12638746_12639440	Yes	151	124	109	76	98	128	5	9	10
chr1_180953813_180962561	Yes	21	12	10	2	27	31	3	7	8
chr1_21091870_21100103	Yes	35	28	37	4	31	23	3	3	5
chr1_231079552_231097049	Yes	8	21	12	35	5	11	7	5	1
chr1_41578955_41608784	Yes	46	39	52	26	31	63	5	10	3
chr1_45553553_45553909	Yes	28	17	14	8	6	15	14	16	11
chr1_47761437_47767420	Yes	33	31	22	1	10	26	9	8	5
chr1_51926763_51930998	Yes	19	19	15	9	19	8	9	3	3
chr1_58971732_59002413	Yes	30	9	33	12	16	13	6	14	7
chr1_78098800_78107340	Yes	19	22	36	2	16	12	12	32	2
chr1_9991949_9995685	Yes	4	11	6	30	9	31	24	29	11
chr20_33632308_33645374	Yes	3	8	12	31	23	36	14	14	19
chr21_36206707_36231875	Yes	3	13	5	20	6	9	22	25	18
chr21_38610761_38612940	Yes	4	15	6	14	16	1	13	7	12
chr22_38890635_38897285	Yes	7	4	9	14	8	23	8	21	9
chr2_110321943_110350696	Yes	6	22	32	6	24	41	3	11	5
chr2_170401231_170413807	Yes	2	18	8	7	29	15	41	36	11
chr2_197755552_197763093	Yes	2	9	15	7	1	24	11	15	12
chr2_208841375_208842310	Yes	14	9	13	30	16	27	3	7	5
chr2_224862832_224866639	Yes	20	10	12	14	19	49	11	3	3
chr2_43725972_43755127	Yes	12	8	8	64	45	24	35	31	8
chr2_61710092_61717911	Yes	29	31	11	69	55	20	14	3	3
chr2_69565030_69565697	Yes	16	20	35	14	26	25	3	16	10
chr3_138289160_138291826	Yes	217	195	216	18	58	120	16	5	8
chr3_185638892_185641772	Yes	7	14	14	36	16	13	3	10	13
chr3_195022304_195022903	Yes	18	13	16	15	6	13	6	5	8
chr3_195101738_195112876	Yes	46	38	37	21	22	27	6	5	7
chr3_196812451_196842954	Yes	9	27	5	43	32	96	7	14	4
chr3_52946554_52947633	Yes	10	12	9	8	7	12	14	6	18
chr3_72881520_72893574	Yes	60	54	49	37	29	41	5	2	7
chr3_98568305_98600611	Yes	7	6	6	336	408	471	147	87	95
chr4_103225474_103236899	Yes	10	14	7	13	29	12	7	4	11
chr4_146767108_146770713	Yes	11	9	13	42	62	18	13	12	4
chr4_170076631_170077830	Yes	8	22	13	23	26	16	4	11	9
chr4_25128886_25160729	Yes	9	17	12	2	22	23	3	1	12
chr4_39900009_39904080	Yes	4	9	5	21	12	24	41	30	25
chr4_83793097_83796975	Yes	16	33	22	6	5	18	15	5	15
chr5_137342679_137356886	Yes	24	10	20	20	14	6	3	9	9
chr5_140961879_140963182	Yes	8	3	6	15	18	26	12	16	3
chr5_153413351_153414527	Yes	4	24	15	35	21	17	9	7	8
chr5_176370336_176378578	Yes	21	8	12	21	33	42	4	7	6
chr6_1960101_1961200	Yes	7	4	9	29	5	13	10	16	19
chr6_42941741_42942776	Yes	7	8	9	22	6	5	22	20	6
chr7_105103068_105108910	Yes	5	6	16	3	18	43	11	18	10
chr7_107002478_107013205	Yes	10	14	13	19	13	19	1	5	5
chr7_156549087_156556489	Yes	40	5	25	20	28	16	5	1	19
chr7_158528194_158531812	Yes	20	15	28	13	10	7	11	7	15
chr7_158566032_158591763	Yes	69	52	56	56	30	49	19	3	8
chr7_17908030_17915413	Yes	11	21	20	21	12	6	6	14	6
chr7_35707044_35712888	Yes	6	8	7	24	4	14	1	27	12
chr8_71071740_71075089	Yes	67	25	47	27	34	58	8	15	2
chr9_111868788_111870850	Yes	15	20	18	25	33	43	12	11	2
chr9_138741983_138774924	Yes	2	6	6	20	43	70	29	18	10
chr9_139115853_139118720	Yes	3	10	6	15	16	15	16	43	25
chr9_86294690_86301070	Yes	20	27	41	14	8	51	17	1	8
chrX_20181082_20185865	Yes	5	12	10	9	14	11	9	13	10
chrX_299339_308428	Yes	7	9	9	13	23	15	7	19	18
chrX_75367088_75368291	Yes	13	8	4	5	5	29	19	9	11
chr10_909683_910210	Yes	8	21	7	3	15	0	11	14	14
chr11_128963516_128994789	Yes	13	3	20	58	1	39	7	0	3
chr11_72578910_72600990	Yes	27	32	25	10	29	11	19	0	5
chr11_73418465_73431944	Yes	55	63	76	19	50	79	5	11	0
chr12_112371690_112381173	Yes	45	41	43	23	17	16	3	0	9
chr12_116534474_116549317	Yes	29	28	32	62	48	39	14	5	0
chr13_52992127_53001354	Yes	5	0	4	16	28	18	8	16	10
chr14_69583083_69589077	Yes	68	20	54	43	56	50	18	3	0
chr14_92559596_92563182	Yes	23	15	17	6	5	20	3	0	3
chr14_99723808_99724176	Yes	0	3	8	8	5	22	79	50	23
chr15_101775287_101775782	Yes	41	43	29	50	37	31	5	0	11
chr15_35207239_35219339	Yes	37	24	35	9	6	0	26	7	10
chr15_43164809_43170882	Yes	15	16	26	8	10	0	4	33	2
chr15_76566753_76588078	Yes	20	36	50	23	5	0	21	61	7
chr15_78337242_78346529	Yes	34	35	17	16	23	6	8	0	5
chr15_85230856_85234875	Yes	21	23	18	24	0	13	2	4	6
chr16_11873022_11876244	Yes	23	27	12	32	9	18	6	0	19
chr16_23632683_23634451	Yes	8	8	30	6	7	0	14	20	20
chr16_28163980_28167848	Yes	8	9	15	13	9	25	14	9	0
chr16_9014216_9024254	Yes	24	13	14	4	4	0	12	16	14
chr17_28011581_28030080	Yes	45	44	44	17	5	11	15	0	8
chr17_44127899_44172067	Yes	40	11	14	18	4	37	4	0	3
chr17_44143903_44145033	Yes	25	14	17	29	12	6	6	7	0
chr17_58342773_58348842	Yes	26	13	10	20	14	35	4	3	0
chr17_67270100_67280213	Yes	22	48	46	2	20	41	4	6	0
chr18_19144164_19148055	Yes	31	28	37	21	4	18	8	11	0
chr19_1147308_1154401	Yes	43	46	29	4	15	14	6	8	0
chr19_40761065_40771258	Yes	34	9	25	0	4	4	25	13	14
chr1_118454616_118461358	Yes	8	10	13	24	3	36	10	9	0
chr1_173961893_173962273	Yes	10	13	13	6	3	10	15	0	20
chr1_179100446_179102509	Yes	22	35	35	20	0	13	5	11	8
chr1_21076216_21100103	Yes	49	37	44	13	1	23	8	0	9
chr1_21097423_21100103	Yes	37	56	31	0	27	18	4	13	10
chr1_21220010_21221994	Yes	19	18	23	5	14	14	4	0	5
chr1_44750507_44804994	Yes	20	25	15	0	17	8	14	28	15
chr1_94360170_94367225	Yes	53	60	60	70	37	66	7	0	8
chr20_7976673_7990962	Yes	14	11	13	22	19	43	6	0	3
chr21_32537279_32567621	Yes	20	17	12	60	66	85	7	0	10
chr21_32554738_32567621	Yes	22	23	27	39	75	111	9	7	0
chr22_22153301_22162135	Yes	19	2	10	12	2	20	8	3	0
chr2_105912813_105915162	Yes	11	8	14	20	30	5	3	0	5
chr2_110342703_110350696	Yes	43	32	22	17	26	35	11	0	8
chr2_169018297_169023917	Yes	35	10	20	0	28	6	9	5	8
chr2_215632206_215646233	Yes	45	55	40	45	25	33	7	0	16
chr2_240078348_240085619	Yes	17	5	11	3	7	0	39	34	12
chr2_32117061_32157204	Yes	27	5	22	2	7	9	17	0	30
chr2_53941521_53943880	Yes	37	28	59	39	10	33	14	0	3
chr2_72692289_72707879	Yes	22	19	43	17	7	13	12	8	0
chr2_9048751_9098771	Yes	26	32	27	10	5	0	17	18	3
chr3_113207792_113218429	Yes	15	12	8	6	6	8	13	23	0
chr3_119624602_119635021	Yes	14	13	11	19	11	33	7	0	3
chr3_124560230_124592378	Yes	16	18	4	8	24	64	0	3	3
chr3_136183723_136221621	Yes	11	28	21	49	25	35	5	0	18
chr3_169854207_169867032	Yes	80	72	49	27	21	33	7	0	13
chr3_33661095_33686395	Yes	11	18	21	20	5	15	8	9	0
chr3_33725851_33731424	Yes	48	94	74	26	29	20	7	0	14
chr3_41746549_41759353	Yes	15	15	13	11	36	12	7	0	10
chr3_47079156_47088111	Yes	26	44	32	8	5	23	8	0	4
chr3_47762156_47787483	Yes	16	18	12	9	0	3	24	10	21
chr3_52952500_52962357	Yes	5	9	8	25	14	0	8	15	12
chr4_10099335_10105610	Yes	4	3	0	31	7	12	12	22	14
chr4_103635595_103647840	Yes	26	56	27	25	40	39	3	4	0
chr4_1231971_1235307	Yes	27	30	18	10	12	10	8	0	16
chr4_151719233_151738409	Yes	40	13	13	4	24	21	10	3	0
chr4_170501993_170511960	Yes	7	17	13	3	20	34	12	0	6
chr4_40892381_40895428	Yes	15	17	20	0	14	10	18	8	19
chr4_7870349_7873807	Yes	96	101	96	19	24	45	16	0	14
chr4_83795764_83803093	Yes	15	17	5	11	0	29	5	6	4
chr5_133494146_133509713	Yes	24	6	5	10	4	29	4	0	4
chr5_179675973_179707608	Yes	16	20	22	5	20	30	5	0	6
chr5_74041503_74046492	Yes	8	20	10	11	15	0	10	10	18
chr5_76745585_76785397	Yes	44	34	25	12	9	29	12	0	4
chr6_17665470_17669777	Yes	31	34	29	19	8	4	12	0	12
chr6_83728692_83754378	Yes	29	19	29	32	15	39	10	0	7
chr6_86267694_86284096	Yes	14	12	23	20	30	44	8	4	0
chr7_103828699_103844682	Yes	38	21	18	20	9	8	4	0	4
chr7_156589083_156619438	Yes	21	27	19	14	12	32	4	20	0
chr7_64004085_64004810	Yes	8	0	10	10	13	28	12	16	8
chr8_141889570_141900868	Yes	203	203	183	27	31	34	16	9	0
chr8_54682178_54684727	Yes	17	10	17	28	11	5	7	14	0
chr8_59535779_59548105	Yes	23	27	21	32	38	31	10	0	15
chr9_111812563_111812972	Yes	3	9	0	21	2	10	4	32	21
chr9_115013209_115060196	Yes	13	6	12	34	7	0	9	1	6
chr9_80409379_80430686	Yes	8	26	35	7	16	24	5	12	0
chr9_88233898_88248289	Yes	114	118	117	52	66	66	0	5	9
chr9_98002931_98011651	Yes	75	81	76	11	38	0	1	6	10
chr9_99154680_99160596	Yes	8	11	22	23	5	11	7	0	4
chrX_299339_302666	Yes	22	5	7	5	19	14	3	0	6
chrX_306251_308428	Yes	21	10	10	36	8	11	10	0	3
chrX_44383248_44386611	Yes	22	35	49	27	6	0	5	9	10
chrX_76776266_76778879	Yes	14	18	17	10	15	32	9	6	0
chr10_79613112_79614128	Yes	12	0	20	13	15	41	15	8	0
chr12_27075549_27081838	Yes	19	26	23	31	0	11	6	0	14
chr14_23395342_23396869	Yes	11	35	14	8	29	0	12	0	11
chr18_46858234_46906128	Yes	15	8	8	29	0	5	7	0	19
chr1_70766447_70781249	Yes	22	47	18	31	7	0	3	0	5
chr3_119624602_119642330	Yes	19	4	13	8	41	0	4	0	6
chr5_137288317_137290065	Yes	50	36	25	0	13	36	9	0	7
chr7_152027686_152055760	Yes	14	20	14	7	30	0	6	0	9
chrX_16685637_16696573	Yes	1	16	15	10	0	25	0	5	13
chr1_16464348_16464925	Yes	6	0	5	33	13	0	11	25	0
chr10_25226113_25231365	Yes	12	9	4	15	3	6	11	9	20
chr11_107673727_107677602	Yes	12	6	16	2	9	13	2	10	11
chr11_18305342_18307006	Yes	9	7	6	4	14	14	8	8	9
chr11_47837031_47841010	Yes	3	5	9	9	7	24	9	6	12
chr11_65661485_65664477	Yes	6	4	1	70	24	43	7	13	9
chr11_72598515_72600990	Yes	3	9	4	21	22	10	5	2	6
chr11_73418465_73429935	Yes	10	29	15	1	18	4	1	6	9
chr11_85692172_85693046	Yes	3	4	5	3	6	10	8	14	10
chr11_9308002_9321248	Yes	20	10	14	15	5	4	1	7	5
chr11_94178976_94180604	Yes	8	10	12	21	9	18	6	4	5
chr13_28155434_28155940	Yes	9	3	3	11	40	9	4	9	10
chr13_30854200_30857928	Yes	14	4	3	11	53	39	9	7	1
chr13_95858786_95863035	Yes	5	1	14	10	5	16	13	5	11
chr14_89192885_89212627	Yes	6	1	7	7	6	19	2	7	12
chr15_73064124_73067438	Yes	11	5	11	14	13	8	4	2	3
chr15_75815462_75819602	Yes	23	16	10	5	5	15	11	1	3
chr17_20921255_20931987	Yes	10	2	12	14	21	10	14	13	3
chr17_42501717_42513913	Yes	7	10	7	6	20	6	6	14	7
chr17_57128575_57134415	Yes	11	5	6	13	15	16	5	3	5
chr18_46889531_46906128	Yes	10	27	20	6	9	10	8	4	1
chr1_1192372_1192690	Yes	3	5	4	27	8	7	17	5	3
chr1_145592633_145595220	Yes	5	3	2	4	10	8	16	10	6
chr1_150202906_150204264	Yes	8	7	11	2	10	4	2	24	5
chr1_159888553_159890327	Yes	2	9	3	9	24	29	5	5	8
chr1_36213508_36214205	Yes	12	13	4	11	8	27	5	9	9
chr1_44785300_44804994	Yes	15	12	11	9	3	7	6	5	6
chr20_33961987_33971936	Yes	13	1	11	9	19	16	5	10	14
chr20_35668556_35675593	Yes	5	9	4	10	16	8	6	5	9
chr20_48256215_48257202	Yes	2	3	7	14	11	9	5	9	13
chr20_54956489_54961589	Yes	18	11	8	14	5	7	6	8	8
chr21_32554738_32575328	Yes	9	11	7	17	44	25	17	6	1
chr22_50169239_50171461	Yes	11	5	10	5	14	10	15	12	9
chr2_15415608_15417225	Yes	9	1	11	13	9	11	14	7	4
chr2_174987908_175006728	Yes	16	7	26	8	1	17	5	1	7
chr2_197777606_197786910	Yes	11	4	7	36	5	12	5	20	4
chr2_201721405_201721708	Yes	14	12	3	2	4	11	18	8	30
chr2_211018219_211019335	Yes	4	10	16	18	23	53	2	3	6
chr2_215657021_215661841	Yes	5	6	5	26	1	9	4	3	6
chr2_230633332_230636348	Yes	7	14	2	4	14	6	22	12	25
chr2_32117061_32145979	Yes	13	8	4	16	9	4	10	9	18
chr2_37543380_37544322	Yes	2	3	13	71	29	15	1	4	5
chr2_44139571_44145537	Yes	8	3	8	21	1	4	2	20	23
chr2_61605498_61622368	Yes	3	13	12	51	20	33	1	5	4
chr2_65559121_65572030	Yes	5	14	6	4	14	24	7	7	16
chr2_85188797_85190226	Yes	7	7	6	8	10	16	9	6	4
chr3_133341935_133343019	Yes	7	14	3	14	10	9	12	8	6
chr3_138244332_138256189	Yes	6	1	5	9	45	24	8	5	4
chr3_142144064_142145683	Yes	6	6	18	8	24	19	3	8	4
chr3_179310432_179319578	Yes	15	7	19	4	4	10	11	1	9
chr3_194169186_194175121	Yes	6	10	7	6	1	21	15	13	9
chr3_47476498_47484581	Yes	15	8	9	1	21	5	4	12	5
chr3_47716965_47719801	Yes	1	8	6	7	24	7	13	3	9
chr3_47719688_47727660	Yes	5	8	3	14	9	15	5	1	7
chr3_48209336_48219478	Yes	5	11	11	14	31	20	7	17	5
chr3_52988333_53003274	Yes	7	9	14	2	7	17	11	11	10
chr3_67546222_67571058	Yes	20	27	8	4	9	3	5	15	9
chr4_36230204_36231267	Yes	4	8	10	50	9	23	3	5	3
chr4_39301641_39304771	Yes	7	7	2	15	8	29	7	9	8
chr4_77051809_77057565	Yes	2	6	9	3	6	33	13	5	3
chr4_77976303_77987558	Yes	12	11	2	38	21	18	8	8	7
chr5_137897269_137903411	Yes	5	16	8	11	27	6	8	5	3
chr6_84055892_84117620	Yes	6	18	9	1	15	7	6	12	1
chr7_6452442_6456552	Yes	15	1	5	10	34	22	7	1	10
chr7_716866_720363	Yes	5	4	5	31	59	37	13	7	8
chr7_8257935_8275635	Yes	9	5	8	20	21	25	2	4	8
chr8_145737775_145738154	Yes	2	10	3	14	26	16	12	9	1
chr8_37734627_37735069	Yes	14	9	6	14	6	22	2	9	3
chr9_33953283_33956144	Yes	1	3	5	5	5	14	8	21	12
chr9_77611363_77632364	Yes	8	10	7	5	2	27	3	9	1
chrX_80047353_80049271	Yes	47	41	36	1	8	16	11	6	9
chr10_103432672_103436193	Yes	5	0	7	17	33	27	6	9	2
chr10_11639630_11643979	Yes	14	0	5	16	3	11	5	16	10
chr10_120460818_120489922	Yes	14	11	2	18	7	55	6	10	0
chr10_32197100_32211888	Yes	3	3	6	3	6	35	5	0	9
chr10_46158028_46159290	Yes	9	1	11	5	7	0	9	6	17
chr10_5827815_5842668	Yes	7	6	7	21	0	7	14	2	17
chr10_65140078_65214849	Yes	14	20	25	9	4	0	3	4	3
chr10_99196948_99197507	Yes	20	36	8	9	14	7	9	0	4
chr11_128963516_128997200	Yes	3	11	6	29	12	3	6	0	7
chr11_3712577_3714605	Yes	4	0	9	25	17	15	5	7	2
chr11_77336008_77336863	Yes	5	11	9	10	10	12	5	0	9
chr11_85692172_85695016	Yes	19	4	4	11	7	22	9	0	6
chr12_112116955_112121111	Yes	9	16	9	5	5	0	4	3	3
chr13_22088492_22122056	Yes	0	8	14	3	5	26	2	4	12
chr13_30104675_30127997	Yes	2	15	6	0	3	32	4	4	8
chr14_91947920_91957146	Yes	19	23	14	10	9	3	4	7	0
chr14_93760204_93762503	Yes	8	5	3	19	15	5	3	3	0
chr15_25599500_25605674	Yes	3	20	4	8	27	39	0	11	18
chr15_43086842_43109295	Yes	18	15	14	0	6	13	10	4	2
chr15_50592986_50593565	Yes	2	16	3	0	10	9	14	15	13
chr15_62325640_62336454	Yes	20	11	13	9	0	10	2	6	6
chr16_14687158_14698083	Yes	22	6	11	3	0	4	2	4	7
chr16_23091267_23093878	Yes	16	12	15	13	7	0	11	3	8
chr16_396148_397106	Yes	11	11	10	1	3	12	21	0	7
chr17_16089868_16097953	Yes	12	11	7	17	6	17	5	0	14
chr17_49057107_49064598	Yes	4	0	7	7	15	10	2	9	6
chr17_49097520_49109083	Yes	1	13	4	4	13	14	10	0	4
chr18_12356693_12360050	Yes	4	4	18	14	24	13	16	0	8
chr18_12506476_12535600	Yes	25	17	17	9	11	0	9	10	1
chr18_9583115_9595151	Yes	9	5	4	0	14	21	13	2	15
chr1_176050288_176085817	Yes	14	6	9	9	12	15	3	0	3
chr1_200583446_200584737	Yes	9	3	4	1	21	19	16	0	4
chr1_246490503_246498776	Yes	36	33	59	4	0	7	13	2	13
chr1_29481208_29481422	Yes	9	10	12	11	9	0	15	7	3
chr1_51253672_51267349	Yes	18	2	19	5	9	0	2	13	6
chr1_51871577_51874004	Yes	2	3	3	4	3	26	3	0	4
chr1_67356837_67371058	Yes	17	12	8	12	8	0	1	3	13
chr1_741179_745550	Yes	1	5	11	9	0	15	10	2	21
chr1_8555123_8601377	Yes	39	12	21	8	7	0	5	20	2
chr1_8568686_8617582	Yes	18	14	9	16	4	0	6	2	12
chr1_94107860_94140497	Yes	57	51	63	3	9	6	3	4	0
chr20_17933231_17934761	Yes	11	11	11	3	7	4	7	6	0
chr20_32677322_32678408	Yes	7	8	15	0	13	35	5	5	5
chr20_54956489_54959380	Yes	13	18	12	11	9	0	7	6	1
chr22_28269726_28293880	Yes	10	15	8	6	0	11	6	10	7
chr22_38641941_38644025	Yes	14	17	15	9	2	11	9	0	5
chr22_40948110_40990739	Yes	11	4	14	7	10	14	9	11	0
chr2_15629018_15674765	Yes	6	4	6	28	21	47	5	0	3
chr2_170394523_170401345	Yes	7	1	7	8	6	17	4	0	6
chr2_44139571_44153100	Yes	6	16	4	19	12	3	11	0	16
chr2_61715300_61717911	Yes	24	14	5	3	0	12	9	6	6
chr2_63540383_63609229	Yes	9	20	23	2	16	4	4	0	3
chr2_99786013_99787892	Yes	7	5	2	28	11	16	6	0	22
chr3_169831148_169840532	Yes	10	4	17	0	11	3	2	7	3
chr3_194877178_194947585	Yes	0	6	3	28	19	48	3	2	8
chr3_196812451_196831876	Yes	8	0	8	13	10	11	10	12	4
chr3_52156395_52159197	Yes	12	3	12	9	23	8	3	0	4
chr3_56703728_56707753	Yes	7	13	8	7	6	44	6	10	0
chr4_106345353_106377902	Yes	21	11	21	1	22	7	7	14	0
chr4_108603171_108615162	Yes	2	14	6	23	14	66	7	5	0
chr5_131052258_131080383	Yes	7	17	8	11	16	2	0	3	11
chr5_137904614_137906830	Yes	20	17	17	13	17	0	4	2	9
chr5_1488506_1501718	Yes	82	83	79	14	5	8	8	0	4
chr5_34175550_34182972	Yes	37	44	48	4	0	15	12	3	8
chr5_39002637_39021238	Yes	52	63	48	0	8	7	6	11	13
chr5_41794105_41807540	Yes	39	38	48	9	6	0	15	12	3
chr5_6604251_6605521	Yes	9	6	11	7	4	24	3	0	4
chr5_77452082_77461496	Yes	15	32	9	4	3	5	8	9	0
chr6_106696025_106740981	Yes	17	5	18	13	11	3	8	0	8
chr6_13639795_13644961	Yes	5	0	20	19	9	26	2	8	3
chr6_16586011_16658132	Yes	11	5	12	0	36	20	6	10	11
chr6_47251674_47254331	Yes	9	4	13	5	28	9	5	0	3
chr6_83667031_83754378	Yes	5	0	11	40	7	7	11	6	7
chr7_44465499_44467302	Yes	6	17	9	8	7	2	5	7	0
chr7_5680785_5692141	Yes	4	2	6	34	22	21	16	4	0
chr7_6085702_6089676	Yes	12	15	5	13	0	3	5	3	15
chr7_75182752_75183825	Yes	4	2	5	0	6	55	4	6	2
chr8_124243540_124251384	Yes	13	7	12	16	8	0	8	5	13
chr8_48866180_48869991	Yes	7	14	20	24	0	4	8	9	2
chr9_115024715_115060196	Yes	12	29	17	0	13	4	9	12	4
chr9_131503051_131505024	Yes	10	3	4	2	21	19	10	0	6
chr9_134518626_134526336	Yes	32	26	22	0	18	4	17	4	2
chr9_33960824_33973235	Yes	7	9	0	28	28	29	2	15	7
chr9_34286615_34290387	Yes	4	3	4	20	19	33	7	0	3
chrX_130883334_130928494	Yes	7	6	3	9	7	0	18	10	8
chr10_11523769_11527910	Yes	4	0	6	19	7	8	3	0	5
chr11_72598515_72613683	Yes	9	7	0	25	0	29	5	5	1
chr12_123678933_123682881	Yes	26	20	19	0	5	16	3	0	5
chr12_48482584_48491907	Yes	16	28	7	0	8	11	6	5	0
chr13_42352121_42393522	Yes	12	14	9	4	12	0	9	13	0
chr13_60407241_60413582	Yes	4	8	6	33	12	0	3	0	17
chr13_95813443_95818621	Yes	0	3	3	5	7	0	23	10	6
chr15_67528317_67529158	Yes	3	5	0	13	2	9	8	28	0
chr16_72122886_72124685	Yes	12	0	5	6	16	0	21	20	8
chr17_1339914_1340449	Yes	4	1	6	13	19	0	4	0	4
chr17_59821793_59857762	Yes	12	15	15	10	0	4	12	0	14
chr17_79532531_79539114	Yes	12	2	9	28	0	13	4	0	3
chr17_986760_1003975	Yes	5	7	6	23	10	0	9	12	0
chr19_39408364_39409453	Yes	5	5	2	12	6	0	25	0	22
chr19_5604594_5604947	Yes	6	4	3	0	15	16	9	0	21
chr1_179089325_179091002	Yes	5	0	7	30	8	36	4	0	5
chr1_63042933_63052295	Yes	25	21	9	5	0	8	5	0	7
chr1_8616534_8674745	Yes	12	12	11	5	4	0	8	0	5
chr20_34243124_34246936	Yes	12	17	16	0	4	20	21	0	4
chr22_32121524_32134897	Yes	12	13	9	0	4	6	5	3	0
chr22_46780440_46785396	Yes	15	8	2	0	18	25	3	0	7
chr2_215632206_215661841	Yes	4	5	9	26	9	0	3	0	7
chr3_128356642_128356948	Yes	2	12	18	0	10	5	6	5	0
chr3_155551257_155560408	Yes	14	10	9	4	0	5	0	8	6
chr3_48019355_48040369	Yes	8	15	8	0	11	19	4	11	0
chr3_48572945_48573896	Yes	1	4	10	0	15	16	9	0	4
chr3_67546222_67548719	Yes	25	43	27	3	23	0	10	0	9
chr4_140037803_140060651	Yes	16	13	23	0	3	12	5	0	5
chr5_157218711_157219003	Yes	0	6	16	11	0	36	3	8	4
chr5_87516380_87541609	Yes	19	14	20	7	7	0	14	0	5
chr5_92889467_92899169	Yes	21	9	6	0	10	7	11	0	9
chr6_105192035_105198347	Yes	54	41	52	0	6	10	5	0	9
chr6_105280917_105291173	Yes	10	8	16	8	0	21	4	0	5
chr6_145992375_146007432	Yes	22	33	21	6	9	0	8	13	0
chr6_31616454_31617404	Yes	6	6	12	0	11	26	9	6	0
chr7_102755507_102769239	Yes	8	0	5	20	7	4	4	0	17
chr8_71550050_71553285	Yes	72	97	85	21	5	0	0	3	4
chr9_130285958_130294057	Yes	81	76	79	0	4	9	3	5	0
chr9_95018962_95022516	Yes	19	9	16	10	0	5	3	0	15
chr2_201881714_201888762	Yes	10	0	18	0	11	26	13	6	0
chr10_1130343_1142186	Yes	81	71	56	57	73	51	110	127	79
chr10_1130343_1151207	Yes	26	3	9	12	13	41	23	14	17
chr10_126631026_126631876	Yes	462	387	423	377	525	612	193	147	101
chr10_225934_267296	Yes	35	40	30	6	22	37	104	35	42
chr10_76074425_76158337	Yes	53	49	50	10	1	29	27	37	15
chr10_7839010_7844817	Yes	25	20	13	42	29	34	36	19	40
chr10_86177527_86185649	Yes	24	23	25	15	26	12	23	8	28
chr10_90653628_90665417	Yes	27	85	32	50	18	20	23	19	27
chr11_117023157_117034608	Yes	31	25	27	134	98	128	40	35	72
chr11_120345269_120348235	Yes	13	21	28	45	70	38	44	68	35
chr11_120916383_120930794	Yes	47	51	36	34	16	16	27	20	15
chr11_12785726_12785981	Yes	94	130	72	123	135	106	86	133	98
chr11_20424465_20448411	Yes	28	19	15	59	8	26	45	19	27
chr11_33307959_33309057	Yes	449	499	453	1288	1282	1319	229	263	253
chr11_34093273_34098189	Yes	19	39	55	49	92	44	16	23	30
chr11_61133517_61135470	Yes	64	34	60	56	23	25	40	25	16
chr11_66407171_66407594	Yes	827	950	981	184	229	272	175	171	172
chr11_68115315_68115711	Yes	35	12	18	61	64	152	703	476	456
chr11_70200407_70208594	Yes	22	6	4	35	15	32	25	33	20
chr11_71693807_71701763	Yes	41	24	33	19	26	6	19	16	8
chr11_75590923_75623083	Yes	68	26	20	13	16	24	28	32	33
chr11_9451221_9452550	Yes	78	90	87	41	58	100	70	52	71
chr12_105385490_105389804	Yes	7	24	5	24	33	12	22	32	13
chr12_1136914_1137738	Yes	32	30	28	16	33	54	11	2	27
chr12_117423011_117426674	Yes	142	133	115	44	56	100	77	53	82
chr12_22796697_22826594	Yes	57	46	33	23	20	50	60	41	66
chr12_27867713_27877119	Yes	72	38	50	73	85	72	47	23	28
chr12_28378728_28412375	Yes	90	112	81	14	27	28	40	31	26
chr12_28458582_28460682	Yes	699	642	631	119	86	158	187	113	128
chr12_50821545_50824353	Yes	35	37	42	40	41	66	56	56	37
chr12_50821545_50829407	Yes	13	10	14	32	49	43	14	23	19
chr12_53670404_53671011	Yes	24	17	19	12	34	40	23	27	4
chr12_69983265_69985939	Yes	18	10	27	7	25	31	22	16	5
chr12_70193989_70195501	Yes	27	41	27	20	26	3	26	10	7
chr12_70671912_70704797	Yes	91	68	51	39	60	22	28	28	15
chr12_936208_939326	Yes	127	103	69	48	51	32	15	50	30
chr13_103275227_103280274	Yes	15	19	15	25	21	22	55	76	37
chr13_111274563_111276626	Yes	25	34	9	30	51	11	163	62	79
chr13_111870026_111896641	Yes	20	25	13	17	13	14	19	4	15
chr13_114164553_114175048	Yes	12	12	21	30	21	11	21	3	7
chr13_28748409_28771483	Yes	17	24	13	43	28	54	17	16	15
chr13_33306238_33309467	Yes	148	125	74	13	28	35	21	7	14
chr13_61013822_61041513	Yes	63	107	72	108	59	87	72	35	53
chr13_76134889_76143643	Yes	41	80	57	53	105	88	126	137	123
chr13_99890681_99896878	Yes	32	27	50	10	13	9	55	16	61
chr14_62188227_62188541	Yes	32	37	58	20	4	27	19	11	11
chr14_66028055_66028484	Yes	163	123	121	205	269	279	151	103	169
chr14_76642966_76662315	Yes	59	35	34	1	25	46	17	16	23
chr15_41961026_41962156	Yes	65	84	78	76	66	107	27	28	37
chr15_49517402_49531564	Yes	119	137	65	37	33	25	46	40	32
chr15_49517402_49584734	Yes	32	19	30	9	15	11	6	14	29
chr15_49528048_49531564	Yes	91	123	125	58	81	111	65	88	77
chr15_63845914_63855207	Yes	29	24	23	20	3	29	15	5	16
chr15_69728477_69729061	Yes	12	7	13	39	62	7	30	23	16
chr15_89656956_89659752	Yes	104	117	94	346	373	231	360	214	304
chr16_14738131_14738466	Yes	8	22	14	31	13	8	18	3	10
chr16_27224906_27226329	Yes	51	45	51	18	7	11	29	3	21
chr16_30740287_30740893	Yes	57	37	18	53	48	88	27	20	41
chr16_31733947_31734674	Yes	15	21	18	51	6	32	14	13	14
chr16_47497810_47549512	Yes	10	30	21	10	6	17	16	18	16
chr16_47531310_47549512	Yes	434	401	457	136	223	285	100	107	75
chr16_47531310_47581459	Yes	137	119	136	81	96	119	48	34	38
chr16_53907698_53922863	Yes	78	75	87	90	59	57	54	49	39
chr16_68300496_68309152	Yes	41	62	50	47	18	59	99	73	120
chr16_69269651_69279718	Yes	20	14	12	2	27	11	17	27	12
chr16_69729039_69729282	Yes	12	20	17	42	82	47	9	16	16
chr16_70497072_70497677	Yes	7	3	22	13	23	32	25	32	42
chr16_792250_792543	Yes	111	55	99	233	150	179	279	152	169
chr16_85667520_85667738	Yes	30	50	29	22	6	8	14	20	12
chr16_88061089_88071617	Yes	41	27	26	74	58	45	33	27	27
chr17_1746097_1747980	Yes	30	31	14	12	35	6	16	21	7
chr17_1746097_1756483	Yes	39	28	48	44	16	37	24	23	20
chr17_29483001_29497015	Yes	110	98	115	69	70	31	14	14	34
chr17_30310018_30315516	Yes	6	22	12	53	59	38	6	29	6
chr17_35343916_35348156	Yes	18	30	15	102	52	94	20	45	24
chr17_36517594_36533668	Yes	57	50	49	40	66	27	27	9	26
chr17_42231924_42232779	Yes	33	22	13	37	25	40	26	5	15
chr17_45740455_45745776	Yes	21	24	12	4	8	29	8	15	13
chr17_46189393_46190763	Yes	24	33	47	75	58	49	13	7	14
chr17_57808782_57816308	Yes	69	78	72	231	190	329	54	46	49
chr17_58700882_58711338	Yes	21	11	15	79	67	61	36	48	37
chr17_58711214_58725443	Yes	48	48	35	26	51	55	44	36	34
chr17_7402358_7402810	Yes	12	10	10	31	30	13	17	8	12
chr17_75398141_75398785	Yes	52	31	52	105	65	31	51	31	18
chr17_80521230_80526077	Yes	95	100	88	79	132	73	57	109	73
chr17_80721841_80739597	Yes	18	17	33	58	20	50	13	11	11
chr17_80828100_80851508	Yes	19	37	24	32	39	23	40	29	33
chr17_80828100_80858607	Yes	20	37	9	21	35	80	48	89	35
chr17_80842021_80858607	Yes	13	20	17	8	19	40	13	10	21
chr17_80842021_80861354	Yes	181	140	162	143	95	227	42	25	23
chr17_80842021_80869665	Yes	40	29	44	46	42	40	40	32	39
chr17_80858527_80869665	Yes	36	46	64	95	53	22	50	60	21
chr17_80861281_80869665	Yes	42	13	21	10	19	36	22	19	25
chr17_80863812_80869665	Yes	46	39	19	26	42	63	42	2	28
chr18_196637_204692	Yes	9	19	20	6	11	17	14	13	16
chr18_21644104_21649235	Yes	86	103	119	117	60	120	38	48	36
chr18_29691717_29693823	Yes	124	82	72	16	38	41	32	43	15
chr18_74561482_74563895	Yes	75	82	104	42	85	62	76	83	66
chr18_8718422_8720494	Yes	50	27	40	21	10	38	46	59	62
chr18_9931807_9937063	Yes	288	248	268	77	121	140	43	46	26
chr19_11230768_11231198	Yes	16	17	19	47	55	93	55	39	62
chr19_12923897_12924379	Yes	43	25	9	3	16	48	23	34	41
chr19_17212470_17213367	Yes	15	12	25	56	52	135	65	40	52
chr19_17387304_17387718	Yes	115	55	97	34	39	16	17	20	4
chr19_18285850_18286507	Yes	27	33	30	48	38	21	59	14	30
chr19_34921481_34925873	Yes	65	82	70	153	136	122	101	86	66
chr19_34921481_34929671	Yes	54	34	40	92	72	159	39	66	29
chr19_47865733_47865950	Yes	9	14	16	19	13	16	22	18	4
chr19_5039847_5047680	Yes	70	68	99	32	37	6	21	5	11
chr19_50902108_50902741	Yes	33	24	35	72	78	74	49	31	64
chr19_58904343_58904854	Yes	29	14	34	73	46	53	147	39	38
chr1_10155519_10165802	Yes	82	66	43	25	48	40	20	11	3
chr1_113196220_113202401	Yes	36	23	33	41	29	55	35	18	33
chr1_146724278_146731572	Yes	51	42	43	15	15	31	17	12	14
chr1_151611364_151611595	Yes	172	131	125	31	37	72	55	60	80
chr1_167734820_167745403	Yes	29	17	22	58	12	69	8	28	14
chr1_167935867_167944253	Yes	91	76	80	28	32	22	15	28	21
chr1_200729967_200784772	Yes	80	59	101	55	35	41	21	20	29
chr1_212218002_212220759	Yes	19	14	31	25	14	23	28	12	14
chr1_213251038_213290752	Yes	49	44	41	20	22	14	19	27	6
chr1_23356962_23377013	Yes	275	292	274	96	81	98	94	67	44
chr1_44877653_44878394	Yes	121	149	107	91	89	115	43	65	36
chr1_45223228_45223812	Yes	31	8	15	45	58	56	17	5	17
chr1_65830318_65831879	Yes	260	272	204	127	98	142	118	129	134
chr1_92798948_92846430	Yes	110	119	131	37	31	21	34	28	40
chr1_95609447_95639445	Yes	26	20	33	10	9	12	2	14	16
chr20_10536879_10541468	Yes	32	16	33	26	37	49	29	13	26
chr20_21346059_21349228	Yes	6	19	7	7	34	13	34	35	42
chr20_25614685_25626284	Yes	24	33	13	26	27	31	29	16	20
chr20_30954187_30956926	Yes	222	215	200	102	78	104	57	26	44
chr20_32207323_32211102	Yes	40	41	35	63	36	28	60	27	40
chr20_35835676_35838568	Yes	11	20	14	8	38	4	35	28	19
chr20_36685934_36694658	Yes	47	47	30	96	78	39	36	53	39
chr20_3888573_3893281	Yes	18	28	32	12	42	72	30	42	22
chr20_62559688_62562375	Yes	23	38	8	14	24	46	42	34	32
chr21_34804484_34805178	Yes	66	64	57	47	22	70	40	25	37
chr21_38792601_38802702	Yes	75	108	100	115	79	118	31	19	25
chr21_38792601_38845182	Yes	87	80	34	46	47	32	26	35	12
chr21_47768926_47769734	Yes	41	37	17	46	41	20	13	11	27
chr21_47801609_47805898	Yes	39	98	61	42	51	22	29	21	17
chr22_21288067_21288532	Yes	47	30	50	41	63	103	16	40	39
chr22_30032740_30038274	Yes	146	112	106	36	73	104	21	26	7
chr22_41277774_41278181	Yes	33	23	25	46	74	112	31	26	10
chr22_42204879_42206295	Yes	37	49	45	31	16	9	58	53	44
chr22_46085592_46098727	Yes	206	186	181	29	30	11	44	9	39
chr22_46085592_46114373	Yes	257	224	264	59	39	76	62	41	29
chr22_46096162_46136418	Yes	161	102	127	28	37	21	20	24	15
chr22_46125305_46136418	Yes	241	201	221	72	52	42	102	68	48
chr22_47022648_47033857	Yes	22	12	18	20	25	55	8	39	4
chr2_109455641_109473426	Yes	36	27	28	36	43	27	10	14	7
chr2_109463194_109473426	Yes	56	24	42	28	20	60	52	20	21
chr2_120684174_120692534	Yes	20	26	12	44	15	9	21	12	11
chr2_122514816_122519100	Yes	37	43	23	22	9	19	17	12	16
chr2_135010666_135012215	Yes	16	16	10	166	115	169	112	48	48
chr2_148653870_148657467	Yes	45	71	43	36	46	57	16	6	12
chr2_159922408_159954346	Yes	56	23	33	4	45	23	27	15	7
chr2_169547544_169574488	Yes	15	13	6	21	22	24	22	13	17
chr2_174223440_174224219	Yes	20	23	17	26	29	24	29	41	25
chr2_183993015_183998351	Yes	33	23	25	16	12	5	33	15	27
chr2_184016236_184025923	Yes	42	38	53	6	20	53	16	15	20
chr2_190656516_190682906	Yes	25	44	31	26	34	67	23	20	23
chr2_191523884_191537878	Yes	73	88	71	62	71	46	67	127	110
chr2_209150450_209153542	Yes	47	36	27	26	21	7	12	17	10
chr2_234296903_234299129	Yes	40	26	24	76	54	146	29	8	31
chr2_24205766_24207701	Yes	2	18	11	4	10	20	9	27	15
chr2_24786773_24807429	Yes	14	12	28	49	42	33	10	5	21
chr2_30748453_30756180	Yes	116	85	50	50	32	83	88	22	43
chr2_32713655_32718734	Yes	14	8	12	50	8	10	6	16	12
chr2_48701822_48718309	Yes	21	4	12	8	21	61	12	23	15
chr2_58311224_58316858	Yes	74	81	126	64	44	30	55	20	53
chr2_64083440_64085070	Yes	56	80	60	124	81	179	38	44	25
chr3_11399892_11421526	Yes	80	70	61	39	57	78	23	19	7
chr3_11399892_11468400	Yes	149	145	143	57	117	95	26	25	35
chr3_127980971_127983624	Yes	42	39	37	29	31	21	18	13	14
chr3_130649260_130660543	Yes	13	19	32	36	16	15	15	9	17
chr3_141231005_141259451	Yes	24	16	29	34	118	27	9	9	14
chr3_142455221_142467302	Yes	175	148	185	39	68	91	47	7	39
chr3_149563798_149589941	Yes	97	116	84	35	57	62	42	20	4
chr3_149563798_149639014	Yes	134	129	88	177	101	90	38	32	60
chr3_149613260_149639014	Yes	46	28	33	97	87	95	24	15	21
chr3_157839892_157841780	Yes	157	160	150	208	149	311	99	168	134
chr3_195415404_195416309	Yes	12	29	11	15	14	10	12	23	26
chr3_31617888_31621588	Yes	327	268	362	250	198	280	129	76	130
chr3_50102464_50103935	Yes	53	51	90	106	110	62	74	71	64
chr3_63898264_63898901	Yes	27	25	40	42	40	27	41	36	22
chr4_148867768_148887990	Yes	102	86	83	33	34	20	18	27	31
chr4_186168448_186188309	Yes	147	109	111	559	492	491	105	75	81
chr4_186168448_186209236	Yes	18	21	22	94	132	80	14	18	22
chr4_25334805_25335610	Yes	33	26	63	16	38	42	30	42	13
chr4_3088666_3109150	Yes	113	97	113	51	56	116	78	51	45
chr4_4650704_4651269	Yes	155	77	94	12	13	7	51	25	32
chr4_6925100_6925838	Yes	33	31	32	32	90	57	134	62	116
chr4_6925100_6969151	Yes	48	25	40	69	108	36	76	90	151
chr5_109049221_109051965	Yes	45	44	27	24	42	28	20	7	6
chr5_109049221_109065214	Yes	45	58	43	38	55	34	26	11	18
chr5_142416761_142437312	Yes	13	13	36	38	54	69	58	37	20
chr5_142434004_142437312	Yes	51	33	60	37	49	70	124	80	27
chr5_145634506_145638156	Yes	19	21	31	5	23	58	25	15	31
chr5_151169884_151170623	Yes	9	22	6	52	52	59	13	27	15
chr5_167927596_167929110	Yes	54	52	66	36	10	17	16	33	10
chr5_170305101_170323119	Yes	190	109	174	43	44	31	6	30	4
chr5_170610199_170632616	Yes	154	150	145	59	154	103	35	46	20
chr5_21491430_21495291	Yes	21	32	28	14	19	1	51	34	20
chr5_43675613_43677908	Yes	75	83	52	32	9	6	33	22	16
chr5_43675613_43704502	Yes	121	106	121	51	31	81	53	65	26
chr5_56160561_56161804	Yes	56	43	54	69	61	84	21	13	20
chr5_60768508_60768864	Yes	180	126	142	37	67	81	34	14	10
chr5_61745754_61747760	Yes	21	15	22	11	17	16	25	22	21
chr5_619105_620376	Yes	299	320	276	19	9	20	39	15	27
chr5_619105_624694	Yes	50	49	47	24	9	17	32	16	12
chr5_65284463_65290692	Yes	644	647	622	70	158	195	45	18	57
chr5_6737623_6746540	Yes	98	109	120	12	10	27	59	40	71
chr5_68470704_68471364	Yes	132	111	112	65	92	70	73	49	33
chr5_70888753_70900295	Yes	21	22	12	26	28	23	21	28	15
chr5_76342172_76344097	Yes	17	11	13	15	18	1	8	9	14
chr5_95091100_95099324	Yes	253	198	275	123	138	128	44	54	38
chr6_111208708_111211559	Yes	228	162	173	124	128	152	118	80	116
chr6_117019867_117026323	Yes	127	61	76	12	14	37	32	33	47
chr6_126332399_126334247	Yes	22	25	26	2	17	14	23	15	32
chr6_155108995_155116273	Yes	19	14	13	38	26	38	41	53	13
chr6_159001972_159010814	Yes	129	89	113	64	51	98	262	185	150
chr6_159004986_159010814	Yes	286	207	277	221	194	258	415	331	399
chr6_161443042_161455481	Yes	116	130	107	55	13	12	18	21	20
chr6_20546577_20548936	Yes	11	20	22	17	15	3	24	29	16
chr6_24416625_24418806	Yes	12	14	24	3	12	17	16	7	10
chr6_47471016_47472494	Yes	6	19	10	27	21	12	28	33	15
chr6_5404775_5431405	Yes	68	89	61	4	32	28	47	2	16
chr6_76412361_76412788	Yes	9	17	27	15	28	27	14	23	6
chr6_87925621_87928449	Yes	95	61	85	68	96	135	25	14	17
chr7_102106264_102106717	Yes	18	10	12	24	36	26	33	8	30
chr7_102398301_102401858	Yes	159	142	114	42	94	68	46	58	50
chr7_104678573_104681470	Yes	100	50	59	88	92	71	16	6	9
chr7_131060183_131084192	Yes	183	133	122	60	65	163	99	86	78
chr7_131071879_131084192	Yes	43	37	58	70	34	108	29	20	24
chr7_141336760_141349133	Yes	62	93	89	35	21	12	19	25	33
chr7_155465561_155473602	Yes	177	226	225	242	212	312	154	251	242
chr7_156758964_156759786	Yes	17	19	26	23	26	55	26	47	27
chr7_158704241_158711560	Yes	57	31	50	13	10	17	15	12	6
chr7_16720926_16729531	Yes	12	16	4	15	20	17	13	12	19
chr7_24663282_24681487	Yes	13	20	15	13	36	12	25	19	18
chr7_24663282_24690331	Yes	7	11	23	20	20	12	6	17	16
chr7_30661009_30662078	Yes	30	20	20	34	15	21	15	20	8
chr7_33185854_33217203	Yes	99	154	141	52	65	61	37	37	24
chr7_44684926_44687358	Yes	47	46	48	54	38	81	30	7	17
chr7_56049903_56051561	Yes	27	39	30	36	1	17	29	12	26
chr7_77214860_77230123	Yes	54	40	34	66	77	128	15	34	30
chr7_87593949_87607727	Yes	16	13	16	19	17	64	15	13	23
chr7_92921015_92926555	Yes	38	40	47	55	57	98	16	21	6
chr7_99621042_99621930	Yes	71	61	67	372	354	436	175	169	179
chr8_100286426_100287482	Yes	73	39	40	8	15	12	19	10	2
chr8_124089351_124096580	Yes	51	34	30	33	14	11	76	51	55
chr8_132952746_132958880	Yes	42	41	41	21	45	20	35	23	38
chr8_145245687_145255444	Yes	31	24	26	113	91	145	73	21	46
chr8_26439485_26441499	Yes	253	323	287	97	123	185	28	67	50
chr8_37971710_37978667	Yes	12	9	14	42	19	17	16	5	14
chr8_48320423_48353104	Yes	144	157	167	79	47	29	17	26	20
chr8_97318672_97343323	Yes	3	11	21	16	8	38	44	23	16
chr8_98817581_98837381	Yes	83	69	88	21	26	13	26	36	31
chr9_102677460_102691125	Yes	34	47	64	12	16	14	17	17	27
chr9_125042722_125054119	Yes	124	69	109	114	191	215	63	50	37
chr9_128099297_128099870	Yes	89	74	49	42	47	60	36	28	20
chr9_20819795_20823114	Yes	259	250	194	97	119	100	76	35	63
chr9_33351558_33352717	Yes	13	15	28	50	28	45	36	9	9
chr9_37424842_37426651	Yes	33	32	27	56	64	105	30	34	46
chr9_4823548_4827033	Yes	20	28	28	20	34	36	10	16	28
chr9_4823548_4833228	Yes	42	40	50	26	11	4	34	59	15
chr9_6420912_6434173	Yes	65	32	54	99	98	76	69	41	21
chr9_6849507_6893232	Yes	15	27	13	32	28	31	29	17	23
chr9_6880012_6893232	Yes	52	50	59	60	62	69	115	63	48
chr9_96233423_96238620	Yes	187	194	201	57	94	150	130	74	80
chr9_96233423_96259881	Yes	19	22	22	2	19	41	21	15	12
chr9_96233423_96261168	Yes	184	153	145	244	116	124	140	161	131
chr9_98740343_98766983	Yes	200	191	214	48	32	33	35	70	32
chrX_133607389_133627620	Yes	14	11	14	12	9	11	4	2	26
chrX_24190832_24197887	Yes	137	86	155	113	176	203	60	89	51
chrX_47705504_47755339	Yes	152	163	132	125	129	270	140	199	194
chr11_32611093_32617593	Yes	16	3	13	16	17	0	42	33	42
chr11_36248635_36248980	Yes	0	50	31	15	18	11	17	19	20
chr12_27521195_27533337	Yes	17	0	26	9	11	11	23	14	2
chr12_32751431_32764217	Yes	39	11	27	27	23	0	8	31	2
chr13_50025689_50026045	Yes	16	6	20	29	22	74	23	0	23
chr15_49528048_49584734	Yes	22	11	44	26	46	0	26	15	13
chr15_72810408_72848248	Yes	18	21	20	27	15	0	18	3	11
chr15_72810408_72853890	Yes	31	30	26	12	37	0	17	2	19
chr15_80412670_80415142	Yes	277	275	0	116	159	72	77	67	70
chr16_21979949_21987564	Yes	13	13	7	23	14	0	11	18	6
chr17_49340635_49346265	Yes	42	47	23	32	53	15	24	0	29
chr18_19202686_19203900	Yes	21	23	10	0	27	11	18	24	10
chr19_16790795_16793319	Yes	22	16	17	0	16	53	13	10	22
chr19_5047487_5082515	Yes	67	29	37	33	60	0	25	40	17
chr1_167921038_167944253	Yes	42	36	63	21	12	0	18	5	17
chr20_25612794_25615463	Yes	11	5	16	18	20	0	22	14	13
chr20_33057853_33069011	Yes	0	13	41	25	46	25	33	27	21
chr21_37619815_37620866	Yes	10	17	10	63	54	106	16	0	17
chr2_136505837_136519481	Yes	50	70	0	46	55	37	31	3	6
chr2_183993015_183995273	Yes	20	6	8	8	15	14	22	0	18
chr3_120469370_120469847	Yes	19	13	16	0	23	50	3	20	16
chr5_14405957_14420130	Yes	19	14	10	0	28	6	20	12	17
chr5_73136305_73136585	Yes	72	43	44	69	1	22	23	0	10
chr6_158994452_159010814	Yes	99	31	0	37	12	33	152	79	49
chr8_128902835_128903244	Yes	433	372	472	0	783	690	192	158	141
chrX_67731691_67742759	Yes	60	51	73	16	0	26	16	15	13
chr15_50757244_50763992	Yes	14	10	14	0	33	11	21	0	11
chr10_12257739_12280484	Yes	17	22	25	1	7	18	13	41	26
chr10_128768966_128788867	Yes	23	18	9	15	41	24	9	16	5
chr10_49609655_49618211	Yes	60	54	69	41	13	12	10	5	13
chr10_94653106_94669388	Yes	20	7	15	3	14	1	14	9	9
chr10_96201653_96234540	Yes	41	32	31	24	11	18	12	3	8
chr11_110007388_110008139	Yes	29	25	15	43	55	47	5	4	2
chr11_120310838_120316173	Yes	3	12	3	20	6	21	14	19	5
chr11_120343759_120348235	Yes	4	2	5	25	22	4	12	23	9
chr11_129979324_129980556	Yes	18	8	17	34	25	13	12	7	3
chr11_14793483_14810788	Yes	13	8	23	1	4	5	54	41	56
chr11_62650380_62653080	Yes	48	48	42	32	30	49	17	6	2
chr11_70200407_70202360	Yes	7	11	11	21	31	62	14	10	16
chr11_9430033_9438695	Yes	8	14	13	8	2	21	1	3	8
chr11_9441958_9446809	Yes	11	21	13	25	6	12	6	7	6
chr12_100676721_100691953	Yes	15	14	19	15	10	10	5	1	8
chr12_117402502_117426674	Yes	19	17	21	26	13	22	4	11	1
chr12_120995085_120995485	Yes	76	17	41	14	14	17	11	2	12
chr12_19615444_19626289	Yes	86	90	80	16	8	29	12	15	1
chr12_50824278_50835426	Yes	30	6	7	11	27	19	3	3	16
chr12_51173923_51203372	Yes	78	59	63	6	26	28	13	2	4
chr12_6630964_6632512	Yes	7	19	10	15	7	10	9	4	14
chr12_98921664_98931350	Yes	11	17	20	24	7	2	1	10	11
chr13_26911704_26928017	Yes	32	22	39	116	148	95	9	3	17
chr13_28748409_28794515	Yes	14	15	14	16	13	9	7	5	16
chr13_45725822_45781640	Yes	24	13	13	22	28	42	4	9	6
chr13_47297356_47308133	Yes	3	9	2	67	33	55	62	48	58
chr13_96361481_96377506	Yes	24	15	21	5	6	4	20	28	2
chr13_98865474_98865667	Yes	4	9	12	14	6	12	17	17	16
chr13_99061592_99064288	Yes	5	4	6	13	32	14	13	20	7
chr14_103336522_103342862	Yes	16	10	14	22	25	24	2	5	9
chr14_73614503_73614802	Yes	18	11	22	19	2	9	11	6	14
chr14_76633006_76662315	Yes	22	5	5	10	18	18	6	5	6
chr15_41988273_41991357	Yes	11	17	2	5	17	20	3	28	13
chr15_57383987_57387361	Yes	65	44	29	10	10	1	15	36	11
chr15_89656956_89698765	Yes	6	6	7	37	29	15	48	9	22
chr16_16101673_16110478	Yes	62	61	60	11	4	16	4	10	13
chr16_66971940_66973261	Yes	3	1	5	16	14	61	15	13	21
chr17_26490569_26499644	Yes	16	19	24	41	31	8	3	5	1
chr17_28808161_28811788	Yes	8	1	3	3	11	17	8	6	22
chr17_29483001_29490394	Yes	38	16	33	2	29	21	5	7	2
chr17_34910661_34923615	Yes	18	19	9	35	40	46	5	15	10
chr17_37864574_37866734	Yes	12	14	23	27	6	57	4	1	12
chr17_45741525_45745776	Yes	13	1	15	5	24	3	8	25	7
chr17_5250085_5253924	Yes	9	11	10	5	20	30	18	23	19
chr17_53150261_53158544	Yes	13	13	7	8	1	13	10	14	17
chr17_57647879_57650596	Yes	10	11	16	5	9	7	6	14	13
chr17_79660684_79661883	Yes	10	7	2	77	64	104	34	58	36
chr18_19345733_19359646	Yes	64	81	64	41	35	31	10	1	19
chr18_196637_199316	Yes	24	14	12	8	9	26	4	3	6
chr18_56363598_56367823	Yes	19	14	38	21	2	21	3	11	3
chr18_9524592_9525849	Yes	11	17	13	20	12	56	13	10	5
chr19_1031070_1032695	Yes	3	4	3	6	1	51	56	16	28
chr19_10883155_10887892	Yes	13	9	11	13	12	44	9	7	1
chr19_11223954_11224438	Yes	2	9	11	16	13	5	13	26	18
chr19_34922766_34929671	Yes	22	30	24	9	64	78	17	7	5
chr19_34954931_34957919	Yes	28	19	9	16	12	13	4	3	13
chr19_5032877_5041262	Yes	15	11	15	24	18	6	4	3	5
chr1_100459093_100464971	Yes	32	31	42	2	6	21	45	21	44
chr1_151139410_151139890	Yes	6	21	3	8	13	13	8	4	25
chr1_167734820_167742605	Yes	14	5	15	3	6	14	17	28	8
chr1_172525009_172526934	Yes	18	13	11	8	12	34	9	4	8
chr1_172569204_172571927	Yes	8	13	6	31	5	15	18	8	14
chr1_201816407_201817722	Yes	14	13	21	28	13	14	7	6	5
chr1_219366424_219385094	Yes	9	36	17	20	2	11	7	5	8
chr1_219366424_219392054	Yes	39	10	30	13	27	30	6	4	11
chr1_22404922_22413359	Yes	36	52	45	12	2	6	17	8	16
chr1_230798887_230810870	Yes	24	18	31	17	24	25	5	13	6
chr1_233482188_233490757	Yes	26	22	18	10	10	14	10	10	5
chr1_236969444_236979843	Yes	27	9	11	1	23	18	5	5	6
chr1_35879573_35881315	Yes	47	32	34	5	30	7	3	1	6
chr20_21321359_21327188	Yes	11	12	1	24	41	19	39	23	12
chr20_47682729_47683817	Yes	1	4	3	11	37	22	16	23	10
chr21_17150223_17177577	Yes	18	24	32	13	24	4	13	4	1
chr21_34799191_34805178	Yes	26	9	24	27	6	20	13	3	9
chr21_37775056_37783902	Yes	3	4	6	29	40	39	35	19	27
chr21_45497574_45500008	Yes	9	12	9	12	46	18	31	20	33
chr22_46096162_46114373	Yes	29	16	44	6	6	7	19	7	9
chr2_120885264_120932580	Yes	37	23	51	5	22	4	4	11	7
chr2_136360070_136362586	Yes	9	3	6	29	10	35	10	20	8
chr2_162036125_162061304	Yes	8	19	15	18	17	44	2	16	6
chr2_173435454_173460751	Yes	16	18	5	16	29	26	19	7	2
chr2_190656516_190670480	Yes	3	9	13	33	28	8	25	75	26
chr2_191765290_191769893	Yes	16	10	4	24	26	29	21	4	13
chr2_191765290_191789319	Yes	6	7	6	18	17	34	18	20	14
chr2_207144264_207162097	Yes	96	42	77	88	59	103	12	4	4
chr2_26596235_26598016	Yes	16	22	11	5	2	18	6	43	33
chr2_48555700_48573890	Yes	5	11	3	6	24	13	32	41	32
chr2_9490937_9508648	Yes	11	34	20	21	53	56	13	6	4
chr3_119219542_119232566	Yes	21	17	9	27	19	34	3	5	11
chr3_128525215_128526514	Yes	22	23	14	2	16	28	6	10	6
chr3_149563798_149613347	Yes	26	10	20	26	10	18	3	10	8
chr3_197592294_197602646	Yes	11	30	15	36	79	13	7	9	9
chr3_23541099_23574192	Yes	12	13	17	11	12	23	2	5	6
chr3_31617888_31641951	Yes	77	77	74	53	27	64	9	4	2
chr3_3178944_3182332	Yes	46	33	26	14	4	11	18	16	19
chr3_32745360_32750312	Yes	23	47	18	52	11	37	11	7	2
chr3_51575514_51586079	Yes	35	39	36	47	13	24	6	11	5
chr3_5212188_5216099	Yes	105	80	69	1	18	6	10	21	16
chr4_123856869_123900541	Yes	28	19	8	4	18	16	7	6	7
chr4_144449021_144451679	Yes	11	8	8	10	30	18	3	24	8
chr4_148860976_148876525	Yes	22	34	22	18	31	4	5	4	2
chr4_148860976_148887990	Yes	18	26	23	13	20	17	6	3	8
chr4_153750777_153793716	Yes	2	4	25	12	9	17	11	11	1
chr4_154191487_154197282	Yes	36	49	26	13	12	14	1	6	6
chr4_1902353_1906105	Yes	14	4	9	19	28	51	27	7	11
chr4_2492064_2502465	Yes	11	10	8	9	17	12	28	18	13
chr4_52729603_52744020	Yes	12	13	16	7	4	12	11	18	15
chr5_122881111_122893258	Yes	40	27	53	18	46	38	13	4	5
chr5_135483521_135489852	Yes	16	10	7	42	21	50	14	5	3
chr5_138614016_138614818	Yes	4	13	10	14	15	10	7	8	23
chr5_138979957_139003046	Yes	8	12	15	1	22	65	13	7	2
chr5_139819704_139825560	Yes	7	8	10	7	26	6	8	11	18
chr5_14316622_14336836	Yes	55	31	60	35	46	61	16	4	9
chr5_21491430_21497305	Yes	4	8	6	7	10	17	15	17	15
chr5_77711344_77717784	Yes	39	68	34	38	42	15	13	12	5
chr6_142487365_142491558	Yes	4	4	15	1	10	43	11	19	8
chr6_155095123_155116273	Yes	9	3	12	51	66	35	63	34	59
chr6_157357969_157406039	Yes	17	4	5	21	21	54	36	18	42
chr6_158733083_158735300	Yes	1	7	6	39	17	34	11	22	5
chr6_42571326_42574389	Yes	44	50	9	18	37	1	5	10	2
chr6_5368783_5369415	Yes	32	21	24	12	7	18	14	6	8
chr6_87920169_87928449	Yes	48	38	35	47	42	61	14	8	7
chr7_131113792_131130662	Yes	27	26	15	30	41	6	10	8	8
chr7_138951079_138957186	Yes	23	6	6	28	12	8	7	13	9
chr7_157015948_157018233	Yes	12	2	9	2	20	22	14	3	16
chr7_23650790_23651172	Yes	31	45	38	12	7	6	13	22	8
chr7_73770740_73771807	Yes	5	6	3	77	78	109	36	9	14
chr7_74119496_74133260	Yes	20	31	18	21	9	21	11	1	13
chr7_77407655_77408131	Yes	3	5	20	19	30	6	10	13	14
chr7_810108_814799	Yes	7	2	9	39	38	42	35	26	38
chr7_99952766_99953427	Yes	9	5	9	52	15	29	3	28	5
chr8_129021836_129022690	Yes	12	23	11	9	12	15	6	7	1
chr8_22332467_22333137	Yes	10	17	7	41	5	16	4	12	1
chr9_19356970_19358158	Yes	16	12	3	8	3	35	10	5	4
chr9_22046750_22064017	Yes	22	11	17	34	21	30	7	13	6
chr9_33318729_33319125	Yes	6	8	4	3	17	16	12	11	12
chr9_98740343_98742148	Yes	32	15	21	9	24	26	7	6	9
chrX_24082318_24086225	Yes	13	9	29	7	5	26	6	4	5
chrX_72797243_72804408	Yes	33	18	25	27	5	30	7	1	6
chr10_28872328_28879761	Yes	24	20	11	13	19	12	11	0	5
chr10_5751493_5756170	Yes	17	9	30	8	16	28	6	0	8
chr10_76978821_76979114	Yes	23	26	14	6	17	0	11	27	16
chr10_93185038_93221941	Yes	151	117	133	11	19	33	7	5	0
chr10_94653106_94659401	Yes	68	50	27	6	6	30	10	0	3
chr11_120916383_120924441	Yes	16	12	8	2	23	14	6	0	5
chr11_61205097_61205585	Yes	12	12	6	8	0	47	13	20	19
chr11_68115315_68125315	Yes	2	8	11	29	5	0	50	10	31
chr11_68115315_68133170	Yes	14	9	0	12	12	38	49	19	16
chr11_74521229_74528759	Yes	10	17	14	18	16	25	10	0	12
chr12_32760891_32764217	Yes	29	25	48	11	11	0	18	12	3
chr12_922808_939326	Yes	16	21	27	31	7	9	6	0	12
chr13_111274563_111279894	Yes	3	14	10	0	6	30	15	23	6
chr13_114174931_114193822	Yes	9	6	7	44	24	0	35	11	28
chr13_28748409_28752072	Yes	35	19	19	21	31	22	0	15	3
chr14_73614503_73640415	Yes	15	19	19	26	17	0	7	9	2
chr14_89041037_89044484	Yes	3	15	14	19	38	29	6	14	0
chr16_16180681_16184445	Yes	13	7	11	4	13	17	16	0	5
chr16_89164999_89169167	Yes	8	16	10	10	9	0	12	6	19
chr17_20107646_20109225	Yes	15	19	4	11	15	10	3	13	0
chr17_48818463_48819092	Yes	11	11	16	5	2	28	4	0	5
chr17_53108529_53124515	Yes	19	5	12	12	9	12	5	0	4
chr17_57808782_57851246	Yes	8	9	8	46	54	0	5	25	4
chr17_57842332_57851246	Yes	330	219	238	33	26	6	24	3	0
chr17_58756814_58786686	Yes	25	48	49	31	34	36	20	0	8
chr17_78593427_78617610	Yes	13	12	8	14	6	18	3	3	0
chr18_12999420_13030607	Yes	9	11	12	29	4	0	7	16	1
chr18_2666156_2674144	Yes	7	11	13	13	23	9	3	9	0
chr19_4941540_4941943	Yes	10	28	11	12	6	0	16	11	10
chr1_146757975_146759412	Yes	26	13	26	3	14	6	30	0	5
chr1_155695173_155695810	Yes	13	18	36	8	5	0	23	6	13
chr1_172520652_172526934	Yes	89	59	70	0	37	45	13	12	4
chr1_198201683_198233365	Yes	17	25	20	13	7	31	12	0	18
chr1_225140372_225195246	Yes	14	8	18	0	7	13	10	17	8
chr1_230798887_230807386	Yes	22	22	39	22	13	0	5	7	5
chr1_26584088_26586293	Yes	26	19	27	12	13	26	16	0	11
chr1_41474466_41475926	Yes	33	36	47	14	13	0	11	10	25
chr1_43239234_43241150	Yes	13	21	25	5	34	11	4	0	14
chr20_30954187_30978970	Yes	25	18	28	23	23	26	5	0	6
chr20_33077071_33080402	Yes	13	11	7	14	32	12	12	0	3
chr20_37612342_37623523	Yes	12	34	13	13	5	0	6	19	6
chr22_46085592_46136418	Yes	37	20	45	25	10	18	8	0	14
chr22_50810449_50832564	Yes	52	35	62	47	10	0	5	7	12
chr2_10281981_10282502	Yes	0	3	4	6	8	26	22	27	53
chr2_160025761_160027316	Yes	13	17	9	7	7	18	3	0	5
chr2_184016236_184047408	Yes	16	7	12	7	14	35	17	3	0
chr2_236649607_236659132	Yes	13	13	21	1	10	22	6	0	4
chr2_236706403_236715975	Yes	12	13	13	33	48	58	14	0	4
chr2_26587170_26598016	Yes	30	19	27	6	27	27	4	0	9
chr2_44436349_44445676	Yes	15	17	14	3	18	10	0	10	7
chr2_9419446_9437574	Yes	11	13	11	49	66	62	8	0	7
chr3_128514203_128526514	Yes	18	26	12	28	39	0	5	6	1
chr3_149563798_149619949	Yes	30	34	28	47	29	32	6	0	5
chr3_149563798_149629870	Yes	22	3	13	21	9	9	5	5	0
chr3_155611307_155615830	Yes	20	16	7	0	21	3	9	37	3
chr4_110412483_110416012	Yes	28	31	18	23	14	57	3	0	4
chr4_148778704_148803083	Yes	33	28	37	41	27	50	7	0	4
chr4_3188324_3190820	Yes	8	10	17	4	21	30	12	0	9
chr4_79747191_79772210	Yes	29	28	25	19	0	9	6	14	13
chr5_10415600_10417516	Yes	17	8	6	30	22	10	14	0	7
chr5_139819704_139828890	Yes	22	27	27	21	30	55	10	0	19
chr5_167915607_167921655	Yes	81	91	55	42	45	29	12	16	0
chr5_167915607_167924353	Yes	11	20	11	21	25	28	6	8	0
chr5_179132680_179137066	Yes	17	16	16	26	8	13	11	0	8
chr5_61846194_61897675	Yes	30	18	15	0	17	22	4	5	4
chr5_72370569_72373320	Yes	60	49	42	17	0	11	21	5	13
chr5_95099212_95119667	Yes	92	84	78	66	18	58	0	7	9
chr6_151198770_151209117	Yes	8	8	24	10	0	10	17	14	17
chr6_155108995_155114110	Yes	13	14	30	8	11	10	15	0	18
chr6_158850768_158873300	Yes	0	3	5	22	6	12	26	14	25
chr6_160412216_160431817	Yes	18	19	32	16	0	18	5	5	2
chr7_11101418_11151094	Yes	3	3	14	32	5	0	14	13	4
chr7_128214774_128220148	Yes	7	11	17	14	31	11	12	0	5
chr7_140402666_140404763	Yes	32	14	17	17	14	14	12	0	5
chr7_33388680_33427756	Yes	17	26	29	9	14	33	5	0	3
chr7_65705312_65706257	Yes	17	22	6	24	8	23	10	0	6
chr8_6582391_6605349	Yes	72	48	81	7	15	25	12	0	5
chr8_68007528_68007967	Yes	17	13	16	6	3	0	9	4	22
chr9_115336337_115337531	Yes	10	12	9	16	6	13	3	4	0
chr9_140728801_140729540	Yes	51	23	33	19	9	0	22	7	25
chr9_36597219_36607670	Yes	23	14	8	18	5	26	14	0	3
chr9_96238538_96261168	Yes	22	23	17	26	6	13	8	12	0
chr9_98690361_98718295	Yes	34	21	42	30	28	33	5	0	18
chrX_133607389_133632714	Yes	28	22	30	3	9	0	26	29	26
chrX_24839569_24861794	Yes	45	22	21	23	11	0	11	8	11
chr12_6618883_6620418	Yes	8	23	2	11	4	0	13	0	24
chr12_70149164_70150443	Yes	5	4	0	0	20	28	14	17	26
chr16_21350242_21363459	Yes	13	23	21	18	16	0	4	0	6
chr16_68308594_68309152	Yes	4	0	8	11	0	26	17	5	16
chr17_18110129_18111689	Yes	29	12	8	0	28	23	6	0	7
chr2_32515552_32532259	Yes	6	21	4	0	7	26	3	0	3
chr8_25224386_25227157	Yes	14	19	19	16	23	0	3	0	7
chr8_42919244_42932507	Yes	5	37	14	0	18	23	5	0	9
chr8_48192450_48206619	Yes	30	0	21	7	30	25	3	0	15
chr9_20923659_20933102	Yes	26	22	21	18	0	37	16	6	0
chr11_66583524_66590145	Yes	25	24	15	4	3	14	3	13	6
chr11_85961338_85967554	Yes	10	13	3	7	39	9	12	7	1
chr12_28458582_28544344	Yes	100	94	74	1	12	4	16	7	2
chr12_50821545_50822873	Yes	12	13	2	12	12	1	19	15	5
chr12_50824278_50831621	Yes	17	17	9	1	10	15	6	1	7
chr12_69983265_69987393	Yes	2	14	5	4	1	7	15	16	20
chr13_31789188_31803431	Yes	6	4	14	17	21	18	3	8	2
chr13_96409898_96416207	Yes	1	3	4	5	1	17	3	17	19
chr14_105814830_105821514	Yes	46	33	11	3	6	13	13	6	6
chr15_78885434_78885970	Yes	23	31	15	10	9	5	2	13	4
chr15_99250791_99251336	Yes	9	18	11	11	13	1	1	11	8
chr16_14173147_14234617	Yes	10	20	22	4	15	10	2	6	7
chr16_27222467_27226329	Yes	2	5	5	31	8	10	2	12	3
chr16_67662273_67663436	Yes	15	3	5	13	8	5	35	2	6
chr16_88008654_88017865	Yes	7	14	2	20	8	5	5	24	1
chr16_89961446_89967202	Yes	12	3	7	18	42	21	13	3	13
chr17_40652725_40653322	Yes	17	9	3	4	15	9	7	13	12
chr17_41576230_41582193	Yes	7	6	2	28	17	14	3	15	5
chr17_79027468_79031767	Yes	5	10	7	24	18	13	7	10	5
chr18_12999420_13001581	Yes	8	2	5	17	7	15	13	1	4
chr18_12999420_13008630	Yes	8	5	12	10	28	14	5	4	3
chr18_76953183_76974038	Yes	20	24	39	3	9	17	9	5	1
chr1_101379219_101387397	Yes	7	9	6	9	9	5	15	19	9
chr1_12359259_12368698	Yes	6	8	11	37	20	18	10	6	7
chr1_155691308_155695810	Yes	23	13	17	3	9	8	3	13	10
chr1_15860732_15874923	Yes	13	5	11	3	2	45	3	5	4
chr1_97235259_97236407	Yes	17	17	9	1	9	9	3	5	1
chr22_18165980_18185152	Yes	1	4	7	12	22	20	4	6	4
chr22_32874968_32881196	Yes	11	8	12	8	16	4	6	10	2
chr22_41531817_41536261	Yes	10	2	5	1	5	13	10	18	11
chr2_190670378_190682906	Yes	8	5	6	7	4	18	3	14	19
chr2_24787164_24807429	Yes	1	6	3	12	20	24	3	11	8
chr2_32832522_32836649	Yes	10	10	6	13	6	15	7	3	4
chr2_61014082_61019424	Yes	15	5	3	27	10	16	3	8	18
chr2_85595809_85598685	Yes	8	3	11	32	38	54	13	1	7
chr3_10088264_10091189	Yes	13	8	6	1	17	14	8	7	4
chr3_155611307_155624052	Yes	1	10	11	7	14	21	8	2	12
chr3_32774915_32778982	Yes	34	96	58	5	1	19	11	10	5
chr3_57875768_57882659	Yes	16	4	2	8	30	29	24	3	3
chr5_647920_655699	Yes	19	36	22	3	9	2	6	9	8
chr5_80021272_80040434	Yes	17	7	10	1	3	21	2	6	5
chr6_10703638_10705077	Yes	11	14	4	5	7	18	44	26	34
chr6_151336016_151336829	Yes	3	7	6	8	5	11	13	12	18
chr6_158288579_158296208	Yes	9	5	10	3	8	28	10	4	4
chr6_158870028_158873300	Yes	8	8	1	10	4	9	37	12	8
chr6_2779497_2784637	Yes	12	26	4	13	5	2	5	13	8
chr6_57372288_57398317	Yes	60	34	56	13	1	14	10	5	5
chr7_44714010_44715748	Yes	15	7	8	17	8	56	6	7	2
chr7_92932772_92940584	Yes	11	5	5	1	26	29	5	4	10
chr8_27987019_27995408	Yes	13	11	16	4	1	4	5	9	12
chr8_8873832_8877974	Yes	34	25	54	8	2	8	9	7	14
chr9_110062422_110074018	Yes	5	23	6	8	18	2	2	8	8
chr9_97041040_97055351	Yes	10	25	15	9	8	2	6	1	8
chrX_135095117_135098917	Yes	19	17	22	1	10	11	5	3	3
chrX_24197300_24197887	Yes	25	9	23	6	7	4	3	12	6
chr10_115636280_115644139	Yes	6	5	26	3	9	0	7	5	3
chr10_22002701_22016857	Yes	3	5	6	14	17	12	5	0	5
chr10_86177527_86198463	Yes	56	42	14	9	11	4	17	0	8
chr10_94653106_94679807	Yes	2	3	3	28	0	11	3	2	3
chr11_12785726_12815925	Yes	9	3	16	12	7	28	5	0	4
chr11_4123223_4133292	Yes	6	4	2	0	6	30	2	9	3
chr11_755879_760253	Yes	7	5	10	11	13	31	9	5	0
chr11_86778736_86786828	Yes	16	9	10	10	6	0	11	7	3
chr12_124123811_124137282	Yes	19	4	16	3	0	11	5	12	2
chr12_32458631_32459056	Yes	6	1	8	0	14	20	6	14	5
chr13_28840852_28845003	Yes	11	13	4	19	22	19	10	0	7
chr13_50025689_50042096	Yes	0	7	4	4	11	23	5	2	21
chr13_80094945_80113910	Yes	36	40	30	0	3	10	13	6	9
chr14_61278705_61346553	Yes	31	25	8	5	11	0	6	7	9
chr14_76633006_76647192	Yes	21	30	10	10	5	13	8	0	8
chr14_97312432_97327072	Yes	3	12	18	5	5	0	10	5	5
chr14_97409854_97411719	Yes	9	3	9	0	9	36	5	10	7
chr15_63824846_63855207	Yes	17	8	24	7	6	14	0	5	4
chr15_85607601_85610435	Yes	37	22	40	10	0	5	5	5	3
chr15_90760671_90763123	Yes	12	10	7	17	12	8	4	8	0
chr16_16101673_16130460	Yes	22	17	18	3	2	13	7	0	10
chr16_21982846_21987564	Yes	3	5	11	17	0	15	4	2	4
chr16_30715385_30715636	Yes	7	2	8	7	10	36	12	0	3
chr16_67070542_67116211	Yes	7	7	10	15	3	25	0	8	4
chr16_67070542_67116242	Yes	4	4	21	29	12	18	3	4	0
chr17_26449629_26499644	Yes	15	6	3	25	12	36	9	0	4
chr17_54921380_54923170	Yes	4	3	3	6	19	8	4	0	3
chr17_80721841_80730383	Yes	15	1	6	27	15	28	11	8	0
chr18_20814572_20817209	Yes	6	11	6	4	7	0	19	14	14
chr19_4405909_4409756	Yes	4	8	0	14	21	11	4	6	2
chr19_5039847_5041262	Yes	12	11	10	8	19	3	8	5	0
chr1_101372408_101387397	Yes	7	14	2	24	1	20	11	0	6
chr1_150997087_150998149	Yes	11	12	2	0	25	27	5	8	1
chr1_213037067_213046160	Yes	23	21	10	0	3	6	4	7	7
chr1_23376880_23385660	Yes	27	22	14	8	9	7	7	0	7
chr1_246890194_246903603	Yes	39	40	55	2	3	13	0	9	6
chr1_32502511_32504220	Yes	19	13	10	0	10	4	3	8	10
chr1_35846860_35854683	Yes	4	7	7	15	24	0	11	1	6
chr1_40656444_40668286	Yes	18	23	29	15	6	5	4	0	11
chr1_46290105_46295253	Yes	6	3	11	20	52	20	9	0	5
chr1_52211208_52231653	Yes	20	15	36	3	9	14	10	0	11
chr1_6867043_6885270	Yes	21	4	7	13	4	11	13	0	11
chr1_95609447_95616975	Yes	16	31	21	6	4	0	5	3	11
chr20_30380538_30382351	Yes	7	6	11	13	28	29	13	0	7
chr20_35832288_35842268	Yes	2	4	13	19	20	0	15	3	6
chr21_30693542_30693835	Yes	39	22	26	6	7	0	9	11	6
chr22_32874968_32875262	Yes	19	22	25	15	3	9	6	4	0
chr22_41738533_41739580	Yes	14	5	8	23	19	28	11	0	5
chr2_172782047_172809519	Yes	40	48	48	7	4	9	6	0	8
chr2_173433469_173460751	Yes	4	16	3	7	14	11	5	0	9
chr2_208589524_208607066	Yes	5	7	18	8	28	14	7	4	0
chr2_209209835_209212747	Yes	8	6	4	3	1	40	0	6	8
chr3_11399892_11406208	Yes	23	29	23	14	0	11	3	4	5
chr3_124456415_124463050	Yes	7	5	0	2	20	27	1	3	3
chr3_12458203_12458653	Yes	22	22	26	4	0	20	3	4	5
chr3_12616291_12618240	Yes	22	19	4	0	5	7	4	12	6
chr3_130685989_130688240	Yes	11	3	7	0	23	21	8	9	12
chr3_14485132_14489324	Yes	43	24	40	12	10	8	6	0	14
chr3_155637022_155643155	Yes	13	29	16	3	14	0	8	8	3
chr3_172499953_172504364	Yes	4	0	4	14	10	19	6	4	7
chr3_30713130_30715738	Yes	11	26	7	14	3	0	8	5	6
chr3_49547852_49548252	Yes	5	1	5	13	35	9	3	0	6
chr3_50289532_50290616	Yes	21	4	11	15	11	4	20	3	0
chr3_51575514_51624575	Yes	12	13	25	5	5	2	7	0	3
chr3_52446827_52448603	Yes	4	10	4	38	9	39	7	0	12
chr3_93714718_93722752	Yes	13	1	14	28	10	0	5	7	12
chr4_54249940_54266006	Yes	5	3	2	2	15	20	0	11	8
chr5_112321532_112337371	Yes	3	12	0	4	12	53	4	5	7
chr5_134076753_134079742	Yes	15	1	3	4	17	20	6	0	7
chr5_138979957_138994551	Yes	18	1	5	20	18	8	5	0	5
chr5_151169884_151175136	Yes	10	0	5	22	32	56	4	2	12
chr5_179136874_179143295	Yes	3	1	3	25	4	18	7	5	0
chr5_65284463_65310553	Yes	0	122	148	3	12	6	7	14	3
chr5_72374007_72378652	Yes	5	10	17	7	0	8	6	7	4
chr5_80021272_80057497	Yes	34	5	11	6	17	5	3	6	0
chr5_80071513_80109560	Yes	5	4	4	16	4	22	4	0	4
chr6_117010483_117026323	Yes	27	7	36	4	0	6	10	13	4
chr6_42559889_42562042	Yes	13	17	5	0	4	12	3	5	6
chr7_102039995_102047945	Yes	13	15	8	7	7	0	1	6	4
chr7_152480272_152522207	Yes	4	1	13	4	26	0	6	26	5
chr7_157013383_157024021	Yes	22	21	25	0	14	9	6	5	4
chr7_24681335_24690331	Yes	3	8	6	11	18	31	5	5	0
chr7_65592691_65599361	Yes	17	17	17	6	5	0	7	7	12
chr7_77210744_77221573	Yes	7	18	4	12	1	32	3	0	8
chr7_92921015_92940584	Yes	22	3	3	23	16	16	5	5	0
chr8_37623044_37623873	Yes	29	24	17	20	4	0	16	11	3
chr8_68005778_68007967	Yes	13	4	8	13	10	52	3	0	16
chr11_34991686_35006275	Yes	13	7	14	0	4	22	3	0	3
chr12_125587225_125591814	Yes	21	9	13	12	11	0	8	0	6
chr12_19406874_19413955	Yes	18	15	12	10	17	0	8	0	5
chr12_19646734_19653155	Yes	25	18	13	14	9	0	4	0	3
chr12_3103904_3104158	Yes	2	11	8	8	0	27	16	0	9
chr12_50829271_50835426	Yes	5	0	7	8	5	22	10	8	0
chr15_38591574_38617010	Yes	10	5	0	9	30	30	7	6	0
chr15_56686363_56687032	Yes	35	20	23	9	0	3	5	0	5
chr15_64404772_64411053	Yes	5	7	9	0	12	21	7	0	9
chr15_66727365_66729230	Yes	22	34	13	9	11	0	5	0	13
chr15_90984738_90986710	Yes	40	18	13	6	13	0	4	5	0
chr17_28811232_28819771	Yes	10	11	11	0	9	15	4	0	8
chr17_64728806_64738878	Yes	4	0	14	2	14	21	6	0	13
chr18_12999420_13042333	Yes	4	0	8	12	5	0	13	6	17
chr1_44877653_44881895	Yes	3	6	4	14	25	0	4	0	5
chr1_84644860_84680000	Yes	28	26	3	0	7	3	7	12	0
chr1_92798948_92823600	Yes	12	15	21	0	25	5	15	0	7
chr20_2967411_2969120	Yes	9	0	3	19	25	2	4	0	9
chr20_32207323_32216241	Yes	7	0	7	31	14	31	8	0	6
chr20_56993267_57016139	Yes	9	19	3	8	6	0	3	9	0
chr21_45499445_45500008	Yes	3	0	4	33	0	17	4	7	4
chr21_45513944_45518415	Yes	6	15	0	26	3	22	4	3	0
chr2_172305191_172314585	Yes	9	14	8	5	4	0	9	9	0
chr2_228356263_228389631	Yes	88	101	102	10	11	0	7	0	3
chr2_48573340_48573890	Yes	7	0	6	2	18	22	0	15	3
chr3_122842913_122849463	Yes	0	6	3	2	20	9	7	0	6
chr3_169977757_169988349	Yes	1	8	8	0	14	21	9	0	5
chr3_178921332_178922376	Yes	18	13	0	9	0	14	7	1	8
chr3_49016915_49017929	Yes	4	6	22	0	4	8	13	8	0
chr4_76711303_76711950	Yes	6	0	7	8	3	2	12	20	0
chr5_170305101_170308900	Yes	47	34	23	4	0	10	5	12	0
chr6_159026299_159029782	Yes	5	5	0	4	6	0	14	25	4
chr7_155556506_155559349	Yes	6	0	10	12	7	0	10	15	9
chr8_56854414_56860282	Yes	20	15	24	8	4	0	3	0	5
chr9_20819795_20874806	Yes	15	10	15	0	7	5	5	0	9
chr17_35345818_35348156	Yes	11	0	8	34	19	0	6	0	7
chr20_33057853_33080402	Yes	0	6	6	22	31	0	15	9	0
chr22_47370186_47433094	Yes	0	19	14	15	0	15	0	7	4
chr10_51374370_51387763	No	37	42	31	18	12	7	21	23	48
chr12_53410257_53416411	No	21	23	14	13	31	23	28	40	24
chr17_35536201_35538297	No	14	25	19	29	35	55	19	11	5
chr1_145787772_145791170	No	18	19	15	16	30	6	30	30	54
chr1_247039339_247040604	No	44	35	35	19	24	51	25	23	15
chr2_10559860_10560261	No	137	74	130	168	234	250	208	59	95
chr3_58111308_58112489	No	8	13	11	25	37	70	8	3	21
chr5_138145727_138147991	No	18	13	10	21	20	43	18	18	27
chr5_70331372_70333373	No	83	51	106	14	16	25	26	16	52
chr6_117010483_117013555	No	18	16	21	23	2	40	28	5	19
chr6_44081623_44084365	No	97	56	89	90	83	112	125	100	79
chr7_151167657_151188100	No	24	16	36	27	27	31	39	11	6
chr7_152480272_152498816	No	14	13	6	10	13	13	14	29	5
chr7_23224689_23226765	No	15	16	22	3	5	47	13	13	5
chr7_35050080_35058208	No	116	87	122	5	25	41	21	9	18
chr7_72361166_72361649	No	79	98	85	171	188	219	123	123	145
chr8_62593527_62596747	No	798	776	849	116	122	118	98	85	79
chr9_96097656_96098258	No	27	23	10	11	36	38	40	2	39
chr9_96277949_96278551	No	100	46	63	23	58	57	70	26	35
chr13_64576518_64608670	No	21	13	9	15	0	19	34	29	18
chr21_37502934_37503227	No	82	75	71	68	49	23	49	0	43
chr5_170610177_170632616	No	326	9	329	161	195	241	81	0	111
chr13_33222892_33226145	No	20	13	17	21	43	0	0	43	51
chr3_156411811_156413814	No	138	133	122	96	0	147	50	0	62
chr10_70547684_70548085	No	7	6	21	13	10	5	18	41	13
chr16_28394439_28394802	No	5	7	9	2	6	48	20	11	3
chr17_29119457_29120689	No	18	17	3	31	17	28	10	1	8
chr17_49059885_49063139	No	14	9	13	33	15	36	8	9	1
chr2_111302646_111303208	No	12	10	11	26	22	38	4	4	14
chr2_112560005_112563470	No	8	11	9	9	20	41	6	2	24
chr6_158870028_158882761	No	9	7	4	26	16	1	29	10	17
chr7_121011354_121023064	No	24	11	6	49	33	26	12	7	9
chr7_157155855_157160177	No	14	9	22	26	5	7	6	12	7
chr7_6840579_6841154	No	9	5	8	5	12	19	18	16	11
chr7_76739255_76742800	No	13	11	13	12	6	41	10	12	3
chr17_30267305_30300250	No	20	14	7	8	24	7	4	9	0
chr1_145916725_145919047	No	9	7	9	23	8	0	5	14	19
chr1_233270759_233297109	No	31	21	26	11	11	26	13	0	4
chr4_166141086_166184511	No	13	0	5	27	8	25	19	9	12
chr6_74432974_74446231	No	35	48	28	44	13	18	12	0	7
chr7_74157788_74159280	No	13	11	17	51	18	22	4	0	8
chrX_106224121_106228480	No	11	19	34	9	21	2	0	9	7
chr22_43305432_43308162	No	19	16	20	29	36	0	8	7	0
chr11_47857203_47859175	No	18	13	3	8	8	10	12	2	7
chr11_74676079_74680744	No	7	8	1	21	6	10	11	5	9
chr11_76072000_76077016	No	8	7	7	26	8	4	4	17	5
chr12_69044180_69048032	No	7	8	7	11	2	14	5	15	15
chr1_33097428_33100393	No	5	3	6	16	11	9	4	10	6
chr20_30904021_30904677	No	5	7	4	6	4	14	3	21	17
chr6_592468_599224	No	17	12	20	2	13	6	12	5	3
chr7_75103970_75104454	No	4	11	6	27	9	9	3	9	1
chr11_66444139_66444562	No	39	52	59	6	12	0	3	7	1
chr12_104370696_104374740	No	18	24	11	4	4	0	5	7	6
chr12_53410257_53412790	No	9	11	8	20	11	0	7	6	5
chr1_145769408_145791170	No	5	15	16	5	4	7	9	0	11
chr20_32684463_32686439	No	8	10	1	18	3	16	7	0	9
chr20_50290692_50292747	No	5	0	15	34	23	27	6	13	4
chr5_179996110_179998432	No	5	4	1	25	0	14	2	7	5
chr6_150046024_150046328	No	5	9	7	13	1	19	16	13	0
chr8_101232508_101243517	No	15	3	7	10	33	30	9	10	0
chrX_95990757_96018119	No	5	6	0	6	1	3	14	11	10
chr12_123645328_123648637	No	7	5	2	12	0	20	3	6	0
chr1_58971732_59004982	No	15	14	10	6	12	0	4	0	17
chr2_109288781_109289485	No	3	0	4	36	40	12	9	11	0
chr3_4452549_4461830	Yes	0	0	160	28	30	12	7	11	19
chr18_12814202_12836890	Yes	2	6	1	36	24	15	8	14	13
chr1_231081135_231097049	Yes	35	19	25	21	27	16	13	2	2
chr21_40600426_40601362	Yes	35	16	30	31	27	16	10	2	2
chr2_58425729_58459247	Yes	32	47	34	3	1	2	21	11	15
chr3_27453133_27465643	Yes	9	17	23	2	1	4	16	17	14
chr5_118264232_118280344	Yes	74	65	72	9	18	19	2	7	1
chr11_68527037_68529155	Yes	0	2	4	19	5	19	13	12	10
chr13_21305980_21306260	Yes	3	12	29	22	10	13	2	0	10
chr14_91947920_91952074	Yes	54	39	25	18	28	31	2	0	15
chr15_65771218_65772737	Yes	26	5	16	2	6	0	12	8	12
chr17_57089689_57094785	Yes	10	20	10	19	5	11	6	0	1
chr1_1735858_1749314	Yes	28	28	32	0	10	1	19	6	6
chr1_214637973_214638300	Yes	24	18	4	20	33	26	1	0	6
chr1_247302018_247323115	Yes	131	77	98	1	0	9	14	40	25
chr2_122283421_122287901	Yes	18	7	14	2	21	10	2	0	3
chr3_138289160_138290198	Yes	24	31	31	14	10	25	2	6	0
chr6_137015278_137019820	Yes	60	42	23	0	5	1	19	12	10
chr6_146209156_146216113	Yes	67	34	66	16	0	1	36	29	17
chr7_47384353_47385954	Yes	72	44	24	2	5	0	61	48	32
chrX_53672263_53707139	Yes	13	26	19	15	24	34	5	0	2
chrX_53674311_53681075	Yes	9	17	13	1	0	15	15	29	2
chr10_126370176_126370948	Yes	1	0	3	13	27	0	17	24	11
chr10_69751956_69773943	Yes	18	24	17	0	0	31	1	8	9
chr11_63426233_63426724	Yes	25	37	33	30	21	33	3	0	0
chr13_113845186_113854830	Yes	44	25	23	9	0	0	15	18	1
chr14_103470265_103478525	Yes	42	41	65	20	16	39	14	0	0
chr14_50136242_50141145	Yes	21	38	24	0	13	0	13	25	9
chr16_984190_1004666	Yes	14	23	16	0	16	22	15	0	2
chr17_3988964_3989949	Yes	10	22	18	11	4	42	4	0	0
chr1_176132005_176145143	Yes	30	30	33	20	0	14	2	0	12
chr1_197611841_197627499	Yes	44	22	25	0	14	18	21	0	2
chr1_70758071_70781249	Yes	19	18	29	17	9	9	8	0	0
chr1_85816098_85824530	Yes	37	36	36	20	23	12	14	0	0
chr1_94140170_94140497	Yes	32	25	45	26	21	28	0	0	12
chr1_94685814_94697199	Yes	38	29	45	14	31	9	3	0	0
chr22_32134373_32134897	Yes	26	11	47	24	16	0	6	0	1
chr3_15776917_15793327	Yes	23	14	7	13	9	13	6	0	0
chr3_43591212_43607219	Yes	28	20	24	28	11	51	0	0	5
chr5_1057586_1065593	Yes	0	0	6	12	34	39	14	12	10
chr5_130883740_130940386	Yes	21	25	21	12	40	12	0	12	0
chr5_37301539_37303516	Yes	35	11	31	0	5	0	22	19	3
chr7_156516806_156549159	Yes	6	10	15	24	14	4	0	0	5
chr8_141828376_141874498	Yes	28	8	29	30	11	15	7	0	0
chrX_76829715_76851255	Yes	10	16	20	0	0	6	14	17	5
chr10_34558585_34573173	Yes	20	0	15	13	14	19	3	0	0
chr12_124950719_124971114	Yes	24	3	22	32	0	0	3	0	25
chr12_95434252_95443009	Yes	6	13	12	14	18	0	4	0	0
chr22_46829290_46835308	Yes	34	28	9	9	0	27	0	0	5
chr2_24046128_24046439	Yes	8	13	10	0	4	0	21	10	0
chr4_140046318_140060651	Yes	25	44	42	8	0	23	3	0	0
chr5_76745585_76760634	Yes	13	9	11	0	20	14	10	0	0
chr7_151927008_151935911	Yes	0	19	24	1	28	4	0	0	3
chr7_17929986_17937069	Yes	32	29	19	0	0	38	4	0	3
chr11_128910823_128936763	Yes	2	3	2	47	15	40	14	9	2
chr14_50616726_50616948	Yes	8	20	10	13	2	5	1	5	1
chr1_109878862_109888500	Yes	2	10	1	31	1	27	13	6	10
chr1_44713611_44804994	Yes	6	6	10	19	6	17	1	7	2
chr20_3274785_3275275	Yes	1	13	1	21	22	4	12	11	2
chr21_33755731_33757993	Yes	3	2	2	28	5	3	14	11	1
chr3_126360875_126366139	Yes	2	7	4	26	7	26	2	2	4
chr3_47777524_47814426	Yes	10	6	3	1	2	12	9	18	6
chr6_101246589_101253756	Yes	12	13	19	11	1	2	2	21	7
chr9_111812563_111826847	Yes	16	10	12	5	1	2	3	21	4
chr10_116247717_116251637	Yes	8	10	9	11	9	12	0	2	4
chr10_35349802_35360267	Yes	6	4	7	22	17	6	2	0	5
chr11_18536225_18541150	Yes	2	11	2	16	14	14	8	7	0
chr11_31474265_31484852	Yes	5	5	4	2	4	0	30	33	14
chr11_9309249_9316934	Yes	13	19	14	3	1	6	8	0	1
chr12_108136974_108140201	Yes	2	1	7	5	15	27	11	4	0
chr12_11181000_11199787	Yes	31	29	37	1	1	12	3	0	12
chr13_25049610_25052414	Yes	5	2	6	30	11	22	2	6	0
chr13_96622366_96648389	Yes	17	25	35	0	1	8	8	6	7
chr13_96665561_96684225	Yes	27	22	15	4	1	0	6	15	5
chr14_75136352_75138186	Yes	13	18	6	15	0	1	9	5	8
chr16_87376483_87380856	Yes	19	6	15	13	1	0	4	7	3
chr17_57125044_57134415	Yes	6	5	1	19	2	10	0	17	2
chr17_6498292_6503778	Yes	12	11	4	13	19	48	5	0	2
chr17_994905_1003975	Yes	3	1	2	55	29	0	19	7	4
chr1_109884636_109888500	Yes	4	3	1	1	6	32	3	2	0
chr1_1192372_1203372	Yes	9	2	1	0	7	3	25	9	6
chr1_153637696_153641033	Yes	7	1	2	7	20	9	5	5	0
chr1_156303338_156304709	Yes	28	10	9	5	1	0	7	13	1
chr1_160293221_160302347	Yes	22	54	40	7	7	0	3	1	2
chr1_212179981_212194554	Yes	16	12	10	11	0	6	2	6	2
chr1_52289336_52299842	Yes	12	15	23	2	17	0	11	9	6
chr20_45891032_45905539	Yes	3	0	1	8	16	13	3	9	17
chr21_27269885_27284274	Yes	2	5	1	18	17	43	7	5	0
chr21_32537279_32575328	Yes	2	4	21	16	13	35	1	0	4
chr2_128093446_128100770	Yes	11	8	28	12	3	7	1	15	0
chr2_183817133_183818059	Yes	21	10	15	14	5	2	1	0	6
chr2_215617171_215634036	Yes	7	11	13	16	9	0	1	2	6
chr2_37516499_37518142	Yes	3	0	1	22	4	26	5	5	6
chr2_53977920_53992722	Yes	5	4	7	13	10	16	1	0	11
chr3_124560230_124578293	Yes	13	8	4	30	34	16	0	8	1
chr3_196118684_196134264	Yes	2	11	15	4	10	18	2	0	3
chr3_31871532_31921322	Yes	14	10	17	5	17	7	1	12	0
chr4_151719233_151729550	Yes	9	4	9	7	14	14	3	1	0
chr4_36212012_36216102	Yes	33	9	30	6	1	0	7	5	4
chr5_133533467_133541822	Yes	7	1	7	10	5	19	1	0	4
chr5_40728447_40730445	Yes	14	33	38	1	1	11	3	0	6
chr5_76745585_76759051	Yes	28	14	14	20	2	2	3	0	10
chr6_86227474_86239993	Yes	8	15	6	8	20	7	18	0	2
chr6_89479493_89554240	Yes	11	10	1	21	6	11	1	7	0
chr6_90432674_90433338	Yes	1	2	6	5	0	12	3	20	9
chr7_102665510_102669865	Yes	13	0	1	18	13	8	7	2	7
chr7_148529726_148544397	Yes	3	7	22	6	16	7	1	0	3
chr7_35006506_35013217	Yes	14	14	19	5	1	0	9	3	4
chr8_131164982_131181313	Yes	5	9	2	34	48	55	1	8	0
chr8_141874411_141935848	Yes	26	21	5	0	1	4	4	14	7
chr9_114840818_114842445	Yes	16	3	5	14	11	19	1	0	14
chr9_124910391_124914687	Yes	6	9	3	1	11	0	18	14	7
chr9_138741983_138754454	Yes	8	2	24	1	20	0	6	12	1
chr9_33996221_34017187	Yes	11	5	3	12	23	11	1	0	3
chr9_95030456_95032265	Yes	22	7	13	2	11	2	7	0	4
chrX_154018229_154020560	Yes	13	3	8	15	11	9	2	11	0
chr10_120467004_120489922	Yes	11	14	6	3	1	20	4	0	0
chr10_126727566_126811437	Yes	16	7	12	13	5	0	2	0	5
chr10_15875629_15889942	Yes	29	55	42	1	0	8	0	8	4
chr10_51040849_51051678	Yes	8	17	15	6	0	11	1	0	5
chr10_69726440_69773943	Yes	27	36	74	10	14	2	7	0	0
chr11_108046973_108047817	Yes	14	2	5	0	21	0	6	23	7
chr11_17190224_17191353	Yes	12	2	3	12	13	27	0	0	4
chr11_74617284_74618318	Yes	7	1	0	6	15	11	4	4	0
chr12_111991962_111993723	Yes	13	5	7	24	11	46	0	4	0
chr12_11273609_11276922	Yes	7	0	0	9	11	17	11	17	2
chr12_116675273_116675510	Yes	9	15	9	12	8	6	0	3	0
chr12_123798167_123800207	Yes	19	15	6	9	15	0	3	0	1
chr13_95813443_95822882	Yes	10	2	9	8	0	0	24	19	4
chr14_23502577_23502883	Yes	10	7	16	0	15	0	15	8	6
chr14_24735636_24737825	Yes	30	20	20	5	0	9	16	0	1
chr14_55647931_55650471	Yes	3	10	12	5	15	15	3	0	0
chr14_68228083_68229536	Yes	23	26	29	5	3	10	12	0	0
chr14_73459851_73460065	Yes	7	8	5	2	32	0	5	0	3
chr15_43707792_43708614	Yes	27	26	23	9	6	0	11	0	1
chr15_51039692_51041067	Yes	9	0	1	7	7	19	8	5	0
chr15_60734615_60737990	Yes	4	0	2	0	8	28	3	11	5
chr15_62299507_62306191	Yes	19	15	20	0	4	0	11	4	5
chr15_65110145_65111422	Yes	6	13	20	1	7	0	3	0	19
chr15_67519239_67529158	Yes	7	10	1	5	0	0	15	14	17
chr16_249061_270746	Yes	3	8	2	8	14	10	7	0	0
chr16_67719360_67719705	Yes	2	19	0	0	3	16	9	10	17
chr16_71779047_71779517	Yes	5	5	3	0	0	4	12	9	14
chr16_89484692_89497734	Yes	21	18	34	0	3	1	0	11	4
chr17_49294695_49302570	Yes	12	18	24	12	9	9	3	0	0
chr17_526773_565135	Yes	2	3	0	9	19	11	3	0	5
chr19_19407798_19408153	Yes	6	4	1	18	2	15	10	0	0
chr19_2936522_2939405	Yes	0	0	5	25	12	4	13	4	2
chr1_144921835_144922638	Yes	5	0	2	6	14	18	0	7	3
chr1_197564338_197586889	Yes	8	16	7	0	6	6	2	0	5
chr1_224142179_224149975	Yes	27	16	16	12	0	13	14	1	0
chr1_225742608_225755116	Yes	90	80	66	8	1	19	7	0	0
chr1_51001041_51061888	Yes	5	5	6	0	5	0	18	39	23
chr1_51048290_51061888	Yes	12	16	7	8	3	0	13	2	0
chr21_46945731_46957922	Yes	8	1	4	13	0	0	2	21	16
chr22_22160139_22162135	Yes	21	12	11	3	19	0	2	0	8
chr22_41926691_41936799	Yes	24	3	21	0	3	0	12	4	1
chr2_136071059_136103205	Yes	10	2	13	33	0	20	2	3	0
chr2_168869144_168931741	Yes	4	10	5	0	38	7	3	0	2
chr2_240061380_240085619	Yes	0	8	2	7	0	7	6	16	9
chr2_240929491_240954277	Yes	9	12	28	0	4	0	1	4	24
chr2_26453060_26457223	Yes	3	7	1	9	23	16	4	0	0
chr2_61708320_61711240	Yes	9	7	16	4	1	5	0	0	3
chr3_119582266_119624699	Yes	16	18	14	13	6	7	0	9	0
chr3_132431970_132435753	Yes	13	4	4	14	6	22	0	4	0
chr3_15776917_15778740	Yes	8	7	6	23	1	11	0	4	0
chr3_8977555_8983488	Yes	22	22	14	0	16	4	1	0	9
chr4_108603171_108622441	Yes	1	6	0	4	21	40	0	4	4
chr4_140058784_140060651	Yes	42	58	69	8	9	6	0	3	0
chr4_151509200_151512011	Yes	7	5	10	33	50	31	4	0	0
chr4_185637551_185638350	Yes	0	2	4	19	3	0	8	9	16
chr4_186096940_186097205	Yes	7	0	2	14	0	17	2	5	7
chr5_112418557_112421007	Yes	3	5	2	17	17	6	8	0	0
chr5_179688684_179714067	Yes	12	30	13	6	10	4	4	0	0
chr5_37243115_37247847	Yes	15	15	24	3	1	0	4	0	7
chr6_136990421_137019820	Yes	8	15	8	0	3	3	7	0	1
chr6_56564451_56600087	Yes	37	38	39	0	8	0	1	6	7
chr7_16415717_16445962	Yes	7	0	8	28	33	35	1	0	4
chr7_2054137_2108973	Yes	6	0	0	49	12	33	9	5	16
chr9_111795587_111800397	Yes	2	1	10	23	9	0	5	0	6
chr9_134514022_134526336	Yes	4	6	6	18	1	24	0	0	4
chr9_33948372_33953472	Yes	5	3	2	21	9	10	0	7	0
chr10_73887840_73912746	Yes	16	18	20	0	6	14	4	0	0
chr11_78176922_78189729	Yes	12	3	31	6	10	0	4	0	0
chr12_109210814_109217137	Yes	15	6	17	0	9	9	3	0	0
chr12_111947353_111948386	Yes	6	3	0	9	6	17	0	0	6
chr12_112370390_112381173	Yes	7	20	11	0	5	0	5	0	6
chr12_121220458_121229360	Yes	9	24	43	0	4	0	0	14	6
chr12_122745808_122748746	Yes	4	16	0	26	10	18	3	0	0
chr12_56669780_56676775	Yes	9	3	1	0	18	0	8	0	23
chr13_96622366_96651561	Yes	5	11	22	0	0	6	7	0	6
chr14_51259430_51288795	Yes	8	14	6	0	7	25	0	3	0
chr14_81329101_81366373	Yes	19	9	8	4	0	0	0	8	3
chr16_71748415_71748704	Yes	1	23	12	9	3	0	0	16	0
chr16_72651082_72651452	Yes	0	6	0	0	6	23	10	20	17
chr16_87448882_87452507	Yes	4	6	0	11	9	15	0	11	0
chr17_64092369_64128881	Yes	9	0	8	32	17	96	4	0	0
chr18_19116003_19148055	Yes	4	22	29	3	0	0	5	0	6
chr18_9583115_9584826	Yes	5	5	0	4	18	19	10	0	0
chr19_44159591_44160792	Yes	10	4	9	27	0	24	4	0	0
chr19_6262239_6270770	Yes	54	15	21	10	0	0	9	15	0
chr1_169947226_170001116	Yes	40	20	48	11	0	0	10	8	0
chr1_235643370_235658138	Yes	36	23	22	0	6	0	10	4	0
chr1_38332131_38339760	Yes	12	9	16	0	6	0	3	0	6
chr1_94360170_94363454	Yes	21	13	21	0	12	10	8	0	0
chr20_33369924_33380366	Yes	5	9	0	4	21	18	3	0	0
chr20_45923410_45927691	Yes	8	0	4	12	2	40	9	0	0
chr20_50273477_50307358	Yes	3	0	7	12	7	13	5	0	0
chr2_29073194_29084174	Yes	11	11	0	15	5	11	4	0	0
chr2_9727543_9731644	Yes	8	2	21	5	0	0	9	0	7
chr3_124746049_124748332	Yes	20	4	16	0	5	13	0	7	0
chr3_196831774_196857542	Yes	3	4	0	9	33	1	0	4	0
chr4_151656410_151738409	Yes	4	0	9	14	27	13	8	0	0
chr5_176378475_176385155	Yes	0	0	6	4	8	28	4	0	6
chr5_37238959_37239971	Yes	20	17	19	4	4	0	0	0	3
chr5_58284320_58289292	Yes	7	0	5	41	56	58	3	0	0
chr6_84894905_84896341	Yes	17	10	19	0	3	0	8	0	16
chr7_23385559_23391205	Yes	0	5	3	16	13	24	5	0	0
chr8_109240496_109254142	Yes	9	30	9	0	4	0	5	0	3
chr8_124031435_124042956	Yes	6	19	9	0	0	14	3	0	6
chr8_124243540_124243997	Yes	12	8	13	0	4	0	5	0	6
chr8_131226802_131249240	Yes	2	0	5	0	18	20	4	0	3
chr8_141856698_141900868	Yes	20	8	8	0	7	19	6	0	0
chr8_59535779_59555632	Yes	8	4	22	11	8	0	7	0	0
chr9_103065914_103072661	Yes	8	12	0	0	1	14	11	0	24
chr9_86292642_86301070	Yes	7	4	6	0	8	25	0	0	4
chr9_99537070_99538527	Yes	49	13	36	0	25	0	6	0	3
chr15_75706546_75715164	Yes	3	3	0	37	12	0	3	0	0
chr17_73279504_73282883	Yes	3	5	0	0	6	36	0	3	0
chr11_1307232_1317024	Yes	2	1	2	17	20	43	21	8	4
chr13_50279757_50280508	Yes	1	1	0	4	17	22	25	4	9
chr3_98600384_98600611	Yes	0	2	2	40	18	47	7	13	38
chr5_34179118_34182972	Yes	2	1	0	13	24	13	54	48	34
chr7_22999875_23030758	Yes	70	74	70	36	55	60	1	0	2
chr7_23015829_23030758	Yes	15	33	10	38	49	13	1	0	2
chr11_9225207_9229179	Yes	4	14	15	17	14	12	1	0	0
chr17_80914571_80923622	Yes	16	7	23	0	0	2	24	2	7
chr17_982570_1003975	Yes	0	0	1	13	30	35	22	20	36
chr1_21415631_21437876	Yes	36	30	25	17	26	0	2	0	1
chr1_42693554_42744343	Yes	13	4	17	17	5	13	1	0	0
chr1_6007164_6022009	Yes	12	9	18	7	12	12	2	0	0
chr1_78183552_78191447	Yes	37	23	35	14	31	4	0	0	2
chr20_50290692_50307358	Yes	13	3	17	7	52	28	1	0	0
chr3_183056588_183107567	Yes	57	68	65	60	36	30	0	1	0
chr3_56694759_56707753	Yes	21	17	19	29	15	22	2	0	0
chr4_128842679_128861152	Yes	22	15	9	11	14	9	1	0	0
chr4_13426734_13429861	Yes	23	16	14	2	0	0	6	21	6
chr6_111726673_111737675	Yes	42	33	21	4	9	30	1	0	0
chr7_104800954_104809712	Yes	16	13	4	2	18	55	0	1	0
chr7_42187825_42188067	Yes	26	25	30	684	550	709	0	2	0
chr8_131370263_131374017	Yes	19	11	11	117	114	111	1	0	0
chr9_88211277_88248289	Yes	24	16	16	37	15	37	1	0	0
chr11_18010144_18031686	Yes	0	0	0	19	14	24	4	29	12
chr14_68151732_68157138	Yes	17	11	18	14	19	14	0	0	0
chr1_19244856_19246267	Yes	0	0	0	44	47	67	8	20	11
chr1_214625148_214638300	Yes	13	21	6	20	28	1	0	0	0
chr1_247320386_247323115	Yes	18	8	13	0	0	0	16	12	9
chr1_6007164_6012896	Yes	21	8	11	0	0	0	19	6	16
chr3_127800097_127806651	Yes	3	27	10	0	0	0	12	17	6
chr3_195686054_195686957	Yes	0	0	0	83	57	115	33	50	24
chr3_98600384_98609300	Yes	0	0	0	28	35	24	20	24	10
chr3_98600384_98611450	Yes	0	0	0	55	26	9	14	14	7
chr5_111594926_111602027	Yes	29	37	36	30	42	45	0	0	0
chr5_145197457_145205763	Yes	0	0	0	30	29	67	13	41	12
chr7_155295716_155301792	Yes	0	0	0	5	20	9	18	12	22
chr8_131370263_131414216	Yes	13	8	12	43	26	40	0	0	0
chr9_14146688_14179779	Yes	13	16	19	45	22	54	0	0	0
chr2_171538905_171539569	Yes	0	0	0	0	6	43	23	15	27
chr11_3723693_3724122	Yes	5	3	5	9	6	19	1	1	0
chr1_1158624_1159348	Yes	1	0	1	7	10	34	8	6	9
chr1_22074631_22078108	Yes	19	7	5	3	1	7	1	1	0
chr2_45773456_45780869	Yes	4	7	21	6	3	11	1	1	0
chr6_43501644_43516197	Yes	1	2	0	6	19	13	5	5	10
chr7_99090663_99092254	Yes	0	1	1	23	19	12	1	4	3
chr11_61096835_61097546	Yes	23	25	22	0	1	0	10	3	4
chr11_64627396_64627808	Yes	3	4	2	3	11	48	2	0	0
chr12_90049456_90049884	Yes	17	16	7	6	1	11	2	0	0
chr14_35020920_35024118	Yes	23	36	17	0	2	0	3	7	19
chr14_89178615_89181539	Yes	0	2	0	10	27	15	4	6	1
chr14_93412676_93460342	Yes	7	2	4	1	10	29	1	0	0
chr15_50935537_50955243	Yes	26	19	16	1	0	0	5	4	2
chr17_44143903_44159908	Yes	4	12	33	5	3	3	2	0	0
chr17_53478830_53481229	Yes	1	0	2	23	19	11	9	0	5
chr17_62587202_62602758	Yes	7	6	2	50	33	61	2	0	0
chr17_6493099_6503778	Yes	0	2	0	30	10	12	4	2	9
chr19_10602253_10602938	Yes	0	2	0	32	23	13	11	9	1
chr1_231506308_231509845	Yes	8	19	18	15	4	1	1	0	0
chr1_47753223_47761520	Yes	7	5	8	7	13	13	1	0	0
chr1_48821342_48825442	Yes	6	8	4	0	1	0	17	18	14
chr1_6291962_6293703	Yes	3	3	10	0	2	0	30	10	23
chr2_176835492_176860374	Yes	30	37	16	3	4	17	0	2	0
chr2_176844538_176860374	Yes	6	14	18	0	1	0	2	12	4
chr2_20974570_20990158	Yes	5	4	18	10	3	27	1	0	0
chr2_45773871_45780869	Yes	2	5	3	3	16	30	2	0	0
chr2_61721029_61722748	Yes	13	2	5	23	17	0	1	1	0
chr3_169863211_169867032	Yes	23	19	8	1	0	0	5	6	5
chr3_33109722_33110462	Yes	7	31	22	6	2	16	1	0	0
chr6_170033043_170052104	Yes	0	0	1	2	7	7	7	19	5
chr7_137597737_137600758	Yes	14	16	11	0	11	8	2	0	1
chr7_618893_635941	Yes	1	0	0	9	15	15	4	6	11
chr7_635783_647089	Yes	1	0	0	30	18	9	1	7	12
chr7_72193790_72209578	Yes	11	3	7	28	14	45	0	0	2
chr8_141285757_141301177	Yes	0	0	1	24	18	11	7	4	1
chr9_101542471_101544855	Yes	0	1	0	5	16	30	3	16	7
chr9_4286038_4286523	Yes	9	14	2	64	38	27	1	0	0
chrX_14814282_14815420	Yes	35	4	9	1	0	0	6	13	5
chrX_46529042_46541970	Yes	19	1	12	0	15	9	2	2	0
chr10_52103252_52104105	Yes	3	11	21	0	0	0	3	5	4
chr10_61592283_61612460	Yes	13	10	8	0	6	4	2	0	0
chr11_18305342_18308257	Yes	15	10	15	8	19	0	1	0	0
chr11_57258697_57259335	Yes	0	0	2	7	18	0	50	26	31
chr11_78180293_78204241	Yes	18	16	4	12	0	10	2	0	0
chr11_9983504_10011142	Yes	17	17	20	3	1	9	0	0	0
chr13_113170754_113176823	Yes	5	5	8	0	0	0	18	12	5
chr13_25051839_25052414	Yes	7	4	5	37	23	62	0	0	0
chr14_71215546_71216798	Yes	8	16	7	8	9	0	2	0	0
chr14_80971255_80997230	Yes	21	14	27	0	3	12	2	0	0
chr16_11980328_11981607	Yes	2	0	1	21	19	0	10	0	6
chr16_89484692_89493477	Yes	19	10	15	1	0	0	6	0	3
chr17_1540003_1540356	Yes	1	6	12	0	22	10	2	0	0
chr17_70416841_70417207	Yes	0	0	0	9	5	38	5	6	10
chr17_80992911_81006661	Yes	48	31	31	0	0	0	11	3	1
chr19_55756488_55757046	Yes	1	12	5	0	8	44	2	0	0
chr1_214564331_214571344	Yes	10	5	9	6	20	16	0	0	0
chr1_227381487_227400920	Yes	10	12	17	4	0	9	1	0	0
chr1_63944435_63955889	Yes	16	9	21	0	0	0	7	9	1
chr2_11426665_11428575	Yes	17	21	18	7	22	1	0	0	0
chr2_53955849_53978078	Yes	18	5	20	14	3	0	1	0	0
chr2_75745182_75749613	Yes	1	3	3	32	25	19	0	0	0
chr3_119719399_119721086	Yes	16	36	23	5	11	0	2	0	0
chr3_124560230_124567405	Yes	3	9	0	1	18	12	2	0	0
chr3_183097085_183107567	Yes	17	19	25	5	1	8	0	0	0
chr3_195605124_195615477	Yes	1	0	0	12	13	29	7	13	0
chr3_196098767_196129890	Yes	13	25	14	2	14	14	0	0	0
chr4_39900009_39905811	Yes	0	0	1	13	2	24	5	0	8
chr4_39915231_39927553	Yes	23	46	41	0	2	0	21	7	0
chr5_124036707_124036962	Yes	0	0	0	60	138	179	6	5	7
chr5_31431683_31451747	Yes	14	12	12	1	0	0	5	0	9
chr6_129950498_129955250	Yes	5	8	18	0	0	0	4	5	2
chr6_57072426_57075243	Yes	14	20	8	0	1	0	6	0	3
chr7_42187825_42212285	Yes	8	6	6	39	54	49	0	0	0
chr8_17532695_17573410	Yes	14	12	15	1	8	3	0	0	0
chr8_37330596_37333530	Yes	0	0	0	18	1	20	6	6	3
chr9_88284400_88327481	Yes	13	8	25	8	12	0	1	0	0
chr10_518379_532470	Yes	14	14	6	0	0	0	6	0	4
chr10_69785303_69804320	Yes	24	10	18	0	0	0	5	0	3
chr13_99549742_99556960	Yes	0	0	0	12	13	40	4	0	3
chr14_31765115_31771725	Yes	16	8	9	10	0	12	0	0	0
chr14_74981309_74983644	Yes	3	0	4	11	25	33	0	0	0
chr15_100821434_100871259	Yes	0	0	0	63	56	54	3	0	4
chr15_101906401_101910728	Yes	2	0	0	17	0	14	3	18	0
chr16_11647389_11650591	Yes	34	14	16	0	0	0	4	7	0
chr19_44237010_44237885	Yes	3	0	7	8	9	17	0	0	0
chr1_12638746_12640694	Yes	16	0	3	17	12	3	0	0	0
chr1_165648679_165652347	Yes	51	16	39	7	11	0	0	0	0
chr1_197621365_197643299	Yes	16	9	7	0	0	0	8	4	0
chr1_6659107_6659512	Yes	0	0	0	0	7	31	7	1	6
chr2_15534351_15557836	Yes	0	0	0	15	7	14	4	3	0
chr2_78225204_78252550	Yes	23	14	12	0	10	12	0	0	0
chr3_196742236_196744161	Yes	4	4	0	11	16	19	0	0	0
chr5_111570331_111602027	Yes	14	13	5	3	14	0	0	0	0
chr5_34175927_34182972	Yes	45	44	57	0	0	0	16	10	0
chr6_129932678_129939997	Yes	10	9	13	0	0	0	6	20	0
chr6_17669524_17675264	Yes	11	3	5	0	23	10	0	0	0
chr6_17675136_17676001	Yes	15	11	24	0	5	13	0	0	0
chr8_80182258_80201046	Yes	0	0	0	132	112	154	10	0	9
chr9_135172274_135187243	Yes	4	2	7	19	18	0	0	0	0
chr9_14639894_14680160	Yes	0	0	0	6	11	51	10	0	8
chr9_21476898_21477291	Yes	15	9	25	0	12	15	0	0	0
chr9_88190230_88194011	Yes	17	24	17	4	21	0	0	0	0
chrX_154645236_154651369	Yes	8	17	14	9	10	0	0	0	0
chr19_45901263_45901597	Yes	4	0	10	22	0	36	0	0	0
chr3_48810388_48831482	Yes	10	14	0	22	0	13	0	0	0
chr5_131013396_131034695	Yes	12	0	5	0	22	17	0	0	0
chr9_94645540_94649395	Yes	0	4	3	30	10	0	0	0	0
chr6_13579683_13584457	Yes	11	13	8	6	14	14	1	0	32
chr11_119002245_119003929	Yes	2	4	2	56	18	48	13	14	18
chr11_68153784_68157520	Yes	1	5	2	49	56	37	44	17	16
chr17_59152281_59161925	Yes	32	37	31	1	27	29	14	2	1
chr1_36432556_36439112	Yes	6	10	15	10	10	40	1	10	2
chr3_179481790_179483636	Yes	23	20	32	11	18	56	5	2	2
chr8_42914235_42919358	Yes	23	18	20	9	16	6	6	2	1
chr8_48196617_48206619	Yes	34	47	35	21	12	6	1	17	2
chr10_225934_255988	Yes	22	6	23	2	9	0	25	9	15
chr11_66583524_66595835	Yes	8	34	19	44	13	6	3	0	2
chr12_19626182_19653155	Yes	124	106	88	24	2	21	1	0	4
chr13_28830429_28835595	Yes	14	7	11	20	51	18	2	0	3
chr15_49528048_49575915	Yes	6	13	14	26	2	0	10	7	16
chr17_20149239_20163607	Yes	18	8	8	2	14	22	6	0	1
chr17_58700882_58725443	Yes	4	0	1	6	10	29	13	18	5
chr17_61655831_61657304	Yes	15	20	13	7	21	16	11	0	1
chr18_19371335_19383975	Yes	18	20	18	13	12	41	1	0	17
chr19_13135835_13136366	Yes	15	10	19	23	29	49	2	10	0
chr1_40654727_40668286	Yes	24	42	31	18	32	25	4	0	2
chr20_47682729_47683047	Yes	1	0	4	23	13	21	11	17	14
chr21_35475134_35497780	Yes	0	3	2	12	26	12	5	27	3
chr22_24698163_24709434	Yes	17	11	4	5	11	22	2	0	11
chr2_170460152_170471234	Yes	23	5	17	12	19	17	2	0	5
chr2_170728746_170735084	Yes	39	33	20	56	28	22	2	0	9
chr2_184043535_184047408	Yes	11	19	20	0	6	2	19	8	12
chr2_62227836_62228117	Yes	16	13	14	25	15	19	3	0	2
chr3_183361268_183369064	Yes	55	31	36	15	28	87	2	4	0
chr4_128590191_128609022	Yes	31	43	37	19	2	0	18	6	13
chr5_112889464_112899189	Yes	6	2	2	0	23	9	8	16	10
chr5_134388144_134411078	Yes	27	32	33	7	19	15	6	1	0
chr5_137733867_137735701	Yes	16	12	18	21	25	22	2	3	0
chr5_353845_376831	Yes	0	1	6	33	51	14	291	269	222
chr7_155471302_155473602	Yes	19	22	11	0	2	18	1	15	20
chr7_30395344_30405911	Yes	47	65	75	26	39	39	1	0	4
chr7_98988516_98988876	Yes	5	0	1	32	28	8	18	9	5
chr8_6582391_6590171	Yes	19	9	29	1	0	10	11	3	20
chr9_134312007_134314448	Yes	28	5	16	43	13	1	2	0	12
chr9_22046750_22056386	Yes	31	41	50	31	18	6	5	0	1
chr9_22046750_22097363	Yes	12	18	20	7	10	14	2	0	6
chrX_77270159_77275895	Yes	15	19	8	0	1	17	15	11	13
chr10_4872867_4884696	Yes	0	3	0	23	21	3	9	25	46
chr11_108098322_108106561	Yes	5	0	0	15	8	9	32	19	15
chr11_36103203_36120011	Yes	29	27	17	19	17	25	4	0	0
chr11_66407149_66407594	Yes	54	35	49	10	0	0	15	2	19
chr12_111855923_111856681	Yes	3	0	0	29	37	4	28	14	8
chr12_22811948_22826594	Yes	21	20	19	3	0	0	21	23	14
chr13_61013822_61034674	Yes	15	30	6	0	10	0	19	11	14
chr14_103865288_103871604	Yes	46	34	25	0	22	0	18	36	16
chr15_92459223_92459688	Yes	42	22	30	7	14	15	5	0	0
chr16_16101673_16108485	Yes	19	17	10	0	3	0	5	14	15
chr16_21623966_21636436	Yes	27	36	15	23	17	33	3	0	0
chr16_22236975_22237296	Yes	14	16	2	1	35	0	4	4	0
chr1_16044388_16047883	Yes	25	13	18	24	39	50	11	0	0
chr1_193202123_193205486	Yes	22	29	25	0	4	0	16	18	6
chr1_225195115_225284941	Yes	19	40	17	4	0	0	17	4	10
chr1_94953098_94956803	Yes	26	31	19	0	12	0	12	11	23
chr2_153431650_153437563	Yes	78	79	58	16	0	0	32	53	26
chr4_123091770_123097069	Yes	2	17	15	12	9	27	3	0	0
chr5_108281831_108295048	Yes	51	83	63	22	1	15	11	0	0
chr5_112868576_112871495	Yes	15	18	23	5	23	9	4	0	0
chr5_14330887_14336836	Yes	30	33	0	20	9	11	2	0	4
chr5_170305101_170319557	Yes	26	4	13	13	0	36	1	0	6
chr5_170585338_170597207	Yes	15	20	13	19	13	16	0	0	3
chr6_158317859_158331057	Yes	3	0	0	27	28	34	12	18	12
chr8_29959414_29962002	Yes	4	18	14	0	0	6	14	9	14
chr8_42761316_42798588	Yes	7	17	9	17	17	0	2	0	7
chr9_108467878_108484902	Yes	18	16	11	9	6	16	7	0	0
chr9_79852918_79853302	Yes	29	8	17	11	0	0	28	41	30
chr14_102506573_102507010	Yes	21	10	31	0	22	24	0	0	5
chr20_57009658_57016139	Yes	28	11	25	32	7	0	8	0	0
chr2_162223989_162251714	Yes	11	5	18	0	20	12	9	0	0
chr3_67797195_67801084	Yes	10	6	17	8	0	41	5	0	0
chr9_108483818_108484902	Yes	25	39	12	0	0	33	3	9	0
chr11_120347370_120348235	Yes	1	1	7	9	13	9	11	7	10
chr14_71880665_71933964	Yes	35	23	40	3	7	13	2	6	2
chr17_80828100_80869665	Yes	10	2	2	25	5	27	8	8	3
chr1_114214356_114216087	Yes	4	8	8	1	1	19	8	10	18
chr20_25612794_25626284	Yes	11	4	13	27	16	7	2	1	5
chr2_236658998_236715975	Yes	7	1	1	7	22	8	1	4	5
chr5_14673751_14681716	Yes	16	11	19	2	1	6	4	11	4
chr5_79974746_80040434	Yes	34	24	26	1	2	14	5	3	14
chr7_129760589_129762042	Yes	9	9	12	1	24	1	12	11	12
chr7_38247048_38259261	Yes	2	6	1	30	14	8	3	5	5
chr8_38947566_38948865	Yes	27	17	13	7	6	1	1	2	8
chr10_126176991_126186697	Yes	71	35	45	1	3	0	11	11	8
chr10_49609655_49613024	Yes	22	9	23	1	15	0	8	1	6
chr10_5751493_5754881	Yes	12	0	4	19	2	38	2	9	1
chr10_70723047_70726959	Yes	5	8	12	9	2	0	15	15	31
chr10_72604230_72619256	Yes	16	21	23	0	10	10	1	1	3
chr11_118454524_118455359	Yes	2	8	0	8	24	22	9	4	13
chr11_44146339_44151688	Yes	0	1	4	13	4	46	2	6	3
chr11_85966264_85967554	Yes	23	12	21	0	1	7	3	3	4
chr11_86778736_86802437	Yes	23	34	16	2	0	7	8	11	10
chr12_124130002_124137282	Yes	15	24	15	5	0	6	9	2	2
chr12_13061177_13062105	Yes	9	4	15	17	16	19	1	0	3
chr12_27786295_27788048	Yes	4	1	6	29	8	4	2	3	0
chr12_32866143_32875567	Yes	14	10	22	10	8	7	2	0	9
chr13_20576990_20580726	Yes	16	11	4	0	13	2	9	13	4
chr13_46090278_46099186	Yes	7	5	5	18	13	26	10	0	1
chr17_27809215_27818883	Yes	14	5	8	23	7	10	4	0	1
chr17_41576230_41577471	Yes	4	8	4	8	19	11	3	0	1
chr17_58756814_58824640	Yes	9	21	18	17	6	0	7	2	1
chr17_80847544_80869665	Yes	2	3	0	10	19	11	4	9	5
chr18_21644104_21663045	Yes	10	12	12	4	16	7	1	0	8
chr19_18258253_18258434	Yes	3	2	2	9	4	0	14	9	8
chr19_41782064_41787180	Yes	9	3	2	1	19	22	3	0	2
chr1_212502477_212506940	Yes	51	40	65	9	11	5	1	0	17
chr1_225140372_225161855	Yes	7	8	11	3	2	0	13	6	29
[truncated: 934 more rows]
