# Supplementary material for: Docker4Circ: A Framework for the Reproducible Characterization of circRNAs from RNA-Seq Data
Source: Int J Mol Sci. 2019 Dec 31;21(1):293. doi: 10.3390/ijms21010293 (PMC6982331; doi:10.3390/ijms21010293)
Supplement: Supplementary file 1 [file ijms-21-00293-s001.zip › Supplementary_Table_4_Docker4Circ_circRNAs_Classification.xlsx]

## Sheet: Univocal_classification
ID	Class	Isoform_ID	Isoform_Rank	Ensembl_Gene_ID_1	Ensembl_Trnascript_ID_1	Ensembl_Exon_ID_1	Exon_rank_1	strand_1	Ensembl_Gene_ID_2	Ensembl_Trnascript_ID_2	Ensembl_Exon_ID_2	Exon_rank_2	strand_2
chr10_101657843_101659823	multiexon	DNMBP-001	1	ENSG00000107554	ENST00000324109	ENSE00001121895	7	-	ENSG00000107554	ENST00000324109	ENSE00002702159	9	-
chr10_102019975_102021820	multiexon	CWF19L1-005	5	ENSG00000095485	ENST00000468709	ENSE00003462255	2	-	ENSG00000095485	ENST00000468709	ENSE00003655465	4	-
chr10_102697159_102703885	multiexon	FAM178A-001	1	ENSG00000119906	ENST00000238961	ENSE00000721367	10	+	ENSG00000119906	ENST00000238961	ENSE00000721383	12	+
chr10_102697159_102710510	multiexon	FAM178A-001	1	ENSG00000119906	ENST00000238961	ENSE00000721367	10	+	ENSG00000119906	ENST00000238961	ENSE00000721394	17	+
chr10_103384502_103436193	multiexon	FBXW4-001	1	ENSG00000107829	ENST00000331272	ENSE00003637643	2	-	ENSG00000107829	ENST00000331272	ENSE00002290987	6	-
chr10_103427643_103436193	multiexon	FBXW4-001	1	ENSG00000107829	ENST00000331272	ENSE00003637643	2	-	ENSG00000107829	ENST00000331272	ENSE00003678265	5	-
chr10_103432672_103436193	multiexon	FBXW4-001	1	ENSG00000107829	ENST00000331272	ENSE00003637643	2	-	ENSG00000107829	ENST00000331272	ENSE00003541215	4	-
chr10_103649169_103717489	multiexon	C10orf76-001	1	ENSG00000120029	ENST00000370033	ENSE00002443701	21	-	ENSG00000120029	ENST00000370033	ENSE00002481958	24	-
chr10_103699620_103717489	multiexon	C10orf76-001	1	ENSG00000120029	ENST00000370033	ENSE00002443701	21	-	ENSG00000120029	ENST00000370033	ENSE00002503095	23	-
chr10_103783234_103789502	multiexon	C10orf76-001	1	ENSG00000120029	ENST00000370033	ENSE00001451572	5	-	ENSG00000120029	ENST00000370033	ENSE00001451569	8	-
chr10_104018686_104019873	multiexon	GBF1-001	1	ENSG00000107862	ENST00000369983	ENSE00001451422	2	+	ENSG00000107862	ENST00000369983	ENSE00001100976	3	+
chr10_104018686_104044827	intronic	GBF1-001	1
chr10_104018686_104103939	multiexon	GBF1-001	1	ENSG00000107862	ENST00000369983	ENSE00001451422	2	+	ENSG00000107862	ENST00000369983	ENSE00000722583	4	+
chr10_104117796_104119192	multiexon	GBF1-001	1	ENSG00000107862	ENST00000369983	ENSE00000722599	9	+	ENSG00000107862	ENST00000369983	ENSE00000811505	11	+
chr10_104119941_104120152	monoexon	GBF1-001	1	ENSG00000107862	ENST00000369983	ENSE00000722612	12	+
chr10_1046617_1053068	multiexon	GTPBP4-001	1	ENSG00000107937	ENST00000360803	ENSE00003613229	7	+	ENSG00000107937	ENST00000360803	ENSE00003628701	10	+
chr10_104809464_104816721	multiexon	CNNM2-001	1	ENSG00000148842	ENST00000369878	ENSE00002517953	2	+	ENSG00000148842	ENST00000369878	ENSE00001806333	4	+
chr10_105106995_105108756	multiexon	PCGF6-001	1	ENSG00000156374	ENST00000369847	ENSE00003590449	2	-	ENSG00000156374	ENST00000369847	ENSE00001281861	5	-
chr10_105197772_105198565	multiexon	PDCD11-001	1	ENSG00000148843	ENST00000369797	ENSE00001026012	26	+	ENSG00000148843	ENST00000369797	ENSE00001026008	27	+
chr10_105750433_105752891	multiexon	SLK-001	1	ENSG00000065613	ENST00000335753	ENSE00001271743	2	+	ENSG00000065613	ENST00000335753	ENSE00000515225	4	+
chr10_106019334_106022835	multiexon	GSTO1-001	1	ENSG00000148834	ENST00000369713	ENSE00003463081	3	+	ENSG00000148834	ENST00000369713	ENSE00003577111	4	+
chr10_112262479_112266912	multiexon	DUSP5-001	1	ENSG00000138166	ENST00000369583	ENSE00003317820	2	+	ENSG00000138166	ENST00000369583	ENSE00003597252	3	+
chr10_1125951_1126416	multiexon	WDR37-001	1	ENSG00000047056	ENST00000358220	ENSE00000984847	4	+	ENSG00000047056	ENST00000358220	ENSE00000984849	5	+
chr10_1130343_1142186	multiexon	WDR37-001	1	ENSG00000047056	ENST00000358220	ENSE00000984852	6	+	ENSG00000047056	ENST00000358220	ENSE00003530924	9	+
chr10_1130343_1151207	multiexon	WDR37-001	1	ENSG00000047056	ENST00000358220	ENSE00000984852	6	+	ENSG00000047056	ENST00000358220	ENSE00001094546	11	+
chr10_114220283_114224416	multiexon	VTI1A-001	1	ENSG00000151532	ENST00000393077	ENSE00003578306	2	+	ENSG00000151532	ENST00000393077	ENSE00003649011	3	+
chr10_114286846_114298089	multiexon	VTI1A-001	1	ENSG00000151532	ENST00000393077	ENSE00003510762	4	+	ENSG00000151532	ENST00000393077	ENSE00001685704	5	+
chr10_114648494_114665972	intergenic	RP11-57H14.3-001	1
chr10_114799784_114849299	multiexon	TCF7L2-001	1	ENSG00000148737	ENST00000369395	ENSE00003683398	4	+	ENSG00000148737	ENST00000369395	ENSE00001449946	5	+
chr10_11523769_11527910	multiexon	USP6NL-001	1	ENSG00000148429	ENST00000609104	ENSE00000999688	11	-	ENSG00000148429	ENST00000609104	ENSE00001094541	14	-
chr10_11551594_11569566	multiexon	USP6NL-001	1	ENSG00000148429	ENST00000609104	ENSE00001166660	3	-	ENSG00000148429	ENST00000609104	ENSE00000985239	6	-
chr10_115636280_115644139	multiexon	NHLRC2-001	1	ENSG00000196865	ENST00000369301	ENSE00001169553	3	+	ENSG00000196865	ENST00000369301	ENSE00001169534	5	+
chr10_116091562_116093054	multiexon	AFAP1L2-001	1	ENSG00000169129	ENST00000369271	ENSE00003594120	3	-	ENSG00000169129	ENST00000369271	ENSE00003485655	4	-
chr10_116247717_116251637	multiexon	ABLIM1-001	1	ENSG00000099204	ENST00000277895	ENSE00003480415	7	-	ENSG00000099204	ENST00000277895	ENSE00000933333	8	-
chr10_11639630_11643979	intronic	USP6NL-001	1
chr10_116719485_116734144	multiexon	TRUB1-001	1	ENSG00000165832	ENST00000298746	ENSE00001097026	4	+	ENSG00000165832	ENST00000298746	ENSE00001131261	7	+
chr10_116879949_116889297	multiexon	ATRNL1-001	1	ENSG00000107518	ENST00000355044	ENSE00003516399	2	+	ENSG00000107518	ENST00000355044	ENSE00003590347	5	+
chr10_116879949_116925405	multiexon	ATRNL1-001	1	ENSG00000107518	ENST00000355044	ENSE00003516399	2	+	ENSG00000107518	ENST00000355044	ENSE00003653411	7	+
chr10_116879949_116931050	multiexon	ATRNL1-001	1	ENSG00000107518	ENST00000355044	ENSE00003516399	2	+	ENSG00000107518	ENST00000355044	ENSE00001769012	8	+
chr10_116879949_116975638	multiexon	ATRNL1-001	1	ENSG00000107518	ENST00000355044	ENSE00003516399	2	+	ENSG00000107518	ENST00000355044	ENSE00003559078	9	+
chr10_11789348_11797607	multiexon	ECHDC3-001	1	ENSG00000134463	ENST00000379215	ENSE00003503352	2	+	ENSG00000134463	ENST00000379215	ENSE00003592776	4	+
chr10_11893996_11894214	monoexon	PROSER2-003	3	ENSG00000148426	ENST00000444604	ENSE00003546514	2	+
chr10_12039671_12056183	multiexon	UPF2-001	1	ENSG00000151461	ENST00000356352	ENSE00001349465	3	-	ENSG00000151461	ENST00000356352	ENSE00001754391	7	-
chr10_120460818_120489922	multiexon	CACUL1-001	1	ENSG00000151893	ENST00000369151	ENSE00003607724	2	-	ENSG00000151893	ENST00000369151	ENSE00003474443	5	-
chr10_120467004_120489922	multiexon	CACUL1-001	1	ENSG00000151893	ENST00000369151	ENSE00003607724	2	-	ENSG00000151893	ENST00000369151	ENSE00003678955	4	-
chr10_120488807_120489922	multiexon	CACUL1-001	1	ENSG00000151893	ENST00000369151	ENSE00003607724	2	-	ENSG00000151893	ENST00000369151	ENSE00001002298	3	-
chr10_120828958_120830597	multiexon	EIF3A-001	1	ENSG00000107581	ENST00000369144	ENSE00000987843	5	-	ENSG00000107581	ENST00000369144	ENSE00000987844	6	-
chr10_12123471_12126750	multiexon	DHTKD1-001	1	ENSG00000181192	ENST00000263035	ENSE00000690695	2	+	ENSG00000181192	ENST00000263035	ENSE00000690693	3	+
chr10_12123471_12133683	multiexon	DHTKD1-001	1	ENSG00000181192	ENST00000263035	ENSE00000690695	2	+	ENSG00000181192	ENST00000263035	ENSE00000915146	6	+
chr10_121338238_121347760	multiexon	TIAL1-005	5	ENSG00000151923	ENST00000369093	ENSE00003587021	2	-	ENSG00000151923	ENST00000369093	ENSE00003603603	7	-
chr10_12160748_12162266	multiexon	DHTKD1-001	1	ENSG00000181192	ENST00000263035	ENSE00000985264	15	+	ENSG00000181192	ENST00000263035	ENSE00000985265	16	+
chr10_121663596_121668642	multiexon	SEC23IP-001	1	ENSG00000107651	ENST00000369075	ENSE00000987867	4	+	ENSG00000107651	ENST00000369075	ENSE00000726508	5	+
chr10_12251966_12259466	multiexon	CDC123-001	1	ENSG00000151465	ENST00000281141	ENSE00003466501	3	+	ENSG00000151465	ENST00000281141	ENSE00003651605	6	+
chr10_12257739_12280484	multiexon	CDC123-001	1	ENSG00000151465	ENST00000281141	ENSE00003630299	5	+	ENSG00000151465	ENST00000281141	ENSE00003596966	10	+
chr10_12272947_12280484	multiexon	CDC123-001	1	ENSG00000151465	ENST00000281141	ENSE00003529375	7	+	ENSG00000151465	ENST00000281141	ENSE00003596966	10	+
chr10_12291580_12292468	putativeexon	CDC123-001	1	ENSG00000151465	ENST00000281141	ENSE00003581074	12	+	ENSG00000151465	ENST00000281141	ENSE00001156150	13	+
chr10_123549684_123629553	multiexon	ATE1-001	1	ENSG00000107669	ENST00000369043	ENSE00003464821	8	-	ENSG00000107669	ENST00000369043	ENSE00001775830	11	-
chr10_123670421_123683844	multiexon	ATE1-001	1	ENSG00000107669	ENST00000369043	ENSE00003512370	2	-	ENSG00000107669	ENST00000369043	ENSE00003686076	5	-
chr10_123718839_123721032	multiexon	NSMCE4A-005	5	ENSG00000107672	ENST00000369023	ENSE00003675958	7	-	ENSG00000107672	ENST00000369023	ENSE00003495026	10	-
chr10_124151819_124184475	multiexon	PLEKHA1-004	4	ENSG00000107679	ENST00000392799	ENSE00002268959	2	+	ENSG00000107679	ENST00000392799	ENSE00003397141	11	+
chr10_12442015_12445368	intronic	CAMK1D-001	1
chr10_12442720_12445368	intronic	CAMK1D-001	1
chr10_126097111_126100769	multiexon	OAT-001	1	ENSG00000065154	ENST00000368845	ENSE00003659414	2	-	ENSG00000065154	ENST00000368845	ENSE00003466621	4	-
chr10_126172708_126177144	multiexon	LHPP-001	1	ENSG00000107902	ENST00000368842	ENSE00000903909	2	+	ENSG00000107902	ENST00000368842	ENSE00000903910	3	+
chr10_126172708_126186697	multiexon	LHPP-001	1	ENSG00000107902	ENST00000368842	ENSE00000903909	2	+	ENSG00000107902	ENST00000368842	ENSE00003491478	5	+
chr10_126176991_126186697	multiexon	LHPP-001	1	ENSG00000107902	ENST00000368842	ENSE00000903910	3	+	ENSG00000107902	ENST00000368842	ENSE00003491478	5	+
chr10_126185530_126205840	multiexon	LHPP-001	1	ENSG00000107902	ENST00000368842	ENSE00003648455	4	+	ENSG00000107902	ENST00000368842	ENSE00000903913	6	+
chr10_126370176_126370948	monoexon	FAM53B-001	1	ENSG00000189319	ENST00000337318	ENSE00003542605	4	-
chr10_126370176_126370948	monoexon	RP11-12J10.3-001	1	ENSG00000258539	ENST00000494792	ENSE00003511468	9	-
chr10_126370176_126384781	multiexon	FAM53B-001	1	ENSG00000189319	ENST00000337318	ENSE00003562098	3	-	ENSG00000189319	ENST00000337318	ENSE00003542605	4	-
chr10_126370176_126384781	multiexon	RP11-12J10.3-001	1	ENSG00000258539	ENST00000494792	ENSE00003498030	8	-	ENSG00000258539	ENST00000494792	ENSE00003511468	9	-
chr10_126370176_126395456	multiexon	FAM53B-001	1	ENSG00000189319	ENST00000337318	ENSE00003607391	2	-	ENSG00000189319	ENST00000337318	ENSE00003542605	4	-
chr10_126370176_126395456	multiexon	RP11-12J10.3-001	1	ENSG00000258539	ENST00000494792	ENSE00003469183	7	-	ENSG00000258539	ENST00000494792	ENSE00003511468	9	-
chr10_126463244_126478907	multiexon	METTL10-001	1	ENSG00000203791	ENST00000368836	ENSE00003622947	2	-	ENSG00000203791	ENST00000368836	ENSE00003587138	4	-
chr10_126463244_126478907	multiexon	RP11-12J10.3-001	1	ENSG00000258539	ENST00000494792	ENSE00003651785	2	-	ENSG00000258539	ENST00000494792	ENSE00003470484	4	-
chr10_126631026_126631876	putativeexon	ZRANB1-001	1	ENSG00000019995	ENST00000359653	ENSE00001448061	1	+
chr10_126727566_126799662	multiexon	CTBP2-001	1	ENSG00000175029	ENST00000337195	ENSE00001191586	2	-	ENSG00000175029	ENST00000337195	ENSE00003563320	3	-
chr10_126727566_126811437	intronic	CTBP2-001	1
chr10_126727566_126822181	multiexon	CTBP2-002	2	ENSG00000175029	ENST00000494626	ENSE00001848918	2	-	ENSG00000175029	ENST00000494626	ENSE00003563320	3	-
chr10_126763312_126799662	intronic	CTBP2-001	1
chr10_126776760_126811437	intronic	CTBP2-001	1
chr10_126799559_126811437	intronic	CTBP2-001	1
chr10_12802947_12811798	multiexon	CAMK1D-001	1	ENSG00000183049	ENST00000378847	ENSE00001763642	4	+	ENSG00000183049	ENST00000378847	ENSE00001294036	5	+
chr10_12856194_12858327	multiexon	CAMK1D-001	1	ENSG00000183049	ENST00000378847	ENSE00001707369	7	+	ENSG00000183049	ENST00000378847	ENSE00001316120	8	+
chr10_128768966_128788867	multiexon	DOCK1-001	1	ENSG00000150760	ENST00000280333	ENSE00001338098	2	+	ENSG00000150760	ENST00000280333	ENSE00000987395	6	+
chr10_128768966_128798571	multiexon	DOCK1-001	1	ENSG00000150760	ENST00000280333	ENSE00001338098	2	+	ENSG00000150760	ENST00000280333	ENSE00000987399	10	+
chr10_128859932_128908618	multiexon	DOCK1-001	1	ENSG00000150760	ENST00000280333	ENSE00000987411	23	+	ENSG00000150760	ENST00000280333	ENSE00001190649	25	+
chr10_128859932_128926028	multiexon	DOCK1-001	1	ENSG00000150760	ENST00000280333	ENSE00000987411	23	+	ENSG00000150760	ENST00000280333	ENSE00000996152	27	+
chr10_128923738_128926028	multiexon	DOCK1-001	1	ENSG00000150760	ENST00000280333	ENSE00003521287	26	+	ENSG00000150760	ENST00000280333	ENSE00000996152	27	+
chr10_131943475_131959261	multiexon	GLRX3-001	1	ENSG00000108010	ENST00000331244	ENSE00000728668	2	+	ENSG00000108010	ENST00000331244	ENSE00000728676	4	+
chr10_131964771_131969900	multiexon	GLRX3-001	1	ENSG00000108010	ENST00000331244	ENSE00000728678	5	+	ENSG00000108010	ENST00000331244	ENSE00000728687	8	+
chr10_134218130_134219793	monoexon	PWWP2B-001	1	ENSG00000171813	ENST00000305233	ENSE00001676363	2	+
chr10_134421419_134464009	multiexon	INPP5A-001	1	ENSG00000068383	ENST00000368594	ENSE00002526055	2	+	ENSG00000068383	ENST00000368594	ENSE00002480332	4	+
chr10_134421419_134511423	multiexon	INPP5A-001	1	ENSG00000068383	ENST00000368594	ENSE00002526055	2	+	ENSG00000068383	ENST00000368594	ENSE00003467863	6	+
chr10_134421419_134523960	multiexon	INPP5A-001	1	ENSG00000068383	ENST00000368594	ENSE00002526055	2	+	ENSG00000068383	ENST00000368594	ENSE00003570086	8	+
chr10_134503896_134523960	multiexon	INPP5A-001	1	ENSG00000068383	ENST00000368594	ENSE00003610705	5	+	ENSG00000068383	ENST00000368594	ENSE00003570086	8	+
chr10_134503896_134540409	multiexon	INPP5A-001	1	ENSG00000068383	ENST00000368594	ENSE00003610705	5	+	ENSG00000068383	ENST00000368594	ENSE00003470647	9	+
chr10_135209217_135216277	multiexon	MTG1-001	1	ENSG00000148824	ENST00000317502	ENSE00003668382	2	+	ENSG00000148824	ENST00000317502	ENSE00003698138	9	+
chr10_135209217_135216277	multiexon	RP11-108K14.8-001	1	ENSG00000254536	ENST00000468317	ENSE00003563182	3	+	ENSG00000254536	ENST00000468317	ENSE00003615494	10	+
chr10_15290638_15326104	multiexon	FAM171A1-001	1	ENSG00000148468	ENST00000378116	ENSE00001164671	2	-	ENSG00000148468	ENST00000378116	ENSE00003488355	5	-
chr10_15317854_15326104	multiexon	FAM171A1-001	1	ENSG00000148468	ENST00000378116	ENSE00001164671	2	-	ENSG00000148468	ENST00000378116	ENSE00001164666	3	-
chr10_15838099_15889942	multiexon	FAM188A-001	1	ENSG00000148481	ENST00000277632	ENSE00003667571	2	-	ENSG00000148481	ENST00000277632	ENSE00003537348	11	-
chr10_15858834_15885271	multiexon	FAM188A-001	1	ENSG00000148481	ENST00000277632	ENSE00003688029	3	-	ENSG00000148481	ENST00000277632	ENSE00003638576	10	-
chr10_15858834_15889942	multiexon	FAM188A-001	1	ENSG00000148481	ENST00000277632	ENSE00003667571	2	-	ENSG00000148481	ENST00000277632	ENSE00003638576	10	-
chr10_15875629_15889942	multiexon	FAM188A-001	1	ENSG00000148481	ENST00000277632	ENSE00003667571	2	-	ENSG00000148481	ENST00000277632	ENSE00003527786	8	-
chr10_16794538_16824083	multiexon	RSU1-001	1	ENSG00000148484	ENST00000345264	ENSE00003581063	3	-	ENSG00000148484	ENST00000345264	ENSE00003527614	7	-
chr10_17199440_17210916	multiexon	TRDMT1-001	1	ENSG00000107614	ENST00000377799	ENSE00003590387	3	-	ENSG00000107614	ENST00000377799	ENSE00003671036	8	-
chr10_17636204_17646046	multiexon	PTPLA-001	1	ENSG00000165996	ENST00000361271	ENSE00002529135	2	-	ENSG00000165996	ENST00000361271	ENSE00003688862	6	-
chr10_17645559_17646046	multiexon	PTPLA-001	1	ENSG00000165996	ENST00000361271	ENSE00002529135	2	-	ENSG00000165996	ENST00000361271	ENSE00002467042	4	-
chr10_17746430_17747740	multiexon	STAM-001	1	ENSG00000136738	ENST00000377524	ENSE00002489468	10	+	ENSG00000136738	ENST00000377524	ENSE00002476979	12	+
chr10_18955504_18957606	multiexon	ARL5B-001	1	ENSG00000165997	ENST00000377275	ENSE00001713306	2	+	ENSG00000165997	ENST00000377275	ENSE00001098821	3	+
chr10_21246660_21250708	intronic	NEBL-003	3
chr10_21903760_21940697	multiexon	MLLT10-001	1	ENSG00000078403	ENST00000377072	ENSE00000693489	7	+	ENSG00000078403	ENST00000377072	ENSE00000693508	9	+
chr10_21970261_22002879	multiexon	MLLT10-001	1	ENSG00000078403	ENST00000377072	ENSE00000816097	12	+	ENSG00000078403	ENST00000377072	ENSE00002239963	15	+
chr10_22002701_22016857	multiexon	MLLT10-001	1	ENSG00000078403	ENST00000377072	ENSE00002239963	15	+	ENSG00000078403	ENST00000377072	ENSE00001803822	17	+
chr10_225934_255988	multiexon	ZMYND11-001	1	ENSG00000015171	ENST00000381584	ENSE00003575257	1	+	ENSG00000015171	ENST00000381584	ENSE00003547438	3	+
chr10_225934_267296	multiexon	ZMYND11-001	1	ENSG00000015171	ENST00000381584	ENSE00003575257	1	+	ENSG00000015171	ENST00000381584	ENSE00003288785	4	+
chr10_24918925_24924032	multiexon	ARHGAP21-001	1	ENSG00000107863	ENST00000396432	ENSE00003616527	5	-	ENSG00000107863	ENST00000396432	ENSE00001137224	7	-
chr10_25226113_25231365	multiexon	PRTFDC1-001	1	ENSG00000099256	ENST00000320152	ENSE00001344078	2	-	ENSG00000099256	ENST00000320152	ENSE00001344073	3	-
chr10_26994215_27009288	multiexon	PDSS1-001	1	ENSG00000148459	ENST00000376215	ENSE00001629104	4	+	ENSG00000148459	ENST00000376215	ENSE00001748927	6	+
chr10_27054147_27059274	multiexon	ABI1-001	1	ENSG00000136754	ENST00000376138	ENSE00001098430	5	-	ENSG00000136754	ENST00000376138	ENSE00001098440	7	-
chr10_27420788_27425314	multiexon	YME1L1-001	1	ENSG00000136758	ENST00000427324	ENSE00001098495	4	-	ENSG00000136758	ENST00000427324	ENSE00003496008	7	-
chr10_27431316_27434519	multiexon	YME1L1-003	3	ENSG00000136758	ENST00000396296	ENSE00003438742	4	-	ENSG00000136758	ENST00000396296	ENSE00001098492	5	-
chr10_27453993_27454468	multiexon	MASTL-001	1	ENSG00000120539	ENST00000342386	ENSE00000985399	5	+	ENSG00000120539	ENST00000342386	ENSE00000985400	6	+
chr10_27469882_27470510	multiexon	MASTL-003	3	ENSG00000120539	ENST00000375946	ENSE00000985403	10	+	ENSG00000120539	ENST00000375946	ENSE00000985404	11	+
chr10_27821436_27822923	multiexon	RAB18-001	1	ENSG00000099246	ENST00000356940	ENSE00003654355	4	+	ENSG00000099246	ENST00000356940	ENSE00003393549	6	+
chr10_27855761_27867642	intergenic
chr10_28023385_28024303	multiexon	MKX-001	1	ENSG00000150051	ENST00000375790	ENSE00002495077	4	-	ENSG00000150051	ENST00000375790	ENSE00002444686	5	-
chr10_28223939_28225809	multiexon	ARMC4-001	1	ENSG00000169126	ENST00000305242	ENSE00001122697	15	-	ENSG00000169126	ENST00000305242	ENSE00001122686	16	-
chr10_28358701_28378770	multiexon	MPP7-001	1	ENSG00000150054	ENST00000375732	ENSE00003536901	12	-	ENSG00000150054	ENST00000375732	ENSE00003578075	13	-
chr10_28420489_28438988	multiexon	MPP7-001	1	ENSG00000150054	ENST00000375732	ENSE00003663142	4	-	ENSG00000150054	ENST00000375732	ENSE00003536834	6	-
chr10_28872328_28879761	multiexon	WAC-001	1	ENSG00000095787	ENST00000375646	ENSE00003536660	4	+	ENSG00000095787	ENST00000375646	ENSE00003690089	6	+
chr10_30736711_30740673	multiexon	MAP3K8-002	2	ENSG00000107968	ENST00000263056	ENSE00003628545	4	+	ENSG00000107968	ENST00000263056	ENSE00000985785	6	+
chr10_30739187_30740673	multiexon	MAP3K8-002	2	ENSG00000107968	ENST00000263056	ENSE00001150513	5	+	ENSG00000107968	ENST00000263056	ENSE00000985785	6	+
chr10_31644073_31647262	putativeexon	ZEB1-021	21	ENSG00000148516	ENST00000558832	ENSE00001903760	2	+	ENSG00000148516	ENST00000558832	ENSE00002548748	3	+
chr10_31644073_31676195	multiexon	ZEB1-006	6	ENSG00000148516	ENST00000493835	ENSE00001903760	1	+	ENSG00000148516	ENST00000493835	ENSE00003696673	3	+
chr10_31644076_31647262	putativeexon	ZEB1-021	21	ENSG00000148516	ENST00000558832	ENSE00001903760	2	+
chr10_31661947_31676727	multiexon	ZEB1-006	6	ENSG00000148516	ENST00000493835	ENSE00003695437	2	+	ENSG00000148516	ENST00000493835	ENSE00001881251	4	+
chr10_32150323_32199491	multiexon	ARHGAP12-008	8	ENSG00000165322	ENST00000375250	ENSE00001300227	2	-	ENSG00000165322	ENST00000375250	ENSE00001092095	4	-
chr10_32197100_32199491	multiexon	ARHGAP12-008	8	ENSG00000165322	ENST00000375250	ENSE00001300227	2	-	ENSG00000165322	ENST00000375250	ENSE00001373213	3	-
chr10_32197100_32211888	intronic	ARHGAP12-001	1
chr10_32759992_32762951	multiexon	CCDC7-001	1	ENSG00000216937	ENST00000277657	ENSE00001644350	7	+	ENSG00000216937	ENST00000277657	ENSE00003529013	9	+
chr10_33552574_33552801	monoexon	NRP1-001	1	ENSG00000099250	ENST00000265371	ENSE00003691733	5	-
chr10_34558585_34573173	multiexon	PARD3-002	2	ENSG00000148498	ENST00000374789	ENSE00003694214	21	-	ENSG00000148498	ENST00000374789	ENSE00000993106	22	-
chr10_34759013_34806087	multiexon	PARD3-001	1	ENSG00000148498	ENST00000374776	ENSE00001345968	3	-	ENSG00000148498	ENST00000374776	ENSE00001216763	4	-
chr10_34985246_34989132	intronic	PARD3-001	1
chr10_35349802_35360267	multiexon	CUL2-001	1	ENSG00000108094	ENST00000374751	ENSE00003692474	2	-	ENSG00000108094	ENST00000374751	ENSE00003609367	4	-
chr10_35805451_35819171	multiexon	CCNY-001	1	ENSG00000108100	ENST00000374706	ENSE00003537914	6	+	ENSG00000108100	ENST00000374706	ENSE00003684674	9	+
chr10_43654163_43671480	multiexon	CSGALNACT2-001	1	ENSG00000169826	ENST00000374466	ENSE00001194776	3	+	ENSG00000169826	ENST00000374466	ENSE00001155834	7	+
chr10_46158028_46159290	multiexon	ZFAND4-008	8	ENSG00000172671	ENST00000495747	ENSE00003509000	2	-	ENSG00000172671	ENST00000495747	ENSE00001896733	3	-
chr10_46158990_46159290	monoexon	ZFAND4-002	2	ENSG00000172671	ENST00000344646	ENSE00003599980	2	-
chr10_486811_518489	multiexon	DIP2C-001	1	ENSG00000151240	ENST00000280886	ENSE00003510997	3	-	ENSG00000151240	ENST00000280886	ENSE00003560663	4	-
chr10_486811_532470	multiexon	DIP2C-001	1	ENSG00000151240	ENST00000280886	ENSE00003500812	2	-	ENSG00000151240	ENST00000280886	ENSE00003560663	4	-
chr10_4872867_4884696	multiexon	AKR1E2-002	2	ENSG00000165568	ENST00000463345	ENSE00003520950	2	+	ENSG00000165568	ENST00000463345	ENSE00003591753	8	+
chr10_4872867_4889491	multiexon	AKR1E2-002	2	ENSG00000165568	ENST00000463345	ENSE00003520950	2	+	ENSG00000165568	ENST00000463345	ENSE00001930618	9	+
chr10_4872867_4932115	intergenic	AKR1E2-001	1
chr10_4872867_4950612	intergenic	AKR1E2-001	1
chr10_4872867_4951798	intergenic	AKR1E2-001	1
chr10_49609655_49613024	multiexon	MAPK8-006	6	ENSG00000107643	ENST00000374189	ENSE00003540439	2	+	ENSG00000107643	ENST00000374189	ENSE00003638267	3	+
chr10_49609655_49618211	multiexon	MAPK8-004	4	ENSG00000107643	ENST00000429041	ENSE00003618266	2	+	ENSG00000107643	ENST00000429041	ENSE00002457248	4	+
chr10_50701163_50714058	multiexon	ERCC6-001	1	ENSG00000225830	ENST00000355832	ENSE00000905767	6	-	ENSG00000225830	ENST00000355832	ENSE00002536090	8	-
chr10_51040849_51051678	multiexon	PARG-001	1	ENSG00000227345	ENST00000402038	ENSE00001462471	10	-	ENSG00000227345	ENST00000402038	ENSE00001761710	12	-
chr10_51579128_51581378	multiexon	NCOA4-001	1	ENSG00000138293	ENST00000374087	ENSE00003603979	2	+	ENSG00000138293	ENST00000374087	ENSE00003469773	5	+
chr10_518379_532470	multiexon	DIP2C-001	1	ENSG00000151240	ENST00000280886	ENSE00003500812	2	-	ENSG00000151240	ENST00000280886	ENSE00003510997	3	-
chr10_52066604_52071175	putativeexon	SGMS1-003	3	ENSG00000198964	ENST00000361781	ENSE00001006831	9	-	ENSG00000198964	ENST00000361781	ENSE00001891402	11	-
chr10_52100147_52104105	intronic	SGMS1-002	2
chr10_52103252_52104105	monoexon	SGMS1-003	3	ENSG00000198964	ENST00000361781	ENSE00001124740	7	-
chr10_52193236_52226692	multiexon	SGMS1-003	3	ENSG00000198964	ENST00000361781	ENSE00001339695	4	-	ENSG00000198964	ENST00000361781	ENSE00001231654	6	-
chr10_52193236_52350007	multiexon	SGMS1-003	3	ENSG00000198964	ENST00000361781	ENSE00001339701	2	-	ENSG00000198964	ENST00000361781	ENSE00001231654	6	-
chr10_52220433_52350007	multiexon	SGMS1-003	3	ENSG00000198964	ENST00000361781	ENSE00001339701	2	-	ENSG00000198964	ENST00000361781	ENSE00001231663	5	-
chr10_530721_532470	multiexon	DIP2C-002	2	ENSG00000151240	ENST00000423550	ENSE00003500812	2	-	ENSG00000151240	ENST00000423550	ENSE00001561354	3	-
chr10_5751493_5754881	multiexon	FAM208B-007	7	ENSG00000108021	ENST00000473789	ENSE00001832000	2	+	ENSG00000108021	ENST00000473789	ENSE00001484396	3	+
chr10_5751493_5756170	intronic	FAM208B-002	2
chr10_5815805_5842668	multiexon	GDI2-001	1	ENSG00000057608	ENST00000380191	ENSE00001647202	2	-	ENSG00000057608	ENST00000380191	ENSE00003604091	7	-
chr10_5827105_5842668	multiexon	GDI2-001	1	ENSG00000057608	ENST00000380191	ENSE00001647202	2	-	ENSG00000057608	ENST00000380191	ENSE00001666686	6	-
chr10_5827815_5842668	multiexon	GDI2-001	1	ENSG00000057608	ENST00000380191	ENSE00001647202	2	-	ENSG00000057608	ENST00000380191	ENSE00002146447	5	-
chr10_5836848_5842668	multiexon	GDI2-001	1	ENSG00000057608	ENST00000380191	ENSE00001647202	2	-	ENSG00000057608	ENST00000380191	ENSE00001699249	4	-
chr10_60374053_60380661	intronic	BICC1-002	2
chr10_60549022_60553375	multiexon	BICC1-002	2	ENSG00000122870	ENST00000373886	ENSE00001461855	7	+	ENSG00000122870	ENST00000373886	ENSE00001461851	9	+
chr10_61592283_61612460	multiexon	CCDC6-001	1	ENSG00000108091	ENST00000263102	ENSE00000705239	2	-	ENSG00000108091	ENST00000263102	ENSE00000705238	3	-
chr10_61844360_61845011	multiexon	ANK3-001	1	ENSG00000151150	ENST00000280772	ENSE00003370097	31	-	ENSG00000151150	ENST00000280772	ENSE00003243449	32	-
chr10_62021617_62039397	multiexon	ANK3-001	1	ENSG00000151150	ENST00000280772	ENSE00002439064	2	-	ENSG00000151150	ENST00000280772	ENSE00002514748	7	-
chr10_64148155_64159552	putativeexon	ZNF365-001	1	ENSG00000138311	ENST00000395254	ENSE00003601362	3	+	ENSG00000138311	ENST00000395254	ENSE00003680962	5	+
chr10_64148155_64219556	multiexon	ZNF365-003	3	ENSG00000138311	ENST00000410046	ENSE00003601362	3	+	ENSG00000138311	ENST00000410046	ENSE00001589892	4	+
chr10_65140078_65140242	monoexon	JMJD1C-001	1	ENSG00000171988	ENST00000399262	ENSE00003588543	2	-
chr10_65140078_65169748	intronic	JMJD1C-001	1
chr10_65140078_65214849	intronic	JMJD1C-001	1
chr10_6875605_6880164	intronic	LINC00707-001	1
chr10_69647175_69651312	multiexon	SIRT1-001	1	ENSG00000096717	ENST00000212015	ENSE00003522189	2	+	ENSG00000096717	ENST00000212015	ENSE00003593793	4	+
chr10_69714352_69773943	multiexon	HERC4-001	1	ENSG00000148634	ENST00000373700	ENSE00003463902	9	-	ENSG00000148634	ENST00000373700	ENSE00003591886	19	-
chr10_69726440_69752439	multiexon	HERC4-001	1	ENSG00000148634	ENST00000373700	ENSE00003546911	10	-	ENSG00000148634	ENST00000373700	ENSE00003510181	16	-
chr10_69726440_69773943	multiexon	HERC4-001	1	ENSG00000148634	ENST00000373700	ENSE00003463902	9	-	ENSG00000148634	ENST00000373700	ENSE00003510181	16	-
chr10_69748420_69773943	multiexon	HERC4-001	1	ENSG00000148634	ENST00000373700	ENSE00003463902	9	-	ENSG00000148634	ENST00000373700	ENSE00003632404	15	-
chr10_69751956_69773943	multiexon	HERC4-001	1	ENSG00000148634	ENST00000373700	ENSE00003463902	9	-	ENSG00000148634	ENST00000373700	ENSE00003613864	11	-
chr10_69785303_69804320	multiexon	HERC4-001	1	ENSG00000148634	ENST00000373700	ENSE00001287219	4	-	ENSG00000148634	ENST00000373700	ENSE00003509398	8	-
chr10_69797850_69826974	intronic	HERC4-001	1
chr10_69902697_69909868	multiexon	MYPN-001	1	ENSG00000138347	ENST00000358913	ENSE00000993822	3	+	ENSG00000138347	ENST00000358913	ENSE00000993826	6	+
chr10_69902697_69918384	multiexon	MYPN-001	1	ENSG00000138347	ENST00000358913	ENSE00000993822	3	+	ENSG00000138347	ENST00000358913	ENSE00000993828	7	+
chr10_69966527_69970304	putativeexon	MYPN-001	1	ENSG00000138347	ENST00000358913	ENSE00000933632	19	+	ENSG00000138347	ENST00000358913	ENSE00001461223	20	+
chr10_70152895_70154208	multiexon	RUFY2-001	1	ENSG00000204130	ENST00000466493	ENSE00003663211	5	-	ENSG00000204130	ENST00000466493	ENSE00003627892	7	-
chr10_70153832_70154208	multiexon	RUFY2-001	1	ENSG00000204130	ENST00000466493	ENSE00003663211	5	-	ENSG00000204130	ENST00000466493	ENSE00003472714	6	-
chr10_70190193_70190417	monoexon	DNA2-202	202	ENSG00000138346	ENST00000399180	ENSE00001536883	14	-
chr10_70218861_70229920	multiexon	DNA2-001	1	ENSG00000138346	ENST00000358410	ENSE00003613396	2	-	ENSG00000138346	ENST00000358410	ENSE00001771913	5	-
chr10_70227880_70229920	multiexon	DNA2-001	1	ENSG00000138346	ENST00000358410	ENSE00003613396	2	-	ENSG00000138346	ENST00000358410	ENSE00001729648	3	-
chr10_70246901_70253327	multiexon	SLC25A16-002	2	ENSG00000122912	ENST00000609923	ENSE00003505522	5	-	ENSG00000122912	ENST00000609923	ENSE00003707755	8	-
chr10_70246901_70266475	multiexon	SLC25A16-001	1	ENSG00000122912	ENST00000265870	ENSE00003705379	3	-	ENSG00000122912	ENST00000265870	ENSE00003704838	7	-
chr10_70246901_70276600	multiexon	SLC25A16-001	1	ENSG00000122912	ENST00000265870	ENSE00003707492	2	-	ENSG00000122912	ENST00000265870	ENSE00003704838	7	-
chr10_70411603_70433244	intronic	TET1-001	1
chr10_70545893_70546449	multiexon	CCAR1-001	1	ENSG00000060339	ENST00000265872	ENSE00003667816	20	+	ENSG00000060339	ENST00000265872	ENSE00003691762	21	+
chr10_70696692_70703013	multiexon	DDX50-001	1	ENSG00000107625	ENST00000373585	ENSE00003520840	12	+	ENSG00000107625	ENST00000373585	ENSE00003507759	14	+
chr10_70723047_70726959	multiexon	DDX21-001	1	ENSG00000165732	ENST00000354185	ENSE00001095955	4	+	ENSG00000165732	ENST00000354185	ENSE00000986288	6	+
chr10_70733301_70741337	multiexon	DDX21-001	1	ENSG00000165732	ENST00000354185	ENSE00000986299	10	+	ENSG00000165732	ENST00000354185	ENSE00000834221	14	+
chr10_70915568_70917967	multiexon	VPS26A-001	1	ENSG00000122958	ENST00000373382	ENSE00003541904	4	+	ENSG00000122958	ENST00000373382	ENSE00003546494	6	+
chr10_70945743_70951522	multiexon	SUPV3L1-001	1	ENSG00000156502	ENST00000359655	ENSE00003465434	2	+	ENSG00000156502	ENST00000359655	ENSE00003626775	6	+
chr10_71243447_71258152	multiexon	TSPAN15-001	1	ENSG00000099282	ENST00000373290	ENSE00000638708	2	+	ENSG00000099282	ENST00000373290	ENSE00003685116	5	+
chr10_71968961_71969441	multiexon	PPA1-001	1	ENSG00000180817	ENST00000373232	ENSE00001261978	7	-	ENSG00000180817	ENST00000373232	ENSE00001261972	8	-
chr10_71977568_71978573	multiexon	PPA1-001	1	ENSG00000180817	ENST00000373232	ENSE00001262004	3	-	ENSG00000180817	ENST00000373232	ENSE00001261994	4	-
chr10_72099752_72100458	intronic	LRRC20-001	1
chr10_72285679_72291210	multiexon	PALD1-001	1	ENSG00000107719	ENST00000263563	ENSE00001186038	2	+	ENSG00000107719	ENST00000263563	ENSE00000986987	5	+
chr10_72462068_72468534	multiexon	ADAMTS14-001	1	ENSG00000138316	ENST00000373208	ENSE00001101085	3	+	ENSG00000138316	ENST00000373208	ENSE00001101097	4	+
chr10_72604230_72610967	multiexon	SGPL1-001	1	ENSG00000166224	ENST00000373202	ENSE00001101211	3	+	ENSG00000166224	ENST00000373202	ENSE00001101201	4	+
chr10_72604230_72619256	multiexon	SGPL1-001	1	ENSG00000166224	ENST00000373202	ENSE00001101211	3	+	ENSG00000166224	ENST00000373202	ENSE00001101198	7	+
chr10_7262373_7269899	multiexon	SFMBT2-001	1	ENSG00000198879	ENST00000361972	ENSE00000837270	10	-	ENSG00000198879	ENST00000361972	ENSE00000915092	11	-
chr10_7262373_7318951	multiexon	SFMBT2-001	1	ENSG00000198879	ENST00000361972	ENSE00000837272	7	-	ENSG00000198879	ENST00000361972	ENSE00000915092	11	-
chr10_7262373_7327916	multiexon	SFMBT2-001	1	ENSG00000198879	ENST00000361972	ENSE00001215170	5	-	ENSG00000198879	ENST00000361972	ENSE00000915092	11	-
chr10_7285520_7318951	multiexon	SFMBT2-001	1	ENSG00000198879	ENST00000361972	ENSE00000837272	7	-	ENSG00000198879	ENST00000361972	ENSE00000915093	9	-
chr10_7285520_7327916	multiexon	SFMBT2-001	1	ENSG00000198879	ENST00000361972	ENSE00001215170	5	-	ENSG00000198879	ENST00000361972	ENSE00000915093	9	-
chr10_7290510_7327916	multiexon	SFMBT2-001	1	ENSG00000198879	ENST00000361972	ENSE00001215170	5	-	ENSG00000198879	ENST00000361972	ENSE00000689524	8	-
chr10_7318854_7327916	multiexon	SFMBT2-001	1	ENSG00000198879	ENST00000361972	ENSE00001215170	5	-	ENSG00000198879	ENST00000361972	ENSE00000837272	7	-
chr10_73887840_73892939	multiexon	ASCC1-003	3	ENSG00000138303	ENST00000317168	ENSE00000933763	8	-	ENSG00000138303	ENST00000317168	ENSE00003623161	9	-
chr10_73887840_73912746	multiexon	ASCC1-003	3	ENSG00000138303	ENST00000317168	ENSE00000933762	7	-	ENSG00000138303	ENST00000317168	ENSE00003623161	9	-
chr10_74100547_74100928	multiexon	DNAJB12-001	1	ENSG00000148719	ENST00000444643	ENSE00003706955	4	-	ENSG00000148719	ENST00000444643	ENSE00003702617	5	-
chr10_74468041_74475660	multiexon	MCU-005	5	ENSG00000156026	ENST00000604679	ENSE00003595757	2	+	ENSG00000156026	ENST00000604679	ENSE00003543734	4	+
chr10_74468041_74501603	intronic	MCU-001	1
chr10_74474869_74475660	multiexon	MCU-005	5	ENSG00000156026	ENST00000604679	ENSE00003524488	3	+	ENSG00000156026	ENST00000604679	ENSE00003543734	4	+
chr10_74501480_74502031	intronic	MCU-001	1
chr10_75156277_75160615	multiexon	ANXA7-001	1	ENSG00000138279	ENST00000372921	ENSE00001459061	2	-	ENSG00000138279	ENST00000372921	ENSE00003476886	5	-
chr10_75331179_75336119	multiexon	USP54-011	11	ENSG00000166348	ENST00000433394	ENSE00001677326	3	-	ENSG00000166348	ENST00000433394	ENSE00003676750	5	-
chr10_75506388_75506762	multiexon	SEC24C-002	2	ENSG00000176986	ENST00000339365	ENSE00001383824	2	+	ENSG00000176986	ENST00000339365	ENSE00003463139	3	+
chr10_75576781_75583842	multiexon	CAMK2G-001	1	ENSG00000148660	ENST00000322635	ENSE00003501034	16	-	ENSG00000148660	ENST00000322635	ENSE00003566246	19	-
chr10_75848954_75984349	intergenic	ADK-001	1
chr10_76002496_76158337	intronic	ADK-001	1
chr10_76074425_76158337	multiexon	ADK-001	1	ENSG00000156110	ENST00000286621	ENSE00001178540	4	+	ENSG00000156110	ENST00000286621	ENSE00001024570	6	+
chr10_76349040_76360251	multiexon	ADK-001	1	ENSG00000156110	ENST00000286621	ENSE00001248835	8	+	ENSG00000156110	ENST00000286621	ENSE00001248829	9	+
chr10_76598441_76603236	multiexon	KAT6B-001	1	ENSG00000156650	ENST00000372724	ENSE00001247860	2	+	ENSG00000156650	ENST00000372724	ENSE00001167134	3	+
chr10_76910272_76910864	monoexon	SAMD8-001	1	ENSG00000156671	ENST00000372687	ENSE00003601521	2	+
chr10_76978821_76979114	multiexon	VDAC2-001	1	ENSG00000165637	ENST00000332211	ENSE00003598568	5	+	ENSG00000165637	ENST00000332211	ENSE00003562106	6	+
chr10_77306789_77307420	intergenic
chr10_7839010_7844817	multiexon	ATP5C1-001	1	ENSG00000165629	ENST00000356708	ENSE00003615216	3	+	ENSG00000165629	ENST00000356708	ENSE00003599482	8	+
chr10_79613112_79614128	multiexon	DLG5-001	1	ENSG00000151208	ENST00000372391	ENSE00001211401	4	-	ENSG00000151208	ENST00000372391	ENSE00001211398	5	-
chr10_79741912_79744056	multiexon	POLR3A-002	2	ENSG00000148606	ENST00000372371	ENSE00001092894	25	-	ENSG00000148606	ENST00000372371	ENSE00003443109	28	-
chr10_82228303_82249070	multiexon	TSPAN14-006	6	ENSG00000108219	ENST00000372156	ENSE00001457019	4	+	ENSG00000108219	ENST00000372156	ENSE00003597471	5	+
chr10_86130770_86133571	putativeexon	CCSER2-001	1	ENSG00000107771	ENST00000359979	ENSE00001795795	2	+	ENSG00000107771	ENST00000359979	ENSE00001422352	3	+
chr10_86177527_86185649	multiexon	CCSER2-002	2	ENSG00000107771	ENST00000224756	ENSE00003525739	4	+	ENSG00000107771	ENST00000224756	ENSE00003565300	5	+
chr10_86177527_86198463	multiexon	CCSER2-002	2	ENSG00000107771	ENST00000224756	ENSE00003525739	4	+	ENSG00000107771	ENST00000224756	ENSE00003607136	6	+
chr10_88203032_88206206	multiexon	WAPAL-001	1	ENSG00000062650	ENST00000298767	ENSE00000830508	16	-	ENSG00000062650	ENST00000298767	ENSE00000830509	17	-
chr10_882343_890995	multiexon	LARP4B-002	2	ENSG00000107929	ENST00000316157	ENSE00001682733	5	-	ENSG00000107929	ENST00000316157	ENSE00001697572	7	-
chr10_88598622_88635842	multiexon	BMPR1A-001	1	ENSG00000107779	ENST00000372037	ENSE00001456787	2	+	ENSG00000107779	ENST00000372037	ENSE00003499010	3	+
chr10_89268093_89280926	multiexon	MINPP1-001	1	ENSG00000107789	ENST00000371996	ENSE00000909243	2	+	ENSG00000107789	ENST00000371996	ENSE00000909241	4	+
chr10_89527430_89536184	multiexon	ATAD1-001	1	ENSG00000138138	ENST00000308448	ENSE00000932772	6	-	ENSG00000138138	ENST00000308448	ENSE00000932770	8	-
chr10_89685270_89693008	multiexon	PTEN-001	1	ENSG00000171862	ENST00000371953	ENSE00001156344	3	+	ENSG00000171862	ENST00000371953	ENSE00001156330	5	+
chr10_89685270_89712016	multiexon	PTEN-001	1	ENSG00000171862	ENST00000371953	ENSE00001156344	3	+	ENSG00000171862	ENST00000371953	ENSE00001156327	6	+
chr10_90653628_90665417	intronic	STAMBPL1-001	1
chr10_909683_910210	multiexon	LARP4B-002	2	ENSG00000107929	ENST00000316157	ENSE00003554167	3	-	ENSG00000107929	ENST00000316157	ENSE00003553969	4	-
chr10_909683_931700	putativeexon	LARP4B-002	2	ENSG00000107929	ENST00000316157	ENSE00002275261	1	-	ENSG00000107929	ENST00000316157	ENSE00003553969	4	-
chr10_93000241_93011197	multiexon	PCGF5-001	1	ENSG00000180628	ENST00000336126	ENSE00001338277	3	+	ENSG00000180628	ENST00000336126	ENSE00001338268	6	+
chr10_93185038_93221941	putativeexon	HECTD2-001	1	ENSG00000165338	ENST00000371681	ENSE00003595529	2	+	ENSG00000165338	ENST00000371681	ENSE00001747493	5	+
chr10_93220184_93221941	putativeexon	HECTD2-001	1	ENSG00000165338	ENST00000371681	ENSE00002535693	3	+	ENSG00000165338	ENST00000371681	ENSE00001747493	5	+
chr10_93699709_93702325	multiexon	BTAF1-001	1	ENSG00000095564	ENST00000265990	ENSE00000932844	3	+	ENSG00000095564	ENST00000265990	ENSE00000986555	4	+
chr10_93754292_93768032	multiexon	BTAF1-001	1	ENSG00000095564	ENST00000265990	ENSE00001092235	23	+	ENSG00000095564	ENST00000265990	ENSE00001092244	26	+
chr10_93756126_93768032	multiexon	BTAF1-001	1	ENSG00000095564	ENST00000265990	ENSE00001092246	24	+	ENSG00000095564	ENST00000265990	ENSE00001092244	26	+
chr10_93841077_93851701	multiexon	CPEB3-001	1	ENSG00000107864	ENST00000412050	ENSE00002487271	8	-	ENSG00000107864	ENST00000412050	ENSE00000810688	9	-
chr10_93870833_93940776	multiexon	CPEB3-001	1	ENSG00000107864	ENST00000412050	ENSE00000713779	4	-	ENSG00000107864	ENST00000412050	ENSE00000713769	7	-
chr10_93870833_93952393	multiexon	CPEB3-001	1	ENSG00000107864	ENST00000412050	ENSE00001517750	3	-	ENSG00000107864	ENST00000412050	ENSE00000713769	7	-
chr10_93902786_93904869	multiexon	CPEB3-001	1	ENSG00000107864	ENST00000412050	ENSE00001517749	5	-	ENSG00000107864	ENST00000412050	ENSE00002490646	6	-
chr10_93902786_93940776	multiexon	CPEB3-001	1	ENSG00000107864	ENST00000412050	ENSE00000713779	4	-	ENSG00000107864	ENST00000412050	ENSE00002490646	6	-
chr10_93902786_93952393	multiexon	CPEB3-001	1	ENSG00000107864	ENST00000412050	ENSE00001517750	3	-	ENSG00000107864	ENST00000412050	ENSE00002490646	6	-
chr10_94291505_94297307	multiexon	IDE-001	1	ENSG00000119912	ENST00000265986	ENSE00003669674	2	-	ENSG00000119912	ENST00000265986	ENSE00003646142	4	-
chr10_94653106_94659401	multiexon	EXOC6-001	1	ENSG00000138190	ENST00000260762	ENSE00001695079	2	+	ENSG00000138190	ENST00000260762	ENSE00001712164	5	+
chr10_94653106_94669388	multiexon	EXOC6-001	1	ENSG00000138190	ENST00000260762	ENSE00001695079	2	+	ENSG00000138190	ENST00000260762	ENSE00001765204	6	+
chr10_94653106_94679807	multiexon	EXOC6-001	1	ENSG00000138190	ENST00000260762	ENSE00001695079	2	+	ENSG00000138190	ENST00000260762	ENSE00001780826	8	+
chr10_94733810_94774024	multiexon	EXOC6-001	1	ENSG00000138190	ENST00000260762	ENSE00001092309	18	+	ENSG00000138190	ENST00000260762	ENSE00003508616	20	+
chr10_95140976_95148911	multiexon	MYOF-004	4	ENSG00000138119	ENST00000358334	ENSE00001796656	17	-	ENSG00000138119	ENST00000358334	ENSE00002512650	19	-
chr10_96005703_96006378	monoexon	PLCE1-001	1	ENSG00000138193	ENST00000371380	ENSE00001123935	7	+
chr10_96201653_96203180	intronic	TBC1D12-001	1
chr10_96201653_96204296	intronic	TBC1D12-001	1
chr10_96201653_96234540	multiexon	TBC1D12-001	1	ENSG00000108239	ENST00000225235	ENSE00000715888	2	+	ENSG00000108239	ENST00000225235	ENSE00000933023	3	+
chr10_96201653_96253204	multiexon	TBC1D12-001	1	ENSG00000108239	ENST00000225235	ENSE00000715888	2	+	ENSG00000108239	ENST00000225235	ENSE00000810844	4	+
chr10_97156977_97158946	multiexon	SORBS1-001	1	ENSG00000095637	ENST00000306402	ENSE00003639463	11	-	ENSG00000095637	ENST00000306402	ENSE00003694149	12	-
chr10_97250792_97253043	intronic	SORBS1-001	1
chr10_98618049_98667504	intronic	LCOR-009	9
chr10_98667022_98667504	multiexon	LCOR-009	9	ENSG00000196233	ENST00000371097	ENSE00001097437	3	+	ENSG00000196233	ENST00000371097	ENSE00001097431	4	+
chr10_98667022_98704002	multiexon	LCOR-009	9	ENSG00000196233	ENST00000371097	ENSE00001097437	3	+	ENSG00000196233	ENST00000371097	ENSE00001097435	5	+
chr10_98703870_98711953	multiexon	LCOR-009	9	ENSG00000196233	ENST00000371097	ENSE00001097435	5	+	ENSG00000196233	ENST00000371097	ENSE00003592556	7	+
chr10_99196174_99197507	putativeexon	EXOSC1-001	1	ENSG00000171311	ENST00000370902	ENSE00003588946	6	-	ENSG00000171311	ENST00000370902	ENSE00001821930	8	-
chr10_99196948_99197507	multiexon	EXOSC1-001	1	ENSG00000171311	ENST00000370902	ENSE00003588946	6	-	ENSG00000171311	ENST00000370902	ENSE00003659317	7	-
chr10_99236440_99238146	multiexon	MMS19-005	5	ENSG00000155229	ENST00000438925	ENSE00003577054	4	-	ENSG00000155229	ENST00000438925	ENSE00003504859	8	-
chr10_99416042_99416731	multiexon	PI4K2A-001	1	ENSG00000155252	ENST00000370631	ENSE00003650300	3	+	ENSG00000155252	ENST00000370631	ENSE00003569936	4	+
chr10_99416042_99424741	multiexon	PI4K2A-001	1	ENSG00000155252	ENST00000370631	ENSE00003650300	3	+	ENSG00000155252	ENST00000370631	ENSE00003558325	6	+
chr10_99502851_99504672	multiexon	ZFYVE27-003	3	ENSG00000155256	ENST00000393677	ENSE00003322645	3	+	ENSG00000155256	ENST00000393677	ENSE00003672279	4	+
chr10_99915850_99923154	multiexon	R3HCC1L-001	1	ENSG00000166024	ENST00000298999	ENSE00001453092	2	+	ENSG00000166024	ENST00000298999	ENSE00003537783	4	+
chr11_1000432_1003804	multiexon	AP2A2-001	1	ENSG00000183020	ENST00000448903	ENSE00003548307	15	+	ENSG00000183020	ENST00000448903	ENSE00003508496	16	+
chr11_10019813_10024236	multiexon	SBF2-001	1	ENSG00000133812	ENST00000256190	ENSE00003523607	7	-	ENSG00000133812	ENST00000256190	ENSE00003482651	9	-
chr11_102076624_102080295	multiexon	YAP1-002	2	ENSG00000137693	ENST00000282441	ENSE00001292600	5	+	ENSG00000137693	ENST00000282441	ENSE00001321313	6	+
chr11_10209896_10215534	intronic	SBF2-001	1
chr11_102233627_102239279	multiexon	BIRC2-001	1	ENSG00000110330	ENST00000227758	ENSE00003504775	4	+	ENSG00000110330	ENST00000227758	ENSE00003612642	6	+
chr11_103090644_103093815	multiexon	DYNC2H1-001	1	ENSG00000187240	ENST00000375735	ENSE00001618476	56	+	ENSG00000187240	ENST00000375735	ENSE00001468219	59	+
chr11_103173822_103182762	multiexon	DYNC2H1-001	1	ENSG00000187240	ENST00000375735	ENSE00002450916	76	+	ENSG00000187240	ENST00000375735	ENSE00001468190	79	+
chr11_103173822_103187349	multiexon	DYNC2H1-001	1	ENSG00000187240	ENST00000375735	ENSE00002450916	76	+	ENSG00000187240	ENST00000375735	ENSE00001468189	80	+
chr11_103173822_103194718	multiexon	DYNC2H1-001	1	ENSG00000187240	ENST00000375735	ENSE00002450916	76	+	ENSG00000187240	ENST00000375735	ENSE00003531170	82	+
chr11_103182607_103194718	multiexon	DYNC2H1-001	1	ENSG00000187240	ENST00000375735	ENSE00001468190	79	+	ENSG00000187240	ENST00000375735	ENSE00003531170	82	+
chr11_103182607_103229087	multiexon	DYNC2H1-001	1	ENSG00000187240	ENST00000375735	ENSE00001468190	79	+	ENSG00000187240	ENST00000375735	ENSE00003506846	83	+
chr11_103187274_103194718	multiexon	DYNC2H1-001	1	ENSG00000187240	ENST00000375735	ENSE00001468189	80	+	ENSG00000187240	ENST00000375735	ENSE00003531170	82	+
chr11_106680719_106681204	monoexon	GUCY1A2-001	1	ENSG00000152402	ENST00000526355	ENSE00001005004	5	-
chr11_106810186_106810904	monoexon	GUCY1A2-001	1	ENSG00000152402	ENST00000526355	ENSE00001005008	4	-
chr11_106810186_106856857	multiexon	GUCY1A2-001	1	ENSG00000152402	ENST00000526355	ENSE00001101362	2	-	ENSG00000152402	ENST00000526355	ENSE00001005008	4	-
chr11_106849345_106856857	multiexon	GUCY1A2-001	1	ENSG00000152402	ENST00000526355	ENSE00001101362	2	-	ENSG00000152402	ENST00000526355	ENSE00001101354	3	-
chr11_107200644_107224462	multiexon	CWF19L2-001	1	ENSG00000152404	ENST00000282251	ENSE00001244045	13	-	ENSG00000152404	ENST00000282251	ENSE00003614672	17	-
chr11_107260800_107263621	multiexon	CWF19L2-001	1	ENSG00000152404	ENST00000282251	ENSE00001101384	11	-	ENSG00000152404	ENST00000282251	ENSE00001101403	12	-
chr11_107673727_107677602	multiexon	SLC35F2-001	1	ENSG00000110660	ENST00000525071	ENSE00003485349	7	-	ENSG00000110660	ENST00000525071	ENSE00003588068	10	-
chr11_107673727_107686691	multiexon	SLC35F2-001	1	ENSG00000110660	ENST00000525071	ENSE00003592967	5	-	ENSG00000110660	ENST00000525071	ENSE00003588068	10	-
chr11_107959254_107960350	multiexon	CUL5-001	1	ENSG00000166266	ENST00000393094	ENSE00001101600	12	+	ENSG00000166266	ENST00000393094	ENSE00001101612	13	+
chr11_108046973_108047817	multiexon	NPAT-001	1	ENSG00000149308	ENST00000278612	ENSE00003540993	11	-	ENSG00000149308	ENST00000278612	ENSE00003543369	12	-
chr11_108057209_108061227	multiexon	NPAT-001	1	ENSG00000149308	ENST00000278612	ENSE00003677327	5	-	ENSG00000149308	ENST00000278612	ENSE00003524830	8	-
chr11_108098322_108100050	multiexon	ATM-001	1	ENSG00000149311	ENST00000527805	ENSE00003535574	2	+	ENSG00000149311	ENST00000527805	ENSE00003614955	4	+
chr11_108098322_108106561	multiexon	ATM-001	1	ENSG00000149311	ENST00000527805	ENSE00003535574	2	+	ENSG00000149311	ENST00000527805	ENSE00001667088	5	+
chr11_108129713_108138069	multiexon	ATM-001	1	ENSG00000149311	ENST00000527805	ENSE00001769509	16	+	ENSG00000149311	ENST00000527805	ENSE00001719378	17	+
chr11_108172375_108175579	multiexon	ATM-003	3	ENSG00000149311	ENST00000452508	ENSE00003590115	36	+	ENSG00000149311	ENST00000452508	ENSE00003472092	38	+
chr11_110007388_110008139	monoexon	ZC3H12C-001	1	ENSG00000149289	ENST00000278590	ENSE00001415154	2	+
chr11_110134685_110135599	multiexon	RDX-001	1	ENSG00000137710	ENST00000343115	ENSE00003588483	4	-	ENSG00000137710	ENST00000343115	ENSE00003658656	5	-
chr11_111477419_111491126	intronic	SIK2-001	1
chr11_111486967_111491126	multiexon	SIK2-001	1	ENSG00000170145	ENST00000304987	ENSE00001185074	2	+	ENSG00000170145	ENST00000304987	ENSE00001185069	3	+
chr11_111622883_111624301	multiexon	PPP2R1B-001	1	ENSG00000137713	ENST00000527614	ENSE00003647708	9	-	ENSG00000137713	ENST00000527614	ENSE00003654752	10	-
chr11_111948939_111951282	multiexon	C11orf57-001	1	ENSG00000150776	ENST00000280352	ENSE00003463716	3	+	ENSG00000150776	ENST00000280352	ENSE00003604421	4	+
chr11_11348633_11362551	multiexon	GALNT18-001	1	ENSG00000110328	ENST00000227756	ENSE00001194988	7	-	ENSG00000110328	ENST00000227756	ENSE00001194978	9	-
chr11_117023157_117034608	multiexon	PAFAH1B2-001	1	ENSG00000168092	ENST00000527958	ENSE00003582892	2	+	ENSG00000168092	ENST00000527958	ENSE00001131376	5	+
chr11_117030650_117034608	multiexon	PAFAH1B2-001	1	ENSG00000168092	ENST00000527958	ENSE00003599941	3	+	ENSG00000168092	ENST00000527958	ENSE00001131376	5	+
chr11_118379851_118382740	multiexon	KMT2A-001	1	ENSG00000118058	ENST00000534358	ENSE00002441772	29	+	ENSG00000118058	ENST00000534358	ENSE00002456578	31	+
chr11_118425174_118430579	multiexon	IFT46-001	1	ENSG00000118096	ENST00000264021	ENSE00003597191	3	-	ENSG00000118096	ENST00000264021	ENSE00003549761	7	-
chr11_118453894_118455359	multiexon	ARCN1-001	1	ENSG00000095139	ENST00000264028	ENSE00003580071	3	+	ENSG00000095139	ENST00000264028	ENSE00000748273	5	+
chr11_118454524_118455359	multiexon	ARCN1-001	1	ENSG00000095139	ENST00000264028	ENSE00000748272	4	+	ENSG00000095139	ENST00000264028	ENSE00000748273	5	+
chr11_118484009_118484611	multiexon	PHLDB1-001	1	ENSG00000019144	ENST00000361417	ENSE00001326327	2	+	ENSG00000019144	ENST00000361417	ENSE00003520782	3	+
chr11_118625414_118627996	multiexon	DDX6-001	1	ENSG00000110367	ENST00000264018	ENSE00003612108	10	-	ENSG00000110367	ENST00000264018	ENSE00003580326	13	-
chr11_118629483_118634015	multiexon	DDX6-001	1	ENSG00000110367	ENST00000264018	ENSE00001127237	7	-	ENSG00000110367	ENST00000264018	ENSE00000498999	9	-
chr11_118656761_118657227	monoexon	DDX6-001	1	ENSG00000110367	ENST00000264018	ENSE00003517690	2	-
chr11_118940944_118944661	multiexon	VPS11-001	1	ENSG00000160695	ENST00000531528	ENSE00003586771	4	+	ENSG00000160695	ENST00000531528	ENSE00003592907	7	+
chr11_11895347_11901927	multiexon	USP47-003	3	ENSG00000170242	ENST00000399455	ENSE00001481918	2	+	ENSG00000170242	ENST00000399455	ENSE00003634726	3	+
chr11_118997645_118997835	monoexon	HINFP-001	1	ENSG00000172273	ENST00000350777	ENSE00003538875	2	+
chr11_119002245_119003929	multiexon	HINFP-001	1	ENSG00000172273	ENST00000350777	ENSE00003617216	4	+	ENSG00000172273	ENST00000350777	ENSE00003544912	9	+
chr11_11901724_11919240	multiexon	USP47-002	2	ENSG00000170242	ENST00000527733	ENSE00003634726	2	+	ENSG00000170242	ENST00000527733	ENSE00003690957	5	+
chr11_119103158_119103405	monoexon	CBL-001	1	ENSG00000110395	ENST00000264033	ENSE00001240799	2	+
chr11_119144578_119145663	multiexon	CBL-001	1	ENSG00000110395	ENST00000264033	ENSE00001240790	4	+	ENSG00000110395	ENST00000264033	ENSE00001240782	5	+
chr11_120310838_120316173	multiexon	ARHGEF12-001	1	ENSG00000196914	ENST00000397843	ENSE00003592166	13	+	ENSG00000196914	ENST00000397843	ENSE00003688423	16	+
chr11_120339997_120348235	multiexon	ARHGEF12-001	1	ENSG00000196914	ENST00000397843	ENSE00003539605	30	+	ENSG00000196914	ENST00000397843	ENSE00003560346	36	+
chr11_120343759_120348235	multiexon	ARHGEF12-001	1	ENSG00000196914	ENST00000397843	ENSE00003464116	31	+	ENSG00000196914	ENST00000397843	ENSE00003560346	36	+
chr11_120345269_120348235	multiexon	ARHGEF12-001	1	ENSG00000196914	ENST00000397843	ENSE00003532485	32	+	ENSG00000196914	ENST00000397843	ENSE00003560346	36	+
chr11_120347370_120348235	multiexon	ARHGEF12-001	1	ENSG00000196914	ENST00000397843	ENSE00003603079	34	+	ENSG00000196914	ENST00000397843	ENSE00003560346	36	+
chr11_120524394_120531109	multiexon	GRIK4-001	1	ENSG00000149403	ENST00000527524	ENSE00002185418	2	+	ENSG00000149403	ENST00000527524	ENSE00003483042	3	+
chr11_120916383_120918376	multiexon	TBCEL-001	1	ENSG00000154114	ENST00000422003	ENSE00001374752	2	+	ENSG00000154114	ENST00000422003	ENSE00003459498	3	+
chr11_120916383_120924441	multiexon	TBCEL-001	1	ENSG00000154114	ENST00000422003	ENSE00001374752	2	+	ENSG00000154114	ENST00000422003	ENSE00001390952	4	+
chr11_120916383_120926017	multiexon	TBCEL-001	1	ENSG00000154114	ENST00000422003	ENSE00001374752	2	+	ENSG00000154114	ENST00000422003	ENSE00003501157	5	+
chr11_120916383_120930794	multiexon	TBCEL-001	1	ENSG00000154114	ENST00000422003	ENSE00001374752	2	+	ENSG00000154114	ENST00000422003	ENSE00003478158	7	+
chr11_121348827_121367758	multiexon	SORL1-001	1	ENSG00000137642	ENST00000260197	ENSE00003478901	3	+	ENSG00000137642	ENST00000260197	ENSE00003606568	6	+
chr11_122162992_122164314	multiexon	RP11-820L6.1-001	1	ENSG00000255090	ENST00000527474	ENSE00002179243	2	-	ENSG00000255090	ENST00000527474	ENSE00002164822	3	-
chr11_122162992_122165713	intronic	RP11-820L6.1-001	1
chr11_122646927_122647918	multiexon	UBASH3B-001	1	ENSG00000154127	ENST00000284273	ENSE00003479909	2	+	ENSG00000154127	ENST00000284273	ENSE00003554082	3	+
chr11_122953793_122955421	multiexon	CLMP-001	1	ENSG00000166250	ENST00000448775	ENSE00003561866	3	-	ENSG00000166250	ENST00000448775	ENSE00003470142	5	-
chr11_12525861_12535612	multiexon	PARVA-001	1	ENSG00000197702	ENST00000334956	ENSE00003591103	6	+	ENSG00000197702	ENST00000334956	ENSE00001407717	10	+
chr11_125513687_125514538	multiexon	CHEK1-001	1	ENSG00000149554	ENST00000427383	ENSE00003500200	8	+	ENSG00000149554	ENST00000427383	ENSE00003490088	10	+
chr11_125513687_125526230	putativeexon	CHEK1-004	4	ENSG00000149554	ENST00000534070	ENSE00003500200	9	+	ENSG00000149554	ENST00000534070	ENSE00002198063	13	+
chr11_126051390_126052982	intergenic
chr11_126275991_126279306	multiexon	ST3GAL4-001	1	ENSG00000110080	ENST00000530591	ENSE00003505960	2	+	ENSG00000110080	ENST00000530591	ENSE00003692501	9	+
chr11_12696956_12785981	multiexon	TEAD1-001	1	ENSG00000187079	ENST00000527636	ENSE00001564120	2	+	ENSG00000187079	ENST00000527636	ENSE00001481782	3	+
chr11_12785726_12785981	monoexon	TEAD1-001	1	ENSG00000187079	ENST00000527636	ENSE00001481782	3	+
chr11_12785726_12815925	intronic	TEAD1-001	1
chr11_12883797_12886447	multiexon	TEAD1-001	1	ENSG00000187079	ENST00000527636	ENSE00003639365	4	+	ENSG00000187079	ENST00000527636	ENSE00001260300	5	+
chr11_128910823_128936763	multiexon	ARHGAP32-001	1	ENSG00000134909	ENST00000310343	ENSE00002533020	6	-	ENSG00000134909	ENST00000310343	ENSE00003522366	10	-
chr11_128932175_128936763	multiexon	ARHGAP32-001	1	ENSG00000134909	ENST00000310343	ENSE00002533020	6	-	ENSG00000134909	ENST00000310343	ENSE00003534854	9	-
chr11_128963516_128994789	multiexon	ARHGAP32-001	1	ENSG00000134909	ENST00000310343	ENSE00002454217	3	-	ENSG00000134909	ENST00000310343	ENSE00002496377	5	-
chr11_128963516_128997200	intronic	ARHGAP32-001	1
chr11_128963516_129034322	multiexon	ARHGAP32-001	1	ENSG00000134909	ENST00000310343	ENSE00003613743	2	-	ENSG00000134909	ENST00000310343	ENSE00002496377	5	-
chr11_128993341_128994789	multiexon	ARHGAP32-001	1	ENSG00000134909	ENST00000310343	ENSE00002454217	3	-	ENSG00000134909	ENST00000310343	ENSE00002517509	4	-
chr11_128993341_128997200	intronic	ARHGAP32-001	1
chr11_128993341_129034322	multiexon	ARHGAP32-001	1	ENSG00000134909	ENST00000310343	ENSE00003613743	2	-	ENSG00000134909	ENST00000310343	ENSE00002517509	4	-
chr11_12901255_12923660	multiexon	TEAD1-001	1	ENSG00000187079	ENST00000527636	ENSE00001260282	6	+	ENSG00000187079	ENST00000527636	ENSE00001260398	10	+
chr11_12902552_12923660	multiexon	TEAD1-001	1	ENSG00000187079	ENST00000527636	ENSE00000890040	7	+	ENSG00000187079	ENST00000527636	ENSE00001260398	10	+
chr11_129551030_129552361	intergenic
chr11_129979324_129980556	multiexon	APLP2-001	1	ENSG00000084234	ENST00000338167	ENSE00003581010	2	+	ENSG00000084234	ENST00000338167	ENSE00003583200	3	+
chr11_13009949_13048585	intergenic	CTC-497E21.3-001	1
chr11_130130751_130131824	monoexon	ZBTB44-001	1	ENSG00000196323	ENST00000525842	ENSE00001382564	2	-
chr11_1307232_1311639	multiexon	TOLLIP-001	1	ENSG00000078902	ENST00000317204	ENSE00003531285	3	-	ENSG00000078902	ENST00000317204	ENSE00000690373	5	-
chr11_1307232_1317024	multiexon	TOLLIP-001	1	ENSG00000078902	ENST00000317204	ENSE00003641486	2	-	ENSG00000078902	ENST00000317204	ENSE00000690373	5	-
chr11_1309854_1311639	multiexon	TOLLIP-001	1	ENSG00000078902	ENST00000317204	ENSE00003531285	3	-	ENSG00000078902	ENST00000317204	ENSE00001319112	4	-
chr11_134063911_134064633	multiexon	NCAPD3-001	1	ENSG00000151503	ENST00000534548	ENSE00001000006	14	-	ENSG00000151503	ENST00000534548	ENSE00001000028	15	-
chr11_13435077_13443385	multiexon	BTBD10-001	1	ENSG00000148925	ENST00000278174	ENSE00003529188	3	-	ENSG00000148925	ENST00000278174	ENSE00003586756	6	-
chr11_14316017_14317401	multiexon	RRAS2-001	1	ENSG00000133818	ENST00000256196	ENSE00003584293	2	-	ENSG00000133818	ENST00000256196	ENSE00003627583	4	-
chr11_14793483_14810788	multiexon	PDE3B-001	1	ENSG00000152270	ENST00000282096	ENSE00001004419	2	+	ENSG00000152270	ENST00000282096	ENSE00001004406	4	+
chr11_14839729_14840755	multiexon	PDE3B-001	1	ENSG00000152270	ENST00000282096	ENSE00003534912	6	+	ENSG00000152270	ENST00000282096	ENSE00001004414	7	+
chr11_14880589_14882912	multiexon	PDE3B-001	1	ENSG00000152270	ENST00000282096	ENSE00001004413	13	+	ENSG00000152270	ENST00000282096	ENSE00001004416	14	+
chr11_17042020_17045203	intronic	OR7E14P-002	2
chr11_17190224_17191353	monoexon	PIK3C2A-002	2	ENSG00000011405	ENST00000533645	ENSE00001248387	2	-
chr11_17358507_17359081	intronic	NUCB2-008	8
chr11_17378198_17378548	monoexon	NCR3LG1-001	1	ENSG00000188211	ENST00000338965	ENSE00001365117	2	+
chr11_17899755_18029623	multiexon	SERGEF-001	1	ENSG00000129158	ENST00000265965	ENSE00003661766	2	-	ENSG00000129158	ENST00000265965	ENSE00003589199	10	-
chr11_17899755_18031686	intronic	SERGEF-001	1
chr11_17981017_18029623	multiexon	SERGEF-001	1	ENSG00000129158	ENST00000265965	ENSE00003661766	2	-	ENSG00000129158	ENST00000265965	ENSE00000886535	9	-
chr11_17981017_18031686	intronic	SERGEF-001	1
chr11_18010144_18029623	multiexon	SERGEF-001	1	ENSG00000129158	ENST00000265965	ENSE00003661766	2	-	ENSG00000129158	ENST00000265965	ENSE00003573571	8	-
chr11_18010144_18031686	intronic	SERGEF-001	1
chr11_18022044_18031686	multiexon	SERGEF-007	7	ENSG00000129158	ENST00000532212	ENSE00002195746	2	-	ENSG00000129158	ENST00000532212	ENSE00003467191	6	-
chr11_18305342_18307006	multiexon	HPS5-001	1	ENSG00000110756	ENST00000349215	ENSE00003458757	20	-	ENSG00000110756	ENST00000349215	ENSE00003655944	21	-
chr11_18305342_18308257	multiexon	HPS5-001	1	ENSG00000110756	ENST00000349215	ENSE00003627456	19	-	ENSG00000110756	ENST00000349215	ENSE00003655944	21	-
chr11_18312989_18313566	monoexon	HPS5-001	1	ENSG00000110756	ENST00000349215	ENSE00003582118	16	-
chr11_18312989_18314523	multiexon	HPS5-001	1	ENSG00000110756	ENST00000349215	ENSE00003472510	15	-	ENSG00000110756	ENST00000349215	ENSE00003582118	16	-
chr11_18536225_18537711	multiexon	TSG101-001	1	ENSG00000074319	ENST00000251968	ENSE00003488053	3	-	ENSG00000074319	ENST00000251968	ENSE00003679322	4	-
chr11_18536225_18541150	multiexon	TSG101-001	1	ENSG00000074319	ENST00000251968	ENSE00003686379	2	-	ENSG00000074319	ENST00000251968	ENSE00003679322	4	-
chr11_18566170_18579877	multiexon	UEVLD-001	1	ENSG00000151116	ENST00000543987	ENSE00003539257	7	-	ENSG00000151116	ENST00000543987	ENSE00003485804	9	-
chr11_19848422_19864469	intronic	NAV2-001	1
chr11_19961207_20005793	multiexon	NAV2-001	1	ENSG00000166833	ENST00000396087	ENSE00001149343	9	+	ENSG00000166833	ENST00000396087	ENSE00001149322	12	+
chr11_19998293_20005793	intronic	NAV2-001	1
chr11_20417349_20419267	multiexon	PRMT3-001	1	ENSG00000185238	ENST00000331079	ENSE00003534033	6	+	ENSG00000185238	ENST00000331079	ENSE00003507093	7	+
chr11_20424465_20429578	multiexon	PRMT3-001	1	ENSG00000185238	ENST00000331079	ENSE00003550456	8	+	ENSG00000185238	ENST00000331079	ENSE00003515447	9	+
chr11_20424465_20448411	multiexon	PRMT3-001	1	ENSG00000185238	ENST00000331079	ENSE00003550456	8	+	ENSG00000185238	ENST00000331079	ENSE00003630415	10	+
chr11_20429457_20473754	multiexon	PRMT3-001	1	ENSG00000185238	ENST00000331079	ENSE00003515447	9	+	ENSG00000185238	ENST00000331079	ENSE00003673129	11	+
chr11_20470387_20486092	intronic	PRMT3-001	1
chr11_20473676_20486092	multiexon	PRMT3-001	1	ENSG00000185238	ENST00000331079	ENSE00003673129	11	+	ENSG00000185238	ENST00000331079	ENSE00003592179	13	+
chr11_27412641_27434407	multiexon	LGR4-001	1	ENSG00000205213	ENST00000379214	ENSE00001784942	2	-	ENSG00000205213	ENST00000379214	ENSE00001480150	4	-
chr11_28056934_28058211	multiexon	KIF18A-001	1	ENSG00000121621	ENST00000263181	ENSE00000988245	14	-	ENSG00000121621	ENST00000263181	ENSE00000988246	15	-
chr11_28080473_28084063	multiexon	KIF18A-001	1	ENSG00000121621	ENST00000263181	ENSE00001098289	12	-	ENSG00000121621	ENST00000263181	ENSE00001098291	13	-
chr11_28098554_28113060	multiexon	KIF18A-001	1	ENSG00000121621	ENST00000263181	ENSE00003617027	4	-	ENSG00000121621	ENST00000263181	ENSE00003620894	10	-
chr11_28232609_28233878	intronic	METTL15-001	1
chr11_28250418_28252532	intronic	METTL15-001	1
chr11_28311753_28318478	multiexon	METTL15-001	1	ENSG00000169519	ENST00000406787	ENSE00003460501	5	+	ENSG00000169519	ENST00000406787	ENSE00001548159	6	+
chr11_28420335_28445911	intronic	RP11-22P4.1-001	1
chr11_28700652_28763455	intergenic	RP11-960D24.1-001	1
chr11_28711107_28763455	intergenic	RP11-115J23.1-001	1
chr11_2991033_3000467	multiexon	NAP1L4-001	1	ENSG00000205531	ENST00000380542	ENSE00001485421	2	-	ENSG00000205531	ENST00000380542	ENSE00003471432	7	-
chr11_31474265_31484852	putativeexon	IMMP1L-003	3	ENSG00000148950	ENST00000532624	ENSE00003630000	2	-	ENSG00000148950	ENST00000532624	ENSE00001956180	5	-
chr11_31477807_31484852	multiexon	IMMP1L-001	1	ENSG00000148950	ENST00000278200	ENSE00003493618	3	-	ENSG00000148950	ENST00000278200	ENSE00003556890	5	-
chr11_32118690_32120074	multiexon	RCN1-001	1	ENSG00000049449	ENST00000532942	ENSE00003463120	2	+	ENSG00000049449	ENST00000532942	ENSE00003464459	3	+
chr11_32610140_32610681	multiexon	EIF3M-001	1	ENSG00000149100	ENST00000531120	ENSE00003587893	3	+	ENSG00000149100	ENST00000531120	ENSE00003682943	4	+
chr11_32610140_32611187	multiexon	EIF3M-001	1	ENSG00000149100	ENST00000531120	ENSE00003587893	3	+	ENSG00000149100	ENST00000531120	ENSE00003487651	5	+
chr11_32611093_32617593	multiexon	EIF3M-001	1	ENSG00000149100	ENST00000531120	ENSE00003487651	5	+	ENSG00000149100	ENST00000531120	ENSE00003604395	8	+
chr11_33127113_33127610	multiexon	CSTF3-001	1	ENSG00000176102	ENST00000323959	ENSE00001285122	6	-	ENSG00000176102	ENST00000323959	ENSE00001285112	8	-
chr11_33163213_33163532	multiexon	CSTF3-001	1	ENSG00000176102	ENST00000323959	ENSE00003608092	2	-	ENSG00000176102	ENST00000323959	ENSE00003688079	3	-
chr11_33163213_33182915	putativeexon	CSTF3-001	1	ENSG00000176102	ENST00000323959	ENSE00002157535	1	-	ENSG00000176102	ENST00000323959	ENSE00003688079	3	-
chr11_33307959_33308498	putativeexon	HIPK3-001	1	ENSG00000110422	ENST00000303296	ENSE00001479558	2	+
chr11_33307959_33309057	monoexon	HIPK3-001	1	ENSG00000110422	ENST00000303296	ENSE00001479558	2	+
chr11_33307959_33350179	multiexon	HIPK3-001	1	ENSG00000110422	ENST00000303296	ENSE00001479558	2	+	ENSG00000110422	ENST00000303296	ENSE00001652501	3	+
chr11_34093273_34098189	multiexon	CAPRIN1-001	1	ENSG00000135387	ENST00000341394	ENSE00003582271	3	+	ENSG00000135387	ENST00000341394	ENSE00000988814	6	+
chr11_34097783_34098189	multiexon	CAPRIN1-001	1	ENSG00000135387	ENST00000341394	ENSE00003682460	5	+	ENSG00000135387	ENST00000341394	ENSE00000988814	6	+
chr11_34969053_34991833	multiexon	PDHX-001	1	ENSG00000110435	ENST00000227868	ENSE00001150239	3	+	ENSG00000110435	ENST00000227868	ENSE00001330369	7	+
chr11_34991686_35006275	multiexon	PDHX-001	1	ENSG00000110435	ENST00000227868	ENSE00001330369	7	+	ENSG00000110435	ENST00000227868	ENSE00000710373	9	+
chr11_35747472_35747711	monoexon	TRIM44-001	1	ENSG00000166326	ENST00000299413	ENSE00003493820	3	+
chr11_36103203_36120011	multiexon	LDLRAD3-001	1	ENSG00000179241	ENST00000315571	ENSE00003562983	3	+	ENSG00000179241	ENST00000315571	ENSE00003468417	4	+
chr11_36248635_36248980	monoexon	LDLRAD3-001	1	ENSG00000179241	ENST00000315571	ENSE00003658795	5	+
chr11_36415396_36424928	intronic	PRR5L-001	1
chr11_36415396_36440853	intronic	PRR5L-001	1
chr11_36415396_36459026	intronic	PRR5L-001	1
chr11_36422547_36424928	multiexon	PRR5L-001	1	ENSG00000135362	ENST00000530639	ENSE00003535422	2	+	ENSG00000135362	ENST00000530639	ENSE00003553342	3	+
chr11_3712577_3714605	multiexon	NUP98-001	1	ENSG00000110713	ENST00000324932	ENSE00001266845	27	-	ENSG00000110713	ENST00000324932	ENSE00001057852	28	-
chr11_3712577_3716836	multiexon	NUP98-001	1	ENSG00000110713	ENST00000324932	ENSE00001057884	26	-	ENSG00000110713	ENST00000324932	ENSE00001057852	28	-
chr11_3723693_3724122	monoexon	NUP98-001	1	ENSG00000110713	ENST00000324932	ENSE00001350501	23	-
chr11_3726430_3727857	multiexon	NUP98-001	1	ENSG00000110713	ENST00000324932	ENSE00000988546	21	-	ENSG00000110713	ENST00000324932	ENSE00001266871	22	-
chr11_3735048_3740780	multiexon	NUP98-001	1	ENSG00000110713	ENST00000324932	ENSE00001057877	18	-	ENSG00000110713	ENST00000324932	ENSE00001057851	19	-
chr11_3792978_3794969	multiexon	NUP98-001	1	ENSG00000110713	ENST00000324932	ENSE00000891053	6	-	ENSG00000110713	ENST00000324932	ENSE00000891055	7	-
chr11_3794862_3797251	multiexon	NUP98-001	1	ENSG00000110713	ENST00000324932	ENSE00001057882	5	-	ENSG00000110713	ENST00000324932	ENSE00000891053	6	-
chr11_3800103_3803375	multiexon	NUP98-001	1	ENSG00000110713	ENST00000324932	ENSE00001331927	2	-	ENSG00000110713	ENST00000324932	ENSE00001266760	4	-
chr11_38113314_38144663	intergenic
chr11_38116674_38144663	intergenic
chr11_38116674_38222598	intergenic
chr11_4123223_4127453	multiexon	RRM1-001	1	ENSG00000167325	ENST00000300738	ENSE00003589547	2	+	ENSG00000167325	ENST00000300738	ENSE00003560199	3	+
chr11_4123223_4133292	multiexon	RRM1-001	1	ENSG00000167325	ENST00000300738	ENSE00003589547	2	+	ENSG00000167325	ENST00000300738	ENSE00003617237	7	+
chr11_4128665_4133292	multiexon	RRM1-001	1	ENSG00000167325	ENST00000300738	ENSE00003493610	4	+	ENSG00000167325	ENST00000300738	ENSE00003617237	7	+
chr11_43436140_43457884	multiexon	TTC17-002	2	ENSG00000052841	ENST00000526774	ENSE00003589554	11	+	ENSG00000052841	ENST00000526774	ENSE00003633749	12	+
chr11_43819870_43861614	multiexon	HSD17B12-001	1	ENSG00000149084	ENST00000278353	ENSE00003507771	4	+	ENSG00000149084	ENST00000278353	ENSE00003644889	9	+
chr11_43852526_43861614	multiexon	HSD17B12-001	1	ENSG00000149084	ENST00000278353	ENSE00003565004	7	+	ENSG00000149084	ENST00000278353	ENSE00003644889	9	+
chr11_44129233_44135851	multiexon	EXT2-001	1	ENSG00000151348	ENST00000533608	ENSE00003545357	2	+	ENSG00000151348	ENST00000533608	ENSE00003519127	4	+
chr11_44129233_44151688	multiexon	EXT2-001	1	ENSG00000151348	ENST00000533608	ENSE00003545357	2	+	ENSG00000151348	ENST00000533608	ENSE00003525485	7	+
chr11_44146339_44151688	multiexon	EXT2-001	1	ENSG00000151348	ENST00000533608	ENSE00000999053	5	+	ENSG00000151348	ENST00000533608	ENSE00003525485	7	+
chr11_45986866_46113774	multiexon	PHF21A-002	2	ENSG00000135365	ENST00000323180	ENSE00001421291	2	-	ENSG00000135365	ENST00000323180	ENSE00003658234	9	-
chr11_46098305_46105853	multiexon	PHF21A-002	2	ENSG00000135365	ENST00000323180	ENSE00003655755	3	-	ENSG00000135365	ENST00000323180	ENSE00003588041	5	-
chr11_46098305_46113774	multiexon	PHF21A-002	2	ENSG00000135365	ENST00000323180	ENSE00001421291	2	-	ENSG00000135365	ENST00000323180	ENSE00003588041	5	-
chr11_46515158_46529920	multiexon	AMBRA1-002	2	ENSG00000110497	ENST00000533727	ENSE00003575382	9	-	ENSG00000110497	ENST00000533727	ENSE00003550468	11	-
chr11_46515158_46534363	multiexon	AMBRA1-001	1	ENSG00000110497	ENST00000534300	ENSE00003576784	8	-	ENSG00000110497	ENST00000534300	ENSE00003550468	10	-
chr11_46804824_46810323	multiexon	CKAP5-002	2	ENSG00000175216	ENST00000529230	ENSE00001641424	16	-	ENSG00000175216	ENST00000529230	ENSE00001657397	18	-
chr11_46810231_46812133	multiexon	CKAP5-002	2	ENSG00000175216	ENST00000529230	ENSE00001672507	14	-	ENSG00000175216	ENST00000529230	ENSE00001641424	16	-
chr11_46811626_46812133	multiexon	CKAP5-002	2	ENSG00000175216	ENST00000529230	ENSE00001672507	14	-	ENSG00000175216	ENST00000529230	ENSE00001770155	15	-
chr11_47187819_47189802	multiexon	ARFGAP2-001	1	ENSG00000149182	ENST00000524782	ENSE00003578145	11	-	ENSG00000149182	ENST00000524782	ENSE00003557489	15	-
chr11_47444125_47444524	multiexon	PSMC3-001	1	ENSG00000165916	ENST00000298852	ENSE00003474104	7	-	ENSG00000165916	ENST00000298852	ENSE00003486874	8	-
chr11_47504247_47510576	multiexon	CELF1-001	1	ENSG00000149187	ENST00000531165	ENSE00003609891	4	-	ENSG00000149187	ENST00000531165	ENSE00003616977	9	-
chr11_47505005_47506075	multiexon	CELF1-001	1	ENSG00000149187	ENST00000531165	ENSE00003660178	7	-	ENSG00000149187	ENST00000531165	ENSE00001624279	8	-
chr11_47505941_47510576	multiexon	CELF1-001	1	ENSG00000149187	ENST00000531165	ENSE00003609891	4	-	ENSG00000149187	ENST00000531165	ENSE00003660178	7	-
chr11_47508302_47510576	multiexon	CELF1-001	1	ENSG00000149187	ENST00000531165	ENSE00003609891	4	-	ENSG00000149187	ENST00000531165	ENSE00001704133	6	-
chr11_47508302_47522484	multiexon	CELF1-001	1	ENSG00000149187	ENST00000531165	ENSE00002184843	2	-	ENSG00000149187	ENST00000531165	ENSE00001704133	6	-
chr11_47774468_47776216	multiexon	FNBP4-001	1	ENSG00000109920	ENST00000263773	ENSE00003492569	3	-	ENSG00000109920	ENST00000263773	ENSE00003591368	4	-
chr11_47804625_47808106	multiexon	NUP160-001	1	ENSG00000030066	ENST00000378460	ENSE00003515915	32	-	ENSG00000030066	ENST00000378460	ENSE00001805074	34	-
chr11_47837031_47841010	multiexon	NUP160-001	1	ENSG00000030066	ENST00000378460	ENSE00003589727	10	-	ENSG00000030066	ENST00000378460	ENSE00000715363	13	-
chr11_47843276_47859175	multiexon	NUP160-001	1	ENSG00000030066	ENST00000378460	ENSE00003576995	5	-	ENSG00000030066	ENST00000378460	ENSE00003582950	9	-
chr11_57258697_57259335	multiexon	SLC43A1-001	1	ENSG00000149150	ENST00000278426	ENSE00003605508	9	-	ENSG00000149150	ENST00000278426	ENSE00003685436	11	-
chr11_59406521_59406856	multiexon	PATL1-001	1	ENSG00000166889	ENST00000300146	ENSE00001269844	17	-	ENSG00000166889	ENST00000300146	ENSE00001269835	18	-
chr11_59426339_59426942	multiexon	PATL1-001	1	ENSG00000166889	ENST00000300146	ENSE00001783089	3	-	ENSG00000166889	ENST00000300146	ENSE00001365809	4	-
chr11_61094251_61097546	multiexon	DDB1-001	1	ENSG00000167986	ENST00000301764	ENSE00003488555	3	-	ENSG00000167986	ENST00000301764	ENSE00003575532	5	-
chr11_61096835_61097546	multiexon	DDB1-001	1	ENSG00000167986	ENST00000301764	ENSE00003488555	3	-	ENSG00000167986	ENST00000301764	ENSE00003691599	4	-
chr11_61133517_61135470	multiexon	TMEM138-001	1	ENSG00000149483	ENST00000278826	ENSE00003693469	3	+	ENSG00000149483	ENST00000278826	ENSE00003605567	4	+
chr11_61205097_61205585	multiexon	RP11-286N22.8-001	1	ENSG00000256591	ENST00000544025	ENSE00003514891	2	+	ENSG00000256591	ENST00000544025	ENSE00003544279	3	+
chr11_61205097_61205585	multiexon	SDHAF2-001	1	ENSG00000167985	ENST00000301761	ENSE00003475244	2	+	ENSG00000167985	ENST00000301761	ENSE00003629726	3	+
chr11_62406455_62407203	multiexon	GANAB-001	1	ENSG00000089597	ENST00000356638	ENSE00003465153	2	-	ENSG00000089597	ENST00000356638	ENSE00003503823	4	-
chr11_62549366_62550297	multiexon	TAF6L-001	1	ENSG00000162227	ENST00000294168	ENSE00003600722	7	+	ENSG00000162227	ENST00000294168	ENSE00001063530	9	+
chr11_62621273_62622688	multiexon	SNHG1-001	1	ENSG00000255717	ENST00000540725	ENSE00002217523	2	-	ENSG00000255717	ENST00000540725	ENSE00002250661	6	-
chr11_62638217_62639141	multiexon	SLC3A2-001	1	ENSG00000168003	ENST00000377890	ENSE00002508139	2	+	ENSG00000168003	ENST00000377890	ENSE00002435757	3	+
chr11_62649365_62655690	multiexon	SLC3A2-001	1	ENSG00000168003	ENST00000377890	ENSE00003610068	5	+	ENSG00000168003	ENST00000377890	ENSE00003659239	11	+
chr11_62650380_62653080	multiexon	SLC3A2-001	1	ENSG00000168003	ENST00000377890	ENSE00003538765	6	+	ENSG00000168003	ENST00000377890	ENSE00003661225	10	+
chr11_62652649_62653080	multiexon	SLC3A2-001	1	ENSG00000168003	ENST00000377890	ENSE00003490321	9	+	ENSG00000168003	ENST00000377890	ENSE00003661225	10	+
chr11_63419408_63420047	multiexon	ATL3-001	1	ENSG00000184743	ENST00000398868	ENSE00002521282	4	-	ENSG00000184743	ENST00000398868	ENSE00001319139	5	-
chr11_63426233_63426724	multiexon	ATL3-001	1	ENSG00000184743	ENST00000398868	ENSE00003566817	2	-	ENSG00000184743	ENST00000398868	ENSE00001316752	3	-
chr11_6344815_6345265	intergenic
chr11_63662631_63663105	multiexon	MARK2-001	1	ENSG00000072518	ENST00000508192	ENSE00003576376	2	+	ENSG00000072518	ENST00000508192	ENSE00002503318	3	+
chr11_63918711_63919865	multiexon	MACROD1-001	1	ENSG00000133315	ENST00000255681	ENSE00003467407	2	-	ENSG00000133315	ENST00000255681	ENSE00003523739	3	-
chr11_63960550_63962092	multiexon	STIP1-001	1	ENSG00000168439	ENST00000305218	ENSE00003558482	2	+	ENSG00000168439	ENST00000305218	ENSE00003684816	4	+
chr11_64627396_64627808	monoexon	EHD1-001	1	ENSG00000110047	ENST00000320631	ENSE00001063417	3	-
chr11_65061624_65063461	multiexon	POLA2-001	1	ENSG00000014138	ENST00000265465	ENSE00003477223	14	+	ENSG00000014138	ENST00000265465	ENSE00003465841	17	+
chr11_65202524_65205128	putativeexon	NEAT1-001	1	ENSG00000245532	ENST00000501122	ENSE00001961965	1	+
chr11_65269792_65272066	putativeexon	MALAT1-001	1	ENSG00000251562	ENST00000534336	ENSE00002199760	1	+
chr11_65271200_65272066	putativeexon	MALAT1-001	1	ENSG00000251562	ENST00000534336	ENSE00002199760	1	+
chr11_65661485_65664477	multiexon	FOSL1-001	1	ENSG00000175592	ENST00000312562	ENSE00001190318	2	-	ENSG00000175592	ENST00000312562	ENSE00003673255	3	-
chr11_66254011_66255478	multiexon	DPP3-001	1	ENSG00000254986	ENST00000532677	ENSE00001188868	4	+	ENSG00000254986	ENST00000532677	ENSE00001188859	6	+
chr11_66407149_66407594	putativeexon	RBM4-003	3	ENSG00000173933	ENST00000409406	ENSE00001589068	1	+
chr11_66407171_66407594	monoexon	RBM14-RBM4-003	3	ENSG00000248643	ENST00000421355	ENSE00003636023	2	+
chr11_66407171_66407594	monoexon	RBM4-001	1	ENSG00000173933	ENST00000310092	ENSE00003513724	2	+
chr11_66410921_66411611	monoexon	RBM4-001	1	ENSG00000173933	ENST00000310092	ENSE00003639911	3	+
chr11_66410921_66411611	putativeexon	RBM14-RBM4-003	3	ENSG00000248643	ENST00000421355	ENSE00003518734	3	+
chr11_66523824_66526567	multiexon	C11orf80-001	1	ENSG00000173715	ENST00000532565	ENSE00003641670	3	+	ENSG00000173715	ENST00000532565	ENSE00003499528	4	+
chr11_66583524_66590145	multiexon	C11orf80-001	1	ENSG00000173715	ENST00000532565	ENSE00003616970	11	+	ENSG00000173715	ENST00000532565	ENSE00003589251	13	+
chr11_66583524_66595835	multiexon	C11orf80-001	1	ENSG00000173715	ENST00000532565	ENSE00003616970	11	+	ENSG00000173715	ENST00000532565	ENSE00003636305	14	+
chr11_66589114_66590145	multiexon	C11orf80-001	1	ENSG00000173715	ENST00000532565	ENSE00003518765	12	+	ENSG00000173715	ENST00000532565	ENSE00003589251	13	+
chr11_66589114_66595835	multiexon	C11orf80-001	1	ENSG00000173715	ENST00000532565	ENSE00003518765	12	+	ENSG00000173715	ENST00000532565	ENSE00003636305	14	+
chr11_66982811_66986874	multiexon	KDM2A-001	1	ENSG00000173120	ENST00000398645	ENSE00003586141	7	+	ENSG00000173120	ENST00000398645	ENSE00003572517	10	+
chr11_66985202_66995634	multiexon	KDM2A-001	1	ENSG00000173120	ENST00000398645	ENSE00003634370	9	+	ENSG00000173120	ENST00000398645	ENSE00003547964	11	+
chr11_68115315_68115711	monoexon	LRP5-001	1	ENSG00000162337	ENST00000294304	ENSE00000991969	2	+
chr11_68115315_68125315	multiexon	LRP5-001	1	ENSG00000162337	ENST00000294304	ENSE00000991969	2	+	ENSG00000162337	ENST00000294304	ENSE00001166576	3	+
chr11_68115315_68131411	multiexon	LRP5-001	1	ENSG00000162337	ENST00000294304	ENSE00000991969	2	+	ENSG00000162337	ENST00000294304	ENSE00001166549	4	+
chr11_68115315_68133170	multiexon	LRP5-001	1	ENSG00000162337	ENST00000294304	ENSE00000991969	2	+	ENSG00000162337	ENST00000294304	ENSE00001166545	5	+
chr11_68125118_68133170	multiexon	LRP5-001	1	ENSG00000162337	ENST00000294304	ENSE00001166576	3	+	ENSG00000162337	ENST00000294304	ENSE00001166545	5	+
chr11_68153784_68157520	multiexon	LRP5-001	1	ENSG00000162337	ENST00000294304	ENSE00001642589	6	+	ENSG00000162337	ENST00000294304	ENSE00001783344	7	+
chr11_68190957_68193655	multiexon	LRP5-001	1	ENSG00000162337	ENST00000294304	ENSE00003542163	14	+	ENSG00000162337	ENST00000294304	ENSE00003518921	16	+
chr11_68272613_68305359	multiexon	PPP6R3-003	3	ENSG00000110075	ENST00000265636	ENSE00001411277	2	+	ENSG00000110075	ENST00000265636	ENSE00003566103	4	+
chr11_68282496_68287119	multiexon	PPP6R3-011	11	ENSG00000110075	ENST00000529344	ENSE00002161744	2	+	ENSG00000110075	ENST00000529344	ENSE00001378469	3	+
chr11_68286969_68305359	multiexon	PPP6R3-001	1	ENSG00000110075	ENST00000393800	ENSE00001378469	2	+	ENSG00000110075	ENST00000393800	ENSE00003566103	3	+
chr11_68305127_68305359	monoexon	PPP6R3-001	1	ENSG00000110075	ENST00000393800	ENSE00003566103	3	+
chr11_68334482_68343511	multiexon	PPP6R3-001	1	ENSG00000110075	ENST00000393800	ENSE00003577137	10	+	ENSG00000110075	ENST00000393800	ENSE00000824110	14	+
chr11_68527037_68529155	multiexon	CPT1A-001	1	ENSG00000110090	ENST00000540367	ENSE00001117296	15	-	ENSG00000110090	ENST00000540367	ENSE00001117295	17	-
chr11_68571468_68575106	multiexon	CPT1A-001	1	ENSG00000110090	ENST00000540367	ENSE00001117292	3	-	ENSG00000110090	ENST00000540367	ENSE00000737385	4	-
chr11_68571468_68580044	multiexon	CPT1A-001	1	ENSG00000110090	ENST00000540367	ENSE00001117294	2	-	ENSG00000110090	ENST00000540367	ENSE00000737385	4	-
chr11_70013348_70026162	multiexon	ANO1-001	1	ENSG00000131620	ENST00000355303	ENSE00003556435	21	+	ENSG00000131620	ENST00000355303	ENSE00003535366	23	+
chr11_70200407_70202360	multiexon	PPFIA1-001	1	ENSG00000131626	ENST00000253925	ENSE00003515258	17	+	ENSG00000131626	ENST00000253925	ENSE00003669202	19	+
chr11_70200407_70208594	multiexon	PPFIA1-001	1	ENSG00000131626	ENST00000253925	ENSE00003515258	17	+	ENSG00000131626	ENST00000253925	ENSE00003686333	21	+
chr11_70505933_70507783	putativeexon	SHANK2-001	1	ENSG00000162105	ENST00000409161	ENSE00001587725	1	-	ENSG00000162105	ENST00000409161	ENSE00003464170	2	-
chr11_71693807_71701763	multiexon	RNF121-001	1	ENSG00000137522	ENST00000361756	ENSE00003651700	4	+	ENSG00000137522	ENST00000361756	ENSE00003685586	6	+
chr11_72468812_72470426	multiexon	STARD10-001	1	ENSG00000214530	ENST00000543304	ENSE00003566916	4	-	ENSG00000214530	ENST00000543304	ENSE00001339045	6	-
chr11_72578910_72600990	multiexon	FCHSD2-001	1	ENSG00000137478	ENST00000311172	ENSE00001119335	10	-	ENSG00000137478	ENST00000311172	ENSE00001119331	12	-
chr11_72578910_72613683	multiexon	FCHSD2-001	1	ENSG00000137478	ENST00000311172	ENSE00000990257	9	-	ENSG00000137478	ENST00000311172	ENSE00001119331	12	-
chr11_72598515_72600990	multiexon	FCHSD2-001	1	ENSG00000137478	ENST00000311172	ENSE00001119335	10	-	ENSG00000137478	ENST00000311172	ENSE00001119326	11	-
chr11_72598515_72613683	multiexon	FCHSD2-001	1	ENSG00000137478	ENST00000311172	ENSE00000990257	9	-	ENSG00000137478	ENST00000311172	ENSE00001119326	11	-
chr11_72695133_72700142	multiexon	FCHSD2-001	1	ENSG00000137478	ENST00000311172	ENSE00003594458	5	-	ENSG00000137478	ENST00000311172	ENSE00001260311	7	-
chr11_73418465_73429763	multiexon	RAB6A-002	2	ENSG00000175582	ENST00000336083	ENSE00001184543	4	-	ENSG00000175582	ENST00000336083	ENSE00003629629	6	-
chr11_73418465_73429935	multiexon	RAB6A-001	1	ENSG00000175582	ENST00000310653	ENSE00001358762	4	-	ENSG00000175582	ENST00000310653	ENSE00003629629	6	-
chr11_73418465_73431944	multiexon	RAB6A-001	1	ENSG00000175582	ENST00000310653	ENSE00001759909	3	-	ENSG00000175582	ENST00000310653	ENSE00003629629	6	-
chr11_73620444_73630077	multiexon	PAAF1-001	1	ENSG00000175575	ENST00000310571	ENSE00001184418	7	+	ENSG00000175575	ENST00000310571	ENSE00001184409	10	+
chr11_73829273_73834180	multiexon	C2CD3-001	1	ENSG00000168014	ENST00000313663	ENSE00003538158	8	-	ENSG00000168014	ENST00000313663	ENSE00003619528	9	-
chr11_73843889_73844602	multiexon	C2CD3-001	1	ENSG00000168014	ENST00000313663	ENSE00003547010	6	-	ENSG00000168014	ENST00000313663	ENSE00003593871	7	-
chr11_74500671_74528759	multiexon	RNF169-001	1	ENSG00000166439	ENST00000299563	ENSE00001243141	2	+	ENSG00000166439	ENST00000299563	ENSE00001103019	4	+
chr11_74521229_74528759	multiexon	RNF169-001	1	ENSG00000166439	ENST00000299563	ENSE00001103033	3	+	ENSG00000166439	ENST00000299563	ENSE00001103019	4	+
chr11_74617284_74618318	multiexon	XRRA1-001	1	ENSG00000166435	ENST00000340360	ENSE00003535437	9	-	ENSG00000166435	ENST00000340360	ENSE00003603215	10	-
chr11_755879_760253	multiexon	TALDO1-001	1	ENSG00000177156	ENST00000319006	ENSE00003595520	2	+	ENSG00000177156	ENST00000319006	ENSE00003626202	4	+
chr11_75590923_75623083	multiexon	UVRAG-001	1	ENSG00000198382	ENST00000356136	ENSE00003507207	4	+	ENSG00000198382	ENST00000356136	ENSE00001039968	6	+
chr11_75715049_75728024	multiexon	UVRAG-001	1	ENSG00000198382	ENST00000356136	ENSE00003479735	9	+	ENSG00000198382	ENST00000356136	ENSE00003658476	12	+
chr11_75718578_75728024	multiexon	UVRAG-001	1	ENSG00000198382	ENST00000356136	ENSE00003647343	10	+	ENSG00000198382	ENST00000356136	ENSE00003658476	12	+
chr11_76224430_76227356	multiexon	C11orf30-001	1	ENSG00000158636	ENST00000529032	ENSE00001102425	9	+	ENSG00000158636	ENST00000529032	ENSE00001102392	10	+
chr11_76670023_76709865	multiexon	ACER3-001	1	ENSG00000078124	ENST00000532485	ENSE00003618406	3	+	ENSG00000078124	ENST00000532485	ENSE00003555194	7	+
chr11_76687333_76709865	multiexon	ACER3-001	1	ENSG00000078124	ENST00000532485	ENSE00003560804	4	+	ENSG00000078124	ENST00000532485	ENSE00003555194	7	+
chr11_76696687_76709865	multiexon	ACER3-001	1	ENSG00000078124	ENST00000532485	ENSE00003639191	5	+	ENSG00000078124	ENST00000532485	ENSE00003555194	7	+
chr11_77085373_77091039	multiexon	PAK1-001	1	ENSG00000149269	ENST00000356341	ENSE00003595091	3	-	ENSG00000149269	ENST00000356341	ENSE00003548604	5	-
chr11_77090286_77091039	multiexon	PAK1-001	1	ENSG00000149269	ENST00000356341	ENSE00003595091	3	-	ENSG00000149269	ENST00000356341	ENSE00003631938	4	-
chr11_77330651_77336863	multiexon	CLNS1A-001	1	ENSG00000074201	ENST00000525428	ENSE00003533923	3	-	ENSG00000074201	ENST00000525428	ENSE00003700999	6	-
chr11_77330651_77340944	multiexon	CLNS1A-001	1	ENSG00000074201	ENST00000525428	ENSE00001040439	2	-	ENSG00000074201	ENST00000525428	ENSE00003700999	6	-
chr11_77333545_77336863	multiexon	CLNS1A-001	1	ENSG00000074201	ENST00000525428	ENSE00003533923	3	-	ENSG00000074201	ENST00000525428	ENSE00003540064	5	-
chr11_77336008_77336863	multiexon	CLNS1A-001	1	ENSG00000074201	ENST00000525428	ENSE00003533923	3	-	ENSG00000074201	ENST00000525428	ENSE00003488474	4	-
chr11_77336008_77340944	multiexon	CLNS1A-001	1	ENSG00000074201	ENST00000525428	ENSE00001040439	2	-	ENSG00000074201	ENST00000525428	ENSE00003488474	4	-
chr11_77394755_77404656	multiexon	RSF1-001	1	ENSG00000048649	ENST00000308488	ENSE00003652732	8	-	ENSG00000048649	ENST00000308488	ENSE00001040492	11	-
chr11_77396150_77404656	multiexon	RSF1-001	1	ENSG00000048649	ENST00000308488	ENSE00003652732	8	-	ENSG00000048649	ENST00000308488	ENSE00001040478	10	-
chr11_77433733_77436744	intronic	RSF1-001	1
chr11_77435393_77436744	intronic	RSF1-001	1
chr11_77666988_77672184	multiexon	INTS4-001	1	ENSG00000149262	ENST00000534064	ENSE00003667799	5	-	ENSG00000149262	ENST00000534064	ENSE00003482013	8	-
chr11_77823696_77832220	multiexon	ALG8-001	1	ENSG00000159063	ENST00000299626	ENSE00001103524	4	-	ENSG00000159063	ENST00000299626	ENSE00003681314	8	-
chr11_77824932_77832220	multiexon	ALG8-001	1	ENSG00000159063	ENST00000299626	ENSE00001103524	4	-	ENSG00000159063	ENST00000299626	ENSE00003575058	7	-
chr11_77830228_77838482	multiexon	ALG8-001	1	ENSG00000159063	ENST00000299626	ENSE00003612997	2	-	ENSG00000159063	ENST00000299626	ENSE00003471595	5	-
chr11_78176922_78189729	multiexon	NARS2-001	1	ENSG00000137513	ENST00000281038	ENSE00003513400	8	-	ENSG00000137513	ENST00000281038	ENSE00003614361	11	-
chr11_78176922_78204241	multiexon	NARS2-001	1	ENSG00000137513	ENST00000281038	ENSE00001103671	7	-	ENSG00000137513	ENST00000281038	ENSE00003614361	11	-
chr11_78180293_78204241	multiexon	NARS2-001	1	ENSG00000137513	ENST00000281038	ENSE00001103671	7	-	ENSG00000137513	ENST00000281038	ENSE00003580008	10	-
chr11_78270585_78282489	multiexon	NARS2-001	1	ENSG00000137513	ENST00000281038	ENSE00003537842	2	-	ENSG00000137513	ENST00000281038	ENSE00003522365	5	-
chr11_82560091_82571159	multiexon	PRCP-001	1	ENSG00000137509	ENST00000313010	ENSE00003554074	2	-	ENSG00000137509	ENST00000313010	ENSE00000927712	6	-
chr11_82917100_82922472	multiexon	ANKRD42-001	1	ENSG00000137494	ENST00000393392	ENSE00003469271	3	+	ENSG00000137494	ENST00000393392	ENSE00000989090	5	+
chr11_82984690_82989872	multiexon	CCDC90B-001	1	ENSG00000137500	ENST00000529689	ENSE00003551859	3	-	ENSG00000137500	ENST00000529689	ENSE00003574461	7	-
chr11_847201_850367	multiexon	TSPAN4-001	1	ENSG00000214063	ENST00000397397	ENSE00001301323	2	+	ENSG00000214063	ENST00000397397	ENSE00003640300	3	+
chr11_85685751_85695016	multiexon	PICALM-001	1	ENSG00000073921	ENST00000526033	ENSE00000989277	14	-	ENSG00000073921	ENST00000526033	ENSE00003486140	19	-
chr11_85692172_85693046	multiexon	PICALM-001	1	ENSG00000073921	ENST00000526033	ENSE00001328176	15	-	ENSG00000073921	ENST00000526033	ENSE00000797897	17	-
chr11_85692172_85695016	multiexon	PICALM-001	1	ENSG00000073921	ENST00000526033	ENSE00000989277	14	-	ENSG00000073921	ENST00000526033	ENSE00000797897	17	-
chr11_85692788_85695016	multiexon	PICALM-001	1	ENSG00000073921	ENST00000526033	ENSE00000989277	14	-	ENSG00000073921	ENST00000526033	ENSE00003557667	16	-
chr11_85692788_85701442	multiexon	PICALM-005	5	ENSG00000073921	ENST00000393346	ENSE00000989276	13	-	ENSG00000073921	ENST00000393346	ENSE00003557667	16	-
chr11_85692788_85707972	multiexon	PICALM-001	1	ENSG00000073921	ENST00000526033	ENSE00000797902	12	-	ENSG00000073921	ENST00000526033	ENSE00003557667	16	-
chr11_85707869_85714494	multiexon	PICALM-001	1	ENSG00000073921	ENST00000526033	ENSE00003594776	9	-	ENSG00000073921	ENST00000526033	ENSE00000797902	12	-
chr11_85707869_85742653	multiexon	PICALM-001	1	ENSG00000073921	ENST00000526033	ENSE00003652321	2	-	ENSG00000073921	ENST00000526033	ENSE00000797902	12	-
chr11_85718585_85742653	multiexon	PICALM-001	1	ENSG00000073921	ENST00000526033	ENSE00003652321	2	-	ENSG00000073921	ENST00000526033	ENSE00003607692	8	-
chr11_85722073_85726006	multiexon	PICALM-001	1	ENSG00000073921	ENST00000526033	ENSE00003654358	5	-	ENSG00000073921	ENST00000526033	ENSE00003607483	7	-
chr11_85722073_85742653	multiexon	PICALM-001	1	ENSG00000073921	ENST00000526033	ENSE00003652321	2	-	ENSG00000073921	ENST00000526033	ENSE00003607483	7	-
chr11_85961338_85963282	multiexon	EED-001	1	ENSG00000074266	ENST00000263360	ENSE00003615608	2	+	ENSG00000074266	ENST00000263360	ENSE00003587936	3	+
chr11_85961338_85967554	multiexon	EED-001	1	ENSG00000074266	ENST00000263360	ENSE00003615608	2	+	ENSG00000074266	ENST00000263360	ENSE00003609161	5	+
chr11_85966264_85967554	multiexon	EED-001	1	ENSG00000074266	ENST00000263360	ENSE00003560025	4	+	ENSG00000074266	ENST00000263360	ENSE00003609161	5	+
chr11_85966264_85968638	multiexon	EED-001	1	ENSG00000074266	ENST00000263360	ENSE00003560025	4	+	ENSG00000074266	ENST00000263360	ENSE00003516186	6	+
chr11_86267595_86270865	multiexon	ME3-001	1	ENSG00000151376	ENST00000393324	ENSE00003617809	2	-	ENSG00000151376	ENST00000393324	ENSE00003594172	3	-
chr11_86778736_86782657	multiexon	TMEM135-001	1	ENSG00000166575	ENST00000305494	ENSE00003497770	2	+	ENSG00000166575	ENST00000305494	ENSE00003636753	3	+
chr11_86778736_86784012	intronic	TMEM135-001	1
chr11_86778736_86786828	intronic	TMEM135-001	1
chr11_86778736_86802437	multiexon	TMEM135-001	1	ENSG00000166575	ENST00000305494	ENSE00003497770	2	+	ENSG00000166575	ENST00000305494	ENSE00003524054	4	+
chr11_86778736_86868448	multiexon	TMEM135-001	1	ENSG00000166575	ENST00000305494	ENSE00003497770	2	+	ENSG00000166575	ENST00000305494	ENSE00003531210	5	+
chr11_86868383_86869813	intronic	TMEM135-001	1
chr11_8693444_8696430	intergenic
chr11_883148_884169	multiexon	CHID1-001	1	ENSG00000177830	ENST00000323578	ENSE00003594152	9	-	ENSG00000177830	ENST00000323578	ENSE00003592892	10	-
chr11_8987451_8989588	multiexon	TMEM9B-AS1-001	1	ENSG00000254860	ENST00000525484	ENSE00002178997	2	+	ENSG00000254860	ENST00000525484	ENSE00002190401	4	+
chr11_9069490_9074762	multiexon	SCUBE2-001	1	ENSG00000175356	ENST00000520467	ENSE00001187366	12	-	ENSG00000175356	ENST00000520467	ENSE00001187358	15	-
chr11_9199679_9200620	multiexon	DENND5A-001	1	ENSG00000184014	ENST00000328194	ENSE00001309969	7	-	ENSG00000184014	ENST00000328194	ENSE00001294463	8	-
chr11_9225207_9229179	multiexon	DENND5A-001	1	ENSG00000184014	ENST00000328194	ENSE00001323631	2	-	ENSG00000184014	ENST00000328194	ENSE00001328433	4	-
chr11_9304918_9309353	putativeexon	TMEM41B-001	1	ENSG00000166471	ENST00000528080	ENSE00003575570	5	-	ENSG00000166471	ENST00000528080	ENSE00002176576	7	-
chr11_9304918_9316934	putativeexon	TMEM41B-001	1	ENSG00000166471	ENST00000528080	ENSE00001123130	3	-	ENSG00000166471	ENST00000528080	ENSE00002176576	7	-
chr11_9304918_9321248	putativeexon	TMEM41B-001	1	ENSG00000166471	ENST00000528080	ENSE00001123136	2	-	ENSG00000166471	ENST00000528080	ENSE00002176576	7	-
chr11_9308002_9316934	multiexon	TMEM41B-001	1	ENSG00000166471	ENST00000528080	ENSE00001123130	3	-	ENSG00000166471	ENST00000528080	ENSE00003564015	6	-
chr11_9308002_9321248	multiexon	TMEM41B-001	1	ENSG00000166471	ENST00000528080	ENSE00001123136	2	-	ENSG00000166471	ENST00000528080	ENSE00003564015	6	-
chr11_9309249_9316934	multiexon	TMEM41B-001	1	ENSG00000166471	ENST00000528080	ENSE00001123130	3	-	ENSG00000166471	ENST00000528080	ENSE00003575570	5	-
chr11_93435626_93440063	multiexon	KIAA1731-001	1	ENSG00000166004	ENST00000325212	ENSE00003485084	16	+	ENSG00000166004	ENST00000325212	ENSE00001098890	18	+
chr11_94178976_94180604	multiexon	MRE11A-001	1	ENSG00000020922	ENST00000323929	ENSE00000842844	15	-	ENSG00000020922	ENST00000323929	ENSE00000842843	16	-
chr11_94219090_94224131	multiexon	MRE11A-001	1	ENSG00000020922	ENST00000323929	ENSE00003521873	3	-	ENSG00000020922	ENST00000323929	ENSE00003643226	4	-
chr11_9430033_9435958	multiexon	IPO7-001	1	ENSG00000205339	ENST00000379719	ENSE00003677130	3	+	ENSG00000205339	ENST00000379719	ENSE00001482277	5	+
chr11_9430033_9438695	multiexon	IPO7-001	1	ENSG00000205339	ENST00000379719	ENSE00003677130	3	+	ENSG00000205339	ENST00000379719	ENSE00001482276	6	+
chr11_9430033_9442245	multiexon	IPO7-001	1	ENSG00000205339	ENST00000379719	ENSE00003677130	3	+	ENSG00000205339	ENST00000379719	ENSE00001482273	8	+
chr11_9441958_9446809	multiexon	IPO7-001	1	ENSG00000205339	ENST00000379719	ENSE00001482274	7	+	ENSG00000205339	ENST00000379719	ENSE00001482263	12	+
chr11_9450087_9452550	multiexon	IPO7-001	1	ENSG00000205339	ENST00000379719	ENSE00001482262	13	+	ENSG00000205339	ENST00000379719	ENSE00001482258	16	+
chr11_9451221_9452550	multiexon	IPO7-001	1	ENSG00000205339	ENST00000379719	ENSE00001482259	15	+	ENSG00000205339	ENST00000379719	ENSE00001482258	16	+
chr11_9451221_9455393	multiexon	IPO7-001	1	ENSG00000205339	ENST00000379719	ENSE00001482259	15	+	ENSG00000205339	ENST00000379719	ENSE00001482255	18	+
chr11_9462002_9463744	multiexon	IPO7-001	1	ENSG00000205339	ENST00000379719	ENSE00001482248	23	+	ENSG00000205339	ENST00000379719	ENSE00001482247	24	+
chr11_9492849_9501093	multiexon	ZNF143-001	1	ENSG00000166478	ENST00000396602	ENSE00002140238	2	+	ENSG00000166478	ENST00000396602	ENSE00001103361	7	+
chr11_9597435_9598810	multiexon	WEE1-001	1	ENSG00000166483	ENST00000450114	ENSE00003462644	2	+	ENSG00000166483	ENST00000450114	ENSE00001221092	5	+
chr11_9983504_10011142	multiexon	SBF2-001	1	ENSG00000133812	ENST00000256190	ENSE00003589548	13	-	ENSG00000133812	ENST00000256190	ENSE00003679273	16	-
chr12_100491143_100492319	multiexon	UHRF1BP1L-001	1	ENSG00000111647	ENST00000279907	ENSE00001190486	5	-	ENSG00000111647	ENST00000279907	ENSE00000937790	6	-
chr12_100598718_100601564	multiexon	ACTR6-001	1	ENSG00000075089	ENST00000188312	ENSE00003624458	2	+	ENSG00000075089	ENST00000188312	ENSE00003691303	4	+
chr12_100676721_100691953	multiexon	SCYL2-001	1	ENSG00000136021	ENST00000360820	ENSE00003491005	2	+	ENSG00000136021	ENST00000360820	ENSE00003611836	4	+
chr12_100985514_101005919	multiexon	GAS2L3-001	1	ENSG00000139354	ENST00000547754	ENSE00002370999	2	+	ENSG00000139354	ENST00000547754	ENSE00003694255	6	+
chr12_101413812_101442179	multiexon	ANO4-001	1	ENSG00000151572	ENST00000392979	ENSE00003509128	8	+	ENSG00000151572	ENST00000392979	ENSE00003642831	13	+
chr12_101727079_101728282	multiexon	UTP20-001	1	ENSG00000120800	ENST00000261637	ENSE00000922780	28	+	ENSG00000120800	ENST00000261637	ENSE00000922781	29	+
chr12_102107868_102110590	multiexon	CHPT1-001	1	ENSG00000111666	ENST00000229266	ENSE00003672502	2	+	ENSG00000111666	ENST00000229266	ENSE00003681037	4	+
chr12_102107868_102114032	multiexon	CHPT1-001	1	ENSG00000111666	ENST00000229266	ENSE00003672502	2	+	ENSG00000111666	ENST00000229266	ENSE00003627795	5	+
chr12_102291641_102295211	multiexon	DRAM1-001	1	ENSG00000136048	ENST00000258534	ENSE00003514426	2	+	ENSG00000136048	ENST00000258534	ENSE00003684161	3	+
chr12_102301964_102308010	multiexon	DRAM1-001	1	ENSG00000136048	ENST00000258534	ENSE00000922844	4	+	ENSG00000136048	ENST00000258534	ENSE00003680494	5	+
chr12_102301964_102313979	multiexon	DRAM1-001	1	ENSG00000136048	ENST00000258534	ENSE00000922844	4	+	ENSG00000136048	ENST00000258534	ENSE00003607345	6	+
chr12_102419752_102439897	multiexon	CCDC53-001	1	ENSG00000120860	ENST00000240079	ENSE00003528244	3	-	ENSG00000120860	ENST00000240079	ENSE00003521224	6	-
chr12_102433646_102439897	multiexon	CCDC53-001	1	ENSG00000120860	ENST00000240079	ENSE00003528244	3	-	ENSG00000120860	ENST00000240079	ENSE00003594910	5	-
chr12_102433646_102444069	multiexon	CCDC53-004	4	ENSG00000120860	ENST00000535501	ENSE00003499797	3	-	ENSG00000120860	ENST00000535501	ENSE00003678013	6	-
chr12_102542008_102559661	multiexon	PARPBP-001	1	ENSG00000185480	ENST00000358383	ENSE00003573519	3	+	ENSG00000185480	ENST00000358383	ENSE00003495299	6	+
chr12_104200100_104208899	multiexon	NT5DC3-001	1	ENSG00000111696	ENST00000392876	ENSE00002323762	2	-	ENSG00000111696	ENST00000392876	ENSE00001000561	4	-
chr12_104514178_104517201	multiexon	NFYB-001	1	ENSG00000120837	ENST00000240055	ENSE00003630417	5	-	ENSG00000120837	ENST00000240055	ENSE00001104711	7	-
chr12_104682709_104683320	multiexon	TXNRD1-013	13	ENSG00000198431	ENST00000531689	ENSE00003595747	2	+	ENSG00000198431	ENST00000531689	ENSE00002156581	3	+
chr12_104712691_104715094	multiexon	TXNRD1-001	1	ENSG00000198431	ENST00000525566	ENSE00001508565	8	+	ENSG00000198431	ENST00000525566	ENSE00001508563	10	+
chr12_105303433_105322472	intronic	SLC41A2-001	1
chr12_105321751_105322472	intronic	SLC41A2-001	1
chr12_105385490_105389804	intronic	C12orf45-001	1
chr12_106477642_106480663	multiexon	NUAK1-001	1	ENSG00000074590	ENST00000261402	ENSE00001099261	3	-	ENSG00000074590	ENST00000261402	ENSE00001099255	4	-
chr12_106477642_106500303	multiexon	NUAK1-001	1	ENSG00000074590	ENST00000261402	ENSE00001099252	2	-	ENSG00000074590	ENST00000261402	ENSE00001099255	4	-
chr12_106770137_106773917	multiexon	POLR3B-001	1	ENSG00000013503	ENST00000228347	ENSE00001099436	7	+	ENSG00000013503	ENST00000228347	ENSE00001099347	9	+
chr12_107177775_107219598	multiexon	RIC8B-001	1	ENSG00000111785	ENST00000392837	ENSE00003525714	2	+	ENSG00000111785	ENST00000392837	ENSE00003553505	4	+
chr12_107236367_107245372	multiexon	RIC8B-001	1	ENSG00000111785	ENST00000392837	ENSE00003535310	5	+	ENSG00000111785	ENST00000392837	ENSE00003609511	7	+
chr12_107914264_107937916	multiexon	BTBD11-001	1	ENSG00000151136	ENST00000490090	ENSE00002340564	2	+	ENSG00000151136	ENST00000490090	ENSE00002411070	3	+
chr12_108136974_108140201	multiexon	PRDM4-001	1	ENSG00000110851	ENST00000228437	ENSE00003671644	6	-	ENSG00000110851	ENST00000228437	ENSE00003659252	8	-
chr12_109046048_109048186	multiexon	CORO1C-001	1	ENSG00000110880	ENST00000261401	ENSE00003490068	7	-	ENSG00000110880	ENST00000261401	ENSE00003617618	8	-
chr12_109072048_109095099	multiexon	CORO1C-001	1	ENSG00000110880	ENST00000261401	ENSE00003570790	2	-	ENSG00000110880	ENST00000261401	ENSE00003531501	3	-
chr12_109210814_109217137	multiexon	SSH1-001	1	ENSG00000084112	ENST00000326495	ENSE00003691806	3	-	ENSG00000084112	ENST00000326495	ENSE00003557506	5	-
chr12_109212025_109212334	intronic	SSH1-001	1
chr12_109212025_109217137	multiexon	SSH1-001	1	ENSG00000084112	ENST00000326495	ENSE00003691806	3	-	ENSG00000084112	ENST00000326495	ENSE00003492984	4	-
chr12_109242811_109246454	intronic	SSH1-001	1
chr12_109509417_109511337	multiexon	USP30-001	1	ENSG00000135093	ENST00000257548	ENSE00003612552	5	+	ENSG00000135093	ENST00000257548	ENSE00003571752	7	+
chr12_110566755_110570441	multiexon	IFT81-001	1	ENSG00000122970	ENST00000361948	ENSE00001296270	4	+	ENSG00000122970	ENST00000361948	ENSE00001315653	5	+
chr12_110729825_110734542	multiexon	ATP2A2-001	1	ENSG00000174437	ENST00000308664	ENSE00003661162	4	+	ENSG00000174437	ENST00000308664	ENSE00003614270	5	+
chr12_110729825_110760877	multiexon	ATP2A2-001	1	ENSG00000174437	ENST00000308664	ENSE00003661162	4	+	ENSG00000174437	ENST00000308664	ENSE00003603240	6	+
chr12_110778464_110780253	multiexon	ATP2A2-001	1	ENSG00000174437	ENST00000308664	ENSE00003459651	14	+	ENSG00000174437	ENST00000308664	ENSE00003599150	15	+
chr12_110819557_110834257	multiexon	ANAPC7-001	1	ENSG00000196510	ENST00000455511	ENSE00003542305	2	-	ENSG00000196510	ENST00000455511	ENSE00003632856	8	-
chr12_110826317_110834257	multiexon	ANAPC7-001	1	ENSG00000196510	ENST00000455511	ENSE00003542305	2	-	ENSG00000196510	ENST00000455511	ENSE00003577199	4	-
chr12_110826317_110834257	multiexon	RP11-478C19.2-001	1	ENSG00000258210	ENST00000550231	ENSE00003690462	2	-	ENSG00000258210	ENST00000550231	ENSE00003573462	4	-
chr12_110832906_110834257	multiexon	ANAPC7-001	1	ENSG00000196510	ENST00000455511	ENSE00003542305	2	-	ENSG00000196510	ENST00000455511	ENSE00003587039	3	-
chr12_110832906_110834257	multiexon	RP11-478C19.2-001	1	ENSG00000258210	ENST00000550231	ENSE00003690462	2	-	ENSG00000258210	ENST00000550231	ENSE00003604002	3	-
chr12_110832906_110839309	intronic	ANAPC7-001	1
chr12_110922883_110925748	multiexon	FAM216A-001	1	ENSG00000204856	ENST00000377673	ENSE00003459833	3	+	ENSG00000204856	ENST00000377673	ENSE00003571489	6	+
chr12_110974729_110983883	putativeexon	PPTC7-001	1	ENSG00000196850	ENST00000354300	ENSE00000938089	3	-	ENSG00000196850	ENST00000354300	ENSE00001237630	6	-
chr12_110974729_110989773	putativeexon	PPTC7-001	1	ENSG00000196850	ENST00000354300	ENSE00001778958	2	-	ENSG00000196850	ENST00000354300	ENSE00001237630	6	-
chr12_110975949_110989773	multiexon	PPTC7-001	1	ENSG00000196850	ENST00000354300	ENSE00001778958	2	-	ENSG00000196850	ENST00000354300	ENSE00003675538	5	-
chr12_110983685_110989773	multiexon	PPTC7-001	1	ENSG00000196850	ENST00000354300	ENSE00001778958	2	-	ENSG00000196850	ENST00000354300	ENSE00000938089	3	-
chr12_11126254_11199787	multiexon	PRR4-002	2	ENSG00000111215	ENST00000536668	ENSE00003549977	2	-	ENSG00000111215	ENST00000536668	ENSE00003532939	4	-
chr12_11126254_11199787	multiexon	TAS2R14-002	2	ENSG00000212127	ENST00000381852	ENSE00003645998	2	-	ENSG00000212127	ENST00000381852	ENSE00003502412	4	-
chr12_11181000_11199787	intronic	PRR4-002	2
chr12_11181000_11273779	intronic	PRR4-002	2
chr12_111855923_111856681	monoexon	SH2B3-001	1	ENSG00000111252	ENST00000341259	ENSE00001378402	2	+
chr12_11187381_11199787	multiexon	PRR4-002	2	ENSG00000111215	ENST00000536668	ENSE00003549977	2	-	ENSG00000111215	ENST00000536668	ENSE00003553088	3	-
chr12_11187381_11199787	multiexon	TAS2R14-002	2	ENSG00000212127	ENST00000381852	ENSE00003645998	2	-	ENSG00000212127	ENST00000381852	ENSE00003551781	3	-
chr12_11187381_11273779	intronic	PRR4-002	2
chr12_111923069_111924628	multiexon	ATXN2-002	2	ENSG00000204842	ENST00000389153	ENSE00003594823	16	-	ENSG00000204842	ENST00000389153	ENSE00003642411	18	-
chr12_111947353_111948386	multiexon	ATXN2-001	1	ENSG00000204842	ENST00000377617	ENSE00002401831	12	-	ENSG00000204842	ENST00000377617	ENSE00003635668	14	-
chr12_111990084_111993723	multiexon	ATXN2-001	1	ENSG00000204842	ENST00000377617	ENSE00003667178	2	-	ENSG00000204842	ENST00000377617	ENSE00003572230	5	-
chr12_111991962_111993723	multiexon	ATXN2-001	1	ENSG00000204842	ENST00000377617	ENSE00003667178	2	-	ENSG00000204842	ENST00000377617	ENSE00003506188	3	-
chr12_11199619_11273779	putativeexon	PRR4-020	20	ENSG00000111215	ENST00000546265	ENSE00002252243	2	-	ENSG00000111215	ENST00000546265	ENSE00002237478	3	-
chr12_11199619_11281962	intronic	PRR4-002	2
chr12_112086984_112087575	intergenic
chr12_112096540_112097149	multiexon	BRAP-001	1	ENSG00000089234	ENST00000419234	ENSE00003555143	8	-	ENSG00000089234	ENST00000419234	ENSE00003480186	9	-
chr12_112116955_112121111	multiexon	BRAP-001	1	ENSG00000089234	ENST00000419234	ENSE00003677449	2	-	ENSG00000089234	ENST00000419234	ENSE00000755201	4	-
chr12_112303054_112308984	multiexon	MAPKAPK5-001	1	ENSG00000089022	ENST00000550735	ENSE00003551331	2	+	ENSG00000089022	ENST00000550735	ENSE00003327014	7	+
chr12_112370390_112381173	multiexon	TMEM116-001	1	ENSG00000198270	ENST00000552374	ENSE00003498194	5	-	ENSG00000198270	ENST00000552374	ENSE00003494927	10	-
chr12_112371690_112381173	multiexon	TMEM116-001	1	ENSG00000198270	ENST00000552374	ENSE00003498194	5	-	ENSG00000198270	ENST00000552374	ENSE00003632316	9	-
chr12_112371690_112429693	multiexon	TMEM116-001	1	ENSG00000198270	ENST00000552374	ENSE00003694232	4	-	ENSG00000198270	ENST00000552374	ENSE00003632316	9	-
chr12_112498074_112499192	multiexon	NAA25-001	1	ENSG00000111300	ENST00000261745	ENSE00003566875	12	-	ENSG00000111300	ENST00000261745	ENSE00003507695	13	-
chr12_112518864_112530940	multiexon	NAA25-001	1	ENSG00000111300	ENST00000261745	ENSE00003578245	2	-	ENSG00000111300	ENST00000261745	ENSE00003527289	5	-
chr12_112667502_112669519	multiexon	HECTD4-001	1	ENSG00000173064	ENST00000550722	ENSE00001474365	39	-	ENSG00000173064	ENST00000550722	ENSE00003568641	41	-
chr12_112707508_112711599	multiexon	HECTD4-001	1	ENSG00000173064	ENST00000550722	ENSE00001550231	11	-	ENSG00000173064	ENST00000550722	ENSE00003645244	13	-
chr12_11273609_11276922	intronic	PRR4-002	2
chr12_11273609_11281962	intronic	PRR4-002	2
chr12_11273609_11285966	intronic	PRR4-002	2
chr12_112743868_112750951	multiexon	HECTD4-001	1	ENSG00000173064	ENST00000550722	ENSE00003537727	4	-	ENSG00000173064	ENST00000550722	ENSE00003477377	7	-
chr12_112757029_112757546	monoexon	HECTD4-001	1	ENSG00000173064	ENST00000550722	ENSE00003569440	2	-
chr12_112910748_112915819	multiexon	PTPN11-001	1	ENSG00000179295	ENST00000351677	ENSE00000755331	7	+	ENSG00000179295	ENST00000351677	ENSE00000755333	9	+
chr12_112915455_112915819	multiexon	PTPN11-001	1	ENSG00000179295	ENST00000351677	ENSE00000755332	8	+	ENSG00000179295	ENST00000351677	ENSE00000755333	9	+
chr12_113541751_113542103	multiexon	RASAL1-001	1	ENSG00000111344	ENST00000261729	ENSE00003592144	18	-	ENSG00000111344	ENST00000261729	ENSE00003541851	19	-
chr12_1136914_1137738	monoexon	ERC1-001	1	ENSG00000082805	ENST00000543086	ENSE00001318114	2	+
chr12_113758136_113759153	multiexon	SLC8B1-001	1	ENSG00000089060	ENST00000552014	ENSE00003469345	4	-	ENSG00000089060	ENST00000552014	ENSE00003614561	8	-
chr12_116434281_116435035	multiexon	MED13L-001	1	ENSG00000123066	ENST00000281928	ENSE00001092209	15	-	ENSG00000123066	ENST00000281928	ENSE00001003522	16	-
chr12_116534474_116549317	multiexon	MED13L-001	1	ENSG00000123066	ENST00000281928	ENSE00003617003	3	-	ENSG00000123066	ENST00000281928	ENSE00001406609	4	-
chr12_116534474_116675510	multiexon	MED13L-001	1	ENSG00000123066	ENST00000281928	ENSE00003472959	2	-	ENSG00000123066	ENST00000281928	ENSE00001406609	4	-
chr12_116668238_116675510	intronic	MED13L-001	1
chr12_116668338_116675510	intronic	MED13L-001	1
chr12_116674626_116675510	intronic	MED13L-001	1
chr12_116675273_116675510	monoexon	MED13L-001	1	ENSG00000123066	ENST00000281928	ENSE00003472959	2	-
chr12_117271597_117274087	multiexon	RNFT2-001	1	ENSG00000135119	ENST00000257575	ENSE00003596702	8	+	ENSG00000135119	ENST00000257575	ENSE00003674060	10	+
chr12_117365828_117387511	multiexon	FBXW8-001	1	ENSG00000174989	ENST00000455858	ENSE00000835048	2	+	ENSG00000174989	ENST00000455858	ENSE00000835050	4	+
chr12_117365828_117402659	multiexon	FBXW8-001	1	ENSG00000174989	ENST00000455858	ENSE00000835048	2	+	ENSG00000174989	ENST00000455858	ENSE00001258664	5	+
chr12_117383169_117387511	multiexon	FBXW8-001	1	ENSG00000174989	ENST00000455858	ENSE00000835049	3	+	ENSG00000174989	ENST00000455858	ENSE00000835050	4	+
chr12_117383169_117402659	multiexon	FBXW8-001	1	ENSG00000174989	ENST00000455858	ENSE00000835049	3	+	ENSG00000174989	ENST00000455858	ENSE00001258664	5	+
chr12_117402502_117426674	multiexon	FBXW8-001	1	ENSG00000174989	ENST00000455858	ENSE00001258664	5	+	ENSG00000174989	ENST00000455858	ENSE00001258642	7	+
chr12_117423011_117426674	multiexon	FBXW8-001	1	ENSG00000174989	ENST00000455858	ENSE00001258654	6	+	ENSG00000174989	ENST00000455858	ENSE00001258642	7	+
chr12_117467827_117468639	intergenic
chr12_117476788_117484643	putativeexon	TESC-001	1	ENSG00000088992	ENST00000335209	ENSE00003620577	5	-	ENSG00000088992	ENST00000335209	ENSE00001829567	8	-
chr12_118456877_118460164	multiexon	RFC5-001	1	ENSG00000111445	ENST00000392542	ENSE00003510262	3	+	ENSG00000111445	ENST00000392542	ENSE00001254253	6	+
chr12_118456877_118463633	multiexon	RFC5-001	1	ENSG00000111445	ENST00000392542	ENSE00003510262	3	+	ENSG00000111445	ENST00000392542	ENSE00003501648	8	+
chr12_11992074_12006495	multiexon	ETV6-001	1	ENSG00000139083	ENST00000396373	ENSE00001634229	3	+	ENSG00000139083	ENST00000396373	ENSE00001623881	4	+
chr12_120260624_120263172	multiexon	CIT-001	1	ENSG00000122966	ENST00000261833	ENSE00001034409	8	-	ENSG00000122966	ENST00000261833	ENSE00001034410	9	-
chr12_120260624_120272032	multiexon	CIT-001	1	ENSG00000122966	ENST00000261833	ENSE00001034406	6	-	ENSG00000122966	ENST00000261833	ENSE00001034410	9	-
chr12_120260624_120288079	multiexon	CIT-001	1	ENSG00000122966	ENST00000261833	ENSE00001034411	5	-	ENSG00000122966	ENST00000261833	ENSE00001034410	9	-
chr12_120287978_120295502	multiexon	CIT-001	1	ENSG00000122966	ENST00000261833	ENSE00001034408	4	-	ENSG00000122966	ENST00000261833	ENSE00001034411	5	-
chr12_120287978_120313985	multiexon	CIT-001	1	ENSG00000122966	ENST00000261833	ENSE00001131908	2	-	ENSG00000122966	ENST00000261833	ENSE00001034411	5	-
chr12_12037379_12038960	multiexon	ETV6-001	1	ENSG00000139083	ENST00000396373	ENSE00001649298	6	+	ENSG00000139083	ENST00000396373	ENSE00001657880	7	+
chr12_120580311_120580745	multiexon	GCN1L1-001	1	ENSG00000089154	ENST00000300648	ENSE00000564504	43	-	ENSG00000089154	ENST00000300648	ENSE00000756010	44	-
chr12_120588949_120589195	monoexon	GCN1L1-001	1	ENSG00000089154	ENST00000300648	ENSE00000756055	34	-
chr12_120592774_120593523	multiexon	GCN1L1-001	1	ENSG00000089154	ENST00000300648	ENSE00003628292	29	-	ENSG00000089154	ENST00000300648	ENSE00000564478	31	-
chr12_120995085_120995485	multiexon	RNF10-001	1	ENSG00000022840	ENST00000325954	ENSE00003594401	5	+	ENSG00000022840	ENST00000325954	ENSE00001128109	6	+
chr12_121002875_121004783	multiexon	RNF10-001	1	ENSG00000022840	ENST00000325954	ENSE00003485301	11	+	ENSG00000022840	ENST00000325954	ENSE00003506784	13	+
chr12_121154431_121154845	multiexon	UNC119B-001	1	ENSG00000175970	ENST00000344651	ENSE00001369996	3	+	ENSG00000175970	ENST00000344651	ENSE00001383176	4	+
chr12_121220458_121222396	multiexon	SPPL3-001	1	ENSG00000157837	ENST00000353487	ENSE00003498854	4	-	ENSG00000157837	ENST00000353487	ENSE00001126827	6	-
chr12_121220458_121229360	multiexon	SPPL3-001	1	ENSG00000157837	ENST00000353487	ENSE00003535576	3	-	ENSG00000157837	ENST00000353487	ENSE00001126827	6	-
chr12_122181535_122190129	multiexon	TMEM120B-001	1	ENSG00000188735	ENST00000342607	ENSE00001387170	2	+	ENSG00000188735	ENST00000342607	ENSE00001368632	5	+
chr12_122181535_122199644	multiexon	TMEM120B-001	1	ENSG00000188735	ENST00000342607	ENSE00001387170	2	+	ENSG00000188735	ENST00000342607	ENSE00003481022	6	+
chr12_122218778_122219098	multiexon	RHOF-001	1	ENSG00000139725	ENST00000267205	ENSE00003708134	3	-	ENSG00000139725	ENST00000267205	ENSE00003708483	4	-
chr12_122332645_122341013	multiexon	PSMD9-001	1	ENSG00000110801	ENST00000261817	ENSE00003590737	2	+	ENSG00000110801	ENST00000261817	ENSE00003707630	4	+
chr12_122332645_122341013	multiexon	RP11-87C12.2-001	1	ENSG00000256950	ENST00000546333	ENSE00003534257	2	+	ENSG00000256950	ENST00000546333	ENSE00003578911	3	+
chr12_122716677_122717515	putativeexon	VPS33A-001	1	ENSG00000139719	ENST00000267199	ENSE00003557877	12	-	ENSG00000139719	ENST00000267199	ENSE00001122284	13	-
chr12_122720333_122723271	multiexon	RP11-512M8.5-001	1	ENSG00000256861	ENST00000535844	ENSE00003491430	9	-	ENSG00000256861	ENST00000535844	ENSE00003514506	10	-
chr12_122720333_122723271	multiexon	VPS33A-001	1	ENSG00000139719	ENST00000267199	ENSE00003661023	10	-	ENSG00000139719	ENST00000267199	ENSE00003542472	11	-
chr12_122734418_122735646	multiexon	VPS33A-001	1	ENSG00000139719	ENST00000267199	ENSE00003553526	5	-	ENSG00000139719	ENST00000267199	ENSE00003500995	6	-
chr12_122745808_122748746	multiexon	RP11-512M8.5-001	1	ENSG00000256861	ENST00000535844	ENSE00003491081	2	-	ENSG00000256861	ENST00000535844	ENSE00003687977	4	-
chr12_122745808_122748746	multiexon	VPS33A-001	1	ENSG00000139719	ENST00000267199	ENSE00003633533	2	-	ENSG00000139719	ENST00000267199	ENSE00003592714	4	-
chr12_122773036_122801402	multiexon	CLIP1-001	1	ENSG00000130779	ENST00000302528	ENSE00003503944	17	-	ENSG00000130779	ENST00000302528	ENSE00003601072	19	-
chr12_122968007_122983410	putativeexon	ZCCHC8-002	2	ENSG00000033030	ENST00000543897	ENSE00002251766	1	-
chr12_122973933_122977336	multiexon	ZCCHC8-002	2	ENSG00000033030	ENST00000543897	ENSE00003470878	2	-	ENSG00000033030	ENST00000543897	ENSE00003575006	4	-
chr12_12301876_12303972	multiexon	LRP6-001	1	ENSG00000070018	ENST00000261349	ENSE00000721649	13	-	ENSG00000070018	ENST00000261349	ENSE00000721644	14	-
chr12_123030723_123032516	multiexon	KNTC1-001	1	ENSG00000184445	ENST00000333479	ENSE00002230652	9	+	ENSG00000184445	ENST00000333479	ENSE00002309865	12	+
chr12_123030723_123036243	multiexon	KNTC1-001	1	ENSG00000184445	ENST00000333479	ENSE00002230652	9	+	ENSG00000184445	ENST00000333479	ENSE00002307907	16	+
chr12_123041931_123042236	multiexon	KNTC1-001	1	ENSG00000184445	ENST00000333479	ENSE00002209010	17	+	ENSG00000184445	ENST00000333479	ENSE00002292932	18	+
chr12_123068825_123073363	multiexon	KNTC1-001	1	ENSG00000184445	ENST00000333479	ENSE00002263445	35	+	ENSG00000184445	ENST00000333479	ENSE00002296471	40	+
chr12_123102890_123107154	multiexon	KNTC1-001	1	ENSG00000184445	ENST00000333479	ENSE00003635594	58	+	ENSG00000184445	ENST00000333479	ENSE00003551657	62	+
chr12_123262038_123265877	multiexon	CCDC62-001	1	ENSG00000130783	ENST00000253079	ENSE00001334486	2	+	ENSG00000130783	ENST00000253079	ENSE00001334485	3	+
chr12_12332744_12340053	multiexon	LRP6-001	1	ENSG00000070018	ENST00000261349	ENSE00000721689	4	-	ENSG00000070018	ENST00000261349	ENSE00000721676	7	-
chr12_12339857_12356334	multiexon	LRP6-001	1	ENSG00000070018	ENST00000261349	ENSE00003663975	3	-	ENSG00000070018	ENST00000261349	ENSE00000721689	4	-
chr12_123651202_123665757	multiexon	MPHOSPH9-003	3	ENSG00000051825	ENST00000539024	ENSE00003694794	8	-	ENSG00000051825	ENST00000539024	ENSE00003695777	11	-
chr12_123678933_123679148	monoexon	MPHOSPH9-003	3	ENSG00000051825	ENST00000539024	ENSE00003695857	7	-
chr12_123678933_123682881	multiexon	MPHOSPH9-003	3	ENSG00000051825	ENST00000539024	ENSE00003697169	6	-	ENSG00000051825	ENST00000539024	ENSE00003695857	7	-
chr12_123798167_123800207	multiexon	SBNO1-001	1	ENSG00000139697	ENST00000602750	ENSE00002236594	22	-	ENSG00000139697	ENST00000602750	ENSE00002283375	24	-
chr12_123818600_123825635	multiexon	SBNO1-001	1	ENSG00000139697	ENST00000602750	ENSE00001319948	5	-	ENSG00000139697	ENST00000602750	ENSE00001308196	7	-
chr12_12397196_12397589	monoexon	LRP6-001	1	ENSG00000070018	ENST00000261349	ENSE00000822034	2	-
chr12_12397196_12412829	intronic	LRP6-001	1
chr12_123983091_123984083	multiexon	RILPL1-001	1	ENSG00000188026	ENST00000376874	ENSE00001377405	3	-	ENSG00000188026	ENST00000376874	ENSE00001382139	4	-
chr12_124071294_124074996	multiexon	TMED2-001	1	ENSG00000086598	ENST00000262225	ENSE00003559654	2	+	ENSG00000086598	ENST00000262225	ENSE00000551381	3	+
chr12_124102305_124103384	multiexon	DDX55-001	1	ENSG00000111364	ENST00000238146	ENSE00003581770	11	+	ENSG00000111364	ENST00000238146	ENSE00003503965	12	+
chr12_124123811_124137282	multiexon	GTF2H3-001	1	ENSG00000111358	ENST00000543341	ENSE00003577706	2	+	ENSG00000111358	ENST00000543341	ENSE00003501644	7	+
chr12_124130002_124137282	multiexon	GTF2H3-001	1	ENSG00000111358	ENST00000543341	ENSE00003497879	3	+	ENSG00000111358	ENST00000543341	ENSE00003501644	7	+
chr12_124172598_124177270	multiexon	TCTN2-001	1	ENSG00000168778	ENST00000303372	ENSE00001316304	7	+	ENSG00000168778	ENST00000303372	ENSE00001320402	9	+
chr12_124882665_124934413	multiexon	NCOR2-001	1	ENSG00000196498	ENST00000429285	ENSE00003608716	8	-	ENSG00000196498	ENST00000429285	ENSE00002257694	17	-
chr12_124904503_124915333	multiexon	NCOR2-001	1	ENSG00000196498	ENST00000429285	ENSE00003531452	10	-	ENSG00000196498	ENST00000429285	ENSE00002288378	14	-
chr12_124904503_124934413	multiexon	NCOR2-001	1	ENSG00000196498	ENST00000429285	ENSE00003608716	8	-	ENSG00000196498	ENST00000429285	ENSE00002288378	14	-
chr12_124950719_124971114	multiexon	NCOR2-001	1	ENSG00000196498	ENST00000429285	ENSE00003671407	3	-	ENSG00000196498	ENST00000429285	ENSE00003546707	6	-
chr12_125436944_125438757	multiexon	DHX37-001	1	ENSG00000150990	ENST00000539298	ENSE00003500930	19	-	ENSG00000150990	ENST00000539298	ENSE00003544347	21	-
chr12_125587225_125591814	multiexon	AACS-001	1	ENSG00000081760	ENST00000316519	ENSE00003607181	6	+	ENSG00000081760	ENST00000316519	ENSE00003535117	8	+
chr12_12672796_12674397	multiexon	DUSP16-001	1	ENSG00000111266	ENST00000228862	ENSE00001370962	2	-	ENSG00000111266	ENST00000228862	ENSE00000721801	3	-
chr12_12788711_12788908	monoexon	CREBL2-001	1	ENSG00000111269	ENST00000228865	ENSE00003604746	2	+
chr12_129293333_129299615	multiexon	SLC15A4-001	1	ENSG00000139370	ENST00000266771	ENSE00003564986	2	-	ENSG00000139370	ENST00000266771	ENSE00003462507	5	-
chr12_129299320_129299615	monoexon	SLC15A4-001	1	ENSG00000139370	ENST00000266771	ENSE00003564986	2	-
chr12_12992008_12999533	intergenic
chr12_13061177_13062105	monoexon	GPRC5A-001	1	ENSG00000013588	ENST00000014914	ENSE00000822076	2	+
chr12_133083838_133084936	multiexon	FBRSL1-002	2	ENSG00000112787	ENST00000542061	ENSE00002294101	2	+	ENSG00000112787	ENST00000542061	ENSE00002305073	3	+
chr12_133084739_133104574	multiexon	FBRSL1-001	1	ENSG00000112787	ENST00000434748	ENSE00001781255	2	+	ENSG00000112787	ENST00000434748	ENSE00001788931	4	+
chr12_133084739_133124618	multiexon	FBRSL1-001	1	ENSG00000112787	ENST00000434748	ENSE00001781255	2	+	ENSG00000112787	ENST00000434748	ENSE00001683027	5	+
chr12_133245397_133248908	multiexon	POLE-001	1	ENSG00000177084	ENST00000320574	ENSE00003691443	16	-	ENSG00000177084	ENST00000320574	ENSE00003652503	17	-
chr12_133291444_133294706	multiexon	PGAM5-001	1	ENSG00000247077	ENST00000317555	ENSE00003665278	2	+	ENSG00000247077	ENST00000317555	ENSE00001218078	5	+
chr12_133291444_133294706	multiexon	PXMP2-201	201	ENSG00000176894	ENST00000545677	ENSE00003509901	5	+	ENSG00000176894	ENST00000545677	ENSE00003343472	8	+
chr12_133310971_133312098	multiexon	ANKLE2-001	1	ENSG00000176915	ENST00000357997	ENSE00003623169	9	-	ENSG00000176915	ENST00000357997	ENSE00003620785	10	-
chr12_133331261_133331719	monoexon	ANKLE2-001	1	ENSG00000176915	ENST00000357997	ENSE00001645663	2	-
chr12_133357384_133359079	multiexon	GOLGA3-001	1	ENSG00000090615	ENST00000450791	ENSE00000757616	16	-	ENSG00000090615	ENST00000450791	ENSE00000757617	17	-
chr12_133393126_133398897	putativeexon	GOLGA3-001	1	ENSG00000090615	ENST00000450791	ENSE00002269935	1	-	ENSG00000090615	ENST00000450791	ENSE00000757602	2	-
chr12_133428204_133430159	multiexon	CHFR-001	1	ENSG00000072609	ENST00000315585	ENSE00003673123	11	-	ENSG00000072609	ENST00000315585	ENSE00003515405	12	-
chr12_133624541_133625434	multiexon	ZNF84-001	1	ENSG00000198040	ENST00000327668	ENSE00003572129	3	+	ENSG00000198040	ENST00000327668	ENSE00003591720	4	+
chr12_133768075_133768589	multiexon	CTD-2140B24.4-001	1	ENSG00000256825	ENST00000540096	ENSE00003680266	8	+	ENSG00000256825	ENST00000540096	ENSE00003560485	9	+
chr12_133768075_133768589	multiexon	ZNF268-001	1	ENSG00000090612	ENST00000536435	ENSE00003595282	4	+	ENSG00000090612	ENST00000536435	ENSE00003495048	5	+
chr12_13906251_13906849	monoexon	GRIN2B-001	1	ENSG00000273079	ENST00000609686	ENSE00000993731	3	-
chr12_14018732_14019160	monoexon	GRIN2B-001	1	ENSG00000273079	ENST00000609686	ENSE00000993733	2	-
chr12_15834160_15866259	intronic	EPS8-001	1
chr12_1887020_1893239	multiexon	ADIPOR2-001	1	ENSG00000006831	ENST00000357103	ENSE00003512544	4	+	ENSG00000006831	ENST00000357103	ENSE00000712257	7	+
chr12_19406874_19410471	multiexon	PLEKHA5-001	1	ENSG00000052126	ENST00000538714	ENSE00003604713	4	+	ENSG00000052126	ENST00000538714	ENSE00003514800	6	+
chr12_19406874_19413955	multiexon	PLEKHA5-001	1	ENSG00000052126	ENST00000538714	ENSE00003604713	4	+	ENSG00000052126	ENST00000538714	ENSE00003664717	7	+
chr12_19406874_19418784	multiexon	PLEKHA5-001	1	ENSG00000052126	ENST00000538714	ENSE00003604713	4	+	ENSG00000052126	ENST00000538714	ENSE00003469043	8	+
chr12_19496257_19501453	multiexon	PLEKHA5-001	1	ENSG00000052126	ENST00000538714	ENSE00001276778	19	+	ENSG00000052126	ENST00000538714	ENSE00001276766	21	+
chr12_19498776_19501453	multiexon	PLEKHA5-001	1	ENSG00000052126	ENST00000538714	ENSE00001276772	20	+	ENSG00000052126	ENST00000538714	ENSE00001276766	21	+
chr12_19498776_19506936	multiexon	PLEKHA5-001	1	ENSG00000052126	ENST00000538714	ENSE00001276772	20	+	ENSG00000052126	ENST00000538714	ENSE00001209133	22	+
chr12_19615444_19619784	intronic	AEBP2-002	2
chr12_19615444_19626289	multiexon	AEBP2-002	2	ENSG00000139154	ENST00000398864	ENSE00003642446	2	+	ENSG00000139154	ENST00000398864	ENSE00001711103	3	+
chr12_19615444_19636987	intronic	AEBP2-002	2
chr12_19615444_19646920	multiexon	AEBP2-002	2	ENSG00000139154	ENST00000398864	ENSE00003642446	2	+	ENSG00000139154	ENST00000398864	ENSE00001682922	4	+
chr12_19615444_19653155	multiexon	AEBP2-002	2	ENSG00000139154	ENST00000398864	ENSE00003642446	2	+	ENSG00000139154	ENST00000398864	ENSE00001685772	5	+
chr12_19626182_19646920	multiexon	AEBP2-002	2	ENSG00000139154	ENST00000398864	ENSE00001711103	3	+	ENSG00000139154	ENST00000398864	ENSE00001682922	4	+
chr12_19626182_19653155	multiexon	AEBP2-002	2	ENSG00000139154	ENST00000398864	ENSE00001711103	3	+	ENSG00000139154	ENST00000398864	ENSE00001685772	5	+
chr12_19646734_19646920	monoexon	AEBP2-002	2	ENSG00000139154	ENST00000398864	ENSE00001682922	4	+
chr12_19646734_19653155	multiexon	AEBP2-002	2	ENSG00000139154	ENST00000398864	ENSE00001682922	4	+	ENSG00000139154	ENST00000398864	ENSE00001685772	5	+
chr12_19705787_19706326	intronic	AEBP2-007	7
chr12_20076132_20127661	intronic	RP11-405A12.2-001	1
chr12_20766377_20774345	multiexon	PDE3A-001	1	ENSG00000172572	ENST00000359062	ENSE00003510563	3	+	ENSG00000172572	ENST00000359062	ENSE00003659331	5	+
chr12_20769164_20787990	multiexon	PDE3A-001	1	ENSG00000172572	ENST00000359062	ENSE00003519456	4	+	ENSG00000172572	ENST00000359062	ENSE00003542591	8	+
chr12_20774230_20792891	multiexon	PDE3A-001	1	ENSG00000172572	ENST00000359062	ENSE00003659331	5	+	ENSG00000172572	ENST00000359062	ENSE00003499330	10	+
chr12_20790034_20803534	multiexon	PDE3A-001	1	ENSG00000172572	ENST00000359062	ENSE00003577466	9	+	ENSG00000172572	ENST00000359062	ENSE00003518916	14	+
chr12_20790034_20807139	multiexon	PDE3A-001	1	ENSG00000172572	ENST00000359062	ENSE00003577466	9	+	ENSG00000172572	ENST00000359062	ENSE00003549099	15	+
chr12_21028169_21054401	multiexon	LST3-002	2	ENSG00000257046	ENST00000540229	ENSE00003474698	7	+	ENSG00000257046	ENST00000540229	ENSE00003564680	13	+
chr12_21028169_21054401	multiexon	SLCO1B3-001	1	ENSG00000111700	ENST00000381545	ENSE00003508411	9	+	ENSG00000111700	ENST00000381545	ENSE00003632432	15	+
chr12_22631247_22637822	multiexon	C2CD5-001	1	ENSG00000111731	ENST00000333957	ENSE00003561085	13	-	ENSG00000111731	ENST00000333957	ENSE00000729458	15	-
chr12_22637631_22643152	multiexon	C2CD5-001	1	ENSG00000111731	ENST00000333957	ENSE00003586633	12	-	ENSG00000111731	ENST00000333957	ENSE00003561085	13	-
chr12_22643057_22659753	multiexon	C2CD5-001	1	ENSG00000111731	ENST00000333957	ENSE00003529603	10	-	ENSG00000111731	ENST00000333957	ENSE00003586633	12	-
chr12_22646157_22659753	multiexon	C2CD5-001	1	ENSG00000111731	ENST00000333957	ENSE00003529603	10	-	ENSG00000111731	ENST00000333957	ENSE00003635237	11	-
chr12_22796697_22796956	monoexon	ETNK1-001	1	ENSG00000139163	ENST00000266517	ENSE00001177082	2	+
chr12_22796697_22826594	multiexon	ETNK1-001	1	ENSG00000139163	ENST00000266517	ENSE00001177082	2	+	ENSG00000139163	ENST00000266517	ENSE00003547802	6	+
chr12_22811948_22826594	multiexon	ETNK1-001	1	ENSG00000139163	ENST00000266517	ENSE00003483329	3	+	ENSG00000139163	ENST00000266517	ENSE00003547802	6	+
chr12_27075549_27081838	multiexon	ASUN-001	1	ENSG00000064102	ENST00000261191	ENSE00003527724	4	-	ENSG00000064102	ENST00000261191	ENSE00001646446	8	-
chr12_27077288_27081838	multiexon	ASUN-001	1	ENSG00000064102	ENST00000261191	ENSE00003527724	4	-	ENSG00000064102	ENST00000261191	ENSE00001683532	7	-
chr12_27132717_27143560	multiexon	TM7SF3-001	1	ENSG00000064115	ENST00000343028	ENSE00000835917	6	-	ENSG00000064115	ENST00000343028	ENSE00000732913	9	-
chr12_27143383_27152609	multiexon	TM7SF3-001	1	ENSG00000064115	ENST00000343028	ENSE00003544261	3	-	ENSG00000064115	ENST00000343028	ENSE00000835917	6	-
chr12_27143383_27156323	multiexon	TM7SF3-001	1	ENSG00000064115	ENST00000343028	ENSE00003546896	2	-	ENSG00000064115	ENST00000343028	ENSE00000835917	6	-
chr12_27148170_27156323	multiexon	TM7SF3-001	1	ENSG00000064115	ENST00000343028	ENSE00003546896	2	-	ENSG00000064115	ENST00000343028	ENSE00003513515	5	-
chr12_27149675_27152609	multiexon	TM7SF3-001	1	ENSG00000064115	ENST00000343028	ENSE00003544261	3	-	ENSG00000064115	ENST00000343028	ENSE00003473954	4	-
chr12_27183091_27185614	intronic	MED21-003	3
chr12_27183667_27185614	intronic	MED21-003	3
chr12_27199087_27219830	intergenic	MED21-003	3
chr12_27199091_27219159	putativeexon	MED21-003	3	ENSG00000152944	ENST00000538186	ENSE00002249576	3	+
chr12_27199091_27219830	intergenic	MED21-003	3
chr12_27521195_27523163	multiexon	ARNTL2-001	1	ENSG00000029153	ENST00000266503	ENSE00001600104	2	+	ENSG00000029153	ENST00000266503	ENSE00003693240	3	+
chr12_27521195_27529349	intronic	ARNTL2-001	1
chr12_27521195_27533337	multiexon	ARNTL2-001	1	ENSG00000029153	ENST00000266503	ENSE00001600104	2	+	ENSG00000029153	ENST00000266503	ENSE00001007997	5	+
chr12_27533180_27543172	multiexon	ARNTL2-001	1	ENSG00000029153	ENST00000266503	ENSE00001007997	5	+	ENSG00000029153	ENST00000266503	ENSE00000936658	9	+
chr12_27731085_27788048	multiexon	PPFIBP1-001	1	ENSG00000110841	ENST00000228425	ENSE00001188879	2	+	ENSG00000110841	ENST00000228425	ENSE00001238579	4	+
chr12_27786295_27788048	multiexon	PPFIBP1-001	1	ENSG00000110841	ENST00000228425	ENSE00003554147	3	+	ENSG00000110841	ENST00000228425	ENSE00001238579	4	+
chr12_27824364_27827154	multiexon	PPFIBP1-001	1	ENSG00000110841	ENST00000228425	ENSE00000733651	14	+	ENSG00000110841	ENST00000228425	ENSE00001008006	17	+
chr12_27867713_27877119	multiexon	MRPS35-001	1	ENSG00000061794	ENST00000081029	ENSE00001008073	2	+	ENSG00000061794	ENST00000081029	ENSE00003591582	5	+
chr12_27867713_27878600	multiexon	MRPS35-005	5	ENSG00000061794	ENST00000542199	ENSE00001008073	2	+	ENSG00000061794	ENST00000542199	ENSE00002238900	6	+
chr12_27867713_27890541	multiexon	MRPS35-001	1	ENSG00000061794	ENST00000081029	ENSE00001008073	2	+	ENSG00000061794	ENST00000081029	ENSE00003641578	7	+
chr12_27872741_27877119	multiexon	MRPS35-001	1	ENSG00000061794	ENST00000081029	ENSE00003469386	4	+	ENSG00000061794	ENST00000081029	ENSE00003591582	5	+
chr12_28378232_28379132	intronic	CCDC91-001	1
chr12_28378728_28412375	multiexon	CCDC91-001	1	ENSG00000123106	ENST00000545336	ENSE00002275047	2	+	ENSG00000123106	ENST00000545336	ENSE00001297407	6	+
chr12_28378728_28460682	multiexon	CCDC91-001	1	ENSG00000123106	ENST00000545336	ENSE00002275047	2	+	ENSG00000123106	ENST00000545336	ENSE00003546464	9	+
chr12_28408514_28412375	multiexon	CCDC91-001	1	ENSG00000123106	ENST00000545336	ENSE00002248233	4	+	ENSG00000123106	ENST00000545336	ENSE00001297407	6	+
chr12_28408514_28460682	multiexon	CCDC91-001	1	ENSG00000123106	ENST00000545336	ENSE00002248233	4	+	ENSG00000123106	ENST00000545336	ENSE00003546464	9	+
chr12_28408514_28544344	multiexon	CCDC91-001	1	ENSG00000123106	ENST00000545336	ENSE00002248233	4	+	ENSG00000123106	ENST00000545336	ENSE00003526409	11	+
chr12_28457559_28544344	multiexon	CCDC91-006	6	ENSG00000123106	ENST00000540401	ENSE00003537807	2	+	ENSG00000123106	ENST00000540401	ENSE00003571187	7	+
chr12_28458582_28460682	multiexon	CCDC91-001	1	ENSG00000123106	ENST00000545336	ENSE00003625549	7	+	ENSG00000123106	ENST00000545336	ENSE00003546464	9	+
chr12_28458582_28544344	multiexon	CCDC91-001	1	ENSG00000123106	ENST00000545336	ENSE00003625549	7	+	ENSG00000123106	ENST00000545336	ENSE00003526409	11	+
chr12_28515371_28544344	multiexon	CCDC91-001	1	ENSG00000123106	ENST00000545336	ENSE00003663328	10	+	ENSG00000123106	ENST00000545336	ENSE00003526409	11	+
chr12_2929252_2930958	multiexon	ITFG2-001	1	ENSG00000111203	ENST00000228799	ENSE00003507139	5	+	ENSG00000111203	ENST00000228799	ENSE00003635081	9	+
chr12_2931960_2933418	putativeexon	ITFG2-001	1	ENSG00000111203	ENST00000228799	ENSE00003518718	10	+	ENSG00000111203	ENST00000228799	ENSE00001882716	12	+
chr12_29786080_29813818	multiexon	TMTC1-003	3	ENSG00000133687	ENST00000553189	ENSE00003638142	6	-	ENSG00000133687	ENST00000553189	ENSE00003619492	8	-
chr12_29812813_29813818	multiexon	TMTC1-003	3	ENSG00000133687	ENST00000553189	ENSE00003638142	6	-	ENSG00000133687	ENST00000553189	ENSE00003559273	7	-
chr12_29812813_29814312	intronic	TMTC1-001	1
chr12_29904599_29911710	multiexon	TMTC1-001	1	ENSG00000133687	ENST00000256062	ENSE00003659992	3	-	ENSG00000133687	ENST00000256062	ENSE00003502743	5	-
chr12_29904599_29921008	multiexon	TMTC1-001	1	ENSG00000133687	ENST00000256062	ENSE00003646738	2	-	ENSG00000133687	ENST00000256062	ENSE00003502743	5	-
chr12_3018695_3031568	multiexon	TULP3-001	1	ENSG00000078246	ENST00000448120	ENSE00003684072	2	+	ENSG00000078246	ENST00000448120	ENSE00003551544	4	+
chr12_30818154_30819185	multiexon	IPO8-001	1	ENSG00000133704	ENST00000256079	ENSE00000734530	11	-	ENSG00000133704	ENST00000256079	ENSE00000734526	13	-
chr12_3103904_3104158	monoexon	TEAD4-001	1	ENSG00000197905	ENST00000359864	ENSE00002224630	3	+
chr12_31595709_31600703	multiexon	DENND5B-001	1	ENSG00000170456	ENST00000389082	ENSE00001340152	6	-	ENSG00000170456	ENST00000389082	ENSE00001186195	7	-
chr12_31648744_31652605	multiexon	DENND5B-002	2	ENSG00000170456	ENST00000354285	ENSE00001431206	2	-	ENSG00000170456	ENST00000354285	ENSE00003558715	3	-
chr12_32458631_32459056	monoexon	BICD1-001	1	ENSG00000151746	ENST00000548411	ENSE00001001518	4	+
chr12_32751431_32754357	multiexon	FGD4-001	1	ENSG00000139132	ENST00000427716	ENSE00003628523	5	+	ENSG00000139132	ENST00000427716	ENSE00003583095	6	+
chr12_32751431_32764217	multiexon	FGD4-001	1	ENSG00000139132	ENST00000427716	ENSE00003628523	5	+	ENSG00000139132	ENST00000427716	ENSE00003539180	10	+
chr12_32760891_32764217	multiexon	FGD4-001	1	ENSG00000139132	ENST00000427716	ENSE00003637197	8	+	ENSG00000139132	ENST00000427716	ENSE00003539180	10	+
chr12_32861087_32866305	multiexon	DNM1L-001	1	ENSG00000087470	ENST00000452533	ENSE00003693523	4	+	ENSG00000087470	ENST00000452533	ENSE00003635339	6	+
chr12_32861087_32871697	multiexon	DNM1L-001	1	ENSG00000087470	ENST00000452533	ENSE00003693523	4	+	ENSG00000087470	ENST00000452533	ENSE00003486684	7	+
chr12_32866143_32875567	multiexon	DNM1L-001	1	ENSG00000087470	ENST00000452533	ENSE00003635339	6	+	ENSG00000087470	ENST00000452533	ENSE00003558641	9	+
chr12_32871577_32875567	multiexon	DNM1L-001	1	ENSG00000087470	ENST00000452533	ENSE00003486684	7	+	ENSG00000087470	ENST00000452533	ENSE00003558641	9	+
chr12_39154649_39170103	multiexon	CPNE8-001	1	ENSG00000139117	ENST00000331366	ENSE00003619166	7	-	ENSG00000139117	ENST00000331366	ENSE00003610232	10	-
chr12_39223181_39242464	multiexon	CPNE8-001	1	ENSG00000139117	ENST00000331366	ENSE00003566435	4	-	ENSG00000139117	ENST00000331366	ENSE00003594426	6	-
chr12_39223181_39268313	multiexon	CPNE8-001	1	ENSG00000139117	ENST00000331366	ENSE00003587218	2	-	ENSG00000139117	ENST00000331366	ENSE00003594426	6	-
chr12_42604157_42604482	multiexon	YAF2-005	5	ENSG00000015153	ENST00000547254	ENSE00003494852	3	-	ENSG00000015153	ENST00000547254	ENSE00003530163	4	-
chr12_42748963_42792796	multiexon	PPHLN1-001	1	ENSG00000134283	ENST00000549190	ENSE00003648020	4	+	ENSG00000134283	ENST00000549190	ENSE00001217930	9	+
chr12_42768665_42792796	multiexon	PPHLN1-001	1	ENSG00000134283	ENST00000549190	ENSE00003517976	5	+	ENSG00000134283	ENST00000549190	ENSE00001217930	9	+
chr12_44124409_44125561	putativeexon	PUS7L-001	1	ENSG00000129317	ENST00000344862	ENSE00000887935	8	-	ENSG00000129317	ENST00000344862	ENSE00002418280	9	-
chr12_44537328_44605170	multiexon	TMEM117-001	1	ENSG00000139173	ENST00000266534	ENSE00003557691	4	+	ENSG00000139173	ENST00000266534	ENSE00003577361	5	+
chr12_45097509_45108524	multiexon	NELL2-001	1	ENSG00000184613	ENST00000437801	ENSE00003605353	11	-	ENSG00000184613	ENST00000437801	ENSE00003470401	13	-
chr12_45771836_45784281	multiexon	ANO6-001	1	ENSG00000177119	ENST00000320560	ENSE00003519552	10	+	ENSG00000177119	ENST00000320560	ENSE00003549425	12	+
chr12_46205201_46215270	multiexon	ARID2-001	1	ENSG00000189079	ENST00000334344	ENSE00003486216	4	+	ENSG00000189079	ENST00000334344	ENSE00001420131	6	+
chr12_46230372_46233279	multiexon	ARID2-001	1	ENSG00000189079	ENST00000334344	ENSE00001426558	7	+	ENSG00000189079	ENST00000334344	ENSE00003518023	11	+
chr12_4626227_4628046	multiexon	C12orf4-001	1	ENSG00000047621	ENST00000261250	ENSE00000714024	7	-	ENSG00000047621	ENST00000261250	ENSE00000713973	9	-
chr12_46285563_46287504	multiexon	ARID2-001	1	ENSG00000189079	ENST00000334344	ENSE00003672262	17	+	ENSG00000189079	ENST00000334344	ENSE00003468581	20	+
chr12_46339032_46345510	multiexon	SCAF11-001	1	ENSG00000139218	ENST00000369367	ENSE00001648848	4	-	ENSG00000139218	ENST00000369367	ENSE00001700360	6	-
chr12_46591503_46592526	multiexon	SLC38A1-001	1	ENSG00000111371	ENST00000552197	ENSE00001223014	14	-	ENSG00000111371	ENST00000552197	ENSE00001534097	16	-
chr12_46622936_46633676	multiexon	SLC38A1-001	1	ENSG00000111371	ENST00000552197	ENSE00000914027	3	-	ENSG00000111371	ENST00000552197	ENSE00003603917	5	-
chr12_46622936_46637097	multiexon	SLC38A1-001	1	ENSG00000111371	ENST00000552197	ENSE00001534247	2	-	ENSG00000111371	ENST00000552197	ENSE00003603917	5	-
chr12_46622936_46648719	multiexon	SLC38A1-003	3	ENSG00000111371	ENST00000439706	ENSE00001603798	2	-	ENSG00000111371	ENST00000439706	ENSE00003603917	6	-
chr12_46633462_46637097	multiexon	SLC38A1-001	1	ENSG00000111371	ENST00000552197	ENSE00001534247	2	-	ENSG00000111371	ENST00000552197	ENSE00000914027	3	-
chr12_46633462_46648719	multiexon	SLC38A1-003	3	ENSG00000111371	ENST00000439706	ENSE00001603798	2	-	ENSG00000111371	ENST00000439706	ENSE00000914027	4	-
chr12_47497896_47501947	intronic	PCED1B-001	1
chr12_48134425_48137459	multiexon	RAPGEF3-001	1	ENSG00000079337	ENST00000449771	ENSE00003496470	18	-	ENSG00000079337	ENST00000449771	ENSE00003491586	21	-
chr12_48477374_48491907	multiexon	SENP1-001	1	ENSG00000079387	ENST00000552189	ENSE00003650436	3	-	ENSG00000079387	ENST00000552189	ENSE00003619056	7	-
chr12_48482584_48491907	multiexon	SENP1-001	1	ENSG00000079387	ENST00000552189	ENSE00003650436	3	-	ENSG00000079387	ENST00000552189	ENSE00003585998	6	-
chr12_48490126_48495299	multiexon	SENP1-001	1	ENSG00000079387	ENST00000552189	ENSE00003675509	2	-	ENSG00000079387	ENST00000552189	ENSE00003550430	4	-
chr12_49053688_49054402	intronic	KANSL2-001	1
chr12_49227060_49228280	multiexon	DDX23-001	1	ENSG00000174243	ENST00000308025	ENSE00003609364	12	-	ENSG00000174243	ENST00000308025	ENSE00003462559	13	-
chr12_49317565_49319461	putativeexon	FKBP11-001	1	ENSG00000134285	ENST00000550765	ENSE00002348971	1	-	ENSG00000134285	ENST00000550765	ENSE00003483899	5	-
chr12_49333438_49334971	multiexon	ARF3-001	1	ENSG00000134287	ENST00000256682	ENSE00003704073	2	-	ENSG00000134287	ENST00000256682	ENSE00003705523	4	-
chr12_49333438_49334971	multiexon	RP11-302B13.5-001	1	ENSG00000272822	ENST00000398092	ENSE00003703388	2	-	ENSG00000272822	ENST00000398092	ENSE00003710154	4	-
chr12_49765011_49884514	multiexon	SPATS2-003	3	ENSG00000123352	ENST00000549412	ENSE00001548408	2	+	ENSG00000123352	ENST00000549412	ENSE00003509334	6	+
chr12_49854553_49854820	monoexon	SPATS2-001	1	ENSG00000123352	ENST00000321898	ENSE00003487580	2	+
chr12_49854553_49884514	multiexon	SPATS2-001	1	ENSG00000123352	ENST00000321898	ENSE00003487580	2	+	ENSG00000123352	ENST00000321898	ENSE00003509334	5	+
chr12_49880033_49884514	multiexon	SPATS2-013	13	ENSG00000123352	ENST00000549045	ENSE00002344256	3	+	ENSG00000123352	ENST00000549045	ENSE00003630820	5	+
chr12_49890616_49893988	multiexon	SPATS2-001	1	ENSG00000123352	ENST00000321898	ENSE00003568079	7	+	ENSG00000123352	ENST00000321898	ENSE00003607495	8	+
chr12_50055749_50062337	multiexon	FMNL3-001	1	ENSG00000161791	ENST00000352151	ENSE00003540569	2	-	ENSG00000161791	ENST00000352151	ENSE00001331883	5	-
chr12_50384467_50386438	multiexon	RACGAP1-001	1	ENSG00000161800	ENST00000312377	ENSE00001162806	13	-	ENSG00000161800	ENST00000312377	ENSE00001162785	16	-
chr12_50385781_50386438	multiexon	RACGAP1-001	1	ENSG00000161800	ENST00000312377	ENSE00001162806	13	-	ENSG00000161800	ENST00000312377	ENSE00001162793	15	-
chr12_50488220_50490755	multiexon	SMARCD1-001	1	ENSG00000066117	ENST00000394963	ENSE00001114645	10	+	ENSG00000066117	ENST00000394963	ENSE00001803107	11	+
chr12_50821545_50822873	multiexon	LARP4-001	1	ENSG00000161813	ENST00000347328	ENSE00003643095	2	+	ENSG00000161813	ENST00000347328	ENSE00003544435	3	+
chr12_50821545_50824353	multiexon	LARP4-001	1	ENSG00000161813	ENST00000347328	ENSE00003643095	2	+	ENSG00000161813	ENST00000347328	ENSE00001655473	4	+
chr12_50821545_50829407	multiexon	LARP4-001	1	ENSG00000161813	ENST00000347328	ENSE00003643095	2	+	ENSG00000161813	ENST00000347328	ENSE00001778960	5	+
chr12_50821545_50835426	multiexon	LARP4-001	1	ENSG00000161813	ENST00000347328	ENSE00003643095	2	+	ENSG00000161813	ENST00000347328	ENSE00003626284	8	+
chr12_50821548_50824353	putativeexon	LARP4-001	1	ENSG00000161813	ENST00000347328	ENSE00003643095	2	+	ENSG00000161813	ENST00000347328	ENSE00001655473	4	+
chr12_50824278_50829407	multiexon	LARP4-001	1	ENSG00000161813	ENST00000347328	ENSE00001655473	4	+	ENSG00000161813	ENST00000347328	ENSE00001778960	5	+
chr12_50824278_50831621	multiexon	LARP4-001	1	ENSG00000161813	ENST00000347328	ENSE00001655473	4	+	ENSG00000161813	ENST00000347328	ENSE00001722264	6	+
chr12_50824278_50835426	multiexon	LARP4-001	1	ENSG00000161813	ENST00000347328	ENSE00001655473	4	+	ENSG00000161813	ENST00000347328	ENSE00003626284	8	+
chr12_50829271_50835426	multiexon	LARP4-001	1	ENSG00000161813	ENST00000347328	ENSE00001778960	5	+	ENSG00000161813	ENST00000347328	ENSE00003626284	8	+
chr12_50829271_50848200	multiexon	LARP4-001	1	ENSG00000161813	ENST00000347328	ENSE00001778960	5	+	ENSG00000161813	ENST00000347328	ENSE00001707001	9	+
chr12_50847243_50848200	multiexon	LARP4-002	2	ENSG00000161813	ENST00000398473	ENSE00003573747	9	+	ENSG00000161813	ENST00000398473	ENSE00001707001	10	+
chr12_50848097_50855130	multiexon	LARP4-001	1	ENSG00000161813	ENST00000347328	ENSE00001707001	9	+	ENSG00000161813	ENST00000347328	ENSE00001631570	10	+
chr12_51173923_51189792	multiexon	ATF1-001	1	ENSG00000123268	ENST00000262053	ENSE00003503033	2	+	ENSG00000123268	ENST00000262053	ENSE00003683463	3	+
chr12_51173923_51203372	multiexon	ATF1-001	1	ENSG00000123268	ENST00000262053	ENSE00003503033	2	+	ENSG00000123268	ENST00000262053	ENSE00000837655	4	+
chr12_51173923_51208222	multiexon	ATF1-001	1	ENSG00000123268	ENST00000262053	ENSE00003503033	2	+	ENSG00000123268	ENST00000262053	ENSE00003675908	6	+
chr12_51402259_51404549	multiexon	SLC11A2-001	1	ENSG00000110911	ENST00000547688	ENSE00003571316	3	-	ENSG00000110911	ENST00000547688	ENSE00003553887	4	-
chr12_51442817_51450285	multiexon	LETMD1-001	1	ENSG00000050426	ENST00000262055	ENSE00003500251	2	+	ENSG00000050426	ENST00000262055	ENSE00003611934	7	+
chr12_51467606_51467865	monoexon	CSRNP2-001	1	ENSG00000110925	ENST00000228515	ENSE00003618134	3	-
chr12_514677_527802	multiexon	CCDC77-001	1	ENSG00000120647	ENST00000239830	ENSE00001351131	2	+	ENSG00000120647	ENST00000239830	ENSE00003484663	5	+
chr12_518534_527802	multiexon	CCDC77-001	1	ENSG00000120647	ENST00000239830	ENSE00003485827	3	+	ENSG00000120647	ENST00000239830	ENSE00003484663	5	+
chr12_52056548_52056877	monoexon	SCN8A-001	1	ENSG00000196876	ENST00000354534	ENSE00001789156	2	+
chr12_52139687_52145377	multiexon	SCN8A-001	1	ENSG00000196876	ENST00000354534	ENSE00001275393	13	+	ENSG00000196876	ENST00000354534	ENSE00001192917	14	+
chr12_5269473_5281055	intergenic
chr12_53421566_53421972	multiexon	EIF4B-001	1	ENSG00000063046	ENST00000262056	ENSE00003574289	7	+	ENSG00000063046	ENST00000262056	ENSE00003653367	8	+
chr12_53670404_53671011	multiexon	ESPL1-001	1	ENSG00000135476	ENST00000552671	ENSE00003560075	8	+	ENSG00000135476	ENST00000552671	ENSE00003501419	9	+
chr12_53670404_53671744	multiexon	ESPL1-001	1	ENSG00000135476	ENST00000552671	ENSE00003560075	8	+	ENSG00000135476	ENST00000552671	ENSE00003636979	11	+
chr12_56493432_56494029	multiexon	ERBB3-001	1	ENSG00000065361	ENST00000267101	ENSE00003571409	24	+	ENSG00000065361	ENST00000267101	ENSE00003689485	26	+
chr12_56527201_56528212	multiexon	ESYT1-001	1	ENSG00000139641	ENST00000394048	ENSE00000939451	11	+	ENSG00000139641	ENST00000394048	ENSE00000939455	15	+
chr12_56669780_56676775	multiexon	CS-001	1	ENSG00000062485	ENST00000351328	ENSE00003656673	5	-	ENSG00000062485	ENST00000351328	ENSE00003480306	7	-
chr12_56676204_56676775	multiexon	CS-001	1	ENSG00000062485	ENST00000351328	ENSE00003656673	5	-	ENSG00000062485	ENST00000351328	ENSE00003513078	6	-
chr12_56824665_56826308	multiexon	TIMELESS-001	1	ENSG00000111602	ENST00000553532	ENSE00001282558	7	-	ENSG00000111602	ENST00000553532	ENSE00001282545	9	-
chr12_56871444_56872046	multiexon	GLS2-001	1	ENSG00000135423	ENST00000311966	ENSE00003661813	5	-	ENSG00000135423	ENST00000311966	ENSE00003560721	7	-
chr12_56997143_56999111	multiexon	BAZ2A-001	1	ENSG00000076108	ENST00000551812	ENSE00000749982	14	-	ENSG00000076108	ENST00000551812	ENSE00000749978	18	-
chr12_56998001_56999111	multiexon	BAZ2A-001	1	ENSG00000076108	ENST00000551812	ENSE00000749982	14	-	ENSG00000076108	ENST00000551812	ENSE00001145992	16	-
chr12_57064059_57066849	multiexon	PTGES3-001	1	ENSG00000110958	ENST00000262033	ENSE00003478503	2	-	ENSG00000110958	ENST00000262033	ENSE00003513659	5	-
chr12_57127931_57133147	multiexon	PRIM1-001	1	ENSG00000198056	ENST00000552590	ENSE00003667808	10	-	ENSG00000198056	ENST00000552590	ENSE00003482015	12	-
chr12_57135219_57137907	multiexon	PRIM1-001	1	ENSG00000198056	ENST00000552590	ENSE00003603433	6	-	ENSG00000198056	ENST00000552590	ENSE00003514591	9	-
chr12_57463017_57466695	multiexon	TMEM194A-001	1	ENSG00000166881	ENST00000300128	ENSE00003537754	2	-	ENSG00000166881	ENST00000300128	ENSE00003593955	4	-
chr12_57648631_57650294	putativeexon	R3HDM2-001	1	ENSG00000179912	ENST00000347140	ENSE00003708784	22	-	ENSG00000179912	ENST00000347140	ENSE00003705690	24	-
chr12_57891940_57892406	multiexon	MARS-002	2	ENSG00000166986	ENST00000537638	ENSE00003541791	9	+	ENSG00000166986	ENST00000537638	ENSE00003523871	10	+
chr12_58340778_58347472	multiexon	XRCC6BP1-001	1	ENSG00000166896	ENST00000300145	ENSE00003491231	3	+	ENSG00000166896	ENST00000300145	ENSE00003573232	5	+
chr12_60098553_60098799	monoexon	SLC16A7-001	1	ENSG00000118596	ENST00000261187	ENSE00003664624	2	+
chr12_62877950_62895478	multiexon	MON2-001	1	ENSG00000061987	ENST00000393632	ENSE00003579576	2	+	ENSG00000061987	ENST00000393632	ENSE00003578575	7	+
chr12_62892699_62895478	multiexon	MON2-001	1	ENSG00000061987	ENST00000393632	ENSE00003606969	5	+	ENSG00000061987	ENST00000393632	ENSE00003578575	7	+
chr12_63083479_63114069	multiexon	PPM1H-001	1	ENSG00000111110	ENST00000228705	ENSE00003478494	6	-	ENSG00000111110	ENST00000228705	ENSE00003632464	8	-
chr12_6442235_6443410	multiexon	TNFRSF1A-001	1	ENSG00000067182	ENST00000162749	ENSE00003524766	2	-	ENSG00000067182	ENST00000162749	ENSE00003632441	5	-
chr12_64456697_64458999	multiexon	SRGAP1-001	1	ENSG00000196935	ENST00000355086	ENSE00003545487	7	+	ENSG00000196935	ENST00000355086	ENSE00003477549	8	+
chr12_64456697_64480806	multiexon	SRGAP1-001	1	ENSG00000196935	ENST00000355086	ENSE00003545487	7	+	ENSG00000196935	ENST00000355086	ENSE00001177193	11	+
chr12_64803742_64810534	multiexon	XPOT-001	1	ENSG00000184575	ENST00000332707	ENSE00001327017	2	+	ENSG00000184575	ENST00000332707	ENSE00001328493	4	+
chr12_65702309_65722383	multiexon	MSRB3-002	2	ENSG00000174099	ENST00000308259	ENSE00003692858	2	+	ENSG00000174099	ENST00000308259	ENSE00001371716	4	+
chr12_65702309_65762806	multiexon	MSRB3-002	2	ENSG00000174099	ENST00000308259	ENSE00003692858	2	+	ENSG00000174099	ENST00000308259	ENSE00003600962	5	+
chr12_65720606_65762806	multiexon	MSRB3-001	1	ENSG00000174099	ENST00000355192	ENSE00001243871	2	+	ENSG00000174099	ENST00000355192	ENSE00003600962	4	+
chr12_6618883_6620418	multiexon	NCAPD2-001	1	ENSG00000010292	ENST00000315579	ENSE00003546109	3	+	ENSG00000010292	ENST00000315579	ENSE00003618388	6	+
chr12_6630152_6631203	multiexon	NCAPD2-001	1	ENSG00000010292	ENST00000315579	ENSE00003687839	14	+	ENSG00000010292	ENST00000315579	ENSE00003494198	15	+
chr12_6630964_6631203	monoexon	NCAPD2-001	1	ENSG00000010292	ENST00000315579	ENSE00003494198	15	+
chr12_6630964_6632512	multiexon	NCAPD2-001	1	ENSG00000010292	ENST00000315579	ENSE00003494198	15	+	ENSG00000010292	ENST00000315579	ENSE00003518940	17	+
chr12_6764804_6765964	multiexon	ING4-004	4	ENSG00000111653	ENST00000488381	ENSE00003478068	2	-	ENSG00000111653	ENST00000488381	ENSE00001813392	3	-
chr12_6859014_6859932	multiexon	MLF2-001	1	ENSG00000089693	ENST00000203630	ENSE00000715615	5	-	ENSG00000089693	ENST00000203630	ENSE00003581193	7	-
chr12_69084411_69094633	multiexon	NUP107-001	1	ENSG00000111581	ENST00000229179	ENSE00003587429	4	+	ENSG00000111581	ENST00000229179	ENSE00003466817	7	+
chr12_69090599_69096564	multiexon	NUP107-001	1	ENSG00000111581	ENST00000229179	ENSE00003588348	6	+	ENSG00000111581	ENST00000229179	ENSE00003500749	8	+
chr12_69109407_69119576	multiexon	NUP107-001	1	ENSG00000111581	ENST00000229179	ENSE00003689051	12	+	ENSG00000111581	ENST00000229179	ENSE00003654421	18	+
chr12_69109407_69121169	multiexon	NUP107-001	1	ENSG00000111581	ENST00000229179	ENSE00003689051	12	+	ENSG00000111581	ENST00000229179	ENSE00003661617	20	+
chr12_69210592_69218431	multiexon	MDM2-001	1	ENSG00000135679	ENST00000462284	ENSE00003527919	4	+	ENSG00000135679	ENST00000462284	ENSE00003674928	7	+
chr12_69644909_69656342	multiexon	CPSF6-001	1	ENSG00000111605	ENST00000435070	ENSE00003571977	2	+	ENSG00000111605	ENST00000435070	ENSE00001392118	9	+
chr12_6978422_6978937	multiexon	TPI1-001	1	ENSG00000111669	ENST00000229270	ENSE00003700131	4	+	ENSG00000111669	ENST00000229270	ENSE00003697036	5	+
chr12_69924070_69925836	intronic	FRS2-001	1
chr12_69983265_69985939	multiexon	CCT2-001	1	ENSG00000166226	ENST00000299300	ENSE00003487294	7	+	ENSG00000166226	ENST00000299300	ENSE00003566680	8	+
chr12_69983265_69987393	multiexon	CCT2-001	1	ENSG00000166226	ENST00000299300	ENSE00003487294	7	+	ENSG00000166226	ENST00000299300	ENSE00003656210	10	+
chr12_69985839_69987393	multiexon	CCT2-001	1	ENSG00000166226	ENST00000299300	ENSE00003566680	8	+	ENSG00000166226	ENST00000299300	ENSE00003656210	10	+
chr12_70149164_70150443	multiexon	RAB3IP-001	1	ENSG00000127328	ENST00000550536	ENSE00003536126	2	+	ENSG00000127328	ENST00000550536	ENSE00003487837	3	+
chr12_70193989_70195501	multiexon	RAB3IP-001	1	ENSG00000127328	ENST00000550536	ENSE00000871994	7	+	ENSG00000127328	ENST00000550536	ENSE00003689356	8	+
chr12_70671912_70704797	multiexon	CNOT2-001	1	ENSG00000111596	ENST00000418359	ENSE00003652343	3	+	ENSG00000111596	ENST00000418359	ENSE00003588175	4	+
chr12_70671912_70713144	multiexon	CNOT2-001	1	ENSG00000111596	ENST00000418359	ENSE00003652343	3	+	ENSG00000111596	ENST00000418359	ENSE00003681241	5	+
chr12_70901675_70916410	intronic	RP11-588H23.3-001	1
chr12_70903992_70916410	multiexon	RP11-588H23.3-001	1	ENSG00000258168	ENST00000548687	ENSE00002402305	2	+	ENSG00000258168	ENST00000548687	ENSE00002394612	7	+
chr12_7171571_7172603	multiexon	C1S-001	1	ENSG00000182326	ENST00000406697	ENSE00003561230	8	+	ENSG00000182326	ENST00000406697	ENSE00003636973	9	+
chr12_72020040_72022817	multiexon	ZFC3H1-001	1	ENSG00000133858	ENST00000378743	ENSE00000911429	20	-	ENSG00000133858	ENST00000378743	ENSE00000911427	22	-
chr12_72051306_72054207	intronic	ZFC3H1-001	1
chr12_72052410_72054207	intronic	ZFC3H1-001	1
chr12_72163580_72167802	multiexon	RAB21-001	1	ENSG00000080371	ENST00000261263	ENSE00001098832	2	+	ENSG00000080371	ENST00000261263	ENSE00003670280	4	+
chr12_76461151_76468019	multiexon	NAP1L1-001	1	ENSG00000187109	ENST00000261182	ENSE00003690648	2	-	ENSG00000187109	ENST00000261182	ENSE00003513689	4	-
chr12_76844631_76881398	multiexon	OSBPL8-001	1	ENSG00000091039	ENST00000261183	ENSE00003515427	2	-	ENSG00000091039	ENST00000261183	ENSE00003551237	4	-
chr12_77214838_77216311	multiexon	ZDHHC17-002	2	ENSG00000186908	ENST00000546778	ENSE00002415773	7	+	ENSG00000186908	ENST00000546778	ENSE00003612162	8	+
chr12_7980091_8083238	intergenic	RP11-277E18.2-001	1
chr12_79968646_79990438	intergenic	PAWR-001	1
chr12_79986391_79990438	putativeexon	PAWR-001	1	ENSG00000177425	ENST00000328827	ENSE00003620014	5	-	ENSG00000177425	ENST00000328827	ENSE00002347237	7	-
chr12_8082280_8083238	multiexon	SLC2A3-001	1	ENSG00000059804	ENST00000075120	ENSE00001801301	5	-	ENSG00000059804	ENST00000075120	ENSE00001659755	6	-
chr12_8083076_8084081	multiexon	SLC2A3-001	1	ENSG00000059804	ENST00000075120	ENSE00003600832	4	-	ENSG00000059804	ENST00000075120	ENSE00001801301	5	-
chr12_8083841_8084081	monoexon	SLC2A3-001	1	ENSG00000059804	ENST00000075120	ENSE00003600832	4	-
chr12_82763166_82796909	intronic	METTL25-001	1
chr12_82780582_82796909	multiexon	METTL25-001	1	ENSG00000127720	ENST00000248306	ENSE00003560476	2	+	ENSG00000127720	ENST00000248306	ENSE00003561003	5	+
chr12_83250789_83251359	monoexon	TMTC2-001	1	ENSG00000179104	ENST00000551915	ENSE00003574190	2	+
chr12_8808011_8808426	multiexon	MFAP5-001	1	ENSG00000197614	ENST00000359478	ENSE00003650359	4	-	ENSG00000197614	ENST00000359478	ENSE00003554439	5	-
chr12_8866407_8866637	monoexon	RIMKLB-001	1	ENSG00000166532	ENST00000535829	ENSE00003587193	2	+
chr12_89885713_89891119	multiexon	POC1B-001	1	ENSG00000139323	ENST00000313546	ENSE00003603671	3	-	ENSG00000139323	ENST00000313546	ENSE00003664596	4	-
chr12_90049456_90049884	monoexon	ATP2B1-001	1	ENSG00000070961	ENST00000428670	ENSE00002354641	2	-
chr12_922808_939326	multiexon	WNK1-001	1	ENSG00000060237	ENST00000315939	ENSE00000711927	2	+	ENSG00000060237	ENST00000315939	ENSE00000711974	4	+
chr12_93192668_93192862	monoexon	EEA1-001	1	ENSG00000102189	ENST00000322349	ENSE00000921607	21	-
chr12_936208_939326	multiexon	WNK1-001	1	ENSG00000060237	ENST00000315939	ENSE00000437674	3	+	ENSG00000060237	ENST00000315939	ENSE00000711974	4	+
chr12_95434252_95443009	multiexon	NR2C1-001	1	ENSG00000120798	ENST00000333003	ENSE00003580791	9	-	ENSG00000120798	ENST00000333003	ENSE00003538563	10	-
chr12_95451329_95451654	multiexon	NR2C1-001	1	ENSG00000120798	ENST00000333003	ENSE00003620687	6	-	ENSG00000120798	ENST00000333003	ENSE00003653608	7	-
chr12_95645716_95660408	multiexon	VEZT-001	1	ENSG00000028203	ENST00000436874	ENSE00003652184	2	+	ENSG00000028203	ENST00000436874	ENSE00003681444	5	+
chr12_96076483_96077487	multiexon	NTN4-001	1	ENSG00000074527	ENST00000343702	ENSE00001192793	6	-	ENSG00000074527	ENST00000343702	ENSE00001192786	7	-
chr12_96707099_96728643	multiexon	CDK17-001	1	ENSG00000059758	ENST00000261211	ENSE00003688747	2	-	ENSG00000059758	ENST00000261211	ENSE00000994210	4	-
chr12_96717726_96728643	multiexon	CDK17-001	1	ENSG00000059758	ENST00000261211	ENSE00003688747	2	-	ENSG00000059758	ENST00000261211	ENSE00003637695	3	-
chr12_98921664_98931350	multiexon	TMPO-002	2	ENSG00000120802	ENST00000556029	ENSE00003601997	2	+	ENSG00000120802	ENST00000556029	ENSE00000922719	4	+
chr12_98989211_98989439	putativeexon	SLC25A3-003	3	ENSG00000075415	ENST00000546766	ENSE00002336243	2	+
chr12_99071203_99080651	multiexon	APAF1-001	1	ENSG00000120868	ENST00000359972	ENSE00000818039	13	+	ENSG00000120868	ENST00000359972	ENSE00000818044	16	+
chr13_100909849_100925600	multiexon	PCCA-001	1	ENSG00000175198	ENST00000376285	ENSE00001673087	9	+	ENSG00000175198	ENST00000376285	ENSE00001593748	12	+
chr13_100925450_100992513	multiexon	PCCA-001	1	ENSG00000175198	ENST00000376285	ENSE00001593748	12	+	ENSG00000175198	ENST00000376285	ENSE00003588433	18	+
chr13_100953714_100962162	multiexon	PCCA-001	1	ENSG00000175198	ENST00000376285	ENSE00001652442	13	+	ENSG00000175198	ENST00000376285	ENSE00001665361	16	+
chr13_100953714_100992513	multiexon	PCCA-001	1	ENSG00000175198	ENST00000376285	ENSE00001652442	13	+	ENSG00000175198	ENST00000376285	ENSE00003588433	18	+
chr13_100959446_100992513	multiexon	PCCA-001	1	ENSG00000175198	ENST00000376285	ENSE00001629467	15	+	ENSG00000175198	ENST00000376285	ENSE00003588433	18	+
chr13_100982815_100992513	multiexon	PCCA-001	1	ENSG00000175198	ENST00000376285	ENSE00001696369	17	+	ENSG00000175198	ENST00000376285	ENSE00003588433	18	+
chr13_101881744_101944717	multiexon	NALCN-001	1	ENSG00000102452	ENST00000251127	ENSE00003632562	8	-	ENSG00000102452	ENST00000251127	ENSE00003585561	13	-
chr13_101910794_101944717	multiexon	NALCN-001	1	ENSG00000102452	ENST00000251127	ENSE00003632562	8	-	ENSG00000102452	ENST00000251127	ENSE00003508516	11	-
chr13_101936284_101944717	multiexon	NALCN-001	1	ENSG00000102452	ENST00000251127	ENSE00003632562	8	-	ENSG00000102452	ENST00000251127	ENSE00003623152	10	-
chr13_101997617_102051516	multiexon	NALCN-001	1	ENSG00000102452	ENST00000251127	ENSE00003624284	2	-	ENSG00000102452	ENST00000251127	ENSE00003644739	7	-
chr13_102047534_102051516	multiexon	NALCN-001	1	ENSG00000102452	ENST00000251127	ENSE00003624284	2	-	ENSG00000102452	ENST00000251127	ENSE00003538255	3	-
chr13_103275227_103279516	multiexon	TPP2-001	1	ENSG00000134900	ENST00000376065	ENSE00000917069	6	+	ENSG00000134900	ENST00000376065	ENSE00000917070	7	+
chr13_103275227_103280274	multiexon	TPP2-001	1	ENSG00000134900	ENST00000376065	ENSE00000917069	6	+	ENSG00000134900	ENST00000376065	ENSE00003673315	8	+
chr13_103468778_103474509	multiexon	BIVM-ERCC5-001	1	ENSG00000270181	ENST00000602836	ENSE00003689888	2	+	ENSG00000270181	ENST00000602836	ENSE00003663396	5	+
chr13_108269565_108287727	intronic	FAM155A-001	1
chr13_111274563_111276626	multiexon	CARKD-001	1	ENSG00000213995	ENST00000309957	ENSE00003518581	2	+	ENSG00000213995	ENST00000309957	ENSE00003548479	3	+
chr13_111274563_111279894	multiexon	CARKD-001	1	ENSG00000213995	ENST00000309957	ENSE00003518581	2	+	ENSG00000213995	ENST00000309957	ENSE00003575390	5	+
chr13_111303381_111319820	multiexon	CARS2-001	1	ENSG00000134905	ENST00000257347	ENSE00003466043	8	-	ENSG00000134905	ENST00000257347	ENSE00003575575	10	-
chr13_111303381_111335481	multiexon	CARS2-001	1	ENSG00000134905	ENST00000257347	ENSE00003657475	6	-	ENSG00000134905	ENST00000257347	ENSE00003575575	10	-
chr13_111870026_111885640	multiexon	ARHGEF7-001	1	ENSG00000102606	ENST00000218789	ENSE00003537040	4	+	ENSG00000102606	ENST00000218789	ENSE00003519925	5	+
chr13_111870026_111896641	multiexon	ARHGEF7-001	1	ENSG00000102606	ENST00000218789	ENSE00003537040	4	+	ENSG00000102606	ENST00000218789	ENSE00003675354	7	+
chr13_113158346_113181798	multiexon	TUBGCP3-001	1	ENSG00000126216	ENST00000261965	ENSE00003541399	12	-	ENSG00000126216	ENST00000261965	ENSE00000687313	19	-
chr13_113170754_113176823	multiexon	TUBGCP3-001	1	ENSG00000126216	ENST00000261965	ENSE00003581926	14	-	ENSG00000126216	ENST00000261965	ENSE00000862464	17	-
chr13_113170754_113181798	multiexon	TUBGCP3-001	1	ENSG00000126216	ENST00000261965	ENSE00003541399	12	-	ENSG00000126216	ENST00000261965	ENSE00000862464	17	-
chr13_113669077_113679072	multiexon	MCF2L-001	1	ENSG00000126217	ENST00000375608	ENSE00003527070	3	+	ENSG00000126217	ENST00000375608	ENSE00001756561	4	+
chr13_113669077_113699675	multiexon	MCF2L-001	1	ENSG00000126217	ENST00000375608	ENSE00003527070	3	+	ENSG00000126217	ENST00000375608	ENSE00003485448	5	+
chr13_113845186_113854830	multiexon	PCID2-001	1	ENSG00000126226	ENST00000375479	ENSE00003468541	2	-	ENSG00000126226	ENST00000375479	ENSE00003526446	7	-
chr13_113850495_113854830	multiexon	PCID2-001	1	ENSG00000126226	ENST00000375479	ENSE00003468541	2	-	ENSG00000126226	ENST00000375479	ENSE00003554023	5	-
chr13_114164553_114175048	multiexon	TMCO3-006	6	ENSG00000150403	ENST00000474393	ENSE00003461490	7	+	ENSG00000150403	ENST00000474393	ENSE00003558372	8	+
chr13_114164553_114188555	putativeexon	TMCO3-006	6	ENSG00000150403	ENST00000474393	ENSE00003461490	7	+	ENSG00000150403	ENST00000474393	ENSE00001819392	9	+
chr13_114164553_114193822	multiexon	TMCO3-007	7	ENSG00000150403	ENST00000434316	ENSE00003683310	7	+	ENSG00000150403	ENST00000434316	ENSE00001191953	10	+
chr13_114174931_114188555	putativeexon	TMCO3-006	6	ENSG00000150403	ENST00000474393	ENSE00003558372	8	+	ENSG00000150403	ENST00000474393	ENSE00001819392	9	+
chr13_114174931_114193822	multiexon	TMCO3-007	7	ENSG00000150403	ENST00000434316	ENSE00003647184	8	+	ENSG00000150403	ENST00000434316	ENSE00001191953	10	+
chr13_114541042_114542823	multiexon	GAS6-001	1	ENSG00000183087	ENST00000327773	ENSE00001291358	5	-	ENSG00000183087	ENST00000327773	ENSE00001314682	6	-
chr13_114806476_114839312	multiexon	RASA3-001	1	ENSG00000185989	ENST00000334062	ENSE00003600219	2	-	ENSG00000185989	ENST00000334062	ENSE00001334956	4	-
chr13_114817527_114839312	multiexon	RASA3-001	1	ENSG00000185989	ENST00000334062	ENSE00003600219	2	-	ENSG00000185989	ENST00000334062	ENSE00001334957	3	-
chr13_20235838_20244503	multiexon	MPHOSPH8-001	1	ENSG00000196199	ENST00000361479	ENSE00001598583	8	+	ENSG00000196199	ENST00000361479	ENSE00000678074	12	+
chr13_20279802_20283739	multiexon	PSPC1-002	2	ENSG00000121390	ENST00000338910	ENSE00001596908	7	-	ENSG00000121390	ENST00000338910	ENSE00001705148	8	-
chr13_20325411_20333558	multiexon	PSPC1-001	1	ENSG00000121390	ENST00000471658	ENSE00000822389	3	-	ENSG00000121390	ENST00000471658	ENSE00000822388	4	-
chr13_20425495_20426330	multiexon	ZMYM5-001	1	ENSG00000132950	ENST00000382907	ENSE00001637679	3	-	ENSG00000132950	ENST00000382907	ENSE00001795699	4	-
chr13_20576990_20580726	multiexon	ZMYM2-003	3	ENSG00000121741	ENST00000382874	ENSE00001671344	5	+	ENSG00000121741	ENST00000382874	ENSE00001781669	7	+
chr13_21305980_21306260	monoexon	N6AMT2-001	1	ENSG00000150456	ENST00000382754	ENSE00003423777	4	-
chr13_21436856_21442840	multiexon	XPO4-001	1	ENSG00000132953	ENST00000255305	ENSE00003461946	2	-	ENSG00000132953	ENST00000255305	ENSE00003632528	3	-
chr13_21619824_21620369	monoexon	LATS2-001	1	ENSG00000150457	ENST00000382592	ENSE00001492905	2	-
chr13_21746478_21746820	multiexon	SKA3-001	1	ENSG00000165480	ENST00000314759	ENSE00003499323	2	-	ENSG00000165480	ENST00000314759	ENSE00003668602	3	-
chr13_21955573_21965993	multiexon	ZDHHC20-001	1	ENSG00000180776	ENST00000400590	ENSE00003479993	8	-	ENSG00000180776	ENST00000400590	ENSE00003638016	11	-
chr13_22088492_22113827	multiexon	MICU2-001	1	ENSG00000165487	ENST00000382374	ENSE00003525560	3	-	ENSG00000165487	ENST00000382374	ENSE00003478066	7	-
chr13_22088492_22122056	intronic	MICU2-001	1
chr13_22095384_22113827	multiexon	MICU2-001	1	ENSG00000165487	ENST00000382374	ENSE00003525560	3	-	ENSG00000165487	ENST00000382374	ENSE00003516814	6	-
chr13_22095384_22122056	intronic	MICU2-001	1
chr13_24410379_24415627	multiexon	MIPEP-001	1	ENSG00000027001	ENST00000382172	ENSE00000354829	11	-	ENSG00000027001	ENST00000382172	ENSE00000678997	14	-
chr13_24796957_24798720	monoexon	RP11-307N16.6-001	1	ENSG00000273167	ENST00000382141	ENSE00003710129	4	+
chr13_24796957_24798720	putativeexon	SPATA13-007	7	ENSG00000182957	ENST00000466831	ENSE00002277449	2	+
chr13_25049610_25052414	multiexon	PARP4-001	1	ENSG00000102699	ENST00000381989	ENSE00000679133	13	-	ENSG00000102699	ENST00000381989	ENSE00000679131	15	-
chr13_25051839_25052414	multiexon	PARP4-001	1	ENSG00000102699	ENST00000381989	ENSE00000679133	13	-	ENSG00000102699	ENST00000381989	ENSE00000679132	14	-
chr13_26898909_26928017	intronic	CDK8-001	1
chr13_26911704_26928017	multiexon	CDK8-001	1	ENSG00000132964	ENST00000381527	ENSE00003532430	2	+	ENSG00000132964	ENST00000381527	ENSE00003633174	4	+
chr13_26911704_26959479	multiexon	CDK8-001	1	ENSG00000132964	ENST00000381527	ENSE00003532430	2	+	ENSG00000132964	ENST00000381527	ENSE00003497239	6	+
chr13_26923209_26928017	multiexon	CDK8-001	1	ENSG00000132964	ENST00000381527	ENSE00003636628	3	+	ENSG00000132964	ENST00000381527	ENSE00003633174	4	+
chr13_27183466_27187195	intronic	WASF3-001	1
chr13_27649328_27664295	multiexon	USP12-001	1	ENSG00000152484	ENST00000282344	ENSE00001005457	5	-	ENSG00000152484	ENST00000282344	ENSE00001005463	7	-
chr13_28155434_28155940	monoexon	LNX2-001	1	ENSG00000139517	ENST00000316334	ENSE00001157716	2	-
chr13_28748409_28752072	multiexon	PAN3-001	1	ENSG00000152520	ENST00000399613	ENSE00003505088	2	+	ENSG00000152520	ENST00000399613	ENSE00003602204	4	+
chr13_28748409_28771483	multiexon	PAN3-002	2	ENSG00000152520	ENST00000380958	ENSE00003486277	2	+	ENSG00000152520	ENST00000380958	ENSE00003555811	5	+
chr13_28748409_28794515	multiexon	PAN3-001	1	ENSG00000152520	ENST00000399613	ENSE00003505088	2	+	ENSG00000152520	ENST00000399613	ENSE00003491918	5	+
chr13_28771322_28794515	multiexon	PAN3-002	2	ENSG00000152520	ENST00000380958	ENSE00003555811	5	+	ENSG00000152520	ENST00000380958	ENSE00003491918	6	+
chr13_28830429_28835595	multiexon	PAN3-001	1	ENSG00000152520	ENST00000399613	ENSE00003655221	6	+	ENSG00000152520	ENST00000399613	ENSE00003464717	8	+
chr13_28830429_28845003	multiexon	PAN3-001	1	ENSG00000152520	ENST00000399613	ENSE00003655221	6	+	ENSG00000152520	ENST00000399613	ENSE00003587244	12	+
chr13_28840852_28845003	multiexon	PAN3-001	1	ENSG00000152520	ENST00000399613	ENSE00003673271	9	+	ENSG00000152520	ENST00000399613	ENSE00003587244	12	+
chr13_28840855_28845003	putativeexon	PAN3-001	1	ENSG00000152520	ENST00000399613	ENSE00003673271	9	+	ENSG00000152520	ENST00000399613	ENSE00003587244	12	+
chr13_30104675_30110339	multiexon	SLC7A1-001	1	ENSG00000139514	ENST00000380752	ENSE00001486219	3	-	ENSG00000139514	ENST00000380752	ENSE00000938507	5	-
chr13_30104675_30127997	multiexon	SLC7A1-001	1	ENSG00000139514	ENST00000380752	ENSE00001361445	2	-	ENSG00000139514	ENST00000380752	ENSE00000938507	5	-
chr13_30341236_30351400	putativeexon	UBL3-001	1	ENSG00000122042	ENST00000380680	ENSE00001376114	2	-	ENSG00000122042	ENST00000380680	ENSE00001485939	5	-
chr13_30826068_30829752	intronic	KATNAL1-001	1
chr13_30854200_30857928	multiexon	KATNAL1-001	1	ENSG00000102781	ENST00000380615	ENSE00000679860	2	-	ENSG00000102781	ENST00000380615	ENSE00000679854	3	-
chr13_31204972_31205611	monoexon	USPL1-001	1	ENSG00000132952	ENST00000255304	ENSE00003559186	4	+
chr13_31789188_31803431	multiexon	B3GALTL-001	1	ENSG00000187676	ENST00000343307	ENSE00001364232	2	+	ENSG00000187676	ENST00000343307	ENSE00001369560	4	+
chr13_33054727_33101669	intronic	N4BP2L2-001	1
chr13_33091994_33101669	putativeexon	N4BP2L2-001	1	ENSG00000244754	ENST00000267068	ENSE00003628457	3	-	ENSG00000244754	ENST00000267068	ENSE00003667303	6	-
chr13_33268360_33284243	multiexon	PDS5B-006	6	ENSG00000083642	ENST00000315596	ENSE00001788262	14	+	ENSG00000083642	ENST00000315596	ENSE00001657461	19	+
chr13_33306238_33309467	multiexon	PDS5B-006	6	ENSG00000083642	ENST00000315596	ENSE00001775182	20	+	ENSG00000083642	ENST00000315596	ENSE00001718449	21	+
chr13_33306238_33320238	multiexon	PDS5B-006	6	ENSG00000083642	ENST00000315596	ENSE00001775182	20	+	ENSG00000083642	ENST00000315596	ENSE00001717883	24	+
chr13_33315218_33320238	multiexon	PDS5B-006	6	ENSG00000083642	ENST00000315596	ENSE00001774967	22	+	ENSG00000083642	ENST00000315596	ENSE00001717883	24	+
chr13_35615070_35619538	multiexon	NBEA-001	1	ENSG00000172915	ENST00000379939	ENSE00001604367	2	+	ENSG00000172915	ENST00000379939	ENSE00001628436	4	+
chr13_36822743_36828280	multiexon	CCDC169-001	1	ENSG00000242715	ENST00000510088	ENSE00003607804	4	-	ENSG00000242715	ENST00000510088	ENSE00003558291	6	-
chr13_36822743_36828280	multiexon	SOHLH2-201	201	ENSG00000120669	ENST00000554962	ENSE00003516931	3	-	ENSG00000120669	ENST00000554962	ENSE00003636941	5	-
chr13_36857606_36869994	multiexon	CCDC169-008	8	ENSG00000242715	ENST00000477250	ENSE00003485123	2	-	ENSG00000242715	ENST00000477250	ENSE00003503162	4	-
chr13_36939637_36943737	putativeexon	SPG20OS-003	3	ENSG00000120664	ENST00000488319	ENSE00003490410	2	+	ENSG00000120664	ENST00000488319	ENSE00001857856	5	+
chr13_37614542_37625720	multiexon	SUPT20H-001	1	ENSG00000102710	ENST00000360252	ENSE00003606180	2	-	ENSG00000102710	ENST00000360252	ENSE00003684274	9	-
chr13_40239233_40254182	multiexon	COG6-001	1	ENSG00000133103	ENST00000416691	ENSE00003554166	4	+	ENSG00000133103	ENST00000416691	ENSE00003537288	7	+
chr13_40268771_40301685	multiexon	COG6-001	1	ENSG00000133103	ENST00000416691	ENSE00003544206	12	+	ENSG00000133103	ENST00000416691	ENSE00003651291	18	+
chr13_41207284_41219623	intronic	FOXO1-001	1
chr13_41482295_41486859	intronic	SUGT1P3-002	2
chr13_41515057_41515506	monoexon	ELF1-001	1	ENSG00000120690	ENST00000498824	ENSE00003536434	8	-
chr13_41826781_41828756	putativeexon	MTRF1-003	3	ENSG00000120662	ENST00000480434	ENSE00003514336	2	-	ENSG00000120662	ENST00000480434	ENSE00001892972	4	-
chr13_41826781_41835051	multiexon	MTRF1-006	6	ENSG00000120662	ENST00000379480	ENSE00003650223	2	-	ENSG00000120662	ENST00000379480	ENSE00001289086	5	-
chr13_42352121_42393522	multiexon	VWA8-002	2	ENSG00000102763	ENST00000281496	ENSE00000681075	15	-	ENSG00000102763	ENST00000281496	ENSE00000907544	20	-
chr13_42385361_42393522	multiexon	VWA8-002	2	ENSG00000102763	ENST00000281496	ENSE00000681075	15	-	ENSG00000102763	ENST00000281496	ENSE00000939539	17	-
chr13_42385361_42407667	multiexon	VWA8-002	2	ENSG00000102763	ENST00000281496	ENSE00001672863	13	-	ENSG00000102763	ENST00000281496	ENSE00000939539	17	-
chr13_42439872_42442613	multiexon	VWA8-002	2	ENSG00000102763	ENST00000281496	ENSE00001182005	10	-	ENSG00000102763	ENST00000281496	ENSE00001281865	12	-
chr13_42439872_42461497	multiexon	VWA8-002	2	ENSG00000102763	ENST00000281496	ENSE00001376872	6	-	ENSG00000102763	ENST00000281496	ENSE00001281865	12	-
chr13_42693231_42703768	intronic	DGKH-001	1
chr13_42742576_42761284	multiexon	DGKH-001	1	ENSG00000102780	ENST00000261491	ENSE00003542301	10	+	ENSG00000102780	ENST00000261491	ENSE00003484813	14	+
chr13_43639822_43659974	multiexon	DNAJC15-001	1	ENSG00000120675	ENST00000379221	ENSE00003558761	2	+	ENSG00000120675	ENST00000379221	ENSE00000817255	5	+
chr13_43986052_43987124	multiexon	ENOX1-001	1	ENSG00000120658	ENST00000261488	ENSE00001181637	4	-	ENSG00000120658	ENST00000261488	ENSE00000817266	5	-
chr13_45725822_45781640	multiexon	GTF2F2-001	1	ENSG00000188342	ENST00000340473	ENSE00001370421	4	+	ENSG00000188342	ENST00000340473	ENSE00001364027	5	+
chr13_46090278_46093229	multiexon	COG3-001	1	ENSG00000136152	ENST00000349995	ENSE00000923389	17	+	ENSG00000136152	ENST00000349995	ENSE00001245412	19	+
chr13_46090278_46099186	multiexon	COG3-001	1	ENSG00000136152	ENST00000349995	ENSE00000923389	17	+	ENSG00000136152	ENST00000349995	ENSE00003669852	20	+
chr13_46090278_46104053	multiexon	COG3-001	1	ENSG00000136152	ENST00000349995	ENSE00000923389	17	+	ENSG00000136152	ENST00000349995	ENSE00003645687	21	+
chr13_46090278_46104915	multiexon	COG3-001	1	ENSG00000136152	ENST00000349995	ENSE00000923389	17	+	ENSG00000136152	ENST00000349995	ENSE00003572758	22	+
chr13_47224336_47243291	multiexon	LRCH1-001	1	ENSG00000136141	ENST00000389798	ENSE00003537221	2	+	ENSG00000136141	ENST00000389798	ENSE00003644993	3	+
chr13_47285926_47308133	multiexon	LRCH1-001	1	ENSG00000136141	ENST00000389798	ENSE00000836792	14	+	ENSG00000136141	ENST00000389798	ENSE00000462919	18	+
chr13_47297356_47303119	multiexon	LRCH1-001	1	ENSG00000136141	ENST00000389798	ENSE00000836794	16	+	ENSG00000136141	ENST00000389798	ENSE00000923426	17	+
chr13_47297356_47308133	multiexon	LRCH1-001	1	ENSG00000136141	ENST00000389798	ENSE00000836794	16	+	ENSG00000136141	ENST00000389798	ENSE00000462919	18	+
chr13_48523075_48528692	multiexon	SUCLA2-001	1	ENSG00000136143	ENST00000378654	ENSE00002708627	7	-	ENSG00000136143	ENST00000378654	ENSE00003678376	10	-
chr13_48562676_48571158	multiexon	SUCLA2-001	1	ENSG00000136143	ENST00000378654	ENSE00003612075	2	-	ENSG00000136143	ENST00000378654	ENSE00003458765	4	-
chr13_49761258_49762769	multiexon	FNDC3A-002	2	ENSG00000102531	ENST00000398316	ENSE00001129131	14	+	ENSG00000102531	ENST00000398316	ENSE00001129122	15	+
chr13_49771013_49772710	multiexon	FNDC3A-002	2	ENSG00000102531	ENST00000398316	ENSE00003685468	18	+	ENSG00000102531	ENST00000398316	ENSE00003636520	21	+
chr13_50025689_50026045	monoexon	SETDB2-001	1	ENSG00000136169	ENST00000317257	ENSE00001428781	2	+
chr13_50025689_50035298	multiexon	SETDB2-001	1	ENSG00000136169	ENST00000317257	ENSE00001428781	2	+	ENSG00000136169	ENST00000317257	ENSE00000923456	4	+
chr13_50025689_50042096	multiexon	SETDB2-001	1	ENSG00000136169	ENST00000317257	ENSE00001428781	2	+	ENSG00000136169	ENST00000317257	ENSE00000923457	6	+
chr13_50279757_50280508	multiexon	KPNA3-001	1	ENSG00000102753	ENST00000261667	ENSE00001621952	13	-	ENSG00000102753	ENST00000261667	ENSE00000682718	15	-
chr13_51501543_51509135	multiexon	RNASEH2B-001	1	ENSG00000136104	ENST00000336617	ENSE00003687422	2	+	ENSG00000136104	ENST00000336617	ENSE00003686481	5	+
chr13_51501543_51523641	multiexon	RNASEH2B-001	1	ENSG00000136104	ENST00000336617	ENSE00003687422	2	+	ENSG00000136104	ENST00000336617	ENSE00003580818	9	+
chr13_51893807_51894187	intergenic
chr13_52971367_52972329	monoexon	THSD1-001	1	ENSG00000136114	ENST00000258613	ENSE00000923563	3	-
chr13_52992127_53000201	multiexon	VPS36-001	1	ENSG00000136100	ENST00000378060	ENSE00000923570	9	-	ENSG00000136100	ENST00000378060	ENSE00000923568	11	-
chr13_52992127_53001354	multiexon	VPS36-001	1	ENSG00000136100	ENST00000378060	ENSE00003652779	7	-	ENSG00000136100	ENST00000378060	ENSE00000923568	11	-
chr13_60407241_60413582	multiexon	DIAPH3-001	1	ENSG00000139734	ENST00000400324	ENSE00003483811	23	-	ENSG00000139734	ENST00000400324	ENSE00003629986	24	-
chr13_60485869_60490383	multiexon	DIAPH3-001	1	ENSG00000139734	ENST00000400324	ENSE00003501884	19	-	ENSG00000139734	ENST00000400324	ENSE00003617117	20	-
chr13_60485869_60499004	multiexon	DIAPH3-001	1	ENSG00000139734	ENST00000400324	ENSE00003644351	18	-	ENSG00000139734	ENST00000400324	ENSE00003617117	20	-
chr13_60667762_60686320	multiexon	DIAPH3-001	1	ENSG00000139734	ENST00000400324	ENSE00001806741	3	-	ENSG00000139734	ENST00000400324	ENSE00001751108	4	-
chr13_60667762_60707123	multiexon	DIAPH3-001	1	ENSG00000139734	ENST00000400324	ENSE00001634806	2	-	ENSG00000139734	ENST00000400324	ENSE00001751108	4	-
chr13_61013822_61034674	multiexon	TDRD3-001	1	ENSG00000083544	ENST00000377894	ENSE00003598370	2	+	ENSG00000083544	ENST00000377894	ENSE00003591424	4	+
chr13_61013822_61041513	multiexon	TDRD3-001	1	ENSG00000083544	ENST00000377894	ENSE00003598370	2	+	ENSG00000083544	ENST00000377894	ENSE00001205839	5	+
chr13_61013822_61060082	multiexon	TDRD3-001	1	ENSG00000083544	ENST00000377894	ENSE00003598370	2	+	ENSG00000083544	ENST00000377894	ENSE00003500698	7	+
chr13_61018817_61041513	multiexon	TDRD3-003	3	ENSG00000083544	ENST00000377881	ENSE00003687535	3	+	ENSG00000083544	ENST00000377881	ENSE00001205839	5	+
chr13_61034514_61041513	multiexon	TDRD3-001	1	ENSG00000083544	ENST00000377894	ENSE00003591424	4	+	ENSG00000083544	ENST00000377894	ENSE00001205839	5	+
chr13_64564229_64577598	multiexon	LINC00355-001	1	ENSG00000227674	ENST00000456627	ENSE00001637192	3	-	ENSG00000227674	ENST00000456627	ENSE00001685608	5	-
chr13_64564229_64608670	multiexon	LINC00355-001	1	ENSG00000227674	ENST00000456627	ENSE00001761432	2	-	ENSG00000227674	ENST00000456627	ENSE00001685608	5	-
chr13_64793357_64819610	intergenic
chr13_73467922_73505405	multiexon	PIBF1-001	1	ENSG00000083535	ENST00000326291	ENSE00000802359	11	+	ENSG00000083535	ENST00000326291	ENSE00001382240	14	+
chr13_74506372_74518207	intronic	KLF12-001	1
chr13_75900333_75923438	multiexon	TBC1D4-001	1	ENSG00000136111	ENST00000377636	ENSE00003625372	5	-	ENSG00000136111	ENST00000377636	ENSE00003484499	10	-
chr13_75930283_75936743	multiexon	TBC1D4-001	1	ENSG00000136111	ENST00000377636	ENSE00003522821	2	-	ENSG00000136111	ENST00000377636	ENSE00003673887	4	-
chr13_76134889_76143643	multiexon	RP11-29G8.3-001	1	ENSG00000261553	ENST00000563635	ENSE00003484188	3	+	ENSG00000261553	ENST00000563635	ENSE00003646379	6	+
chr13_76134889_76143643	multiexon	UCHL3-001	1	ENSG00000118939	ENST00000377595	ENSE00003599610	3	+	ENSG00000118939	ENST00000377595	ENSE00003480463	6	+
chr13_76134889_76169126	multiexon	RP11-29G8.3-001	1	ENSG00000261553	ENST00000563635	ENSE00003484188	3	+	ENSG00000261553	ENST00000563635	ENSE00003685022	7	+
chr13_76134889_76169126	multiexon	UCHL3-001	1	ENSG00000118939	ENST00000377595	ENSE00003599610	3	+	ENSG00000118939	ENST00000377595	ENSE00003689061	7	+
chr13_76195899_76301234	multiexon	RP11-29G8.3-001	1	ENSG00000261553	ENST00000563635	ENSE00002579899	8	+	ENSG00000261553	ENST00000563635	ENSE00003523650	10	+
chr13_76195899_76301234	putativeexon	LMO7-001	1	ENSG00000136153	ENST00000341547	ENSE00001764632	1	+	ENSG00000136153	ENST00000341547	ENSE00003543340	4	+
chr13_76287318_76335174	multiexon	LMO7-001	1	ENSG00000136153	ENST00000341547	ENSE00003682507	3	+	ENSG00000136153	ENST00000341547	ENSE00003520161	5	+
chr13_76287318_76335174	multiexon	RP11-29G8.3-001	1	ENSG00000261553	ENST00000563635	ENSE00003514330	9	+	ENSG00000261553	ENST00000563635	ENSE00003521160	11	+
chr13_77700453_77703365	multiexon	MYCBP2-005	5	ENSG00000005810	ENST00000498073	ENSE00001931917	4	-	ENSG00000005810	ENST00000498073	ENSE00003535822	5	-
chr13_79951514_79953042	multiexon	RBM26-002	2	ENSG00000139746	ENST00000267229	ENSE00003570558	2	-	ENSG00000139746	ENST00000267229	ENSE00001766507	3	-
chr13_80080303_80095110	intronic	NDFIP2-001	1
chr13_80094945_80113910	multiexon	NDFIP2-001	1	ENSG00000102471	ENST00000218652	ENSE00000684824	2	+	ENSG00000102471	ENST00000218652	ENSE00000802664	4	+
chr13_80094945_80122529	multiexon	NDFIP2-001	1	ENSG00000102471	ENST00000218652	ENSE00000684824	2	+	ENSG00000102471	ENST00000218652	ENSE00003470694	6	+
chr13_83637349_83676411	intergenic
chr13_88099351_88163725	multiexon	MIR4500HG-001	1	ENSG00000228824	ENST00000436290	ENSE00001596474	2	-	ENSG00000228824	ENST00000436290	ENSE00001735343	5	-
chr13_95686859_95715113	multiexon	ABCC4-001	1	ENSG00000125257	ENST00000376887	ENSE00000853772	26	-	ENSG00000125257	ENST00000376887	ENSE00001101565	30	-
chr13_95813443_95818621	multiexon	ABCC4-001	1	ENSG00000125257	ENST00000376887	ENSE00000853761	15	-	ENSG00000125257	ENST00000376887	ENSE00000853765	19	-
chr13_95813443_95822882	multiexon	ABCC4-001	1	ENSG00000125257	ENST00000376887	ENSE00003522147	14	-	ENSG00000125257	ENST00000376887	ENSE00000853765	19	-
chr13_95858786_95863035	multiexon	ABCC4-001	1	ENSG00000125257	ENST00000376887	ENSE00003516540	5	-	ENSG00000125257	ENST00000376887	ENSE00003531806	8	-
chr13_96361481_96377506	multiexon	DNAJC3-001	1	ENSG00000102580	ENST00000602402	ENSE00000853793	2	+	ENSG00000102580	ENST00000602402	ENSE00000853791	4	+
chr13_96375496_96377506	multiexon	DNAJC3-001	1	ENSG00000102580	ENST00000602402	ENSE00000853792	3	+	ENSG00000102580	ENST00000602402	ENSE00000853791	4	+
chr13_96409898_96416207	multiexon	DNAJC3-001	1	ENSG00000102580	ENST00000602402	ENSE00000853788	5	+	ENSG00000102580	ENST00000602402	ENSE00000853784	9	+
chr13_96485181_96489456	multiexon	UGGT2-001	1	ENSG00000102595	ENST00000376747	ENSE00001596588	37	-	ENSG00000102595	ENST00000376747	ENSE00001611631	38	-
chr13_96622366_96648389	multiexon	UGGT2-001	1	ENSG00000102595	ENST00000376747	ENSE00003684355	7	-	ENSG00000102595	ENST00000376747	ENSE00000916979	12	-
chr13_96622366_96651561	multiexon	UGGT2-001	1	ENSG00000102595	ENST00000376747	ENSE00003664403	6	-	ENSG00000102595	ENST00000376747	ENSE00000916979	12	-
chr13_96636058_96648389	multiexon	UGGT2-001	1	ENSG00000102595	ENST00000376747	ENSE00003684355	7	-	ENSG00000102595	ENST00000376747	ENSE00003690999	10	-
chr13_96636058_96651561	multiexon	UGGT2-001	1	ENSG00000102595	ENST00000376747	ENSE00003664403	6	-	ENSG00000102595	ENST00000376747	ENSE00003690999	10	-
chr13_96637493_96648389	putativeexon	UGGT2-002	2	ENSG00000102595	ENST00000467305	ENSE00003554689	3	-	ENSG00000102595	ENST00000467305	ENSE00001882657	7	-
chr13_96638587_96648389	multiexon	UGGT2-001	1	ENSG00000102595	ENST00000376747	ENSE00003684355	7	-	ENSG00000102595	ENST00000376747	ENSE00003603252	9	-
chr13_96665561_96684225	multiexon	UGGT2-001	1	ENSG00000102595	ENST00000376747	ENSE00001634669	2	-	ENSG00000102595	ENST00000376747	ENSE00000853836	5	-
chr13_96837104_96840751	intronic	HS6ST3-001	1
chr13_98865474_98865667	monoexon	FARP1-001	1	ENSG00000152767	ENST00000319562	ENSE00002702764	2	+
chr13_99061592_99064288	multiexon	FARP1-001	1	ENSG00000152767	ENST00000319562	ENSE00003571606	14	+	ENSG00000152767	ENST00000319562	ENSE00003493549	16	+
chr13_99061592_99076904	multiexon	FARP1-001	1	ENSG00000152767	ENST00000319562	ENSE00003571606	14	+	ENSG00000152767	ENST00000319562	ENSE00003666123	17	+
chr13_99109422_99118815	multiexon	STK24-001	1	ENSG00000102572	ENST00000397517	ENSE00001143743	6	-	ENSG00000102572	ENST00000397517	ENSE00001007034	10	-
chr13_99134519_99171727	multiexon	STK24-001	1	ENSG00000102572	ENST00000397517	ENSE00003596350	2	-	ENSG00000102572	ENST00000397517	ENSE00003474465	3	-
chr13_99157169_99171727	intronic	STK24-001	1
chr13_99171497_99171727	monoexon	STK24-001	1	ENSG00000102572	ENST00000397517	ENSE00003596350	2	-
chr13_99498178_99508285	multiexon	DOCK9-001	1	ENSG00000088387	ENST00000376460	ENSE00003611793	34	-	ENSG00000088387	ENST00000376460	ENSE00003646320	38	-
chr13_99500846_99508285	multiexon	DOCK9-001	1	ENSG00000088387	ENST00000376460	ENSE00003611793	34	-	ENSG00000088387	ENST00000376460	ENSE00003622646	37	-
chr13_99549742_99556960	multiexon	DOCK9-001	1	ENSG00000088387	ENST00000376460	ENSE00001692370	10	-	ENSG00000088387	ENST00000376460	ENSE00001759171	15	-
chr13_99573208_99575625	multiexon	DOCK9-001	1	ENSG00000088387	ENST00000376460	ENSE00001658439	5	-	ENSG00000088387	ENST00000376460	ENSE00001806091	7	-
chr13_99573208_99582511	multiexon	DOCK9-001	1	ENSG00000088387	ENST00000376460	ENSE00001656237	3	-	ENSG00000088387	ENST00000376460	ENSE00001806091	7	-
chr13_99890681_99896878	multiexon	UBAC2-002	2	ENSG00000134882	ENST00000403766	ENSE00003610485	2	+	ENSG00000134882	ENST00000403766	ENSE00003581436	4	+
chr13_99890681_99970323	multiexon	UBAC2-001	1	ENSG00000134882	ENST00000376440	ENSE00003472052	2	+	ENSG00000134882	ENST00000376440	ENSE00003501202	4	+
chr14_100551024_100563995	multiexon	EVL-001	1	ENSG00000196405	ENST00000392920	ENSE00003505548	2	+	ENSG00000196405	ENST00000392920	ENSE00003566998	3	+
chr14_100826891_100828258	multiexon	WARS-001	1	ENSG00000140105	ENST00000392882	ENSE00003700286	3	-	ENSG00000140105	ENST00000392882	ENSE00003691154	4	-
chr14_100934358_100950461	multiexon	WDR25-001	1	ENSG00000176473	ENST00000402312	ENSE00003517705	3	+	ENSG00000176473	ENST00000402312	ENSE00003673336	4	+
chr14_102468874_102469302	multiexon	DYNC1H1-001	1	ENSG00000197102	ENST00000360184	ENSE00000660416	22	+	ENSG00000197102	ENST00000360184	ENSE00000452675	23	+
chr14_102469129_102471020	multiexon	DYNC1H1-001	1	ENSG00000197102	ENST00000360184	ENSE00000452675	23	+	ENSG00000197102	ENST00000360184	ENSE00001153541	24	+
chr14_102486230_102489217	multiexon	DYNC1H1-001	1	ENSG00000197102	ENST00000360184	ENSE00001099815	42	+	ENSG00000197102	ENST00000360184	ENSE00003560378	43	+
chr14_102506573_102507010	multiexon	DYNC1H1-001	1	ENSG00000197102	ENST00000360184	ENSE00003660248	63	+	ENSG00000197102	ENST00000360184	ENSE00003665703	64	+
chr14_102659800_102661457	multiexon	WDR20-007	7	ENSG00000140153	ENST00000555879	ENSE00003630022	2	+	ENSG00000140153	ENST00000555879	ENSE00003498160	3	+
chr14_102661275_102664184	putativeexon	WDR20-008	8	ENSG00000140153	ENST00000557186	ENSE00003498160	2	+	ENSG00000140153	ENST00000557186	ENSE00002439036	4	+
chr14_102810158_102810726	putativeexon	CINP-002	2	ENSG00000100865	ENST00000559514	ENSE00002540814	6	-
chr14_103180760_103187714	multiexon	RCOR1-001	1	ENSG00000089902	ENST00000262241	ENSE00000660508	8	+	ENSG00000089902	ENST00000262241	ENSE00000660510	10	+
chr14_103296671_103342862	multiexon	TRAF3-005	5	ENSG00000131323	ENST00000392745	ENSE00001512975	2	+	ENSG00000131323	ENST00000392745	ENSE00000660515	6	+
chr14_103336522_103342862	multiexon	TRAF3-001	1	ENSG00000131323	ENST00000560371	ENSE00001026101	2	+	ENSG00000131323	ENST00000560371	ENSE00000660515	5	+
chr14_103449893_103452917	multiexon	CDC42BPB-001	1	ENSG00000198752	ENST00000361246	ENSE00000870535	6	-	ENSG00000198752	ENST00000361246	ENSE00001737877	7	-
chr14_103465902_103478525	multiexon	CDC42BPB-001	1	ENSG00000198752	ENST00000361246	ENSE00000660561	2	-	ENSG00000198752	ENST00000361246	ENSE00003460688	5	-
chr14_103470265_103478525	multiexon	CDC42BPB-001	1	ENSG00000198752	ENST00000361246	ENSE00000660561	2	-	ENSG00000198752	ENST00000361246	ENSE00003627041	4	-
chr14_103474809_103478525	multiexon	CDC42BPB-001	1	ENSG00000198752	ENST00000361246	ENSE00000660561	2	-	ENSG00000198752	ENST00000361246	ENSE00000660560	3	-
chr14_103865288_103871604	intronic	MARK3-001	1
chr14_103865288_103894777	intronic	MARK3-001	1
chr14_103871413_103894777	multiexon	MARK3-001	1	ENSG00000075413	ENST00000429436	ENSE00003486846	2	+	ENSG00000075413	ENST00000429436	ENSE00003602799	3	+
chr14_103894724_103923549	multiexon	MARK3-001	1	ENSG00000075413	ENST00000429436	ENSE00003602799	3	+	ENSG00000075413	ENST00000429436	ENSE00003628041	6	+
chr14_103894724_103928798	multiexon	MARK3-001	1	ENSG00000075413	ENST00000429436	ENSE00003602799	3	+	ENSG00000075413	ENST00000429436	ENSE00003608398	7	+
chr14_103915256_103923549	multiexon	MARK3-001	1	ENSG00000075413	ENST00000429436	ENSE00003676647	4	+	ENSG00000075413	ENST00000429436	ENSE00003628041	6	+
chr14_103918255_103928798	multiexon	MARK3-001	1	ENSG00000075413	ENST00000429436	ENSE00003685453	5	+	ENSG00000075413	ENST00000429436	ENSE00003608398	7	+
chr14_104037960_104053701	multiexon	APOPT1-001	1	ENSG00000256053	ENST00000409074	ENSE00003538462	2	+	ENSG00000256053	ENST00000409074	ENSE00003550976	4	+
chr14_104037960_104053701	multiexon	RP11-73M18.2-001	1	ENSG00000256500	ENST00000472726	ENSE00003498456	2	+	ENSG00000256500	ENST00000472726	ENSE00003594838	4	+
chr14_104120901_104121162	monoexon	KLC1-001	1	ENSG00000126214	ENST00000348520	ENSE00003543885	2	+
chr14_104120901_104121162	monoexon	RP11-73M18.2-001	1	ENSG00000256500	ENST00000472726	ENSE00003578940	5	+
chr14_104223987_104263855	multiexon	PPP1R13B-001	1	ENSG00000088808	ENST00000202556	ENSE00003598320	2	-	ENSG00000088808	ENST00000202556	ENSE00003607400	5	-
chr14_104245082_104263855	multiexon	PPP1R13B-001	1	ENSG00000088808	ENST00000202556	ENSE00003598320	2	-	ENSG00000088808	ENST00000202556	ENSE00003564884	4	-
chr14_104433046_104436958	multiexon	TDRD9-001	1	ENSG00000156414	ENST00000409874	ENSE00001661544	5	+	ENSG00000156414	ENST00000409874	ENSE00001697359	6	+
chr14_104624092_104633385	multiexon	KIF26A-001	1	ENSG00000066735	ENST00000315264	ENSE00001707890	3	+	ENSG00000066735	ENST00000315264	ENSE00001184801	4	+
chr14_105692406_105693097	multiexon	BRF1-001	1	ENSG00000185024	ENST00000392557	ENSE00001745955	4	-	ENSG00000185024	ENST00000392557	ENSE00001690016	6	-
chr14_105718844_105739231	multiexon	BRF1-002	2	ENSG00000185024	ENST00000546474	ENSE00003674854	3	-	ENSG00000185024	ENST00000546474	ENSE00001598886	5	-
chr14_105718844_105752713	multiexon	BRF1-002	2	ENSG00000185024	ENST00000546474	ENSE00003476339	2	-	ENSG00000185024	ENST00000546474	ENSE00001598886	5	-
chr14_105814830_105821514	multiexon	PACS2-001	1	ENSG00000179364	ENST00000458164	ENSE00003531766	2	+	ENSG00000179364	ENST00000458164	ENSE00001287264	4	+
chr14_20793698_20797532	putativeexon	CCNB1IP1-001	1	ENSG00000100814	ENST00000398169	ENSE00001531926	1	-	ENSG00000100814	ENST00000398169	ENSE00001532016	3	-
chr14_20863609_20864889	multiexon	TEP1-001	1	ENSG00000129566	ENST00000262715	ENSE00000652661	10	-	ENSG00000129566	ENST00000262715	ENSE00000652658	12	-
chr14_21464368_21464870	multiexon	METTL17-001	1	ENSG00000165792	ENST00000339374	ENSE00003663884	12	+	ENSG00000165792	ENST00000339374	ENSE00003601069	13	+
chr14_21698478_21702388	multiexon	HNRNPC-001	1	ENSG00000092199	ENST00000336053	ENSE00003524718	2	-	ENSG00000092199	ENST00000336053	ENSE00003657213	4	-
chr14_21825356_21829372	multiexon	SUPT16H-001	1	ENSG00000092201	ENST00000216297	ENSE00000653178	16	-	ENSG00000092201	ENST00000216297	ENSE00003650438	22	-
chr14_21971316_21972024	multiexon	METTL3-001	1	ENSG00000165819	ENST00000298717	ENSE00003621932	2	-	ENSG00000165819	ENST00000298717	ENSE00003582041	3	-
chr14_23375404_23380612	multiexon	RBM23-001	1	ENSG00000100461	ENST00000359890	ENSE00003561275	2	-	ENSG00000100461	ENST00000359890	ENSE00003667254	5	-
chr14_23395342_23396023	multiexon	PRMT5-003	3	ENSG00000100462	ENST00000324366	ENSE00003665575	5	-	ENSG00000100462	ENST00000324366	ENSE00003629689	7	-
chr14_23395342_23396869	multiexon	PRMT5-003	3	ENSG00000100462	ENST00000324366	ENSE00003506566	4	-	ENSG00000100462	ENST00000324366	ENSE00003629689	7	-
chr14_23419523_23421892	multiexon	HAUS4-002	2	ENSG00000092036	ENST00000555367	ENSE00003510008	3	-	ENSG00000092036	ENST00000555367	ENSE00003478168	5	-
chr14_23502577_23502883	monoexon	PSMB5-002	2	ENSG00000100804	ENST00000361611	ENSE00003535354	2	-
chr14_24735636_24737825	multiexon	RABGGTA-001	1	ENSG00000100949	ENST00000558376	ENSE00003565349	10	-	ENSG00000100949	ENST00000558376	ENSE00003473613	16	-
chr14_25443871_25446449	intronic	STXBP6-001	1
chr14_26595363_26596938	intronic	RP11-314P15.2-001	1
chr14_31050282_31062845	multiexon	G2E3-001	1	ENSG00000092140	ENST00000206595	ENSE00003622300	2	+	ENSG00000092140	ENST00000206595	ENSE00003657542	6	+
chr14_31067689_31071337	multiexon	G2E3-001	1	ENSG00000092140	ENST00000206595	ENSE00003590679	8	+	ENSG00000092140	ENST00000206595	ENSE00003603766	10	+
chr14_31097415_31107453	multiexon	SCFD1-006	6	ENSG00000092108	ENST00000458591	ENSE00003652065	2	+	ENSG00000092108	ENST00000458591	ENSE00003513100	5	+
chr14_31097415_31122794	multiexon	SCFD1-005	5	ENSG00000092108	ENST00000555259	ENSE00003652065	2	+	ENSG00000092108	ENST00000555259	ENSE00003658402	9	+
chr14_31103153_31107453	multiexon	SCFD1-002	2	ENSG00000092108	ENST00000484733	ENSE00003476277	3	+	ENSG00000092108	ENST00000484733	ENSE00003516676	5	+
chr14_31103153_31112611	multiexon	SCFD1-002	2	ENSG00000092108	ENST00000484733	ENSE00003476277	3	+	ENSG00000092108	ENST00000484733	ENSE00003685264	7	+
chr14_31103153_31122794	multiexon	SCFD1-002	2	ENSG00000092108	ENST00000484733	ENSE00003476277	3	+	ENSG00000092108	ENST00000484733	ENSE00003658402	10	+
chr14_31112522_31122794	multiexon	SCFD1-001	1	ENSG00000092108	ENST00000469043	ENSE00003548659	2	+	ENSG00000092108	ENST00000469043	ENSE00003481418	5	+
chr14_31139462_31144271	multiexon	SCFD1-002	2	ENSG00000092108	ENST00000484733	ENSE00003629348	11	+	ENSG00000092108	ENST00000484733	ENSE00003482218	14	+
chr14_31139462_31169464	multiexon	SCFD1-002	2	ENSG00000092108	ENST00000484733	ENSE00003629348	11	+	ENSG00000092108	ENST00000484733	ENSE00003469122	16	+
chr14_31185130_31204064	multiexon	SCFD1-002	2	ENSG00000092108	ENST00000484733	ENSE00003621819	20	+	ENSG00000092108	ENST00000484733	ENSE00003560773	24	+
chr14_31535332_31542179	multiexon	AP4S1-001	1	ENSG00000100478	ENST00000216366	ENSE00001357769	2	+	ENSG00000100478	ENST00000216366	ENSE00003632015	4	+
chr14_31581622_31583546	multiexon	HECTD1-001	1	ENSG00000092148	ENST00000553700	ENSE00003629539	31	-	ENSG00000092148	ENST00000553700	ENSE00003685204	35	-
chr14_31582310_31583546	multiexon	HECTD1-001	1	ENSG00000092148	ENST00000553700	ENSE00003629539	31	-	ENSG00000092148	ENST00000553700	ENSE00003614913	34	-
chr14_31605737_31626092	putativeexon	HECTD1-001	1	ENSG00000092148	ENST00000553700	ENSE00001492219	12	-	ENSG00000092148	ENST00000553700	ENSE00000654855	20	-
chr14_31637504_31638674	multiexon	HECTD1-001	1	ENSG00000092148	ENST00000553700	ENSE00001492224	9	-	ENSG00000092148	ENST00000553700	ENSE00001492222	10	-
chr14_31765115_31771725	multiexon	HEATR5A-001	1	ENSG00000129493	ENST00000543095	ENSE00001170354	33	-	ENSG00000129493	ENST00000543095	ENSE00001170348	34	-
chr14_31775938_31778388	multiexon	HEATR5A-001	1	ENSG00000129493	ENST00000543095	ENSE00001170380	29	-	ENSG00000129493	ENST00000543095	ENSE00000940440	31	-
chr14_31792771_31795548	multiexon	HEATR5A-001	1	ENSG00000129493	ENST00000543095	ENSE00001507351	23	-	ENSG00000129493	ENST00000543095	ENSE00001507350	24	-
chr14_31813102_31817113	multiexon	HEATR5A-001	1	ENSG00000129493	ENST00000543095	ENSE00003595269	19	-	ENSG00000129493	ENST00000543095	ENSE00003472021	21	-
chr14_31813102_31817113	multiexon	RP11-176H8.1-001	1	ENSG00000203546	ENST00000549185	ENSE00003558555	21	-	ENSG00000203546	ENST00000549185	ENSE00003487719	23	-
chr14_31818995_31833504	multiexon	HEATR5A-001	1	ENSG00000129493	ENST00000543095	ENSE00003597334	14	-	ENSG00000129493	ENST00000543095	ENSE00003629331	18	-
chr14_31818995_31833504	multiexon	RP11-176H8.1-001	1	ENSG00000203546	ENST00000549185	ENSE00003568330	16	-	ENSG00000203546	ENST00000549185	ENSE00003579747	20	-
chr14_31841016_31844174	multiexon	HEATR5A-001	1	ENSG00000129493	ENST00000543095	ENSE00003505536	12	-	ENSG00000129493	ENST00000543095	ENSE00003525966	13	-
chr14_31841016_31844174	multiexon	RP11-176H8.1-001	1	ENSG00000203546	ENST00000549185	ENSE00003546830	14	-	ENSG00000203546	ENST00000549185	ENSE00003598360	15	-
chr14_31849673_31856581	multiexon	HEATR5A-001	1	ENSG00000129493	ENST00000543095	ENSE00003628641	8	-	ENSG00000129493	ENST00000543095	ENSE00003508414	11	-
chr14_31849673_31856581	multiexon	RP11-176H8.1-001	1	ENSG00000203546	ENST00000549185	ENSE00003658848	10	-	ENSG00000203546	ENST00000549185	ENSE00003569113	13	-
chr14_32241022_32257079	intronic	NUBPL-001	1
chr14_32586346_32621734	multiexon	ARHGAP5-001	1	ENSG00000100852	ENST00000539826	ENSE00003620356	3	+	ENSG00000100852	ENST00000539826	ENSE00003689798	6	+
chr14_32902666_32903023	monoexon	AKAP6-001	1	ENSG00000151320	ENST00000280979	ENSE00003541701	2	+
chr14_34394824_34400421	putativeexon	EGLN3-001	1	ENSG00000129521	ENST00000250457	ENSE00001780608	2	-	ENSG00000129521	ENST00000250457	ENSE00001295363	5	-
chr14_35020920_35024118	intergenic
chr14_35036892_35037219	multiexon	SNX6-001	1	ENSG00000129515	ENST00000396526	ENSE00003530217	11	-	ENSG00000129515	ENST00000396526	ENSE00003624918	12	-
chr14_35044962_35078948	multiexon	SNX6-001	1	ENSG00000129515	ENST00000396526	ENSE00003476192	2	-	ENSG00000129515	ENST00000396526	ENSE00003514812	10	-
chr14_35276657_35331528	multiexon	BAZ1A-001	1	ENSG00000198604	ENST00000382422	ENSE00000889674	2	-	ENSG00000198604	ENST00000382422	ENSE00000889668	5	-
chr14_35295219_35331528	multiexon	BAZ1A-001	1	ENSG00000198604	ENST00000382422	ENSE00000889674	2	-	ENSG00000198604	ENST00000382422	ENSE00000889673	3	-
chr14_35331250_35331528	monoexon	BAZ1A-001	1	ENSG00000198604	ENST00000382422	ENSE00000889674	2	-
chr14_35438376_35441270	putativeexon	RP11-85K15.2-001	1	ENSG00000258704	ENST00000554945	ENSE00002449423	2	-	ENSG00000258704	ENST00000554945	ENSE00002527928	3	-
chr14_35487898_35488280	multiexon	SRP54-001	1	ENSG00000100883	ENST00000556994	ENSE00003540376	13	+	ENSG00000100883	ENST00000556994	ENSE00000655781	14	+
chr14_37709638_37717112	putativeexon	MIPOL1-008	8	ENSG00000151338	ENST00000554114	ENSE00002491983	1	+	ENSG00000151338	ENST00000554114	ENSE00003655554	3	+
chr14_37838722_37892154	multiexon	MIPOL1-001	1	ENSG00000151338	ENST00000327441	ENSE00003617061	11	+	ENSG00000151338	ENST00000327441	ENSE00003626399	12	+
chr14_37969113_37969343	monoexon	MIPOL1-001	1	ENSG00000151338	ENST00000327441	ENSE00003691119	13	+
chr14_39562391_39565343	multiexon	SEC23A-001	1	ENSG00000100934	ENST00000307712	ENSE00000889778	2	-	ENSG00000100934	ENST00000307712	ENSE00003550467	3	-
chr14_39565102_39565343	monoexon	SEC23A-001	1	ENSG00000100934	ENST00000307712	ENSE00000889778	2	-
chr14_39620950_39628754	multiexon	TRAPPC6B-001	1	ENSG00000182400	ENST00000347691	ENSE00001298290	2	-	ENSG00000182400	ENST00000347691	ENSE00003554729	4	-
chr14_39623415_39627606	multiexon	TRAPPC6B-002	2	ENSG00000182400	ENST00000330149	ENSE00003652865	3	-	ENSG00000182400	ENST00000330149	ENSE00003492679	4	-
chr14_39623415_39628754	multiexon	TRAPPC6B-002	2	ENSG00000182400	ENST00000330149	ENSE00001298290	2	-	ENSG00000182400	ENST00000330149	ENSE00003492679	4	-
chr14_39627489_39628754	multiexon	TRAPPC6B-001	1	ENSG00000182400	ENST00000347691	ENSE00001298290	2	-	ENSG00000182400	ENST00000347691	ENSE00003652865	3	-
chr14_39746138_39748741	multiexon	CTAGE5-001	1	ENSG00000150527	ENST00000341749	ENSE00003552077	2	+	ENSG00000150527	ENST00000341749	ENSE00003594544	4	+
chr14_39746138_39748741	multiexon	RP11-407N17.3-001	1	ENSG00000258941	ENST00000553728	ENSE00003660194	6	+	ENSG00000258941	ENST00000553728	ENSE00003577510	8	+
chr14_39746138_39764233	multiexon	CTAGE5-001	1	ENSG00000150527	ENST00000341749	ENSE00003552077	2	+	ENSG00000150527	ENST00000341749	ENSE00003491359	8	+
chr14_39746138_39764233	multiexon	RP11-407N17.3-001	1	ENSG00000258941	ENST00000553728	ENSE00003660194	6	+	ENSG00000258941	ENST00000553728	ENSE00003689076	12	+
chr14_39782544_39796226	multiexon	CTAGE5-001	1	ENSG00000150527	ENST00000341749	ENSE00003495828	14	+	ENSG00000150527	ENST00000341749	ENSE00003503064	20	+
chr14_39782544_39796226	multiexon	RP11-407N17.3-001	1	ENSG00000258941	ENST00000553728	ENSE00003528680	18	+	ENSG00000258941	ENST00000553728	ENSE00003493046	24	+
chr14_39815108_39818181	multiexon	CTAGE5-001	1	ENSG00000150527	ENST00000341749	ENSE00003558067	21	+	ENSG00000150527	ENST00000341749	ENSE00003537248	23	+
chr14_39815108_39818181	multiexon	RP11-407N17.3-001	1	ENSG00000258941	ENST00000553728	ENSE00003539751	25	+	ENSG00000258941	ENST00000553728	ENSE00003514726	27	+
chr14_40124049_40125012	intergenic
chr14_45475211_45495075	multiexon	FAM179B-001	1	ENSG00000198718	ENST00000361577	ENSE00003540071	5	+	ENSG00000198718	ENST00000361577	ENSE00003686041	8	+
chr14_45481178_45497532	multiexon	FAM179B-001	1	ENSG00000198718	ENST00000361577	ENSE00003582457	7	+	ENSG00000198718	ENST00000361577	ENSE00003606230	10	+
chr14_45618040_45628483	multiexon	FANCM-001	1	ENSG00000187790	ENST00000267430	ENSE00001092718	4	+	ENSG00000187790	ENST00000267430	ENSE00001343725	9	+
chr14_45623900_45628483	multiexon	FANCM-001	1	ENSG00000187790	ENST00000267430	ENSE00001343733	7	+	ENSG00000187790	ENST00000267430	ENSE00001343725	9	+
chr14_45705017_45706924	multiexon	MIS18BP1-001	1	ENSG00000129534	ENST00000310806	ENSE00001092767	5	-	ENSG00000129534	ENST00000310806	ENSE00000995480	6	-
chr14_45715946_45716580	monoexon	MIS18BP1-001	1	ENSG00000129534	ENST00000310806	ENSE00001333739	2	-
chr14_50074118_50074839	monoexon	LRR1-001	1	ENSG00000165501	ENST00000298288	ENSE00003629017	3	+
chr14_50120708_50122529	putativeexon	POLE2-001	1	ENSG00000100479	ENST00000216367	ENSE00003618568	11	-	ENSG00000100479	ENST00000216367	ENSE00003533273	15	-
chr14_50130033_50133131	multiexon	POLE2-001	1	ENSG00000100479	ENST00000216367	ENSE00003497125	7	-	ENSG00000100479	ENST00000216367	ENSE00003646275	10	-
chr14_50130033_50141145	multiexon	POLE2-001	1	ENSG00000100479	ENST00000216367	ENSE00000940761	4	-	ENSG00000100479	ENST00000216367	ENSE00003646275	10	-
chr14_50131344_50141145	multiexon	POLE2-001	1	ENSG00000100479	ENST00000216367	ENSE00000940761	4	-	ENSG00000100479	ENST00000216367	ENSE00001507517	9	-
chr14_50136242_50141145	multiexon	POLE2-001	1	ENSG00000100479	ENST00000216367	ENSE00000940761	4	-	ENSG00000100479	ENST00000216367	ENSE00003668663	6	-
chr14_50615003_50616948	intronic	SOS2-001	1
chr14_50616726_50616948	monoexon	SOS2-001	1	ENSG00000100485	ENST00000216373	ENSE00000656819	14	-
chr14_50616726_50619891	multiexon	SOS2-001	1	ENSG00000100485	ENST00000216373	ENSE00000656821	13	-	ENSG00000100485	ENST00000216373	ENSE00000656819	14	-
chr14_50619788_50625364	multiexon	SOS2-001	1	ENSG00000100485	ENST00000216373	ENSE00003642105	11	-	ENSG00000100485	ENST00000216373	ENSE00000656821	13	-
chr14_50647290_50655418	multiexon	SOS2-001	1	ENSG00000100485	ENST00000216373	ENSE00000656830	5	-	ENSG00000100485	ENST00000216373	ENSE00000656827	7	-
chr14_50666409_50671127	multiexon	SOS2-001	1	ENSG00000100485	ENST00000216373	ENSE00003493295	2	-	ENSG00000100485	ENST00000216373	ENSE00003482357	4	-
chr14_50732076_50760964	multiexon	L2HGDH-001	1	ENSG00000087299	ENST00000267436	ENSE00000656856	4	-	ENSG00000087299	ENST00000267436	ENSE00001093853	9	-
chr14_50933301_50943024	multiexon	MAP4K5-001	1	ENSG00000012983	ENST00000013125	ENSE00003530283	7	-	ENSG00000012983	ENST00000013125	ENSE00003667297	11	-
chr14_50941795_50952912	multiexon	MAP4K5-001	1	ENSG00000012983	ENST00000013125	ENSE00003565466	4	-	ENSG00000012983	ENST00000013125	ENSE00003533716	9	-
chr14_50941795_50971575	multiexon	MAP4K5-001	1	ENSG00000012983	ENST00000013125	ENSE00003459472	3	-	ENSG00000012983	ENST00000013125	ENSE00003533716	9	-
chr14_51101932_51111732	putativeexon	SAV1-001	1	ENSG00000151748	ENST00000324679	ENSE00001001539	3	-	ENSG00000151748	ENST00000324679	ENSE00001246821	5	-
chr14_51107468_51111732	multiexon	SAV1-001	1	ENSG00000151748	ENST00000324679	ENSE00001001539	3	-	ENSG00000151748	ENST00000324679	ENSE00001001537	4	-
chr14_51259430_51273536	multiexon	NIN-003	3	ENSG00000100503	ENST00000476352	ENSE00003305744	4	-	ENSG00000100503	ENST00000476352	ENSE00003600094	5	-
chr14_51259430_51288795	multiexon	NIN-003	3	ENSG00000100503	ENST00000476352	ENSE00003667024	3	-	ENSG00000100503	ENST00000476352	ENSE00003600094	5	-
chr14_51710574_51713938	multiexon	TMX1-001	1	ENSG00000139921	ENST00000457354	ENSE00000940751	2	+	ENSG00000139921	ENST00000457354	ENSE00003547421	4	+
chr14_51710574_51716483	multiexon	TMX1-001	1	ENSG00000139921	ENST00000457354	ENSE00000940751	2	+	ENSG00000139921	ENST00000457354	ENSE00003655599	7	+
chr14_53327059_53340944	multiexon	FERMT2-001	1	ENSG00000073712	ENST00000341590	ENSE00000657505	9	-	ENSG00000073712	ENST00000341590	ENSE00003499444	13	-
chr14_53539315_53570574	multiexon	DDHD1-001	1	ENSG00000100523	ENST00000357758	ENSE00003676572	2	-	ENSG00000100523	ENST00000357758	ENSE00003620868	6	-
chr14_53558503_53570574	multiexon	DDHD1-001	1	ENSG00000100523	ENST00000357758	ENSE00003676572	2	-	ENSG00000100523	ENST00000357758	ENSE00001245384	4	-
chr14_54875463_54878424	multiexon	CDKN3-001	1	ENSG00000100526	ENST00000335183	ENSE00003662713	4	+	ENSG00000100526	ENST00000335183	ENSE00003571661	5	+
chr14_54875463_54882648	multiexon	CDKN3-001	1	ENSG00000100526	ENST00000335183	ENSE00003662713	4	+	ENSG00000100526	ENST00000335183	ENSE00003561728	6	+
chr14_55071090_55076343	intronic	SAMD4A-001	1
chr14_55168780_55169298	monoexon	SAMD4A-001	1	ENSG00000020577	ENST00000251091	ENSE00003564370	2	+
chr14_55433193_55434112	multiexon	WDHD1-001	1	ENSG00000198554	ENST00000360586	ENSE00003528035	17	-	ENSG00000198554	ENST00000360586	ENSE00003609768	18	-
chr14_55462321_55467710	multiexon	WDHD1-001	1	ENSG00000198554	ENST00000360586	ENSE00002585987	9	-	ENSG00000198554	ENST00000360586	ENSE00000657694	11	-
chr14_55647931_55650471	multiexon	DLGAP5-001	1	ENSG00000126787	ENST00000247191	ENSE00001093679	3	-	ENSG00000126787	ENST00000247191	ENSE00001093673	5	-
chr14_56114743_56115588	multiexon	KTN1-001	1	ENSG00000126777	ENST00000459737	ENSE00001304035	21	+	ENSG00000126777	ENST00000459737	ENSE00001327894	22	+
chr14_56746394_56757174	multiexon	PELI2-001	1	ENSG00000139946	ENST00000267460	ENSE00003469520	3	+	ENSG00000139946	ENST00000267460	ENSE00001093824	5	+
chr14_57704056_57711077	multiexon	EXOC5-001	1	ENSG00000070367	ENST00000413566	ENSE00003636328	4	-	ENSG00000070367	ENST00000413566	ENSE00003682033	6	-
chr14_57740962_57741607	monoexon	AP5M1-001	1	ENSG00000053770	ENST00000261558	ENSE00001094514	2	+
chr14_58718837_58724716	multiexon	PSMA3-001	1	ENSG00000100567	ENST00000216455	ENSE00003470996	3	+	ENSG00000100567	ENST00000216455	ENSE00003688321	5	+
chr14_58753358_58758425	intronic	RP11-349A22.5-002	2
chr14_59923156_59927891	multiexon	GPR135-001	1	ENSG00000181619	ENST00000481661	ENSE00003513066	3	-	ENSG00000181619	ENST00000481661	ENSE00001520647	5	-
chr14_59923156_59946069	intergenic	GPR135-001	1
chr14_60582437_60592541	multiexon	PCNXL4-001	1	ENSG00000126773	ENST00000406949	ENSE00003692727	4	+	ENSG00000126773	ENST00000406949	ENSE00003607083	9	+
chr14_61275043_61285565	multiexon	MNAT1-001	1	ENSG00000020426	ENST00000261245	ENSE00003533987	4	+	ENSG00000020426	ENST00000261245	ENSE00003538471	6	+
chr14_61275043_61346553	multiexon	MNAT1-001	1	ENSG00000020426	ENST00000261245	ENSE00003533987	4	+	ENSG00000020426	ENST00000261245	ENSE00003506378	7	+
chr14_61278705_61346553	multiexon	MNAT1-001	1	ENSG00000020426	ENST00000261245	ENSE00003554119	5	+	ENSG00000020426	ENST00000261245	ENSE00003506378	7	+
chr14_61285440_61346553	multiexon	MNAT1-001	1	ENSG00000020426	ENST00000261245	ENSE00003538471	6	+	ENSG00000020426	ENST00000261245	ENSE00003506378	7	+
chr14_61449226_61497241	multiexon	SLC38A6-001	1	ENSG00000139974	ENST00000267488	ENSE00003510687	2	+	ENSG00000139974	ENST00000267488	ENSE00003677323	6	+
chr14_61482622_61512885	multiexon	SLC38A6-001	1	ENSG00000139974	ENST00000267488	ENSE00003692744	4	+	ENSG00000139974	ENST00000267488	ENSE00003563154	12	+
chr14_61497163_61512885	multiexon	SLC38A6-001	1	ENSG00000139974	ENST00000267488	ENSE00003677323	6	+	ENSG00000139974	ENST00000267488	ENSE00003563154	12	+
chr14_61503777_61518853	multiexon	SLC38A6-001	1	ENSG00000139974	ENST00000267488	ENSE00003597564	7	+	ENSG00000139974	ENST00000267488	ENSE00003535277	15	+
chr14_61509865_61512885	multiexon	SLC38A6-001	1	ENSG00000139974	ENST00000267488	ENSE00003639340	9	+	ENSG00000139974	ENST00000267488	ENSE00003563154	12	+
chr14_62187097_62188541	multiexon	HIF1A-003	3	ENSG00000100644	ENST00000394997	ENSE00003552462	2	+	ENSG00000100644	ENST00000394997	ENSE00003533403	4	+
chr14_62187100_62188541	multiexon	HIF1A-001	1	ENSG00000100644	ENST00000337138	ENSE00003592584	2	+	ENSG00000100644	ENST00000337138	ENSE00003533403	4	+
chr14_62188227_62188541	multiexon	HIF1A-001	1	ENSG00000100644	ENST00000337138	ENSE00003474252	3	+	ENSG00000100644	ENST00000337138	ENSE00003533403	4	+
chr14_62193424_62194373	multiexon	HIF1A-001	1	ENSG00000100644	ENST00000337138	ENSE00003673401	5	+	ENSG00000100644	ENST00000337138	ENSE00000658284	6	+
chr14_64568650_64574325	multiexon	SYNE2-001	1	ENSG00000054654	ENST00000344113	ENSE00001619167	64	+	ENSG00000054654	ENST00000344113	ENSE00001603647	65	+
chr14_64908772_64915035	multiexon	MTHFD1-002	2	ENSG00000100714	ENST00000545908	ENSE00003584908	20	+	ENSG00000100714	ENST00000545908	ENSE00003687807	23	+
chr14_64914935_64916340	multiexon	MTHFD1-002	2	ENSG00000100714	ENST00000545908	ENSE00003687807	23	+	ENSG00000100714	ENST00000545908	ENSE00003597432	24	+
chr14_65922339_65924925	intronic	FUT8-001	1
chr14_65922339_66028484	multiexon	FUT8-001	1	ENSG00000033170	ENST00000360689	ENSE00001373882	2	+	ENSG00000033170	ENST00000360689	ENSE00001383814	3	+
chr14_66028055_66028484	monoexon	FUT8-001	1	ENSG00000033170	ENST00000360689	ENSE00001383814	3	+
chr14_66096210_66136198	multiexon	FUT8-001	1	ENSG00000033170	ENST00000360689	ENSE00003528423	6	+	ENSG00000033170	ENST00000360689	ENSE00003535052	7	+
chr14_66188493_66191041	multiexon	FUT8-001	1	ENSG00000033170	ENST00000360689	ENSE00000658486	8	+	ENSG00000033170	ENST00000360689	ENSE00000658485	9	+
chr14_67431908_67525503	multiexon	GPHN-003	3	ENSG00000171723	ENST00000315266	ENSE00003615648	8	+	ENSG00000171723	ENST00000315266	ENSE00003489542	10	+
chr14_67812485_67814170	multiexon	ATP6V1D-001	1	ENSG00000100554	ENST00000216442	ENSE00003467506	5	-	ENSG00000100554	ENST00000216442	ENSE00003646261	6	-
chr14_68151732_68157138	multiexon	RDH11-001	1	ENSG00000072042	ENST00000381346	ENSE00003654169	5	-	ENSG00000072042	ENST00000381346	ENSE00003499956	6	-
chr14_68228083_68229536	multiexon	ZFYVE26-001	1	ENSG00000072121	ENST00000347230	ENSE00003546026	33	-	ENSG00000072121	ENST00000347230	ENSE00003685807	35	-
chr14_68290259_68301913	multiexon	RAD51B-001	1	ENSG00000182185	ENST00000487861	ENSE00001518458	2	+	ENSG00000182185	ENST00000487861	ENSE00001313228	4	+
chr14_68290259_68353921	multiexon	RAD51B-001	1	ENSG00000182185	ENST00000487861	ENSE00001518458	2	+	ENSG00000182185	ENST00000487861	ENSE00003579281	7	+
chr14_69369194_69387842	multiexon	ACTN1-001	1	ENSG00000072110	ENST00000193403	ENSE00003686136	3	-	ENSG00000072110	ENST00000193403	ENSE00003690562	8	-
chr14_69387723_69392389	multiexon	ACTN1-001	1	ENSG00000072110	ENST00000193403	ENSE00003672428	2	-	ENSG00000072110	ENST00000193403	ENSE00003686136	3	-
chr14_69583083_69589077	multiexon	DCAF5-001	1	ENSG00000139990	ENST00000341516	ENSE00003631175	2	-	ENSG00000139990	ENST00000341516	ENSE00003689382	5	-
chr14_69588934_69616220	multiexon	DCAF5-006	6	ENSG00000139990	ENST00000553943	ENSE00002507184	2	-	ENSG00000139990	ENST00000553943	ENSE00003555508	3	-
chr14_69670634_69676918	multiexon	EXD2-001	1	ENSG00000081177	ENST00000409014	ENSE00001535336	2	+	ENSG00000081177	ENST00000409014	ENSE00001617320	4	+
chr14_69695533_69697315	multiexon	EXD2-001	1	ENSG00000081177	ENST00000409014	ENSE00003543852	5	+	ENSG00000081177	ENST00000409014	ENSE00003528397	6	+
chr14_69908549_69908983	multiexon	SLC39A9-002	2	ENSG00000029364	ENST00000556125	ENSE00002293977	3	+	ENSG00000029364	ENST00000556125	ENSE00003547643	4	+
chr14_69908786_69922583	multiexon	SLC39A9-003	3	ENSG00000029364	ENST00000555245	ENSE00003547643	3	+	ENSG00000029364	ENST00000555245	ENSE00003681585	6	+
chr14_69919958_69922583	multiexon	SLC39A9-003	3	ENSG00000029364	ENST00000555245	ENSE00003512264	4	+	ENSG00000029364	ENST00000555245	ENSE00003681585	6	+
chr14_70442432_70461197	multiexon	SMOC1-001	1	ENSG00000198732	ENST00000361956	ENSE00003564364	4	+	ENSG00000198732	ENST00000361956	ENSE00000911684	7	+
chr14_70477471_70490164	multiexon	SMOC1-001	1	ENSG00000198732	ENST00000361956	ENSE00003480376	8	+	ENSG00000198732	ENST00000361956	ENSE00001167484	11	+
chr14_71209068_71209308	monoexon	MAP3K9-001	1	ENSG00000006432	ENST00000554752	ENSE00001229326	6	-
chr14_71215546_71216798	multiexon	MAP3K9-001	1	ENSG00000006432	ENST00000554752	ENSE00001612964	4	-	ENSG00000006432	ENST00000554752	ENSE00000658868	5	-
chr14_71492834_71502874	multiexon	PCNX-001	1	ENSG00000100731	ENST00000304743	ENSE00001784858	14	+	ENSG00000100731	ENST00000304743	ENSE00001621812	19	+
chr14_71511850_71524441	multiexon	PCNX-001	1	ENSG00000100731	ENST00000304743	ENSE00001649294	20	+	ENSG00000100731	ENST00000304743	ENSE00003522295	26	+
chr14_71540262_71543136	multiexon	PCNX-001	1	ENSG00000100731	ENST00000304743	ENSE00001714212	27	+	ENSG00000100731	ENST00000304743	ENSE00001739259	28	+
chr14_71867511_71884913	multiexon	SIPA1L1-009	9	ENSG00000197555	ENST00000554126	ENSE00002435063	3	+	ENSG00000197555	ENST00000554126	ENSE00002476722	5	+
chr14_71880665_71884913	multiexon	SIPA1L1-009	9	ENSG00000197555	ENST00000554126	ENSE00002442217	4	+	ENSG00000197555	ENST00000554126	ENSE00002476722	5	+
chr14_71880665_71933964	intronic	SIPA1L1-008	8
chr14_71880665_71979562	multiexon	SIPA1L1-008	8	ENSG00000197555	ENST00000555989	ENSE00002442217	3	+	ENSG00000197555	ENST00000555989	ENSE00002449640	5	+
chr14_71880665_71996087	multiexon	SIPA1L1-009	9	ENSG00000197555	ENST00000554126	ENSE00002442217	4	+	ENSG00000197555	ENST00000554126	ENSE00002468135	8	+
chr14_71880665_72043304	multiexon	SIPA1L1-008	8	ENSG00000197555	ENST00000555989	ENSE00002442217	3	+	ENSG00000197555	ENST00000555989	ENSE00002451178	6	+
chr14_71933764_71996087	intronic	SIPA1L1-002	2
chr14_71970329_71996087	intronic	SIPA1L1-002	2
chr14_73459851_73460065	monoexon	ZFYVE1-001	1	ENSG00000165861	ENST00000556143	ENSE00001654948	4	-
chr14_73550202_73554869	multiexon	RBM25-001	1	ENSG00000119707	ENST00000261973	ENSE00003684519	5	+	ENSG00000119707	ENST00000261973	ENSE00003544212	6	+
chr14_73614503_73614802	putativeexon	PSEN1-001	1	ENSG00000080815	ENST00000324501	ENSE00001343124	2	+	ENSG00000080815	ENST00000324501	ENSE00001343119	3	+
chr14_73614503_73614814	multiexon	PSEN1-001	1	ENSG00000080815	ENST00000324501	ENSE00001343124	2	+	ENSG00000080815	ENST00000324501	ENSE00001343119	3	+
chr14_73614503_73640415	multiexon	PSEN1-001	1	ENSG00000080815	ENST00000324501	ENSE00001343124	2	+	ENSG00000080815	ENST00000324501	ENSE00003610263	5	+
chr14_73614503_73664837	multiexon	PSEN1-001	1	ENSG00000080815	ENST00000324501	ENSE00001343124	2	+	ENSG00000080815	ENST00000324501	ENSE00000808001	8	+
chr14_74203701_74204000	monoexon	ELMSAN1-001	1	ENSG00000156030	ENST00000394071	ENSE00001366094	3	-
chr14_74358730_74376133	multiexon	RP5-1021I20.4-001	1	ENSG00000258653	ENST00000556551	ENSE00003652058	10	+	ENSG00000258653	ENST00000556551	ENSE00003631487	17	+
chr14_74358730_74376133	multiexon	ZNF410-001	1	ENSG00000119725	ENST00000555044	ENSE00003600680	2	+	ENSG00000119725	ENST00000555044	ENSE00003667608	8	+
chr14_74370663_74376133	multiexon	RP5-1021I20.4-001	1	ENSG00000258653	ENST00000556551	ENSE00003542648	15	+	ENSG00000258653	ENST00000556551	ENSE00003631487	17	+
chr14_74370663_74376133	multiexon	ZNF410-001	1	ENSG00000119725	ENST00000555044	ENSE00003466856	6	+	ENSG00000119725	ENST00000555044	ENSE00003667608	8	+
chr14_74557935_74567941	multiexon	LIN52-001	1	ENSG00000205659	ENST00000555028	ENSE00003586238	2	+	ENSG00000205659	ENST00000555028	ENSE00003533748	5	+
chr14_74981309_74983644	intronic	LTBP2-001	1
chr14_75016566_75022396	multiexon	LTBP2-001	1	ENSG00000119681	ENST00000261978	ENSE00000808196	4	-	ENSG00000119681	ENST00000261978	ENSE00003543656	8	-
chr14_75136352_75138186	multiexon	AREL1-001	1	ENSG00000119682	ENST00000356357	ENSE00003616587	12	-	ENSG00000119682	ENST00000356357	ENSE00003578500	15	-
chr14_75506614_75509180	multiexon	MLH3-001	1	ENSG00000119684	ENST00000238662	ENSE00003595942	3	-	ENSG00000119684	ENST00000238662	ENSE00003488554	5	-
chr14_75576388_75577074	multiexon	NEK9-001	1	ENSG00000119638	ENST00000238616	ENSE00003649189	9	-	ENSG00000119638	ENST00000238616	ENSE00003468937	10	-
chr14_75576388_75585638	multiexon	NEK9-001	1	ENSG00000119638	ENST00000238616	ENSE00003640678	5	-	ENSG00000119638	ENST00000238616	ENSE00003468937	10	-
chr14_76173361_76187046	multiexon	TTLL5-001	1	ENSG00000119685	ENST00000298832	ENSE00003621753	8	+	ENSG00000119685	ENST00000298832	ENSE00003568672	12	+
chr14_76184204_76187046	multiexon	TTLL5-001	1	ENSG00000119685	ENST00000298832	ENSE00001730527	10	+	ENSG00000119685	ENST00000298832	ENSE00003568672	12	+
chr14_76198681_76201632	multiexon	TTLL5-001	1	ENSG00000119685	ENST00000298832	ENSE00003670952	13	+	ENSG00000119685	ENST00000298832	ENSE00003561207	15	+
chr14_76330010_76368567	multiexon	TTLL5-001	1	ENSG00000119685	ENST00000298832	ENSE00000808419	29	+	ENSG00000119685	ENST00000298832	ENSE00003525637	31	+
chr14_76633006_76644385	putativeexon	GPATCH2L-001	1	ENSG00000089916	ENST00000554125	ENSE00003641582	3	+	ENSG00000089916	ENST00000554125	ENSE00002452087	6	+
chr14_76633006_76647192	multiexon	GPATCH2L-003	3	ENSG00000089916	ENST00000261530	ENSE00003686420	3	+	ENSG00000089916	ENST00000261530	ENSE00003639267	8	+
chr14_76633006_76662315	multiexon	GPATCH2L-003	3	ENSG00000089916	ENST00000261530	ENSE00003686420	3	+	ENSG00000089916	ENST00000261530	ENSE00003564900	9	+
chr14_76638186_76647192	multiexon	GPATCH2L-003	3	ENSG00000089916	ENST00000261530	ENSE00003617322	4	+	ENSG00000089916	ENST00000261530	ENSE00003639267	8	+
chr14_76642966_76662315	multiexon	GPATCH2L-003	3	ENSG00000089916	ENST00000261530	ENSE00003642677	6	+	ENSG00000089916	ENST00000261530	ENSE00003564900	9	+
chr14_77930941_77932010	multiexon	AHSA1-001	1	ENSG00000100591	ENST00000216479	ENSE00000659332	5	+	ENSG00000100591	ENST00000216479	ENSE00003494699	6	+
chr14_78043110_78045452	multiexon	SPTLC2-001	1	ENSG00000100596	ENST00000216484	ENSE00000659360	3	-	ENSG00000100596	ENST00000216484	ENSE00000659358	4	-
chr14_80944597_80997230	putativeexon	CEP128-006	6	ENSG00000100629	ENST00000554502	ENSE00000659433	11	-	ENSG00000100629	ENST00000554502	ENSE00002467743	15	-
chr14_80963812_80997230	putativeexon	CEP128-001	1	ENSG00000100629	ENST00000555265	ENSE00000659433	22	-	ENSG00000100629	ENST00000555265	ENSE00002510495	25	-
chr14_80971255_80997230	multiexon	CEP128-001	1	ENSG00000100629	ENST00000555265	ENSE00000659433	22	-	ENSG00000100629	ENST00000555265	ENSE00003688644	24	-
chr14_81329101_81366373	multiexon	CEP128-001	1	ENSG00000100629	ENST00000555265	ENSE00001724444	7	-	ENSG00000100629	ENST00000555265	ENSE00001653087	9	-
chr14_81329101_81372425	multiexon	CEP128-001	1	ENSG00000100629	ENST00000555265	ENSE00001671034	5	-	ENSG00000100629	ENST00000555265	ENSE00001653087	9	-
chr14_81362062_81366373	multiexon	CEP128-001	1	ENSG00000100629	ENST00000555265	ENSE00001724444	7	-	ENSG00000100629	ENST00000555265	ENSE00001725949	8	-
chr14_81362062_81372425	multiexon	CEP128-001	1	ENSG00000100629	ENST00000555265	ENSE00001671034	5	-	ENSG00000100629	ENST00000555265	ENSE00001725949	8	-
chr14_81380666_81382906	multiexon	CEP128-001	1	ENSG00000100629	ENST00000555265	ENSE00003508511	3	-	ENSG00000100629	ENST00000555265	ENSE00003504666	4	-
chr14_84112888_84132553	intergenic
chr14_89041037_89044484	multiexon	ZC3H14-001	1	ENSG00000100722	ENST00000251038	ENSE00003616335	7	+	ENSG00000100722	ENST00000251038	ENSE00003476244	9	+
chr14_89093182_89110855	multiexon	EML5-001	1	ENSG00000165521	ENST00000554922	ENSE00003666127	30	-	ENSG00000165521	ENST00000554922	ENSE00003609094	35	-
chr14_89178615_89181539	multiexon	EML5-001	1	ENSG00000165521	ENST00000554922	ENSE00001634304	9	-	ENSG00000165521	ENST00000554922	ENSE00001657538	10	-
chr14_89192885_89212627	multiexon	EML5-001	1	ENSG00000165521	ENST00000554922	ENSE00001716802	3	-	ENSG00000165521	ENST00000554922	ENSE00001666652	8	-
chr14_89192885_89221015	multiexon	EML5-001	1	ENSG00000165521	ENST00000554922	ENSE00001747834	2	-	ENSG00000165521	ENST00000554922	ENSE00001666652	8	-
chr14_90390857_90398971	putativeexon	EFCAB11-002	2	ENSG00000140025	ENST00000538485	ENSE00003591472	4	-	ENSG00000140025	ENST00000538485	ENSE00002301031	6	-
chr14_90397885_90398971	multiexon	EFCAB11-001	1	ENSG00000140025	ENST00000316738	ENSE00003591472	4	-	ENSG00000140025	ENST00000316738	ENSE00003561054	5	-
chr14_91409422_91413894	multiexon	RPS6KA5-001	1	ENSG00000100784	ENST00000261991	ENSE00000659690	4	-	ENSG00000100784	ENST00000261991	ENSE00003501897	5	-
chr14_91409422_91467503	multiexon	RPS6KA5-001	1	ENSG00000100784	ENST00000261991	ENSE00003546891	2	-	ENSG00000100784	ENST00000261991	ENSE00003501897	5	-
chr14_91444650_91467503	multiexon	RPS6KA5-001	1	ENSG00000100784	ENST00000261991	ENSE00003546891	2	-	ENSG00000100784	ENST00000261991	ENSE00003564120	3	-
chr14_91655254_91666249	multiexon	C14orf159-001	1	ENSG00000133943	ENST00000256324	ENSE00003496282	9	+	ENSG00000133943	ENST00000256324	ENSE00003667566	11	+
chr14_91947920_91952074	multiexon	SMEK1-001	1	ENSG00000100796	ENST00000554684	ENSE00003491581	3	-	ENSG00000100796	ENST00000554684	ENSE00000808650	4	-
chr14_91947920_91957146	multiexon	SMEK1-001	1	ENSG00000100796	ENST00000554684	ENSE00001758079	2	-	ENSG00000100796	ENST00000554684	ENSE00000808650	4	-
chr14_92559596_92562481	multiexon	ATXN3-001	1	ENSG00000066427	ENST00000393287	ENSE00003649810	3	-	ENSG00000066427	ENST00000393287	ENSE00003477115	5	-
chr14_92559596_92563182	multiexon	ATXN3-001	1	ENSG00000066427	ENST00000393287	ENSE00003646843	2	-	ENSG00000066427	ENST00000393287	ENSE00003477115	5	-
chr14_92562437_92563182	multiexon	ATXN3-001	1	ENSG00000066427	ENST00000393287	ENSE00003646843	2	-	ENSG00000066427	ENST00000393287	ENSE00003649810	3	-
chr14_92592466_92609638	multiexon	CPSF2-001	1	ENSG00000165934	ENST00000298875	ENSE00001332498	2	+	ENSG00000165934	ENST00000298875	ENSE00001098233	9	+
chr14_93412676_93460342	multiexon	ITPK1-001	1	ENSG00000100605	ENST00000267615	ENSE00003469761	5	-	ENSG00000100605	ENST00000267615	ENSE00003460376	10	-
chr14_93460225_93483146	multiexon	ITPK1-001	1	ENSG00000100605	ENST00000267615	ENSE00003583401	4	-	ENSG00000100605	ENST00000267615	ENSE00003469761	5	-
chr14_93730131_93730339	monoexon	BTBD7-001	1	ENSG00000011114	ENST00000334746	ENSE00003496629	4	-
chr14_93760204_93761283	monoexon	BTBD7-001	1	ENSG00000011114	ENST00000334746	ENSE00001596176	3	-
chr14_93760204_93762503	multiexon	BTBD7-001	1	ENSG00000011114	ENST00000334746	ENSE00002311238	2	-	ENSG00000011114	ENST00000334746	ENSE00001596176	3	-
chr14_95606996_95608085	multiexon	DICER1-002	2	ENSG00000100697	ENST00000531162	ENSE00002151437	2	-	ENSG00000100697	ENST00000531162	ENSE00001514081	3	-
chr14_97026986_97031551	putativeexon	PAPOLA-001	1	ENSG00000090060	ENST00000216277	ENSE00003504345	20	+	ENSG00000090060	ENST00000216277	ENSE00001375853	22	+
chr14_97299804_97304154	multiexon	VRK1-001	1	ENSG00000100749	ENST00000216639	ENSE00003629800	2	+	ENSG00000100749	ENST00000216639	ENSE00003610936	3	+
chr14_97299804_97313681	multiexon	VRK1-001	1	ENSG00000100749	ENST00000216639	ENSE00003629800	2	+	ENSG00000100749	ENST00000216639	ENSE00003484527	5	+
chr14_97299804_97327072	multiexon	VRK1-001	1	ENSG00000100749	ENST00000216639	ENSE00003629800	2	+	ENSG00000100749	ENST00000216639	ENSE00003656903	11	+
chr14_97312432_97327072	multiexon	VRK1-001	1	ENSG00000100749	ENST00000216639	ENSE00003513172	4	+	ENSG00000100749	ENST00000216639	ENSE00003656903	11	+
chr14_97409854_97411719	intergenic	AL133168.3-001	1
chr14_99723808_99724173	putativeexon	BCL11B-001	1	ENSG00000127152	ENST00000357195	ENSE00000870344	2	-
chr14_99723808_99724176	monoexon	BCL11B-001	1	ENSG00000127152	ENST00000357195	ENSE00000870344	2	-
chr14_99924616_99932150	multiexon	SETD3-001	1	ENSG00000183576	ENST00000331768	ENSE00003479105	2	-	ENSG00000183576	ENST00000331768	ENSE00003480744	6	-
chr15_100692817_100695525	multiexon	ADAMTS17-001	1	ENSG00000140470	ENST00000268070	ENSE00003557817	9	-	ENSG00000140470	ENST00000268070	ENSE00003472381	10	-
chr15_100692817_100739628	multiexon	ADAMTS17-001	1	ENSG00000140470	ENST00000268070	ENSE00003501185	8	-	ENSG00000140470	ENST00000268070	ENSE00003472381	10	-
chr15_100692817_100871259	multiexon	ADAMTS17-001	1	ENSG00000140470	ENST00000268070	ENSE00003662605	3	-	ENSG00000140470	ENST00000268070	ENSE00003472381	10	-
chr15_100739523_100871259	multiexon	ADAMTS17-001	1	ENSG00000140470	ENST00000268070	ENSE00003662605	3	-	ENSG00000140470	ENST00000268070	ENSE00003501185	8	-
chr15_100794341_100871259	multiexon	ADAMTS17-001	1	ENSG00000140470	ENST00000268070	ENSE00003662605	3	-	ENSG00000140470	ENST00000268070	ENSE00003506532	7	-
chr15_100801684_100871259	multiexon	ADAMTS17-001	1	ENSG00000140470	ENST00000268070	ENSE00003662605	3	-	ENSG00000140470	ENST00000268070	ENSE00003596046	6	-
chr15_100821434_100871259	multiexon	ADAMTS17-001	1	ENSG00000140470	ENST00000268070	ENSE00003662605	3	-	ENSG00000140470	ENST00000268070	ENSE00003572700	4	-
chr15_100867581_100871259	intronic	ADAMTS17-001	1
chr15_100871094_100874385	intronic	ADAMTS17-001	1
chr15_101149912_101152632	multiexon	ASB7-001	1	ENSG00000183475	ENST00000332783	ENSE00001300879	3	+	ENSG00000183475	ENST00000332783	ENSE00001368215	4	+
chr15_101775287_101775782	monoexon	CHSY1-001	1	ENSG00000131873	ENST00000254190	ENSE00000860485	2	-
chr15_101906401_101910728	multiexon	PCSK6-001	1	ENSG00000140479	ENST00000561177	ENSE00003497655	12	-	ENSG00000140479	ENST00000561177	ENSE00003506606	13	-
chr15_101968097_101972305	multiexon	PCSK6-001	1	ENSG00000140479	ENST00000561177	ENSE00003502430	3	-	ENSG00000140479	ENST00000561177	ENSE00003602422	6	-
chr15_22862935_22864369	multiexon	TUBGCP5-001	1	ENSG00000153575	ENST00000283645	ENSE00001316250	15	+	ENSG00000153575	ENST00000283645	ENSE00001297806	16	+
chr15_22872399_22877969	intergenic	TUBGCP5-001	1
chr15_22925777_22929895	multiexon	CYFIP1-001	1	ENSG00000068793	ENST00000313077	ENSE00001694018	2	+	ENSG00000068793	ENST00000313077	ENSE00001325393	6	+
chr15_25599500_25605674	multiexon	UBE3A-001	1	ENSG00000114062	ENST00000232165	ENSE00000778629	7	-	ENSG00000114062	ENST00000232165	ENSE00000815075	11	-
chr15_25638893_25657118	intronic	UBE3A-001	1
chr15_25650608_25657118	multiexon	UBE3A-001	1	ENSG00000114062	ENST00000232165	ENSE00001376416	2	-	ENSG00000114062	ENST00000232165	ENSE00003638041	4	-
chr15_25650608_25660989	intronic	UBE3A-001	1
chr15_25650608_25667108	intronic	UBE3A-001	1
chr15_25654235_25660989	intronic	UBE3A-001	1
chr15_28389019_28391490	multiexon	HERC2-001	1	ENSG00000128731	ENST00000261609	ENSE00001313253	71	-	ENSG00000128731	ENST00000261609	ENSE00001308643	74	-
chr15_30053342_30054641	multiexon	TJP1-001	1	ENSG00000104067	ENST00000346128	ENSE00001001849	6	-	ENSG00000104067	ENST00000346128	ENSE00001001840	8	-
chr15_30936842_30939917	multiexon	ARHGAP11B-003	3	ENSG00000187951	ENST00000563110	ENSE00002613568	8	+	ENSG00000187951	ENST00000563110	ENSE00002625007	10	+
chr15_31200321_31206294	multiexon	FAN1-001	1	ENSG00000198690	ENST00000362065	ENSE00003532944	3	+	ENSG00000198690	ENST00000362065	ENSE00003471464	5	+
chr15_32498465_32500399	intergenic
chr15_33149216_33194241	multiexon	FMN1-001	1	ENSG00000248905	ENST00000334528	ENSE00001387686	9	-	ENSG00000248905	ENST00000334528	ENSE00003534239	13	-
chr15_33149216_33202736	multiexon	FMN1-001	1	ENSG00000248905	ENST00000334528	ENSE00003560196	7	-	ENSG00000248905	ENST00000334528	ENSE00003534239	13	-
chr15_33180373_33194241	multiexon	FMN1-001	1	ENSG00000248905	ENST00000334528	ENSE00001387686	9	-	ENSG00000248905	ENST00000334528	ENSE00001387740	12	-
chr15_35207239_35219339	multiexon	AQR-001	1	ENSG00000021776	ENST00000156471	ENSE00001099435	13	-	ENSG00000021776	ENST00000156471	ENSE00000334741	16	-
chr15_35219236_35231014	multiexon	AQR-001	1	ENSG00000021776	ENST00000156471	ENSE00001099430	9	-	ENSG00000021776	ENST00000156471	ENSE00001099435	13	-
chr15_35224519_35231014	multiexon	AQR-001	1	ENSG00000021776	ENST00000156471	ENSE00001099430	9	-	ENSG00000021776	ENST00000156471	ENSE00000674608	11	-
chr15_35742886_35747021	multiexon	DPH6-001	1	ENSG00000134146	ENST00000256538	ENSE00003600244	4	-	ENSG00000134146	ENST00000256538	ENSE00000941739	5	-
chr15_36936479_36950106	multiexon	C15orf41-001	1	ENSG00000186073	ENST00000566621	ENSE00003541637	2	+	ENSG00000186073	ENST00000566621	ENSE00003658661	5	+
chr15_36983886_37002162	multiexon	C15orf41-001	1	ENSG00000186073	ENST00000566621	ENSE00003665385	6	+	ENSG00000186073	ENST00000566621	ENSE00003550015	10	+
chr15_38591574_38617010	multiexon	SPRED1-001	1	ENSG00000166068	ENST00000299084	ENSE00003513959	2	+	ENSG00000166068	ENST00000299084	ENSE00003590128	4	+
chr15_40457254_40462882	multiexon	BUB1B-001	1	ENSG00000156970	ENST00000287598	ENSE00003642586	2	+	ENSG00000156970	ENST00000287598	ENSE00003578473	4	+
chr15_40863803_40864099	monoexon	RPUSD2-001	1	ENSG00000166133	ENST00000315616	ENSE00001100092	2	+
chr15_40895113_40903709	multiexon	CASC5-001	1	ENSG00000137812	ENST00000399668	ENSE00003536596	2	+	ENSG00000137812	ENST00000399668	ENSE00003659959	7	+
chr15_40901045_40911209	multiexon	CASC5-001	1	ENSG00000137812	ENST00000399668	ENSE00003682424	5	+	ENSG00000137812	ENST00000399668	ENSE00003533784	9	+
chr15_41001223_41021022	multiexon	RAD51-001	1	ENSG00000051180	ENST00000267868	ENSE00003614784	5	+	ENSG00000051180	ENST00000267868	ENSE00003596640	7	+
chr15_41036245_41037457	multiexon	RMDN3-001	1	ENSG00000137824	ENST00000260385	ENSE00003688648	4	-	ENSG00000137824	ENST00000260385	ENSE00003575584	5	-
chr15_41361768_41362745	multiexon	INO80-001	1	ENSG00000128908	ENST00000361937	ENSE00003481622	13	-	ENSG00000128908	ENST00000361937	ENSE00001801424	14	-
chr15_41648237_41650456	multiexon	NUSAP1-001	1	ENSG00000137804	ENST00000414849	ENSE00003611800	5	+	ENSG00000137804	ENST00000414849	ENSE00003651372	6	+
chr15_41961026_41962156	monoexon	MGA-001	1	ENSG00000174197	ENST00000566586	ENSE00001762919	1	+
chr15_41988273_41991357	multiexon	MGA-001	1	ENSG00000174197	ENST00000566586	ENSE00001654253	2	+	ENSG00000174197	ENST00000566586	ENSE00000676928	4	+
chr15_41999926_42000406	multiexon	MGA-001	1	ENSG00000174197	ENST00000566586	ENSE00000884071	5	+	ENSG00000174197	ENST00000566586	ENSE00000884072	6	+
chr15_42553156_42560230	multiexon	TMEM87A-001	1	ENSG00000103978	ENST00000389834	ENSE00003462071	3	-	ENSG00000103978	ENST00000389834	ENSE00003642938	6	-
chr15_43086842_43109295	multiexon	TTBK2-001	1	ENSG00000128881	ENST00000267890	ENSE00000942477	7	-	ENSG00000128881	ENST00000267890	ENSE00000942480	10	-
chr15_43102812_43109295	multiexon	TTBK2-001	1	ENSG00000128881	ENST00000267890	ENSE00000942477	7	-	ENSG00000128881	ENST00000267890	ENSE00001293443	9	-
chr15_43120126_43132631	multiexon	TTBK2-001	1	ENSG00000128881	ENST00000267890	ENSE00003657458	4	-	ENSG00000128881	ENST00000267890	ENSE00000942476	6	-
chr15_43164809_43170882	multiexon	TTBK2-001	1	ENSG00000128881	ENST00000267890	ENSE00003688715	2	-	ENSG00000128881	ENST00000267890	ENSE00001787463	3	-
chr15_43242460_43258484	multiexon	UBR1-001	1	ENSG00000159459	ENST00000290650	ENSE00003633134	41	-	ENSG00000159459	ENST00000290650	ENSE00003562977	46	-
chr15_43313473_43317627	multiexon	UBR1-001	1	ENSG00000159459	ENST00000290650	ENSE00003693889	24	-	ENSG00000159459	ENST00000290650	ENSE00003549392	27	-
chr15_43670045_43675702	multiexon	TUBGCP4-001	1	ENSG00000137822	ENST00000260383	ENSE00003671230	5	+	ENSG00000137822	ENST00000260383	ENSE00003578179	7	+
chr15_43690236_43694048	multiexon	TUBGCP4-001	1	ENSG00000137822	ENST00000260383	ENSE00000942018	13	+	ENSG00000137822	ENST00000260383	ENSE00003615126	15	+
chr15_43707792_43708614	multiexon	TP53BP1-001	1	ENSG00000067369	ENST00000382044	ENSE00003460383	22	-	ENSG00000067369	ENST00000382044	ENSE00003590260	23	-
chr15_44046022_44048964	multiexon	PDIA3-001	1	ENSG00000167004	ENST00000300289	ENSE00003561751	2	+	ENSG00000167004	ENST00000300289	ENSE00003550998	3	+
chr15_44048847_44055404	multiexon	PDIA3-001	1	ENSG00000167004	ENST00000300289	ENSE00003550998	3	+	ENSG00000167004	ENST00000300289	ENSE00003488413	5	+
chr15_44053622_44055404	multiexon	PDIA3-001	1	ENSG00000167004	ENST00000300289	ENSE00003534718	4	+	ENSG00000167004	ENST00000300289	ENSE00003488413	5	+
chr15_44134613_44136252	multiexon	WDR76-001	1	ENSG00000092470	ENST00000263795	ENSE00001182711	6	+	ENSG00000092470	ENST00000263795	ENSE00001182703	8	+
chr15_44629961_44630515	multiexon	CASC4-001	1	ENSG00000166734	ENST00000299957	ENSE00003596613	5	+	ENSG00000166734	ENST00000299957	ENSE00003666441	6	+
chr15_44671888_44673174	multiexon	CASC4-001	1	ENSG00000166734	ENST00000299957	ENSE00003506687	7	+	ENSG00000166734	ENST00000299957	ENSE00003535592	8	+
chr15_44776422_44778898	multiexon	CTDSPL2-001	1	ENSG00000137770	ENST00000260327	ENSE00000684172	3	+	ENSG00000137770	ENST00000260327	ENSE00000684233	4	+
chr15_44782982_44788656	multiexon	CTDSPL2-001	1	ENSG00000137770	ENST00000260327	ENSE00000475284	5	+	ENSG00000137770	ENST00000260327	ENSE00003483817	6	+
chr15_44907561_44912601	multiexon	SPG11-001	1	ENSG00000104133	ENST00000261866	ENSE00001183204	15	-	ENSG00000104133	ENST00000261866	ENSE00003582020	16	-
chr15_45467417_45470504	multiexon	SHF-001	1	ENSG00000138606	ENST00000290894	ENSE00003622820	3	-	ENSG00000138606	ENST00000290894	ENSE00003483091	4	-
chr15_48888480_48905289	multiexon	FBN1-001	1	ENSG00000166147	ENST00000316623	ENSE00001761744	3	-	ENSG00000166147	ENST00000316623	ENSE00001783191	6	-
chr15_49319562_49320879	multiexon	SECISBP2L-001	1	ENSG00000138593	ENST00000559471	ENSE00003509297	5	-	ENSG00000138593	ENST00000559471	ENSE00000942208	7	-
chr15_49517402_49531564	multiexon	GALK2-013	13	ENSG00000156958	ENST00000559208	ENSE00002556218	4	+	ENSG00000156958	ENST00000559208	ENSE00003533918	6	+
chr15_49517402_49584734	intronic	GALK2-001	1
chr15_49528048_49531564	multiexon	GALK2-001	1	ENSG00000156958	ENST00000327171	ENSE00003682735	4	+	ENSG00000156958	ENST00000327171	ENSE00003528785	5	+
chr15_49528048_49575915	multiexon	GALK2-001	1	ENSG00000156958	ENST00000327171	ENSE00003682735	4	+	ENSG00000156958	ENST00000327171	ENSE00003458850	7	+
chr15_49528048_49584734	multiexon	GALK2-001	1	ENSG00000156958	ENST00000327171	ENSE00003682735	4	+	ENSG00000156958	ENST00000327171	ENSE00003546714	8	+
chr15_49880213_49882204	multiexon	FAM227B-001	1	ENSG00000166262	ENST00000299338	ENSE00003666805	4	-	ENSG00000166262	ENST00000299338	ENSE00003611331	5	-
chr15_50330965_50339661	multiexon	ATP8B4-001	1	ENSG00000104043	ENST00000559829	ENSE00001015182	4	-	ENSG00000104043	ENST00000559829	ENSE00003458760	6	-
chr15_50330965_50366382	multiexon	ATP8B4-001	1	ENSG00000104043	ENST00000559829	ENSE00001335315	3	-	ENSG00000104043	ENST00000559829	ENSE00003458760	6	-
chr15_50330965_50399205	multiexon	ATP8B4-001	1	ENSG00000104043	ENST00000559829	ENSE00001409398	2	-	ENSG00000104043	ENST00000559829	ENSE00003458760	6	-
chr15_50592986_50593565	multiexon	GABPB1-001	1	ENSG00000104064	ENST00000380877	ENSE00001377588	5	-	ENSG00000104064	ENST00000380877	ENSE00000884614	6	-
chr15_50592986_50601995	multiexon	GABPB1-001	1	ENSG00000104064	ENST00000380877	ENSE00003578049	2	-	ENSG00000104064	ENST00000380877	ENSE00000884614	6	-
chr15_50733546_50741682	multiexon	USP8-001	1	ENSG00000138592	ENST00000396444	ENSE00003532812	3	+	ENSG00000138592	ENST00000396444	ENSE00003631388	4	+
chr15_50757244_50763992	multiexon	USP8-001	1	ENSG00000138592	ENST00000396444	ENSE00003572398	7	+	ENSG00000138592	ENST00000396444	ENSE00003640783	8	+
chr15_50862084_50867986	multiexon	TRPM7-001	1	ENSG00000092439	ENST00000313478	ENSE00003543849	33	-	ENSG00000092439	ENST00000313478	ENSE00003564664	38	-
chr15_50867049_50867986	multiexon	TRPM7-001	1	ENSG00000092439	ENST00000313478	ENSE00003543849	33	-	ENSG00000092439	ENST00000313478	ENSE00003525258	34	-
chr15_50929619_50931745	multiexon	TRPM7-001	1	ENSG00000092439	ENST00000313478	ENSE00000884674	6	-	ENSG00000092439	ENST00000313478	ENSE00000942189	7	-
chr15_50935537_50955243	multiexon	TRPM7-001	1	ENSG00000092439	ENST00000313478	ENSE00001316070	2	-	ENSG00000092439	ENST00000313478	ENSE00000884675	5	-
chr15_50940884_50955243	multiexon	TRPM7-001	1	ENSG00000092439	ENST00000313478	ENSE00001316070	2	-	ENSG00000092439	ENST00000313478	ENSE00000884677	4	-
chr15_51039692_51041067	multiexon	SPPL2A-001	1	ENSG00000138600	ENST00000261854	ENSE00003481063	3	-	ENSG00000138600	ENST00000261854	ENSE00000931390	5	-
chr15_51204275_51207768	multiexon	AP4E1-001	1	ENSG00000081014	ENST00000261842	ENSE00003515423	2	+	ENSG00000081014	ENST00000261842	ENSE00001102077	3	+
chr15_51204275_51223168	multiexon	AP4E1-001	1	ENSG00000081014	ENST00000261842	ENSE00003515423	2	+	ENSG00000081014	ENST00000261842	ENSE00000688560	7	+
chr15_51240217_51250991	multiexon	AP4E1-001	1	ENSG00000081014	ENST00000261842	ENSE00003502667	11	+	ENSG00000081014	ENST00000261842	ENSE00003549059	14	+
chr15_51250689_51260574	multiexon	AP4E1-001	1	ENSG00000081014	ENST00000261842	ENSE00003549059	14	+	ENSG00000081014	ENST00000261842	ENSE00003607900	15	+
chr15_51743842_51747425	multiexon	DMXL2-001	1	ENSG00000104093	ENST00000251076	ENSE00003496487	39	-	ENSG00000104093	ENST00000251076	ENSE00001716330	41	-
chr15_51855578_51868378	multiexon	DMXL2-001	1	ENSG00000104093	ENST00000251076	ENSE00003476083	2	-	ENSG00000104093	ENST00000251076	ENSE00003648780	6	-
chr15_52179786_52181342	multiexon	TMOD3-001	1	ENSG00000138594	ENST00000308580	ENSE00003676764	4	+	ENSG00000138594	ENST00000308580	ENSE00003649448	5	+
chr15_52188616_52194233	multiexon	TMOD3-001	1	ENSG00000138594	ENST00000308580	ENSE00001637299	7	+	ENSG00000138594	ENST00000308580	ENSE00003479780	9	+
chr15_52718027_52725482	multiexon	MYO5A-001	1	ENSG00000197535	ENST00000399231	ENSE00001388399	2	-	ENSG00000197535	ENST00000399231	ENSE00003603264	4	-
chr15_55619729_55626205	multiexon	PIGB-001	1	ENSG00000069943	ENST00000164305	ENSE00003466646	4	+	ENSG00000069943	ENST00000164305	ENSE00003690362	6	+
chr15_56216844_56258744	multiexon	NEDD4-006	6	ENSG00000069869	ENST00000435532	ENSE00003585173	2	-	ENSG00000069869	ENST00000435532	ENSE00003577303	5	-
chr15_56243574_56258744	multiexon	NEDD4-006	6	ENSG00000069869	ENST00000435532	ENSE00003585173	2	-	ENSG00000069869	ENST00000435532	ENSE00003556885	4	-
chr15_56311594_56454438	intergenic	CD24P2-001	1
chr15_56434976_56436681	multiexon	RFX7-001	1	ENSG00000181827	ENST00000559447	ENSE00003610391	3	-	ENSG00000181827	ENST00000559447	ENSE00003551622	4	-
chr15_56434976_56535485	intergenic	RFX7-001	1
chr15_56686363_56687032	multiexon	TEX9-001	1	ENSG00000151575	ENST00000352903	ENSE00001103342	8	+	ENSG00000151575	ENST00000352903	ENSE00001000446	9	+
chr15_56981239_56985413	multiexon	ZNF280D-001	1	ENSG00000137871	ENST00000559237	ENSE00003571452	6	-	ENSG00000137871	ENST00000559237	ENSE00003548650	8	-
chr15_56993131_56999504	multiexon	ZNF280D-001	1	ENSG00000137871	ENST00000559237	ENSE00001718968	2	-	ENSG00000137871	ENST00000559237	ENSE00003622068	5	-
chr15_57212090_57384089	multiexon	TCF12-001	1	ENSG00000140262	ENST00000267811	ENSE00003647364	2	+	ENSG00000140262	ENST00000267811	ENSE00003651986	5	+
chr15_57383987_57387361	intronic	TCF12-001	1
chr15_57523350_57526305	multiexon	TCF12-001	1	ENSG00000140262	ENST00000267811	ENSE00003623588	9	+	ENSG00000140262	ENST00000267811	ENSE00003630817	12	+
chr15_59204762_59209198	multiexon	SLTM-001	1	ENSG00000137776	ENST00000380516	ENSE00003585086	3	-	ENSG00000137776	ENST00000380516	ENSE00003507749	5	-
chr15_59470592_59480415	multiexon	MYO1E-001	1	ENSG00000157483	ENST00000288235	ENSE00003497697	18	-	ENSG00000157483	ENST00000288235	ENSE00001099453	19	-
chr15_59548483_59564648	multiexon	MYO1E-001	1	ENSG00000157483	ENST00000288235	ENSE00001270979	2	-	ENSG00000157483	ENST00000288235	ENSE00003587532	4	-
chr15_60648118_60656722	multiexon	ANXA2-001	1	ENSG00000182718	ENST00000396024	ENSE00003534334	5	-	ENSG00000182718	ENST00000396024	ENSE00003497446	8	-
chr15_60734615_60737990	intronic	NARG2-001	1
chr15_60745802_60758912	multiexon	NARG2-001	1	ENSG00000128915	ENST00000261520	ENSE00003529637	5	-	ENSG00000128915	ENST00000261520	ENSE00003484569	9	-
chr15_61307997_61327125	intronic	RORA-001	1
chr15_62221700_62223458	multiexon	VPS13C-001	1	ENSG00000129003	ENST00000249837	ENSE00001377714	48	-	ENSG00000129003	ENST00000249837	ENSE00001364505	49	-
chr15_62299507_62306191	multiexon	VPS13C-001	1	ENSG00000129003	ENST00000249837	ENSE00001124945	8	-	ENSG00000129003	ENST00000249837	ENSE00001124918	13	-
chr15_62325640_62336454	multiexon	VPS13C-001	1	ENSG00000129003	ENST00000249837	ENSE00001125004	2	-	ENSG00000129003	ENST00000249837	ENSE00000449794	5	-
chr15_62871704_62881961	intronic	TLN2-001	1
chr15_62966026_62978995	multiexon	TLN2-001	1	ENSG00000171914	ENST00000561311	ENSE00001124524	9	+	ENSG00000171914	ENST00000561311	ENSE00001790685	11	+
chr15_63824846_63829355	multiexon	USP3-001	1	ENSG00000140455	ENST00000380324	ENSE00003620731	2	+	ENSG00000140455	ENST00000380324	ENSE00003501637	3	+
chr15_63824846_63855207	multiexon	USP3-001	1	ENSG00000140455	ENST00000380324	ENSE00003620731	2	+	ENSG00000140455	ENST00000380324	ENSE00003603241	8	+
chr15_63845914_63855207	multiexon	USP3-001	1	ENSG00000140455	ENST00000380324	ENSE00003487983	4	+	ENSG00000140455	ENST00000380324	ENSE00003603241	8	+
chr15_64056295_64067848	multiexon	HERC1-001	1	ENSG00000103657	ENST00000443617	ENSE00003588587	2	-	ENSG00000103657	ENST00000443617	ENSE00003528804	3	-
chr15_64066893_64067848	monoexon	HERC1-001	1	ENSG00000103657	ENST00000443617	ENSE00003588587	2	-
chr15_64404772_64411053	multiexon	SNX1-001	1	ENSG00000028528	ENST00000559844	ENSE00003669418	2	+	ENSG00000028528	ENST00000559844	ENSE00003689569	4	+
chr15_64404772_64415745	multiexon	SNX1-001	1	ENSG00000028528	ENST00000559844	ENSE00003669418	2	+	ENSG00000028528	ENST00000559844	ENSE00003658262	5	+
chr15_64410316_64411053	multiexon	SNX1-001	1	ENSG00000028528	ENST00000559844	ENSE00003649498	3	+	ENSG00000028528	ENST00000559844	ENSE00003689569	4	+
chr15_64410316_64415745	multiexon	SNX1-001	1	ENSG00000028528	ENST00000559844	ENSE00003649498	3	+	ENSG00000028528	ENST00000559844	ENSE00003658262	5	+
chr15_64543711_64592922	multiexon	CSNK1G1-001	1	ENSG00000169118	ENST00000303052	ENSE00003618541	2	-	ENSG00000169118	ENST00000303052	ENSE00001136521	4	-
chr15_64543711_64592922	multiexon	CTD-2116N17.1-005	5	ENSG00000259316	ENST00000606793	ENSE00003696917	3	-	ENSG00000259316	ENST00000606793	ENSE00003695343	6	-
chr15_64592518_64592922	monoexon	CSNK1G1-001	1	ENSG00000169118	ENST00000303052	ENSE00003618541	2	-
chr15_64592518_64592922	monoexon	CTD-2116N17.1-001	1	ENSG00000259316	ENST00000561349	ENSE00003569479	3	-
chr15_65110145_65111422	multiexon	PIF1-001	1	ENSG00000140451	ENST00000268043	ENSE00003622394	9	-	ENSG00000140451	ENST00000268043	ENSE00000943124	11	-
chr15_65266940_65275931	multiexon	SPG21-001	1	ENSG00000090487	ENST00000204566	ENSE00003687886	2	-	ENSG00000090487	ENST00000204566	ENSE00003482662	5	-
chr15_65273202_65275931	multiexon	SPG21-001	1	ENSG00000090487	ENST00000204566	ENSE00003687886	2	-	ENSG00000090487	ENST00000204566	ENSE00003589065	3	-
chr15_65445885_65447419	multiexon	CLPX-001	1	ENSG00000166855	ENST00000300107	ENSE00003480714	11	-	ENSG00000166855	ENST00000300107	ENSE00003538680	12	-
chr15_65743337_65744440	multiexon	DPP8-001	1	ENSG00000074603	ENST00000341861	ENSE00003532925	18	-	ENSG00000074603	ENST00000341861	ENSE00003491262	19	-
chr15_65771218_65772737	multiexon	DPP8-001	1	ENSG00000074603	ENST00000341861	ENSE00001354044	10	-	ENSG00000074603	ENST00000341861	ENSE00001354043	11	-
chr15_65772560_65773953	multiexon	DPP8-001	1	ENSG00000074603	ENST00000341861	ENSE00001354048	9	-	ENSG00000074603	ENST00000341861	ENSE00001354044	10	-
chr15_65799581_65804902	multiexon	DPP8-001	1	ENSG00000074603	ENST00000341861	ENSE00003562366	2	-	ENSG00000074603	ENST00000341861	ENSE00001281378	3	-
chr15_65804633_65808129	putativeexon	DPP8-001	1	ENSG00000074603	ENST00000341861	ENSE00001880198	1	-	ENSG00000074603	ENST00000341861	ENSE00003562366	2	-
chr15_65994643_65995346	multiexon	DENND4A-001	1	ENSG00000174485	ENST00000443035	ENSE00001200285	16	-	ENSG00000174485	ENST00000443035	ENSE00001268791	17	-
chr15_66030045_66031213	multiexon	DENND4A-001	1	ENSG00000174485	ENST00000443035	ENSE00003507199	6	-	ENSG00000174485	ENST00000443035	ENSE00003689131	7	-
chr15_66641398_66641775	multiexon	TIPIN-001	1	ENSG00000075131	ENST00000261881	ENSE00003604788	5	-	ENSG00000075131	ENST00000261881	ENSE00003622952	6	-
chr15_66727365_66729230	multiexon	MAP2K1-001	1	ENSG00000169032	ENST00000307102	ENSE00003630653	2	+	ENSG00000169032	ENST00000307102	ENSE00003568990	3	+
chr15_67004006_67009478	multiexon	SMAD6-002	2	ENSG00000137834	ENST00000557916	ENSE00000931633	2	+	ENSG00000137834	ENST00000557916	ENSE00002565379	4	+
chr15_67519239_67529158	putativeexon	AAGAB-006	6	ENSG00000103591	ENST00000558725	ENSE00003475709	2	-	ENSG00000103591	ENST00000558725	ENSE00002549289	6	-
chr15_67524152_67529158	multiexon	AAGAB-001	1	ENSG00000103591	ENST00000261880	ENSE00003654529	2	-	ENSG00000103591	ENST00000261880	ENSE00003638146	5	-
chr15_67528317_67529158	multiexon	AAGAB-001	1	ENSG00000103591	ENST00000261880	ENSE00003654529	2	-	ENSG00000103591	ENST00000261880	ENSE00003598217	4	-
chr15_67873092_67893087	multiexon	MAP2K5-001	1	ENSG00000137764	ENST00000178640	ENSE00003578756	4	+	ENSG00000137764	ENST00000178640	ENSE00003681520	8	+
chr15_67893023_67956983	multiexon	MAP2K5-001	1	ENSG00000137764	ENST00000178640	ENSE00003681520	8	+	ENSG00000137764	ENST00000178640	ENSE00003533272	13	+
chr15_67923226_67956983	multiexon	MAP2K5-001	1	ENSG00000137764	ENST00000178640	ENSE00003594768	9	+	ENSG00000137764	ENST00000178640	ENSE00003533272	13	+
chr15_67938569_67956983	multiexon	MAP2K5-001	1	ENSG00000137764	ENST00000178640	ENSE00003625694	10	+	ENSG00000137764	ENST00000178640	ENSE00003533272	13	+
chr15_67956935_67995746	multiexon	MAP2K5-001	1	ENSG00000137764	ENST00000178640	ENSE00003533272	13	+	ENSG00000137764	ENST00000178640	ENSE00003465875	16	+
chr15_67956935_68040939	multiexon	MAP2K5-001	1	ENSG00000137764	ENST00000178640	ENSE00003533272	13	+	ENSG00000137764	ENST00000178640	ENSE00003515860	19	+
chr15_67984817_67995746	multiexon	MAP2K5-001	1	ENSG00000137764	ENST00000178640	ENSE00003497335	14	+	ENSG00000137764	ENST00000178640	ENSE00003465875	16	+
chr15_67984817_68040939	multiexon	MAP2K5-001	1	ENSG00000137764	ENST00000178640	ENSE00003497335	14	+	ENSG00000137764	ENST00000178640	ENSE00003515860	19	+
chr15_68434284_68439038	multiexon	PIAS1-001	1	ENSG00000033800	ENST00000249636	ENSE00003583963	3	+	ENSG00000033800	ENST00000249636	ENSE00000695841	6	+
chr15_69709722_69714774	multiexon	KIF23-001	1	ENSG00000137807	ENST00000559279	ENSE00003526343	3	+	ENSG00000137807	ENST00000559279	ENSE00003472357	6	+
chr15_69713986_69714774	multiexon	KIF23-001	1	ENSG00000137807	ENST00000559279	ENSE00000696409	4	+	ENSG00000137807	ENST00000559279	ENSE00003472357	6	+
chr15_69715498_69718796	multiexon	KIF23-001	1	ENSG00000137807	ENST00000559279	ENSE00003595864	7	+	ENSG00000137807	ENST00000559279	ENSE00003637437	9	+
chr15_69728477_69729061	multiexon	KIF23-001	1	ENSG00000137807	ENST00000559279	ENSE00003543666	13	+	ENSG00000137807	ENST00000559279	ENSE00003495108	14	+
chr15_70949269_70952555	putativeexon	UACA-001	1	ENSG00000137831	ENST00000322954	ENSE00003617095	18	-	ENSG00000137831	ENST00000322954	ENSE00001936843	19	-
chr15_71174814_71175247	putativeexon	THAP10-001	1	ENSG00000129028	ENST00000249861	ENSE00001100516	2	-	ENSG00000129028	ENST00000249861	ENSE00001100513	3	-
chr15_71534988_71549054	multiexon	THSD4-002	2	ENSG00000187720	ENST00000355327	ENSE00001483239	5	+	ENSG00000187720	ENST00000355327	ENSE00001483238	6	+
chr15_71952869_71953073	monoexon	THSD4-001	1	ENSG00000187720	ENST00000357769	ENSE00003670857	2	+
chr15_72180345_72186119	multiexon	MYO9A-001	1	ENSG00000066933	ENST00000356056	ENSE00003503584	26	-	ENSG00000066933	ENST00000356056	ENSE00001179777	27	-
chr15_72208711_72231268	multiexon	MYO9A-001	1	ENSG00000066933	ENST00000356056	ENSE00003484241	16	-	ENSG00000066933	ENST00000356056	ENSE00003658920	19	-
chr15_72292192_72320134	multiexon	MYO9A-001	1	ENSG00000066933	ENST00000356056	ENSE00003578565	4	-	ENSG00000066933	ENST00000356056	ENSE00003651890	9	-
chr15_72300167_72320134	multiexon	MYO9A-001	1	ENSG00000066933	ENST00000356056	ENSE00003578565	4	-	ENSG00000066933	ENST00000356056	ENSE00003664579	8	-
chr15_72324835_72338975	multiexon	MYO9A-001	1	ENSG00000066933	ENST00000356056	ENSE00003498053	2	-	ENSG00000066933	ENST00000356056	ENSE00003684464	3	-
chr15_72338065_72338975	monoexon	MYO9A-001	1	ENSG00000066933	ENST00000356056	ENSE00003498053	2	-
chr15_72509750_72511451	multiexon	PKM-002	2	ENSG00000067225	ENST00000569857	ENSE00003522795	2	-	ENSG00000067225	ENST00000569857	ENSE00003663072	3	-
chr15_72789132_72837305	intronic	ARIH1-001	1
chr15_72810408_72837305	multiexon	ARIH1-001	1	ENSG00000166233	ENST00000379887	ENSE00003554469	2	+	ENSG00000166233	ENST00000379887	ENSE00001101256	3	+
chr15_72810408_72848248	multiexon	ARIH1-001	1	ENSG00000166233	ENST00000379887	ENSE00003554469	2	+	ENSG00000166233	ENST00000379887	ENSE00003687059	5	+
chr15_72810408_72853890	multiexon	ARIH1-001	1	ENSG00000166233	ENST00000379887	ENSE00003554469	2	+	ENSG00000166233	ENST00000379887	ENSE00001101249	6	+
chr15_72810408_72864506	multiexon	ARIH1-001	1	ENSG00000166233	ENST00000379887	ENSE00003554469	2	+	ENSG00000166233	ENST00000379887	ENSE00003657854	11	+
chr15_72837161_72848248	multiexon	ARIH1-001	1	ENSG00000166233	ENST00000379887	ENSE00001101256	3	+	ENSG00000166233	ENST00000379887	ENSE00003687059	5	+
chr15_72837161_72853890	multiexon	ARIH1-001	1	ENSG00000166233	ENST00000379887	ENSE00001101256	3	+	ENSG00000166233	ENST00000379887	ENSE00001101249	6	+
chr15_72837161_72855841	multiexon	ARIH1-001	1	ENSG00000166233	ENST00000379887	ENSE00001101256	3	+	ENSG00000166233	ENST00000379887	ENSE00003462766	7	+
chr15_72837161_72864506	multiexon	ARIH1-001	1	ENSG00000166233	ENST00000379887	ENSE00001101256	3	+	ENSG00000166233	ENST00000379887	ENSE00003657854	11	+
chr15_72847612_72853890	multiexon	ARIH1-001	1	ENSG00000166233	ENST00000379887	ENSE00003679493	4	+	ENSG00000166233	ENST00000379887	ENSE00001101249	6	+
chr15_72847612_72864506	multiexon	ARIH1-001	1	ENSG00000166233	ENST00000379887	ENSE00003679493	4	+	ENSG00000166233	ENST00000379887	ENSE00003657854	11	+
chr15_72855735_72862648	multiexon	ARIH1-001	1	ENSG00000166233	ENST00000379887	ENSE00003462766	7	+	ENSG00000166233	ENST00000379887	ENSE00001250190	10	+
chr15_72855735_72864506	multiexon	ARIH1-001	1	ENSG00000166233	ENST00000379887	ENSE00003462766	7	+	ENSG00000166233	ENST00000379887	ENSE00003657854	11	+
chr15_72873072_72874528	multiexon	ARIH1-001	1	ENSG00000166233	ENST00000379887	ENSE00003568289	12	+	ENSG00000166233	ENST00000379887	ENSE00003462015	13	+
chr15_73052748_73067438	multiexon	ADPGK-001	1	ENSG00000159322	ENST00000567941	ENSE00003673049	2	-	ENSG00000159322	ENST00000567941	ENSE00003682515	4	-
chr15_73052748_73072663	intronic	ADPGK-001	1
chr15_73064124_73067438	multiexon	ADPGK-001	1	ENSG00000159322	ENST00000567941	ENSE00003673049	2	-	ENSG00000159322	ENST00000567941	ENSE00003468991	3	-
chr15_73468744_73470768	multiexon	NEO1-001	1	ENSG00000067141	ENST00000339362	ENSE00001210876	7	+	ENSG00000067141	ENST00000339362	ENSE00001210873	8	+
chr15_74963796_74964115	monoexon	EDC3-001	1	ENSG00000179151	ENST00000315127	ENSE00001253676	3	-
chr15_74963796_74967483	multiexon	EDC3-001	1	ENSG00000179151	ENST00000315127	ENSE00003607247	2	-	ENSG00000179151	ENST00000315127	ENSE00001253676	3	-
chr15_75215989_75219228	multiexon	COX5A-001	1	ENSG00000178741	ENST00000322347	ENSE00003664819	3	-	ENSG00000178741	ENST00000322347	ENSE00001243548	4	-
chr15_75215989_75221573	multiexon	COX5A-001	1	ENSG00000178741	ENST00000322347	ENSE00003498206	2	-	ENSG00000178741	ENST00000322347	ENSE00001243548	4	-
chr15_75219107_75221573	multiexon	COX5A-001	1	ENSG00000178741	ENST00000322347	ENSE00003498206	2	-	ENSG00000178741	ENST00000322347	ENSE00003664819	3	-
chr15_75687021_75688837	multiexon	SIN3A-001	1	ENSG00000169375	ENST00000394947	ENSE00001161592	13	-	ENSG00000169375	ENST00000394947	ENSE00001161590	14	-
chr15_75693071_75694311	multiexon	SIN3A-001	1	ENSG00000169375	ENST00000394947	ENSE00001208538	10	-	ENSG00000169375	ENST00000394947	ENSE00001161606	11	-
chr15_75706546_75715164	multiexon	SIN3A-001	1	ENSG00000169375	ENST00000394947	ENSE00001208563	3	-	ENSG00000169375	ENST00000394947	ENSE00001162471	4	-
chr15_75809600_75819602	multiexon	PTPN9-001	1	ENSG00000169410	ENST00000306726	ENSE00001235380	2	-	ENSG00000169410	ENST00000306726	ENSE00001208509	5	-
chr15_75815462_75819602	multiexon	PTPN9-001	1	ENSG00000169410	ENST00000306726	ENSE00001235380	2	-	ENSG00000169410	ENST00000306726	ENSE00001235366	4	-
chr15_76146727_76175765	multiexon	UBE2Q2-001	1	ENSG00000140367	ENST00000267938	ENSE00003579599	2	+	ENSG00000140367	ENST00000267938	ENSE00003503624	9	+
chr15_76168528_76175765	multiexon	UBE2Q2-001	1	ENSG00000140367	ENST00000267938	ENSE00002460229	6	+	ENSG00000140367	ENST00000267938	ENSE00003503624	9	+
chr15_76226083_76226820	putativeexon	FBXO22-001	1	ENSG00000167196	ENST00000308275	ENSE00001212189	7	+
chr15_76566753_76578822	multiexon	ETFA-001	1	ENSG00000140374	ENST00000557943	ENSE00003466049	6	-	ENSG00000140374	ENST00000557943	ENSE00003542133	9	-
chr15_76566753_76585041	multiexon	ETFA-001	1	ENSG00000140374	ENST00000557943	ENSE00003481087	3	-	ENSG00000140374	ENST00000557943	ENSE00003542133	9	-
chr15_76566753_76588078	multiexon	ETFA-001	1	ENSG00000140374	ENST00000557943	ENSE00003683241	2	-	ENSG00000140374	ENST00000557943	ENSE00003542133	9	-
chr15_76576098_76580286	multiexon	ETFA-001	1	ENSG00000140374	ENST00000557943	ENSE00003641732	5	-	ENSG00000140374	ENST00000557943	ENSE00003557515	8	-
chr15_76576098_76585041	multiexon	ETFA-001	1	ENSG00000140374	ENST00000557943	ENSE00003481087	3	-	ENSG00000140374	ENST00000557943	ENSE00003557515	8	-
chr15_76576098_76588078	multiexon	ETFA-001	1	ENSG00000140374	ENST00000557943	ENSE00003683241	2	-	ENSG00000140374	ENST00000557943	ENSE00003557515	8	-
chr15_76580187_76585041	multiexon	ETFA-001	1	ENSG00000140374	ENST00000557943	ENSE00003481087	3	-	ENSG00000140374	ENST00000557943	ENSE00003641732	5	-
chr15_76580187_76588078	multiexon	ETFA-001	1	ENSG00000140374	ENST00000557943	ENSE00003683241	2	-	ENSG00000140374	ENST00000557943	ENSE00003641732	5	-
chr15_76584772_76588078	multiexon	ETFA-001	1	ENSG00000140374	ENST00000557943	ENSE00003683241	2	-	ENSG00000140374	ENST00000557943	ENSE00003521140	4	-
chr15_76866499_76958130	multiexon	SCAPER-001	1	ENSG00000140386	ENST00000563290	ENSE00003582204	21	-	ENSG00000140386	ENST00000563290	ENSE00003485170	23	-
chr15_76914105_76958130	multiexon	SCAPER-001	1	ENSG00000140386	ENST00000563290	ENSE00003582204	21	-	ENSG00000140386	ENST00000563290	ENSE00003504897	22	-
chr15_77092589_77096974	multiexon	SCAPER-001	1	ENSG00000140386	ENST00000563290	ENSE00003581796	6	-	ENSG00000140386	ENST00000563290	ENSE00003642358	7	-
chr15_77134075_77176217	multiexon	SCAPER-001	1	ENSG00000140386	ENST00000563290	ENSE00003624841	2	-	ENSG00000140386	ENST00000563290	ENSE00003656364	5	-
chr15_77150150_77176217	multiexon	SCAPER-001	1	ENSG00000140386	ENST00000563290	ENSE00003624841	2	-	ENSG00000140386	ENST00000563290	ENSE00003588200	4	-
chr15_77544709_77578846	multiexon	PEAK1-005	5	ENSG00000173517	ENST00000558305	ENSE00002561611	3	-	ENSG00000173517	ENST00000558305	ENSE00002539439	4	-
chr15_77759437_77764156	multiexon	HMG20A-001	1	ENSG00000140382	ENST00000336216	ENSE00001677526	4	+	ENSG00000140382	ENST00000336216	ENSE00001734338	6	+
chr15_78337242_78346529	multiexon	TBC1D2B-001	1	ENSG00000167202	ENST00000409931	ENSE00001698153	2	-	ENSG00000167202	ENST00000409931	ENSE00001160285	3	-
chr15_78837211_78838106	multiexon	PSMA4-001	1	ENSG00000041357	ENST00000044462	ENSE00003473522	6	+	ENSG00000041357	ENST00000044462	ENSE00003486880	7	+
chr15_78885434_78885970	putativeexon	CHRNA5-001	1	ENSG00000169684	ENST00000299565	ENSE00001625623	6	+
chr15_78885434_78893729	intergenic	CHRNA5-001	1
chr15_80390758_80415142	multiexon	ZFAND6-001	1	ENSG00000086666	ENST00000261749	ENSE00001218509	2	+	ENSG00000086666	ENST00000261749	ENSE00001025055	5	+
chr15_80412670_80415142	multiexon	ZFAND6-001	1	ENSG00000086666	ENST00000261749	ENSE00003688955	3	+	ENSG00000086666	ENST00000261749	ENSE00001025055	5	+
chr15_80412670_80423635	multiexon	ZFAND6-001	1	ENSG00000086666	ENST00000261749	ENSE00003688955	3	+	ENSG00000086666	ENST00000261749	ENSE00001343702	6	+
chr15_80750270_80767564	multiexon	ARNT2-001	1	ENSG00000172379	ENST00000303329	ENSE00003577123	3	+	ENSG00000172379	ENST00000303329	ENSE00003615155	5	+
chr15_80762559_80767564	multiexon	ARNT2-001	1	ENSG00000172379	ENST00000303329	ENSE00003634137	4	+	ENSG00000172379	ENST00000303329	ENSE00003615155	5	+
chr15_81199004_81201647	multiexon	KIAA1199-001	1	ENSG00000103888	ENST00000394685	ENSE00000700021	13	+	ENSG00000103888	ENST00000394685	ENSE00000700023	14	+
chr15_81372226_81374732	intronic	C15orf26-004	4
chr15_83295944_83310433	multiexon	CPEB1-016	16	ENSG00000214575	ENST00000569257	ENSE00002576409	2	-	ENSG00000214575	ENST00000569257	ENSE00003499055	4	-
chr15_83301923_83310433	multiexon	CPEB1-016	16	ENSG00000214575	ENST00000569257	ENSE00002576409	2	-	ENSG00000214575	ENST00000569257	ENSE00002608794	3	-
chr15_83357488_83358205	multiexon	AP3B2-001	1	ENSG00000103723	ENST00000261722	ENSE00003586964	2	-	ENSG00000103723	ENST00000261722	ENSE00003619623	4	-
chr15_83710480_83718930	multiexon	BTBD1-001	1	ENSG00000064726	ENST00000261721	ENSE00001103546	3	-	ENSG00000064726	ENST00000261721	ENSE00003593826	4	-
chr15_83710480_83725297	multiexon	BTBD1-001	1	ENSG00000064726	ENST00000261721	ENSE00001103556	2	-	ENSG00000064726	ENST00000261721	ENSE00003593826	4	-
chr15_85223944_85234875	multiexon	SEC11A-001	1	ENSG00000140612	ENST00000268220	ENSE00003490986	2	-	ENSG00000140612	ENST00000268220	ENSE00001105888	4	-
chr15_85230856_85234875	multiexon	SEC11A-001	1	ENSG00000140612	ENST00000268220	ENSE00003490986	2	-	ENSG00000140612	ENST00000268220	ENSE00000944164	3	-
chr15_85607601_85610435	multiexon	PDE8A-001	1	ENSG00000073417	ENST00000310298	ENSE00003683827	3	+	ENSG00000073417	ENST00000310298	ENSE00003643186	4	+
chr15_85607601_85620018	multiexon	PDE8A-001	1	ENSG00000073417	ENST00000310298	ENSE00003683827	3	+	ENSG00000073417	ENST00000310298	ENSE00003522851	6	+
chr15_85607601_85626875	multiexon	PDE8A-001	1	ENSG00000073417	ENST00000310298	ENSE00003683827	3	+	ENSG00000073417	ENST00000310298	ENSE00003633755	7	+
chr15_85657104_85658718	multiexon	PDE8A-001	1	ENSG00000073417	ENST00000310298	ENSE00003498929	15	+	ENSG00000073417	ENST00000310298	ENSE00003530623	16	+
chr15_86182605_86189185	multiexon	AKAP13-001	1	ENSG00000170776	ENST00000361243	ENSE00003532545	9	+	ENSG00000170776	ENST00000361243	ENSE00003512821	10	+
chr15_86198648_86213061	multiexon	AKAP13-001	1	ENSG00000170776	ENST00000361243	ENSE00003496501	11	+	ENSG00000170776	ENST00000361243	ENSE00003570638	14	+
chr15_86207794_86213061	multiexon	AKAP13-001	1	ENSG00000170776	ENST00000361243	ENSE00003504353	13	+	ENSG00000170776	ENST00000361243	ENSE00003570638	14	+
chr15_89656956_89659752	multiexon	ABHD2-001	1	ENSG00000140526	ENST00000352732	ENSE00001226848	2	+	ENSG00000140526	ENST00000352732	ENSE00000943593	3	+
chr15_89656956_89695083	multiexon	ABHD2-001	1	ENSG00000140526	ENST00000352732	ENSE00001226848	2	+	ENSG00000140526	ENST00000352732	ENSE00003661750	4	+
chr15_89656956_89698765	multiexon	ABHD2-001	1	ENSG00000140526	ENST00000352732	ENSE00001226848	2	+	ENSG00000140526	ENST00000352732	ENSE00003617891	5	+
chr15_89656963_89659752	putativeexon	ABHD2-001	1	ENSG00000140526	ENST00000352732	ENSE00001226848	2	+	ENSG00000140526	ENST00000352732	ENSE00000943593	3	+
chr15_89694908_89698765	multiexon	ABHD2-001	1	ENSG00000140526	ENST00000352732	ENSE00003661750	4	+	ENSG00000140526	ENST00000352732	ENSE00003617891	5	+
chr15_89790860_89804074	multiexon	FANCI-001	1	ENSG00000140525	ENST00000300027	ENSE00003645183	2	+	ENSG00000140525	ENST00000300027	ENSE00003482281	4	+
chr15_89811630_89820122	multiexon	FANCI-001	1	ENSG00000140525	ENST00000300027	ENSE00000943565	10	+	ENSG00000140525	ENST00000300027	ENSE00001217519	13	+
chr15_90408727_90414778	putativeexon	AP3S2-002	2	ENSG00000157823	ENST00000560184	ENSE00003523351	4	-	ENSG00000157823	ENST00000560184	ENSE00002544681	5	-
chr15_90408727_90414778	putativeexon	C15orf38-AP3S2-002	2	ENSG00000250021	ENST00000560224	ENSE00003651334	4	-	ENSG00000250021	ENST00000560224	ENSE00002565280	5	-
chr15_90414707_90432372	multiexon	AP3S2-001	1	ENSG00000157823	ENST00000336418	ENSE00003647396	2	-	ENSG00000157823	ENST00000336418	ENSE00003468715	4	-
chr15_90414707_90432372	multiexon	C15orf38-AP3S2-001	1	ENSG00000250021	ENST00000398333	ENSE00003664968	6	-	ENSG00000250021	ENST00000398333	ENSE00003598264	8	-
chr15_90760671_90763123	multiexon	SEMA4B-001	1	ENSG00000185033	ENST00000411539	ENSE00003590152	2	+	ENSG00000185033	ENST00000411539	ENSE00003666194	4	+
chr15_90760671_90764997	multiexon	SEMA4B-001	1	ENSG00000185033	ENST00000411539	ENSE00003590152	2	+	ENSG00000185033	ENST00000411539	ENSE00003561135	7	+
chr15_90969342_90977027	multiexon	IQGAP1-001	1	ENSG00000140575	ENST00000268182	ENSE00003505414	3	+	ENSG00000140575	ENST00000268182	ENSE00003648085	5	+
chr15_90982564_90986710	multiexon	IQGAP1-001	1	ENSG00000140575	ENST00000268182	ENSE00001799868	6	+	ENSG00000140575	ENST00000268182	ENSE00000944000	9	+
chr15_90984738_90986710	multiexon	IQGAP1-001	1	ENSG00000140575	ENST00000268182	ENSE00000943999	8	+	ENSG00000140575	ENST00000268182	ENSE00000944000	9	+
chr15_91256398_91258273	putativeexon	RP11-387D10.2-002	2	ENSG00000259736	ENST00000558105	ENSE00002557785	2	-	ENSG00000259736	ENST00000558105	ENSE00002567800	3	-
chr15_91911481_91911831	intergenic
chr15_92459223_92459688	monoexon	SLCO3A1-001	1	ENSG00000176463	ENST00000318445	ENSE00003519263	2	+
chr15_93428745_93435302	multiexon	AC013394.2-001	1	ENSG00000272888	ENST00000557682	ENSE00003711465	2	+	ENSG00000272888	ENST00000557682	ENSE00003708775	4	+
chr15_93428745_93435302	multiexon	CHD2-013	13	ENSG00000173575	ENST00000556722	ENSE00003705872	2	+	ENSG00000173575	ENST00000556722	ENSE00003709169	4	+
chr15_93467551_93472321	multiexon	CHD2-001	1	ENSG00000173575	ENST00000394196	ENSE00003617328	3	+	ENSG00000173575	ENST00000394196	ENSE00003531220	5	+
chr15_93496587_93499879	multiexon	CHD2-001	1	ENSG00000173575	ENST00000394196	ENSE00003481778	14	+	ENSG00000173575	ENST00000394196	ENSE00003503986	16	+
chr15_93496587_93510743	multiexon	CHD2-001	1	ENSG00000173575	ENST00000394196	ENSE00003481778	14	+	ENSG00000173575	ENST00000394196	ENSE00001255136	17	+
chr15_93521464_93522513	multiexon	CHD2-001	1	ENSG00000173575	ENST00000394196	ENSE00002434605	21	+	ENSG00000173575	ENST00000394196	ENSE00001097892	22	+
chr15_93540187_93541851	multiexon	CHD2-001	1	ENSG00000173575	ENST00000394196	ENSE00001097738	29	+	ENSG00000173575	ENST00000394196	ENSE00003503542	31	+
chr15_94039463_94041986	intronic	RP11-266O8.1-001	1
chr15_94841430_94841959	monoexon	MCTP2-001	1	ENSG00000140563	ENST00000543482	ENSE00003487838	2	+
chr15_94841430_94858866	multiexon	MCTP2-001	1	ENSG00000140563	ENST00000543482	ENSE00003487838	2	+	ENSG00000140563	ENST00000543482	ENSE00003653835	4	+
chr15_94899366_94913409	multiexon	MCTP2-002	2	ENSG00000140563	ENST00000357742	ENSE00003597289	8	+	ENSG00000140563	ENST00000357742	ENSE00003650587	11	+
chr15_94899366_94928754	multiexon	MCTP2-002	2	ENSG00000140563	ENST00000357742	ENSE00003597289	8	+	ENSG00000140563	ENST00000357742	ENSE00003511325	13	+
chr15_94899366_94945248	multiexon	MCTP2-002	2	ENSG00000140563	ENST00000357742	ENSE00003597289	8	+	ENSG00000140563	ENST00000357742	ENSE00003565974	16	+
chr15_94910834_94928754	multiexon	MCTP2-002	2	ENSG00000140563	ENST00000357742	ENSE00003575583	10	+	ENSG00000140563	ENST00000357742	ENSE00003511325	13	+
chr15_94927251_94945248	multiexon	MCTP2-002	2	ENSG00000140563	ENST00000357742	ENSE00003690804	12	+	ENSG00000140563	ENST00000357742	ENSE00003565974	16	+
chr15_94942190_94945248	multiexon	MCTP2-002	2	ENSG00000140563	ENST00000357742	ENSE00003486146	14	+	ENSG00000140563	ENST00000357742	ENSE00003565974	16	+
chr15_94983405_95001475	multiexon	MCTP2-002	2	ENSG00000140563	ENST00000357742	ENSE00003498477	17	+	ENSG00000140563	ENST00000357742	ENSE00003624663	19	+
chr15_99250791_99251336	monoexon	IGF1R-001	1	ENSG00000140443	ENST00000268035	ENSE00003673245	2	+
chr15_99434554_99442850	multiexon	IGF1R-001	1	ENSG00000140443	ENST00000268035	ENSE00003633139	3	+	ENSG00000140443	ENST00000268035	ENSE00003528186	5	+
chr16_1004357_1004666	monoexon	LMF1-001	1	ENSG00000103227	ENST00000262301	ENSE00003650027	2	-
chr16_11063018_11076848	multiexon	CLEC16A-001	1	ENSG00000038532	ENST00000409790	ENSE00000829675	4	+	ENSG00000038532	ENST00000409790	ENSE00003562888	10	+
chr16_11114050_11118778	multiexon	CLEC16A-001	1	ENSG00000038532	ENST00000409790	ENSE00003496961	12	+	ENSG00000038532	ENST00000409790	ENSE00003559926	13	+
chr16_11114050_11154879	multiexon	CLEC16A-001	1	ENSG00000038532	ENST00000409790	ENSE00003496961	12	+	ENSG00000038532	ENST00000409790	ENSE00003532020	19	+
chr16_11214472_11220003	multiexon	CLEC16A-001	1	ENSG00000038532	ENST00000409790	ENSE00003595097	20	+	ENSG00000038532	ENST00000409790	ENSE00000829668	22	+
chr16_11647389_11650591	multiexon	LITAF-001	1	ENSG00000189067	ENST00000571688	ENSE00001380031	2	-	ENSG00000189067	ENST00000571688	ENSE00003463715	3	-
chr16_11791981_11815526	multiexon	TXNDC11-001	1	ENSG00000153066	ENST00000283033	ENSE00003468802	5	-	ENSG00000153066	ENST00000283033	ENSE00003675609	7	-
chr16_11815433_11830089	multiexon	TXNDC11-001	1	ENSG00000153066	ENST00000283033	ENSE00003483323	2	-	ENSG00000153066	ENST00000283033	ENSE00003468802	5	-
chr16_11827838_11830089	multiexon	TXNDC11-001	1	ENSG00000153066	ENST00000283033	ENSE00003483323	2	-	ENSG00000153066	ENST00000283033	ENSE00003505745	3	-
chr16_11857334_11859541	multiexon	ZC3H7A-001	1	ENSG00000122299	ENST00000355758	ENSE00003616689	14	-	ENSG00000122299	ENST00000355758	ENSE00000829712	16	-
chr16_11873022_11876244	multiexon	ZC3H7A-001	1	ENSG00000122299	ENST00000355758	ENSE00003608101	2	-	ENSG00000122299	ENST00000355758	ENSE00003674518	4	-
chr16_11980328_11981607	multiexon	GSPT1-001	1	ENSG00000103342	ENST00000434724	ENSE00001162137	7	-	ENSG00000103342	ENST00000434724	ENSE00003676864	9	-
chr16_1364021_1370518	multiexon	UBE2I-001	1	ENSG00000103275	ENST00000397514	ENSE00003481151	2	+	ENSG00000103275	ENST00000397514	ENSE00003667397	6	+
chr16_14173147_14234617	multiexon	MKL2-001	1	ENSG00000186260	ENST00000571589	ENSE00002640057	2	+	ENSG00000186260	ENST00000571589	ENSE00003525727	3	+
chr16_142594_143323	multiexon	NPRL3-002	2	ENSG00000103148	ENST00000399957	ENSE00003608319	7	-	ENSG00000103148	ENST00000399957	ENSE00003531762	8	-
chr16_14645878_14649566	multiexon	PARN-001	1	ENSG00000140694	ENST00000437198	ENSE00003626404	19	-	ENSG00000140694	ENST00000437198	ENSE00003627614	21	-
chr16_14645878_14687235	multiexon	PARN-001	1	ENSG00000140694	ENST00000437198	ENSE00003614729	13	-	ENSG00000140694	ENST00000437198	ENSE00003627614	21	-
chr16_14687158_14698083	multiexon	PARN-001	1	ENSG00000140694	ENST00000437198	ENSE00003619137	11	-	ENSG00000140694	ENST00000437198	ENSE00003614729	13	-
chr16_14738131_14738466	monoexon	BFAR-001	1	ENSG00000103429	ENST00000261658	ENSE00003646355	2	+
chr16_148143_150507	multiexon	NPRL3-002	2	ENSG00000103148	ENST00000399957	ENSE00003560790	5	-	ENSG00000103148	ENST00000399957	ENSE00003458969	6	-
chr16_15577794_15609285	intronic	C16orf45-001	1
chr16_15967348_15978062	multiexon	FOPNL-001	1	ENSG00000133393	ENST00000255759	ENSE00000909153	2	-	ENSG00000133393	ENST00000255759	ENSE00003470629	4	-
chr16_15973661_15978062	multiexon	FOPNL-001	1	ENSG00000133393	ENST00000255759	ENSE00000909153	2	-	ENSG00000133393	ENST00000255759	ENSE00003662092	3	-
chr16_16101673_16102021	intronic	ABCC1-001	1
chr16_16101673_16103758	multiexon	ABCC1-001	1	ENSG00000103222	ENST00000399410	ENSE00001204696	2	+	ENSG00000103222	ENST00000399410	ENSE00000909138	3	+
chr16_16101673_16108485	multiexon	ABCC1-001	1	ENSG00000103222	ENST00000399410	ENSE00001204696	2	+	ENSG00000103222	ENST00000399410	ENSE00000909131	4	+
chr16_16101673_16110478	multiexon	ABCC1-001	1	ENSG00000103222	ENST00000399410	ENSE00001204696	2	+	ENSG00000103222	ENST00000399410	ENSE00003652954	5	+
chr16_16101673_16130460	multiexon	ABCC1-001	1	ENSG00000103222	ENST00000399410	ENSE00001204696	2	+	ENSG00000103222	ENST00000399410	ENSE00003634034	7	+
chr16_16108348_16110478	multiexon	ABCC1-001	1	ENSG00000103222	ENST00000399410	ENSE00000909131	4	+	ENSG00000103222	ENST00000399410	ENSE00003652954	5	+
chr16_16126966_16130460	multiexon	ABCC1-001	1	ENSG00000103222	ENST00000399410	ENSE00003652402	6	+	ENSG00000103222	ENST00000399410	ENSE00003634034	7	+
chr16_16146581_16150152	multiexon	ABCC1-001	1	ENSG00000103222	ENST00000399410	ENSE00003637114	11	+	ENSG00000103222	ENST00000399410	ENSE00001204619	12	+
chr16_16180681_16184445	multiexon	ABCC1-001	1	ENSG00000103222	ENST00000399410	ENSE00003626408	18	+	ENSG00000103222	ENST00000399410	ENSE00003688001	19	+
chr16_16215832_16219768	multiexon	ABCC1-001	1	ENSG00000103222	ENST00000399410	ENSE00000830049	24	+	ENSG00000103222	ENST00000399410	ENSE00000830062	26	+
chr16_16218646_16219768	multiexon	ABCC1-001	1	ENSG00000103222	ENST00000399410	ENSE00000830060	25	+	ENSG00000103222	ENST00000399410	ENSE00000830062	26	+
chr16_1682213_1691188	multiexon	CRAMP1L-001	1	ENSG00000007545	ENST00000397412	ENSE00001686939	4	+	ENSG00000007545	ENST00000397412	ENSE00003572750	6	+
chr16_1859239_1859834	putativeexon	HAGH-001	1	ENSG00000063854	ENST00000397356	ENSE00003503337	8	-	ENSG00000063854	ENST00000397356	ENSE00002590337	9	-
chr16_1872301_1873038	multiexon	HAGH-001	1	ENSG00000063854	ENST00000397356	ENSE00003569659	2	-	ENSG00000063854	ENST00000397356	ENSE00003649660	3	-
chr16_18809247_18810156	multiexon	ARL6IP1-001	1	ENSG00000170540	ENST00000304414	ENSE00003669872	2	-	ENSG00000170540	ENST00000304414	ENSE00003527407	3	-
chr16_18809247_18810156	multiexon	RP11-1035H13.3-001	1	ENSG00000260342	ENST00000567078	ENSE00003490828	2	-	ENSG00000260342	ENST00000567078	ENSE00003544843	3	-
chr16_18830824_18839490	multiexon	SMG1-001	1	ENSG00000157106	ENST00000446231	ENSE00001646172	55	-	ENSG00000157106	ENST00000446231	ENSE00001201279	56	-
chr16_19234367_19236160	multiexon	SYT17-001	1	ENSG00000103528	ENST00000355377	ENSE00000675953	6	+	ENSG00000103528	ENST00000355377	ENSE00000675954	7	+
chr16_19474602_19475346	multiexon	TMC5-001	1	ENSG00000103534	ENST00000381414	ENSE00003638469	7	+	ENSG00000103534	ENST00000381414	ENSE00003497575	8	+
chr16_19741752_19745149	multiexon	IQCK-001	1	ENSG00000174628	ENST00000320394	ENSE00003603977	3	+	ENSG00000174628	ENST00000320394	ENSE00003655107	4	+
chr16_19744151_19745149	intronic	IQCK-001	1
chr16_20814118_20814992	multiexon	ERI2-001	1	ENSG00000196678	ENST00000300005	ENSE00003490396	2	-	ENSG00000196678	ENST00000300005	ENSE00003526583	4	-
chr16_20833084_20839859	multiexon	AC004381.6-001	1	ENSG00000005189	ENST00000261377	ENSE00003518373	6	+	ENSG00000005189	ENST00000261377	ENSE00003537565	11	+
chr16_20922505_20927036	multiexon	LYRM1-001	1	ENSG00000102897	ENST00000396052	ENSE00001523700	3	+	ENSG00000102897	ENST00000396052	ENSE00003635671	4	+
chr16_2106197_2108874	multiexon	TSC2-001	1	ENSG00000103197	ENST00000219476	ENSE00003672725	7	+	ENSG00000103197	ENST00000219476	ENSE00003508344	10	+
chr16_21326632_21328447	intronic	CRYM-AS1-001	1
chr16_21327205_21328447	putativeexon	CRYM-AS1-001	1	ENSG00000189149	ENST00000338573	ENSE00002087322	2	+	ENSG00000189149	ENST00000338573	ENSE00001734053	3	+
chr16_21350242_21363459	intergenic	CTD-2547E10.3-001	1
chr16_21623966_21636436	multiexon	METTL9-001	1	ENSG00000197006	ENST00000358154	ENSE00003551432	2	+	ENSG00000197006	ENST00000358154	ENSE00003472660	4	+
chr16_21629186_21629395	monoexon	METTL9-001	1	ENSG00000197006	ENST00000358154	ENSE00003518508	3	+
chr16_21629186_21636436	multiexon	METTL9-001	1	ENSG00000197006	ENST00000358154	ENSE00003518508	3	+	ENSG00000197006	ENST00000358154	ENSE00003472660	4	+
chr16_21979949_21987564	multiexon	UQCRC2-001	1	ENSG00000140740	ENST00000268379	ENSE00003540577	8	+	ENSG00000140740	ENST00000268379	ENSE00000944773	12	+
chr16_21982846_21987564	multiexon	UQCRC2-001	1	ENSG00000140740	ENST00000268379	ENSE00003491722	9	+	ENSG00000140740	ENST00000268379	ENSE00000944773	12	+
chr16_22236975_22237296	monoexon	EEF2K-001	1	ENSG00000103319	ENST00000263026	ENSE00001319534	2	+
chr16_22260076_22262643	multiexon	EEF2K-001	1	ENSG00000103319	ENST00000263026	ENSE00000676618	4	+	ENSG00000103319	ENST00000263026	ENSE00000676621	6	+
chr16_22360600_22361170	multiexon	CDR2-001	1	ENSG00000140743	ENST00000268383	ENSE00003529119	3	-	ENSG00000140743	ENST00000268383	ENSE00003680803	4	-
chr16_23091267_23093878	multiexon	USP31-001	1	ENSG00000103404	ENST00000219689	ENSE00003664760	12	-	ENSG00000103404	ENST00000219689	ENSE00000677549	13	-
chr16_23113640_23119504	multiexon	USP31-001	1	ENSG00000103404	ENST00000219689	ENSE00001367898	2	-	ENSG00000103404	ENST00000219689	ENSE00001366994	6	-
chr16_23113640_23120102	intronic	USP31-001	1
chr16_23424769_23428442	multiexon	COG7-001	1	ENSG00000168434	ENST00000307149	ENSE00001177155	9	-	ENSG00000168434	ENST00000307149	ENSE00003635741	10	-
chr16_23444866_23457282	multiexon	COG7-001	1	ENSG00000168434	ENST00000307149	ENSE00001177200	2	-	ENSG00000168434	ENST00000307149	ENSE00001177177	6	-
chr16_23573946_23578390	multiexon	UBFD1-001	1	ENSG00000103353	ENST00000395878	ENSE00003587216	5	+	ENSG00000103353	ENST00000395878	ENSE00003641344	6	+
chr16_23632683_23634451	multiexon	PALB2-001	1	ENSG00000083093	ENST00000261584	ENSE00003510579	9	-	ENSG00000083093	ENST00000261584	ENSE00003627364	10	-
chr16_23654276_23672602	multiexon	DCTN5-001	1	ENSG00000166847	ENST00000300087	ENSE00001107205	2	+	ENSG00000166847	ENST00000300087	ENSE00003491988	4	+
chr16_2369582_2369841	monoexon	ABCA3-001	1	ENSG00000167972	ENST00000301732	ENSE00003677838	8	-
chr16_2489354_2495623	multiexon	CCNF-001	1	ENSG00000162063	ENST00000397066	ENSE00003602964	7	+	ENSG00000162063	ENST00000397066	ENSE00003615645	10	+
chr16_249061_258187	multiexon	LUC7L-001	1	ENSG00000007392	ENST00000337351	ENSE00003527983	4	-	ENSG00000007392	ENST00000337351	ENSE00003469522	6	-
chr16_249061_270746	multiexon	LUC7L-001	1	ENSG00000007392	ENST00000337351	ENSE00003643311	3	-	ENSG00000007392	ENST00000337351	ENSE00003469522	6	-
chr16_24979672_24981901	multiexon	ARHGAP17-001	1	ENSG00000140750	ENST00000289968	ENSE00003509656	4	-	ENSG00000140750	ENST00000289968	ENSE00003631283	6	-
chr16_2498856_2499916	multiexon	CCNF-001	1	ENSG00000162063	ENST00000397066	ENSE00003584620	11	+	ENSG00000162063	ENST00000397066	ENSE00003602428	13	+
chr16_25162875_25170279	intronic	LCMT1-001	1
chr16_25162875_25172525	multiexon	LCMT1-001	1	ENSG00000205629	ENST00000399069	ENSE00003571132	5	+	ENSG00000205629	ENST00000399069	ENSE00003555731	6	+
chr16_25264267_25266713	multiexon	ZKSCAN2-001	1	ENSG00000155592	ENST00000328086	ENSE00003629723	2	-	ENSG00000155592	ENST00000328086	ENSE00003538871	3	-
chr16_27222467_27226329	intronic	KDM8-001	1
chr16_27224906_27226329	multiexon	KDM8-001	1	ENSG00000155666	ENST00000286096	ENSE00001139326	3	+	ENSG00000155666	ENST00000286096	ENSE00003485831	4	+
chr16_28112779_28113266	multiexon	XPO6-001	1	ENSG00000169180	ENST00000304658	ENSE00000894434	22	-	ENSG00000169180	ENST00000304658	ENSE00001240103	23	-
chr16_28123138_28137169	multiexon	XPO6-001	1	ENSG00000169180	ENST00000304658	ENSE00003596766	13	-	ENSG00000169180	ENST00000304658	ENSE00003623040	17	-
chr16_28157415_28167848	multiexon	XPO6-001	1	ENSG00000169180	ENST00000304658	ENSE00001240202	7	-	ENSG00000169180	ENST00000304658	ENSE00003480535	9	-
chr16_28157415_28181230	multiexon	XPO6-001	1	ENSG00000169180	ENST00000304658	ENSE00003530652	5	-	ENSG00000169180	ENST00000304658	ENSE00003480535	9	-
chr16_28163980_28167848	multiexon	XPO6-001	1	ENSG00000169180	ENST00000304658	ENSE00001240202	7	-	ENSG00000169180	ENST00000304658	ENSE00003657774	8	-
chr16_28498777_28500707	multiexon	CLN3-001	1	ENSG00000261832	ENST00000568224	ENSE00003562176	2	-	ENSG00000261832	ENST00000568224	ENSE00003588762	4	-
chr16_28619612_28620180	multiexon	SULT1A1-002	2	ENSG00000196502	ENST00000314752	ENSE00003559732	2	-	ENSG00000196502	ENST00000314752	ENSE00003661443	4	-
chr16_28967299_28970421	multiexon	NFATC2IP-001	1	ENSG00000176953	ENST00000320805	ENSE00003663131	4	+	ENSG00000176953	ENST00000320805	ENSE00001222324	7	+
chr16_28967299_28975360	putativeexon	NFATC2IP-001	1	ENSG00000176953	ENST00000320805	ENSE00003663131	4	+	ENSG00000176953	ENST00000320805	ENSE00001222368	8	+
chr16_28970038_28970421	multiexon	NFATC2IP-001	1	ENSG00000176953	ENST00000320805	ENSE00003672383	6	+	ENSG00000176953	ENST00000320805	ENSE00001222324	7	+
chr16_29323671_29339945	multiexon	RP11-231C14.6-001	1	ENSG00000260413	ENST00000569730	ENSE00003499573	1	+	ENSG00000260413	ENST00000569730	ENSE00003592090	4	+
chr16_29323671_29339945	multiexon	SNX29P2-001	1	ENSG00000198106	ENST00000604430	ENSE00003602225	3	+	ENSG00000198106	ENST00000604430	ENSE00003520977	6	+
chr16_29332249_29339945	multiexon	RP11-231C14.6-001	1	ENSG00000260413	ENST00000569730	ENSE00003659409	2	+	ENSG00000260413	ENST00000569730	ENSE00003592090	4	+
chr16_29332249_29339945	multiexon	SNX29P2-001	1	ENSG00000198106	ENST00000604430	ENSE00003581773	4	+	ENSG00000198106	ENST00000604430	ENSE00003520977	6	+
chr16_29906580_29907181	multiexon	SEZ6L2-001	1	ENSG00000174938	ENST00000350527	ENSE00001178561	4	-	ENSG00000174938	ENST00000350527	ENSE00003513834	5	-
chr16_29916173_29917280	putativeexon	ASPHD1-001	1	ENSG00000174939	ENST00000308748	ENSE00001178606	2	+	ENSG00000174939	ENST00000308748	ENSE00001902509	3	+
chr16_29916173_29917448	multiexon	ASPHD1-003	3	ENSG00000174939	ENST00000566693	ENSE00001178606	2	+	ENSG00000174939	ENST00000566693	ENSE00001780890	4	+
chr16_29917109_29917448	multiexon	ASPHD1-003	3	ENSG00000174939	ENST00000566693	ENSE00001693747	3	+	ENSG00000174939	ENST00000566693	ENSE00001780890	4	+
chr16_30715385_30715636	monoexon	SRCAP-001	1	ENSG00000080603	ENST00000262518	ENSE00001671306	4	+
chr16_30740287_30740893	multiexon	SRCAP-001	1	ENSG00000080603	ENST00000262518	ENSE00001028768	26	+	ENSG00000080603	ENST00000262518	ENSE00001028764	27	+
chr16_31102096_31102663	intronic	RP11-196G11.1-001	1
chr16_31733947_31734674	multiexon	ZNF720-001	1	ENSG00000197302	ENST00000316491	ENSE00003507484	2	+	ENSG00000197302	ENST00000316491	ENSE00003636005	3	+
chr16_354304_364683	multiexon	AXIN1-001	1	ENSG00000103126	ENST00000262320	ENSE00003576816	3	-	ENSG00000103126	ENST00000262320	ENSE00003669225	5	-
chr16_3690716_3693037	multiexon	DNASE1-006	6	ENSG00000213918	ENST00000570769	ENSE00002663504	2	+	ENSG00000213918	ENST00000570769	ENSE00002635982	3	+
chr16_3790400_3801807	multiexon	CREBBP-001	1	ENSG00000005339	ENST00000262367	ENSE00001592013	20	-	ENSG00000005339	ENST00000262367	ENSE00003544267	24	-
chr16_3841982_3843627	multiexon	CREBBP-001	1	ENSG00000005339	ENST00000262367	ENSE00001744566	4	-	ENSG00000005339	ENST00000262367	ENSE00001693899	5	-
chr16_3860604_3863122	intronic	CREBBP-001	1
chr16_3900298_3901010	monoexon	CREBBP-001	1	ENSG00000005339	ENST00000262367	ENSE00001789080	2	-
chr16_396148_397106	monoexon	AXIN1-001	1	ENSG00000103126	ENST00000262320	ENSE00001331290	2	-
chr16_4029117_4033441	multiexon	ADCY9-001	1	ENSG00000162104	ENST00000294016	ENSE00001101102	7	-	ENSG00000162104	ENST00000294016	ENSE00001101128	8	-
chr16_4382216_4383520	multiexon	GLIS2-001	1	ENSG00000126603	ENST00000262366	ENSE00000667397	3	+	ENSG00000126603	ENST00000262366	ENSE00000667389	4	+
chr16_4516154_4519466	multiexon	NMRAL1-001	1	ENSG00000153406	ENST00000283429	ENSE00003582307	3	-	ENSG00000153406	ENST00000283429	ENSE00003650496	4	-
chr16_46708226_46711310	multiexon	VPS35-001	1	ENSG00000069329	ENST00000299138	ENSE00003614117	7	-	ENSG00000069329	ENST00000299138	ENSE00003500189	10	-
chr16_46940754_46943839	multiexon	GPT2-001	1	ENSG00000166123	ENST00000340124	ENSE00001131371	5	+	ENSG00000166123	ENST00000340124	ENSE00001131363	6	+
chr16_47143394_47165936	multiexon	NETO2-001	1	ENSG00000171208	ENST00000562435	ENSE00001319075	2	-	ENSG00000171208	ENST00000562435	ENSE00001165245	7	-
chr16_47497810_47549512	multiexon	PHKB-003	3	ENSG00000102893	ENST00000566037	ENSE00002583816	2	+	ENSG00000102893	ENST00000566037	ENSE00003471588	7	+
chr16_47531310_47537001	multiexon	PHKB-001	1	ENSG00000102893	ENST00000299167	ENSE00003496924	2	+	ENSG00000102893	ENST00000299167	ENSE00003623463	4	+
chr16_47531310_47549512	multiexon	PHKB-001	1	ENSG00000102893	ENST00000299167	ENSE00003496924	2	+	ENSG00000102893	ENST00000299167	ENSE00003471588	6	+
chr16_47531310_47581459	multiexon	PHKB-001	1	ENSG00000102893	ENST00000299167	ENSE00003496924	2	+	ENSG00000102893	ENST00000299167	ENSE00003584924	7	+
chr16_47531310_47596406	intronic	PHKB-001	1
chr16_47531310_47630442	multiexon	PHKB-001	1	ENSG00000102893	ENST00000299167	ENSE00003496924	2	+	ENSG00000102893	ENST00000299167	ENSE00003482622	13	+
chr16_50321823_50322261	monoexon	ADCY7-001	1	ENSG00000121281	ENST00000394697	ENSE00002666645	2	+
chr16_511404_539000	multiexon	RAB11FIP3-001	1	ENSG00000090565	ENST00000262305	ENSE00001769445	2	+	ENSG00000090565	ENST00000262305	ENSE00000664307	5	+
chr16_521295_539000	multiexon	RAB11FIP3-001	1	ENSG00000090565	ENST00000262305	ENSE00001745300	3	+	ENSG00000090565	ENST00000262305	ENSE00000664307	5	+
chr16_53175091_53191453	intronic	CHD9-001	1
chr16_532525_546859	multiexon	RAB11FIP3-001	1	ENSG00000090565	ENST00000262305	ENSE00003516291	4	+	ENSG00000090565	ENST00000262305	ENSE00001246797	6	+
chr16_53301206_53302038	multiexon	CHD9-001	1	ENSG00000177200	ENST00000566029	ENSE00003634185	21	+	ENSG00000177200	ENST00000566029	ENSE00003566856	22	+
chr16_53907698_53913899	multiexon	FTO-001	1	ENSG00000140718	ENST00000471389	ENSE00003523757	5	+	ENSG00000140718	ENST00000471389	ENSE00003575733	6	+
chr16_53907698_53922863	multiexon	FTO-001	1	ENSG00000140718	ENST00000471389	ENSE00003523757	5	+	ENSG00000140718	ENST00000471389	ENSE00003604517	7	+
chr16_53907698_53968021	multiexon	FTO-001	1	ENSG00000140718	ENST00000471389	ENSE00003523757	5	+	ENSG00000140718	ENST00000471389	ENSE00003492841	8	+
chr16_56419831_56423287	multiexon	AMFR-001	1	ENSG00000159461	ENST00000290649	ENSE00001045783	9	-	ENSG00000159461	ENST00000290649	ENSE00003373462	10	-
chr16_56900982_56902284	multiexon	SLC12A3-001	1	ENSG00000070915	ENST00000438926	ENSE00000684699	2	+	ENSG00000070915	ENST00000438926	ENSE00000684718	3	+
chr16_56900985_56902284	putativeexon	SLC12A3-001	1	ENSG00000070915	ENST00000438926	ENSE00000684699	2	+	ENSG00000070915	ENST00000438926	ENSE00000684718	3	+
chr16_56906263_56906698	multiexon	SLC12A3-001	1	ENSG00000070915	ENST00000438926	ENSE00000335895	7	+	ENSG00000070915	ENST00000438926	ENSE00000852836	8	+
chr16_56973149_56974157	multiexon	HERPUD1-001	1	ENSG00000051108	ENST00000439977	ENSE00003614305	5	+	ENSG00000051108	ENST00000439977	ENSE00003483560	6	+
chr16_58593708_58594266	intronic	CNOT1-001	1
chr16_58608513_58609033	multiexon	CNOT1-001	1	ENSG00000125107	ENST00000317147	ENSE00003594949	15	-	ENSG00000125107	ENST00000317147	ENSE00001748964	16	-
chr16_58709844_58710250	multiexon	SLC38A7-001	1	ENSG00000103042	ENST00000219320	ENSE00003581857	7	-	ENSG00000103042	ENST00000219320	ENSE00003458608	8	-
chr16_58752100_58753159	multiexon	GOT2-001	1	ENSG00000125166	ENST00000245206	ENSE00003597918	4	-	ENSG00000125166	ENST00000245206	ENSE00003565077	6	-
chr16_58756054_58757806	multiexon	GOT2-001	1	ENSG00000125166	ENST00000245206	ENSE00003531906	2	-	ENSG00000125166	ENST00000245206	ENSE00003534318	3	-
chr16_66562897_66575856	multiexon	TK2-001	1	ENSG00000166548	ENST00000451102	ENSE00003537426	3	-	ENSG00000166548	ENST00000451102	ENSE00003680074	6	-
chr16_66632081_66632743	intergenic
chr16_66655965_66657405	multiexon	CMTM4-001	1	ENSG00000183723	ENST00000330687	ENSE00001310589	3	-	ENSG00000183723	ENST00000330687	ENSE00001336498	4	-
chr16_66655965_66670484	multiexon	CMTM4-001	1	ENSG00000183723	ENST00000330687	ENSE00001291387	2	-	ENSG00000183723	ENST00000330687	ENSE00001336498	4	-
chr16_66759731_66763002	multiexon	DYNC1LI2-001	1	ENSG00000135720	ENST00000258198	ENSE00003601174	9	-	ENSG00000135720	ENST00000258198	ENSE00003522244	12	-
chr16_66761591_66763002	multiexon	DYNC1LI2-001	1	ENSG00000135720	ENST00000258198	ENSE00003601174	9	-	ENSG00000135720	ENST00000258198	ENSE00003593463	11	-
chr16_66839680_66839929	multiexon	NAE1-001	1	ENSG00000159593	ENST00000290810	ENSE00001104192	18	-	ENSG00000159593	ENST00000290810	ENSE00003620149	19	-
chr16_66847467_66847749	multiexon	NAE1-001	1	ENSG00000159593	ENST00000290810	ENSE00003648181	12	-	ENSG00000159593	ENST00000290810	ENSE00001139961	13	-
chr16_66971940_66973261	multiexon	CES2-001	1	ENSG00000172831	ENST00000317091	ENSE00003469586	2	+	ENSG00000172831	ENST00000317091	ENSE00003519765	3	+
chr16_67070542_67116211	putativeexon	CBFB-001	1	ENSG00000067955	ENST00000290858	ENSE00003599426	3	+	ENSG00000067955	ENST00000290858	ENSE00001301640	5	+
chr16_67070542_67116242	multiexon	CBFB-001	1	ENSG00000067955	ENST00000290858	ENSE00003599426	3	+	ENSG00000067955	ENST00000290858	ENSE00001301640	5	+
chr16_67100585_67116242	multiexon	CBFB-001	1	ENSG00000067955	ENST00000290858	ENSE00003658049	4	+	ENSG00000067955	ENST00000290858	ENSE00001301640	5	+
chr16_67662273_67663436	multiexon	CTCF-001	1	ENSG00000102974	ENST00000264010	ENSE00001251143	9	+	ENSG00000102974	ENST00000264010	ENSE00000690303	10	+
chr16_67719360_67719705	monoexon	GFOD2-001	1	ENSG00000141098	ENST00000268797	ENSE00003529442	2	-
chr16_68059318_68083453	multiexon	DUS2-001	1	ENSG00000167264	ENST00000565263	ENSE00001516666	2	+	ENSG00000167264	ENST00000565263	ENSE00003626724	4	+
chr16_68090267_68105011	multiexon	DUS2-001	1	ENSG00000167264	ENST00000565263	ENSE00003528376	7	+	ENSG00000167264	ENST00000565263	ENSE00003579912	12	+
chr16_68155890_68160513	multiexon	NFATC3-001	1	ENSG00000072736	ENST00000349223	ENSE00003480086	2	+	ENSG00000072736	ENST00000349223	ENSE00003470743	3	+
chr16_68191772_68200918	multiexon	NFATC3-001	1	ENSG00000072736	ENST00000349223	ENSE00003555908	4	+	ENSG00000072736	ENST00000349223	ENSE00003523645	5	+
chr16_68191772_68217269	multiexon	NFATC3-001	1	ENSG00000072736	ENST00000349223	ENSE00003555908	4	+	ENSG00000072736	ENST00000349223	ENSE00003606547	8	+
chr16_68200746_68217269	multiexon	NFATC3-001	1	ENSG00000072736	ENST00000349223	ENSE00003523645	5	+	ENSG00000072736	ENST00000349223	ENSE00003606547	8	+
chr16_68300496_68309152	multiexon	SLC7A6-001	1	ENSG00000103064	ENST00000219343	ENSE00001399849	2	+	ENSG00000103064	ENST00000219343	ENSE00001310370	3	+
chr16_68308594_68309152	monoexon	SLC7A6-001	1	ENSG00000103064	ENST00000219343	ENSE00001310370	3	+
chr16_68893787_68896964	multiexon	TANGO6-001	1	ENSG00000103047	ENST00000261778	ENSE00003546296	2	+	ENSG00000103047	ENST00000261778	ENSE00003655292	3	+
chr16_68900982_68914533	multiexon	TANGO6-001	1	ENSG00000103047	ENST00000261778	ENSE00001111643	4	+	ENSG00000103047	ENST00000261778	ENSE00003641791	7	+
chr16_68934337_68961986	multiexon	TANGO6-001	1	ENSG00000103047	ENST00000261778	ENSE00003662500	8	+	ENSG00000103047	ENST00000261778	ENSE00000691111	13	+
chr16_69170599_69177292	multiexon	CIRH1A-001	1	ENSG00000141076	ENST00000314423	ENSE00003501950	3	+	ENSG00000141076	ENST00000314423	ENSE00003616932	6	+
chr16_69184440_69184807	multiexon	CIRH1A-001	1	ENSG00000141076	ENST00000314423	ENSE00003678127	7	+	ENSG00000141076	ENST00000314423	ENSE00000946481	8	+
chr16_69189774_69197081	multiexon	CIRH1A-001	1	ENSG00000141076	ENST00000314423	ENSE00000946484	11	+	ENSG00000141076	ENST00000314423	ENSE00002444457	14	+
chr16_69189774_69201088	multiexon	CIRH1A-001	1	ENSG00000141076	ENST00000314423	ENSE00000946484	11	+	ENSG00000141076	ENST00000314423	ENSE00001203664	16	+
chr16_69269651_69279718	multiexon	SNTB2-003	3	ENSG00000168807	ENST00000524887	ENSE00002197354	2	+	ENSG00000168807	ENST00000524887	ENSE00003556865	3	+
chr16_69279505_69294163	multiexon	SNTB2-001	1	ENSG00000168807	ENST00000336278	ENSE00003688808	2	+	ENSG00000168807	ENST00000336278	ENSE00001141172	3	+
chr16_69279505_69304188	multiexon	SNTB2-001	1	ENSG00000168807	ENST00000336278	ENSE00003688808	2	+	ENSG00000168807	ENST00000336278	ENSE00003536899	4	+
chr16_69317951_69318147	monoexon	SNTB2-001	1	ENSG00000168807	ENST00000336278	ENSE00003513511	5	+
chr16_69404386_69406258	multiexon	TERF2-001	1	ENSG00000132604	ENST00000254942	ENSE00003488502	4	-	ENSG00000132604	ENST00000254942	ENSE00003638095	5	-
chr16_69687139_69687331	monoexon	NFAT5-001	1	ENSG00000102908	ENST00000354436	ENSE00003543868	4	+
chr16_69729039_69729282	monoexon	NFAT5-001	1	ENSG00000102908	ENST00000354436	ENSE00003568009	13	+
chr16_69752026_69752437	multiexon	NQO1-001	1	ENSG00000181019	ENST00000320623	ENSE00003662302	2	-	ENSG00000181019	ENST00000320623	ENSE00001241515	3	-
chr16_69820899_69833198	multiexon	WWP2-001	1	ENSG00000198373	ENST00000359154	ENSE00003619900	2	+	ENSG00000198373	ENST00000359154	ENSE00003619260	4	+
chr16_70247564_70256383	intergenic	RP11-296I10.6-001	1
chr16_70346512_70350007	multiexon	DDX19B-001	1	ENSG00000157349	ENST00000288071	ENSE00003499660	2	+	ENSG00000157349	ENST00000288071	ENSE00003589407	4	+
[truncated: 5,201 more rows]
