# Supplementary material for: Docker4Circ: A Framework for the Reproducible Characterization of circRNAs from RNA-Seq Data
Source: Int J Mol Sci. 2019 Dec 31;21(1):293. doi: 10.3390/ijms21010293 (PMC6982331; doi:10.3390/ijms21010293)
Supplement: Supplementary file 1 [file ijms-21-00293-s001.zip › Supplementary_Table_5_CIRI_AS_results.xlsx]

## Sheet: SRR5889371_NCM460_rep1
circRNA_id	alternatively_spliced_exon	AS_type	psi_estimation_without_correction	psi_estimation_after_correction
1:10155519|10165802	10161166:10161253	A5SS,	1	n/a
1:16119332|16123438	16119332:16119550	A3SS,	1	n/a
1:21431610|21437876	21431610:21431751	A3SS,	1	n/a
1:197552282|197581106	197552282:197552383	A3SS,	1	n/a
1:225161793|225284941	225190485:225190629	ES,	1	n/a
1:233225807|233231609	233225807:233225936	A3SS,	1	n/a
1:235582732|235597595	235582732:235582876	A5SS,	1	n/a
1:235582788|235594119	235582788:235582876	A5SS,	1	n/a
10:7325866|7327916	7325866:7326112	A3SS,	1	n/a
10:35349802|35360267	35349802:35349896	A3SS,	1	n/a
10:74468041|74475660	74468041:74468114	A5SS,	1	n/a
10:76349040|76360251	76351518:76351561	ES,	1	n/a
10:102003455|102006692	102005556:102005670	A3SS,	1	n/a
10:124151819|124177484	124151819:124151888	A5SS,	1	n/a
11:66583524|66595835	66595737:66595835	A3SS,	1	n/a
11:85685751|85695016	85687666:85687725	ES,	1	n/a
12:28378728|28412375	28408514:28408595	ES,	1	n/a
12:28378728|28544344	28379073:28379132	ES,	1	n/a
12:63083479|63087779	63083763:63083912	ES,	1	n/a
12:120260624|120272032	120260624:120260777	A3SS,	1	n/a
12:122332645|122341013	122337540:122337762	A5SS,	1	n/a
13:96622366|96648389	96642227:96642327	ES,	1	n/a
13:113170754|113181798	113174200:113174335	A3SS,	1	n/a
13:113845186|113854830	113849385:113849439	A5SS,	1	n/a
14:31103153|31112611	31108983:31109070	A5SS,	1	n/a
14:32241022|32257079	32241871:32241977	A3SS,	1	n/a
14:35276657|35331528	35280141:35280238	ES,	1	n/a
14:97299804|97327072	97326894:97327072	A3SS,	1	n/a
15:43281017|43290463	43290390:43290463	A5SS,	1	n/a
15:56243574|56258744	56243574:56243612	A3SS,	1	n/a
15:56243574|56258744	56243709:56243787	A3SS,	1	n/a
15:61307997|61327125	61319075:61319201	ES,	1	n/a
15:89790860|89804074	89790860:89790962	A5SS,	1	n/a
15:94899366|94913409	94899366:94899530	A5SS,	1	n/a
16:1364021|1370518	1370175:1370284	ES,	1	n/a
16:11815433|11830089	11824501:11824630	ES,	1	n/a
16:23424769|23428442	23424769:23424885	A3SS,	1	n/a
16:25143723|25145611	25145403:25145611	A3SS,	1	n/a
16:69404386|69406258	69404386:69404532	A3SS,	1	n/a
16:83940592|83945972	83940592:83940704	A5SS,	1	n/a
17:4186093|4192703	4186093:4186216	A3SS,	1	n/a
17:4186093|4200104	4192525:4192703	A3SS,	1	n/a
17:4186093|4200104	4186093:4186216	A3SS,	1	n/a
17:4186093|4200109	4186093:4186216	A3SS,	1	n/a
17:4186093|4210418	4186093:4186216	A3SS,	1	n/a
17:18768782|18775962	18770595:18770647	ES,	1	n/a
17:29483001|29490394	29490204:29490394	A3SS,	1	n/a
17:29483001|29490394	29486028:29486111	A5SS,	1	n/a
17:29483001|29491097	29490204:29490394	A3SS,	1	n/a
17:29483001|29491097	29486028:29486111	A5SS,	1	n/a
17:42501717|42513913	42512433:42512519	A3SS,	1	n/a
17:53016285|53024673	53017109:53017159	ES,	1	n/a
17:57767997|57851246	57842332:57842499	A5SS,	1	n/a
17:57842332|57851305	57842332:57842499	A5SS,	1	n/a
17:57842332|57870047	57842332:57842499	A5SS,	1	n/a
17:64509454|64510584	64510457:64510584	A3SS,	1	n/a
17:80972330|80992975	80988634:80988778	ES,	1	n/a
19:3660964|3661999	3660964:3661081	A3SS,	1	n/a
2:58425714|58459247	58449077:58449177	A3SS,	1	n/a
2:58425729|58459247	58425729:58425797	A3SS,	1	n/a
2:58449077|58457009	58449077:58449177	A3SS,	1	n/a
2:86997146|86998835	86997146:86997248	A5SS,	1	n/a
2:120634899|120658382	120635040:120635118	A3SS,	1	n/a
2:149087529|149099905	149088052:149088169	A5SS,	1	n/a
2:169018297|169038600	169023809:169023917	A3SS,	1	n/a
2:176835492|176860374	176844538:176844596	ES,	1	n/a
2:177161588|177193640	177193602:177193640	A3SS,	1	n/a
2:183817133|183818059	183817841:183818059	A5SS,	1	n/a
2:183993015|183998351	183995146:183995253	A5SS,	1	n/a
2:228356263|228389631	228356263:228356356	A5SS,	1	n/a
20:7976673|7990962	7980379:7980507	A5SS,	1	n/a
20:33057853|33069011	33059249:33059320	A3SS,	1	n/a
20:47317291|47351187	47342827:47342928	ES,	1	n/a
3:4403723|4418073	4403723:4403938	A3SS,	1	n/a
3:33109722|33114205	33109722:33109782	A3SS,	1	n/a
3:33661095|33673866	33661095:33661230	A3SS,	1	n/a
3:33661095|33673866	33663627:33663772	A5SS,	1	n/a
3:101373548|101375092	101373548:101373665	A3SS,	1	n/a
3:149563798|149619949	149613260:149613357	A5SS,	1	n/a
3:149589816|149639014	149613260:149613357	A5SS,	1	n/a
3:196817783|196846401	196817783:196817897	A3SS,	1	n/a
4:17963526|17974508	17964593:17964672	ES,	1	n/a
4:26622235|26690029	26638838:26638907	A3SS,	1	n/a
4:88005272|88011222	88010733:88010842	A3SS,	1	n/a
4:89034455|89036210	89034455:89034705	A3SS,	1	n/a
4:148827789|148876525	148827789:148827870	A5SS,	1	n/a
4:148860976|148887990	148860976:148861050	A5SS,	1	n/a
4:151719233|151729550	151727423:151727556	A3SS,	1	n/a
5:6737623|6739965	6738796:6738842	A5SS,	1	n/a
5:6737623|6742710	6738796:6738842	A5SS,	1	n/a
5:65284463|65290692	65288538:65288735	A3SS,	1	n/a
5:65284463|65310553	65288538:65288735	A3SS,	1	n/a
5:76745585|76785397	76760586:76760634	ES,	1	n/a
5:111594926|111602027	111595588:111595676	A3SS,	1	n/a
5:111595588|111602027	111595588:111595676	A3SS,	1	n/a
5:132219032|132220811	132219032:132219252	A3SS,	1	n/a
6:37897735|37898352	37898141:37898352	A3SS,	1	n/a
6:99862448|99864304	99862448:99862566	A3SS,	1	n/a
6:106696025|106740981	106696025:106696119	A3SS,	1	n/a
6:106696025|106756366	106696025:106696119	A3SS,	1	n/a
6:106727536|106740981	106728090:106728124	ES,	1	n/a
6:108232550|108246136	108243001:108243113	A3SS,	1	n/a
6:108233920|108246136	108243001:108243113	A3SS,	1	n/a
6:108243001|108246136	108243001:108243113	A3SS,	1	n/a
6:108243001|108250718	108243001:108243113	A3SS,	1	n/a
6:110988637|111067404	111031762:111031857	ES,A3SS,	1	n/a
6:121624763|121631993	121624763:121624797	A3SS,	1	n/a
6:159001972|159010814	159004986:159005076	ES,	1	n/a
6:167435897|167438382	167435897:167436123	A5SS,	1	n/a
7:2269619|2270359	2269619:2269778	A3SS,	1	n/a
7:2269619|2270362	2269619:2269778	A3SS,	1	n/a
7:2269619|2270399	2269619:2269778	A3SS,	1	n/a
7:8095063|8110761	8095063:8095179	A5SS,	1	n/a
7:8095063|8110761	8099726:8099878	A3SS,	1	n/a
7:23435746|23458443	23455748:23455838	ES,	1	n/a
7:27668990|27672045	27668990:27669111	A3SS,	1	n/a
7:27668990|27672060	27668990:27669111	A3SS,	1	n/a
7:27668990|27689242	27668990:27669111	A3SS,	1	n/a
7:77407655|77408131	77407951:77408131	A3SS,	1	n/a
7:155471302|155473602	155473291:155473602	A3SS,	1	n/a
9:33971649|33973235	33971649:33971752	A3SS,	1	n/a
9:72347055|72356774	72355637:72355692	ES,	1	n/a
9:96819400|96827103	96819551:96819643	ES,	1	n/a
9:115024715|115060196	115024715:115024879	A3SS,	1	n/a
9:132838691|132845881	132839578:132839657	A5SS,	1	n/a
9:134312007|134314448	134312233:134312282	ES,	1	n/a
X:299339|302666	299339:299631	A3SS,	1	n/a
X:24190832|24197887	24197300:24197887	A3SS,	1	n/a
X:73494177|73501683	73500212:73500329	A5SS,	1	n/a
2:72945232|72960247	72960200:72960247	A5SS,	0.998	n/a
5:137320946|137324004	137323150:137323305	A3SS,	0.998	n/a
17:57842332|57851246	57842332:57842499	A5SS,	0.996	n/a
22:46085592|46114373	46098569:46098727	ES,	0.996	n/a
3:196118684|196129890	196120425:196120490	A5SS,	0.996	n/a
5:619105|620376	619105:619232	A5SS,	0.992	n/a
5:170305101|170323119	170305101:170305247	A5SS,	0.992	n/a
5:170305101|170323119	170308810:170308900	A3SS,	0.992	n/a
15:80412670|80415142	80414054:80414162	A3SS,	0.991	n/a
22:46085592|46114373	46096162:46096258	ES,	0.99	n/a
6:159004986|159010814	159010704:159010814	A3SS,	0.989	n/a
10:74468041|74475660	74474869:74474984	ES,	0.988	n/a
15:67524152|67529158	67528746:67528842	ES,	0.987	n/a
17:80858527|80869665	80861281:80861354	ES,	0.987	n/a
3:157839892|157841780	157841655:157841780	A3SS,	0.987	n/a
7:158580695|158591763	158586341:158586417	A5SS,	0.987	n/a
4:129913322|129925031	129920827:129920949	A3SS,	0.986	n/a
4:129913322|129925031	129924896:129925031	A5SS,	0.986	n/a
7:74119496|74133260	74131214:74131270	A3SS,	0.986	n/a
X:53672263|53681075	53674311:53674517	ES,	0.986	n/a
X:72797243|72804408	72798540:72798621	A3SS,	0.986	n/a
16:47531310|47549512	47533667:47533805	ES,	0.985	n/a
1:231090079|231097049	231090079:231090149	A3SS,	0.984	n/a
2:207144264|207162097	207161970:207162097	A3SS,	0.984	n/a
17:1746097|1747980	1747214:1747292	A5SS,	0.981	n/a
2:72945232|72960247	72958284:72958374	ES,A3SS,	0.979	n/a
1:42730786|42744343	42744019:42744343	IR,	0.978	n/a
4:78694235|78697546	78695684:78695870	A3SS,	0.978	n/a
X:80047353|80049271	80047353:80047451	A3SS,	0.978	n/a
3:138289160|138291826	138289876:138289999	A3SS,	0.977	n/a
10:7318854|7327916	7325866:7325921	A3SS,	0.976	n/a
6:87925621|87928449	87925621:87925775	A5SS,	0.976	n/a
7:158580695|158591763	158580695:158580784	A3SS,	0.976	n/a
17:29483001|29497015	29486028:29486111	A5SS,	0.974	n/a
17:29483001|29497015	29490204:29490394	A3SS,	0.974	n/a
2:148730308|148739650	148733471:148733544	ES,	0.974	n/a
3:4452549|4461830	4458812:4458926	A3SS,	0.974	n/a
4:7870349|7873807	7870349:7870446	A3SS,	0.974	n/a
9:74825603|74834422	74828802:74828907	A3SS,	0.973	n/a
22:25771780|25777545	25771780:25771975	A3SS,	0.972	n/a
2:148730308|148739650	148739497:148739650	A5SS,	0.971	n/a
3:145838899|145842016	145841052:145841112	ES,	0.97	n/a
5:95091100|95099324	95099212:95099324	A3SS,	0.97	n/a
2:207144264|207162097	207146525:207146633	ES,	0.969	n/a
7:152007051|152012423	152008883:152009031	A5SS,	0.969	n/a
8:141856359|141900868	141874411:141874498	ES,	0.969	n/a
12:102291641|102295211	102295069:102295211	A3SS,	0.968	n/a
12:102291641|102295211	102291641:102291708	A5SS,	0.968	n/a
14:61482622|61512885	61497163:61497241	ES,A3SS,	0.968	n/a
17:79937060|79943483	79937060:79937115	A5SS,	0.968	n/a
1:92798948|92846430	92798948:92799030	A5SS,	0.967	n/a
6:158994452|159010814	159004986:159005076	ES,	0.967	n/a
1:70766447|70781249	70779428:70779473	A3SS,	0.966	n/a
16:47531310|47549512	47536902:47537001	ES,	0.966	n/a
17:80842021|80861354	80858527:80858607	ES,	0.966	n/a
2:11426665|11428575	11426665:11426765	A3SS,	0.966	n/a
7:158566032|158591763	158586341:158586417	A3SS,	0.966	n/a
14:69583083|69589077	69584856:69584995	ES,	0.965	n/a
11:106849345|106856857	106849345:106849466	A3SS,	0.963	n/a
8:48196617|48206619	48206456:48206619	A3SS,	0.963	n/a
5:122881111|122893258	122888801:122888841	ES,	0.962	n/a
5:179688684|179707608	179688684:179688822	A3SS,	0.962	n/a
3:145838899|145842016	145839758:145839820	ES,	0.961	n/a
5:41794105|41807540	41803171:41803265	ES,	0.961	n/a
5:65284463|65310553	65307877:65307955	A5SS,	0.961	n/a
5:76745585|76760634	76747116:76747178	A3SS,	0.961	n/a
6:47471016|47472494	47471731:47471790	ES,	0.961	n/a
11:46515158|46534363	46529741:46529920	ES,	0.959	n/a
12:28458582|28460682	28458582:28458739	A5SS,	0.958	n/a
12:28458582|28460682	28459675:28459878	A3SS,	0.958	n/a
1:155691308|155695810	155691308:155691409	A5SS,	0.957	n/a
18:45391430|45396935	45395614:45395807	A3SS,	0.957	n/a
3:52946554|52950230	52946554:52946663	A3SS,	0.957	n/a
5:43675613|43704502	43704357:43704502	A3SS,	0.957	n/a
9:114148657|114154104	114152264:114152381	A3SS,	0.957	n/a
1:247318868|247323115	247318868:247318997	A3SS,	0.956	n/a
8:100286426|100287482	100287309:100287482	A3SS,	0.956	n/a
9:20819795|20823114	20820940:20821070	A5SS,	0.956	n/a
10:7285520|7327916	7325866:7325921	A3SS,	0.955	n/a
21:16386665|16415895	16387466:16387546	ES,	0.955	n/a
5:32268807|32276848	32270923:32271053	A5SS,	0.955	n/a
8:18656805|18662408	18658780:18658892	ES,A3SS,	0.955	n/a
11:46098305|46113774	46112006:46112117	ES,A3SS,	0.954	n/a
3:196831774|196846401	196842798:196842954	A3SS,	0.953	n/a
12:19615444|19626289	19615444:19615651	A5SS,	0.952	n/a
12:39154649|39170103	39161437:39161540	ES,	0.952	n/a
14:102506573|102507010	102506935:102507010	A3SS,	0.951	n/a
5:619105|620376	620184:620376	A3SS,	0.951	n/a
5:133534777|133541822	133536026:133536187	ES,	0.95	n/a
2:58311224|58316858	58312016:58312085	ES,	0.949	n/a
2:61505300|61508377	61507379:61507483	A3SS,	0.947	n/a
2:148730308|148739650	148731017:148731093	ES,A5SS,	0.947	n/a
22:30032740|30038274	30035079:30035201	ES,	0.946	n/a
12:70671912|70713144	70688017:70688074	A3SS,	0.944	n/a
17:1746097|1756483	1747214:1747292	A5SS,	0.944	n/a
2:228356263|228389631	228388479:228388641	A3SS,	0.944	n/a
5:41794105|41807540	41801124:41801172	ES,	0.943	n/a
2:207144264|207162097	207145274:207145317	ES,	0.941	n/a
3:196094899|196129890	196120425:196120490	A5SS,	0.941	n/a
5:179688684|179707608	179691781:179691839	ES,	0.941	n/a
12:46622936|46648719	46636983:46637097	ES,	0.939	n/a
8:18656805|18662408	18662032:18662112	A3SS,	0.939	n/a
1:212502477|212506940	212502477:212502673	A5SS,	0.938	n/a
14:71880665|71933964	71933764:71933964	A3SS,	0.935	n/a
10:74468041|74475660	74475612:74475660	A3SS,	0.934	n/a
1:6007164|6022009	6012760:6012896	ES,	0.933	n/a
6:24416625|24418806	24418312:24418464	A5SS,	0.933	n/a
12:19406874|19413955	19413883:19413955	A3SS,	0.929	n/a
16:89484692|89497734	89493175:89493477	ES,A3SS,	0.929	n/a
16:89484692|89497734	89497664:89497734	A5SS,	0.929	n/a
2:109463194|109473426	109473250:109473426	A3SS,	0.929	n/a
9:136277419|136278041	136277419:136277612	A3SS,	0.929	n/a
X:112291554|112293180	112291554:112291623	A5SS,	0.929	n/a
16:28112779|28113266	28112779:28113009	A3SS,	0.927	n/a
17:57808782|57816308	57814814:57814904	ES,	0.927	n/a
14:50941795|50971575	50942846:50942888	ES,	0.926	n/a
7:27668990|27689252	27668990:27669111	A3SS,	0.926	n/a
8:141889570|141900868	141900642:141900868	IR,	0.926	n/a
4:148867768|148887990	148886175:148886280	A3SS,	0.925	n/a
1:246490503|246498776	246493782:246493839	ES,	0.923	n/a
14:64144905|64150840	64144905:64145203	A3SS,	0.923	n/a
3:169854207|169867032	169863211:169863309	ES,	0.923	n/a
5:167915607|167921655	167920899:167921007	A5SS,	0.923	n/a
5:167915607|167921655	167921555:167921655	A3SS,	0.923	n/a
2:136505837|136519481	136511729:136511847	A3SS,	0.92	n/a
7:158580695|158591763	158581036:158581108	ES,A3SS,	0.92	n/a
5:38523521|38530768	38527257:38527396	A5SS,	0.919	n/a
5:38523521|38530768	38523521:38523684	A3SS,	0.919	n/a
3:196842798|196846401	196842798:196842954	A3SS,	0.918	n/a
10:5751493|5756170	5754357:5754502	ES,	0.917	n/a
13:96637493|96648389	96642227:96642327	ES,	0.917	n/a
14:50941795|50971575	50942977:50943024	ES,	0.917	n/a
14:99924616|99932150	99924616:99924872	A3SS,	0.917	n/a
15:51240217|51250991	51242248:51242366	A5SS,	0.917	n/a
2:78225204|78252550	78226102:78226166	ES,	0.917	n/a
6:30618771|30619243	30618771:30618877	A5SS,	0.917	n/a
5:38991051|39021238	38996921:38996984	ES,	0.914	n/a
14:69583083|69589077	69585911:69585947	A5SS,	0.913	n/a
15:76566753|76585041	76576098:76576166	ES,	0.913	n/a
5:170667932|170669824	170667932:170668146	A5SS,	0.913	n/a
12:124130002|124137282	124137079:124137108	A3SS,	0.909	n/a
14:71880665|71979562	71884847:71884913	A3SS,	0.909	n/a
4:1221987|1235307	1231971:1232125	ES,	0.909	n/a
5:10213603|10224173	10213603:10213722	A3SS,	0.909	n/a
5:130883740|130897740	130883740:130883883	A3SS,	0.909	n/a
7:11101418|11151094	11101418:11101468	A5SS,	0.909	n/a
18:18975346|18983955	18981111:18981287	ES,	0.905	n/a
1:246600450|246603426	246600450:246600513	A3SS,	0.902	n/a
2:122260743|122287901	122273241:122273338	ES,	0.902	n/a
22:28910745|28915308	28911615:28911704	ES,	0.901	n/a
10:34985246|34989132	34988988:34989132	A5SS,	0.9	n/a
12:29812813|29814312	29812813:29812916	A3SS,	0.9	n/a
13:113845186|113854830	113845186:113845289	A3SS,	0.9	n/a
2:136505837|136519481	136511109:136511137	ES,	0.9	n/a
2:197777606|197787849	197787822:197787849	A5SS,	0.9	n/a
21:45089765|45093836	45093751:45093836	A3SS,	0.9	n/a
5:79974746|80057497	80040325:80040434	ES,	0.9	n/a
2:61749746|61753656	61752405:61752468	ES,	0.896	n/a
3:183361268|183369064	183368084:183369064	IR,	0.896	n/a
14:61482622|61512885	61509865:61509930	ES,	0.895	n/a
2:128855003|128861588	128860653:128860719	ES,	0.895	n/a
22:46096162|46125470	46114293:46114373	ES,	0.895	n/a
3:47777524|47787483	47777524:47777616	A3SS,	0.895	n/a
6:20739750|20781496	20758826:20758874	ES,	0.895	n/a
X:67731691|67742759	67738612:67738654	ES,	0.895	n/a
7:33185854|33217203	33192313:33192463	A5SS,	0.894	n/a
10:52193236|52350007	52279591:52279681	ES,	0.893	n/a
11:78176922|78204241	78189631:78189729	ES,	0.892	n/a
10:74474869|74475660	74475520:74475660	A3SS,	0.891	n/a
15:90414707|90432372	90420538:90420656	ES,	0.891	n/a
17:4186093|4200109	4192525:4192703	A3SS,	0.891	n/a
13:61013822|61060082	61018817:61018882	A3SS,	0.889	n/a
14:50941795|50971575	50949079:50949134	ES,	0.889	n/a
18:59739906|59763183	59757709:59757811	ES,	0.889	n/a
7:103801520|103808973	103801520:103801630	A3SS,	0.889	n/a
6:159001972|159010814	159010704:159010814	A3SS,	0.885	n/a
7:99621042|99621930	99621042:99621555	IR,	0.884	n/a
X:106331666|106332069	106331666:106332069	IR,	0.884	n/a
10:93870833|93940776	93902786:93902875	ES,	0.882	n/a
12:129293333|129299615	129293941:129294018	A3SS,	0.882	n/a
15:49528048|49584734	49575763:49575915	ES,	0.882	n/a
5:76745585|76785397	76747116:76747178	ES,	0.879	n/a
14:102506573|102507010	102506573:102506747	A5SS,	0.878	n/a
1:235582788|235597595	235582788:235582876	A5SS,	0.875	n/a
1:245165423|245180628	245165423:245165614	A5SS,	0.875	n/a
12:109212025|109212334	109212212:109212334	A5SS,	0.875	n/a
14:31765115|31771725	31765115:31765196	A3SS,	0.875	n/a
15:59204762|59209198	59204762:59204809	A3SS,	0.875	n/a
22:48081949|48082955	48082298:48082444	A3SS,	0.875	n/a
5:137288317|137290065	137289025:137289154	A3SS,	0.875	n/a
6:36040650|36043739	36043625:36043739	A3SS,	0.875	n/a
3:11399892|11468400	11421446:11421526	ES,	0.872	n/a
1:44773982|44804994	44778841:44778900	ES,	0.87	n/a
1:44750507|44785416	44773982:44774073	ES,	0.869	n/a
10:99915850|99923154	99917220:99917330	ES,	0.867	n/a
12:122181535|122190129	122188286:122188345	A3SS,	0.867	n/a
15:49528048|49584734	49574184:49574282	ES,	0.867	n/a
16:16101673|16110478	16108348:16108485	ES,	0.867	n/a
19:23556544|23557566	23556544:23556639	A3SS,	0.867	n/a
3:3819409|3830758	3824187:3824385	ES,	0.867	n/a
3:56703728|56707753	56704101:56704173	ES,	0.867	n/a
10:74100547|74100928	74100547:74100626	A3SS,	0.864	n/a
11:128993341|129034322	128993783:128993824	ES,	0.862	n/a
7:158704241|158711560	158706924:158707012	A5SS,	0.862	n/a
3:32774915|32778982	32776292:32776468	ES,	0.859	n/a
1:225718256|225755116	225742608:225742785	A3SS,	0.857	n/a
1:245180544|245222760	245185471:245185598	ES,	0.857	n/a
16:16101673|16110478	16110353:16110478	A3SS,	0.857	n/a
16:27222467|27226329	27222467:27222538	A5SS,	0.857	n/a
2:228356263|228389631	228378565:228378828	ES,A3SS,	0.857	n/a
3:171830242|171944737	171851261:171851336	ES,	0.857	n/a
4:26638833|26690029	26640335:26640456	A3SS,	0.857	n/a
5:43700221|43704502	43702723:43702838	A3SS,	0.857	n/a
5:76745585|76785397	76745585:76745695	A3SS,	0.857	n/a
6:99860427|99864304	99862448:99862566	A3SS,	0.857	n/a
7:98988516|98988876	98988516:98988722	A5SS,	0.857	n/a
9:33953283|33963789	33956077:33956144	ES,	0.857	n/a
4:115380370|115412085	115406806:115406883	ES,	0.852	n/a
4:184114752|184130178	184129106:184129309	A3SS,	0.85	n/a
1:235582788|235597595	235590455:235590554	ES,	0.846	n/a
10:15875629|15889942	15880227:15880278	ES,	0.846	n/a
10:52193236|52350007	52226650:52226692	ES,	0.846	n/a
13:96622366|96648389	96636058:96636118	ES,	0.846	n/a
14:61482622|61512885	61504343:61504401	ES,	0.846	n/a
15:51204275|51223168	51207645:51207768	A3SS,	0.846	n/a
17:80842021|80869665	80863812:80863929	ES,	0.846	n/a
5:79974746|80057497	80037283:80037367	ES,	0.846	n/a
5:130883740|130940386	130897671:130897740	ES,	0.846	n/a
14:71880665|71933964	71884847:71884913	ES,	0.843	n/a
12:124130002|124137282	124132510:124132673	ES,	0.842	n/a
13:80094945|80113910	80107458:80107591	A3SS,	0.842	n/a
7:156758964|156759786	156758964:156759096	A5SS,	0.842	n/a
3:57875768|57882659	57881974:57882098	ES,	0.839	n/a
13:31789188|31803431	31797871:31797963	ES,	0.838	n/a
20:35236118|35238133	35236293:35236403	ES,	0.837	n/a
1:8568686|8674745	8601273:8601377	ES,	0.833	n/a
1:97235259|97236407	97235259:97235431	A5SS,	0.833	n/a
1:236332006|236347206	236341714:236341936	ES,	0.833	n/a
10:116719485|116734144	116731894:116732033	A3SS,	0.833	n/a
11:11895347|11901927	11895347:11895406	A5SS,	0.833	n/a
11:78176922|78189729	78189484:78189521	A3SS,	0.833	n/a
11:85966264|85968638	85966264:85966329	A5SS,	0.833	n/a
12:109212025|109217137	109212212:109212334	A5SS,	0.833	n/a
12:110628725|110630511	110630422:110630511	A3SS,	0.833	n/a
15:69728477|69729061	69728903:69729061	A3SS,	0.833	n/a
16:31733947|31734674	31734579:31734674	A3SS,	0.833	n/a
18:196637|199316	199202:199316	A3SS,	0.833	n/a
18:196637|199316	198047:198132	A5SS,	0.833	n/a
18:9588087|9588851	9588087:9588233	A3SS,	0.833	n/a
18:9588087|9588851	9588709:9588851	A5SS,	0.833	n/a
2:99786013|99787892	99787802:99787892	A5SS,	0.833	n/a
3:43591212|43607219	43596770:43596961	ES,	0.833	n/a
5:76745585|76759051	76747116:76747178	A3SS,	0.833	n/a
6:20480077|20481656	20481437:20481656	A3SS,	0.833	n/a
7:27668990|27689252	27671955:27672064	ES,A3SS,	0.833	n/a
7:148529726|148544397	148533914:148534092	ES,	0.833	n/a
X:16875717|16881223	16876799:16876972	A3SS,	0.833	n/a
4:148778704|148803083	148785997:148786107	A3SS,	0.824	n/a
1:51868107|51874004	51868107:51868197	A3SS,	0.818	n/a
16:21623966|21636436	21629186:21629395	A3SS,	0.818	n/a
20:37612342|37623523	37617436:37617560	A3SS,	0.818	n/a
9:119380603|119382722	119382589:119382722	A5SS,	0.818	n/a
21:38792601|38794954	38794884:38794954	A3SS,	0.812	n/a
10:518379|532470	530721:530888	ES,	0.806	n/a
11:128993341|128997200	128993783:128993824	ES,	0.806	n/a
1:41578955|41582682	41578955:41579198	A3SS,	0.8	n/a
1:212179981|212184763	212180592:212180741	A3SS,	0.8	n/a
10:70115110|70123870	70123347:70123441	A5SS,	0.8	n/a
11:85692788|85695016	85692915:85693046	A3SS,	0.8	n/a
13:100953714|100962162	100958005:100958088	ES,	0.8	n/a
14:61497163|61512885	61510168:61510221	ES,	0.8	n/a
16:22360600|22361170	22360600:22360764	A3SS,	0.8	n/a
17:47388674|47390207	47389289:47389404	A3SS,	0.8	n/a
19:17387304|17387718	17387632:17387718	A3SS,	0.8	n/a
2:197777606|197787849	197786827:197786910	ES,A3SS,	0.8	n/a
20:33954360|33971936	33971841:33971936	A5SS,	0.8	n/a
20:49518554|49535318	49535198:49535318	A5SS,	0.8	n/a
22:46085592|46136418	46085592:46085732	A5SS,	0.8	n/a
4:148886175|148887990	148887831:148887990	A3SS,	0.8	n/a
5:109049221|109065214	109051821:109051965	A3SS,	0.8	n/a
7:8095063|8110761	8110713:8110761	A3SS,	0.8	n/a
7:35707044|35712888	35709825:35709938	A3SS,	0.8	n/a
7:158528194|158531812	158529739:158529870	A3SS,	0.8	n/a
8:141840571|141900868	141889570:141889736	ES,	0.8	n/a
X:71681854|71708891	71681854:71681948	A3SS,	0.8	n/a
13:61013822|61041513	61018817:61018882	A3SS,	0.799	n/a
20:10536879|10541468	10541089:10541139	ES,	0.795	n/a
1:176132005|176153828	176132951:176133027	A5SS,	0.792	n/a
11:85707869|85714494	85711686:85711822	ES,	0.789	n/a
16:88008654|88017865	88008654:88008791	A5SS,	0.789	n/a
6:42941741|42942776	42941741:42941843	A3SS,	0.786	n/a
14:84112888|84132553	84117565:84117811	ES,A3SS,	0.784	n/a
1:197611841|197684204	197627430:197627499	ES,	0.778	n/a
11:66583524|66595835	66589114:66589235	ES,	0.778	n/a
11:120916383|120930794	120929054:120929180	A5SS,	0.778	n/a
13:113485689|113496693	113487174:113487337	ES,	0.778	n/a
15:36936479|36950106	36939770:36939859	ES,	0.778	n/a
15:56311594|56474308	56472714:56472765	ES,	0.778	n/a
15:93540187|93541851	93541379:93541491	ES,	0.778	n/a
17:59853762|59857762	59853762:59853863	A3SS,	0.778	n/a
21:16386665|16417644	16387466:16387546	ES,	0.778	n/a
9:33953283|33973235	33963724:33963789	ES,	0.778	n/a
X:46844285|46857679	46845114:46845193	ES,	0.778	n/a
X:130522991|130533678	130526918:130527048	ES,	0.778	n/a
11:12883797|12886447	12886233:12886447	IR,	0.772	n/a
14:31139462|31144271	31142463:31142553	A3SS,	0.767	n/a
1:146757975|146759412	146757975:146758177	A5SS,	0.765	n/a
10:15858834|15885271	15863655:15863725	ES,	0.765	n/a
15:30936842|30939917	30938317:30938498	A5SS,	0.765	n/a
9:36052262|36065621	36056907:36057010	ES,	0.765	n/a
X:1404671|1409402	1407652:1407781	ES,	0.765	n/a
X:67266836|67273652	67268258:67268299	ES,	0.758	n/a
1:23356962|23370979	23366752:23366927	ES,	0.75	n/a
1:51204535|51267349	51210356:51210447	ES,	0.75	n/a
11:9304918|9316934	9309989:9310089	A3SS,	0.75	n/a
11:120916383|120930794	120924260:120924441	A3SS,	0.75	n/a
12:28458582|28544344	28458582:28458739	A5SS,	0.75	n/a
12:29812813|29813818	29813562:29813637	ES,	0.75	n/a
12:32751431|32764217	32754212:32754357	A5SS,	0.75	n/a
13:113485689|113496693	113488903:113488974	ES,	0.75	n/a
14:61482622|61512885	61503777:61503859	ES,	0.75	n/a
15:94899366|94928754	94901776:94901841	A3SS,	0.75	n/a
16:21326632|21328447	21327228:21327291	A3SS,	0.75	n/a
17:4186093|4210418	4200012:4200109	ES,A3SS,	0.75	n/a
17:55674229|55693445	55693335:55693445	A3SS,	0.75	n/a
17:55674229|55693445	55674229:55674315	A5SS,	0.75	n/a
18:21644104|21663045	21660549:21660875	A5SS,	0.75	n/a
19:12790271|12791139	12790975:12791139	A5SS,	0.75	n/a
19:13039156|13039661	13039349:13039477	A5SS,	0.75	n/a
2:70451686|70456450	70452460:70452525	ES,	0.75	n/a
2:168869144|168873605	168872985:168873098	A3SS,	0.75	n/a
2:173435454|173460751	173460557:173460751	A3SS,	0.75	n/a
20:39896103|39897723	39897630:39897723	A5SS,	0.75	n/a
20:47591303|47592736	47591303:47591411	A5SS,	0.75	n/a
21:38844986|38853128	38850510:38850602	A3SS,	0.75	n/a
21:46536848|46554747	46538479:46538534	ES,	0.75	n/a
3:37315027|37330782	37327505:37327552	ES,	0.75	n/a
3:145820542|145842016	145841052:145841112	ES,	0.75	n/a
3:149563798|149639014	149613260:149613357	A5SS,	0.75	n/a
3:183465460|183470041	183469861:183470041	A3SS,	0.75	n/a
3:183465460|183470041	183465460:183465504	A5SS,	0.75	n/a
4:115380370|115412085	115404623:115404734	ES,	0.75	n/a
5:36211946|36227667	36219698:36219781	A5SS,	0.75	n/a
5:80063752|80074655	80064654:80064822	A3SS,	0.75	n/a
5:118842513|118850741	118845125:118845189	ES,	0.75	n/a
8:42780700|42785315	42783869:42783953	A5SS,	0.75	n/a
9:74838036|74842956	74842863:74842956	A3SS,	0.75	n/a
9:77631184|77632364	77631469:77631721	ES,	0.75	n/a
9:128305338|128348006	128321912:128322088	ES,	0.75	n/a
X:14868627|14877456	14871161:14871289	A5SS,	0.75	n/a
X:73494177|73513226	73500212:73500329	A5SS,	0.75	n/a
21:38792601|38802702	38794076:38794168	ES,	0.742	n/a
17:80842021|80869665	80861281:80861354	ES,	0.739	n/a
4:88005272|88012981	88010689:88010842	ES,A3SS,	0.739	n/a
17:80842021|80869665	80851423:80851508	ES,	0.737	n/a
14:92559596|92563182	92560090:92560175	ES,	0.733	n/a
7:22999875|23030758	23000854:23000941	ES,	0.733	n/a
7:101801840|101821937	101821749:101821937	A3SS,	0.733	n/a
12:111991962|111993723	111992670:111992878	A3SS,	0.732	n/a
21:38792601|38802702	38797992:38798083	ES,	0.732	n/a
2:234296903|234299129	234298575:234298687	ES,A3SS,	0.729	n/a
14:71880665|71996087	71884847:71884913	ES,A3SS,	0.728	n/a
18:2666156|2674144	2666869:2667030	A5SS,	0.727	n/a
1:247320302|247323115	247320302:247320519	A3SS,	0.725	n/a
8:141874411|141900868	141889570:141889736	ES,	0.725	n/a
17:80842021|80869665	80847544:80847573	ES,	0.722	n/a
2:44436349|44445676	44440835:44440896	ES,	0.721	n/a
6:150092298|150094305	150093150:150093383	ES,	0.721	n/a
1:36432556|36439112	36435728:36435820	A3SS,	0.714	n/a
1:200577958|200584737	200583446:200583533	ES,	0.714	n/a
1:212502477|212519275	212506839:212506940	A3SS,	0.714	n/a
1:212502477|212519275	212502477:212502673	A5SS,	0.714	n/a
1:235582732|235597595	235594020:235594119	ES,	0.714	n/a
12:95451329|95451654	95451329:95451419	A3SS,	0.714	n/a
13:52992127|53001354	52997709:52997774	ES,	0.714	n/a
13:61013822|61034674	61018817:61018882	A3SS,	0.714	n/a
14:76633006|76662315	76647107:76647192	ES,	0.714	n/a
16:89493175|89497734	89497664:89497734	A5SS,	0.714	n/a
2:225421012|225422573	225421012:225421161	A3SS,	0.714	n/a
3:197592294|197598333	197592983:197593090	ES,	0.714	n/a
4:152336876|152403800	152375853:152375960	ES,	0.714	n/a
5:111594926|111616020	111615965:111616020	A5SS,	0.714	n/a
8:141874411|141935848	141889570:141889736	ES,	0.714	n/a
12:112371690|112381173	112374496:112374634	ES,	0.706	n/a
11:78176922|78204241	78189484:78189521	ES,A3SS,	0.7	n/a
13:111274563|111279894	111277537:111277625	A5SS,	0.7	n/a
3:31917925|31921322	31920922:31921045	ES,	0.697	n/a
11:65269792|65272066	65271200:65271402	ES,	0.692	n/a
12:96688777|96694138	96692647:96692761	ES,	0.692	n/a
12:70193989|70195501	70193989:70194117	A5SS,	0.685	n/a
2:242343243|242357524	242346952:242347030	ES,	0.684	n/a
1:9991949|9994918	9994820:9994918	A5SS,	0.683	n/a
1:92798948|92829327	92798948:92799030	A5SS,	0.682	n/a
21:40600426|40601362	40601040:40601145	ES,	0.682	n/a
1:28116073|28120143	28119821:28119880	ES,	0.667	n/a
1:42730786|42789498	42789355:42789498	A5SS,	0.667	n/a
1:164776779|164790863	164781227:164781275	A5SS,	0.667	n/a
1:197611841|197643299	197641167:197641286	A3SS,	0.667	n/a
1:220355599|220356273	220356060:220356273	A5SS,	0.667	n/a
1:220355599|220356273	220355599:220355696	A3SS,	0.667	n/a
11:9308002|9316934	9309249:9309307	A3SS,	0.667	n/a
11:18305342|18307006	18305342:18305448	A3SS,	0.667	n/a
12:27199091|27219159	27217209:27217429	A5SS,	0.667	n/a
12:27521195|27533337	27529279:27529349	A5SS,	0.667	n/a
17:5314023|5320002	5317329:5317399	A3SS,	0.667	n/a
17:55607037|55693445	55674229:55674315	A5SS,	0.667	n/a
17:55607037|55693445	55693335:55693445	A3SS,	0.667	n/a
17:58756814|58767122	58766293:58766407	ES,	0.667	n/a
17:80851423|80861354	80858527:80858607	A3SS,	0.667	n/a
2:10784446|10808849	10794607:10794673	ES,	0.667	n/a
2:120690000|120704150	120703917:120704000	ES,	0.667	n/a
2:240078348|240085619	240081748:240081844	ES,	0.667	n/a
20:47788996|47790806	47788996:47789138	A3SS,	0.667	n/a
22:29120965|29121355	29121231:29121355	A5SS,	0.667	n/a
22:29120965|29121355	29120965:29121112	A3SS,	0.667	n/a
22:40948110|40990739	40982037:40982116	ES,	0.667	n/a
22:46085592|46136418	46125363:46125470	A3SS,	0.667	n/a
22:46493806|46505788	46505644:46505788	A3SS,	0.667	n/a
3:11643307|11744521	11743588:11743732	ES,	0.667	n/a
3:15253611|15262488	15262288:15262488	A3SS,	0.667	n/a
3:52988333|53003274	52996225:52996271	ES,	0.667	n/a
3:57569625|57570191	57569625:57569734	A3SS,	0.667	n/a
5:76621364|76633140	76627171:76627284	A3SS,	0.667	n/a
7:74119496|74131270	74129177:74129236	ES,	0.667	n/a
9:74823141|74834422	74823141:74823254	A5SS,	0.667	n/a
X:1404671|1409402	1407412:1407535	ES,	0.667	n/a
12:28378728|28412375	28379073:28379132	ES,	0.664	n/a
13:33091994|33101669	33101545:33101669	A5SS,	0.662	n/a
1:247319708|247323115	247319708:247320519	A3SS,	0.652	n/a
1:70758071|70781249	70779428:70779473	ES,	0.65	n/a
12:70671912|70704797	70688017:70688074	A3SS,	0.65	n/a
1:179955304|179961356	179959642:179959756	ES,	0.647	n/a
1:233313548|233344435	233335900:233336010	ES,	0.647	n/a
12:19498776|19501453	19500041:19500116	ES,	0.647	n/a
5:109049221|109051965	109051861:109051965	A3SS,	0.647	n/a
1:197621365|197684204	197627430:197627499	ES,	0.644	n/a
19:4941540|4941943	4941540:4941943	IR,	0.641	n/a
11:86778736|86868448	86802404:86802437	ES,	0.636	n/a
17:46189393|46190763	46189393:46189447	A5SS,	0.636	n/a
9:123945208|123955697	123954449:123954502	ES,	0.636	n/a
5:41794105|41807540	41805669:41805783	A5SS,	0.633	n/a
12:109046048|109048186	109046814:109046957	ES,A3SS,	0.63	n/a
12:100598718|100601564	100599454:100599522	A5SS,	0.625	n/a
15:72300167|72320134	72311380:72311436	ES,	0.625	n/a
17:44143903|44172067	44159807:44159908	ES,A3SS,	0.625	n/a
7:8043538|8110761	8110551:8110761	A3SS,	0.625	n/a
11:85692788|85707972	85701293:85701442	ES,	0.619	n/a
20:50290692|50307358	50305603:50305678	ES,	0.619	n/a
3:141811903|141820683	141811903:141811969	A3SS,	0.619	n/a
6:42559889|42562042	42560599:42560730	ES,	0.619	n/a
9:100839200|100840629	100840344:100840629	A3SS,	0.615	n/a
5:179688684|179707608	179706796:179707036	ES,	0.606	n/a
1:31413998|31414970	31414473:31414514	ES,	0.6	n/a
1:70758071|70771973	70759187:70759303	ES,	0.6	n/a
1:117957335|117984947	117983937:117984132	ES,	0.6	n/a
1:176132005|176145143	176132963:176133027	A5SS,	0.6	n/a
1:212190228|212194554	212194063:212194096	ES,	0.6	n/a
1:246599247|246603426	246600450:246600565	A3SS,	0.6	n/a
10:93940720|93952393	93952303:93952393	A5SS,	0.6	n/a
10:96201653|96204296	96204228:96204296	A3SS,	0.6	n/a
11:20424465|20429578	20426424:20426529	ES,	0.6	n/a
11:33065296|33076271	33076143:33076271	A3SS,	0.6	n/a
11:85692172|85695016	85692915:85693031	A3SS,	0.6	n/a
12:32751431|32755251	32754212:32754268	A5SS,	0.6	n/a
12:32863863|32871697	32866143:32866305	ES,	0.6	n/a
15:73052748|73067438	73064124:73064186	ES,	0.6	n/a
15:75215989|75221573	75219107:75219228	ES,	0.6	n/a
16:53175091|53191453	53188359:53188455	ES,	0.6	n/a
17:2139786|2148013	2142909:2143006	ES,	0.6	n/a
19:18648411|18649246	18649026:18649246	A5SS,	0.6	n/a
2:39519914|39536660	39530215:39530258	ES,	0.6	n/a
2:120885264|120903865	120900579:120900707	ES,	0.6	n/a
2:240078348|240085619	240081478:240081622	ES,	0.6	n/a
20:18491466|18492926	18492869:18492926	A3SS,	0.6	n/a
21:34717552|34721849	34721397:34721596	A3SS,	0.6	n/a
22:46085592|46125470	46098569:46098727	A3SS,	0.6	n/a
5:37221426|37224694	37221426:37221523	A3SS,	0.6	n/a
5:74109665|74137504	74109665:74109712	A3SS,	0.6	n/a
5:92889467|92899169	92890833:92890929	A3SS,	0.6	n/a
6:24416625|24418806	24418689:24418806	A3SS,	0.6	n/a
6:117010483|117026323	117013218:117013319	ES,	0.6	n/a
7:16720926|16729531	16725530:16725665	ES,	0.6	n/a
7:33390831|33427756	33397467:33397607	A3SS,	0.6	n/a
7:44714010|44721447	44714777:44714867	A3SS,	0.6	n/a
7:50771518|50823753	50799969:50800065	ES,	0.6	n/a
7:95838150|95864229	95854687:95854832	ES,	0.6	n/a
7:156516806|156619438	156556363:156556489	ES,	0.6	n/a
8:67986478|67988816	67987041:67987158	ES,	0.6	n/a
9:115024715|115060196	115060112:115060196	A5SS,	0.6	n/a
9:129796710|129831635	129812322:129812411	ES,	0.6	n/a
17:80842021|80869665	80858527:80858607	ES,	0.583	n/a
2:18825436|18869594	18826494:18826571	ES,	0.583	n/a
22:28910745|28915308	28913144:28913267	ES,	0.582	n/a
17:4192525|4200109	4192525:4192703	A3SS,	0.579	n/a
18:19116003|19148055	19146107:19146167	ES,	0.579	n/a
7:50771518|50778687	50772837:50773020	ES,	0.579	n/a
11:85685751|85695016	85692915:85693031	A3SS,	0.574	n/a
1:31452909|31455487	31452909:31453025	A3SS,	0.571	n/a
1:42730786|42776781	42744019:42744343	A3SS,	0.571	n/a
1:220771673|220792097	220772912:220772958	ES,	0.571	n/a
11:47505005|47506075	47505937:47506075	A5SS,	0.571	n/a
18:2666156|2674144	2673280:2673362	ES,	0.571	n/a
21:16386665|16415891	16387466:16387546	ES,	0.571	n/a
5:136794690|136795421	136795309:136795421	A5SS,	0.571	n/a
5:137342679|137347634	137347457:137347634	A5SS,	0.571	n/a
8:141810558|141900868	141810558:141810765	A3SS,	0.571	n/a
9:79852918|79853302	79852918:79853302	IR,	0.569	n/a
X:24190832|24197887	24193506:24193560	ES,	0.568	n/a
2:32399132|32409407	32402546:32402665	ES,	0.565	n/a
2:78225204|78252550	78225606:78225671	ES,	0.565	n/a
10:114286846|114298089	114296362:114296460	ES,	0.556	n/a
11:85707869|85742653	85737334:85737409	ES,	0.556	n/a
12:27521195|27533337	27530374:27530497	ES,	0.556	n/a
12:29812813|29814312	29813562:29813637	ES,	0.556	n/a
12:109210814|109217137	109212208:109212334	A5SS,	0.556	n/a
14:32241022|32257079	32244932:32245041	ES,	0.556	n/a
15:43164809|43170882	43164809:43164956	A3SS,	0.556	n/a
17:79027468|79031767	79030203:79030279	ES,	0.556	n/a
18:56363598|56367823	56365481:56365653	ES,	0.556	n/a
2:114486978|114493435	114489161:114489225	ES,	0.556	n/a
20:13509080|13550233	13539655:13539761	ES,	0.556	n/a
22:46085592|46136418	46088876:46088958	ES,	0.556	n/a
3:136432300|136434434	136432300:136432421	A3SS,	0.556	n/a
3:182804481|182810333	182805063:182805201	ES,	0.556	n/a
5:80299960|80338802	80303607:80303829	ES,	0.556	n/a
1:155695173|155695810	155695173:155695810	IR,	0.551	n/a
1:155891166|155891709	155891166:155891419	A3SS,	0.545	n/a
12:129293333|129299615	129294488:129294598	ES,	0.545	n/a
8:56854414|56860282	56854414:56854487	A5SS,	0.545	n/a
8:141828376|141900868	141900764:141900868	A5SS,	0.545	n/a
3:36524484|36527741	36527255:36527417	ES,A3SS,	0.538	n/a
8:141810558|141900868	141813642:141813749	ES,	0.538	n/a
15:25650608|25660989	25660862:25660989	A5SS,	0.533	n/a
14:39620950|39628754	39623415:39623498	ES,	0.529	n/a
15:25650608|25657118	25655801:25655852	ES,	0.529	n/a
22:46085592|46136418	46096162:46096258	ES,	0.529	n/a
12:39223181|39242464	39241715:39241777	ES,	0.524	n/a
20:57014001|57016139	57014202:57014364	ES,	0.524	n/a
8:141828376|141900868	141874411:141874498	ES,	0.52	n/a
21:38792601|38802702	38801169:38801210	ES,	0.518	n/a
4:36212012|36216102	36214018:36214109	A3SS,	0.515	n/a
2:153431650|153437563	153432783:153432889	ES,	0.514	n/a
2:225400245|225422573	225421012:225421137	ES,A3SS,	0.509	n/a
2:240929491|240946787	240939600:240939804	ES,	0.509	n/a
1:8555123|8674745	8601273:8601377	ES,	0.5	n/a
1:21415631|21437876	21431610:21431751	ES,A3SS,	0.5	n/a
1:231081135|231097049	231090079:231090149	A3SS,	0.5	n/a
1:231081135|231097049	231090079:231090124	A3SS,	0.5	n/a
1:231081135|231097049	231092167:231092228	ES,A3SS,	0.5	n/a
1:235582788|235597595	235594020:235594119	ES,A3SS,	0.5	n/a
10:93754292|93768032	93756126:93756327	ES,	0.5	n/a
10:116730127|116734144	116731910:116732033	A3SS,	0.5	n/a
10:116730127|116734144	116731894:116732033	A3SS,	0.5	n/a
10:126727566|126799662	126776760:126776888	ES,	0.5	n/a
10:128806996|128817099	128810496:128810638	A3SS,	0.5	n/a
10:128806996|128817099	128810559:128810638	A3SS,	0.5	n/a
11:47508302|47510576	47510335:47510576	A5SS,	0.5	n/a
11:47508302|47510576	47510389:47510576	A5SS,	0.5	n/a
11:78189484|78204241	78189484:78189516	A3SS,	0.5	n/a
11:78189484|78204241	78189484:78189521	A3SS,	0.5	n/a
11:85692788|85707972	85692915:85693031	A3SS,	0.5	n/a
11:85692788|85707972	85692915:85693046	A3SS,	0.5	n/a
12:11181000|11199787	11187381:11187484	ES,	0.5	n/a
12:28408514|28412375	28408514:28409011	IR,	0.5	n/a
12:28408514|28460682	28458582:28458739	A5SS,	0.5	n/a
12:28408514|28460682	28458582:28458712	A5SS,	0.5	n/a
12:29812813|29814312	29814251:29814312	A5SS,	0.5	n/a
12:29812813|29814312	29814247:29814312	A5SS,	0.5	n/a
12:51442817|51451911	51449927:51450028	ES,	0.5	n/a
12:58339411|58347472	58345541:58345678	A3SS,	0.5	n/a
12:58339411|58347472	58345545:58345678	A3SS,	0.5	n/a
13:33054727|33101669	33101595:33101669	A5SS,	0.5	n/a
13:33054727|33101669	33101545:33101669	A5SS,	0.5	n/a
13:100909849|100925600	100925450:100925600	A3SS,	0.5	n/a
13:100909849|100925600	100925512:100925600	A3SS,	0.5	n/a
13:114164553|114175048	114170358:114170422	ES,	0.5	n/a
14:71880665|71970385	71884847:71884913	ES,	0.5	n/a
15:70982793|70991999	70983638:70983702	ES,	0.5	n/a
15:76566753|76585041	76577991:76578079	A5SS,	0.5	n/a
15:76566753|76585041	76577978:76578079	A5SS,	0.5	n/a
15:94899366|94945248	94901776:94901841	A3SS,	0.5	n/a
15:94899366|94945248	94901711:94901841	A3SS,	0.5	n/a
16:16108348|16130460	16110353:16110478	ES,	0.5	n/a
18:45391430|45423180	45395614:45395807	A3SS,	0.5	n/a
18:45391430|45423180	45395614:45395841	A3SS,	0.5	n/a
19:45871888|45872405	45872188:45872405	IR,	0.5	n/a
2:186946057|186964557	186951028:186951097	ES,	0.5	n/a
2:228356263|228388641	228388595:228388641	A3SS,	0.5	n/a
2:228356263|228388641	228388479:228388641	A3SS,	0.5	n/a
21:46536848|46548488	46540709:46540874	ES,	0.5	n/a
21:46548317|46554747	46553474:46553580	ES,	0.5	n/a
22:47287162|47325531	47325396:47325531	A3SS,	0.5	n/a
22:47287162|47325531	47325367:47325531	A3SS,	0.5	n/a
3:3178944|3182332	3178944:3179137	A5SS,	0.5	n/a
3:3178944|3182332	3178944:3179157	A5SS,	0.5	n/a
3:11850991|11871338	11858666:11858811	ES,	0.5	n/a
3:47545820|47552716	47547406:47547512	ES,	0.5	n/a
3:50150816|50151684	50151383:50151532	ES,	0.5	n/a
4:40829149|40832594	40831575:40831658	ES,	0.5	n/a
4:54280782|54294350	54294194:54294350	A3SS,	0.5	n/a
4:54280782|54294350	54294264:54294350	A3SS,	0.5	n/a
4:184815820|184820106	184819336:184819446	ES,	0.5	n/a
7:23015829|23023664	23016312:23016427	ES,	0.5	n/a
7:30363258|30366113	30365975:30366113	A3SS,	0.5	n/a
7:30363258|30366113	30365923:30366113	A3SS,	0.5	n/a
7:44465499|44467302	44465499:44465878	A3SS,	0.5	n/a
8:25126361|25136181	25135932:25136181	A3SS,	0.5	n/a
8:25126361|25136181	25136085:25136181	A3SS,	0.5	n/a
8:27987019|27989921	27989317:27989427	ES,	0.5	n/a
8:48955593|48962538	48960690:48960744	ES,	0.5	n/a
9:111843119|111870850	111868788:111868889	ES,	0.5	n/a
9:114332371|114348445	114337014:114337118	A3SS,	0.5	n/a
9:114332371|114348445	114341076:114341231	A5SS,	0.5	n/a
9:114332371|114348445	114337014:114337122	A3SS,	0.5	n/a
9:114332371|114348445	114341072:114341231	A5SS,	0.5	n/a
X:76845304|76851255	76849166:76849319	A3SS,	0.5	n/a
X:76845304|76851255	76849166:76849253	A3SS,	0.5	n/a
5:138614016|138614818	138614254:138614429	ES,	0.488	n/a
4:36212012|36216102	36214018:36214076	A3SS,	0.485	n/a
19:5047487|5082515	5071021:5071070	ES,	0.484	n/a
12:116668338|116675510	116674626:116674695	ES,	0.483	n/a
8:141856359|141900868	141889570:141889736	ES,	0.482	n/a
14:76642966|76662315	76644551:76644665	ES,	0.474	n/a
19:3660964|3661999	3661371:3661524	ES,	0.474	n/a
X:71681854|71684581	71682212:71682292	ES,	0.474	n/a
1:197611841|197643299	197627430:197627499	ES,	0.467	n/a
15:25650608|25660989	25660857:25660989	A5SS,	0.467	n/a
5:81460218|81474406	81461297:81461409	A5SS,	0.467	n/a
9:97041040|97055351	97049013:97049094	ES,	0.467	n/a
10:15858834|15889942	15863655:15863725	ES,	0.464	n/a
2:9419446|9437574	9427133:9427241	ES,	0.462	n/a
1:63944435|63955889	63952240:63952444	ES,A5SS,	0.458	n/a
12:116668338|116675510	116669864:116669961	ES,	0.458	n/a
12:28378728|28412375	28408935:28409011	ES,	0.456	n/a
1:155891166|155891709	155891166:155891318	A3SS,	0.455	n/a
1:235643370|235658138	235652473:235652573	ES,A3SS,	0.455	n/a
10:12442015|12445368	12442720:12442884	ES,	0.455	n/a
10:93940720|93952393	93946042:93946139	ES,	0.455	n/a
12:22646157|22659753	22650513:22650561	ES,	0.455	n/a
8:56854414|56860282	56854414:56854550	A5SS,	0.455	n/a
8:141828376|141900868	141900642:141900868	A5SS,	0.455	n/a
11:61133517|61135470	61134900:61134997	ES,A3SS,	0.449	n/a
12:72163580|72167802	72165885:72166008	ES,	0.448	n/a
12:109210814|109217137	109212212:109212334	A5SS,	0.444	n/a
14:61509865|61512885	61510168:61510221	ES,	0.444	n/a
15:43164809|43170882	43164809:43164894	A3SS,	0.444	n/a
2:223752548|223773868	223765392:223765498	ES,	0.444	n/a
3:136432300|136434434	136432300:136432397	A3SS,	0.444	n/a
8:37623044|37623873	37623044:37623264	IR,	0.443	n/a
10:69726440|69773943	69748420:69748592	ES,	0.442	n/a
X:17491184|17495443	17492067:17492148	ES,	0.44	n/a
1:231090079|231097049	231092167:231092228	ES,A3SS,	0.437	n/a
1:51926763|51930998	51929679:51929736	ES,	0.433	n/a
1:31452909|31455487	31452909:31453010	A3SS,	0.429	n/a
1:46531726|46546422	46532583:46532636	ES,	0.429	n/a
1:176118142|176153828	176132963:176133027	ES,	0.429	n/a
1:225355641|225373127	225355869:225355978	ES,	0.429	n/a
11:47505005|47506075	47505941:47506075	A5SS,	0.429	n/a
11:86267595|86270865	86268994:86269035	ES,A3SS,	0.429	n/a
12:20076132|20097478	20088701:20088767	ES,	0.429	n/a
14:71880665|72043304	71884847:71884913	ES,	0.429	n/a
15:42851537|42856055	42852980:42853068	ES,	0.429	n/a
2:173426948|173429801	173427469:173427528	ES,	0.429	n/a
20:56993267|57009761	57006515:57006573	ES,	0.429	n/a
3:196118684|196134264	196129823:196129890	ES,	0.429	n/a
4:77045802|77065626	77051809:77051902	ES,	0.429	n/a
5:136794690|136795421	136795354:136795421	A5SS,	0.429	n/a
5:137342679|137347634	137347465:137347634	A5SS,	0.429	n/a
8:128152989|128186609	128176683:128176771	ES,	0.429	n/a
8:141810558|141900868	141810558:141810675	A3SS,	0.429	n/a
9:74533341|74562028	74556721:74556850	ES,	0.429	n/a
9:97686268|97718297	97690707:97690813	ES,	0.429	n/a
9:115013209|115060196	115038124:115038293	ES,	0.429	n/a
X:24106649|24110696	24110217:24110330	ES,	0.429	n/a
11:85685751|85695016	85692915:85693046	A3SS,	0.426	n/a
17:4192525|4200109	4192525:4192662	A3SS,	0.421	n/a
5:41794105|41807540	41794779:41794851	ES,	0.421	n/a
21:38792601|38845182	38794076:38794168	ES,	0.419	n/a
4:79747191|79772210	79768342:79768423	ES,	0.417	n/a
17:19843026|19850818	19844200:19844323	ES,	0.412	n/a
17:58756814|58786686	58766293:58766348	ES,	0.412	n/a
12:65720606|65762806	65753285:65753422	ES,A5SS,	0.405	n/a
1:21415631|21464301	21437816:21437876	ES,	0.4	n/a
1:176132005|176145143	176132951:176133027	A5SS,	0.4	n/a
1:246599247|246603426	246600450:246600513	A3SS,	0.4	n/a
10:93940720|93952393	93952234:93952393	A5SS,	0.4	n/a
10:96201653|96204296	96204203:96204296	A3SS,	0.4	n/a
10:96207392|96234540	96211315:96211366	ES,	0.4	n/a
11:33065296|33076271	33076139:33076271	A3SS,	0.4	n/a
11:85692172|85695016	85692915:85693046	A3SS,	0.4	n/a
12:32751431|32755251	32754212:32754357	A5SS,	0.4	n/a
13:45725822|45781640	45769477:45769650	ES,	0.4	n/a
17:53108529|53124515	53120973:53121031	ES,	0.4	n/a
19:18648411|18649246	18648985:18649246	A5SS,	0.4	n/a
2:45773871|45789895	45778264:45778421	ES,	0.4	n/a
2:72945232|72948293	72947189:72947257	ES,	0.4	n/a
20:18491466|18492926	18492873:18492926	A3SS,	0.4	n/a
21:34717552|34721849	34721412:34721596	A3SS,	0.4	n/a
22:46085592|46125470	46098647:46098727	A3SS,	0.4	n/a
3:110863746|110866331	110866086:110866117	ES,	0.4	n/a
4:83799883|83802075	83801815:83801864	ES,	0.4	n/a
5:37221426|37224694	37221426:37221590	A3SS,	0.4	n/a
5:74109665|74137504	74109665:74109844	A3SS,	0.4	n/a
5:92889467|92899169	92890833:92890907	A3SS,	0.4	n/a
6:24416625|24418806	24418599:24418806	A3SS,	0.4	n/a
7:22999875|23030758	23004034:23004150	ES,	0.4	n/a
7:33390831|33427756	33397527:33397607	A3SS,	0.4	n/a
7:44714010|44721447	44714744:44714867	A3SS,	0.4	n/a
8:42761316|42785315	42783869:42783953	ES,	0.4	n/a
9:115024715|115060196	115060121:115060196	A5SS,	0.4	n/a
1:230798887|230807386	230807005:230807150	ES,	0.391	n/a
1:245165423|245180628	245180184:245180281	ES,	0.391	n/a
1:1192372|1192690	1192372:1192690	IR,	0.385	n/a
1:21377359|21437876	21415631:21415706	ES,	0.385	n/a
2:175779786|175816930	175805544:175805622	ES,	0.385	n/a
4:7844866|7870446	7857193:7857301	ES,	0.385	n/a
X:122820398|122846758	122837304:122837355	ES,	0.385	n/a
3:141811903|141820683	141811903:141812285	A3SS,	0.381	n/a
5:37243115|37247847	37244477:37244709	ES,	0.379	n/a
12:65720606|65762806	65753285:65753482	ES,A5SS,	0.378	n/a
11:9308002|9321248	9309989:9310043	A3SS,	0.375	n/a
11:9308002|9321248	9309989:9310089	A3SS,	0.375	n/a
12:100598718|100601564	100599454:100599535	A5SS,	0.375	n/a
21:33825620|33840156	33829908:33830028	ES,	0.375	n/a
7:8043538|8110761	8110713:8110761	A3SS,	0.375	n/a
5:41794105|41807540	41805724:41805783	A5SS,	0.367	n/a
10:69726440|69773943	69749968:69750066	ES,	0.364	n/a
3:43591212|43607219	43592964:43593080	ES,A3SS,	0.364	n/a
14:61482622|61512885	61510168:61510221	ES,	0.36	n/a
9:100839200|100840629	100840048:100840168	ES,	0.36	n/a
12:120995085|120995485	120995085:120995485	IR,	0.353	n/a
5:109049221|109051965	109051821:109051965	A3SS,	0.353	n/a
12:70671912|70704797	70687851:70688074	A3SS,	0.35	n/a
1:247319708|247323115	247319708:247320705	A3SS,	0.348	n/a
15:90414707|90432372	90421497:90421532	ES,	0.345	n/a
14:71880665|71996087	71970329:71970385	ES,	0.341	n/a
13:33091994|33101669	33101595:33101669	A5SS,	0.338	n/a
1:42730786|42789498	42789430:42789498	A5SS,	0.333	n/a
1:51204535|51267349	51218110:51218195	ES,	0.333	n/a
1:78324623|78329713	78324999:78325071	ES,	0.333	n/a
1:164776779|164790863	164781227:164781386	A5SS,	0.333	n/a
1:167935867|167944253	167936987:167937111	ES,	0.333	n/a
1:176118142|176153828	176132005:176132124	ES,	0.333	n/a
1:197611841|197643299	197641167:197641276	A3SS,	0.333	n/a
1:220355599|220356273	220355599:220355692	A3SS,	0.333	n/a
1:220355599|220356273	220356056:220356273	A5SS,	0.333	n/a
10:96211315|96234540	96230752:96230801	ES,	0.333	n/a
11:9308002|9316934	9309249:9309353	A3SS,	0.333	n/a
11:18305342|18307006	18305342:18305503	A3SS,	0.333	n/a
11:20448312|20486092	20470384:20470471	ES,	0.333	n/a
11:46837749|46842819	46839861:46840054	ES,	0.333	n/a
12:11126254|11273779	11187381:11187484	ES,	0.333	n/a
12:27199091|27219159	27217209:27217387	A5SS,	0.333	n/a
12:27521195|27533337	27529279:27529320	A5SS,	0.333	n/a
12:31648744|31652605	31650055:31650109	ES,	0.333	n/a
12:47497896|47501947	47499831:47499907	ES,	0.333	n/a
13:88113179|88130872	88129625:88129743	ES,	0.333	n/a
15:23049082|23062319	23060815:23060905	ES,	0.333	n/a
17:5314023|5320002	5317329:5317454	A3SS,	0.333	n/a
17:55607037|55693445	55693331:55693445	A3SS,	0.333	n/a
17:55607037|55693445	55674229:55674311	A5SS,	0.333	n/a
17:59821793|59857762	59856034:59856139	ES,	0.333	n/a
17:80851423|80861354	80858472:80858607	A3SS,	0.333	n/a
19:9767223|9771550	9768901:9768965	ES,	0.333	n/a
2:32422413|32434630	32429659:32429761	ES,	0.333	n/a
2:39526884|39542529	39535084:39535146	ES,	0.333	n/a
20:47788996|47790806	47788996:47789093	A3SS,	0.333	n/a
21:44949638|45033828	45016682:45016760	ES,	0.333	n/a
22:29120965|29121355	29120965:29121108	A3SS,	0.333	n/a
22:29120965|29121355	29121227:29121355	A5SS,	0.333	n/a
22:30353025|30375041	30367301:30367350	ES,	0.333	n/a
22:46085592|46136418	46125305:46125470	A3SS,	0.333	n/a
22:46493806|46505788	46505551:46505788	A3SS,	0.333	n/a
3:15253611|15262488	15262293:15262488	A3SS,	0.333	n/a
3:57569625|57570191	57569625:57569759	A3SS,	0.333	n/a
3:182804481|182810333	182808724:182808819	ES,	0.333	n/a
4:83799883|83803093	83801815:83801864	ES,	0.333	n/a
5:76621364|76633140	76627227:76627284	A3SS,	0.333	n/a
5:127800417|127866386	127863565:127863660	ES,	0.333	n/a
6:3737313|3739395	3739030:3739203	ES,	0.333	n/a
7:74119496|74131270	74129443:74129486	ES,	0.333	n/a
7:156516806|156619438	156555802:156555870	ES,	0.333	n/a
8:19442677|19459376	19457281:19457330	ES,	0.333	n/a
8:62531537|62557191	62546242:62546286	ES,	0.333	n/a
9:33953283|33960876	33956077:33956144	ES,	0.333	n/a
9:74810416|74817658	74812378:74812463	ES,	0.333	n/a
9:74823141|74834422	74823141:74823210	A5SS,	0.333	n/a
9:123945208|123955697	123952832:123953009	ES,	0.333	n/a
9:125047448|125054119	125048136:125048225	ES,	0.333	n/a
14:71970329|71996087	71995416:71995457	ES,	0.326	n/a
1:225273412|225284941	225275728:225275831	ES,	0.32	n/a
17:59853762|59857762	59855481:59855540	ES,	0.319	n/a
1:92798948|92829327	92798948:92799018	A5SS,	0.318	n/a
12:70193989|70195501	70193989:70194112	A5SS,	0.315	n/a
21:38792601|38845182	38802571:38802702	ES,	0.314	n/a
11:128993341|129034322	128997107:128997200	ES,	0.312	n/a
17:44143903|44172067	44159807:44159843	ES,A3SS,	0.312	n/a
9:95018962|95022516	95020086:95020268	ES,	0.308	n/a
3:142455221|142467302	142462327:142462428	ES,	0.301	n/a
9:102677460|102691125	102684484:102684577	ES,	0.301	n/a
13:111274563|111279894	111277537:111277650	A5SS,	0.3	n/a
21:38792601|38801210	38794884:38794954	ES,	0.3	n/a
5:132219032|132220811	132219811:132219880	ES,	0.3	n/a
2:201881714|201888762	201886782:201886837	ES,	0.294	n/a
20:30954187|30989835	30959581:30959677	ES,	0.29	n/a
4:85818064|85853516	85822401:85822532	ES,	0.29	n/a
1:36432556|36439112	36435778:36435820	A3SS,	0.286	n/a
1:42730786|42776781	42744019:42744455	A3SS,	0.286	n/a
1:212502477|212519275	212502477:212502612	A5SS,	0.286	n/a
1:212502477|212519275	212506874:212506940	A3SS,	0.286	n/a
1:231079552|231097049	231092167:231092228	ES,A3SS,	0.286	n/a
12:95451329|95451654	95451329:95451411	A3SS,	0.286	n/a
13:61013822|61034674	61018821:61018882	A3SS,	0.286	n/a
14:61482622|61512885	61500737:61500831	ES,	0.286	n/a
16:89493175|89497734	89497660:89497734	A5SS,	0.286	n/a
2:225421012|225422573	225421012:225421106	A3SS,	0.286	n/a
4:85800559|85853516	85822401:85822532	ES,	0.286	n/a
5:111594926|111616020	111615969:111616020	A5SS,	0.286	n/a
12:19615444|19626289	19619682:19619784	ES,	0.282	n/a
1:225140372|225195246	225161793:225161855	ES,	0.28	n/a
15:25650608|25657118	25653767:25653831	ES,A3SS,	0.278	n/a
15:25650608|25657118	25653767:25653849	ES,A3SS,	0.278	n/a
14:62188227|62188541	62188227:62188541	IR,	0.277	n/a
1:247320302|247323115	247320302:247320423	A3SS,	0.275	n/a
1:235643370|235658138	235652473:235652657	ES,A3SS,	0.273	n/a
10:96207392|96234540	96218237:96218352	ES,	0.273	n/a
18:2666156|2674144	2666869:2666912	A5SS,	0.273	n/a
18:46889531|46918015	46917755:46917821	ES,	0.273	n/a
3:54353932|54420801	54418247:54418332	ES,	0.273	n/a
1:23356962|23377013	23370920:23370979	ES,	0.269	n/a
12:111991962|111993723	111992670:111992873	A3SS,	0.268	n/a
5:81460218|81474406	81461297:81461380	A5SS,	0.267	n/a
5:81460218|81474406	81461297:81461359	A5SS,	0.267	n/a
7:101801840|101821937	101821755:101821937	A3SS,	0.267	n/a
2:64083440|64085070	64084684:64084852	ES,	0.265	n/a
13:31789188|31803431	31799005:31799056	ES,	0.263	n/a
18:76953183|76974038	76964748:76964874	ES,	0.263	n/a
3:195101738|195133645	195131436:195131738	ES,	0.261	n/a
6:150092298|150094305	150093691:150093820	ES,	0.259	n/a
1:51253672|51323669	51320014:51320160	ES,	0.25	n/a
1:197641167|197643299	197642905:197642977	ES,	0.25	n/a
1:198201683|198233365	198222170:198222310	ES,	0.25	n/a
1:213277796|213290752	213281511:213281579	ES,	0.25	n/a
11:9304918|9316934	9309989:9310082	A3SS,	0.25	n/a
11:9308002|9321248	9309989:9310082	A3SS,	0.25	n/a
11:120916383|120930794	120924339:120924441	A3SS,	0.25	n/a
12:28458582|28544344	28458582:28458712	A5SS,	0.25	n/a
12:32751431|32764217	32754212:32754268	A5SS,	0.25	n/a
12:72051306|72054207	72052410:72052511	ES,	0.25	n/a
14:61497163|61512885	61500737:61500831	ES,	0.25	n/a
15:94899366|94928754	94901711:94901841	A3SS,	0.25	n/a
16:21326632|21328447	21327205:21327291	A3SS,	0.25	n/a
17:55674229|55693445	55693331:55693445	A3SS,	0.25	n/a
17:55674229|55693445	55674229:55674311	A5SS,	0.25	n/a
17:81006347|81006661	81006347:81006661	IR,	0.25	n/a
18:21644104|21663045	21660549:21660737	A5SS,	0.25	n/a
19:12790271|12791139	12791010:12791139	A5SS,	0.25	n/a
19:13039156|13039661	13039387:13039477	A5SS,	0.25	n/a
2:168869144|168873605	168872985:168873157	A3SS,	0.25	n/a
2:173435454|173460751	173460542:173460751	A3SS,	0.25	n/a
20:39896103|39897723	39897619:39897723	A5SS,	0.25	n/a
20:47591303|47592736	47591303:47591379	A5SS,	0.25	n/a
21:38844986|38853128	38850483:38850602	A3SS,	0.25	n/a
3:149563798|149639014	149613260:149613347	A5SS,	0.25	n/a
3:183465460|183470041	183469865:183470041	A3SS,	0.25	n/a
3:183465460|183470041	183465460:183465508	A5SS,	0.25	n/a
4:85818064|85853516	85833405:85833472	ES,	0.25	n/a
5:36211946|36227667	36219708:36219781	A5SS,	0.25	n/a
5:80063752|80074655	80064712:80064822	A3SS,	0.25	n/a
7:44465499|44467302	44465499:44465790	A3SS,	0.25	n/a
7:44465499|44467302	44465499:44465752	A3SS,	0.25	n/a
7:47520701|47568745	47551915:47552023	ES,A3SS,	0.25	n/a
7:47520701|47568745	47551915:47552046	ES,A3SS,	0.25	n/a
8:19442677|19459376	19445387:19445483	ES,A3SS,	0.25	n/a
8:19442677|19459376	19445387:19445534	ES,A3SS,	0.25	n/a
8:42780700|42785315	42783869:42784003	A5SS,	0.25	n/a
9:26861064|26884883	26866632:26866778	ES,	0.25	n/a
9:74838036|74842956	74842859:74842956	A3SS,	0.25	n/a
X:14868627|14877456	14871155:14871289	A5SS,	0.25	n/a
X:73494177|73513226	73500229:73500329	A5SS,	0.25	n/a
15:25650608|25660989	25652214:25652284	ES,	0.246	n/a
2:207144264|207162097	207156738:207156840	ES,A3SS,	0.245	n/a
1:9991949|9994918	9994830:9994918	A5SS,	0.244	n/a
14:71970329|71996087	71970545:71970663	ES,	0.243	n/a
20:35236118|35238133	35236118:35236403	IR,	0.243	n/a
1:108724563|108728576	108727765:108727892	ES,A5SS,	0.241	n/a
21:38792601|38794954	38794076:38794168	ES,	0.241	n/a
7:104678573|104681470	104679600:104679716	ES,	0.241	n/a
11:36103203|36120011	36103775:36103877	ES,	0.238	n/a
2:24787164|24807429	24795035:24795101	ES,	0.238	n/a
1:146757975|146759412	146757975:146758173	A5SS,	0.235	n/a
15:30936842|30939917	30938317:30938532	A5SS,	0.235	n/a
13:31789188|31803431	31797578:31797650	ES,	0.233	n/a
14:31139462|31144271	31142441:31142553	A3SS,	0.233	n/a
11:76670023|76709865	76708250:76708317	ES,	0.231	n/a
20:49518554|49535318	49519422:49519553	ES,	0.231	n/a
3:36524484|36527741	36527286:36527417	ES,A3SS,	0.231	n/a
6:137015278|137019820	137017089:137017195	ES,	0.231	n/a
9:100839200|100840629	100840475:100840629	A3SS,	0.231	n/a
17:46189393|46190763	46189393:46189473	A5SS,	0.227	n/a
11:120916383|120930794	120929054:120929169	A5SS,	0.222	n/a
13:31789188|31803431	31802109:31802251	ES,	0.222	n/a
17:59853762|59857762	59853762:59853923	A3SS,	0.222	n/a
3:141811903|141820683	141820066:141820188	ES,	0.222	n/a
X:57148369|57255532	57154177:57154235	ES,	0.222	n/a
9:102677460|102691125	102678331:102678450	ES,	0.221	n/a
1:21415631|21437876	21424708:21424870	ES,	0.219	n/a
10:96201653|96234540	96207392:96207427	ES,	0.218	n/a
1:61798184|61824946	61813591:61813674	ES,	0.217	n/a
2:109463194|109473426	109467091:109467211	ES,	0.217	n/a
12:116668238|116675510	116674626:116674695	ES,	0.214	n/a
6:42941741|42942776	42941741:42941824	A3SS,	0.214	n/a
X:71681854|71684581	71683326:71683396	ES,	0.214	n/a
13:96665561|96684225	96683153:96683205	ES,	0.212	n/a
16:88008654|88017865	88008654:88008813	A5SS,	0.211	n/a
1:176132005|176153828	176132963:176133027	A5SS,	0.208	n/a
13:61013822|61041513	61018821:61018882	A3SS,	0.201	n/a
1:32495899|32498935	32497125:32497241	ES,	0.2	n/a
1:41578955|41582682	41578955:41579225	A3SS,	0.2	n/a
1:42730786|42789498	42783764:42783827	ES,	0.2	n/a
1:164776779|164790863	164789309:164789421	ES,	0.2	n/a
1:212179981|212184763	212180592:212180791	A3SS,	0.2	n/a
1:235582788|235597595	235594076:235594119	ES,A3SS,	0.2	n/a
10:70115110|70123870	70123296:70123441	A5SS,	0.2	n/a
11:85692788|85695016	85692915:85693031	A3SS,	0.2	n/a
11:85722073|85742653	85737334:85737409	ES,	0.2	n/a
13:36857606|36869994	36860873:36860944	ES,	0.2	n/a
13:37614542|37625720	37621483:37621545	ES,	0.2	n/a
14:71880665|72043304	71970329:71970385	ES,	0.2	n/a
14:91409422|91413894	91413268:91413413	ES,	0.2	n/a
16:22360600|22361170	22360600:22360787	A3SS,	0.2	n/a
17:18768782|18793190	18770595:18770647	ES,	0.2	n/a
17:47388674|47390207	47389289:47389392	A3SS,	0.2	n/a
18:76886267|76967012	76936813:76936907	ES,	0.2	n/a
19:17387304|17387718	17387604:17387718	A3SS,	0.2	n/a
2:122260743|122286356	122273241:122273338	ES,	0.2	n/a
2:197777606|197787849	197786827:197786919	ES,A3SS,	0.2	n/a
2:240929491|240954277	240945165:240945258	ES,	0.2	n/a
20:33954360|33971936	33971860:33971936	A5SS,	0.2	n/a
20:49518554|49535318	49535276:49535318	A5SS,	0.2	n/a
22:46085592|46136418	46085592:46085783	A5SS,	0.2	n/a
22:46085592|46136418	46114293:46114373	ES,	0.2	n/a
3:29781211|29804480	29799390:29799493	ES,	0.2	n/a
3:37315027|37330782	37323449:37323763	ES,	0.2	n/a
3:67797195|67818857	67800838:67801084	ES,	0.2	n/a
3:71348971|71542706	71384311:71384428	ES,	0.2	n/a
4:120381338|120384134	120382872:120383006	ES,	0.2	n/a
4:148886175|148887990	148887806:148887990	A3SS,	0.2	n/a
5:107521818|107684231	107679667:107679727	ES,	0.2	n/a
5:109049221|109065214	109051861:109051965	A3SS,	0.2	n/a
5:137713409|137717279	137717040:137717103	ES,	0.2	n/a
5:176562088|176619020	176596395:176596429	ES,	0.2	n/a
6:42559889|42562042	42560248:42560352	ES,	0.2	n/a
7:8095063|8110761	8110551:8110761	A3SS,	0.2	n/a
7:35707044|35712888	35709825:35709934	A3SS,	0.2	n/a
7:156516806|156619438	156520624:156520701	ES,	0.2	n/a
7:158528194|158531812	158529739:158529808	A3SS,	0.2	n/a
8:27987019|27995408	27989317:27989427	ES,	0.2	n/a
X:71681854|71708891	71681854:71681952	A3SS,	0.2	n/a
7:27668990|27689252	27688167:27688263	ES,	0.197	n/a
21:38792601|38794954	38794878:38794954	A3SS,	0.188	n/a
10:61592283|61612460	61608911:61609100	ES,	0.185	n/a
12:64456697|64458999	64458409:64458513	ES,	0.185	n/a
11:102076624|102080295	102077663:102077722	ES,	0.184	n/a
1:51868107|51874004	51868107:51868193	A3SS,	0.182	n/a
12:27149675|27152609	27151762:27151880	ES,	0.182	n/a
15:25650608|25657118	25652214:25652284	ES,A3SS,	0.182	n/a
16:21623966|21636436	21629287:21629395	A3SS,	0.182	n/a
20:37612342|37623523	37617456:37617560	A3SS,	0.182	n/a
4:115380370|115412085	115407309:115407389	ES,	0.182	n/a
9:119380603|119382722	119382585:119382722	A5SS,	0.182	n/a
22:50810449|50832564	50830296:50830444	ES,A3SS,	0.179	n/a
14:50941795|50971575	50952587:50952630	ES,	0.176	n/a
16:14173147|14234617	14186578:14186739	ES,	0.176	n/a
4:148778704|148803083	148786018:148786107	A3SS,	0.176	n/a
2:18825436|18869594	18846290:18846381	ES,	0.172	n/a
2:240929491|240946787	240942466:240942553	ES,A3SS,	0.172	n/a
9:74817487|74834422	74823141:74823210	ES,A5SS,	0.171	n/a
12:116534474|116549317	116547579:116547674	ES,	0.17	n/a
1:231090079|231097049	231092167:231092306	ES,A3SS,	0.169	n/a
1:52289336|52299842	52290959:52291054	ES,	0.167	n/a
1:97235259|97236407	97235259:97235390	A5SS,	0.167	n/a
10:27815757|27822923	27820458:27820544	ES,	0.167	n/a
10:116719485|116734144	116731910:116732033	A3SS,	0.167	n/a
11:11895347|11901927	11895347:11895462	A5SS,	0.167	n/a
11:78176922|78189729	78189484:78189516	A3SS,	0.167	n/a
11:85966264|85968638	85966264:85966507	A5SS,	0.167	n/a
11:86778736|86802437	86783945:86784012	ES,A5SS,	0.167	n/a
12:109212025|109217137	109212208:109212334	A5SS,	0.167	n/a
12:110628725|110630511	110630395:110630511	A3SS,	0.167	n/a
15:69728477|69729061	69728932:69729061	A3SS,	0.167	n/a
16:31733947|31734674	31734382:31734674	A3SS,	0.167	n/a
18:196637|199316	198047:198215	A5SS,	0.167	n/a
18:196637|199316	199193:199316	A3SS,	0.167	n/a
18:9588087|9588851	9588087:9588222	A3SS,	0.167	n/a
18:9588087|9588851	9588730:9588851	A5SS,	0.167	n/a
2:99786013|99787892	99787806:99787892	A5SS,	0.167	n/a
21:16386665|16417644	16412684:16412737	ES,	0.167	n/a
4:20711306|20729020	20726431:20726511	ES,	0.167	n/a
5:76745585|76759051	76747116:76747171	A3SS,	0.167	n/a
6:20480077|20481656	20481455:20481656	A3SS,	0.167	n/a
X:16875717|16881223	16876799:16876945	A3SS,	0.167	n/a
X:71681854|71708891	71682212:71682292	ES,	0.167	n/a
20:30954187|30956926	30955443:30955532	ES,	0.163	n/a
13:80094945|80113910	80107464:80107591	A3SS,	0.158	n/a
3:61975299|61989171	61987089:61987224	ES,	0.158	n/a
5:130883740|130897740	130895450:130895521	ES,	0.158	n/a
7:156516806|156619438	156518458:156518531	ES,	0.158	n/a
7:156758964|156759786	156758964:156759118	A5SS,	0.158	n/a
X:14814282|14815420	14814892:14815420	IR,	0.158	n/a
15:51204275|51223168	51207622:51207768	A3SS,	0.154	n/a
3:195101738|195133645	195132485:195132580	ES,	0.154	n/a
9:100839200|100840629	100840576:100840629	A3SS,	0.154	n/a
3:4452549|4461830	4458260:4458343	ES,	0.153	n/a
5:134509732|134589702	134551106:134551306	ES,	0.152	n/a
4:184114752|184130178	184129189:184129309	A3SS,	0.15	n/a
6:34789430|34789732	34789430:34789732	IR,	0.15	n/a
1:180366651|180382606	180370846:180370915	ES,	0.148	n/a
11:86778736|86802437	86786679:86786828	ES,	0.147	n/a
1:42730786|42776781	42744019:42744291	A3SS,	0.143	n/a
1:225718256|225755116	225742608:225742757	A3SS,	0.143	n/a
1:231079552|231097049	231092167:231092306	ES,A3SS,	0.143	n/a
11:86267595|86270865	86268994:86269053	ES,A3SS,	0.143	n/a
16:16101673|16110478	16110419:16110478	A3SS,	0.143	n/a
16:27222467|27226329	27222467:27222542	A5SS,	0.143	n/a
19:13039156|13039661	13039156:13039477	IR,	0.143	n/a
20:49518554|49535318	49521303:49521386	ES,	0.143	n/a
21:38792601|38802702	38794884:38794954	ES,A3SS,	0.143	n/a
3:149563798|149639014	149619499:149619641	ES,	0.143	n/a
4:26638833|26690029	26640393:26640456	A3SS,	0.143	n/a
5:43700221|43704502	43702771:43702838	A3SS,	0.143	n/a
5:76745585|76785397	76745585:76745685	A3SS,	0.143	n/a
6:99860427|99864304	99862448:99862562	A3SS,	0.143	n/a
7:24663285|24681487	24665299:24665355	ES,	0.143	n/a
7:98988516|98988876	98988516:98988672	A5SS,	0.143	n/a
X:71681854|71715118	71682212:71682292	ES,	0.143	n/a
1:108724563|108728576	108727838:108727892	ES,A5SS,	0.138	n/a
7:158704241|158711560	158706924:158707045	A5SS,	0.138	n/a
10:74100547|74100928	74100547:74100660	A3SS,	0.136	n/a
17:46189393|46190763	46189393:46189453	A5SS,	0.136	n/a
2:176835492|176860374	176858873:176859008	ES,A5SS,	0.136	n/a
12:11126254|11199787	11181000:11181114	ES,	0.135	n/a
12:122181535|122190129	122188272:122188345	A3SS,	0.133	n/a
19:23556544|23557566	23556544:23556622	A3SS,	0.133	n/a
2:225400245|225422573	225421012:225421106	ES,A3SS,	0.132	n/a
8:38975605|39018484	38987495:38987616	ES,	0.13	n/a
11:20424465|20448411	20426424:20426529	ES,	0.128	n/a
8:141856359|141874498	141871323:141871446	ES,	0.128	n/a
1:63944435|63955889	63952304:63952444	ES,A5SS,	0.125	n/a
1:235582788|235597595	235582788:235582873	A5SS,	0.125	n/a
1:245165423|245180628	245165423:245165534	A5SS,	0.125	n/a
12:19498776|19506936	19500041:19500116	ES,	0.125	n/a
12:109212025|109212334	109212208:109212334	A5SS,	0.125	n/a
13:96622366|96648389	96637493:96637591	ES,	0.125	n/a
14:31765115|31771725	31765115:31765215	A3SS,	0.125	n/a
15:59204762|59209198	59204762:59204799	A3SS,	0.125	n/a
21:38792601|38802702	38794878:38794954	ES,A3SS,	0.125	n/a
22:48081949|48082955	48082324:48082444	A3SS,	0.125	n/a
22:50810449|50832564	50827463:50827540	ES,A3SS,	0.125	n/a
4:83799883|83803090	83801815:83801864	ES,	0.125	n/a
5:137288317|137290065	137289025:137289178	A3SS,	0.125	n/a
6:36040650|36043739	36043598:36043739	A3SS,	0.125	n/a
6:125366357|125379252	125367753:125367807	ES,	0.125	n/a
X:72797243|72804408	72802216:72802247	ES,	0.125	n/a
1:180366651|180382606	180370657:180370754	ES,A5SS,	0.123	n/a
7:141336760|141349133	141339634:141339742	ES,	0.122	n/a
X:24190832|24197887	24191724:24191840	ES,	0.119	n/a
12:129293333|129299615	129293941:129293994	A3SS,	0.118	n/a
7:156516806|156619438	156518129:156518291	ES,A3SS,	0.118	n/a
2:61749746|61753656	61752177:61752238	ES,	0.115	n/a
1:51171458|51267349	51199865:51199988	ES,	0.111	n/a
11:76670023|76709865	76705200:76705270	ES,	0.111	n/a
12:11126254|11199787	11187381:11187484	ES,	0.111	n/a
12:28408514|28460682	28457559:28457644	ES,	0.111	n/a
12:112371690|112429693	112374496:112374634	ES,	0.111	n/a
13:61013822|61060082	61018821:61018882	A3SS,	0.111	n/a
14:71948872|71996087	71970329:71970385	ES,	0.111	n/a
14:71948872|71996087	71950459:71950599	ES,	0.111	n/a
7:24663282|24681487	24663681:24663775	ES,	0.111	n/a
7:103801520|103808973	103801520:103801578	A3SS,	0.111	n/a
10:74474869|74475660	74475612:74475660	A3SS,	0.109	n/a
9:74817487|74828907	74823141:74823210	ES,	0.108	n/a
2:61749746|61761038	61752405:61752468	ES,	0.106	n/a
7:33185854|33217203	33192313:33192467	A5SS,	0.106	n/a
3:47777524|47787483	47777524:47777576	A3SS,	0.105	n/a
5:80911292|80946158	80934547:80934588	ES,	0.105	n/a
10:34985246|34989132	34989028:34989132	A5SS,	0.1	n/a
11:78176922|78204241	78189484:78189516	ES,A3SS,	0.1	n/a
12:29812813|29814312	29812813:29812855	A3SS,	0.1	n/a
13:113845186|113854830	113845186:113845285	A3SS,	0.1	n/a
15:59548483|59564648	59552020:59552132	ES,	0.1	n/a
2:197777606|197787849	197787738:197787849	A5SS,	0.1	n/a
21:45089765|45093836	45093768:45093836	A3SS,	0.1	n/a
4:106345353|106377902	106377405:106377448	ES,	0.1	n/a
1:246600450|246603426	246600450:246600565	A3SS,	0.098	n/a
15:36936479|36950106	36945824:36945896	ES,	0.097	n/a
2:159922408|159954346	159932987:159933040	ES,	0.093	n/a
6:159001972|159010814	159010680:159010814	A3SS,	0.092	n/a
10:93940720|93952393	93947387:93947463	ES,	0.091	n/a
12:70903992|70916410	70914566:70914708	ES,	0.091	n/a
12:124130002|124137282	124137071:124137108	A3SS,	0.091	n/a
14:71880665|71979562	71884801:71884913	A3SS,	0.091	n/a
15:25650608|25657118	25652214:25652359	ES,A3SS,	0.091	n/a
17:37864574|37866734	37866339:37866454	ES,	0.091	n/a
17:59853762|59857762	59856034:59856139	ES,	0.091	n/a
2:98504515|98543950	98541809:98541928	ES,	0.091	n/a
21:45012106|45033828	45016682:45016760	ES,	0.091	n/a
3:43591212|43607219	43592964:43593058	ES,A3SS,	0.091	n/a
3:197592294|197602646	197600220:197600432	ES,	0.091	n/a
4:52729603|52744020	52740887:52740990	ES,	0.091	n/a
5:10213603|10224173	10213603:10213687	A3SS,	0.091	n/a
5:130883740|130897740	130883740:130883854	A3SS,	0.091	n/a
7:11101418|11151094	11101418:11101478	A5SS,	0.091	n/a
8:42761316|42785315	42768885:42768931	ES,	0.091	n/a
3:31917925|31921322	31918172:31918236	ES,	0.089	n/a
14:84112888|84132553	84128842:84128982	ES,	0.088	n/a
17:29483001|29497015	29491067:29491097	ES,	0.088	n/a
1:197611841|197627499	197616185:197616244	ES,	0.087	n/a
14:69583083|69589077	69585886:69585947	A5SS,	0.087	n/a
4:88005272|88012981	88010733:88010842	ES,A3SS,	0.087	n/a
5:170667932|170669824	170667932:170668121	A5SS,	0.087	n/a
1:41536267|41541123	41537503:41537645	ES,	0.086	n/a
22:46125305|46136418	46132848:46132963	ES,	0.085	n/a
12:28408514|28460682	28408935:28409011	ES,	0.084	n/a
12:116668238|116675510	116674962:116675078	ES,	0.083	n/a
14:99924616|99932150	99924616:99924854	A3SS,	0.083	n/a
15:51240217|51250991	51242248:51242361	A5SS,	0.083	n/a
6:30618771|30619243	30618771:30618859	A5SS,	0.083	n/a
7:27668990|27689252	27671955:27672060	ES,A3SS,	0.083	n/a
10:96201653|96234540	96203085:96203180	ES,	0.082	n/a
3:196842798|196846401	196842798:196842895	A3SS,	0.082	n/a
14:71880665|71996087	71995416:71995457	ES,	0.081	n/a
16:15973661|15978062	15976806:15976905	ES,	0.081	n/a
3:51575514|51624575	51606841:51606931	ES,	0.081	n/a
5:38523521|38530768	38523521:38523672	A3SS,	0.081	n/a
5:38523521|38530768	38527338:38527396	A5SS,	0.081	n/a
8:18656805|18662408	18657079:18657157	ES,A3SS,	0.081	n/a
10:7262373|7269899	7267226:7267337	ES,A5SS,	0.08	n/a
10:7262373|7269899	7267242:7267337	ES,A5SS,	0.08	n/a
2:64083440|64085070	64084098:64084136	ES,	0.08	n/a
2:136505837|136519481	136511710:136511847	A3SS,	0.08	n/a
10:1130343|1142186	1141608:1141769	ES,	0.077	n/a
14:64144905|64150840	64144905:64145151	A3SS,	0.077	n/a
2:176844538|176860374	176858873:176859008	ES,	0.077	n/a
5:167915607|167921655	167920899:167920988	A5SS,	0.077	n/a
5:167915607|167921655	167921581:167921655	A3SS,	0.077	n/a
7:24663285|24681487	24663667:24663775	ES,	0.077	n/a
9:33953283|33973235	33956077:33956144	ES,	0.077	n/a
9:125846922|125852664	125849273:125849380	ES,	0.077	n/a
12:120592774|120593523	120592774:120593234	IR,	0.076	n/a
2:225400245|225422573	225421012:225421161	ES,A3SS,	0.075	n/a
4:148867768|148887990	148886179:148886280	A3SS,	0.075	n/a
5:138979957|138994551	138994171:138994359	IR,	0.074	n/a
7:27668990|27689252	27668990:27669049	A3SS,	0.074	n/a
1:9991949|9994918	9994846:9994918	A5SS,	0.073	n/a
16:28112779|28113266	28112779:28112925	A3SS,	0.073	n/a
12:19406874|19413955	19413888:19413955	A3SS,	0.071	n/a
16:89484692|89497734	89497660:89497734	A5SS,	0.071	n/a
2:109463194|109473426	109473297:109473426	A3SS,	0.071	n/a
22:50810449|50832564	50830255:50830444	ES,A3SS,	0.071	n/a
9:136277419|136278041	136277419:136277630	A3SS,	0.071	n/a
X:112291554|112293180	112291554:112291651	A5SS,	0.071	n/a
1:231090079|231097049	231092167:231092262	ES,A3SS,	0.07	n/a
21:38792601|38845182	38828432:38828610	ES,	0.07	n/a
2:53628798|53642744	53633138:53633232	ES,	0.069	n/a
2:240929491|240946787	240942466:240942557	ES,A3SS,	0.069	n/a
18:55833020|55919286	55895062:55895139	ES,	0.068	n/a
1:8601273|8617582	8611267:8611398	ES,	0.067	n/a
1:36432556|36439112	36433492:36433583	ES,	0.067	n/a
10:96201653|96234540	96204228:96204296	ES,	0.067	n/a
12:116674626|116675510	116674962:116675078	ES,	0.067	n/a
14:61509865|61545645	61518759:61518853	ES,	0.067	n/a
6:24416625|24418806	24418312:24418439	A5SS,	0.067	n/a
7:158580695|158591763	158581036:158581100	ES,A3SS,	0.067	n/a
10:74468041|74475660	74475520:74475660	A3SS,	0.066	n/a
14:71880665|71933964	71933836:71933964	A3SS,	0.065	n/a
20:10536879|10541468	10537967:10538074	ES,	0.065	n/a
10:96201653|96234540	96211315:96211366	ES,	0.063	n/a
10:96201653|96234540	96218237:96218352	ES,	0.063	n/a
1:212502477|212506940	212502477:212502612	A5SS,	0.062	n/a
17:4186093|4200109	4192525:4192662	A3SS,	0.062	n/a
2:234296903|234299129	234298495:234298687	ES,A3SS,	0.062	n/a
14:71880665|71996087	71933836:71933964	ES,A3SS,	0.061	n/a
3:48019355|48040369	48035914:48036083	ES,A3SS,	0.061	n/a
8:18656805|18662408	18662032:18662132	A3SS,	0.061	n/a
14:84112888|84132553	84117707:84117811	ES,A3SS,	0.059	n/a
21:38792601|38802702	38799604:38799703	ES,	0.059	n/a
3:196094899|196129890	196120421:196120490	A5SS,	0.059	n/a
7:156516806|156619438	156518129:156518219	ES,A3SS,	0.059	n/a
2:225400245|225422573	225421012:225421155	ES,A3SS,	0.057	n/a
9:138773479|138774924	138774061:138774222	ES,	0.057	n/a
12:70671912|70713144	70687851:70688074	A3SS,	0.056	n/a
17:1746097|1756483	1747214:1747321	A5SS,	0.056	n/a
2:228356263|228389631	228388535:228388641	A3SS,	0.056	n/a
17:36517594|36533668	36520635:36520739	ES,	0.055	n/a
5:619105|620376	619105:620376	IR,	0.054	n/a
12:27872741|27877119	27875461:27875568	ES,	0.053	n/a
12:32861087|32871697	32862478:32862541	ES,	0.053	n/a
2:61505300|61508377	61507379:61507479	A3SS,	0.053	n/a
4:85800559|85853516	85833405:85833472	ES,	0.053	n/a
7:64004085|64004810	64004455:64004579	ES,	0.053	n/a
19:18650181|18650530	18650181:18650530	IR,	0.052	n/a
7:27668990|27689252	27671955:27672045	ES,A3SS,	0.05	n/a
14:102506573|102507010	102506573:102506756	A5SS,	0.049	n/a
14:102506573|102507010	102506933:102507010	A3SS,	0.049	n/a
14:102506573|102507010	102506573:102506772	A5SS,	0.049	n/a
9:74817487|74834422	74823141:74823254	ES,A5SS,	0.049	n/a
1:180366651|180382606	180371504:180371594	ES,	0.048	n/a
12:19615444|19626289	19615444:19615637	A5SS,	0.048	n/a
15:50330965|50339661	50336473:50336567	ES,	0.048	n/a
17:4186093|4200109	4192525:4192723	A3SS,	0.047	n/a
3:196831774|196846401	196842798:196842895	A3SS,	0.047	n/a
10:7285520|7327916	7325866:7326112	A3SS,	0.045	n/a
17:59853762|59857762	59857392:59857449	ES,	0.045	n/a
2:176835492|176860374	176858862:176859008	ES,A5SS,	0.045	n/a
2:207144264|207162097	207145350:207145419	ES,	0.045	n/a
5:619105|620376	620251:620376	A3SS,	0.045	n/a
5:32268807|32276848	32270951:32271053	A5SS,	0.045	n/a
5:80021272|80040434	80033320:80033354	ES,	0.045	n/a
8:18656805|18662408	18658780:18658817	ES,A3SS,	0.045	n/a
2:240929491|240946787	240945165:240945258	ES,	0.044	n/a
8:100286426|100287482	100287316:100287482	A3SS,	0.044	n/a
9:20819795|20823114	20820940:20821060	A5SS,	0.044	n/a
1:155691308|155695810	155691308:155691471	A5SS,	0.043	n/a
12:109046048|109048186	109046814:109046977	ES,A3SS,	0.043	n/a
18:45391430|45396935	45395614:45395841	A3SS,	0.043	n/a
3:47762156|47777616	47762919:47762986	ES,	0.043	n/a
3:52946554|52950230	52946554:52946638	A3SS,	0.043	n/a
5:43675613|43704502	43704445:43704502	A3SS,	0.043	n/a
9:114148657|114154104	114152264:114152377	A3SS,	0.043	n/a
9:126319849|126345549	126327872:126327927	ES,	0.043	n/a
10:93902786|93952393	93946042:93946139	ES,	0.042	n/a
10:93902786|93952393	93947387:93947463	ES,	0.042	n/a
12:28458582|28460682	28459743:28459878	A3SS,	0.042	n/a
12:28458582|28460682	28458582:28458712	A5SS,	0.042	n/a
2:234296903|234299129	234298541:234298687	ES,A3SS,	0.042	n/a
22:50810449|50832564	50827415:50827540	ES,A3SS,	0.042	n/a
11:61133517|61135470	61134879:61134997	ES,A3SS,	0.041	n/a
16:89484692|89488713	89485736:89485856	ES,	0.04	n/a
11:86778736|86802437	86783945:86784020	ES,A5SS,	0.039	n/a
12:19626182|19653155	19641247:19641341	ES,	0.039	n/a
5:65284463|65310553	65307877:65307967	A5SS,	0.039	n/a
5:179688684|179707608	179688684:179688782	A3SS,	0.038	n/a
11:106849345|106856857	106849345:106849460	A3SS,	0.037	n/a
12:70901675|70916410	70914566:70914708	ES,	0.037	n/a
8:48196617|48206619	48206467:48206619	A3SS,	0.037	n/a
22:50810449|50832564	50832179:50832228	ES,	0.036	n/a
9:96233423|96238620	96236515:96236612	ES,	0.036	n/a
2:148730308|148739650	148731013:148731093	ES,A5SS,	0.035	n/a
8:141874411|141900868	141884562:141884629	ES,	0.035	n/a
1:70766447|70781249	70779428:70779469	A3SS,	0.034	n/a
1:225140372|225195246	225190485:225190629	ES,	0.034	n/a
1:247318868|247323115	247320302:247320519	ES,A3SS,	0.034	n/a
2:11426665|11428575	11426665:11426869	A3SS,	0.034	n/a
2:64083440|64085070	64083922:64084016	ES,	0.034	n/a
7:158566032|158591763	158586341:158586409	A3SS,	0.034	n/a
1:92798948|92846430	92798948:92799018	A5SS,	0.033	n/a
3:195101738|195112876	195101935:195101987	ES,	0.033	n/a
12:102291641|102295211	102291641:102291712	A5SS,	0.032	n/a
12:102291641|102295211	102295091:102295211	A3SS,	0.032	n/a
17:79937060|79943483	79937060:79937205	A5SS,	0.032	n/a
1:23356962|23377013	23366752:23366927	ES,	0.031	n/a
7:152007051|152012423	152008998:152009031	A5SS,	0.031	n/a
16:89484692|89497734	89491849:89492069	ES,	0.03	n/a
17:80992911|81006661	80995529:80995702	ES,	0.03	n/a
3:48019355|48040369	48035914:48036002	ES,A3SS,	0.03	n/a
5:95091100|95099324	95099249:95099324	A3SS,	0.03	n/a
1:21415631|21437876	21423682:21423819	ES,	0.029	n/a
12:116668238|116675510	116669864:116669961	ES,	0.029	n/a
12:122973933|122977336	122975482:122975560	ES,	0.029	n/a
14:71880665|71996087	71884801:71884913	ES,A3SS,	0.029	n/a
2:148730308|148739650	148739533:148739650	A5SS,	0.029	n/a
9:20819795|20823114	20821814:20821889	ES,	0.029	n/a
22:25771780|25777545	25771780:25771867	A3SS,	0.028	n/a
7:74119496|74133260	74129177:74129236	ES,	0.028	n/a
15:50330965|50366382	50336473:50336567	ES,	0.027	n/a
2:72945232|72960247	72948162:72948293	ES,	0.027	n/a
9:74825603|74834422	74828816:74828907	A3SS,	0.027	n/a
1:247318868|247323115	247318868:247318994	A3SS,	0.026	n/a
17:29483001|29497015	29486028:29486106	A5SS,	0.026	n/a
17:29483001|29497015	29490208:29490394	A3SS,	0.026	n/a
3:4452549|4461830	4458812:4458952	A3SS,	0.026	n/a
4:7870349|7873807	7870349:7870420	A3SS,	0.026	n/a
14:102506573|102507010	102506573:102506776	A5SS,	0.024	n/a
20:49518554|49535318	49533028:49533191	ES,	0.024	n/a
6:87925621|87928449	87925621:87925680	A5SS,	0.024	n/a
11:46098305|46113774	46112006:46112132	ES,A3SS,	0.023	n/a
14:71880665|71996087	71948872:71948928	ES,	0.023	n/a
3:138289160|138291826	138289876:138289976	A3SS,	0.023	n/a
6:159001972|159010814	159010716:159010814	A3SS,	0.023	n/a
8:18656805|18662408	18657079:18657184	ES,A3SS,	0.023	n/a
4:78694235|78697546	78695684:78695866	A3SS,	0.022	n/a
X:80047353|80049271	80047353:80047443	A3SS,	0.022	n/a
2:207144264|207162097	207156776:207156840	ES,A3SS,	0.021	n/a
22:30032740|30038274	30035202:30035320	ES,	0.02	n/a
5:76745585|76760634	76747116:76747171	A3SS,	0.02	n/a
5:76745585|76760634	76747116:76747149	A3SS,	0.02	n/a
9:86297866|86301070	86300131:86300231	ES,	0.02	n/a
17:1746097|1747980	1747214:1747321	A5SS,	0.019	n/a
7:158580695|158591763	158580695:158580789	A3SS,	0.019	n/a
1:247318868|247323115	247318868:247318927	A3SS,	0.018	n/a
1:247318868|247323115	247320302:247320705	ES,A3SS,	0.017	n/a
5:58476421|58511794	58488823:58488871	ES,	0.017	n/a
1:180366651|180382606	180382210:180382300	ES,	0.016	n/a
1:231090079|231097049	231090079:231090124	A3SS,	0.016	n/a
10:7318854|7327916	7325866:7326112	A3SS,	0.016	n/a
14:71880665|71996087	71975097:71975266	ES,	0.016	n/a
2:72945232|72960247	72947189:72947257	ES,	0.016	n/a
2:207144264|207162097	207162014:207162097	A3SS,	0.016	n/a
7:27668990|27689252	27676295:27676356	ES,	0.016	n/a
10:120488807|120489922	120489348:120489423	ES,	0.015	n/a
1:92798948|92846430	92829266:92829327	ES,	0.014	n/a
13:96636058|96651561	96637493:96637591	ES,	0.014	n/a
4:129913322|129925031	129920827:129920919	A3SS,	0.014	n/a
4:129913322|129925031	129924968:129925031	A5SS,	0.014	n/a
5:176370336|176385155	176372038:176372139	ES,	0.014	n/a
7:74119496|74133260	74131218:74131270	A3SS,	0.014	n/a
X:72797243|72804408	72798575:72798621	A3SS,	0.014	n/a
3:157839892|157841780	157841661:157841780	A3SS,	0.013	n/a
7:158580695|158591763	158586352:158586417	A5SS,	0.013	n/a
14:71880665|71996087	71964571:71964606	ES,	0.011	n/a
2:225400245|225422573	225412638:225412676	ES,	0.011	n/a
6:159004986|159010814	159010680:159010814	A3SS,	0.011	n/a
1:94107860|94140497	94132652:94132785	ES,	0.01	n/a
1:23356962|23377013	23364878:23365053	ES,	0.009	n/a
10:76074425|76158337	76140687:76140749	ES,	0.009	n/a
15:80412670|80415142	80414090:80414162	A3SS,	0.009	n/a
1:247318868|247323115	247320302:247320509	ES,A3SS,	0.008	n/a
10:7318854|7327916	7325866:7326043	A3SS,	0.008	n/a
2:72945232|72960247	72958284:72958411	ES,A3SS,	0.008	n/a
3:196118684|196129890	196127500:196127603	ES,	0.008	n/a
5:170305101|170323119	170308825:170308900	A3SS,	0.008	n/a
5:170305101|170323119	170305101:170305251	A5SS,	0.008	n/a
13:33091994|33101669	33099321:33099390	ES,	0.007	n/a
2:61749746|61761038	61756201:61756294	ES,	0.007	n/a
7:74119496|74133260	74129443:74129486	ES,	0.007	n/a
1:247302018|247323115	247318868:247318997	ES,A3SS,	0.006	n/a
2:61749746|61761038	61752627:61752694	ES,	0.005	n/a
21:16386665|16415895	16412684:16412737	ES,	0.005	n/a
21:16386665|16415895	16394254:16394318	ES,	0.005	n/a
7:158580695|158591763	158580695:158580773	A3SS,	0.005	n/a
1:92798948|92846430	92823114:92823183	ES,	0.004	n/a
1:247318868|247323115	247320302:247320423	ES,A3SS,	0.004	n/a
12:116668338|116675510	116674962:116675078	ES,	0.004	n/a
17:57842332|57851246	57842332:57842495	A5SS,	0.004	n/a
2:61749746|61761038	61752177:61752238	ES,	0.004	n/a
3:196118684|196129890	196120421:196120490	A5SS,	0.004	n/a
5:619105|620376	620182:620376	A3SS,	0.004	n/a
5:619105|620376	619105:619220	A5SS,	0.004	n/a
5:619105|620376	619105:619204	A5SS,	0.004	n/a
2:72945232|72960247	72958284:72958364	ES,A3SS,	0.002	n/a
2:72945232|72960247	72960112:72960247	A5SS,	0.002	n/a
5:137320946|137324004	137323150:137323297	A3SS,	0.002	n/a

## Sheet: SRR5889366_NCM460_rep2
circRNA_id	alternatively_spliced_exon	AS_type	psi_estimation_without_correction	psi_estimation_after_correction
1:119805525|119817929	119805525:119805567	A5SS,	1	n/a
1:145646115|145663367	145648016:145648067	ES,	1	n/a
1:161748034|161753886	161748034:161748110	A5SS,	1	n/a
1:51860053|51866625	51860053:51860119	A3SS,	1	n/a
1:53267491|53267811	53267491:53267652	A5SS,	1	n/a
1:54254806|54262817	54262362:54262477	A5SS,	1	n/a
1:54254806|54262817	54258902:54258952	ES,	1	n/a
1:9991949|9994918	9994820:9994918	A5SS,	1	n/a
10:128768966|128780237	128769172:128769204	ES,	1	n/a
10:74468041|74475660	74468041:74468114	A5SS,	1	n/a
10:74474869|74475660	74475520:74475660	A3SS,	1	n/a
11:102076624|102080295	102076624:102076805	A5SS,	1	n/a
11:46098305|46113774	46098305:46098370	A3SS,	1	n/a
11:65198240|65205128	65198240:65198317	A5SS,	1	n/a
11:65269792|65272066	65269792:65269864	A5SS,	1	n/a
11:8987451|8989588	8987451:8987591	A5SS,	1	n/a
12:10977651|11001006	10999644:10999734	A3SS,	1	n/a
12:110983685|110989773	110983685:110983883	A3SS,	1	n/a
12:112303054|112308984	112303960:112304035	ES,	1	n/a
12:46622936|46637097	46636983:46637097	A5SS,	1	n/a
12:70671912|70713144	70713078:70713144	A3SS,	1	n/a
13:100181721|100190117	100188862:100188991	A5SS,	1	n/a
13:100181721|100190117	100189993:100190117	A3SS,	1	n/a
13:61013822|61042537	61018817:61018882	A3SS,	1	n/a
14:50120708|50122529	50120873:50120932	A3SS,	1	n/a
14:50615003|50619891	50619788:50619891	A5SS,	1	n/a
14:71880665|72043304	71970329:71970385	ES,	1	n/a
14:71880665|72043304	71884847:71884913	ES,	1	n/a
14:97299804|97304154	97299804:97299968	A5SS,	1	n/a
14:97299804|97313681	97299804:97299968	A5SS,	1	n/a
14:97299804|97322923	97299804:97299968	A5SS,	1	n/a
14:97299804|97327072	97299804:97299968	A5SS,	1	n/a
14:97312432|97327072	97321561:97321693	A5SS,	1	n/a
15:40895113|40903709	40897308:40897347	A5SS,	1	n/a
15:43164809|43170882	43164809:43164894	A3SS,	1	n/a
15:51204275|51223168	51207645:51207764	A3SS,	1	n/a
15:52223228|52226551	52223228:52223501	A5SS,	1	n/a
15:57355948|57490023	57383987:57384089	ES,	1	n/a
15:62871704|62881961	62871704:62871827	A5SS,	1	n/a
15:72837161|72864506	72859447:72859518	ES,	1	n/a
15:72837161|72864506	72862518:72862648	ES,	1	n/a
15:72837161|72864506	72858904:72858946	ES,	1	n/a
15:76566753|76585041	76576098:76576166	ES,	1	n/a
16:83940592|83945972	83940592:83940704	A5SS,	1	n/a
16:89824985|89828430	89824985:89825113	A3SS,	1	n/a
17:18152114|18154331	18152114:18152222	A3SS,	1	n/a
17:29483001|29490394	29486028:29486111	A5SS,	1	n/a
17:29483001|29491097	29486028:29486111	A5SS,	1	n/a
17:29483001|29497015	29490204:29490394	A3SS,	1	n/a
17:29483001|29509683	29486028:29486111	A5SS,	1	n/a
17:37580880|37588269	37587368:37587441	ES,	1	n/a
17:57814814|57851246	57842332:57842499	A5SS,	1	n/a
17:57842332|57851305	57842332:57842499	A5SS,	1	n/a
17:57842332|57886237	57842332:57842499	A5SS,	1	n/a
17:64637473|64647582	64637473:64637588	A5SS,	1	n/a
17:7402358|7402810	7402358:7402482	A5SS,	1	n/a
19:3660964|3661999	3660964:3661081	A3SS,	1	n/a
2:120634899|120640199	120635040:120635118	A3SS,	1	n/a
2:169018297|169038600	169023809:169023917	A3SS,	1	n/a
2:172325398|172325962	172325829:172325962	A3SS,	1	n/a
2:225400245|225431828	225421012:225421106	A3SS,	1	n/a
2:232952197|232952750	232952714:232952750	A3SS,	1	n/a
2:234271723|234299129	234298575:234298687	ES,	1	n/a
2:27014999|27016761	27015624:27015701	ES,	1	n/a
2:29073194|29084174	29075274:29075365	A3SS,	1	n/a
2:61308587|61315603	61310389:61310449	A3SS,	1	n/a
2:61505300|61508377	61507379:61507483	A3SS,	1	n/a
2:61507379|61508377	61507379:61507483	A3SS,	1	n/a
2:70451686|70456450	70452460:70452525	ES,	1	n/a
20:33622926|33645374	33637669:33637797	A3SS,	1	n/a
20:34317234|34320057	34317234:34317287	A3SS,	1	n/a
20:49518554|49535318	49535198:49535318	A5SS,	1	n/a
21:46536848|46548488	46548317:46548488	A3SS,	1	n/a
21:46536848|46548488	46540709:46540874	A5SS,	1	n/a
21:46536888|46548488	46548317:46548488	A3SS,	1	n/a
21:46536888|46548488	46540709:46540874	A5SS,	1	n/a
21:46540709|46548488	46540709:46540874	A5SS,	1	n/a
22:29140603|29141996	29140603:29140697	A5SS,	1	n/a
3:119219542|119232566	119222379:119222467	ES,	1	n/a
3:119219542|119232566	119222801:119222868	ES,	1	n/a
3:12343020|12353952	12343421:12343535	ES,	1	n/a
3:136183723|136196254	136192381:136192479	A3SS,	1	n/a
3:136191255|136196254	136192381:136192479	A3SS,	1	n/a
3:149613260|149639014	149619859:149619949	ES,	1	n/a
3:185251359|185252920	185251359:185251467	A3SS,	1	n/a
3:31617888|31621588	31617888:31617996	A5SS,	1	n/a
3:31617888|31641951	31617888:31617996	A5SS,	1	n/a
3:4403723|4452662	4418014:4418073	A3SS,	1	n/a
3:4418014|4461823	4418014:4418073	A3SS,	1	n/a
3:4418014|4461830	4418014:4418073	A3SS,	1	n/a
3:4418014|4491024	4418014:4418073	A3SS,	1	n/a
3:47465423|47470160	47465423:47465535	A3SS,	1	n/a
3:61733612|61734656	61734561:61734656	A3SS,	1	n/a
3:9466151|9470693	9466151:9466210	A5SS,	1	n/a
4:151719233|151738409	151719233:151719294	A3SS,	1	n/a
4:83795764|83803093	83799883:83800081	A3SS,	1	n/a
5:111594926|111602027	111595588:111595676	A3SS,	1	n/a
5:111594926|111616020	111595588:111595676	A3SS,	1	n/a
5:111594926|111643187	111595588:111595676	A3SS,	1	n/a
5:130883740|130928159	130883740:130883883	A3SS,	1	n/a
5:130883740|130940386	130883740:130883883	A3SS,	1	n/a
5:137320946|137324004	137320946:137321078	A3SS,	1	n/a
5:137708363|137717279	137715273:137715397	ES,	1	n/a
5:170305101|170323119	170319391:170319557	ES,	1	n/a
5:170610203|170632616	170632528:170632616	A3SS,	1	n/a
5:31435872|31451747	31435872:31435971	A3SS,	1	n/a
5:31435872|31451747	31437346:31437405	ES,	1	n/a
5:38991051|39021238	39003660:39003724	A3SS,	1	n/a
5:38991051|39021238	39021141:39021238	A5SS,	1	n/a
5:74109665|74137504	74109665:74109844	A3SS,	1	n/a
5:904263|908576	904263:904339	A5SS,	1	n/a
6:101163338|101173579	101165951:101166127	A3SS,	1	n/a
6:105259186|105291173	105259186:105259268	A3SS,	1	n/a
6:151197226|151206870	151198909:151198962	ES,	1	n/a
6:154762426|154763424	154762426:154762513	A3SS,	1	n/a
6:158994452|159046786	159001972:159002027	ES,	1	n/a
6:167435897|167438382	167435897:167436123	A5SS,	1	n/a
6:167435897|167447459	167435897:167436123	A5SS,	1	n/a
7:66177154|66177944	66177503:66177600	A3SS,	1	n/a
7:8095063|8110761	8110551:8110761	A3SS,	1	n/a
8:100286426|100287482	100287309:100287482	A3SS,	1	n/a
8:128152989|128161917	128156008:128156104	A3SS,	1	n/a
8:141840571|141874498	141856359:141856421	ES,	1	n/a
8:19589967|19610737	19598949:19599046	ES,	1	n/a
8:25126361|25136181	25136085:25136181	A3SS,	1	n/a
8:30332295|30336893	30336436:30336489	ES,	1	n/a
8:62531537|62566219	62546242:62546286	ES,	1	n/a
9:115030329|115060196	115060112:115060196	A5SS,	1	n/a
9:132839578|132845881	132839578:132839657	A5SS,	1	n/a
9:134312007|134314448	134312233:134312282	ES,	1	n/a
9:138741983|138758382	138754313:138754454	ES,	1	n/a
X:155119121|155130251	155119121:155119275	A5SS,	1	n/a
X:73494177|73504654	73494177:73494245	A3SS,	1	n/a
X:73494177|73504654	73500229:73500329	A5SS,	1	n/a
X:73494177|73513226	73500229:73500329	A5SS,	1	n/a
10:7318854|7327916	7325866:7325921	A3SS,	0.997	n/a
17:57842332|57851246	57842332:57842499	A5SS,	0.997	n/a
12:111990084|111993723	111990710:111990781	ES,	0.996	n/a
2:58449077|58459247	58449077:58449177	A3SS,	0.996	n/a
12:111990084|111993723	111991962:111992021	ES,	0.995	n/a
2:72945232|72960247	72958136:72958181	ES,A3SS,	0.995	n/a
11:33307959|33309057	33307959:33309057	IR,	0.994	n/a
5:619105|620376	619105:619232	A5SS,	0.994	n/a
10:126631026|126631876	126631026:126631876	IR,	0.993	n/a
12:46622936|46637097	46633462:46633676	ES,A3SS,	0.993	n/a
6:159004986|159010814	159006336:159006457	A5SS,	0.993	n/a
1:247320302|247323115	247322308:247322368	ES,	0.992	n/a
13:33091994|33101669	33095510:33095586	ES,	0.992	n/a
14:81362062|81372425	81372299:81372425	A5SS,	0.992	n/a
22:30032740|30038274	30035079:30035201	ES,	0.992	n/a
8:141856359|141900868	141874411:141874498	ES,	0.992	n/a
1:247320302|247323115	247322989:247323115	A5SS,	0.991	n/a
1:92798948|92846430	92801904:92801984	ES,	0.991	n/a
12:120592774|120593523	120593045:120593234	ES,	0.991	n/a
9:138773479|138774924	138773479:138773640	A3SS,	0.991	n/a
11:46515158|46534363	46529741:46529920	ES,	0.99	n/a
6:159001972|159010814	159010704:159010814	A3SS,	0.99	n/a
5:176370336|176385155	176378475:176378578	ES,	0.987	n/a
5:179688684|179707608	179688684:179688822	A3SS,	0.987	n/a
7:27668990|27672064	27668990:27669111	A3SS,	0.986	n/a
10:86177527|86185649	86177527:86177617	A5SS,	0.985	n/a
3:196831774|196846401	196831774:196831876	A3SS,	0.985	n/a
3:11399892|11468400	11468278:11468400	A3SS,	0.984	n/a
7:33185854|33217203	33192313:33192463	A5SS,	0.984	n/a
1:42730786|42744343	42744019:42744343	A5SS,	0.983	n/a
17:80992911|81006661	81006545:81006661	A5SS,	0.983	n/a
5:95091100|95099324	95099212:95099324	A3SS,	0.983	n/a
3:157839892|157841780	157841655:157841780	A3SS,	0.982	n/a
8:99718695|99719539	99718695:99718862	A3SS,	0.982	n/a
8:99718695|99719539	99719375:99719539	A5SS,	0.982	n/a
9:95030456|95032265	95030456:95030582	A3SS,	0.982	n/a
2:72945232|72960247	72958284:72958374	ES,A3SS,	0.981	n/a
3:4452549|4461830	4458812:4458926	A3SS,	0.981	n/a
19:18650181|18650530	18650361:18650530	A5SS,	0.98	n/a
22:42204879|42206295	42204879:42204997	A5SS,	0.98	n/a
12:117423011|117426674	117423011:117423207	A5SS,	0.978	n/a
12:117423011|117426674	117426468:117426674	A3SS,	0.978	n/a
22:46125305|46136418	46136249:46136418	A3SS,	0.978	n/a
10:86177527|86185649	86185487:86185649	A3SS,	0.977	n/a
2:58425729|58459247	58453863:58453919	ES,	0.977	n/a
3:196831774|196846401	196842798:196842954	A3SS,	0.977	n/a
7:43679048|43680248	43680172:43680248	A5SS,	0.977	n/a
8:18656805|18662408	18658780:18658892	A3SS,	0.977	n/a
14:50136242|50141145	50140841:50140934	A3SS,	0.976	n/a
21:38792601|38802702	38792601:38792686	A5SS,	0.976	n/a
22:46096162|46114373	46098569:46098727	A3SS,	0.976	n/a
9:95018962|95032265	95032167:95032265	A5SS,	0.976	n/a
17:80842021|80858607	80858527:80858607	A3SS,	0.974	n/a
5:95091100|95099324	95091100:95091465	IR,	0.974	n/a
3:138289160|138291826	138289876:138289999	A3SS,	0.973	n/a
8:18656805|18662408	18662032:18662112	A3SS,	0.972	n/a
12:28378728|28412375	28408514:28408595	ES,	0.971	n/a
13:96636058|96651561	96638587:96638686	ES,	0.971	n/a
16:47531310|47549512	47536902:47537001	ES,	0.971	n/a
6:158994452|159010814	159010704:159010814	A3SS,	0.97	n/a
19:17387304|17387718	17387304:17387532	A5SS,	0.969	n/a
5:134388144|134411078	134410107:134410218	A3SS,	0.969	n/a
18:45391430|45396935	45395614:45395807	A3SS,	0.968	n/a
6:159001972|159010814	159004986:159005076	ES,	0.968	n/a
9:74817487|74828907	74828802:74828907	A3SS,	0.968	n/a
1:92798948|92846430	92798948:92799030	A5SS,	0.967	n/a
22:50810449|50832564	50832322:50832564	A3SS,	0.967	n/a
3:196118684|196129890	196120425:196120490	A5SS,	0.967	n/a
7:63796637|63797360	63797265:63797360	A3SS,	0.967	n/a
22:46085592|46098727	46088876:46088958	ES,	0.966	n/a
7:74119496|74133260	74133198:74133260	A3SS,	0.965	n/a
12:28458582|28460682	28459675:28459878	A3SS,	0.964	n/a
6:87925621|87928449	87925621:87925775	A5SS,	0.964	n/a
4:48686690|48712715	48712536:48712715	A5SS,	0.963	n/a
4:48686690|48712715	48686690:48686812	A3SS,	0.963	n/a
1:42730786|42776781	42744019:42744343	A3SS,	0.962	n/a
16:16101673|16110478	16110353:16110478	A3SS,	0.962	n/a
5:107521818|107684231	107559822:107559929	ES,	0.962	n/a
7:158580695|158591763	158581036:158581108	A3SS,	0.961	n/a
2:184016236|184025923	184025782:184025923	A3SS,	0.96	n/a
2:207144264|207162097	207161970:207162097	A3SS,	0.96	n/a
X:67731691|67742759	67742602:67742759	A3SS,	0.96	n/a
1:47761437|47767420	47765577:47765640	ES,	0.959	n/a
3:138289160|138291826	138290108:138290198	A5SS,	0.959	n/a
2:136505837|136519481	136511729:136511847	ES,	0.958	n/a
3:145838899|145842016	145839758:145839820	ES,	0.957	n/a
9:96233423|96261168	96233423:96233669	A5SS,	0.957	n/a
7:152007051|152012423	152012223:152012423	A5SS,	0.956	n/a
12:28458582|28544344	28458582:28458739	A5SS,	0.955	n/a
2:136505837|136519481	136511109:136511137	ES,	0.955	n/a
20:31379407|31380576	31380432:31380576	A3SS,	0.955	n/a
22:30384469|30387659	30387493:30387659	A3SS,	0.955	n/a
4:36212012|36216102	36214018:36214109	ES,	0.955	n/a
5:167915607|167921655	167915607:167915741	A5SS,	0.955	n/a
5:167915607|167921655	167919664:167919852	A3SS,	0.955	n/a
9:74838036|74846097	74842859:74842956	A3SS,	0.953	n/a
X:71681854|71684581	71681854:71681948	A3SS,	0.953	n/a
1:94360170|94367225	94362174:94362376	ES,	0.952	n/a
20:30954187|30978970	30978878:30978970	A3SS,	0.952	n/a
3:11399892|11468400	11421446:11421526	ES,A5SS,	0.952	n/a
5:65307877|65310553	65307877:65307955	A5SS,	0.952	n/a
7:74119496|74133260	74131214:74131270	A3SS,	0.952	n/a
14:50130033|50141145	50136242:50136316	ES,	0.951	n/a
16:16101673|16110478	16108348:16108485	ES,	0.951	n/a
2:122260743|122287901	122273241:122273338	ES,	0.951	n/a
1:8601273|8617582	8616534:8616630	A3SS,	0.95	n/a
2:72692289|72707879	72692289:72692468	A3SS,	0.95	n/a
2:72692289|72707879	72707745:72707879	A5SS,	0.95	n/a
20:25614685|25626284	25615365:25615463	ES,	0.95	n/a
14:102506573|102507010	102506573:102506747	A5SS,	0.949	n/a
3:4403723|4418073	4403723:4403938	A3SS,	0.949	n/a
7:130737184|130738224	130737184:130737314	A3SS,	0.947	n/a
7:80439927|80458061	80439927:80440017	A3SS,	0.947	n/a
14:80963812|80997230	80963812:80963925	A3SS,	0.946	n/a
X:72797243|72804408	72798540:72798621	A3SS,	0.946	n/a
7:2269619|2270362	2270184:2270362	A5SS,	0.945	n/a
9:95030456|95032265	95032167:95032265	A5SS,	0.945	n/a
16:69404386|69406258	69404386:69404532	A3SS,	0.944	n/a
3:52946554|52950230	52946554:52946663	A3SS,	0.944	n/a
4:148860976|148876525	148860976:148861050	A5SS,	0.943	n/a
22:28692186|28702631	28693568:28693840	A3SS,	0.941	n/a
7:17908030|17937069	17913151:17913239	ES,	0.941	n/a
7:6736970|6737442	6737316:6737442	A5SS,	0.941	n/a
17:1746097|1747980	1747214:1747292	A5SS,	0.939	n/a
17:8354098|8363478	8358114:8358205	ES,	0.939	n/a
3:145838899|145842016	145841052:145841112	A3SS,	0.939	n/a
3:32745360|32750312	32746303:32746464	ES,	0.939	n/a
4:3088666|3109150	3105551:3105610	ES,	0.939	n/a
7:17908030|17937069	17932955:17933057	ES,	0.939	n/a
7:17908030|17937069	17931169:17931258	ES,	0.939	n/a
15:72855735|72864506	72862518:72862648	A3SS,	0.938	n/a
18:9775275|9815219	9792151:9792232	ES,	0.938	n/a
4:3088666|3109150	3107084:3107163	ES,	0.938	n/a
6:170852689|170858201	170852689:170852818	A3SS,	0.938	n/a
7:156549087|156619438	156554828:156554892	ES,	0.938	n/a
3:149563798|149639014	149629765:149629870	ES,	0.937	n/a
1:119805525|119820595	119805525:119805567	A5SS,	0.936	n/a
10:74468041|74475660	74475612:74475660	A3SS,	0.934	n/a
17:80858527|80869665	80861281:80861354	ES,	0.934	n/a
21:16386665|16415895	16387466:16387546	ES,	0.934	n/a
6:159004986|159010814	159010704:159010814	A3SS,	0.934	n/a
12:109212025|109212334	109212208:109212334	A5SS,	0.933	n/a
12:112371690|112381173	112371690:112371834	A3SS,	0.933	n/a
16:22260076|22262643	22262472:22262643	A3SS,	0.933	n/a
16:22260076|22262643	22261975:22262012	A5SS,	0.933	n/a
17:80992911|81006661	81006347:81006446	A3SS,	0.933	n/a
6:146209156|146216113	146214351:146214529	ES,	0.933	n/a
1:176132005|176153828	176145046:176145143	ES,	0.931	n/a
11:128993341|129034322	128993783:128993824	ES,	0.931	n/a
6:17665470|17669777	17669206:17669259	ES,	0.93	n/a
1:197621365|197684204	197641167:197641286	A3SS,	0.929	n/a
13:37614542|37625720	37621672:37621738	ES,	0.929	n/a
18:29218607|29246335	29237939:29238052	A3SS,	0.929	n/a
7:17908030|17937069	17936957:17937069	A5SS,	0.929	n/a
8:56854414|56860282	56854414:56854550	A5SS,	0.929	n/a
2:175779786|175816930	175809898:175809989	ES,	0.928	n/a
3:196842798|196846401	196842798:196842954	A3SS,	0.927	n/a
5:76745585|76785397	76749642:76749753	ES,	0.926	n/a
7:103828699|103844682	103835591:103835702	ES,	0.926	n/a
9:33960824|33973235	33963724:33963789	ES,	0.926	n/a
1:212502477|212506940	212502477:212502673	A5SS,	0.923	n/a
1:70758071|70781249	70771907:70771973	ES,	0.923	n/a
12:112371690|112381173	112374496:112374634	ES,	0.923	n/a
3:172499953|172504364	172502497:172502593	ES,	0.923	n/a
3:4403723|4418073	4418014:4418073	A5SS,	0.923	n/a
17:57808782|57816308	57812699:57812834	ES,	0.922	n/a
10:52193236|52350007	52220433:52220574	A3SS,	0.921	n/a
16:47531310|47581459	47536902:47537001	ES,	0.92	n/a
6:170846322|170858201	170852689:170852818	ES,	0.92	n/a
7:158704241|158711560	158706924:158707012	A5SS,	0.92	n/a
14:84112888|84132553	84117565:84117811	ES,	0.919	n/a
8:48192450|48206619	48192450:48192605	A5SS,	0.919	n/a
15:72810408|72853890	72837161:72837305	ES,	0.918	n/a
7:152007051|152012423	152007051:152007160	A3SS,	0.918	n/a
12:49053688|49054402	49054149:49054402	A5SS,	0.917	n/a
15:63845914|63855207	63848866:63848947	A3SS,	0.917	n/a
17:58342773|58348842	58343337:58343452	A3SS,	0.917	n/a
11:46098305|46113774	46112006:46112117	ES,A3SS,	0.912	n/a
8:141889570|141900868	141900642:141900868	IR,	0.912	n/a
17:80842021|80861354	80858527:80858607	ES,A3SS,	0.911	n/a
X:106331666|106332069	106331666:106332069	IR,	0.911	n/a
1:21327692|21329301	21327692:21327805	A3SS,	0.909	n/a
11:103182607|103229087	103228971:103229087	A3SS,	0.909	n/a
2:44436349|44445676	44440835:44440896	ES,	0.909	n/a
21:46538479|46554747	46548317:46548488	A3SS,	0.909	n/a
8:18622959|18662408	18662032:18662112	A3SS,	0.909	n/a
8:18622959|18662408	18662214:18662408	A5SS,	0.909	n/a
9:33960824|33973235	33971649:33971752	A3SS,	0.909	n/a
12:19615444|19626289	19615444:19615651	A5SS,	0.907	n/a
13:37614542|37625720	37622015:37622073	ES,	0.905	n/a
2:215632206|215661841	215657021:215657169	ES,	0.905	n/a
6:17507400|17514185	17507872:17507957	ES,	0.905	n/a
7:156516806|156549159	156518129:156518219	ES,	0.905	n/a
9:96238538|96261168	96261072:96261168	A3SS,	0.905	n/a
14:31841016|31844174	31844022:31844174	A5SS,	0.9	n/a
15:63824846|63855207	63829224:63829355	ES,	0.9	n/a
16:28112779|28113266	28112779:28113009	A3SS,	0.9	n/a
3:149613260|149639014	149613260:149613357	A5SS,	0.9	n/a
7:156516806|156549159	156518458:156518531	A5SS,	0.9	n/a
7:156758964|156759786	156759655:156759786	A3SS,	0.9	n/a
1:231090079|231097049	231090079:231090149	A3SS,	0.897	n/a
21:38792601|38798083	38794884:38794954	ES,	0.897	n/a
22:25771780|25777545	25771780:25771975	A3SS,	0.897	n/a
3:194325016|194331749	194325016:194325174	A3SS,	0.897	n/a
7:156549087|156619438	156589083:156589186	ES,	0.897	n/a
1:44877653|44878394	44877653:44878394	IR,	0.895	n/a
11:34093273|34098189	34097783:34098021	A5SS,	0.895	n/a
20:33065577|33067594	33067435:33067594	A3SS,	0.895	n/a
5:95099212|95119667	95115956:95116129	A5SS,	0.895	n/a
11:75590923|75623083	75590923:75591084	A5SS,	0.889	n/a
13:37614542|37625720	37619384:37619510	A3SS,	0.889	n/a
17:58342773|58348842	58346811:58346918	ES,	0.889	n/a
22:41926691|41936799	41928098:41928161	A3SS,	0.889	n/a
3:149563798|149619949	149613260:149613357	A5SS,	0.889	n/a
3:48215774|48219478	48215774:48215947	A3SS,	0.889	n/a
4:184104556|184114861	184104556:184104622	A5SS,	0.889	n/a
5:108281831|108295048	108290430:108290633	A5SS,	0.889	n/a
7:17908030|17937069	17929986:17930107	ES,	0.889	n/a
7:27668990|27676356	27671955:27672064	A3SS,	0.889	n/a
8:18656805|18662408	18662214:18662408	A5SS,	0.889	n/a
13:61013822|61034674	61018817:61018882	A3SS,	0.886	n/a
5:38523521|38530768	38523521:38523684	A3SS,	0.885	n/a
5:38523521|38530768	38527257:38527396	A5SS,	0.885	n/a
1:47761437|47767420	47765782:47765824	ES,	0.882	n/a
7:152007051|152012423	152008883:152009031	ES,A5SS,	0.882	n/a
7:8043538|8110761	8062113:8062199	ES,	0.882	n/a
6:158994452|159010814	159004986:159005076	ES,	0.881	n/a
5:619105|620376	620184:620376	A3SS,	0.88	n/a
11:34991686|35006275	34999671:34999729	ES,	0.879	n/a
12:111991962|111993723	111992670:111992878	A3SS,	0.879	n/a
12:28458582|28544344	28515371:28515448	ES,	0.879	n/a
12:70671912|70704797	70688017:70688074	A3SS,	0.878	n/a
1:11181303|11182183	11181303:11181425	A3SS,	0.875	n/a
1:231081135|231097049	231090079:231090149	A3SS,	0.875	n/a
10:75156277|75160615	75157939:75158143	A5SS,	0.875	n/a
14:62193424|62194373	62194171:62194373	A3SS,	0.875	n/a
14:76633006|76662315	76647107:76647192	ES,	0.875	n/a
17:1746097|1756483	1747214:1747292	A5SS,	0.875	n/a
17:42231924|42232779	42232117:42232306	A3SS,	0.875	n/a
17:46189393|46190763	46189393:46189447	A5SS,	0.875	n/a
20:10536879|10541468	10541348:10541468	A3SS,	0.875	n/a
21:16386665|16417644	16387466:16387546	ES,	0.875	n/a
3:52946554|52947633	52946554:52946663	A3SS,	0.875	n/a
7:156516806|156619438	156526871:156526951	ES,	0.875	n/a
21:38792601|38802702	38797992:38798083	ES,	0.874	n/a
12:51173923|51203372	51189692:51189792	A3SS,	0.87	n/a
2:228356263|228389631	228384664:228384779	ES,	0.87	n/a
3:138407717|138413749	138409842:138409985	A3SS,	0.87	n/a
1:176118142|176153828	176145046:176145143	ES,	0.867	n/a
1:21415631|21437876	21431610:21431751	ES,	0.867	n/a
1:42693554|42744343	42730786:42730860	ES,	0.867	n/a
19:9767223|9771550	9768685:9768811	ES,	0.867	n/a
3:119219542|119222868	119222801:119222868	A3SS,	0.867	n/a
3:196098767|196129890	196120425:196120490	A5SS,	0.867	n/a
3:47079156|47088111	47079156:47079267	A3SS,	0.867	n/a
4:106367540|106377902	106377405:106377448	ES,	0.867	n/a
7:8043538|8110761	8095066:8095179	A3SS,	0.867	n/a
8:141840571|141900868	141856359:141856421	ES,	0.864	n/a
1:21377359|21415706	21415631:21415706	A5SS,	0.862	n/a
11:86778736|86802437	86778736:86778863	A5SS,	0.862	n/a
11:86778736|86802437	86782565:86782657	ES,A3SS,	0.862	n/a
1:62713144|62717142	62713144:62713344	A3SS,	0.857	n/a
10:93902786|93952393	93952303:93952393	A5SS,	0.857	n/a
10:96201653|96204296	96204228:96204296	A3SS,	0.857	n/a
17:4186093|4210418	4200012:4200109	ES,	0.857	n/a
17:58756814|58786686	58761343:58761397	ES,	0.857	n/a
19:23556544|23557566	23556544:23556639	A3SS,	0.857	n/a
2:70451686|70463307	70463211:70463307	A5SS,	0.857	n/a
20:37612342|37623523	37617436:37617560	A3SS,	0.857	n/a
21:38792601|38802702	38801169:38801210	ES,	0.857	n/a
3:47762156|47787483	47770515:47770584	ES,	0.857	n/a
3:57569625|57570191	57569625:57569734	A3SS,	0.857	n/a
4:184774033|184774996	184774857:184774996	A3SS,	0.857	n/a
5:74715166|74722303	74721117:74721324	A5SS,	0.857	n/a
7:24663282|24681487	24681335:24681487	A3SS,	0.857	n/a
7:64004085|64004810	64004684:64004810	A5SS,	0.857	n/a
2:228356263|228389631	228388479:228388641	A3SS,	0.854	n/a
11:85707869|85714494	85711686:85711822	ES,	0.852	n/a
7:6472468|6476164	6474393:6474651	A5SS,	0.852	n/a
8:128174167|128186609	128181143:128181362	ES,	0.852	n/a
13:96636058|96651561	96642227:96642327	ES,	0.85	n/a
9:74825603|74834422	74828802:74828907	A3SS,	0.85	n/a
14:73614503|73614814	73614675:73614814	A3SS,	0.846	n/a
19:17387304|17387718	17387304:17387718	IR,	0.846	n/a
2:78225204|78252550	78226102:78226166	ES,	0.846	n/a
9:114148657|114154104	114152264:114152381	ES,A3SS,	0.846	n/a
2:61749746|61753656	61752405:61752468	ES,	0.845	n/a
17:80842021|80869665	80851423:80851508	ES,	0.843	n/a
20:33065577|33067594	33065577:33065665	A5SS,	0.842	n/a
12:29812813|29814312	29812813:29812916	A3SS,	0.84	n/a
11:12883797|12886447	12886233:12886447	IR,	0.838	n/a
6:47471016|47472494	47471731:47471790	ES,	0.835	n/a
1:235582788|235590554	235590455:235590554	A3SS,	0.833	n/a
1:6007164|6022009	6012760:6012896	ES,	0.833	n/a
10:69797850|69804320	69799156:69799245	ES,A5SS,	0.833	n/a
11:77435393|77436744	77436590:77436744	A5SS,	0.833	n/a
12:47497896|47501947	47499831:47499907	ES,	0.833	n/a
15:73052748|73067438	73064124:73064186	ES,	0.833	n/a
15:89790860|89804074	89790860:89790962	A5SS,	0.833	n/a
17:44143903|44172067	44159807:44159908	ES,A3SS,	0.833	n/a
17:60106902|60112969	60107212:60107374	ES,	0.833	n/a
19:9767223|9771550	9768901:9768965	ES,	0.833	n/a
2:120885264|120932580	120925453:120925583	ES,	0.833	n/a
2:191068504|191077801	191069826:191069958	A5SS,	0.833	n/a
22:48081949|48082955	48082298:48082444	A3SS,	0.833	n/a
5:41794105|41807540	41805669:41805783	A5SS,	0.833	n/a
7:156516806|156556489	156518458:156518531	ES,	0.833	n/a
7:157013383|157024021	157013383:157013470	A5SS,	0.833	n/a
8:141828376|141900868	141840571:141840625	ES,	0.833	n/a
9:127446880|127447265	127446880:127446961	A3SS,	0.833	n/a
9:74823141|74828907	74823141:74823210	A5SS,	0.833	n/a
X:24190832|24197887	24197300:24197887	A3SS,	0.833	n/a
11:61133517|61135470	61134900:61135470	IR,	0.83	n/a
3:57875768|57882659	57881974:57882098	ES,	0.83	n/a
11:85685751|85695016	85687666:85687725	ES,	0.826	n/a
7:27668990|27689252	27671955:27672064	A3SS,	0.825	n/a
14:71880665|71933964	71933764:71933964	A3SS,	0.824	n/a
1:155747413|155753880	155747413:155747611	A3SS,	0.818	n/a
12:100598718|100601564	100599454:100599522	A5SS,	0.818	n/a
16:87760371|87764250	87762916:87762970	A3SS,	0.818	n/a
17:80842021|80869665	80847544:80847573	ES,	0.818	n/a
3:169854207|169867032	169854207:169854453	A3SS,	0.818	n/a
4:184104556|184114861	184107980:184108097	ES,	0.818	n/a
X:22129585|22151741	22132576:22132704	ES,	0.818	n/a
14:71880665|71996087	71884847:71884913	ES,A3SS,	0.817	n/a
10:530721|532470	532399:532470	A5SS,	0.815	n/a
X:1404671|1409402	1407412:1407535	ES,	0.812	n/a
14:39620950|39628754	39628687:39628754	A5SS,	0.81	n/a
16:88008654|88017865	88008654:88008791	A5SS,	0.805	n/a
7:22999875|23030758	23000854:23000941	ES,	0.805	n/a
X:71681854|71684581	71682212:71682292	ES,	0.802	n/a
1:21327692|21437876	21329206:21329301	ES,	0.8	n/a
1:94360170|94370144	94362174:94362376	ES,	0.8	n/a
10:5827105|5842668	5836848:5836982	ES,	0.8	n/a
10:93902786|93911113	93904702:93904869	A3SS,	0.8	n/a
12:112086984|112087575	112087379:112087575	A3SS,	0.8	n/a
12:123825535|123834988	123829805:123830114	A5SS,	0.8	n/a
12:27521195|27533337	27530374:27530497	ES,	0.8	n/a
12:28408514|28460682	28459743:28459878	A3SS,	0.8	n/a
12:72051306|72054207	72051306:72051424	A3SS,	0.8	n/a
15:76580187|76588078	76584960:76585041	ES,	0.8	n/a
16:16101673|16130460	16126966:16127027	ES,	0.8	n/a
16:21350242|21363459	21353829:21353907	ES,	0.8	n/a
16:7926082|7944397	7929541:7929773	A3SS,	0.8	n/a
17:27809215|27818883	27818802:27818883	A3SS,	0.8	n/a
17:80851423|80861354	80858527:80858607	A3SS,	0.8	n/a
2:61340905|61345251	61343114:61343205	A3SS,	0.8	n/a
2:61340905|61345251	61340905:61340989	A5SS,	0.8	n/a
4:83799883|83803093	83799883:83800081	A3SS,	0.8	n/a
5:137733867|137735701	137733867:137734081	A5SS,	0.8	n/a
5:619105|624694	620184:620376	A3SS,	0.8	n/a
5:619105|624694	619105:619232	A5SS,	0.8	n/a
6:99992988|99999771	99998094:99998169	A3SS,	0.8	n/a
7:156516806|156556489	156518129:156518219	ES,	0.8	n/a
7:156516806|156619438	156589083:156589186	ES,	0.8	n/a
8:141749117|141762415	141754751:141754866	ES,	0.8	n/a
8:141828376|141900868	141856359:141856421	ES,	0.8	n/a
8:141874411|141935848	141889570:141889736	ES,	0.8	n/a
8:142170731|142173528	142173432:142173528	A3SS,	0.8	n/a
X:71681854|71708891	71682212:71682292	ES,	0.8	n/a
3:3178944|3182332	3178944:3179137	A5SS,	0.789	n/a
15:25650608|25660989	25660857:25660989	A5SS,	0.786	n/a
22:40948110|40990739	40982037:40982116	ES,	0.786	n/a
20:10536879|10541468	10541089:10541139	ES,	0.785	n/a
9:88284400|88296250	88287465:88287596	ES,	0.784	n/a
12:29812813|29814312	29813562:29813637	ES,	0.783	n/a
11:11895347|11901927	11895347:11895406	A5SS,	0.781	n/a
1:245165423|245180628	245180184:245180281	ES,	0.778	n/a
13:37614542|37625720	37622701:37622736	ES,	0.778	n/a
14:39620950|39628754	39623415:39623498	ES,	0.778	n/a
14:56114743|56115588	56114743:56114833	A5SS,	0.778	n/a
15:65772560|65773953	65773853:65773953	A5SS,	0.778	n/a
15:72300167|72320134	72311380:72311436	ES,	0.778	n/a
17:57808782|57816308	57814814:57814904	ES,	0.778	n/a
5:64976321|64981299	64976321:64976383	A3SS,	0.778	n/a
5:92889467|92899169	92890833:92890907	ES,A3SS,	0.778	n/a
8:128231055|128236720	128235783:128235911	A3SS,	0.778	n/a
X:80064512|80064803	80064512:80064803	IR,	0.771	n/a
1:247320386|247323115	247320386:247320519	A3SS,	0.769	n/a
7:74119496|74131270	74129177:74129236	ES,	0.769	n/a
13:96622366|96648389	96642227:96642327	ES,	0.765	n/a
14:105692406|105693097	105692588:105692627	ES,	0.765	n/a
7:77407655|77408131	77407951:77408131	A3SS,	0.765	n/a
22:30353025|30375041	30366965:30367051	ES,	0.76	n/a
1:155638418|155640255	155638418:155638568	A3SS,	0.75	n/a
1:38047824|38049534	38049295:38049382	A3SS,	0.75	n/a
10:69902697|69909868	69908110:69908224	ES,	0.75	n/a
10:74468041|74496329	74475612:74475660	A3SS,	0.75	n/a
10:74764700|74776657	74768003:74768050	A5SS,	0.75	n/a
10:74764700|74776657	74764700:74764757	A3SS,	0.75	n/a
11:18010144|18029623	18010144:18010222	A3SS,	0.75	n/a
11:85692788|85695016	85692915:85693031	A3SS,	0.75	n/a
11:85707869|85742653	85711686:85711822	ES,	0.75	n/a
11:9308002|9321248	9309989:9310089	A3SS,	0.75	n/a
12:111920591|111924628	111923069:111923135	A5SS,	0.75	n/a
13:111274563|111279894	111277537:111277625	ES,	0.75	n/a
13:114164553|114175048	114170358:114170422	ES,	0.75	n/a
13:51501543|51523641	51503611:51503718	A3SS,	0.75	n/a
16:28498777|28500707	28500611:28500707	A5SS,	0.75	n/a
17:4186093|4200104	4186093:4186205	A3SS,	0.75	n/a
17:46189393|46190763	46189936:46190022	A3SS,	0.75	n/a
17:53478830|53481229	53479575:53479664	A5SS,	0.75	n/a
20:32207323|32216241	32212570:32212823	ES,	0.75	n/a
20:34304662|34313077	34309633:34309799	A5SS,	0.75	n/a
20:39896103|39897723	39897619:39897723	A5SS,	0.75	n/a
22:29517345|29521404	29517345:29517469	A5SS,	0.75	n/a
22:46493806|46505788	46499072:46499129	A5SS,	0.75	n/a
3:124576079|124578293	124576079:124576160	A3SS,	0.75	n/a
3:196817783|196846401	196842798:196842954	A3SS,	0.75	n/a
4:106613133|106614643	106613133:106613207	A3SS,	0.75	n/a
4:123900387|124011860	123940317:123940404	ES,	0.75	n/a
4:186168448|186188309	186176837:186176896	A3SS,	0.75	n/a
4:85815978|85853516	85815978:85816093	A3SS,	0.75	n/a
5:158871658|158877741	158872097:158872239	A5SS,	0.75	n/a
5:76745585|76785397	76760586:76760634	ES,	0.75	n/a
7:105192017|105195674	105195475:105195674	A3SS,	0.75	n/a
7:105192017|105195674	105192017:105192154	A5SS,	0.75	n/a
7:156516806|156549159	156521338:156521414	ES,	0.75	n/a
7:156758964|156759786	156758964:156759096	A5SS,	0.75	n/a
7:74103458|74105443	74103458:74103561	A5SS,	0.75	n/a
8:141889570|141900868	141900642:141900702	A3SS,	0.75	n/a
9:100839200|100840629	100840344:100840629	A3SS,	0.75	n/a
9:125751576|125752492	125751576:125751750	A5SS,	0.75	n/a
9:125751576|125752492	125752335:125752492	A3SS,	0.75	n/a
9:74823141|74834422	74823141:74823210	A5SS,	0.75	n/a
11:117023157|117034608	117031861:117031977	ES,	0.739	n/a
13:113170754|113181798	113174200:113174335	ES,	0.739	n/a
22:46085592|46125470	46114293:46114373	ES,	0.738	n/a
1:224437914|224455835	224454706:224454925	ES,	0.733	n/a
21:16386665|16415891	16387466:16387546	ES,	0.733	n/a
21:45165960|45168961	45166997:45167173	ES,	0.733	n/a
1:176132005|176153828	176132963:176133027	A5SS,	0.727	n/a
11:85692172|85695016	85692915:85693046	A3SS,	0.727	n/a
4:30921775|30924205	30921775:30921991	A5SS,	0.727	n/a
2:10784446|10808849	10794607:10794673	ES,	0.724	n/a
6:30618771|30619243	30618771:30618877	A5SS,	0.722	n/a
7:138951079|138957186	138954140:138954269	A3SS,	0.722	n/a
6:150092298|150094305	150093150:150093383	ES,	0.72	n/a
1:10327438|10328321	10327438:10327616	A5SS,	0.714	n/a
1:84644860|84650865	84649720:84649818	ES,	0.714	n/a
11:86267595|86270865	86268994:86269035	ES,	0.714	n/a
12:28378728|28460682	28412297:28412375	ES,	0.714	n/a
12:28378728|28460682	28410135:28410178	ES,	0.714	n/a
12:50488220|50490755	50490633:50490755	A3SS,	0.714	n/a
15:56311594|56454438	56451457:56451510	ES,	0.714	n/a
15:83301923|83310433	83307316:83307385	ES,	0.714	n/a
16:16101673|16102021	16101944:16102021	A3SS,	0.714	n/a
17:18210205|18212255	18211665:18211738	A5SS,	0.714	n/a
17:57158458|57165768	57161363:57161450	ES,	0.714	n/a
18:19102619|19112821	19102619:19102819	A5SS,	0.714	n/a
2:183817133|183818059	183817987:183818059	A5SS,	0.714	n/a
2:204267299|204291992	204281631:204281804	A3SS,	0.714	n/a
2:36605500|36623930	36615115:36615218	ES,	0.714	n/a
2:45773871|45780869	45778264:45778421	ES,	0.714	n/a
4:13338517|13383218	13338517:13338653	A3SS,	0.714	n/a
6:159001972|159029782	159004986:159005076	ES,	0.714	n/a
7:156516806|156619438	156556363:156556489	ES,	0.714	n/a
9:136790965|136804341	136791338:136791449	ES,	0.714	n/a
9:88284400|88296250	88292351:88292497	A3SS,	0.714	n/a
21:38792601|38802702	38794076:38794168	ES,A3SS,	0.707	n/a
10:116719485|116734144	116731894:116732033	A3SS,	0.706	n/a
14:39620950|39628754	39627489:39627606	ES,	0.704	n/a
3:197592294|197602646	197592983:197593090	ES,	0.704	n/a
17:59853762|59857762	59857392:59857762	IR,	0.7	n/a
22:47022648|47033857	47022648:47022858	A5SS,	0.7	n/a
3:3819409|3830758	3824187:3824385	ES,A3SS,	0.7	n/a
9:33953283|33973235	33971649:33971752	A3SS,	0.7	n/a
13:61013822|61041513	61018817:61018882	A3SS,	0.694	n/a
1:21377359|21437876	21415631:21415706	ES,	0.692	n/a
1:247319708|247323115	247319708:247320519	A3SS,	0.692	n/a
1:41578955|41582682	41578955:41579198	A3SS,	0.692	n/a
1:70758071|70781249	70779428:70779473	ES,	0.692	n/a
13:31789188|31803431	31797871:31797963	ES,	0.692	n/a
14:64568650|64574325	64568650:64568760	A5SS,	0.692	n/a
14:71880665|71933964	71884847:71884913	ES,	0.692	n/a
19:9767223|9770143	9768901:9768965	ES,	0.692	n/a
2:24357989|24369956	24369618:24369705	ES,	0.692	n/a
20:35236118|35238133	35236118:35236403	IR,	0.692	n/a
3:36524484|36527741	36527286:36527417	ES,	0.692	n/a
7:56045819|56052571	56046043:56046088	ES,	0.692	n/a
7:158528194|158531812	158529739:158529870	A3SS,	0.688	n/a
1:247320302|247323115	247320302:247320519	A3SS,	0.684	n/a
17:80842021|80869665	80863812:80863929	ES,	0.684	n/a
4:89570991|89579642	89577026:89577186	ES,	0.684	n/a
4:88005272|88012981	88010689:88010842	ES,A3SS,	0.683	n/a
11:85685751|85695016	85692915:85693031	A3SS,	0.682	n/a
10:518379|532470	530721:530888	ES,	0.68	n/a
14:70442432|70461197	70442432:70442531	A5SS,	0.68	n/a
2:9419446|9437574	9427133:9427241	ES,	0.677	n/a
13:33091994|33101669	33101545:33101669	A5SS,	0.676	n/a
9:125042722|125054119	125048318:125048445	ES,	0.674	n/a
1:212502477|212515622	212502477:212502673	A5SS,	0.667	n/a
1:235505023|235506198	235505326:235505641	A5SS,	0.667	n/a
1:235582732|235597595	235594020:235594119	ES,	0.667	n/a
1:40654727|40668286	40668084:40668286	A3SS,	0.667	n/a
1:6867043|6948959	6931817:6931900	ES,	0.667	n/a
10:5751493|5754881	5754357:5754502	ES,	0.667	n/a
10:5751493|5756170	5754357:5754502	ES,	0.667	n/a
11:28711070|28763455	28711324:28711485	A5SS,	0.667	n/a
12:102419752|102439897	102433646:102433756	ES,	0.667	n/a
12:109210814|109212334	109212208:109212334	A5SS,	0.667	n/a
12:124130002|124137282	124137079:124137108	A3SS,	0.667	n/a
12:124130002|124137282	124135541:124135603	A5SS,	0.667	n/a
12:19615444|19636987	19615444:19615651	A5SS,	0.667	n/a
12:29812813|29814312	29814251:29814312	A5SS,	0.667	n/a
12:50829271|50835426	50831518:50831621	ES,	0.667	n/a
14:75505043|75509180	75506614:75506718	ES,	0.667	n/a
14:81329101|81366373	81362062:81362134	A3SS,	0.667	n/a
16:56969147|56970729	56970551:56970729	A3SS,	0.667	n/a
17:57158458|57165768	57158458:57158580	A3SS,	0.667	n/a
19:2213538|2214595	2213848:2213985	ES,	0.667	n/a
19:9767223|9770143	9768685:9768866	A3SS,	0.667	n/a
2:170885856|170917953	170897392:170897495	A3SS,	0.667	n/a
2:176844538|176859008	176858873:176859008	A5SS,	0.667	n/a
2:225421012|225422573	225421012:225421137	A3SS,	0.667	n/a
2:39526884|39542529	39530215:39530258	ES,	0.667	n/a
2:70451686|70457986	70457888:70457986	A5SS,	0.667	n/a
20:43703659|43706602	43703659:43703998	A5SS,	0.667	n/a
3:172499953|172504364	172504283:172504364	A3SS,	0.667	n/a
3:194169186|194175121	194174435:194174507	ES,	0.667	n/a
4:148860976|148944564	148860976:148861050	A5SS,	0.667	n/a
4:41475022|41496623	41478363:41478431	ES,	0.667	n/a
5:109049221|109051965	109051821:109051965	A3SS,	0.667	n/a
5:111594926|111616020	111615965:111616020	A5SS,	0.667	n/a
5:118264232|118280344	118279495:118279597	ES,	0.667	n/a
5:131034610|131044965	131044894:131044965	A5SS,	0.667	n/a
6:84108086|84117620	84111923:84112021	ES,	0.667	n/a
7:156516806|156556489	156520624:156520701	ES,	0.667	n/a
8:131226802|131249240	131226802:131226947	A3SS,	0.667	n/a
8:131226802|131249240	131249168:131249240	A5SS,	0.667	n/a
8:141828376|141900868	141856698:141856777	ES,	0.667	n/a
9:114332371|114348445	114341076:114341231	A5SS,	0.667	n/a
9:114332371|114348445	114337014:114337122	A3SS,	0.667	n/a
9:114820708|114825313	114820708:114820885	A3SS,	0.667	n/a
9:20874680|20885229	20885146:20885229	A3SS,	0.667	n/a
9:36594625|36607670	36607572:36607670	A3SS,	0.667	n/a
15:90414707|90432372	90420538:90420656	ES,	0.663	n/a
19:17387304|17387718	17387632:17387718	A3SS,	0.656	n/a
12:109212025|109217137	109212212:109212334	A5SS,	0.652	n/a
3:31917925|31921322	31920922:31921045	ES,	0.652	n/a
12:13093450|13100172	13097302:13097410	A5SS,	0.647	n/a
12:13093450|13100172	13100132:13100172	A3SS,	0.647	n/a
5:74109665|74137504	74135899:74135998	ES,	0.647	n/a
9:95018962|95022516	95020086:95020268	ES,	0.647	n/a
3:52156395|52159197	52157549:52157615	A5SS,	0.643	n/a
1:84644860|84680000	84668366:84668488	ES,	0.636	n/a
10:15858834|15885271	15880227:15880278	ES,	0.636	n/a
12:122332645|122341013	122337540:122337751	ES,	0.636	n/a
12:27867713|27890541	27888380:27888489	ES,	0.636	n/a
3:56703728|56707753	56704101:56704173	ES,	0.636	n/a
7:50771518|50778687	50772837:50773020	ES,	0.636	n/a
7:8062113|8110761	8099726:8099878	A5SS,	0.636	n/a
8:42761316|42785315	42783869:42783953	ES,	0.636	n/a
9:127446880|127495628	127446880:127447014	A3SS,	0.636	n/a
12:109210814|109217137	109212212:109212334	A5SS,	0.625	n/a
12:112370390|112381173	112370390:112370463	A3SS,	0.625	n/a
14:73614503|73640415	73614675:73614802	A5SS,	0.625	n/a
17:40650942|40653322	40653227:40653322	A3SS,	0.625	n/a
17:80828100|80858607	80847544:80847573	ES,	0.625	n/a
20:33954360|33981999	33961987:33962059	ES,	0.625	n/a
22:22153301|22162135	22161953:22162135	A5SS,	0.625	n/a
22:22153301|22162135	22160139:22160328	A3SS,	0.625	n/a
4:139993020|139994721	139993020:139993157	A3SS,	0.625	n/a
5:41794105|41807540	41794779:41794851	ES,	0.625	n/a
6:141125372|141137367	141126955:141127023	ES,	0.625	n/a
6:42941741|42942776	42941741:42941824	A3SS,	0.625	n/a
21:38792601|38845182	38794076:38794168	ES,	0.619	n/a
9:100839200|100840629	100840048:100840168	ES,	0.619	n/a
17:59853762|59857762	59853762:59853863	A3SS,	0.618	n/a
10:52193236|52350007	52226650:52226692	ES,	0.611	n/a
13:100953714|100962162	100958005:100958088	ES,	0.611	n/a
16:21326632|21328447	21327205:21327291	A3SS,	0.611	n/a
8:37623044|37623873	37623044:37623264	IR,	0.603	n/a
1:10155519|10165802	10161166:10161253	A5SS,	0.6	n/a
1:151611364|151655921	151640948:151641111	ES,	0.6	n/a
1:197611841|197643299	197614820:197614873	ES,	0.6	n/a
1:197611841|197742062	197627430:197627499	ES,	0.6	n/a
1:225140372|225156576	225155133:225155285	A5SS,	0.6	n/a
1:225270251|225284941	225275728:225275831	ES,	0.6	n/a
1:46120215|46124814	46120862:46120991	ES,	0.6	n/a
10:18898774|18905222	18903389:18903542	A5SS,	0.6	n/a
11:117023157|117034608	117030650:117030739	ES,	0.6	n/a
11:85707869|85742653	85712078:85712201	ES,	0.6	n/a
12:102650993|102676076	102673325:102673462	ES,	0.6	n/a
12:129293333|129299615	129294488:129294656	A3SS,	0.6	n/a
13:108269565|108287727	108287645:108287727	A5SS,	0.6	n/a
13:108269565|108287727	108271699:108271872	ES,	0.6	n/a
14:32241022|32257079	32256986:32257079	A3SS,	0.6	n/a
15:25650608|25671366	25660857:25660989	ES,	0.6	n/a
15:94983405|95001475	94986148:94986189	ES,	0.6	n/a
17:19843026|19850818	19844229:19844323	ES,	0.6	n/a
17:77642782|77653884	77647069:77647218	ES,	0.6	n/a
2:197777606|197787849	197786827:197786910	A3SS,	0.6	n/a
2:32399132|32409407	32402546:32402665	ES,	0.6	n/a
2:77968647|77972614	77972400:77972614	A5SS,	0.6	n/a
21:46548317|46554747	46554672:46554747	A3SS,	0.6	n/a
3:149563798|149639014	149613260:149613357	A5SS,	0.6	n/a
3:196118684|196120490	196120425:196120490	A5SS,	0.6	n/a
3:93714718|93722752	93716091:93716145	ES,	0.6	n/a
3:9495423|9506356	9495689:9495785	ES,	0.6	n/a
4:114452372|114469885	114468800:114468872	ES,	0.6	n/a
6:10702602|10702872	10702602:10702872	IR,	0.6	n/a
6:74190398|74191967	74191763:74191967	A3SS,	0.6	n/a
X:71681854|71694579	71694430:71694579	A5SS,	0.6	n/a
10:15858834|15889942	15863655:15863725	ES,	0.596	n/a
1:155891166|155891709	155891166:155891318	A3SS,	0.594	n/a
10:93902786|93940776	93904702:93904869	A3SS,	0.594	n/a
8:141856359|141900868	141889570:141889736	ES,	0.591	n/a
10:52193236|52350007	52279591:52279681	ES,A5SS,	0.588	n/a
4:115380370|115412085	115404623:115404734	ES,	0.586	n/a
16:532525|546859	541134:541268	ES,	0.583	n/a
9:115024715|115060196	115060121:115060196	A5SS,	0.583	n/a
1:231090079|231097049	231092167:231092228	ES,A3SS,	0.579	n/a
14:59730159|59758024	59730930:59731003	ES,	0.579	n/a
1:16119332|16123438	16119332:16119550	A3SS,	0.571	n/a
1:41578955|41608784	41578955:41579198	A3SS,	0.571	n/a
1:97839117|97848017	97843261:97843483	A5SS,	0.571	n/a
10:93768586|93768965	93768586:93768965	IR,	0.571	n/a
11:120916383|120924441	120924260:120924441	A3SS,	0.571	n/a
11:120916383|120930794	120924260:120924441	A3SS,	0.571	n/a
15:77656416|77657567	77656416:77656597	A3SS,	0.571	n/a
17:80847544|80861354	80858527:80858607	A3SS,	0.571	n/a
2:240078348|240085619	240085499:240085619	A5SS,	0.571	n/a
4:128590191|128609022	128608833:128609022	A3SS,	0.571	n/a
5:134041017|134044578	134044481:134044578	A3SS,	0.571	n/a
6:42559889|42562042	42560599:42560697	ES,	0.571	n/a
7:16720926|16729531	16725530:16725665	ES,	0.571	n/a
7:8043538|8110761	8110713:8110761	A3SS,	0.571	n/a
9:20881870|20916936	20885108:20885229	A3SS,	0.571	n/a
12:28378728|28412375	28379073:28379132	ES,	0.566	n/a
12:65720606|65762806	65753285:65753482	ES,A5SS,	0.565	n/a
8:38947566|38948865	38947566:38947707	A5SS,	0.565	n/a
8:141874411|141900868	141889570:141889736	ES,	0.564	n/a
7:156516806|156619438	156518458:156518531	ES,A5SS,	0.562	n/a
1:10327438|10328321	10327972:10328069	ES,	0.556	n/a
10:64148155|64219556	64158499:64158536	ES,	0.556	n/a
11:78176922|78204241	78189484:78189521	A3SS,	0.556	n/a
16:31733947|31734674	31734382:31734674	A3SS,	0.556	n/a
17:18768782|18775962	18770595:18770647	ES,	0.556	n/a
18:76856476|76914555	76873241:76873354	ES,	0.556	n/a
2:24357989|24369956	24362240:24362320	ES,	0.556	n/a
4:13338517|13383218	13339028:13339127	ES,	0.556	n/a
5:64976321|64981299	64976483:64976621	A5SS,	0.556	n/a
7:156516806|156619438	156555802:156555870	ES,	0.556	n/a
8:128174167|128186609	128176683:128176771	ES,	0.556	n/a
11:66589114|66595835	66595737:66595835	A3SS,	0.545	n/a
13:43986052|43987124	43986553:43986591	ES,	0.545	n/a
14:61497163|61512885	61503777:61503859	ES,	0.545	n/a
14:75506614|75509180	75506614:75506718	A3SS,	0.545	n/a
4:115380370|115412085	115406806:115406883	ES,A3SS,	0.545	n/a
8:128231055|128236720	128231055:128231211	A3SS,	0.545	n/a
14:93685558|93686757	93686595:93686757	A3SS,	0.538	n/a
15:57383987|57490023	57458600:57458664	ES,	0.538	n/a
3:65606749|65607763	65606749:65606801	A3SS,	0.538	n/a
4:85818064|85853516	85822401:85822532	ES,	0.538	n/a
5:136794690|136795421	136795309:136795421	A5SS,	0.538	n/a
6:151226786|151247431	151243341:151243438	ES,	0.538	n/a
9:115030329|115060196	115038124:115038293	ES,	0.538	n/a
12:11181000|11199787	11187381:11187484	ES,	0.537	n/a
12:70193989|70195501	70193989:70194117	A5SS,	0.537	n/a
11:36103203|36120011	36103775:36103877	ES,	0.535	n/a
22:46085592|46125470	46098569:46098727	ES,	0.533	n/a
10:114286846|114298089	114296362:114296460	ES,	0.532	n/a
9:102814699|102822454	102816319:102816449	ES,A3SS,	0.531	n/a
2:207144264|207146633	207145274:207145317	ES,	0.529	n/a
1:63944435|63955889	63952240:63952444	ES,	0.526	n/a
7:156516806|156619438	156518129:156518219	ES,	0.525	n/a
12:116668338|116675510	116669864:116669961	ES,	0.524	n/a
3:182804481|182810333	182808724:182808819	ES,	0.524	n/a
17:80842021|80869665	80865637:80865697	ES,	0.52	n/a
22:50810449|50832564	50830296:50830444	ES,	0.52	n/a
1:220355599|220356273	220356060:220356273	A5SS,	0.5	n/a
1:220355599|220356273	220355599:220355692	A3SS,	0.5	n/a
1:220355599|220356273	220356056:220356273	A5SS,	0.5	n/a
1:220355599|220356273	220355599:220355696	A3SS,	0.5	n/a
10:12833157|12858327	12857978:12858113	ES,	0.5	n/a
10:35349802|35360267	35349802:35349852	A3SS,	0.5	n/a
10:35349802|35360267	35349802:35349896	A3SS,	0.5	n/a
10:65140078|65229368	65169623:65169748	ES,	0.5	n/a
10:75601927|75632841	75612950:75613004	ES,	0.5	n/a
11:61205097|61205834	61205692:61205834	A3SS,	0.5	n/a
11:61205097|61205834	61205767:61205834	A3SS,	0.5	n/a
11:77085373|77103583	77102360:77102414	ES,	0.5	n/a
11:78176922|78189729	78189484:78189521	A3SS,	0.5	n/a
11:78176922|78189729	78189484:78189516	A3SS,	0.5	n/a
11:85692788|85701442	85692915:85693046	A3SS,	0.5	n/a
11:85692788|85701442	85692915:85693031	A3SS,	0.5	n/a
11:85692788|85707972	85701293:85701442	ES,	0.5	n/a
11:85722073|85742653	85737334:85737409	ES,	0.5	n/a
12:12992008|12999533	12999273:12999533	A3SS,	0.5	n/a
12:12992008|12999533	12992008:12992142	A5SS,	0.5	n/a
12:12992008|12999533	12999269:12999533	A3SS,	0.5	n/a
12:12992008|12999533	12992008:12992138	A5SS,	0.5	n/a
12:19615444|19636987	19619682:19619784	ES,	0.5	n/a
12:27521195|27530497	27529279:27529349	A5SS,	0.5	n/a
12:27521195|27530497	27529279:27529320	A5SS,	0.5	n/a
12:32861087|32871697	32866143:32866305	ES,	0.5	n/a
12:32861087|32871697	32862478:32862541	ES,	0.5	n/a
12:70903992|70916410	70906965:70907007	ES,	0.5	n/a
14:65922339|65931191	65931097:65931191	A3SS,	0.5	n/a
14:65922339|65931191	65927806:65927869	ES,	0.5	n/a
14:65922339|65931191	65931093:65931191	A3SS,	0.5	n/a
14:67431908|67490392	67452625:67452717	ES,	0.5	n/a
14:71880665|71979562	71970329:71970385	ES,	0.5	n/a
14:71880665|71979562	71948872:71948928	ES,	0.5	n/a
15:56448714|56472765	56451871:56452035	A3SS,	0.5	n/a
15:56448714|56472765	56451966:56452035	A3SS,	0.5	n/a
15:63829224|63829866	63829820:63829866	A3SS,	0.5	n/a
15:63829224|63829866	63829815:63829866	A3SS,	0.5	n/a
15:72837161|72859518	72855735:72855841	ES,	0.5	n/a
15:72837161|72864506	72855735:72855841	ES,	0.5	n/a
16:7929541|7944397	7929541:7929773	A3SS,	0.5	n/a
16:7929541|7944397	7929541:7929796	A3SS,	0.5	n/a
17:41456120|41456630	41456120:41456224	A3SS,	0.5	n/a
17:41456120|41456630	41456120:41456253	A3SS,	0.5	n/a
17:59821793|59857762	59853762:59853923	A3SS,	0.5	n/a
17:59821793|59857762	59853762:59853863	A3SS,	0.5	n/a
18:19116003|19120661	19120598:19120661	A5SS,	0.5	n/a
18:19116003|19120661	19120538:19120661	A5SS,	0.5	n/a
18:19345733|19359646	19359442:19359646	A3SS,	0.5	n/a
18:19345733|19359646	19359534:19359646	A3SS,	0.5	n/a
19:21558040|21558766	21558671:21558766	A3SS,	0.5	n/a
19:21558040|21558766	21558688:21558766	A3SS,	0.5	n/a
2:169404106|169417832	169416944:169417047	ES,	0.5	n/a
2:70451686|70456450	70452597:70452700	ES,	0.5	n/a
2:77922883|77933959	77924229:77924358	ES,	0.5	n/a
22:41979963|41980607	41980285:41980376	A3SS,	0.5	n/a
22:41979963|41980607	41980285:41980397	A3SS,	0.5	n/a
22:50810449|50832564	50827415:50827540	ES,A3SS,	0.5	n/a
3:119582266|119595355	119585437:119585475	ES,	0.5	n/a
3:145820542|145842016	145822066:145822125	A5SS,	0.5	n/a
3:145820542|145842016	145822070:145822125	A5SS,	0.5	n/a
3:149563798|149639014	149619859:149619949	ES,	0.5	n/a
3:15981017|15988362	15984133:15984329	A5SS,	0.5	n/a
3:15981017|15988362	15984133:15984411	A5SS,	0.5	n/a
3:195101738|195133645	195131436:195131738	ES,	0.5	n/a
3:93714718|93722752	93715392:93715528	ES,A3SS,	0.5	n/a
4:141456887|141464740	141464607:141464740	A3SS,	0.5	n/a
4:141456887|141464740	141464624:141464740	A3SS,	0.5	n/a
4:26622235|26641809	26640005:26640084	ES,	0.5	n/a
4:41145004|41179707	41179576:41179707	A5SS,	0.5	n/a
4:41145004|41179707	41179647:41179707	A5SS,	0.5	n/a
5:134509732|134589702	134551106:134551306	ES,	0.5	n/a
5:138614016|138614818	138614254:138614429	ES,	0.5	n/a
5:167915607|167924353	167915607:167915741	A5SS,	0.5	n/a
5:167915607|167924353	167919664:167919852	ES,A3SS,	0.5	n/a
5:167915607|167924353	167919730:167919852	ES,A3SS,	0.5	n/a
5:167915607|167924353	167915607:167915716	A5SS,	0.5	n/a
5:24060288|24062089	24060288:24060408	A5SS,	0.5	n/a
5:24060288|24062089	24061968:24062089	A3SS,	0.5	n/a
5:24060288|24062089	24061959:24062089	A3SS,	0.5	n/a
5:24060288|24062089	24060288:24060398	A5SS,	0.5	n/a
5:40764616|40777688	40777612:40777688	A5SS,	0.5	n/a
5:40764616|40777688	40777547:40777688	A5SS,	0.5	n/a
5:81460218|81474406	81461297:81461409	A5SS,	0.5	n/a
6:109796602|109798133	109797378:109797481	A3SS,	0.5	n/a
7:130630479|130737314	130652148:130652276	ES,	0.5	n/a
7:66520822|66548526	66524805:66524902	ES,	0.5	n/a
7:74125363|74133260	74129177:74129236	ES,	0.5	n/a
8:103862227|103870378	103862227:103862393	A3SS,	0.5	n/a
8:103862227|103870378	103862227:103862372	A3SS,	0.5	n/a
8:128152989|128161917	128161042:128161163	ES,	0.5	n/a
8:19442677|19459376	19457281:19457330	ES,	0.5	n/a
9:111812563|111812972	111812563:111812708	A3SS,	0.5	n/a
9:111812563|111812972	111812563:111812673	A3SS,	0.5	n/a
9:127446880|127495628	127480062:127480150	ES,	0.5	n/a
9:136790965|136804341	136792918:136793014	ES,	0.5	n/a
9:33953283|33963789	33956077:33956144	ES,	0.5	n/a
9:33996221|34017187	34011625:34011662	ES,	0.5	n/a
X:130498723|130503026	130502342:130502423	ES,	0.5	n/a
2:225400245|225422573	225421012:225421137	ES,A3SS,	0.493	n/a
1:155695173|155695810	155695173:155695810	IR,	0.49	n/a
2:240929491|240946787	240939600:240939804	ES,	0.483	n/a
2:61709515|61717911	61715723:61715906	ES,	0.478	n/a
13:45725822|45781640	45769477:45769650	ES,	0.474	n/a
3:29781211|29804480	29799390:29799493	ES,	0.474	n/a
5:132219032|132220811	132219811:132219880	ES,	0.474	n/a
9:115166275|115181238	115179121:115179224	ES,	0.467	n/a
X:67731691|67742759	67738612:67738654	ES,	0.467	n/a
12:109046048|109048186	109046814:109046957	ES,	0.464	n/a
12:70193989|70195501	70193989:70194112	A5SS,	0.463	n/a
14:93685558|93686757	93686632:93686757	A3SS,	0.462	n/a
3:65606749|65607763	65606749:65606817	A3SS,	0.462	n/a
5:136794690|136795421	136795354:136795421	A5SS,	0.462	n/a
1:230313964|230339036	230338491:230338609	ES,	0.455	n/a
10:69902697|69905283	69904553:69904627	ES,	0.455	n/a
10:99915850|99923154	99917220:99917330	ES,	0.455	n/a
11:66589114|66595835	66595741:66595835	A3SS,	0.455	n/a
13:100909849|100925600	100914983:100915085	ES,	0.455	n/a
13:31789188|31803431	31797578:31797650	ES,	0.455	n/a
14:75506614|75509180	75506614:75506727	A3SS,	0.455	n/a
15:77544709|77578846	77577300:77577397	ES,	0.455	n/a
2:61712903|61717911	61715723:61715906	ES,	0.455	n/a
8:128231055|128236720	128231055:128231164	A3SS,	0.455	n/a
10:126727566|126799662	126776760:126776888	ES,	0.447	n/a
11:78176922|78204241	78189484:78189516	A3SS,	0.444	n/a
16:31733947|31734674	31734579:31734674	A3SS,	0.444	n/a
17:80842021|80869665	80861281:80861354	ES,	0.444	n/a
5:64976321|64981299	64976495:64976621	A5SS,	0.444	n/a
10:96201653|96234540	96207392:96207427	ES,	0.439	n/a
8:38947566|38948865	38948803:38948865	A3SS,	0.435	n/a
8:38947566|38948865	38947566:38947710	A5SS,	0.435	n/a
1:16119332|16123438	16119332:16119451	A3SS,	0.429	n/a
1:236332006|236347206	236343179:236343328	ES,	0.429	n/a
1:32560385|32566163	32561261:32561363	ES,	0.429	n/a
1:41578955|41608784	41578955:41579225	A3SS,	0.429	n/a
1:97839117|97848017	97843282:97843483	A5SS,	0.429	n/a
11:120916383|120924441	120924339:120924441	A3SS,	0.429	n/a
11:120916383|120930794	120924339:120924441	A3SS,	0.429	n/a
12:112303054|112308984	112308075:112308164	ES,	0.429	n/a
12:28378728|28460682	28408514:28408595	ES,	0.429	n/a
12:72051306|72054207	72052410:72052488	ES,	0.429	n/a
15:49528048|49584734	49574184:49574282	ES,	0.429	n/a
15:77656416|77657567	77656416:77656533	A3SS,	0.429	n/a
17:58756814|58767122	58766293:58766407	ES,	0.429	n/a
17:80847544|80861354	80858472:80858607	A3SS,	0.429	n/a
2:170728746|170735084	170734004:170734147	ES,	0.429	n/a
2:175779786|175816930	175805544:175805622	ES,	0.429	n/a
2:240078348|240085619	240085505:240085619	A5SS,	0.429	n/a
21:46548317|46554747	46553474:46553580	ES,	0.429	n/a
4:128590191|128609022	128608896:128609022	A3SS,	0.429	n/a
4:85781565|85853516	85833405:85833436	ES,	0.429	n/a
5:134041017|134044578	134044403:134044578	A3SS,	0.429	n/a
5:77385217|77396849	77386368:77386484	ES,	0.429	n/a
6:20649524|20781496	20758826:20758874	ES,	0.429	n/a
7:8043538|8110761	8110551:8110761	A3SS,	0.429	n/a
9:20881870|20916936	20885146:20885229	A3SS,	0.429	n/a
X:72797243|72804408	72802216:72802247	ES,	0.429	n/a
2:207144264|207162097	207145274:207145317	ES,	0.424	n/a
9:125042722|125054119	125048059:125048225	ES,	0.424	n/a
19:5047487|5082515	5071021:5071070	ES,	0.419	n/a
9:115024715|115060196	115060112:115060196	A5SS,	0.417	n/a
1:225273412|225284941	225275728:225275831	ES,	0.415	n/a
17:59853762|59857762	59855481:59855540	ES,	0.413	n/a
1:176118142|176153828	176132951:176133027	ES,	0.407	n/a
1:155891166|155891709	155891166:155891419	A3SS,	0.406	n/a
10:93902786|93940776	93904702:93904842	A3SS,	0.406	n/a
1:10155519|10165802	10161166:10161282	A5SS,	0.4	n/a
1:225140372|225156576	225155133:225155216	A5SS,	0.4	n/a
10:15838099|15889942	15858834:15858914	ES,	0.4	n/a
10:18898774|18905222	18903377:18903542	A5SS,	0.4	n/a
11:76687333|76709865	76692841:76692966	ES,	0.4	n/a
12:129293333|129299615	129294488:129294598	A3SS,	0.4	n/a
13:108269565|108287727	108287609:108287727	A5SS,	0.4	n/a
14:32241022|32257079	32256990:32257079	A3SS,	0.4	n/a
2:197777606|197787849	197787738:197787849	A5SS,	0.4	n/a
2:197777606|197787849	197786827:197786919	A3SS,	0.4	n/a
2:197777606|197787849	197787822:197787849	A5SS,	0.4	n/a
2:77968647|77972614	77972428:77972614	A5SS,	0.4	n/a
21:46548317|46554747	46554630:46554747	A3SS,	0.4	n/a
3:149563798|149639014	149613260:149613347	A5SS,	0.4	n/a
3:196118684|196120490	196120421:196120490	A5SS,	0.4	n/a
6:74190398|74191967	74191752:74191967	A3SS,	0.4	n/a
7:6085702|6089676	6085917:6085990	ES,	0.4	n/a
X:71681854|71694579	71694469:71694579	A5SS,	0.4	n/a
12:116668238|116675510	116674626:116674695	ES,	0.391	n/a
3:197592294|197602646	197600220:197600432	ES,	0.391	n/a
8:38947566|38948865	38948778:38948865	A3SS,	0.391	n/a
12:116668338|116675510	116674626:116674695	ES,	0.39	n/a
16:21326632|21328447	21327228:21327291	A3SS,	0.389	n/a
15:25650608|25657118	25653767:25653831	ES,A5SS,	0.387	n/a
2:120720192|120725548	120723073:120723221	ES,	0.385	n/a
6:42559889|42562042	42560248:42560352	ES,A3SS,	0.385	n/a
17:59853762|59857762	59853762:59853923	A3SS,	0.382	n/a
12:109210814|109217137	109212208:109212334	A5SS,	0.375	n/a
12:112370390|112381173	112370390:112370535	A3SS,	0.375	n/a
14:73614503|73640415	73614675:73614814	A5SS,	0.375	n/a
15:77544709|77578846	77547215:77547270	ES,	0.375	n/a
17:40650942|40653322	40653215:40653322	A3SS,	0.375	n/a
22:22153301|22162135	22161916:22162135	A5SS,	0.375	n/a
22:22153301|22162135	22160139:22160234	A3SS,	0.375	n/a
22:50810449|50832564	50827463:50827540	ES,A3SS,	0.375	n/a
4:139993020|139994721	139993020:139993193	A3SS,	0.375	n/a
6:42941741|42942776	42941741:42941843	A3SS,	0.375	n/a
12:28378728|28412375	28408935:28409011	ES,	0.371	n/a
9:125832629|125839041	125833691:125833780	ES,	0.368	n/a
2:153431650|153437563	153432783:153432889	ES,	0.367	n/a
2:215657021|215661841	215659454:215659523	ES,	0.364	n/a
22:46085592|46125470	46096162:46096258	ES,	0.364	n/a
7:8062113|8110761	8099726:8099836	A5SS,	0.364	n/a
9:127446880|127495628	127446880:127446961	A3SS,	0.364	n/a
14:62188227|62188541	62188227:62188541	IR,	0.361	n/a
2:114489161|114493435	114490942:114490980	ES,	0.36	n/a
3:52156395|52159197	52157302:52157615	A5SS,	0.357	n/a
17:58756814|58786686	58766293:58766407	ES,	0.355	n/a
12:13093450|13100172	13099969:13100172	A3SS,	0.353	n/a
12:13093450|13100172	13097302:13097415	A5SS,	0.353	n/a
9:74810416|74817658	74812390:74812463	ES,A3SS,	0.353	n/a
11:128993341|129034322	128997107:128997200	ES,	0.349	n/a
12:109212025|109217137	109212208:109212334	A5SS,	0.348	n/a
2:64083440|64085070	64084684:64084852	ES,	0.346	n/a
19:17387304|17387718	17387604:17387718	A3SS,	0.344	n/a
1:51926763|51930998	51929679:51929736	ES,	0.343	n/a
6:150092298|150094305	150093691:150093820	ES,	0.34	n/a
1:145682023|145687091	145683575:145683647	ES,	0.333	n/a
1:151611364|151655921	151638409:151638487	ES,	0.333	n/a
1:176118142|176153828	176132005:176132124	ES,	0.333	n/a
1:197552282|197586889	197581061:197581106	ES,	0.333	n/a
1:197641167|197643299	197642801:197642977	ES,	0.333	n/a
1:212502477|212515622	212502477:212502612	A5SS,	0.333	n/a
1:23356936|23377013	23370920:23370979	ES,	0.333	n/a
1:235505023|235506198	235505326:235505661	A5SS,	0.333	n/a
1:235582788|235597595	235594020:235594119	ES,	0.333	n/a
1:243708812|243736350	243727587:243727689	ES,	0.333	n/a
1:32495899|32498935	32497125:32497241	ES,	0.333	n/a
1:40654727|40668286	40668230:40668286	A3SS,	0.333	n/a
1:52215817|52227643	52221992:52222030	ES,	0.333	n/a
1:71530756|71535045	71531361:71531435	ES,	0.333	n/a
11:18010144|18029623	18028487:18028541	ES,	0.333	n/a
11:28711070|28763455	28711324:28711562	A5SS,	0.333	n/a
11:85966264|85968638	85966464:85966507	ES,	0.333	n/a
12:109210814|109212334	109212212:109212334	A5SS,	0.333	n/a
12:112303054|112308984	112305376:112305473	ES,	0.333	n/a
12:117365828|117387511	117372261:117372351	ES,	0.333	n/a
12:124130002|124137282	124135541:124135703	A5SS,	0.333	n/a
12:124130002|124137282	124137071:124137108	A3SS,	0.333	n/a
12:124922476|124941708	124931942:124932030	ES,	0.333	n/a
12:19615444|19636987	19615444:19615637	A5SS,	0.333	n/a
12:27521195|27533337	27523062:27523163	ES,	0.333	n/a
12:28378728|28460682	28379073:28379132	ES,	0.333	n/a
12:29812813|29814312	29814247:29814312	A5SS,	0.333	n/a
12:31648744|31652605	31650295:31650534	ES,	0.333	n/a
13:99566582|99582511	99578091:99578173	ES,	0.333	n/a
14:61503777|61518853	61509865:61509930	ES,	0.333	n/a
14:81329101|81366373	81362062:81362129	A3SS,	0.333	n/a
15:43690239|43694048	43691310:43691372	ES,	0.333	n/a
16:56969147|56970729	56970599:56970729	A3SS,	0.333	n/a
16:68300496|68309152	68307721:68307807	ES,	0.333	n/a
17:18210205|18212255	18210787:18210884	ES,	0.333	n/a
17:42807273|42811531	42809546:42809633	ES,	0.333	n/a
17:57158458|57165768	57158458:57158549	A3SS,	0.333	n/a
17:58756814|58885437	58766293:58766348	ES,	0.333	n/a
17:80842021|80869665	80858527:80858607	ES,	0.333	n/a
19:9767223|9770143	9768685:9768811	A3SS,	0.333	n/a
2:169404106|169417832	169414602:169414671	ES,	0.333	n/a
2:170885856|170917953	170897406:170897495	A3SS,	0.333	n/a
2:176844538|176859008	176858862:176859008	A5SS,	0.333	n/a
2:225421012|225422573	225421012:225421161	A3SS,	0.333	n/a
2:42539274|42561009	42544567:42544623	ES,	0.333	n/a
2:70451686|70457986	70457893:70457986	A5SS,	0.333	n/a
20:43703659|43706602	43703659:43704015	A5SS,	0.333	n/a
3:105389077|105400662	105400323:105400454	ES,	0.333	n/a
3:119222379|119236162	119232488:119232566	ES,	0.333	n/a
3:172499953|172504364	172504294:172504364	A3SS,	0.333	n/a
4:148860976|148944564	148860976:148861038	A5SS,	0.333	n/a
4:83799883|83802075	83801815:83801864	ES,	0.333	n/a
5:109049221|109051965	109051861:109051965	A3SS,	0.333	n/a
5:111594926|111616020	111615969:111616020	A5SS,	0.333	n/a
5:131034610|131044965	131044899:131044965	A5SS,	0.333	n/a
5:87516380|87541609	87517491:87517577	ES,	0.333	n/a
6:143158072|143247159	143222801:143222874	ES,	0.333	n/a
7:156516806|156549159	156520624:156520701	ES,	0.333	n/a
7:66248662|66264401	66260498:66260579	ES,	0.333	n/a
8:128231055|128239786	128236645:128236720	ES,	0.333	n/a
8:131226802|131249240	131249174:131249240	A5SS,	0.333	n/a
8:131226802|131249240	131226802:131226914	A3SS,	0.333	n/a
8:42716888|42729149	42719760:42719836	ES,A5SS,	0.333	n/a
9:114332371|114348445	114341072:114341231	A5SS,	0.333	n/a
9:114332371|114348445	114337014:114337118	A3SS,	0.333	n/a
9:114820708|114825313	114820708:114820966	A3SS,	0.333	n/a
9:20874680|20885229	20885108:20885229	A3SS,	0.333	n/a
9:2690951|2782846	2777873:2777994	ES,	0.333	n/a
9:36594625|36607670	36607576:36607670	A3SS,	0.333	n/a
X:112278354|112293180	112291554:112291623	ES,	0.333	n/a
12:120995085|120995485	120995085:120995485	IR,	0.327	n/a
12:19615444|19626289	19619682:19619784	ES,	0.327	n/a
13:33091994|33101669	33101595:33101669	A5SS,	0.324	n/a
14:70442432|70461197	70442432:70442521	A5SS,	0.32	n/a
11:85685751|85695016	85692915:85693046	A3SS,	0.318	n/a
21:38792601|38802702	38794884:38794954	ES,	0.315	n/a
7:158528194|158531812	158529739:158529808	A3SS,	0.312	n/a
9:102814699|102822454	102816319:102816489	ES,A3SS,	0.312	n/a
1:247319708|247323115	247319708:247320705	A3SS,	0.308	n/a
1:41578955|41582682	41578955:41579225	A3SS,	0.308	n/a
14:64568650|64574325	64568650:64568754	A5SS,	0.308	n/a
18:76953183|76974038	76964748:76964874	ES,	0.308	n/a
14:76642966|76662315	76644551:76644665	ES,	0.307	n/a
13:61013822|61041513	61018821:61018882	A3SS,	0.306	n/a
9:77631184|77632364	77631469:77631721	ES,	0.306	n/a
10:96201653|96253204	96207392:96207427	ES,	0.304	n/a
13:31789188|31803431	31799005:31799056	ES,	0.3	n/a
22:47022648|47033857	47022648:47022813	A5SS,	0.3	n/a
5:79974746|80057497	80015303:80015354	ES,	0.3	n/a
6:145992375|146007432	146001219:146001266	ES,	0.3	n/a
9:33953283|33973235	33971649:33971735	A3SS,	0.3	n/a
1:58971732|59002413	58988499:58988584	ES,	0.294	n/a
1:6867043|6885270	6879380:6879530	ES,	0.294	n/a
10:104018686|104103939	104044710:104044827	ES,	0.294	n/a
10:116719485|116734144	116731910:116732033	A3SS,	0.294	n/a
22:38208894|38209616	38208894:38209616	IR,	0.294	n/a
7:102665510|102669865	102669047:102669195	ES,	0.294	n/a
14:71880665|71996087	71970329:71970385	ES,	0.292	n/a
1:247320302|247323115	247320302:247320423	A3SS,	0.29	n/a
1:10327438|10328321	10327438:10327621	A5SS,	0.286	n/a
12:50488220|50490755	50490598:50490755	A3SS,	0.286	n/a
16:16101673|16102021	16101968:16102021	A3SS,	0.286	n/a
17:18210205|18212255	18211627:18211738	A5SS,	0.286	n/a
18:11752852|11753944	11753474:11753531	ES,	0.286	n/a
18:19102619|19112821	19102619:19102991	A5SS,	0.286	n/a
2:183817133|183818059	183817841:183818059	A5SS,	0.286	n/a
2:204267299|204291992	204281637:204281804	A3SS,	0.286	n/a
3:27453133|27465643	27463113:27463270	ES,	0.286	n/a
4:13338517|13383218	13338517:13338576	A3SS,	0.286	n/a
5:37243115|37247847	37244477:37244709	ES,	0.286	n/a
5:81460218|81474406	81461297:81461359	A5SS,	0.286	n/a
9:88284400|88296250	88292351:88292438	A3SS,	0.286	n/a
17:81006347|81006661	81006347:81006661	IR,	0.281	n/a
13:37614542|37625720	37621483:37621545	ES,	0.28	n/a
1:231081135|231097049	231092167:231092228	ES,A3SS,	0.278	n/a
4:85818064|85853516	85833405:85833472	ES,	0.278	n/a
6:30618771|30619243	30618771:30618859	A5SS,	0.278	n/a
7:138951079|138957186	138954182:138954269	A3SS,	0.278	n/a
1:176132005|176153828	176132951:176133027	A5SS,	0.273	n/a
1:52956404|52975384	52957868:52957947	ES,	0.273	n/a
10:1130343|1151207	1149539:1149776	ES,	0.273	n/a
11:85692172|85695016	85692915:85693031	A3SS,	0.273	n/a
15:61307997|61327125	61317683:61317746	ES,	0.273	n/a
19:3660964|3661999	3661371:3661524	ES,	0.273	n/a
2:176844538|176860374	176858862:176859008	ES,	0.273	n/a
3:51575514|51624575	51606838:51606931	ES,	0.273	n/a
4:115380370|115412085	115406748:115406883	ES,A3SS,	0.273	n/a
4:30921775|30924205	30921775:30921967	A5SS,	0.273	n/a
5:74109665|74137504	74130251:74130422	ES,	0.273	n/a
X:24190832|24197887	24193506:24193560	ES,	0.273	n/a
14:104433046|104436958	104436467:104436549	ES,	0.267	n/a
2:225400245|225422573	225421012:225421106	ES,A3SS,	0.267	n/a
1:180366651|180382606	180370657:180370754	ES,	0.266	n/a
20:30954187|30989835	30959581:30959677	ES,	0.265	n/a
12:49880033|49884514	49884061:49884097	ES,	0.259	n/a
7:24663282|24681487	24665299:24665355	ES,	0.259	n/a
1:213037067|213046160	213037735:213037861	ES,	0.257	n/a
1:23356962|23377013	23370920:23370979	ES,	0.256	n/a
X:24190832|24197887	24191724:24191840	ES,	0.255	n/a
2:207144264|207162097	207156738:207156840	ES,	0.252	n/a
1:155638418|155640255	155638418:155638508	A3SS,	0.25	n/a
1:235643370|235658138	235652473:235652573	ES,A3SS,	0.25	n/a
1:235643370|235658138	235652473:235652657	ES,A3SS,	0.25	n/a
1:38047824|38049534	38049295:38049369	A3SS,	0.25	n/a
1:41536267|41541123	41537503:41537645	ES,	0.25	n/a
1:58971732|59002413	58996273:58996397	ES,	0.25	n/a
10:15838099|15889942	15863655:15863725	ES,	0.25	n/a
10:74468041|74496329	74475520:74475660	A3SS,	0.25	n/a
10:74764700|74776657	74767999:74768050	A5SS,	0.25	n/a
10:74764700|74776657	74764700:74764753	A3SS,	0.25	n/a
11:128963516|129034322	128997107:128997200	ES,	0.25	n/a
11:18010144|18029623	18010144:18010302	A3SS,	0.25	n/a
11:85692788|85695016	85692915:85693046	A3SS,	0.25	n/a
11:9308002|9321248	9309989:9310082	A3SS,	0.25	n/a
12:111920591|111924628	111923075:111923135	A5SS,	0.25	n/a
13:51501543|51523641	51503649:51503718	A3SS,	0.25	n/a
15:80412670|80415142	80414376:80414445	ES,	0.25	n/a
16:28498777|28500707	28500582:28500707	A5SS,	0.25	n/a
17:4186093|4200104	4186093:4186216	A3SS,	0.25	n/a
17:46189393|46190763	46189847:46190022	A3SS,	0.25	n/a
17:53478830|53481229	53479527:53479664	A5SS,	0.25	n/a
18:76914504|76974038	76936813:76936907	ES,	0.25	n/a
2:168869144|168921891	168891982:168892044	ES,	0.25	n/a
20:34304662|34313077	34309662:34309799	A5SS,	0.25	n/a
20:39896103|39897723	39897630:39897723	A5SS,	0.25	n/a
22:29517345|29521404	29517345:29517512	A5SS,	0.25	n/a
22:46493806|46505788	46499072:46499133	A5SS,	0.25	n/a
3:124576079|124578293	124576079:124576155	A3SS,	0.25	n/a
3:196817783|196846401	196842798:196842895	A3SS,	0.25	n/a
3:3178944|3186394	3182194:3182332	ES,	0.25	n/a
3:93714718|93722752	93715407:93715528	ES,A3SS,	0.25	n/a
4:106613133|106614643	106613133:106613292	A3SS,	0.25	n/a
4:186168448|186188309	186176861:186176896	A3SS,	0.25	n/a
4:85815978|85853516	85815978:85816097	A3SS,	0.25	n/a
5:158871658|158877741	158872097:158872210	A5SS,	0.25	n/a
6:109796602|109798133	109797378:109797456	A3SS,	0.25	n/a
6:109796602|109798133	109797378:109797461	A3SS,	0.25	n/a
7:105192017|105195674	105192017:105192158	A5SS,	0.25	n/a
7:105192017|105195674	105195479:105195674	A3SS,	0.25	n/a
7:74103458|74105443	74103458:74103594	A5SS,	0.25	n/a
8:141889570|141900868	141900642:141900696	A3SS,	0.25	n/a
8:25126361|25136181	25132071:25132186	ES,	0.25	n/a
9:100839200|100840629	100840576:100840629	A3SS,	0.25	n/a
9:125751576|125752492	125752355:125752492	A3SS,	0.25	n/a
9:125751576|125752492	125751576:125751723	A5SS,	0.25	n/a
9:74823141|74834422	74823141:74823254	A5SS,	0.25	n/a
14:71970329|71996087	71995416:71995457	ES,	0.245	n/a
21:38792601|38845182	38802571:38802702	ES,A5SS,	0.242	n/a
21:40600426|40601362	40601040:40601145	ES,	0.241	n/a
14:67431908|67525503	67452399:67452455	ES,	0.238	n/a
14:67431908|67525503	67452625:67452717	ES,	0.238	n/a
9:79852918|79853302	79852918:79853302	IR,	0.236	n/a
20:25614685|25626284	25620365:25620618	ES,A3SS,	0.235	n/a
7:77407655|77408131	77407847:77408131	A3SS,	0.235	n/a
12:116674626|116675510	116674962:116675078	ES,	0.234	n/a
5:179688684|179707608	179706796:179707036	ES,	0.232	n/a
1:247320386|247323115	247320386:247320509	A3SS,	0.231	n/a
11:86778736|86802437	86786679:86786828	ES,	0.231	n/a
17:29483001|29491097	29489880:29489955	ES,	0.231	n/a
2:207144264|207162097	207145350:207145426	ES,	0.231	n/a
7:23433961|23509700	23455748:23455838	ES,	0.231	n/a
15:25650608|25657118	25652214:25652284	ES,A3SS,	0.226	n/a
15:25650608|25660989	25652214:25652284	ES,A5SS,	0.226	n/a
9:102677460|102691125	102684484:102684577	ES,	0.226	n/a
14:56114743|56115588	56114743:56114903	A5SS,	0.222	n/a
15:65772560|65773953	65773849:65773953	A5SS,	0.222	n/a
5:64976321|64981299	64976321:64976379	A3SS,	0.222	n/a
8:128231055|128236720	128235783:128235889	A3SS,	0.222	n/a
1:77672325|77678032	77677722:77677777	ES,	0.22	n/a
11:11895347|11901927	11895347:11895462	A5SS,	0.219	n/a
12:39223181|39242464	39241715:39241777	ES,	0.217	n/a
12:65720606|65762806	65753285:65753422	ES,A5SS,	0.217	n/a
21:46538479|46554747	46540327:46540423	ES,	0.217	n/a
1:213037067|213058738	213043396:213043510	ES,	0.214	n/a
11:20424465|20448411	20426424:20426529	ES,	0.214	n/a
12:110729825|110734542	110733509:110733777	ES,	0.214	n/a
15:25650608|25660989	25660862:25660989	A5SS,	0.214	n/a
5:81460218|81474406	81461297:81461380	A5SS,	0.214	n/a
7:156516806|156619438	156520624:156520701	ES,	0.214	n/a
9:102677460|102691125	102678331:102678450	ES,	0.213	n/a
1:231090079|231097049	231092167:231092306	ES,A3SS,	0.211	n/a
3:3178944|3182332	3178944:3179157	A5SS,	0.211	n/a
1:180366651|180382606	180370846:180370915	ES,	0.2	n/a
1:212179981|212208745	212194425:212194554	ES,	0.2	n/a
1:213037067|213046160	213043396:213043510	ES,	0.2	n/a
1:236969444|236979843	236974945:236975001	ES,	0.2	n/a
1:8674620|8684439	8676552:8676638	ES,	0.2	n/a
10:93902786|93911113	93904702:93904842	A3SS,	0.2	n/a
11:28694338|28763455	28704715:28704782	ES,	0.2	n/a
12:112086984|112087575	112087432:112087575	A3SS,	0.2	n/a
12:123825535|123834988	123829767:123830114	A5SS,	0.2	n/a
12:28408514|28460682	28459675:28459878	A3SS,	0.2	n/a
12:72051306|72054207	72051306:72051375	A3SS,	0.2	n/a
13:114164553|114193822	114188451:114188555	ES,	0.2	n/a
14:76633006|76647192	76644551:76644665	ES,	0.2	n/a
15:77544709|77576372	77547215:77547270	ES,	0.2	n/a
16:7926082|7944397	7929541:7929796	A3SS,	0.2	n/a
17:26685939|26687870	26687174:26687261	ES,	0.2	n/a
17:27809215|27818883	27818828:27818883	A3SS,	0.2	n/a
17:34144720|34149837	34147168:34147252	ES,	0.2	n/a
17:42512433|42541912	42516039:42516083	ES,	0.2	n/a
17:59821793|59857762	59856038:59856139	ES,	0.2	n/a
17:80851423|80861354	80858472:80858607	A3SS,	0.2	n/a
18:12951854|12963370	12955462:12955608	ES,	0.2	n/a
19:11015627|11019883	11019226:11019344	ES,	0.2	n/a
2:172782047|172823470	172809399:172809519	ES,	0.2	n/a
2:184016236|184047408	184043535:184043635	ES,	0.2	n/a
2:197777606|197787849	197787801:197787849	A5SS,	0.2	n/a
2:61340905|61345251	61340905:61340974	A5SS,	0.2	n/a
2:61340905|61345251	61343137:61343205	A3SS,	0.2	n/a
3:196921296|197009716	196997571:196997655	ES,	0.2	n/a
3:43591212|43607219	43592944:43593058	ES,	0.2	n/a
3:52156395|52172318	52157549:52157615	ES,	0.2	n/a
4:83799883|83803093	83799883:83799962	A3SS,	0.2	n/a
4:85800559|85853516	85833405:85833472	ES,	0.2	n/a
5:137733867|137735701	137733867:137734109	A5SS,	0.2	n/a
5:619105|624694	619105:619185	A5SS,	0.2	n/a
5:619105|624694	620251:620376	A3SS,	0.2	n/a
6:149700547|149720320	149719105:149719198	ES,	0.2	n/a
6:3737313|3739395	3737851:3737964	ES,	0.2	n/a
6:99992988|99999771	99998094:99998185	A3SS,	0.2	n/a
6:99992988|99999771	99998869:99998904	ES,	0.2	n/a
7:1201988|1202364	1201988:1202364	IR,	0.2	n/a
8:142170731|142173528	142173467:142173528	A3SS,	0.2	n/a
9:128305338|128322088	128312425:128312588	ES,	0.2	n/a
9:36594625|36607670	36604012:36604113	ES,	0.2	n/a
12:116534474|116549317	116547579:116547674	ES,	0.194	n/a
15:25650608|25657118	25652214:25652409	ES,A3SS,	0.194	n/a
14:39620950|39628754	39628654:39628754	A5SS,	0.19	n/a
10:530721|532470	532395:532470	A5SS,	0.185	n/a
1:155747413|155753880	155747413:155747632	A3SS,	0.182	n/a
12:100598718|100601564	100599454:100599535	A5SS,	0.182	n/a
16:87760371|87764250	87762916:87763123	A3SS,	0.182	n/a
2:207144264|207146633	207145350:207145426	ES,	0.182	n/a
3:169854207|169867032	169854207:169854447	A3SS,	0.182	n/a
10:96201653|96234540	96203085:96203180	ES,	0.18	n/a
11:28700652|28763455	28704715:28704782	ES,	0.176	n/a
14:71880665|71933964	71933836:71933964	A3SS,	0.176	n/a
2:18825436|18869594	18826494:18826571	ES,	0.176	n/a
20:25614685|25626284	25620389:25620618	ES,A3SS,	0.176	n/a
6:145992375|146007432	146003247:146003359	ES,	0.176	n/a
20:57014001|57016139	57014305:57014364	ES,	0.174	n/a
8:38947566|38948865	38948762:38948865	A3SS,	0.174	n/a
5:138979957|138994551	138994171:138994359	IR,	0.172	n/a
7:104678573|104681470	104679600:104679716	ES,	0.172	n/a
20:10536879|10541468	10538007:10538074	ES,	0.171	n/a
5:170305101|170308900	170307161:170307235	ES,	0.17	n/a
1:235582788|235590554	235590462:235590554	A3SS,	0.167	n/a
1:59805630|59812070	59810670:59810718	ES,	0.167	n/a
11:77435393|77436744	77436580:77436744	A5SS,	0.167	n/a
15:89790860|89804074	89790860:89790957	A5SS,	0.167	n/a
2:191068504|191077801	191069842:191069958	A5SS,	0.167	n/a
2:204267299|204291992	204276008:204276094	ES,	0.167	n/a
2:61339657|61345251	61340905:61340989	ES,	0.167	n/a
20:30954187|30978970	30959581:30959677	ES,	0.167	n/a
22:48081949|48082955	48082324:48082444	A3SS,	0.167	n/a
5:41794105|41807540	41805724:41805783	A5SS,	0.167	n/a
7:157013383|157024021	157013383:157013500	A5SS,	0.167	n/a
8:42716888|42729149	42719756:42719836	ES,A5SS,	0.167	n/a
9:127446880|127447265	127446880:127447014	A3SS,	0.167	n/a
9:74823141|74828907	74823141:74823254	A5SS,	0.167	n/a
X:14814282|14815420	14814892:14815420	IR,	0.167	n/a
X:24190832|24197887	24197369:24197887	A3SS,	0.167	n/a
10:96201653|96234540	96211315:96211366	ES,	0.165	n/a
2:64083440|64085070	64084098:64084136	ES,	0.162	n/a
12:29812813|29814312	29812813:29812855	A3SS,	0.16	n/a
4:88005272|88012981	88010733:88010842	ES,A3SS,	0.159	n/a
20:33065577|33067594	33065577:33065711	A5SS,	0.158	n/a
4:85818064|85833472	85822401:85822532	ES,	0.158	n/a
14:71880665|71996087	71995416:71995457	ES,	0.157	n/a
14:73614503|73614814	73614651:73614814	A3SS,	0.154	n/a
7:156758964|156759786	156758964:156759118	A5SS,	0.15	n/a
9:74825603|74834422	74828816:74828907	A3SS,	0.15	n/a
12:72163580|72167802	72165885:72166008	ES,	0.148	n/a
7:6472468|6476164	6474425:6474651	A5SS,	0.148	n/a
2:228356263|228389631	228388535:228388641	A3SS,	0.146	n/a
3:142455221|142467302	142462327:142462428	ES,	0.146	n/a
1:246078832|246093239	246092814:246092854	ES,	0.143	n/a
1:62713144|62717142	62713144:62713335	A3SS,	0.143	n/a
10:1130343|1142186	1141608:1141769	ES,	0.143	n/a
10:93902786|93952393	93952234:93952393	A5SS,	0.143	n/a
10:96201653|96204296	96204238:96204296	A3SS,	0.143	n/a
11:77330651|77340944	77333545:77333718	ES,	0.143	n/a
12:123030723|123036243	123035866:123035909	ES,	0.143	n/a
12:19646734|19653155	19649621:19649696	ES,	0.143	n/a
14:102659800|102664184	102662211:102662241	ES,	0.143	n/a
14:59730159|59758024	59730484:59730563	ES,	0.143	n/a
15:50733546|50741682	50736768:50736841	ES,	0.143	n/a
15:56311594|56454438	56451871:56452035	ES,A3SS,	0.143	n/a
15:56311594|56454438	56451966:56452035	ES,A3SS,	0.143	n/a
15:83295944|83310433	83297413:83297503	ES,	0.143	n/a
17:26685939|26687594	26687174:26687261	ES,	0.143	n/a
17:3717616|3719564	3718860:3718921	ES,	0.143	n/a
19:23556544|23557566	23556544:23556618	A3SS,	0.143	n/a
19:37690302|37698156	37696857:37696954	ES,	0.143	n/a
19:58755331|58758160	58757153:58757235	ES,	0.143	n/a
2:70451686|70463307	70463205:70463307	A5SS,	0.143	n/a
20:18491466|18492926	18491791:18491844	ES,	0.143	n/a
20:37612342|37623523	37617456:37617560	A3SS,	0.143	n/a
21:38792601|38845182	38801169:38801210	ES,	0.143	n/a
3:11849307|11851156	11849809:11850057	ES,	0.143	n/a
3:156638364|156660503	156645218:156645393	ES,	0.143	n/a
3:57569625|57570191	57569625:57569759	A3SS,	0.143	n/a
4:184774033|184774996	184774823:184774996	A3SS,	0.143	n/a
4:85800559|85853516	85822401:85822532	ES,	0.143	n/a
5:74715166|74722303	74721186:74721324	A5SS,	0.143	n/a
7:24663282|24681487	24681346:24681487	A3SS,	0.143	n/a
7:64004085|64004810	64004455:64004810	A5SS,	0.143	n/a
9:136726496|136804341	136792918:136793014	ES,	0.143	n/a
2:159922408|159954346	159932987:159933040	ES,	0.14	n/a
1:21377359|21415706	21415643:21415706	A5SS,	0.138	n/a
11:86778736|86802437	86782573:86782657	ES,A3SS,	0.138	n/a
11:86778736|86802437	86778736:86778848	A5SS,	0.138	n/a
17:29483001|29497015	29491067:29491097	ES,	0.136	n/a
9:137582758|137593179	137583646:137583674	ES,	0.136	n/a
3:119219542|119222868	119222806:119222868	A3SS,	0.133	n/a
3:196098767|196129890	196120421:196120490	A5SS,	0.133	n/a
3:47079156|47088111	47079156:47079263	A3SS,	0.133	n/a
7:8043538|8110761	8095063:8095179	A3SS,	0.133	n/a
12:51173923|51203372	51189681:51189792	A3SS,	0.13	n/a
14:104245082|104263855	104260914:104261000	ES,	0.13	n/a
15:51743842|51747425	51744017:51744196	ES,	0.13	n/a
3:138407717|138413749	138409842:138409904	A3SS,	0.13	n/a
15:25650608|25657118	25653719:25653831	ES,A5SS,	0.129	n/a
15:25650608|25660989	25652201:25652284	ES,A5SS,	0.129	n/a
1:11181303|11182183	11181303:11181441	A3SS,	0.125	n/a
1:231081135|231097049	231090079:231090124	A3SS,	0.125	n/a
10:126727566|126799662	126763312:126763412	ES,	0.125	n/a
10:75156277|75160615	75158110:75158143	A5SS,	0.125	n/a
12:11126254|11199787	11181000:11181114	ES,	0.125	n/a
14:62193424|62194373	62194313:62194373	A3SS,	0.125	n/a
17:1746097|1756483	1747214:1747321	A5SS,	0.125	n/a
17:42231924|42232779	42232221:42232306	A3SS,	0.125	n/a
17:46189393|46190763	46189393:46189473	A5SS,	0.125	n/a
2:240078348|240085619	240081478:240081605	ES,	0.125	n/a
2:242028603|242033847	242029677:242029814	ES,A5SS,	0.125	n/a
20:10536879|10541468	10541352:10541468	A3SS,	0.125	n/a
3:52946554|52947633	52946554:52946638	A3SS,	0.125	n/a
3:52988333|53003274	52996225:52996271	ES,	0.125	n/a
5:76745585|76785397	76781238:76781366	ES,	0.125	n/a
12:28408514|28412375	28408514:28409011	IR,	0.123	n/a
12:70671912|70704797	70687851:70688074	A3SS,	0.122	n/a
16:88008654|88017865	88008654:88008809	A5SS,	0.122	n/a
3:149613260|149639014	149619499:149619641	ES,	0.122	n/a
12:111991962|111993723	111992670:111992873	A3SS,	0.121	n/a
2:240929491|240946787	240945165:240945258	ES,A3SS,	0.121	n/a
1:197621365|197684204	197642905:197642977	ES,	0.12	n/a
1:78324623|78332076	78324999:78325071	ES,	0.12	n/a
10:93902786|93952393	93947387:93947433	ES,	0.12	n/a
7:74119496|74131270	74129443:74129486	ES,	0.12	n/a
14:71880665|71996087	71948872:71948928	ES,	0.117	n/a
5:38523521|38530768	38527338:38527396	A5SS,	0.115	n/a
5:38523521|38530768	38523521:38523672	A3SS,	0.115	n/a
13:61013822|61034674	61018821:61018882	A3SS,	0.114	n/a
15:90414707|90432372	90421497:90421532	ES,	0.114	n/a
1:197611841|197643299	197616185:197616244	ES,	0.111	n/a
1:21415631|21437876	21424708:21424870	ES,A3SS,	0.111	n/a
1:231081135|231097049	231092167:231092306	ES,A3SS,	0.111	n/a
11:19854030|19890543	19864137:19864249	ES,	0.111	n/a
11:75590923|75623083	75590923:75591076	A5SS,	0.111	n/a
12:31648744|31652605	31649419:31649469	ES,	0.111	n/a
13:114164553|114175048	114173850:114174116	ES,A5SS,	0.111	n/a
13:114164553|114175048	114173850:114173970	ES,A5SS,	0.111	n/a
13:37614542|37625720	37619384:37619502	A3SS,	0.111	n/a
15:36936479|36950106	36945824:36945896	ES,	0.111	n/a
15:63845914|63855207	63849040:63849121	ES,	0.111	n/a
17:50679133|50850712	50850119:50850170	ES,	0.111	n/a
2:24787164|24807429	24795035:24795101	ES,	0.111	n/a
20:57094560|57098862	57096446:57096607	ES,	0.111	n/a
22:41926691|41936799	41928098:41928152	A3SS,	0.111	n/a
3:141087463|141105779	141102502:141102551	ES,	0.111	n/a
3:149563798|149619949	149613260:149613347	A5SS,	0.111	n/a
3:196876614|196921460	196888511:196888609	ES,	0.111	n/a
3:47079156|47088111	47082850:47082973	ES,	0.111	n/a
3:48215774|48219478	48215774:48215906	A3SS,	0.111	n/a
4:184104556|184114861	184104556:184104797	A5SS,	0.111	n/a
5:108281831|108295048	108290430:108290568	A5SS,	0.111	n/a
5:92889467|92899169	92890833:92890929	ES,A3SS,	0.111	n/a
7:27668990|27676356	27671955:27672060	A3SS,	0.111	n/a
8:18656805|18662408	18662283:18662408	A5SS,	0.111	n/a
2:225400245|225422573	225421012:225421161	ES,A3SS,	0.107	n/a
22:46125305|46136418	46132848:46132963	ES,	0.107	n/a
11:34093273|34098189	34097783:34097927	A5SS,	0.105	n/a
2:72945232|72948293	72947189:72947257	ES,	0.105	n/a
20:33065577|33067594	33067500:33067594	A3SS,	0.105	n/a
5:95099212|95119667	95115956:95116024	A5SS,	0.105	n/a
1:231090079|231097049	231090079:231090124	A3SS,	0.103	n/a
15:50330965|50339661	50336420:50336567	ES,	0.103	n/a
22:25771780|25777545	25771780:25771867	A3SS,	0.103	n/a
3:194325016|194331749	194325016:194325170	A3SS,	0.103	n/a
X:71681854|71684581	71683326:71683396	ES,	0.103	n/a
5:619105|620376	620251:620376	A3SS,	0.101	n/a
1:108724563|108728576	108727838:108727892	ES,A5SS,	0.1	n/a
10:104018686|104103939	104092165:104092283	ES,	0.1	n/a
12:27872741|27877119	27875109:27875168	ES,	0.1	n/a
14:31841016|31844174	31844034:31844174	A5SS,	0.1	n/a
16:28112779|28113266	28112779:28112925	A3SS,	0.1	n/a
2:143642918|143676298	143664820:143664965	ES,	0.1	n/a
2:61749746|61761038	61752405:61752468	ES,	0.1	n/a
21:16386665|16415891	16415038:16415136	ES,	0.1	n/a
22:50810449|50832564	50832179:50832228	ES,	0.1	n/a
3:149613260|149639014	149613260:149613347	A5SS,	0.1	n/a
3:3819409|3830758	3824187:3824332	ES,A3SS,	0.1	n/a
5:118842513|118850741	118845125:118845189	ES,	0.1	n/a
6:106696025|106756366	106743074:106743119	ES,	0.1	n/a
7:156516806|156549159	156518352:156518531	A5SS,	0.1	n/a
7:156758964|156759786	156758964:156759044	A5SS,	0.1	n/a
7:156758964|156759786	156759660:156759786	A3SS,	0.1	n/a
8:25101190|25136181	25132071:25132186	ES,	0.1	n/a
3:31917925|31921322	31918172:31918236	ES,	0.099	n/a
9:74817487|74828907	74823141:74823210	ES,A5SS,	0.098	n/a
12:70901675|70916410	70914566:70914708	ES,	0.095	n/a
2:78225204|78252550	78225606:78225659	ES,A3SS,	0.095	n/a
9:96238538|96261168	96261077:96261168	A3SS,	0.095	n/a
12:19615444|19626289	19615444:19615637	A5SS,	0.093	n/a
7:27668990|27689252	27671955:27672045	A3SS,	0.093	n/a
1:179959642|179961356	179959877:179959927	ES,	0.091	n/a
1:21327692|21329301	21327692:21327817	A3SS,	0.091	n/a
1:230798887|230807386	230807005:230807150	ES,	0.091	n/a
1:231079552|231097049	231092167:231092228	ES,	0.091	n/a
1:51253672|51323669	51320014:51320089	ES,	0.091	n/a
10:96201653|96234540	96230752:96230801	ES,	0.091	n/a
11:103182607|103229087	103228983:103229087	A3SS,	0.091	n/a
12:122973933|122977336	122975482:122975560	ES,A3SS,	0.091	n/a
12:27199091|27219830	27214437:27214500	ES,	0.091	n/a
15:61307997|61386810	61327038:61327125	ES,	0.091	n/a
2:143642918|143676298	143659803:143659901	ES,	0.091	n/a
7:33388680|33427756	33390831:33390935	ES,	0.091	n/a
8:18622959|18662408	18662032:18662056	A3SS,	0.091	n/a
8:18622959|18662408	18662283:18662408	A5SS,	0.091	n/a
9:33960824|33973235	33971649:33971735	A3SS,	0.091	n/a
17:59853762|59857762	59856034:59856139	ES,	0.089	n/a
2:169018297|169023917	169023586:169023674	ES,	0.089	n/a
10:52193236|52350007	52279652:52279681	ES,A5SS,	0.088	n/a
1:247318868|247323115	247320302:247320519	ES,A3SS,	0.085	n/a
12:49053688|49054402	49054251:49054402	A5SS,	0.083	n/a
13:45725822|45781640	45757536:45757613	ES,	0.083	n/a
15:63845914|63855207	63848871:63848947	A3SS,	0.083	n/a
17:44143903|44172067	44159807:44159843	ES,A3SS,	0.083	n/a
17:58342773|58348842	58343337:58343371	A3SS,	0.083	n/a
7:156516806|156619438	156521338:156521414	ES,	0.083	n/a
10:486811|532470	530721:530888	ES,	0.082	n/a
7:152007051|152012423	152007051:152007097	A3SS,	0.082	n/a
7:27668990|27689252	27671955:27672060	A3SS,	0.082	n/a
14:71970329|71996087	71970545:71970663	ES,	0.081	n/a
8:48192450|48206619	48192450:48192568	A5SS,	0.081	n/a
7:158704241|158711560	158706924:158707045	A5SS,	0.08	n/a
1:180366651|180382606	180375402:180375553	ES,	0.079	n/a
10:52193236|52350007	52220433:52220568	A3SS,	0.079	n/a
21:38792601|38845182	38828432:38828610	ES,	0.079	n/a
21:38792601|38845182	38797992:38798083	ES,	0.079	n/a
4:88005272|88012981	88010697:88010842	ES,A3SS,	0.079	n/a
1:212502477|212506940	212502477:212502612	A5SS,	0.077	n/a
1:21327692|21437876	21415631:21415706	ES,	0.077	n/a
1:213277796|213290752	213281511:213281579	ES,	0.077	n/a
1:227192695|227204751	227198579:227198764	ES,	0.077	n/a
1:23370920|23377013	23373042:23373158	ES,	0.077	n/a
13:21436856|21442840	21437108:21437278	ES,	0.077	n/a
15:25650608|25671366	25653767:25653831	ES,	0.077	n/a
20:21321359|21327188	21326472:21326525	ES,	0.077	n/a
3:15452752|15457449	15455528:15455669	ES,	0.077	n/a
3:4403723|4418073	4418024:4418073	A5SS,	0.077	n/a
4:123856869|123900541	123873354:123873425	ES,	0.077	n/a
5:130883740|130897740	130896405:130896475	ES,	0.077	n/a
2:61749746|61753656	61752177:61752238	ES,	0.076	n/a
1:108724563|108728576	108727765:108727892	ES,A5SS,	0.075	n/a
19:30462100|30477324	30471066:30471157	ES,	0.074	n/a
16:88008654|88017865	88008654:88008813	A5SS,	0.073	n/a
2:176835492|176860374	176858862:176859008	ES,A5SS,	0.073	n/a
3:196842798|196846401	196842798:196842895	A3SS,	0.073	n/a
2:240929491|240946787	240942466:240942557	ES,A3SS,	0.072	n/a
1:197621365|197684204	197641167:197641239	A3SS,	0.071	n/a
18:29218607|29246335	29237939:29238027	A3SS,	0.071	n/a
2:242028603|242033847	242031310:242031407	ES,	0.071	n/a
7:17908030|17937069	17937001:17937069	A5SS,	0.071	n/a
7:24663282|24681487	24663681:24663775	ES,	0.071	n/a
8:56854414|56860282	56854414:56854487	A5SS,	0.071	n/a
2:169018297|169038600	169021781:169021806	ES,	0.068	n/a
11:128993341|129034322	128994183:128994355	ES,	0.067	n/a
12:109212025|109212334	109212212:109212334	A5SS,	0.067	n/a
12:112371690|112381173	112371690:112371813	A3SS,	0.067	n/a
14:103871413|103894777	103877982:103878102	ES,	0.067	n/a
16:22260076|22262643	22261975:22262016	A5SS,	0.067	n/a
16:22260076|22262643	22262476:22262643	A3SS,	0.067	n/a
17:80992911|81006661	81006347:81006440	A3SS,	0.067	n/a
2:63711738|63720074	63719680:63719745	ES,	0.067	n/a
4:4650704|4651269	4650704:4651269	IR,	0.067	n/a
7:103801520|103808973	103803021:103803102	ES,	0.067	n/a
10:74468041|74475660	74475520:74475660	A3SS,	0.066	n/a
10:76074425|76158337	76140687:76140749	ES,	0.066	n/a
1:119805525|119820595	119805525:119805562	A5SS,	0.064	n/a
15:72855735|72864506	72862505:72862648	A3SS,	0.062	n/a
2:242028603|242033847	242029718:242029814	ES,A5SS,	0.062	n/a
6:170852689|170858201	170852689:170852809	A3SS,	0.062	n/a
1:119805525|119820595	119812338:119812401	ES,	0.061	n/a
17:1746097|1747980	1747214:1747321	A5SS,	0.061	n/a
3:145838899|145842016	145841052:145841108	A3SS,	0.061	n/a
5:39002637|39021238	39008687:39008748	ES,	0.06	n/a
1:225195115|225284941	225275728:225275831	ES,	0.059	n/a
12:70671912|70704797	70695485:70695645	ES,	0.059	n/a
2:143642918|143685310	143659803:143659901	ES,	0.059	n/a
20:30954187|30989835	30978878:30978970	ES,A3SS,	0.059	n/a
22:28692186|28702631	28693568:28693644	A3SS,	0.059	n/a
5:65284463|65310553	65292956:65293044	ES,	0.059	n/a
6:159004986|159010814	159010680:159010814	A3SS,	0.059	n/a
7:6736970|6737442	6737320:6737442	A5SS,	0.059	n/a
9:74810416|74817658	74812378:74812463	ES,A3SS,	0.059	n/a
2:240929491|240946787	240942466:240942553	ES,A3SS,	0.058	n/a
9:114148657|114154104	114152264:114152377	ES,A3SS,	0.058	n/a
12:11126254|11199787	11187381:11187484	ES,	0.057	n/a
2:9048751|9098771	9079950:9080063	ES,	0.057	n/a
4:148860976|148876525	148860976:148861038	A5SS,	0.057	n/a
16:69404386|69406258	69404386:69404647	A3SS,	0.056	n/a
3:52946554|52950230	52946554:52946638	A3SS,	0.056	n/a
11:86778736|86802437	86783945:86784012	ES,	0.055	n/a
12:46633462|46648719	46634210:46634288	ES,	0.055	n/a
16:89484692|89488713	89485736:89485856	ES,	0.055	n/a
3:4452549|4461830	4458260:4458343	ES,	0.055	n/a
7:2269619|2270362	2270180:2270362	A5SS,	0.055	n/a
9:74817487|74834422	74823141:74823254	ES,	0.055	n/a
9:95030456|95032265	95032160:95032265	A5SS,	0.055	n/a
14:71880665|71996087	71975097:71975266	ES,	0.054	n/a
14:80963812|80997230	80963812:80963957	A3SS,	0.054	n/a
17:36517594|36533668	36520635:36520739	ES,	0.054	n/a
X:72797243|72804408	72798428:72798621	A3SS,	0.054	n/a
10:65140078|65214849	65213156:65213256	ES,	0.053	n/a
10:96201653|96234540	96204203:96204296	ES,	0.053	n/a
14:80971255|80997230	80993513:80993605	ES,	0.053	n/a
5:72370569|72373320	72372277:72372436	ES,	0.053	n/a
6:107824861|107827631	107826229:107826270	ES,	0.053	n/a
7:130737184|130738224	130737184:130737372	A3SS,	0.053	n/a
7:80439927|80458061	80439927:80440055	A3SS,	0.053	n/a
7:158580695|158591763	158583871:158584050	ES,	0.052	n/a
14:102506573|102507010	102506573:102506776	A5SS,	0.051	n/a
3:4403723|4418073	4403723:4403924	A3SS,	0.051	n/a
1:8601273|8617582	8616534:8616603	A3SS,	0.05	n/a
2:72692289|72707879	72692289:72692470	A3SS,	0.05	n/a
2:72692289|72707879	72707777:72707879	A5SS,	0.05	n/a
9:36597219|36607670	36597883:36597937	ES,	0.05	n/a
1:180366651|180382606	180382210:180382300	ES,	0.049	n/a
1:92798948|92846430	92829266:92829327	ES,	0.048	n/a
18:55833020|55919286	55895062:55895139	ES,	0.048	n/a
20:30954187|30978970	30978884:30978970	A3SS,	0.048	n/a
5:65307877|65310553	65307877:65307967	A5SS,	0.048	n/a
7:74119496|74133260	74131218:74131270	A3SS,	0.048	n/a
X:53661188|53681075	53664254:53664335	ES,	0.048	n/a
9:74838036|74846097	74842842:74842956	A3SS,	0.047	n/a
X:71681854|71684581	71681854:71681952	A3SS,	0.047	n/a
12:28458582|28544344	28458582:28458712	A5SS,	0.045	n/a
14:105814830|105821514	105817683:105817723	ES,	0.045	n/a
20:31379407|31380576	31380417:31380576	A3SS,	0.045	n/a
20:36685934|36694658	36694205:36694277	ES,	0.045	n/a
21:46538479|46554747	46548324:46548488	A3SS,	0.045	n/a
21:46538479|46554747	46548313:46548488	A3SS,	0.045	n/a
22:30384469|30387659	30387500:30387659	A3SS,	0.045	n/a
5:167915607|167921655	167919689:167919852	A3SS,	0.045	n/a
5:167915607|167921655	167915607:167915723	A5SS,	0.045	n/a
7:152007051|152012423	152012274:152012423	A5SS,	0.044	n/a
9:96233423|96261168	96233423:96233499	A5SS,	0.043	n/a
2:64083440|64085070	64083922:64084016	ES,	0.042	n/a
6:101163338|101173579	101164582:101164684	ES,	0.042	n/a
3:138289160|138291826	138290079:138290198	A5SS,	0.041	n/a
7:27668990|27689252	27688167:27688263	ES,	0.041	n/a
15:59548483|59564648	59552020:59552132	ES,	0.04	n/a
2:184016236|184025923	184025842:184025923	A3SS,	0.04	n/a
22:40948110|40990739	40986546:40986669	ES,A5SS,	0.04	n/a
22:40948110|40990739	40986413:40986669	ES,A5SS,	0.04	n/a
4:115380370|115412085	115407309:115407389	ES,	0.04	n/a
7:152007051|152012423	152008578:152008641	ES,	0.04	n/a
X:67731691|67742759	67742655:67742759	A3SS,	0.04	n/a
7:152007051|152012423	152008998:152009031	ES,A5SS,	0.039	n/a
7:158580695|158591763	158581036:158581100	A3SS,	0.039	n/a
9:74817487|74828907	74823141:74823254	ES,A5SS,	0.039	n/a
1:42730786|42776781	42744019:42744455	A3SS,	0.038	n/a
16:16101673|16110478	16110419:16110478	A3SS,	0.038	n/a
17:59853762|59857762	59857392:59857449	ES,	0.038	n/a
6:42559889|42562042	42560268:42560352	ES,A3SS,	0.038	n/a
13:96636058|96651561	96637493:96637557	ES,	0.037	n/a
3:195101738|195133645	195132485:195132580	ES,	0.037	n/a
4:48686690|48712715	48686690:48686810	A3SS,	0.037	n/a
4:48686690|48712715	48712561:48712715	A5SS,	0.037	n/a
1:197611841|197627499	197616185:197616244	ES,	0.036	n/a
12:28458582|28460682	28459743:28459878	A3SS,	0.036	n/a
16:89484692|89497734	89485736:89485833	ES,	0.036	n/a
6:87925621|87928449	87925621:87925680	A5SS,	0.036	n/a
11:106849345|106856857	106849623:106849666	ES,A3SS,	0.035	n/a
7:74119496|74133260	74133180:74133260	A3SS,	0.035	n/a
8:30332295|30361953	30336436:30336489	ES,	0.034	n/a
1:92798948|92846430	92798948:92799018	A5SS,	0.033	n/a
12:116534474|116549317	116547846:116548064	ES,	0.033	n/a
14:80963812|80997230	80993513:80993605	ES,	0.033	n/a
22:50810449|50832564	50832443:50832564	A3SS,	0.033	n/a
3:196118684|196129890	196120421:196120490	A5SS,	0.033	n/a
7:63796637|63797360	63797282:63797360	A3SS,	0.033	n/a
18:45391430|45396935	45395614:45395841	A3SS,	0.032	n/a
9:74817487|74828907	74828816:74828907	A3SS,	0.032	n/a
14:71880665|71996087	71933748:71933964	ES,A3SS,	0.031	n/a
14:71880665|71996087	71933764:71933964	ES,A3SS,	0.031	n/a
17:29483001|29490394	29489880:29489955	ES,	0.031	n/a
19:17387304|17387718	17387304:17387433	A5SS,	0.031	n/a
5:134388144|134411078	134410118:134410218	A3SS,	0.031	n/a
7:74119496|74133260	74129177:74129236	ES,	0.031	n/a
1:180366651|180382606	180371504:180371594	ES,	0.03	n/a
12:39223181|39268313	39241715:39241777	ES,	0.03	n/a
15:25650608|25660989	25653767:25653831	ES,A5SS,	0.03	n/a
21:38792601|38845182	38802571:38802707	ES,A5SS,	0.03	n/a
6:158994452|159010814	159010716:159010814	A3SS,	0.03	n/a
8:48196617|48206619	48200662:48200711	ES,	0.03	n/a
1:213251038|213290752	213261304:213261372	ES,	0.029	n/a
8:141874411|141900868	141884562:141884629	ES,	0.028	n/a
8:18656805|18662408	18662032:18662132	A3SS,	0.028	n/a
3:138289160|138291826	138289876:138289976	A3SS,	0.027	n/a
5:58476421|58511794	58482144:58482201	ES,	0.027	n/a
17:80842021|80858607	80858472:80858607	A3SS,	0.026	n/a
6:87925621|87928449	87927423:87927570	ES,	0.026	n/a
1:23356962|23377013	23366752:23366927	ES,	0.024	n/a
14:50136242|50141145	50140841:50140961	A3SS,	0.024	n/a
16:15973661|15978062	15976806:15976905	ES,	0.024	n/a
2:176835492|176860374	176858873:176859008	ES,A5SS,	0.024	n/a
2:207144264|207162097	207162014:207162097	A3SS,	0.024	n/a
21:38792601|38802702	38794080:38794168	ES,A3SS,	0.024	n/a
21:38792601|38802702	38792601:38792690	A5SS,	0.024	n/a
22:46096162|46114373	46098647:46098727	A3SS,	0.024	n/a
9:138773479|138774924	138774061:138774222	ES,A3SS,	0.024	n/a
9:95018962|95032265	95032160:95032265	A5SS,	0.024	n/a
3:196831774|196846401	196842798:196842895	A3SS,	0.023	n/a
7:43679048|43680248	43680159:43680248	A5SS,	0.023	n/a
8:18656805|18662408	18658780:18658817	A3SS,	0.023	n/a
12:117423011|117426674	117426487:117426674	A3SS,	0.022	n/a
12:117423011|117426674	117423011:117423138	A5SS,	0.022	n/a
22:46125305|46136418	46136230:46136418	A3SS,	0.022	n/a
5:65307877|65310553	65310076:65310222	ES,	0.022	n/a
11:46098305|46113774	46112006:46112132	ES,A3SS,	0.021	n/a
12:116668338|116675510	116671857:116671892	ES,	0.021	n/a
12:70671912|70704797	70691539:70691659	ES,	0.021	n/a
17:79937060|79943483	79939113:79939176	ES,	0.021	n/a
22:30032740|30038274	30035202:30035320	ES,	0.021	n/a
1:21415631|21437876	21423682:21423819	ES,	0.02	n/a
14:76642966|76662315	76646653:76646739	ES,	0.02	n/a
19:18650181|18650530	18650370:18650530	A5SS,	0.02	n/a
22:42204879|42206295	42204879:42205111	A5SS,	0.02	n/a
1:247320302|247323115	247320302:247320509	A3SS,	0.019	n/a
21:16386665|16415895	16412684:16412737	ES,	0.019	n/a
3:4452549|4461830	4458812:4458952	A3SS,	0.019	n/a
3:157839892|157841780	157841661:157841780	A3SS,	0.018	n/a
8:99718695|99719539	99719386:99719539	A5SS,	0.018	n/a
8:99718695|99719539	99718695:99718831	A3SS,	0.018	n/a
9:95030456|95032265	95030456:95030574	A3SS,	0.018	n/a
1:247318868|247323115	247320302:247320423	ES,A3SS,	0.017	n/a
1:42730786|42744343	42744144:42744343	A5SS,	0.017	n/a
1:42730786|42744343	42731447:42731583	ES,	0.017	n/a
1:8601273|8617582	8611267:8611415	ES,	0.017	n/a
17:80992911|81006661	81006583:81006661	A5SS,	0.017	n/a
5:95091100|95099324	95099223:95099324	A3SS,	0.017	n/a
7:24663285|24681487	24663681:24663775	ES,	0.017	n/a
9:74838036|74846097	74843075:74843126	ES,	0.017	n/a
17:80842021|80861354	80858472:80858607	ES,A3SS,	0.016	n/a
2:207144264|207162097	207162057:207162097	A3SS,	0.016	n/a
3:11399892|11468400	11468351:11468400	A3SS,	0.016	n/a
3:11399892|11468400	11421446:11421506	ES,A5SS,	0.016	n/a
7:33185854|33217203	33192313:33192467	A5SS,	0.016	n/a
10:86177527|86185649	86177527:86177605	A5SS,	0.015	n/a
10:86177527|86185649	86185520:86185649	A3SS,	0.015	n/a
20:30954187|30989835	30978884:30978970	ES,A3SS,	0.015	n/a
11:106849345|106856857	106849623:106849681	ES,A3SS,	0.014	n/a
6:105280917|105291173	105281457:105281551	ES,	0.014	n/a
7:27668990|27672064	27668990:27669058	A3SS,	0.014	n/a
5:179688684|179707608	179688684:179688782	A3SS,	0.013	n/a
2:61749746|61753656	61752627:61752694	ES,	0.012	n/a
3:196831774|196846401	196831774:196831894	A3SS,	0.012	n/a
5:619105|620376	620193:620376	A3SS,	0.012	n/a
17:79937060|79943483	79940490:79940552	ES,	0.011	n/a
1:92798948|92846430	92815179:92815303	ES,A3SS,	0.01	n/a
1:92798948|92846430	92815209:92815303	ES,A3SS,	0.01	n/a
17:29483001|29497015	29489880:29489955	ES,	0.01	n/a
6:159001972|159010814	159010680:159010814	A3SS,	0.01	n/a
7:128655033|128658211	128656365:128656445	ES,	0.01	n/a
7:27668990|27689252	27676295:27676356	ES,	0.01	n/a
1:247320302|247323115	247323012:247323115	A5SS,	0.009	n/a
10:96201653|96234540	96218237:96218352	ES,	0.009	n/a
14:71880665|71996087	71964571:71964606	ES,	0.009	n/a
2:72945232|72960247	72958284:72958364	ES,A3SS,	0.009	n/a
9:138773479|138774924	138774061:138774274	ES,A3SS,	0.009	n/a
9:138773479|138774924	138773479:138773536	A3SS,	0.009	n/a
10:86177527|86185649	86185463:86185649	A3SS,	0.008	n/a
11:46515158|46529920	46519581:46519617	ES,	0.008	n/a
14:71880665|71996087	71884825:71884913	ES,A3SS,	0.008	n/a
14:81362062|81372425	81372304:81372425	A5SS,	0.008	n/a
3:196118684|196129890	196127500:196127603	ES,	0.008	n/a
1:247302018|247323115	247318868:247318997	ES,	0.007	n/a
18:45391430|45396935	45394423:45394468	ES,	0.007	n/a
21:16386665|16415895	16415038:16415136	ES,	0.007	n/a
5:176370336|176385155	176372038:176372139	ES,	0.007	n/a
6:159004986|159010814	159006336:159006421	A5SS,	0.007	n/a
6:159004986|159010814	159010716:159010814	A3SS,	0.007	n/a
9:20819795|20823114	20820147:20820192	ES,	0.007	n/a
1:247320302|247323115	247320302:247320478	A3SS,	0.006	n/a
2:240929491|240946787	240945165:240945251	ES,A3SS,	0.006	n/a
5:619105|620376	620182:620376	A3SS,	0.006	n/a
5:619105|620376	619105:619204	A5SS,	0.006	n/a
12:116668338|116675510	116674962:116675078	ES,	0.005	n/a
13:33091994|33101669	33099321:33099390	ES,	0.005	n/a
14:99924616|99932150	99925158:99925228	ES,	0.005	n/a
2:61749746|61761038	61756201:61756294	ES,	0.005	n/a
7:27668990|27689252	27686771:27686900	ES,	0.005	n/a
8:18656805|18662408	18657079:18657157	ES,	0.005	n/a
1:94107860|94140497	94132652:94132785	ES,	0.004	n/a
2:58449077|58459247	58449077:58449162	A3SS,	0.004	n/a
10:7318854|7327916	7325866:7326112	A3SS,	0.003	n/a
12:46633462|46637097	46634210:46634288	ES,	0.003	n/a
15:43120126|43132631	43132056:43132196	ES,	0.003	n/a
17:57842332|57851246	57842332:57842495	A5SS,	0.003	n/a
2:61749746|61761038	61752177:61752238	ES,	0.003	n/a
3:196831774|196846401	196831774:196831868	A3SS,	0.003	n/a
9:96233423|96238620	96236515:96236612	ES,	0.003	n/a
12:46622936|46637097	46635519:46635700	ES,	0.002	n/a
2:72945232|72960247	72958284:72958411	ES,A3SS,	0.002	n/a
2:72945232|72960247	72958136:72958175	ES,A3SS,	0.002	n/a
22:46085592|46114373	46108999:46109071	ES,	0.002	n/a
12:46622936|46637097	46634210:46634288	ES,	0.001	n/a
X:53672263|53681075	53675516:53675562	ES,	0.001	n/a

## Sheet: SRR5889367_NCM460_rep3
circRNA_id	alternatively_spliced_exon	AS_type	psi_estimation_without_correction	psi_estimation_after_correction
1:8525985|8617582	8555123:8555222	ES,	1	n/a
1:21327692|21329301	21327692:21327805	A3SS,	1	n/a
1:21377359|21437876	21415631:21415706	ES,	1	n/a
1:32502511|32504220	32503436:32503637	A5SS,	1	n/a
1:51204535|51218195	51218084:51218195	A5SS,	1	n/a
1:51253672|51323669	51267303:51267349	A3SS,	1	n/a
1:51860053|51866625	51860053:51860119	A3SS,	1	n/a
1:245180544|245222760	245185471:245185598	ES,	1	n/a
1:247318868|247323115	247318868:247318997	A3SS,	1	n/a
10:7285520|7327916	7325866:7325921	A3SS,	1	n/a
10:35772332|35790463	35789556:35789638	ES,	1	n/a
10:47121121|47122969	47121121:47121263	A3SS,	1	n/a
10:93185038|93221941	93221852:93221941	A3SS,	1	n/a
10:93902786|93940776	93904702:93904869	A3SS,	1	n/a
10:124151819|124166189	124151819:124151888	A5SS,	1	n/a
11:12883797|12886447	12886233:12886295	ES,	1	n/a
11:85718585|85742653	85718585:85718626	A3SS,	1	n/a
11:85718585|85742653	85722073:85722179	A5SS,	1	n/a
11:86778736|86802437	86782565:86782657	ES,	1	n/a
12:65702309|65762806	65753285:65753482	A5SS,	1	n/a
12:70901675|70921518	70916304:70916410	ES,	1	n/a
13:33054727|33101669	33101545:33101669	A5SS,	1	n/a
13:96637493|96648389	96642227:96642327	A3SS,	1	n/a
13:96837104|96840751	96837104:96837174	A5SS,	1	n/a
13:113170754|113176823	113174200:113174335	A3SS,	1	n/a
13:113845186|113854830	113845186:113845289	A3SS,	1	n/a
14:45716369|45731147	45731010:45731147	A3SS,	1	n/a
14:55423752|55424353	55424137:55424222	ES,	1	n/a
15:72859447|72864506	72862518:72862648	A5SS,	1	n/a
16:24979672|24981901	24979982:24980093	A3SS,	1	n/a
16:89961446|89967202	89961446:89961545	A5SS,	1	n/a
17:1746097|1756483	1747214:1747292	A3SS,	1	n/a
17:4186093|4200104	4192525:4192703	A3SS,	1	n/a
17:73927310|73934313	73927310:73927491	A3SS,	1	n/a
2:44729828|44732869	44732772:44732869	A3SS,	1	n/a
2:58425714|58459247	58449077:58449177	A3SS,	1	n/a
2:58425729|58459247	58449077:58449177	A3SS,	1	n/a
2:61605498|61622368	61607304:61607496	A5SS,	1	n/a
2:64083440|64085070	64083440:64083567	A5SS,	1	n/a
2:114670749|114674585	114673579:114673616	ES,	1	n/a
2:122260743|122287901	122273241:122273338	ES,	1	n/a
2:169018297|169038600	169023809:169023917	A3SS,	1	n/a
20:50290692|50307358	50305603:50305678	A3SS,	1	n/a
20:50292671|50314021	50305603:50305678	A3SS,	1	n/a
21:46538479|46548488	46540709:46540874	A5SS,	1	n/a
21:46538479|46554747	46540709:46540874	A5SS,	1	n/a
21:46540709|46548488	46540802:46540874	A5SS,	1	n/a
22:40749077|40750331	40749077:40749237	A5SS,	1	n/a
3:4403723|4418073	4403723:4403938	A3SS,	1	n/a
3:17549966|17628049	17549966:17550097	A3SS,	1	n/a
3:28293203|28295256	28294480:28294576	ES,	1	n/a
3:33106955|33114205	33109722:33109782	A3SS,	1	n/a
3:33109722|33110462	33109722:33109782	A3SS,	1	n/a
3:47747899|47777616	47770515:47770584	ES,	1	n/a
3:65606749|65607763	65606749:65606817	A3SS,	1	n/a
3:136191255|136196254	136192381:136192479	A3SS,	1	n/a
3:138289160|138291826	138289160:138289340	A3SS,	1	n/a
3:180651122|180653019	180652515:180652586	ES,	1	n/a
3:197592294|197598333	197592983:197593090	ES,	1	n/a
5:65284463|65290692	65288538:65288735	A3SS,	1	n/a
5:87581561|87588460	87587201:87587297	ES,	1	n/a
5:111595588|111602027	111595588:111595676	A3SS,	1	n/a
5:130883740|130940386	130883740:130883883	A3SS,	1	n/a
5:132219032|132220811	132219032:132219252	A3SS,	1	n/a
5:132219032|132220811	132219811:132219880	ES,	1	n/a
6:25605040|25606501	25606289:25606501	A3SS,	1	n/a
6:106696025|106740981	106696025:106696119	A3SS,	1	n/a
6:106696025|106740981	106728090:106728124	ES,	1	n/a
6:106696025|106756366	106696025:106696119	A3SS,	1	n/a
6:108243001|108250718	108243001:108243113	A3SS,	1	n/a
7:2269619|2270399	2269619:2269778	A3SS,	1	n/a
7:5096926|5097410	5096926:5097052	A5SS,	1	n/a
7:27668990|27676356	27671955:27672048	A3SS,	1	n/a
7:35707044|35712888	35709825:35709938	A3SS,	1	n/a
7:95838150|95864229	95838150:95838289	A3SS,	1	n/a
7:95838150|95906650	95838150:95838289	A3SS,	1	n/a
7:128282271|128289036	128287977:128288095	ES,	1	n/a
8:25126361|25136181	25135932:25136181	A3SS,	1	n/a
8:128231055|128236720	128231055:128231211	A3SS,	1	n/a
9:114148657|114154104	114152264:114152381	A3SS,	1	n/a
9:114332371|114348445	114337014:114337122	A3SS,	1	n/a
9:115030329|115060196	115030329:115030475	A3SS,	1	n/a
9:136726496|136804341	136769518:136769651	A5SS,	1	n/a
9:138741983|138758382	138754313:138754454	ES,	1	n/a
X:21869627|21871621	21869627:21869730	A5SS,	1	n/a
X:21869627|21871621	21871494:21871621	A3SS,	1	n/a
X:73494177|73504783	73500212:73500329	A5SS,	1	n/a
X:102094729|102120080	102094729:102094900	A5SS,	1	n/a
5:137320946|137324004	137323963:137324004	A5SS,	0.998	n/a
10:7318854|7327916	7325866:7325921	A3SS,	0.997	n/a
12:46622936|46637097	46623347:46623422	A3SS,	0.996	n/a
20:30954187|30959677	30959581:30959677	A3SS,	0.996	n/a
2:58449077|58459247	58456949:58457009	ES,	0.995	n/a
3:157839892|157841780	157841655:157841780	A3SS,	0.995	n/a
1:52959283|52975384	52962678:52962855	ES,	0.994	n/a
14:81362062|81372425	81372299:81372425	A5SS,	0.992	n/a
3:196831774|196846401	196831774:196831876	A3SS,	0.992	n/a
X:53672263|53681075	53674311:53674517	ES,	0.99	n/a
12:111990084|111993723	111991962:111992021	ES,	0.989	n/a
3:196118684|196129890	196120425:196120490	A5SS,	0.987	n/a
15:89656956|89659752	89656956:89657055	A5SS,	0.985	n/a
17:80858527|80869665	80861281:80861354	ES,	0.985	n/a
9:74838036|74846097	74842859:74842956	A3SS,	0.984	n/a
9:74838036|74846097	74840593:74840700	A5SS,	0.984	n/a
7:33185854|33217203	33192313:33192463	A5SS,	0.982	n/a
2:176835492|176860374	176844538:176844596	ES,	0.981	n/a
2:240929491|240946787	240944627:240944712	A5SS,	0.979	n/a
5:95091100|95099324	95091100:95091465	IR,	0.979	n/a
1:246600450|246603426	246600450:246600513	A3SS,	0.977	n/a
12:28458582|28460682	28458582:28458739	A5SS,	0.976	n/a
10:1130343|1142186	1132226:1132297	ES,	0.974	n/a
12:28378728|28412375	28408514:28408595	ES,	0.973	n/a
2:72945232|72960247	72958136:72958181	ES,	0.972	n/a
11:46515158|46534363	46529741:46529920	ES,	0.971	n/a
12:11181000|11199787	11181000:11181114	A3SS,	0.971	n/a
2:58311224|58316858	58315476:58315581	A3SS,	0.971	n/a
2:58449077|58459247	58449077:58449177	A3SS,	0.971	n/a
6:159004986|159010814	159010704:159010814	A3SS,	0.971	n/a
4:148860976|148887990	148887831:148887990	A3SS,	0.966	n/a
1:92798948|92846430	92798948:92799030	A5SS,	0.964	n/a
2:72945232|72960247	72958284:72958374	ES,A3SS,	0.964	n/a
7:56049903|56051561	56051421:56051561	A3SS,	0.964	n/a
14:50130033|50141145	50136242:50136316	ES,	0.963	n/a
13:96637493|96648389	96638587:96638686	A3SS,	0.962	n/a
3:171830242|171944737	171851261:171851336	ES,	0.962	n/a
17:28934570|28937960	28937907:28937960	A3SS,	0.959	n/a
3:11399892|11468400	11421446:11421526	ES,	0.959	n/a
15:75215989|75219228	75215989:75216111	A3SS,	0.957	n/a
5:38523521|38530768	38527257:38527396	A5SS,	0.957	n/a
5:38523521|38530768	38523521:38523684	A3SS,	0.957	n/a
7:158580695|158591763	158581036:158581108	A3SS,	0.956	n/a
14:103470265|103478525	103478434:103478525	A5SS,	0.955	n/a
5:167915607|167921655	167921555:167921655	A3SS,	0.955	n/a
22:46085592|46098727	46088876:46088958	ES,	0.952	n/a
4:36212012|36216102	36214018:36214109	A3SS,	0.952	n/a
17:59853762|59857762	59857622:59857762	A5SS,	0.951	n/a
5:38991051|39021238	38991051:38991177	A3SS,	0.951	n/a
1:41578955|41582682	41578955:41579198	A3SS,	0.95	n/a
7:74119496|74133260	74133198:74133260	A3SS,	0.95	n/a
16:69404386|69406258	69404386:69404532	A3SS,	0.949	n/a
3:138289160|138291826	138289876:138289999	A3SS,	0.948	n/a
3:142455221|142467302	142467100:142467302	A3SS,	0.948	n/a
5:619105|620376	620184:620376	A3SS,	0.948	n/a
15:80412670|80415142	80412670:80412840	A5SS,	0.947	n/a
20:21346059|21349228	21346211:21346342	A3SS,	0.946	n/a
22:30032740|30038274	30035079:30035201	ES,	0.946	n/a
5:38991051|39021238	39002637:39002768	A5SS,	0.946	n/a
7:158580695|158591763	158586341:158586417	A3SS,	0.946	n/a
12:28458582|28544344	28458582:28458739	A5SS,	0.944	n/a
17:80842021|80858607	80847544:80847573	A5SS,	0.944	n/a
7:22999875|23030758	23000854:23000941	ES,	0.941	n/a
17:1746097|1747980	1747214:1747292	A3SS,	0.94	n/a
3:196842798|196846401	196842798:196842954	A3SS,	0.94	n/a
14:104245082|104263855	104251132:104251251	ES,	0.938	n/a
22:25771780|25777545	25771780:25771975	A3SS,	0.938	n/a
22:30032740|30038274	30032740:30032865	A5SS,	0.938	n/a
6:17665470|17669777	17669206:17669259	ES,	0.938	n/a
11:128993341|129034322	128993783:128993824	ES,	0.937	n/a
14:61482622|61512885	61497163:61497241	A3SS,	0.931	n/a
4:78694235|78697546	78695684:78695870	A3SS,	0.93	n/a
1:42730786|42776781	42744019:42744343	A3SS,	0.929	n/a
13:114806476|114839312	114817527:114817630	ES,	0.929	n/a
2:78225204|78252550	78226102:78226166	A3SS,	0.929	n/a
16:89484692|89497734	89497664:89497734	A5SS,	0.926	n/a
2:45925080|45928663	45927678:45927784	ES,	0.926	n/a
3:11399892|11421526	11406133:11406208	ES,	0.925	n/a
1:94360170|94367225	94362174:94362376	A5SS,	0.923	n/a
14:71880665|71979562	71884847:71884913	ES,	0.923	n/a
4:148860976|148887990	148860976:148861050	A5SS,	0.923	n/a
10:74468041|74475660	74475612:74475660	A3SS,	0.922	n/a
1:9991949|9995685	9994830:9994918	A5SS,	0.917	n/a
12:100598718|100601564	100599454:100599522	A5SS,	0.917	n/a
19:1147308|1154401	1147308:1147419	A3SS,	0.917	n/a
7:33185854|33195314	33192313:33192463	A5SS,	0.917	n/a
10:94733810|94774024	94757231:94757372	ES,	0.915	n/a
12:19615444|19626289	19615444:19615651	A5SS,	0.914	n/a
17:4186093|4200109	4192525:4192703	A3SS,	0.913	n/a
1:9991949|9994918	9994820:9994918	A5SS,	0.909	n/a
11:85692788|85707972	85692915:85693046	A3SS,	0.909	n/a
15:56434976|56535485	56436599:56436681	A3SS,	0.909	n/a
7:152007051|152012423	152008883:152009031	A5SS,	0.909	n/a
8:38947566|38948865	38948778:38948865	A3SS,	0.909	n/a
14:99924616|99932150	99925450:99925522	A3SS,	0.906	n/a
3:3178944|3182332	3178944:3179137	A5SS,	0.905	n/a
3:149563798|149639014	149638921:149639014	A3SS,	0.905	n/a
11:46098305|46113774	46098305:46098370	A3SS,	0.904	n/a
11:11895347|11901927	11895347:11895406	A5SS,	0.897	n/a
11:46098305|46113774	46112006:46112117	ES,A3SS,	0.896	n/a
1:197621365|197684204	197643250:197643299	ES,	0.893	n/a
5:95091100|95099324	95091364:95091465	ES,	0.892	n/a
7:27668990|27689252	27671955:27672064	A3SS,	0.891	n/a
1:70766447|70781249	70771907:70771973	ES,	0.889	n/a
11:18022044|18031686	18031622:18031686	A5SS,	0.889	n/a
17:80842021|80869665	80847544:80847573	ES,	0.889	n/a
7:2269619|2270359	2269619:2269778	A3SS,	0.889	n/a
12:22796697|22826594	22796697:22796956	IR,	0.887	n/a
2:61749746|61753656	61752405:61752468	ES,	0.886	n/a
20:25614685|25626284	25615365:25615463	ES,	0.886	n/a
12:51173923|51203372	51189692:51189792	A3SS,	0.883	n/a
7:130737184|130738224	130738162:130738224	A5SS,	0.882	n/a
2:109463194|109473426	109473250:109473426	A3SS,	0.88	n/a
5:38991051|39021238	38996921:38996984	ES,	0.88	n/a
12:124123811|124137282	124132510:124132673	ES,	0.879	n/a
17:58756814|58786686	58766293:58766407	ES,	0.879	n/a
17:80842021|80861354	80858527:80858607	ES,A3SS,	0.879	n/a
11:77394755|77404656	77396150:77396204	ES,	0.877	n/a
1:247319708|247323115	247319708:247320519	A3SS,	0.875	n/a
14:73614503|73614802	73614675:73614802	A3SS,	0.875	n/a
8:48192450|48206619	48192450:48192605	A5SS,	0.875	n/a
8:141874411|141935848	141889570:141889736	ES,	0.875	n/a
3:145838899|145842016	145839758:145839820	ES,	0.873	n/a
17:80842021|80869665	80851423:80851508	ES,	0.871	n/a
19:21280991|21281716	21281618:21281716	A3SS,	0.87	n/a
X:106331666|106332069	106331666:106332069	IR,	0.869	n/a
15:90414707|90432372	90420538:90420656	ES,	0.867	n/a
3:149563798|149639014	149613260:149613357	A5SS,	0.867	n/a
20:25614685|25626284	25614685:25614806	A5SS,	0.864	n/a
4:148860976|148876525	148860976:148861050	A5SS,	0.864	n/a
1:212502477|212506940	212506839:212506940	A3SS,	0.863	n/a
1:63944435|63955889	63952240:63952444	ES,	0.857	n/a
17:4186093|4210418	4200012:4200109	ES,A3SS,	0.857	n/a
2:45773871|45789895	45774661:45774751	ES,	0.857	n/a
2:215657021|215661841	215657021:215657169	A3SS,	0.857	n/a
3:149563798|149639014	149629765:149629870	ES,A5SS,	0.857	n/a
5:37243115|37247847	37244477:37244709	ES,	0.857	n/a
8:38994176|39044564	39022743:39022780	ES,	0.857	n/a
9:125042722|125054119	125048059:125048225	ES,	0.857	n/a
15:80412670|80415142	80414054:80414162	A3SS,	0.853	n/a
10:74468041|74475660	74468041:74468114	A5SS,	0.85	n/a
5:170667932|170669824	170667932:170668146	A5SS,	0.85	n/a
6:146209156|146216113	146214351:146214529	ES,	0.85	n/a
12:20774230|20792891	20782842:20783061	ES,	0.846	n/a
15:50592986|50593565	50593418:50593565	A5SS,	0.846	n/a
21:45165960|45168961	45166997:45167173	ES,	0.846	n/a
7:17885218|17890587	17889970:17890058	A5SS,	0.846	n/a
X:67731691|67742759	67738612:67738654	ES,	0.846	n/a
17:8354098|8363478	8358114:8358205	ES,	0.842	n/a
4:140037803|140060651	140058784:140059021	ES,	0.842	n/a
5:109049221|109051965	109051821:109051965	A3SS,	0.842	n/a
19:17387304|17387718	17387304:17387718	IR,	0.836	n/a
1:245165423|245180628	245180184:245180281	ES,	0.833	n/a
1:247320302|247323115	247320302:247320519	A3SS,	0.833	n/a
10:518379|532470	532399:532470	A5SS,	0.833	n/a
11:85692788|85695016	85692915:85693046	A3SS,	0.833	n/a
12:117402502|117426674	117423011:117423207	ES,	0.833	n/a
14:103449893|103452917	103449893:103450093	A3SS,	0.833	n/a
16:56419831|56423287	56423097:56423287	A5SS,	0.833	n/a
17:81006347|81006661	81006545:81006661	A5SS,	0.833	n/a
2:225421012|225422573	225421012:225421161	A3SS,	0.833	n/a
22:29025540|29027116	29027066:29027116	A5SS,	0.833	n/a
1:231090079|231097049	231090079:231090149	A3SS,	0.829	n/a
3:138407717|138413749	138413628:138413749	A5SS,	0.826	n/a
2:197777606|197787849	197787822:197787849	A5SS,	0.824	n/a
5:170648762|170669824	170667932:170668146	A5SS,	0.821	n/a
10:70218861|70229920	70225424:70225569	ES,	0.818	n/a
16:30740287|30740893	30740287:30740552	A5SS,	0.818	n/a
5:76745585|76760634	76747116:76747178	A3SS,	0.818	n/a
9:102888665|102894236	102891958:102892026	ES,	0.818	n/a
21:38792601|38802702	38801169:38801210	ES,	0.815	n/a
15:75215989|75221573	75215989:75216111	A3SS,	0.812	n/a
5:130883740|130940386	130897671:130897740	ES,	0.81	n/a
12:29812813|29814312	29814247:29814312	A5SS,	0.808	n/a
12:28378728|28412375	28379073:28379132	ES,	0.807	n/a
11:86267595|86270865	86268994:86269035	ES,	0.806	n/a
9:33971649|33973235	33971649:33971752	A3SS,	0.805	n/a
21:38792601|38802702	38797992:38798083	ES,	0.804	n/a
1:229596358|229599423	229599276:229599423	A5SS,	0.8	n/a
10:518379|532470	530721:530888	ES,	0.8	n/a
10:93902786|93952393	93952303:93952393	A5SS,	0.8	n/a
11:85722073|85742653	85737334:85737409	ES,	0.8	n/a
12:50821545|50822873	50822718:50822873	A3SS,	0.8	n/a
12:109210814|109212334	109212212:109212334	A5SS,	0.8	n/a
12:111991962|111993723	111992670:111992878	A3SS,	0.8	n/a
13:96622366|96648389	96636058:96636118	ES,	0.8	n/a
15:43164809|43170882	43164809:43164956	A3SS,	0.8	n/a
17:20922397|20931987	20922397:20922498	A3SS,	0.8	n/a
19:21280991|21281716	21281266:21281349	ES,	0.8	n/a
2:240078348|240085619	240085499:240085619	A5SS,	0.8	n/a
21:16386665|16417644	16415816:16415895	A3SS,	0.8	n/a
6:83728692|83754378	83732172:83732280	A5SS,	0.8	n/a
7:8062113|8110761	8095066:8095179	A3SS,	0.8	n/a
8:56854414|56860282	56854414:56854550	A5SS,	0.8	n/a
8:117737148|117738411	117737148:117737288	A3SS,	0.8	n/a
1:212502477|212506940	212502477:212502673	A5SS,	0.795	n/a
3:47762156|47787483	47770515:47770584	ES,	0.795	n/a
9:102814699|102822454	102816319:102816449	ES,A3SS,	0.794	n/a
14:61482622|61512885	61503777:61503859	ES,	0.789	n/a
1:225140372|225156576	225142661:225142800	A3SS,	0.788	n/a
14:71880665|71933964	71884847:71884913	ES,	0.788	n/a
1:16119332|16123438	16119332:16119550	A3SS,	0.778	n/a
1:36437625|36439112	36437625:36437833	A5SS,	0.778	n/a
13:42385361|42407667	42393354:42393522	A3SS,	0.778	n/a
13:96622366|96651561	96642227:96642327	ES,	0.778	n/a
17:4186093|4210418	4192525:4192703	ES,	0.778	n/a
2:78225204|78252550	78225606:78225671	ES,	0.778	n/a
2:239090706|239093928	239092294:239092381	ES,	0.778	n/a
5:92889467|92899169	92890833:92890907	ES,	0.778	n/a
X:306251|308428	307969:308071	A3SS,	0.778	n/a
7:17908030|17937069	17932955:17933057	A3SS,	0.774	n/a
1:77672325|77678032	77677980:77678032	A5SS,	0.769	n/a
12:28458582|28544344	28460578:28460682	A5SS,	0.769	n/a
5:108219097|108295048	108290453:108290633	A5SS,	0.769	n/a
6:155108995|155114110	155113957:155114110	A3SS,	0.769	n/a
15:72300167|72320134	72311380:72311436	ES,	0.765	n/a
7:156516806|156619438	156526871:156526951	ES,	0.765	n/a
14:84112888|84132553	84117565:84117811	ES,A3SS,	0.762	n/a
1:197611841|197643299	197627430:197627499	ES,	0.76	n/a
14:59923156|59927891	59925575:59925722	A3SS,	0.76	n/a
2:169404106|169417832	169414602:169414671	ES,	0.76	n/a
13:61013822|61041513	61018817:61018882	A3SS,	0.759	n/a
20:35236118|35238133	35236293:35236403	ES,	0.756	n/a
11:12883797|12886447	12886233:12886447	IR,	0.753	n/a
1:22074631|22078108	22075279:22075376	ES,	0.75	n/a
1:146724278|146731572	146726525:146726631	ES,	0.75	n/a
10:69797850|69826974	69804161:69804315	A3SS,	0.75	n/a
10:116719485|116734144	116731894:116732033	A3SS,	0.75	n/a
11:9309249|9316934	9309989:9310082	A3SS,	0.75	n/a
11:9983504|10011142	10011044:10011142	A5SS,	0.75	n/a
12:27148170|27156323	27148170:27148393	A3SS,	0.75	n/a
12:122181535|122190129	122188272:122188345	A3SS,	0.75	n/a
14:34924993|34926101	34924993:34925134	A3SS,	0.75	n/a
14:71970329|71996087	71979460:71979562	A3SS,	0.75	n/a
15:85607601|85610435	85610223:85610435	A3SS,	0.75	n/a
20:47591303|47592736	47591303:47591411	A5SS,	0.75	n/a
20:56993267|57009761	57009480:57009562	ES,	0.75	n/a
21:16386665|16415895	16387466:16387546	ES,	0.75	n/a
4:115380370|115412085	115406806:115406883	A3SS,	0.75	n/a
5:76745585|76785397	76749387:76749454	ES,	0.75	n/a
7:65892936|65904291	65894666:65894744	ES,	0.75	n/a
8:38994176|39044564	39022549:39022627	ES,	0.75	n/a
X:102094729|102120080	102100785:102100948	ES,	0.75	n/a
14:71880665|71996087	71884847:71884913	ES,	0.746	n/a
6:42559889|42562042	42560248:42560352	ES,	0.744	n/a
9:33953283|33963789	33956077:33956144	ES,	0.742	n/a
15:75215989|75221573	75219107:75219228	ES,	0.739	n/a
2:190656516|190682906	190660495:190660677	ES,	0.739	n/a
20:36685934|36694658	36694483:36694658	A3SS,	0.739	n/a
8:37623044|37623873	37623044:37623264	IR,	0.736	n/a
10:15838099|15889942	15858834:15858914	ES,	0.733	n/a
14:39623415|39628754	39628654:39628754	A5SS,	0.733	n/a
10:74474869|74475660	74475520:74475660	A3SS,	0.731	n/a
12:28408514|28412375	28408935:28409011	ES,	0.729	n/a
21:38792601|38802702	38794076:38794168	ES,	0.728	n/a
1:42744019|42776781	42744019:42744455	A3SS,	0.727	n/a
11:77433733|77436744	77436590:77436744	A5SS,	0.727	n/a
12:109212025|109212334	109212212:109212334	A5SS,	0.727	n/a
14:102506573|102507010	102506573:102506747	A5SS,	0.727	n/a
2:78225204|78229268	78225606:78225671	A5SS,	0.727	n/a
5:136794690|136795421	136795354:136795421	A5SS,	0.727	n/a
7:33388680|33427756	33390831:33390935	ES,	0.727	n/a
8:141749117|141762415	141753329:141753429	A3SS,	0.727	n/a
9:20881870|20916936	20885108:20885229	A3SS,	0.727	n/a
15:56686363|56687032	56686363:56686445	A5SS,	0.724	n/a
15:56686363|56687032	56686859:56687032	A3SS,	0.724	n/a
19:9767223|9771550	9768901:9768965	ES,	0.724	n/a
1:21415631|21437876	21431610:21431751	ES,	0.723	n/a
18:9775275|9815219	9792151:9792232	ES,	0.722	n/a
22:48081949|48082955	48082324:48082444	A3SS,	0.72	n/a
13:61013822|61034674	61018817:61018882	A3SS,	0.716	n/a
1:52293468|52299842	52293468:52293541	A3SS,	0.714	n/a
1:78324623|78329713	78329579:78329713	A3SS,	0.714	n/a
10:15858834|15889942	15863655:15863725	ES,	0.714	n/a
12:20076132|20097478	20088701:20088767	ES,	0.714	n/a
12:44124409|44125561	44124874:44125031	ES,	0.714	n/a
13:96622366|96651561	96648317:96648389	ES,	0.714	n/a
19:13039156|13039661	13039349:13039477	A5SS,	0.714	n/a
2:169404106|169417832	169416944:169417047	ES,	0.714	n/a
3:182804481|182810333	182804481:182804576	A3SS,	0.714	n/a
5:95099212|95119667	95115956:95116129	A5SS,	0.714	n/a
2:10784446|10808849	10794607:10794673	ES,	0.706	n/a
2:197777606|197787849	197786827:197786910	A3SS,	0.706	n/a
1:10155519|10165802	10161166:10161253	A5SS,	0.7	n/a
10:96201653|96204296	96204228:96204296	A3SS,	0.7	n/a
4:139993020|139994721	139993020:139993193	A3SS,	0.7	n/a
2:175779786|175816930	175809898:175809989	ES,	0.696	n/a
12:28458582|28544344	28515371:28515448	ES,A3SS,	0.692	n/a
12:117383169|117402659	117387423:117387511	ES,	0.692	n/a
15:72810408|72848248	72837161:72837305	ES,	0.692	n/a
7:105103068|105108910	105105760:105105861	ES,	0.692	n/a
7:156554828|156619438	156589083:156589186	ES,	0.692	n/a
22:38208894|38209616	38208894:38208995	A5SS,	0.688	n/a
10:69726440|69773943	69748420:69748592	ES,	0.684	n/a
14:76633006|76662315	76647107:76647192	ES,	0.684	n/a
8:141749117|141762415	141754751:141754866	ES,A5SS,	0.682	n/a
14:31139462|31144271	31142463:31142553	A3SS,	0.679	n/a
2:44436349|44445676	44440835:44440896	ES,	0.677	n/a
2:234296903|234299129	234298575:234298687	ES,A3SS,	0.672	n/a
3:31917925|31921322	31920922:31921045	ES,	0.671	n/a
1:84644860|84650865	84649720:84649818	ES,	0.667	n/a
1:161748034|161753886	161748034:161748110	A5SS,	0.667	n/a
10:15838099|15889942	15863655:15863725	ES,	0.667	n/a
12:48490126|48495299	48491777:48491907	A3SS,	0.667	n/a
13:96622366|96651561	96638587:96638686	ES,	0.667	n/a
14:31139462|31169464	31142441:31142553	A3SS,	0.667	n/a
15:62871704|62881961	62873107:62873209	ES,	0.667	n/a
16:4774751|4777178	4776660:4776781	ES,	0.667	n/a
16:22260076|22262643	22261975:22262012	ES,	0.667	n/a
16:88008654|88017865	88008654:88008791	A5SS,	0.667	n/a
18:697240|706578	697240:697414	A3SS,	0.667	n/a
2:38542426|38546161	38544381:38544491	ES,	0.667	n/a
2:70451686|70463307	70456396:70456450	A5SS,	0.667	n/a
20:32605216|32619410	32610467:32610521	ES,	0.667	n/a
20:33057853|33069011	33059249:33059320	A3SS,	0.667	n/a
3:113207792|113218429	113212896:113212989	ES,	0.667	n/a
3:149563798|149639014	149619859:149619949	ES,	0.667	n/a
4:54249940|54266006	54256688:54256752	A5SS,	0.667	n/a
4:54249940|54266006	54265897:54266006	A3SS,	0.667	n/a
4:148827789|148834290	148827789:148827870	A5SS,	0.667	n/a
5:14673751|14681716	14678790:14678884	A5SS,	0.667	n/a
5:36211946|36227667	36219698:36219781	A5SS,	0.667	n/a
5:41794105|41807540	41805669:41805783	A5SS,	0.667	n/a
7:8095063|8110761	8110713:8110761	A3SS,	0.667	n/a
9:74817487|74828907	74828802:74828907	A3SS,	0.667	n/a
9:108483818|108510471	108483818:108483926	A5SS,	0.667	n/a
3:57875768|57882659	57881974:57882098	ES,	0.664	n/a
8:141874411|141900868	141889570:141889736	ES,	0.662	n/a
11:61133517|61135470	61134900:61135470	IR,	0.655	n/a
3:119219542|119232566	119222379:119222467	ES,	0.655	n/a
12:47497896|47501947	47499831:47499907	ES,	0.652	n/a
12:70671912|70713144	70688017:70688074	ES,	0.647	n/a
12:27521195|27530497	27529279:27529320	A5SS,	0.643	n/a
2:215657021|215661841	215657851:215657949	ES,	0.643	n/a
4:88005272|88012981	88010689:88010842	ES,A3SS,	0.643	n/a
1:63944435|63974241	63952240:63952444	ES,	0.636	n/a
2:153431650|153437563	153432783:153432889	ES,	0.634	n/a
4:85818064|85853516	85833405:85833472	ES,	0.634	n/a
12:120995085|120995485	120995085:120995485	IR,	0.63	n/a
16:31733947|31734674	31734579:31734674	A3SS,	0.63	n/a
8:141856359|141900868	141889570:141889736	ES,	0.627	n/a
18:60206914|60217693	60209731:60209807	A3SS,	0.625	n/a
2:190656516|190670480	190660495:190660677	A5SS,	0.625	n/a
21:37619815|37620866	37620678:37620866	A3SS,	0.625	n/a
5:108281831|108295048	108290430:108290633	A5SS,	0.625	n/a
5:110077748|110083964	110079431:110079573	ES,	0.625	n/a
2:64083440|64085070	64084684:64084852	ES,A3SS,	0.62	n/a
12:11181000|11199787	11187381:11187484	ES,	0.617	n/a
12:109046048|109048186	109046814:109046957	ES,	0.616	n/a
16:22360600|22361170	22360600:22360790	A3SS,	0.615	n/a
3:48215774|48219478	48215774:48215906	A3SS,	0.615	n/a
1:231081135|231097049	231092167:231092228	ES,	0.6	n/a
11:77330651|77336863	77336762:77336863	A5SS,	0.6	n/a
12:1136914|1137738	1136914:1137738	IR,	0.6	n/a
12:70193989|70195501	70193989:70194117	A5SS,	0.6	n/a
12:124123811|124137282	124137079:124137108	A3SS,	0.6	n/a
13:41202653|41207385	41202653:41202842	A3SS,	0.6	n/a
13:96622366|96648389	96642227:96642327	ES,	0.6	n/a
15:72810408|72853890	72837161:72837305	ES,	0.6	n/a
18:60015401|60017170	60015942:60016066	ES,	0.6	n/a
19:4941540|4941943	4941540:4941943	IR,	0.6	n/a
2:33002949|33012216	33005121:33005179	A5SS,	0.6	n/a
2:168920010|168986268	168986051:168986111	A3SS,	0.6	n/a
5:37213661|37224842	37213661:37213834	A3SS,	0.6	n/a
7:6472468|6476164	6474393:6474651	A5SS,	0.6	n/a
8:19442677|19459376	19445387:19445534	ES,	0.6	n/a
X:24190832|24197887	24193506:24193560	ES,	0.6	n/a
21:46548317|46554747	46554630:46554747	A3SS,	0.588	n/a
12:112371690|112381173	112374496:112374634	ES,	0.583	n/a
4:89570991|89579642	89577026:89577186	ES,	0.583	n/a
2:207144264|207162097	207145274:207145317	ES,	0.573	n/a
10:99915850|99923154	99917220:99917330	ES,	0.571	n/a
10:124151819|124157490	124151819:124151884	A5SS,	0.571	n/a
14:71880665|71933964	71933764:71933964	A3SS,	0.571	n/a
20:13532534|13550233	13539655:13539761	A5SS,	0.571	n/a
3:113207792|113218429	113212053:113212159	A3SS,	0.571	n/a
3:149563798|149619949	149613260:149613347	A5SS,	0.571	n/a
4:41145004|41179707	41179647:41179707	A5SS,	0.571	n/a
5:107684100|107703654	107700439:107700696	A5SS,	0.571	n/a
6:42941741|42942776	42941741:42941824	A3SS,	0.571	n/a
7:156516806|156619438	156518129:156518219	ES,	0.571	n/a
1:93621857|93625783	93624372:93624442	ES,	0.565	n/a
12:109212025|109217137	109212208:109212334	A5SS,	0.565	n/a
14:39620950|39628754	39623415:39623498	ES,	0.565	n/a
3:195101738|195133645	195131436:195131738	ES,	0.565	n/a
10:12442015|12445368	12442702:12442884	ES,	0.562	n/a
1:70758071|70781249	70779428:70779473	ES,	0.561	n/a
13:33091994|33101669	33101545:33101669	A5SS,	0.559	n/a
1:176118142|176153828	176132963:176133027	ES,	0.556	n/a
1:225273412|225284941	225275728:225275831	ES,	0.556	n/a
12:116668338|116675510	116669864:116669961	ES,	0.556	n/a
14:71880665|72043304	71884847:71884913	ES,	0.556	n/a
15:25650608|25657118	25653767:25653831	ES,	0.556	n/a
2:175779786|175816930	175805544:175805622	ES,	0.556	n/a
4:54249940|54266006	54257176:54257306	ES,	0.556	n/a
6:150092298|150094305	150093150:150093383	ES,	0.556	n/a
X:112291554|112293180	112291554:112291651	A5SS,	0.55	n/a
15:56434976|56535485	56471468:56471501	ES,A5SS,	0.545	n/a
15:94899366|94928754	94901776:94901841	A3SS,	0.545	n/a
1:23356962|23370979	23366752:23366927	ES,	0.543	n/a
1:176132005|176153828	176132951:176133027	A5SS,	0.538	n/a
10:104018686|104103939	104092165:104092283	ES,	0.538	n/a
14:39620950|39628754	39628654:39628754	A5SS,	0.538	n/a
11:85685751|85695016	85692915:85693046	A3SS,	0.536	n/a
22:50810449|50832564	50830296:50830444	ES,A3SS,	0.529	n/a
22:28910745|28915308	28913144:28913267	ES,	0.521	n/a
16:21350242|21363459	21353829:21353907	ES,	0.52	n/a
10:124151819|124184475	124151819:124151884	A5SS,	0.517	n/a
2:32399132|32409407	32400388:32400430	ES,	0.517	n/a
3:52988333|53003274	52996225:52996271	ES,	0.517	n/a
14:39623415|39628754	39627489:39627606	ES,	0.514	n/a
5:179688684|179707608	179706796:179707036	ES,	0.514	n/a
1:41651793|41660071	41658447:41658572	ES,	0.5	n/a
1:52954581|52959334	52957868:52957947	ES,	0.5	n/a
1:176118142|176153828	176145046:176145143	ES,	0.5	n/a
1:197611841|197684204	197627430:197627499	ES,	0.5	n/a
1:225339707|225373127	225341452:225341528	ES,	0.5	n/a
1:235582788|235597595	235594020:235594119	ES,	0.5	n/a
10:12277047|12280484	12277243:12277329	ES,	0.5	n/a
12:28408514|28460682	28457559:28457644	ES,	0.5	n/a
12:69924070|69925836	69925295:69925549	ES,	0.5	n/a
13:113170754|113181798	113174200:113174335	ES,A3SS,	0.5	n/a
13:113219425|113223573	113221705:113221785	ES,	0.5	n/a
14:61482622|61512885	61510168:61510221	ES,	0.5	n/a
14:61497163|61512885	61503777:61503859	ES,	0.5	n/a
15:25650608|25660989	25660857:25660989	A5SS,	0.5	n/a
15:25650608|25660989	25660862:25660989	A5SS,	0.5	n/a
15:72292192|72320134	72311380:72311436	ES,	0.5	n/a
15:89790860|89804074	89790860:89790957	A5SS,	0.5	n/a
15:89790860|89804074	89790860:89790962	A5SS,	0.5	n/a
17:28808161|28811788	28808161:28808241	A5SS,	0.5	n/a
17:28808161|28811788	28808161:28808275	A5SS,	0.5	n/a
17:35797839|35800763	35797839:35797930	A5SS,	0.5	n/a
17:35797839|35800763	35797839:35798023	A5SS,	0.5	n/a
17:59853762|59857762	59853762:59853863	A3SS,	0.5	n/a
17:59853762|59857762	59853762:59853923	A3SS,	0.5	n/a
19:17387304|17387718	17387632:17387718	A3SS,	0.5	n/a
19:17387304|17387718	17387604:17387718	A3SS,	0.5	n/a
2:26321531|26332775	26332645:26332775	A3SS,	0.5	n/a
2:26321531|26332775	26332637:26332775	A3SS,	0.5	n/a
2:120885264|120932580	120925453:120925583	ES,	0.5	n/a
2:120885264|120932580	120925042:120925083	ES,	0.5	n/a
2:225400245|225422573	225421012:225421137	ES,A3SS,	0.5	n/a
2:240929491|240946787	240939600:240939804	ES,	0.5	n/a
20:39896103|39897723	39897619:39897723	A5SS,	0.5	n/a
20:39896103|39897723	39897630:39897723	A5SS,	0.5	n/a
20:56993267|57016139	57009658:57009761	ES,	0.5	n/a
3:123652520|123666166	123652520:123652593	A3SS,	0.5	n/a
3:123652520|123666166	123663696:123663837	A5SS,	0.5	n/a
3:123652520|123666166	123652520:123652602	A3SS,	0.5	n/a
3:123652520|123666166	123663718:123663837	A5SS,	0.5	n/a
3:136183484|136183830	136183484:136183830	IR,	0.5	n/a
3:185316200|185318643	185316200:185316285	A5SS,	0.5	n/a
3:185316200|185318643	185316200:185316333	A5SS,	0.5	n/a
4:54292039|54294350	54294264:54294350	A3SS,	0.5	n/a
4:54292039|54294350	54294194:54294350	A3SS,	0.5	n/a
5:118264232|118280344	118279495:118279597	ES,A3SS,	0.5	n/a
5:118264232|118280344	118279495:118279612	ES,A3SS,	0.5	n/a
6:158850768|158852695	158852573:158852695	A3SS,	0.5	n/a
6:158850768|158852695	158852616:158852695	A3SS,	0.5	n/a
8:6582391|6612695	6599182:6599272	ES,	0.5	n/a
X:130498723|130503026	130502342:130502423	ES,	0.5	n/a
10:124151819|124184475	124151819:124151888	A5SS,	0.483	n/a
21:38792601|38845182	38794076:38794168	ES,	0.483	n/a
12:65720606|65762806	65753285:65753482	ES,A5SS,	0.472	n/a
11:36103203|36120011	36103775:36103877	ES,	0.471	n/a
21:40600426|40601362	40601040:40601145	ES,	0.471	n/a
12:116668338|116675510	116674626:116674695	ES,	0.466	n/a
11:85685751|85695016	85692915:85693031	A3SS,	0.464	n/a
X:71681854|71684581	71682212:71682292	ES,	0.463	n/a
1:176132005|176153828	176132963:176133027	A5SS,	0.462	n/a
14:39620950|39628754	39628687:39628754	A5SS,	0.462	n/a
1:155695173|155695810	155695173:155695810	IR,	0.458	n/a
1:231090079|231097049	231092167:231092306	ES,A3SS,	0.455	n/a
11:20424465|20448411	20426424:20426529	ES,	0.455	n/a
12:39223181|39242464	39241715:39241777	ES,	0.455	n/a
13:60667762|60686320	60676927:60677048	ES,	0.455	n/a
15:94899366|94928754	94901711:94901841	A3SS,	0.455	n/a
16:11791981|11815526	11794308:11794420	ES,	0.455	n/a
17:80842021|80869665	80861281:80861354	ES,	0.455	n/a
2:70451686|70457986	70452460:70452525	ES,	0.455	n/a
20:10536879|10541468	10537967:10538074	ES,	0.455	n/a
12:19615444|19626289	19619682:19619784	ES,	0.45	n/a
X:112291554|112293180	112291554:112291623	A5SS,	0.45	n/a
10:69748420|69773943	69749968:69750066	ES,	0.448	n/a
5:41794105|41807540	41794779:41794851	ES,	0.446	n/a
3:182804481|182810333	182808724:182808819	ES,	0.444	n/a
13:33091994|33101669	33101595:33101669	A5SS,	0.441	n/a
12:109212025|109217137	109212212:109212334	A5SS,	0.435	n/a
2:9419446|9437574	9427133:9427241	ES,	0.433	n/a
10:124151819|124157490	124151819:124151888	A5SS,	0.429	n/a
12:77234143|77243250	77235805:77235886	ES,	0.429	n/a
14:71880665|71933964	71933836:71933964	A3SS,	0.429	n/a
2:70451686|70463307	70456191:70456219	ES,	0.429	n/a
20:13532534|13550233	13539663:13539761	A5SS,	0.429	n/a
3:113207792|113218429	113212053:113212121	A3SS,	0.429	n/a
3:149563798|149619949	149613260:149613357	A5SS,	0.429	n/a
4:41145004|41179707	41179576:41179707	A5SS,	0.429	n/a
5:107684100|107703654	107700604:107700696	A5SS,	0.429	n/a
6:42941741|42942776	42941741:42941843	A3SS,	0.429	n/a
6:87925621|87943245	87932488:87932612	ES,	0.429	n/a
8:141856359|141874498	141857273:141857399	ES,	0.429	n/a
9:108467878|108484902	108476647:108476786	ES,	0.429	n/a
14:71880665|71996087	71970329:71970385	ES,	0.423	n/a
1:51926763|51930998	51929679:51929736	ES,	0.422	n/a
21:38792601|38845182	38802571:38802702	ES,	0.414	n/a
21:46548317|46554747	46554672:46554747	A3SS,	0.412	n/a
17:80842021|80869665	80858527:80858607	ES,	0.407	n/a
12:28378728|28412375	28408935:28409011	ES,	0.404	n/a
1:23356962|23377013	23370920:23370979	ES,	0.403	n/a
10:52220433|52350007	52226650:52226692	ES,	0.4	n/a
11:77330651|77336863	77336822:77336863	A5SS,	0.4	n/a
12:70193989|70195501	70193989:70194112	A5SS,	0.4	n/a
12:80109331|80114122	80109779:80109852	ES,	0.4	n/a
12:124123811|124137282	124137071:124137108	A3SS,	0.4	n/a
13:31789188|31803431	31797871:31797963	ES,	0.4	n/a
13:41202653|41207385	41202653:41202819	A3SS,	0.4	n/a
2:33002949|33012216	33005121:33005161	A5SS,	0.4	n/a
2:168920010|168986268	168986051:168986116	A3SS,	0.4	n/a
5:37213661|37224842	37213661:37213854	A3SS,	0.4	n/a
7:6472468|6476164	6474425:6474651	A5SS,	0.4	n/a
9:100839200|100840629	100840344:100840629	A3SS,	0.4	n/a
X:67494580|67518938	67500297:67500373	ES,	0.4	n/a
1:180366651|180382606	180370657:180370754	ES,A5SS,	0.397	n/a
6:150092298|150094305	150093691:150093820	ES,	0.396	n/a
1:180366651|180382606	180370657:180370915	IR,	0.394	n/a
3:47762156|47777616	47762919:47762986	ES,	0.391	n/a
1:78324623|78332076	78324999:78325071	ES,	0.385	n/a
11:128993341|129034322	128997107:128997200	ES,	0.385	n/a
16:22360600|22361170	22360600:22360764	A3SS,	0.385	n/a
3:48215774|48219478	48215774:48215947	A3SS,	0.385	n/a
3:149563798|149619949	149619499:149619641	ES,	0.385	n/a
15:72837161|72864506	72855735:72855841	ES,	0.375	n/a
18:60206914|60217693	60209777:60209807	A3SS,	0.375	n/a
2:190656516|190670480	190660495:190660682	A5SS,	0.375	n/a
20:10536879|10541468	10541089:10541139	ES,	0.375	n/a
21:37619815|37620866	37620691:37620866	A3SS,	0.375	n/a
5:108281831|108295048	108290430:108290568	A5SS,	0.375	n/a
9:102677460|102691125	102684484:102684577	ES,	0.375	n/a
16:31733947|31734674	31734382:31734674	A3SS,	0.37	n/a
7:141336760|141349133	141341048:141341198	ES,	0.36	n/a
12:27521195|27530497	27529279:27529349	A5SS,	0.357	n/a
2:207144264|207162097	207156738:207156840	ES,	0.353	n/a
1:94924163|94941293	94939322:94939391	ES,	0.333	n/a
1:108724563|108728576	108727765:108727892	ES,A5SS,	0.333	n/a
1:161748034|161753886	161748034:161748106	A5SS,	0.333	n/a
12:28378728|28460682	28379073:28379132	ES,	0.333	n/a
12:48490126|48495299	48491777:48491920	A3SS,	0.333	n/a
13:43986052|43987124	43986553:43986591	ES,	0.333	n/a
13:96622366|96651561	96636058:96636118	ES,	0.333	n/a
13:100953714|100962162	100958005:100958088	ES,	0.333	n/a
13:100959446|101077985	100992411:100992513	ES,	0.333	n/a
14:31139462|31169464	31142463:31142553	A3SS,	0.333	n/a
14:76642966|76662315	76644551:76644665	ES,	0.333	n/a
16:68300496|68309152	68307698:68307807	ES,A3SS,	0.333	n/a
17:58756814|58824640	58766293:58766407	ES,	0.333	n/a
18:697240|706578	697240:697355	A3SS,	0.333	n/a
2:32515552|32526564	32523303:32523380	ES,	0.333	n/a
2:70451686|70463307	70456392:70456450	A5SS,	0.333	n/a
20:33057853|33069011	33059203:33059320	A3SS,	0.333	n/a
21:46536848|46564616	46558213:46558355	ES,	0.333	n/a
22:45970391|45972988	45972192:45972310	ES,	0.333	n/a
3:3178944|3186394	3182194:3182332	ES,	0.333	n/a
3:11868192|11880788	11874477:11874625	ES,	0.333	n/a
4:54249940|54266006	54265906:54266006	A3SS,	0.333	n/a
4:54249940|54266006	54256688:54256795	A5SS,	0.333	n/a
4:128590191|128609022	128597060:128597220	ES,	0.333	n/a
4:148827789|148834290	148827789:148827886	A5SS,	0.333	n/a
5:14673751|14681716	14678790:14678912	A5SS,	0.333	n/a
5:36211946|36227667	36219708:36219781	A5SS,	0.333	n/a
5:41794105|41807540	41805724:41805783	A5SS,	0.333	n/a
5:76394480|76414346	76401481:76401514	ES,	0.333	n/a
5:79974746|80057497	80015303:80015354	ES,	0.333	n/a
5:179688684|179714067	179706796:179706887	ES,	0.333	n/a
7:8095063|8110761	8110551:8110761	A3SS,	0.333	n/a
7:47520701|47568745	47551915:47552046	ES,	0.333	n/a
8:19442677|19459376	19457281:19457330	ES,	0.333	n/a
9:74817487|74828907	74828816:74828907	A3SS,	0.333	n/a
9:108483818|108510471	108483818:108484002	A5SS,	0.333	n/a
5:138614016|138614818	138614254:138614429	ES,A3SS,	0.325	n/a
14:31139462|31144271	31142441:31142553	A3SS,	0.321	n/a
7:156516806|156619438	156518458:156518531	ES,	0.314	n/a
22:38208894|38209616	38208894:38209017	A5SS,	0.312	n/a
1:77672325|77678032	77677722:77677777	ES,	0.31	n/a
13:20425495|20426330	20425495:20426330	IR,	0.304	n/a
7:74119496|74131270	74129177:74129236	ES,	0.304	n/a
16:68300496|68309152	68307721:68307807	ES,A3SS,	0.303	n/a
1:10155519|10165802	10161166:10161282	A5SS,	0.3	n/a
10:96201653|96204296	96204203:96204296	A3SS,	0.3	n/a
4:139993020|139994721	139993020:139993157	A3SS,	0.3	n/a
9:100839200|100840629	100840475:100840629	A3SS,	0.3	n/a
9:100839200|100840629	100840576:100840629	A3SS,	0.3	n/a
20:30954187|30989835	30959581:30959677	ES,	0.299	n/a
1:47761437|47767420	47765577:47765824	IR,	0.297	n/a
17:59853762|59857762	59855481:59855540	ES,	0.297	n/a
15:25650608|25660989	25652214:25652284	ES,A3SS,	0.296	n/a
2:168869144|168921891	168872985:168873157	ES,	0.294	n/a
2:197777606|197787849	197786827:197786919	A3SS,	0.294	n/a
7:50771518|50823753	50799969:50800065	ES,	0.294	n/a
X:44820529|44896934	44870206:44870264	ES,	0.294	n/a
1:52293468|52299842	52293468:52293558	A3SS,	0.286	n/a
1:78324623|78329713	78329640:78329713	A3SS,	0.286	n/a
10:22002701|22016857	22012879:22012981	ES,	0.286	n/a
11:128910823|128994789	128993783:128993824	ES,	0.286	n/a
17:80842021|80869665	80863812:80863929	ES,	0.286	n/a
19:13039156|13039661	13039387:13039477	A5SS,	0.286	n/a
3:182804481|182810333	182804481:182804572	A3SS,	0.286	n/a
5:95099212|95119667	95115956:95116024	A5SS,	0.286	n/a
13:61013822|61034674	61018821:61018882	A3SS,	0.284	n/a
21:38792601|38845182	38828432:38828610	ES,	0.28	n/a
22:48081949|48082955	48082298:48082444	A3SS,	0.28	n/a
15:56686363|56687032	56686874:56687032	A3SS,	0.276	n/a
15:56686363|56687032	56686363:56686424	A5SS,	0.276	n/a
1:42744019|42776781	42744019:42744343	A3SS,	0.273	n/a
1:231090079|231097049	231092167:231092228	ES,A3SS,	0.273	n/a
11:77433733|77436744	77436580:77436744	A5SS,	0.273	n/a
12:109212025|109212334	109212208:109212334	A5SS,	0.273	n/a
14:102506573|102507010	102506573:102506776	A5SS,	0.273	n/a
2:78225204|78229268	78225618:78225671	A5SS,	0.273	n/a
2:228356263|228389631	228378694:228378828	ES,	0.273	n/a
5:136794690|136795421	136795309:136795421	A5SS,	0.273	n/a
8:141749117|141762415	141753329:141753371	A3SS,	0.273	n/a
8:141749117|141762415	141754777:141754866	ES,A5SS,	0.273	n/a
9:20881870|20916936	20885146:20885229	A3SS,	0.273	n/a
9:33953283|33973235	33956077:33956144	ES,	0.273	n/a
10:74474869|74475660	74475612:74475660	A3SS,	0.269	n/a
3:31917925|31921322	31918172:31918236	ES,	0.268	n/a
14:39623415|39628754	39628687:39628754	A5SS,	0.267	n/a
22:50810449|50832564	50827463:50827540	ES,	0.267	n/a
11:76670023|76709865	76692841:76692966	ES,	0.263	n/a
17:60663496|60663827	60663496:60663827	IR,	0.263	n/a
18:9775275|9815219	9776212:9776330	ES,	0.263	n/a
3:197592294|197602646	197600220:197600432	ES,	0.263	n/a
10:96201653|96234540	96204228:96204296	ES,	0.261	n/a
20:36685934|36694658	36694489:36694658	A3SS,	0.261	n/a
14:62188227|62188541	62188227:62188541	IR,	0.26	n/a
10:69797850|69826974	69804161:69804320	A3SS,	0.25	n/a
10:116719485|116734144	116731910:116732033	A3SS,	0.25	n/a
11:9309249|9316934	9309989:9310089	A3SS,	0.25	n/a
11:9983504|10011142	10011040:10011142	A5SS,	0.25	n/a
12:27148170|27156323	27148170:27148341	A3SS,	0.25	n/a
12:122181535|122190129	122188286:122188345	A3SS,	0.25	n/a
13:96665561|96684225	96683153:96683205	ES,	0.25	n/a
14:34924993|34926101	34924993:34925110	A3SS,	0.25	n/a
14:71970329|71996087	71979485:71979562	A3SS,	0.25	n/a
15:25650608|25657118	25652214:25652409	ES,A3SS,	0.25	n/a
15:85607601|85610435	85610245:85610435	A3SS,	0.25	n/a
20:47591303|47592736	47591303:47591379	A5SS,	0.25	n/a
21:45012106|45033828	45016682:45016760	ES,	0.25	n/a
4:115380370|115412085	115406748:115406883	A3SS,	0.25	n/a
6:42992723|42993879	42992723:42993067	IR,	0.25	n/a
7:156516806|156619438	156520624:156520701	ES,	0.25	n/a
10:96201653|96234540	96207392:96207427	ES,	0.246	n/a
1:231079552|231097049	231092167:231092228	ES,	0.241	n/a
13:61013822|61041513	61018821:61018882	A3SS,	0.241	n/a
14:59923156|59927891	59925575:59925717	A3SS,	0.24	n/a
14:76633006|76647192	76644551:76644665	ES,	0.238	n/a
14:71880665|72043304	71970329:71970385	ES,	0.235	n/a
22:50810449|50832564	50830255:50830444	ES,A3SS,	0.235	n/a
1:77672325|77678032	77677905:77678032	A5SS,	0.231	n/a
12:28458582|28544344	28460578:28460676	A5SS,	0.231	n/a
12:28458582|28544344	28515378:28515448	ES,A3SS,	0.231	n/a
5:108219097|108295048	108290453:108290568	A5SS,	0.231	n/a
6:155108995|155114110	155113971:155114110	A3SS,	0.231	n/a
9:125832629|125839041	125833691:125833780	ES,	0.231	n/a
12:11126254|11199787	11187381:11187484	ES,	0.227	n/a
7:17908030|17937069	17932955:17933049	A3SS,	0.226	n/a
7:156516806|156619438	156521338:156521414	ES,	0.226	n/a
2:207144264|207162097	207145350:207145426	ES,	0.225	n/a
1:16119332|16123438	16119332:16119451	A3SS,	0.222	n/a
1:36437625|36439112	36437625:36437702	A5SS,	0.222	n/a
1:212190228|212194554	212194063:212194096	ES,	0.222	n/a
13:42385361|42407667	42393354:42393381	A3SS,	0.222	n/a
14:71880665|71979562	71970329:71970385	ES,	0.222	n/a
14:71880665|71996087	71995416:71995457	ES,	0.222	n/a
2:225400245|225422573	225421012:225421106	ES,A3SS,	0.222	n/a
5:179279020|179280437	179280197:179280437	IR,	0.222	n/a
X:306251|308428	307969:308061	A3SS,	0.222	n/a
12:116674626|116675510	116674962:116675078	ES,	0.216	n/a
X:71681854|71684581	71683326:71683396	ES,	0.213	n/a
1:225140372|225156576	225142639:225142800	A3SS,	0.212	n/a
12:116534474|116549317	116547579:116547674	ES,	0.212	n/a
12:72163580|72167802	72165885:72166008	ES,	0.211	n/a
12:120592774|120593523	120592774:120593234	IR,	0.207	n/a
1:176118142|176153828	176132005:176132124	ES,	0.2	n/a
1:229596358|229599423	229599290:229599423	A5SS,	0.2	n/a
10:93902786|93952393	93952234:93952393	A5SS,	0.2	n/a
11:85707869|85742653	85737334:85737409	ES,	0.2	n/a
12:50821545|50822873	50822700:50822873	A3SS,	0.2	n/a
12:109210814|109212334	109212208:109212334	A5SS,	0.2	n/a
12:111991962|111993723	111992670:111992873	A3SS,	0.2	n/a
13:31789188|31803431	31799005:31799056	ES,	0.2	n/a
15:43164809|43170882	43164809:43164894	A3SS,	0.2	n/a
17:20922397|20931987	20922397:20922487	A3SS,	0.2	n/a
2:240078348|240085619	240085505:240085619	A5SS,	0.2	n/a
20:30954187|30956926	30955443:30955532	ES,	0.2	n/a
20:32605216|32619410	32617575:32617733	ES,	0.2	n/a
21:16386665|16417644	16415816:16415891	A3SS,	0.2	n/a
5:76394480|76414346	76396061:76396216	ES,	0.2	n/a
6:83728692|83754378	83732198:83732280	A5SS,	0.2	n/a
7:8062113|8110761	8095063:8095179	A3SS,	0.2	n/a
7:65892936|65904291	65897309:65897371	ES,	0.2	n/a
8:56854414|56860282	56854414:56854487	A5SS,	0.2	n/a
8:117737148|117738411	117737148:117737336	A3SS,	0.2	n/a
8:141840571|141900868	141889570:141889736	ES,	0.2	n/a
9:33971649|33973235	33971649:33971735	A3SS,	0.195	n/a
12:29812813|29814312	29814251:29814312	A5SS,	0.192	n/a
14:84112888|84132553	84117707:84117811	ES,A3SS,	0.19	n/a
15:75215989|75221573	75215989:75216066	A3SS,	0.188	n/a
15:90414707|90432372	90421497:90421532	ES,	0.188	n/a
9:102677460|102691125	102678331:102678450	ES,A3SS,	0.185	n/a
1:246078832|246093239	246092814:246092854	ES,	0.182	n/a
16:30740287|30740893	30740287:30740350	A5SS,	0.182	n/a
5:76745585|76760634	76747116:76747171	A3SS,	0.182	n/a
5:170648762|170669824	170667932:170668121	A5SS,	0.179	n/a
X:24190832|24197887	24191724:24191840	ES,	0.179	n/a
16:21350242|21363459	21355599:21355723	ES,	0.176	n/a
19:30462100|30477324	30471066:30471157	ES,	0.176	n/a
2:197777606|197787849	197787738:197787849	A5SS,	0.176	n/a
9:102814699|102822454	102816319:102816489	ES,A3SS,	0.176	n/a
21:38792601|38802702	38794884:38794954	ES,	0.174	n/a
3:138407717|138413749	138413670:138413749	A5SS,	0.174	n/a
3:142455221|142467302	142462327:142462428	ES,	0.174	n/a
1:231090079|231097049	231090079:231090124	A3SS,	0.171	n/a
4:88005272|88012981	88010733:88010842	ES,A3SS,	0.171	n/a
1:108724563|108728576	108727838:108727892	ES,A5SS,	0.167	n/a
10:518379|532470	532395:532470	A5SS,	0.167	n/a
11:28700652|28763455	28704715:28704782	ES,	0.167	n/a
11:85692788|85695016	85692915:85693031	A3SS,	0.167	n/a
14:103449893|103452917	103449893:103450162	A3SS,	0.167	n/a
16:56419831|56423287	56423093:56423287	A5SS,	0.167	n/a
16:88008654|88017865	88008654:88008809	A5SS,	0.167	n/a
16:88008654|88017865	88008654:88008813	A5SS,	0.167	n/a
17:81006347|81006661	81006583:81006661	A5SS,	0.167	n/a
2:225421012|225422573	225421012:225421137	A3SS,	0.167	n/a
22:29025540|29027116	29026982:29027116	A5SS,	0.167	n/a
20:30954187|30989835	30978884:30978970	ES,	0.162	n/a
16:89484692|89488713	89485736:89485856	ES,	0.159	n/a
5:109049221|109051965	109051861:109051965	A3SS,	0.158	n/a
12:116668238|116675510	116674626:116674695	ES,	0.154	n/a
15:50592986|50593565	50593454:50593565	A5SS,	0.154	n/a
7:17885218|17890587	17890009:17890058	A5SS,	0.154	n/a
3:149563798|149639014	149619558:149619641	ES,	0.152	n/a
12:65720606|65762806	65753285:65753422	ES,A5SS,	0.151	n/a
10:74468041|74475660	74468041:74468128	A5SS,	0.15	n/a
5:170667932|170669824	170667932:170668121	A5SS,	0.15	n/a
10:7262373|7269899	7267226:7267337	ES,	0.148	n/a
15:80412670|80415142	80414090:80414162	A3SS,	0.147	n/a
2:61749746|61761038	61752405:61752468	ES,	0.147	n/a
1:247320302|247323115	247320302:247320423	A3SS,	0.145	n/a
10:486811|518489	495976:496304	ES,	0.143	n/a
12:936208|939326	938228:938348	ES,	0.143	n/a
12:11126254|11199787	11181000:11181114	ES,	0.143	n/a
12:70901675|70914047	70904188:70904357	ES,	0.143	n/a
2:169018297|169023917	169021781:169021806	ES,	0.143	n/a
2:215657021|215661841	215657021:215657157	A3SS,	0.143	n/a
4:106367540|106377902	106377405:106377448	ES,	0.143	n/a
7:105103068|105108910	105106496:105106597	ES,	0.143	n/a
7:156554828|156619438	156593504:156593717	ES,	0.143	n/a
9:34286615|34290387	34288361:34288482	ES,	0.143	n/a
1:180366651|180382606	180370846:180370915	ES,	0.14	n/a
2:240929491|240946787	240942466:240942553	ES,A3SS,	0.138	n/a
4:85818064|85853516	85822401:85822532	ES,	0.138	n/a
1:212502477|212506940	212502477:212502640	A5SS,	0.137	n/a
1:212502477|212506940	212506900:212506940	A3SS,	0.137	n/a
14:59923156|59927891	59927267:59927310	ES,	0.137	n/a
17:79937060|79943483	79940490:79940552	ES,	0.136	n/a
20:25614685|25626284	25614685:25614790	A5SS,	0.136	n/a
7:24663285|24681487	24663681:24663775	ES,	0.135	n/a
12:28408514|28412375	28408514:28409011	IR,	0.134	n/a
3:149563798|149639014	149613260:149613347	A5SS,	0.133	n/a
6:42559889|42562042	42560599:42560730	ES,A5SS,	0.133	n/a
19:21280991|21281716	21281621:21281716	A3SS,	0.13	n/a
9:74817487|74834422	74823141:74823254	ES,	0.129	n/a
2:176835492|176860374	176858873:176859008	ES,	0.128	n/a
1:247319708|247323115	247319708:247320705	A3SS,	0.125	n/a
12:51442817|51450285	51447561:51447643	ES,	0.125	n/a
14:73614503|73614802	73614651:73614802	A3SS,	0.125	n/a
5:138614016|138614818	138614267:138614429	ES,A3SS,	0.125	n/a
7:27668990|27689252	27688167:27688263	ES,	0.125	n/a
8:48192450|48206619	48192450:48192568	A5SS,	0.125	n/a
14:71970329|71996087	71995416:71995457	ES,	0.12	n/a
2:109463194|109473426	109473209:109473426	A3SS,	0.12	n/a
2:170728746|170735084	170734004:170734147	ES,	0.12	n/a
7:130737184|130738224	130738025:130738224	A5SS,	0.118	n/a
12:51173923|51203372	51189681:51189792	A3SS,	0.117	n/a
10:69797850|69804320	69798188:69798289	ES,	0.111	n/a
11:18022044|18031686	18031618:18031686	A5SS,	0.111	n/a
12:27867713|27877119	27873712:27873778	ES,	0.111	n/a
14:73550202|73554869	73552690:73552737	ES,	0.111	n/a
14:76330010|76368567	76349028:76349245	ES,	0.111	n/a
15:59548483|59564648	59552020:59552132	ES,	0.111	n/a
5:92889467|92899169	92894932:92895024	ES,	0.111	n/a
5:137320946|137328568	137323150:137323305	ES,	0.111	n/a
7:2269619|2270359	2269619:2269773	A3SS,	0.111	n/a
7:8062113|8110761	8064345:8064444	ES,	0.111	n/a
7:74119496|74131270	74129443:74129486	ES,	0.111	n/a
11:86778736|86802437	86783945:86784012	ES,	0.109	n/a
13:96636058|96651561	96637493:96637591	ES,	0.107	n/a
7:74119496|74133260	74129177:74129236	ES,	0.107	n/a
1:21377359|21415706	21399515:21399638	ES,	0.106	n/a
2:143642918|143685310	143659803:143659901	ES,	0.105	n/a
12:116534474|116549317	116547846:116548064	ES,	0.104	n/a
11:11895347|11901927	11895347:11895462	A5SS,	0.103	n/a
5:619105|620376	619105:620376	IR,	0.102	n/a
1:21415631|21437876	21424708:21424867	ES,	0.101	n/a
9:96233423|96261168	96236515:96236612	ES,	0.101	n/a
7:24663282|24681487	24663667:24663775	ES,	0.1	n/a
8:42780700|42798588	42783869:42783953	ES,	0.1	n/a
15:93540187|93541851	93541379:93541491	ES,	0.097	n/a
2:169404106|169417832	169407852:169407962	ES,	0.097	n/a
2:225400245|225422573	225421012:225421161	ES,A3SS,	0.097	n/a
11:46098305|46113774	46098305:46098391	A3SS,	0.096	n/a
14:71880665|71996087	71948872:71948928	ES,	0.096	n/a
14:35020920|35024118	35023496:35023613	ES,	0.095	n/a
3:3178944|3182332	3178944:3179157	A5SS,	0.095	n/a
14:99924616|99932150	99925450:99925518	A3SS,	0.094	n/a
11:86778736|86802437	86786679:86786828	ES,	0.093	n/a
1:9991949|9994918	9994830:9994918	A5SS,	0.091	n/a
11:85692788|85707972	85692915:85693031	A3SS,	0.091	n/a
12:70913979|70921518	70914566:70914708	ES,	0.091	n/a
13:96622366|96648389	96637493:96637591	ES,	0.091	n/a
15:56434976|56535485	56471464:56471501	ES,A5SS,	0.091	n/a
15:56434976|56535485	56436599:56436677	A3SS,	0.091	n/a
17:62515439|62519013	62517520:62517645	ES,	0.091	n/a
2:159922408|159954346	159932987:159933040	ES,	0.091	n/a
7:152007051|152012423	152008998:152009031	A5SS,	0.091	n/a
8:38947566|38948865	38948762:38948865	A3SS,	0.091	n/a
9:74817487|74828907	74823141:74823210	ES,	0.091	n/a
1:180366651|180382606	180370701:180370754	ES,A5SS,	0.09	n/a
17:4186093|4200109	4192525:4192662	A3SS,	0.087	n/a
2:240929491|240946787	240945165:240945258	ES,	0.087	n/a
12:19615444|19626289	19615444:19615637	A5SS,	0.086	n/a
3:4452549|4461830	4458260:4458343	ES,	0.086	n/a
4:148860976|148876525	148860976:148861038	A5SS,	0.086	n/a
5:170305101|170308900	170307161:170307235	ES,	0.086	n/a
1:9991949|9995685	9994820:9994918	A5SS,	0.083	n/a
12:100598718|100601564	100599454:100599535	A5SS,	0.083	n/a
19:1147308|1154401	1147308:1147386	A3SS,	0.083	n/a
7:33185854|33195314	33192313:33192467	A5SS,	0.083	n/a
14:71880665|71996087	71933764:71933964	ES,	0.081	n/a
1:247318868|247323115	247320302:247320519	ES,A3SS,	0.079	n/a
3:149563798|149639014	149638976:149639014	A3SS,	0.079	n/a
3:149563798|149639014	149629765:149629858	ES,A5SS,	0.079	n/a
10:74468041|74475660	74475520:74475660	A3SS,	0.078	n/a
1:94360170|94367225	94362227:94362376	A5SS,	0.077	n/a
15:49528048|49584734	49574184:49574282	ES,	0.077	n/a
3:48960181|48965246	48962151:48962272	ES,	0.077	n/a
4:148860976|148887990	148860976:148861010	A5SS,	0.077	n/a
7:74119496|74133260	74129443:74129486	ES,	0.077	n/a
16:89484692|89497734	89497660:89497734	A5SS,	0.074	n/a
9:102677460|102691125	102678392:102678450	ES,A3SS,	0.074	n/a
12:70671912|70704797	70687851:70687941	ES,	0.072	n/a
1:42730786|42776781	42744019:42744455	A3SS,	0.071	n/a
1:61798184|61824946	61813591:61813674	ES,	0.071	n/a
2:78225204|78252550	78226102:78226162	A3SS,	0.071	n/a
4:78694235|78697546	78695684:78695866	A3SS,	0.07	n/a
10:96201653|96234540	96211315:96211366	ES,	0.069	n/a
14:61482622|61512885	61497196:61497241	A3SS,	0.069	n/a
1:212502477|212506940	212502477:212502612	A5SS,	0.068	n/a
5:65284463|65310553	65292956:65293044	ES,	0.068	n/a
1:61743192|61824946	61813591:61813674	ES,	0.067	n/a
17:79027468|79031767	79030203:79030277	ES,	0.067	n/a
9:74810416|74817658	74812378:74812463	ES,	0.067	n/a
12:70671912|70704797	70679180:70679366	ES,	0.064	n/a
22:25771780|25777545	25771780:25771867	A3SS,	0.062	n/a
22:30032740|30038274	30032740:30032819	A5SS,	0.062	n/a
7:27668990|27689252	27671955:27672060	A3SS,	0.062	n/a
17:1746097|1747980	1747201:1747292	A3SS,	0.06	n/a
2:64083440|64085070	64084098:64084136	ES,	0.06	n/a
3:196842798|196846401	196842798:196842895	A3SS,	0.06	n/a
1:8601273|8617582	8611267:8611415	ES,	0.059	n/a
1:225195115|225284941	225275728:225275831	ES,	0.059	n/a
2:72945232|72958374	72948162:72948293	ES,	0.059	n/a
7:24663282|24681487	24665299:24665355	ES,	0.059	n/a
8:48196617|48206619	48200662:48200711	ES,	0.059	n/a
2:61749746|61753656	61752177:61752238	ES,	0.058	n/a
17:4186093|4210418	4200012:4200104	ES,A3SS,	0.057	n/a
22:46125305|46136418	46132848:46132963	ES,	0.057	n/a
4:88005272|88012981	88010697:88010842	ES,A3SS,	0.057	n/a
12:28458582|28544344	28458582:28458712	A5SS,	0.056	n/a
17:80842021|80858607	80847544:80847625	A5SS,	0.056	n/a
14:71880665|71996087	71950459:71950599	ES,	0.055	n/a
20:21346059|21349228	21346215:21346342	A3SS,	0.054	n/a
5:38991051|39021238	39002672:39002768	A5SS,	0.054	n/a
7:158580695|158591763	158586341:158586409	A3SS,	0.054	n/a
15:25650608|25660989	25653767:25653831	ES,	0.053	n/a
15:80412670|80415142	80412670:80412816	A5SS,	0.053	n/a
3:51575605|51624575	51606841:51606931	ES,	0.053	n/a
5:107521818|107684231	107679667:107679727	ES,	0.053	n/a
7:44465499|44467302	44465927:44466022	ES,	0.053	n/a
3:138289160|138291826	138289876:138289976	A3SS,	0.052	n/a
3:142455221|142467302	142467121:142467302	A3SS,	0.052	n/a
16:69404386|69406258	69404386:69404647	A3SS,	0.051	n/a
9:137582758|137593179	137583646:137583674	ES,	0.051	n/a
1:41578955|41582682	41578955:41579225	A3SS,	0.05	n/a
2:72945232|72948293	72947189:72947257	ES,	0.05	n/a
7:74119496|74133260	74133180:74133260	A3SS,	0.05	n/a
17:59853762|59857762	59857392:59857762	A5SS,	0.049	n/a
2:234296903|234299129	234298541:234298687	ES,A3SS,	0.049	n/a
4:148860976|148876525	148860976:148861010	A5SS,	0.049	n/a
5:38991051|39021238	38991051:38991145	A3SS,	0.049	n/a
1:21415631|21437876	21423682:21423819	ES,	0.048	n/a
4:36212012|36216102	36214018:36214076	A3SS,	0.048	n/a
5:619105|620376	620251:620376	A3SS,	0.048	n/a
6:158994452|159010814	159008793:159008849	ES,	0.048	n/a
7:27668990|27689252	27671955:27672045	A3SS,	0.047	n/a
1:247318868|247323115	247320302:247320423	ES,A3SS,	0.045	n/a
14:103470265|103478525	103478439:103478525	A5SS,	0.045	n/a
5:167915607|167921655	167921594:167921655	A3SS,	0.045	n/a
7:158580695|158591763	158581036:158581100	A3SS,	0.044	n/a
11:86778736|86802437	86795451:86795512	ES,	0.043	n/a
14:61275043|61285565	61276179:61276218	ES,	0.043	n/a
15:75215989|75219228	75215989:75216066	A3SS,	0.043	n/a
16:15973661|15978062	15976806:15976905	ES,	0.043	n/a
5:38523521|38530768	38527338:38527396	A5SS,	0.043	n/a
5:38523521|38530768	38523521:38523672	A3SS,	0.043	n/a
9:96233423|96238620	96236515:96236612	ES,	0.043	n/a
15:25650608|25657118	25652214:25652284	ES,A3SS,	0.042	n/a
17:29483001|29497015	29491067:29491097	ES,	0.042	n/a
21:38792601|38845182	38801169:38801210	ES,	0.042	n/a
17:28934570|28937960	28937912:28937960	A3SS,	0.041	n/a
21:16386665|16415895	16412684:16412737	ES,	0.041	n/a
8:15508206|15531345	15525939:15526060	ES,	0.041	n/a
2:53628798|53642744	53633138:53633232	ES,	0.04	n/a
20:30954187|30978970	30959589:30959677	ES,	0.04	n/a
13:96637493|96648389	96638587:96638671	A3SS,	0.038	n/a
17:1746097|1756483	1748944:1748992	ES,	0.037	n/a
X:17491184|17495443	17492067:17492148	ES,	0.037	n/a
1:92798948|92846430	92798948:92799018	A5SS,	0.036	n/a
7:56049903|56051561	56051442:56051561	A3SS,	0.036	n/a
11:46098305|46113774	46112006:46112132	ES,A3SS,	0.035	n/a
17:36517594|36533668	36520635:36520739	ES,	0.034	n/a
3:47762156|47787483	47762919:47762986	ES,	0.034	n/a
4:148860976|148887990	148887853:148887990	A3SS,	0.034	n/a
2:61749746|61753656	61752627:61752694	ES,	0.032	n/a
3:195101738|195133645	195132485:195132580	ES,	0.032	n/a
8:6335115|6357450	6351645:6351766	ES,	0.032	n/a
14:71880665|71996087	71964571:71964606	ES,	0.03	n/a
12:11181000|11199787	11181000:11181131	A3SS,	0.029	n/a
2:58311224|58316858	58315482:58315581	A3SS,	0.029	n/a
2:58449077|58459247	58449077:58449173	A3SS,	0.029	n/a
2:62974530|62998527	62986114:62986178	ES,	0.029	n/a
6:159004986|159010814	159010680:159010814	A3SS,	0.029	n/a
2:169018297|169023917	169023586:169023674	ES,	0.028	n/a
11:61133517|61135470	61134900:61134997	ES,A5SS,	0.027	n/a
2:72945232|72960247	72948162:72948293	ES,	0.026	n/a
17:80992911|81006661	80995529:80995643	ES,	0.025	n/a
12:28458582|28460682	28458582:28458712	A5SS,	0.024	n/a
7:27668990|27689252	27676295:27676356	ES,	0.024	n/a
8:141874411|141900868	141884562:141884629	ES,	0.024	n/a
9:138773479|138774924	138774061:138774222	ES,	0.024	n/a
1:246600450|246603426	246600450:246600487	A3SS,	0.023	n/a
22:30032740|30038274	30035202:30035320	ES,	0.023	n/a
15:43120126|43132631	43122356:43122557	ES,	0.022	n/a
1:247320302|247323115	247320302:247320509	A3SS,	0.021	n/a
2:240929491|240946787	240942466:240942557	ES,A3SS,	0.021	n/a
2:240929491|240946787	240944623:240944712	A5SS,	0.021	n/a
3:183097085|183107567	183102764:183102843	ES,	0.021	n/a
2:109463194|109473426	109467094:109467211	ES,	0.02	n/a
17:80842021|80861354	80858472:80858607	ES,A3SS,	0.019	n/a
10:96201653|96234540	96203085:96203180	ES,	0.018	n/a
7:33185854|33217203	33192313:33192467	A5SS,	0.018	n/a
10:86177527|86198463	86198038:86198133	ES,	0.016	n/a
12:116668338|116675510	116671857:116671892	ES,	0.016	n/a
3:149563798|149639014	149638939:149639014	A3SS,	0.016	n/a
9:74838036|74846097	74842863:74842956	A3SS,	0.016	n/a
9:74838036|74846097	74840593:74840704	A5SS,	0.016	n/a
15:89656956|89659752	89656956:89657046	A5SS,	0.015	n/a
17:79937060|79943483	79939113:79939176	ES,	0.015	n/a
3:196118684|196129890	196120421:196120490	A5SS,	0.013	n/a
15:43120126|43132631	43132056:43132196	ES,	0.012	n/a
2:61749746|61761038	61756201:61756294	ES,	0.012	n/a
3:196118684|196129890	196127500:196127603	ES,	0.012	n/a
13:33091994|33101669	33100676:33100725	ES,	0.011	n/a
2:72945232|72960247	72947189:72947257	ES,	0.011	n/a
5:32135678|32143986	32139658:32139818	ES,	0.011	n/a
9:98740343|98766983	98759528:98759695	ES,	0.011	n/a
17:1746097|1756483	1748268:1748360	ES,	0.009	n/a
1:92798948|92846430	92829266:92829327	ES,	0.008	n/a
14:81362062|81372425	81372304:81372425	A5SS,	0.008	n/a
3:196831774|196846401	196831774:196831870	A3SS,	0.008	n/a
22:46085592|46114373	46108999:46109071	ES,	0.005	n/a
3:157839892|157841780	157841661:157841780	A3SS,	0.005	n/a
12:46622936|46637097	46623347:46623418	A3SS,	0.004	n/a
2:72945232|72960247	72958284:72958411	ES,A3SS,	0.004	n/a
20:30954187|30959677	30959589:30959677	A3SS,	0.004	n/a
5:619105|620376	620193:620376	A3SS,	0.004	n/a
10:7318854|7327916	7325866:7326112	A3SS,	0.003	n/a
5:137320946|137324004	137323959:137324004	A5SS,	0.002	n/a

## Sheet: SRR5889368_SW480_rep1
circRNA_id	alternatively_spliced_exon	AS_type	psi_estimation_without_correction	psi_estimation_after_correction
1:146757975|146759412	146757975:146758177	A5SS,	1	n/a
1:247318868|247323115	247318868:247318997	A3SS,	1	n/a
11:17899755|18031686	18031618:18031686	A5SS,	1	n/a
11:18010144|18029623	18010144:18010302	A3SS,	1	n/a
11:34097783|34098189	34097783:34098021	A5SS,	1	n/a
11:46098305|46113774	46098305:46098370	A3SS,	1	n/a
11:65198240|65205128	65198240:65198273	A5SS,	1	n/a
11:108057209|108061227	108059833:108060057	A3SS,	1	n/a
11:120343759|120348235	120343759:120343836	A5SS,	1	n/a
13:52992127|53001354	53001124:53001201	ES,	1	n/a
13:113170754|113181798	113174200:113174335	A3SS,	1	n/a
14:51489553|51492078	51489553:51489675	A3SS,	1	n/a
16:72557231|72604414	72604350:72604414	A5SS,	1	n/a
16:89824985|89828430	89824985:89825113	A3SS,	1	n/a
17:53108529|53124515	53120973:53121031	ES,	1	n/a
17:60061532|60062451	60061532:60061728	A3SS,	1	n/a
17:62632596|62641679	62632596:62632717	A3SS,	1	n/a
19:1417499|1422395	1418665:1418730	A3SS,	1	n/a
19:19756683|19757156	19756683:19756794	A3SS,	1	n/a
2:44729828|44732869	44732772:44732869	A3SS,	1	n/a
2:98504515|98543950	98541809:98541928	A3SS,	1	n/a
2:98525121|98543950	98541809:98541928	A3SS,	1	n/a
3:11850991|11852371	11850991:11851156	A3SS,	1	n/a
3:33106955|33114205	33109722:33109782	A3SS,	1	n/a
3:33109722|33110462	33109722:33109782	A3SS,	1	n/a
3:33109722|33114205	33109722:33109782	A3SS,	1	n/a
3:196807922|196846401	196812451:196812627	ES,	1	n/a
3:196831774|196857542	196857398:196857542	A5SS,	1	n/a
5:93294482|93300228	93294482:93294673	A3SS,	1	n/a
5:111594926|111602027	111595588:111595676	A3SS,	1	n/a
5:111595588|111602027	111595588:111595676	A3SS,	1	n/a
5:111595588|111616020	111595588:111595676	A3SS,	1	n/a
5:130883740|130940386	130883740:130883883	A3SS,	1	n/a
6:87920169|87928449	87920169:87920316	A5SS,	1	n/a
7:16722405|16729531	16725530:16725665	A3SS,	1	n/a
7:26724355|26729981	26724355:26724467	A3SS,	1	n/a
8:18656805|18662408	18658780:18658892	A3SS,	1	n/a
9:33948372|33956144	33956077:33956144	A5SS,	1	n/a
9:33948372|33956144	33953283:33953472	A3SS,	1	n/a
9:33960824|33973235	33971649:33971752	A3SS,	1	n/a
X:47705504|47755339	47747398:47747524	A5SS,	1	n/a
5:137320946|137324004	137323150:137323305	ES,	0.994	n/a
20:7976673|7990962	7980379:7980507	A5SS,	0.993	n/a
12:46622936|46637097	46623347:46623422	A5SS,	0.985	n/a
17:44159807|44172067	44159807:44159908	A3SS,	0.983	n/a
3:196817783|196846401	196817783:196817897	A3SS,	0.981	n/a
8:80182258|80201046	80198025:80198212	A3SS,	0.981	n/a
18:13681604|13682104	13681604:13682104	IR,	0.977	n/a
13:61013822|61034674	61018817:61018882	A3SS,	0.976	n/a
X:71681854|71684581	71681854:71681948	A3SS,	0.976	n/a
8:131370263|131374017	131373916:131374017	A5SS,	0.971	n/a
3:57875768|57882659	57881974:57882098	ES,	0.968	n/a
7:43679048|43680248	43680172:43680248	A5SS,	0.967	n/a
9:33953283|33973235	33971649:33971752	A3SS,	0.966	n/a
5:176370336|176385155	176378475:176378578	A5SS,	0.962	n/a
5:176370336|176385155	176370336:176370489	A3SS,	0.962	n/a
2:234296903|234299129	234298575:234298687	ES,	0.96	n/a
9:95030456|95032265	95032167:95032265	A5SS,	0.958	n/a
3:196807922|196846401	196842798:196842954	A3SS,	0.955	n/a
7:99621042|99621930	99621042:99621555	IR,	0.955	n/a
17:80842021|80861354	80858527:80858607	ES,	0.954	n/a
11:46515158|46534363	46534277:46534363	A5SS,	0.953	n/a
2:61749746|61753656	61752405:61752468	ES,	0.953	n/a
11:128993341|129034322	128993783:128993824	ES,	0.949	n/a
17:80842021|80861354	80851423:80851508	ES,	0.947	n/a
3:196831774|196846401	196842798:196842954	A3SS,	0.941	n/a
1:9991949|9994918	9994820:9994918	A5SS,	0.94	n/a
16:47531310|47549512	47536902:47537001	ES,	0.94	n/a
17:80828100|80858607	80851423:80851508	ES,	0.939	n/a
1:247320302|247323115	247320302:247320519	A3SS,	0.938	n/a
3:41746549|41759353	41746746:41746797	A3SS,	0.938	n/a
X:106331666|106332069	106331666:106332069	IR,	0.937	n/a
3:196817783|196846401	196842798:196842954	A5SS,	0.935	n/a
13:61013822|61041513	61018817:61018882	A3SS,	0.929	n/a
10:99915850|99923154	99917220:99917330	ES,	0.927	n/a
19:5047487|5082515	5071021:5071070	ES,	0.926	n/a
2:24787164|24866991	24807345:24807429	ES,	0.926	n/a
9:131882792|131885417	131882792:131882889	A5SS,	0.926	n/a
12:70193989|70195501	70193989:70194117	A5SS,	0.923	n/a
5:109049221|109051965	109051821:109051965	A3SS,	0.923	n/a
6:47471016|47472494	47471731:47471790	ES,	0.922	n/a
17:80828100|80858607	80842021:80842078	ES,	0.92	n/a
21:38792601|38802702	38794076:38794168	ES,	0.919	n/a
17:80842021|80861354	80847544:80847573	ES,	0.918	n/a
11:78176922|78204241	78189484:78189521	ES,	0.917	n/a
17:1746097|1747980	1747214:1747292	A5SS,	0.917	n/a
17:80828100|80858607	80847544:80847573	ES,	0.913	n/a
2:24357989|24369956	24362240:24362320	ES,	0.909	n/a
2:10784446|10808849	10794607:10794673	ES,	0.908	n/a
11:46098305|46113774	46112006:46112117	A3SS,	0.905	n/a
2:135010666|135028121	135010666:135010789	A5SS,	0.905	n/a
3:196842798|196846401	196842798:196842954	A3SS,	0.905	n/a
3:41746549|41759353	41756729:41756785	ES,	0.9	n/a
5:32268807|32276848	32270923:32271053	A5SS,	0.9	n/a
3:11399892|11468400	11421446:11421526	ES,	0.898	n/a
6:87925621|87928449	87925621:87925775	A5SS,	0.897	n/a
3:138289160|138291774	138289876:138289999	A3SS,	0.896	n/a
3:52946554|52950230	52946554:52946663	A3SS,	0.895	n/a
9:115024715|115060196	115060112:115060196	A5SS,	0.895	n/a
12:116668338|116675510	116674626:116674695	ES,	0.89	n/a
13:22088492|22113827	22113441:22113516	ES,	0.889	n/a
20:50290692|50307358	50305603:50305678	ES,	0.881	n/a
8:141874411|141900868	141889570:141889736	ES,	0.878	n/a
16:89961446|89967202	89965175:89965295	A5SS,	0.875	n/a
3:141231005|141259451	141235170:141235273	A5SS,	0.875	n/a
3:141231005|141259451	141248550:141248644	A3SS,	0.875	n/a
5:76745585|76760634	76745585:76745695	A3SS,	0.872	n/a
6:42941741|42942776	42941741:42941824	A3SS,	0.871	n/a
13:114806476|114839312	114806476:114806570	A3SS,	0.868	n/a
3:57569625|57570191	57569625:57569759	A3SS,	0.867	n/a
7:2269619|2270362	2270184:2270362	A5SS,	0.861	n/a
16:31733947|31734674	31734579:31734674	A3SS,	0.86	n/a
1:155783425|155784240	155783425:155783595	A3SS,	0.857	n/a
11:78176922|78204241	78189631:78189729	ES,	0.857	n/a
12:65720606|65762806	65753285:65753482	A5SS,	0.857	n/a
16:85810161|85814886	85814817:85814886	A5SS,	0.857	n/a
19:2936522|2939405	2939279:2939405	A5SS,	0.857	n/a
19:3660964|3661999	3661371:3661524	ES,	0.852	n/a
9:114148657|114154104	114152264:114152381	A3SS,	0.85	n/a
7:16720926|16729531	16725530:16725665	A3SS,	0.846	n/a
14:71880665|71996087	71979460:71979562	ES,	0.844	n/a
17:57808782|57816308	57814814:57814904	ES,	0.842	n/a
7:152007051|152012423	152008883:152009031	A5SS,	0.842	n/a
16:87782279|87795646	87790005:87790083	A5SS,	0.833	n/a
20:25614685|25626284	25615365:25615463	ES,	0.833	n/a
6:42559889|42562042	42560599:42560730	ES,	0.833	n/a
21:38792601|38802702	38797992:38798083	ES,	0.825	n/a
5:76745585|76760634	76747116:76747178	ES,	0.824	n/a
7:27668990|27689252	27671955:27672064	A3SS,	0.824	n/a
3:197592294|197602646	197592983:197593090	ES,	0.821	n/a
2:99786013|99787892	99787806:99787892	A5SS,	0.818	n/a
7:156516806|156556489	156518129:156518219	ES,	0.818	n/a
8:42716888|42729149	42719756:42719836	A5SS,	0.818	n/a
8:42761316|42785315	42783869:42783953	ES,	0.814	n/a
17:42231924|42232779	42232117:42232306	A3SS,	0.812	n/a
7:156758964|156759786	156759655:156759786	A3SS,	0.812	n/a
7:156758964|156759786	156758964:156759096	A5SS,	0.812	n/a
14:102506573|102507010	102506573:102506747	A5SS,	0.811	n/a
11:1000432|1003804	1000432:1000598	A5SS,	0.81	n/a
3:196817783|196846401	196831774:196831876	ES,	0.807	n/a
21:16386665|16415895	16387466:16387546	ES,	0.806	n/a
15:28389019|28391490	28389223:28389281	A3SS,	0.8	n/a
18:12698978|12701112	12698978:12699164	A3SS,	0.8	n/a
2:10784446|10808849	10797868:10798017	ES,	0.8	n/a
1:94360170|94367225	94362174:94362376	A5SS,	0.794	n/a
2:61710092|61717911	61715723:61715906	ES,	0.785	n/a
17:80858527|80869665	80861281:80861354	ES,	0.778	n/a
16:72651082|72651452	72651233:72651452	A5SS,	0.769	n/a
16:72651082|72651452	72651082:72651136	A3SS,	0.769	n/a
19:5047487|5082515	5077378:5077459	A5SS,	0.769	n/a
3:180651122|180653019	180652515:180652586	ES,	0.769	n/a
21:37775056|37783902	37781672:37781763	A5SS,	0.765	n/a
5:122881111|122893258	122893189:122893258	A3SS,	0.765	n/a
17:36517594|36533668	36523765:36523933	ES,	0.762	n/a
11:85685751|85695016	85692915:85693031	A3SS,	0.759	n/a
10:124151819|124152857	124151819:124151884	A5SS,	0.75	n/a
12:76844631|76881398	76844631:76844768	A3SS,	0.75	n/a
13:99157169|99171727	99157169:99157227	A3SS,	0.75	n/a
15:25654235|25660989	25660862:25660989	A5SS,	0.75	n/a
16:88008654|88017865	88008654:88008791	A5SS,	0.75	n/a
2:85595809|85598685	85596862:85596953	ES,	0.75	n/a
3:138289160|138290198	138289160:138289340	A3SS,	0.75	n/a
8:27382879|27394372	27382879:27382990	A5SS,	0.75	n/a
8:27382879|27394372	27394301:27394372	A3SS,	0.75	n/a
9:125042722|125054119	125048318:125048445	ES,	0.747	n/a
13:31789188|31803431	31797871:31797963	ES,	0.746	n/a
11:117023157|117034608	117031861:117031977	ES,	0.743	n/a
9:33971649|33973235	33971649:33971752	A3SS,	0.741	n/a
20:52773708|52788209	52773927:52774124	ES,	0.738	n/a
1:51868107|51874004	51871577:51871780	ES,	0.737	n/a
8:25265499|25266456	25265499:25265634	A5SS,	0.733	n/a
9:20819795|20823114	20820940:20821070	A5SS,	0.729	n/a
2:9419446|9437574	9427133:9427241	ES,	0.724	n/a
15:64410316|64415745	64410987:64411053	A3SS,	0.714	n/a
16:85810161|85814886	85813985:85814079	A3SS,	0.714	n/a
11:18568427|18588029	18587931:18588029	A5SS,	0.7	n/a
11:128963516|128994789	128994183:128994355	ES,A3SS,	0.7	n/a
20:31973456|31980048	31979948:31980048	A5SS,	0.7	n/a
10:5751493|5756170	5754357:5754502	ES,	0.692	n/a
5:96058343|96066564	96064857:96064913	ES,	0.692	n/a
3:52946554|52950230	52947506:52947633	A5SS,	0.684	n/a
14:76633006|76662315	76647107:76647192	ES,	0.682	n/a
1:231090079|231097049	231092167:231092306	ES,A3SS,	0.679	n/a
1:217783663|217787544	217784279:217784413	A5SS,	0.667	n/a
12:109210814|109217137	109212212:109212334	A5SS,	0.667	n/a
12:109212025|109212334	109212212:109212334	A5SS,	0.667	n/a
18:13037236|13040955	13038369:13038578	A3SS,	0.667	n/a
2:169018297|169023917	169021781:169021806	ES,	0.667	n/a
22:40948110|40990739	40982037:40982116	ES,	0.667	n/a
5:122881111|122893258	122888801:122888841	ES,	0.667	n/a
5:122881111|122893258	122881111:122881341	A5SS,	0.667	n/a
8:42716888|42720632	42719760:42719836	A5SS,	0.667	n/a
X:24190832|24197887	24193506:24193560	ES,	0.667	n/a
17:80842021|80869665	80861281:80861354	ES,	0.657	n/a
1:51926763|51930998	51929679:51929736	ES,	0.649	n/a
16:21350242|21363459	21353829:21353907	ES,	0.647	n/a
5:179688684|179707608	179691781:179691839	ES,	0.641	n/a
8:129001408|129022690	129021836:129021964	A3SS,	0.64	n/a
1:8601273|8674745	8616534:8616630	A3SS,	0.636	n/a
17:34147028|34147441	34147168:34147252	A5SS,	0.636	n/a
2:240078348|240085619	240085505:240085619	A5SS,	0.632	n/a
13:114174931|114193822	114188451:114188555	A3SS,	0.625	n/a
17:80842021|80869665	80847544:80847573	ES,	0.623	n/a
7:77407655|77408131	77407847:77408131	A3SS,	0.622	n/a
1:108724563|108728576	108727765:108727892	ES,A5SS,	0.615	n/a
11:128993341|128997200	128993783:128993824	ES,	0.615	n/a
1:23356962|23377013	23370920:23370979	ES,	0.609	n/a
20:33065577|33067594	33067500:33067594	A3SS,	0.609	n/a
13:60667762|60686320	60676927:60677048	ES,	0.6	n/a
15:50592986|50593565	50593454:50593565	A5SS,	0.6	n/a
17:66205795|66206606	66205795:66205904	A5SS,	0.6	n/a
22:50810449|50832564	50827415:50827540	ES,	0.6	n/a
3:183465460|183470041	183469861:183470041	A3SS,	0.6	n/a
3:183465460|183470041	183465460:183465504	A5SS,	0.6	n/a
6:86267694|86284096	86275050:86275137	ES,	0.6	n/a
6:158688266|158703410	158688266:158688447	A5SS,	0.6	n/a
7:130737184|130761346	130741012:130741075	ES,	0.6	n/a
9:115024715|115060196	115038124:115038293	ES,	0.6	n/a
17:1540003|1540356	1540003:1540356	IR,	0.593	n/a
17:80842021|80869665	80858527:80858607	ES,	0.591	n/a
15:25650608|25657118	25653767:25653831	ES,	0.588	n/a
9:33953283|33963789	33956077:33956144	ES,	0.588	n/a
22:25771780|25777545	25771780:25771975	A3SS,	0.583	n/a
12:116668338|116675510	116669864:116669961	ES,A5SS,	0.579	n/a
19:17387304|17387718	17387304:17387718	IR,	0.579	n/a
X:71681854|71684581	71682212:71682292	ES,	0.577	n/a
17:28808161|28811788	28808161:28808275	A5SS,	0.571	n/a
3:197592294|197598333	197592983:197593090	ES,	0.571	n/a
5:79498705|79501179	79501026:79501179	A5SS,	0.565	n/a
5:138614016|138614818	138614254:138614429	ES,	0.564	n/a
17:47388674|47390207	47390064:47390207	A5SS,	0.562	n/a
1:28907072|28907741	28907606:28907741	A5SS,	0.556	n/a
2:232952197|232952750	232952714:232952750	A3SS,	0.556	n/a
15:80412670|80415142	80414090:80414149	A3SS,	0.55	n/a
7:64004085|64004810	64004684:64004810	A5SS,	0.548	n/a
17:80842021|80869665	80851423:80851508	ES,	0.543	n/a
2:128870658|128873917	128872698:128872794	ES,	0.538	n/a
8:48196617|48206619	48203622:48203801	A5SS,	0.538	n/a
9:33956856|33963789	33956856:33957079	A3SS,	0.538	n/a
16:27222467|27226329	27222467:27222538	A5SS,	0.536	n/a
20:30954187|30989835	30959581:30959677	ES,	0.532	n/a
11:62549366|62550297	62549928:62549991	ES,	0.529	n/a
3:142455221|142467302	142462334:142462428	ES,A3SS,	0.529	n/a
12:109212025|109217137	109212212:109212334	A5SS,	0.519	n/a
1:155891166|155891709	155891166:155891318	A3SS,	0.5	n/a
1:155891166|155891709	155891166:155891419	A3SS,	0.5	n/a
13:33091994|33101669	33101545:33101669	A5SS,	0.5	n/a
13:33091994|33101669	33101595:33101669	A5SS,	0.5	n/a
14:71880665|71884913	71884801:71884913	A3SS,	0.5	n/a
14:71880665|71884913	71884847:71884913	A3SS,	0.5	n/a
17:53478830|53481229	53479527:53479664	A5SS,	0.5	n/a
17:53478830|53481229	53479575:53479664	A5SS,	0.5	n/a
18:76953183|76974038	76964748:76964874	ES,	0.5	n/a
2:70451686|70457986	70452460:70452525	ES,	0.5	n/a
20:60831113|60847315	60835073:60835181	A3SS,	0.5	n/a
20:60831113|60847315	60835037:60835181	A3SS,	0.5	n/a
21:38792601|38845182	38802571:38802702	ES,	0.5	n/a
22:30374431|30394846	30384469:30384551	ES,	0.5	n/a
3:128514203|128516912	128515988:128516061	ES,	0.5	n/a
4:54292039|54294350	54294194:54294350	A3SS,	0.5	n/a
4:54292039|54294350	54294264:54294350	A3SS,	0.5	n/a
5:109049221|109065214	109051861:109051965	A3SS,	0.5	n/a
5:109049221|109065214	109051821:109051965	A3SS,	0.5	n/a
7:550446|557127	557031:557127	A5SS,	0.5	n/a
7:550446|557127	557035:557127	A5SS,	0.5	n/a
8:80182258|80201046	80194314:80194367	ES,	0.497	n/a
2:207144264|207162097	207156738:207156840	ES,	0.492	n/a
12:109212025|109217137	109212208:109212334	A5SS,	0.481	n/a
2:98525121|98543950	98528084:98528134	ES,	0.467	n/a
16:27222467|27226329	27222467:27222542	A5SS,	0.464	n/a
8:48196617|48206619	48203622:48203726	A5SS,	0.462	n/a
9:33956856|33963789	33956856:33956923	A3SS,	0.462	n/a
20:10536879|10541468	10541089:10541139	ES,	0.461	n/a
3:80680382|80683122	80680887:80681005	ES,	0.457	n/a
1:197621365|197684204	197627430:197627499	ES,	0.455	n/a
11:117023157|117034608	117030650:117030739	ES,	0.455	n/a
9:134381501|134381840	134381501:134381840	IR,	0.455	n/a
7:64004085|64004810	64004642:64004810	A5SS,	0.452	n/a
15:80412670|80415142	80414054:80414149	A3SS,	0.45	n/a
1:28907072|28907741	28907623:28907741	A5SS,	0.444	n/a
2:232952197|232952750	232952670:232952750	A3SS,	0.444	n/a
13:99573208|99575625	99574695:99574763	ES,	0.44	n/a
2:44436349|44445676	44440835:44440896	ES,	0.44	n/a
12:116534474|116549317	116547579:116547674	ES,	0.439	n/a
17:47388674|47390207	47390060:47390207	A5SS,	0.438	n/a
12:109046048|109048186	109046814:109046957	ES,	0.435	n/a
15:72300167|72320134	72311380:72311436	ES,	0.435	n/a
2:36623757|36669878	36668401:36668643	ES,	0.435	n/a
5:79498705|79501179	79501045:79501179	A5SS,	0.435	n/a
17:28808161|28811788	28808161:28808281	A5SS,	0.429	n/a
17:79027468|79031767	79030203:79030277	ES,	0.429	n/a
21:38792601|38845182	38794076:38794168	ES,	0.429	n/a
1:231081135|231097049	231092167:231092228	ES,A3SS,	0.417	n/a
22:25771780|25777545	25771780:25771867	A3SS,	0.417	n/a
12:116668238|116675510	116674626:116674695	ES,	0.411	n/a
21:40600426|40601362	40601040:40601145	ES,	0.404	n/a
12:72163580|72167802	72165885:72166008	ES,	0.4	n/a
15:50592986|50593565	50593418:50593565	A5SS,	0.4	n/a
17:66205795|66206606	66205795:66205997	A5SS,	0.4	n/a
2:10784446|10808849	10799298:10799376	ES,	0.4	n/a
3:183465460|183470041	183469865:183470041	A3SS,	0.4	n/a
3:183465460|183470041	183465460:183465508	A5SS,	0.4	n/a
6:158688266|158703410	158688266:158688453	A5SS,	0.4	n/a
20:33065577|33067594	33067435:33067594	A3SS,	0.391	n/a
8:80182258|80204573	80200940:80201046	ES,	0.385	n/a
8:141749117|141762415	141754751:141754866	ES,	0.385	n/a
6:159026299|159029782	159028276:159028375	ES,	0.381	n/a
7:77407655|77408131	77407951:77408131	A3SS,	0.378	n/a
1:8555123|8674745	8672105:8672160	ES,	0.375	n/a
13:114174931|114193822	114188360:114188555	A3SS,	0.375	n/a
2:240078348|240085619	240085499:240085619	A5SS,	0.368	n/a
1:8601273|8674745	8616534:8616618	A3SS,	0.364	n/a
17:34147028|34147441	34147168:34147243	A5SS,	0.364	n/a
8:37623044|37623873	37623044:37623264	IR,	0.364	n/a
15:90414707|90432372	90421497:90421532	ES,	0.36	n/a
19:34685383|34706566	34706029:34706205	ES,	0.36	n/a
8:129001408|129022690	129021899:129021964	A3SS,	0.36	n/a
3:3819409|3830758	3824187:3824332	ES,	0.355	n/a
19:4941540|4941943	4941540:4941943	IR,	0.354	n/a
2:128855003|128861588	128860653:128860719	ES,	0.353	n/a
3:142455221|142467302	142462327:142462428	ES,A3SS,	0.353	n/a
7:74119496|74131270	74129177:74129236	ES,	0.346	n/a
1:47761437|47767420	47765577:47765640	ES,	0.333	n/a
1:155686797|155695810	155691308:155691409	ES,	0.333	n/a
1:217783663|217787544	217784231:217784413	A5SS,	0.333	n/a
11:19848422|19864469	19852623:19852715	ES,	0.333	n/a
11:32610140|32611187	32610558:32610681	ES,	0.333	n/a
12:109210814|109217137	109212208:109212334	A5SS,	0.333	n/a
12:109212025|109212334	109212208:109212334	A5SS,	0.333	n/a
14:71880665|71996087	71995416:71995457	ES,	0.333	n/a
15:38591574|38617010	38613978:38614073	ES,	0.333	n/a
17:42512433|42541912	42516039:42516083	ES,	0.333	n/a
18:13037236|13040955	13038514:13038578	A3SS,	0.333	n/a
2:240929491|240946787	240942466:240942553	ES,A3SS,	0.333	n/a
4:103446669|103488292	103455002:103455042	ES,	0.333	n/a
5:122881111|122893258	122881111:122881535	A5SS,	0.333	n/a
7:156516806|156549159	156520624:156520701	ES,	0.333	n/a
8:42716888|42720632	42719756:42719836	A5SS,	0.333	n/a
9:125042722|125054119	125048059:125048225	ES,	0.333	n/a
3:52946554|52950230	52947494:52947633	A5SS,	0.316	n/a
3:128356642|128363826	128359849:128359977	ES,	0.314	n/a
11:18568427|18588029	18587894:18588029	A5SS,	0.3	n/a
2:175779786|175816930	175805544:175805622	ES,	0.3	n/a
20:31973456|31980048	31979941:31980048	A5SS,	0.3	n/a
1:28116073|28120143	28119821:28119880	ES,	0.294	n/a
17:79571574|79575848	79573717:79573840	ES,	0.294	n/a
15:64410316|64415745	64410991:64411053	A3SS,	0.286	n/a
16:85810161|85814886	85813985:85814075	A3SS,	0.286	n/a
8:141856359|141900868	141889570:141889736	ES,	0.286	n/a
14:76633006|76647192	76644551:76644665	ES,	0.273	n/a
2:9028148|9098771	9083316:9083393	ES,	0.273	n/a
3:31917925|31921322	31920922:31921045	ES,	0.273	n/a
3:51575514|51624575	51606838:51606931	ES,	0.273	n/a
9:20819795|20823114	20820940:20821060	A5SS,	0.271	n/a
11:128993341|128994789	128994183:128994348	ES,A3SS,	0.267	n/a
8:25265499|25266456	25265499:25265670	A5SS,	0.267	n/a
2:64083440|64085070	64084684:64084852	ES,	0.265	n/a
2:240929491|240946787	240939600:240939804	ES,	0.265	n/a
9:33971649|33973235	33971649:33971735	A3SS,	0.259	n/a
1:231090079|231097049	231092167:231092228	ES,A3SS,	0.25	n/a
10:124151819|124152857	124151819:124151888	A5SS,	0.25	n/a
10:126727566|126799662	126776760:126776888	ES,	0.25	n/a
12:11181000|11199787	11187381:11187484	ES,	0.25	n/a
12:76844631|76881398	76844631:76844759	A3SS,	0.25	n/a
13:99157169|99171727	99157169:99157307	A3SS,	0.25	n/a
15:25654235|25660989	25660857:25660989	A5SS,	0.25	n/a
22:50810449|50832564	50830255:50830444	ES,A3SS,	0.25	n/a
3:119219542|119222868	119222379:119222467	ES,	0.25	n/a
3:138289160|138290198	138289160:138289368	A3SS,	0.25	n/a
8:27382879|27394372	27382879:27382994	A5SS,	0.25	n/a
8:27382879|27394372	27394305:27394372	A3SS,	0.25	n/a
20:30954187|30978970	30959581:30959677	ES,	0.247	n/a
14:62188227|62188541	62188227:62188541	IR,	0.244	n/a
11:85685751|85695016	85692915:85693046	A3SS,	0.241	n/a
7:64004085|64004810	64004455:64004579	ES,	0.239	n/a
22:30050646|30054253	30050964:30051069	ES,	0.238	n/a
5:132219032|132220811	132219811:132219880	ES,	0.238	n/a
21:37775056|37783902	37781672:37781856	A5SS,	0.235	n/a
5:122881111|122893258	122893216:122893258	A3SS,	0.235	n/a
9:22046750|22064017	22061952:22062025	ES,	0.234	n/a
11:128993341|128994789	128994183:128994355	ES,A3SS,	0.233	n/a
1:108724563|108728576	108727838:108727892	ES,A5SS,	0.231	n/a
16:72651082|72651452	72651238:72651452	A5SS,	0.231	n/a
16:72651082|72651452	72651082:72651133	A3SS,	0.231	n/a
19:5047487|5082515	5077378:5077481	A5SS,	0.231	n/a
5:77452082|77461496	77459003:77459148	ES,	0.231	n/a
9:102677460|102691125	102684484:102684577	ES,	0.231	n/a
X:14868627|14877456	14870490:14870599	ES,	0.231	n/a
11:128993341|128997200	128994183:128994355	ES,	0.226	n/a
13:45725822|45781640	45757536:45757613	ES,	0.226	n/a
16:29917109|29917448	29917109:29917448	IR,	0.223	n/a
9:102677460|102691125	102678331:102678450	ES,A3SS,	0.222	n/a
2:61749746|61761038	61752405:61752468	ES,	0.221	n/a
1:94360170|94367225	94362227:94362376	A5SS,	0.206	n/a
12:116668238|116675510	116669864:116669961	ES,	0.206	n/a
2:44931422|44942492	44932457:44932676	ES,	0.206	n/a
2:225400245|225422573	225421012:225421137	ES,A3SS,	0.206	n/a
15:28389019|28391490	28389223:28389381	A3SS,	0.2	n/a
18:12698978|12701112	12698978:12699202	A3SS,	0.2	n/a
3:130649260|130660543	130656272:130656307	ES,	0.2	n/a
7:107167682|107188777	107170231:107170308	ES,	0.2	n/a
11:1000432|1003804	1000432:1000684	A5SS,	0.19	n/a
14:102506573|102507010	102506573:102506776	A5SS,	0.189	n/a
17:42231924|42232779	42232221:42232306	A3SS,	0.188	n/a
7:156758964|156759786	156759652:156759786	A3SS,	0.188	n/a
7:156758964|156759786	156758964:156759071	A5SS,	0.188	n/a
12:116674626|116675510	116674962:116675078	ES,	0.184	n/a
17:79577236|79580520	79580076:79580151	ES,	0.182	n/a
2:99786013|99787892	99787802:99787892	A5SS,	0.182	n/a
3:50137415|50142575	50141681:50141741	ES,	0.182	n/a
8:42716888|42729149	42719760:42719836	A5SS,	0.182	n/a
2:225400245|225422573	225421012:225421106	ES,A3SS,	0.176	n/a
7:27668990|27689252	27671955:27672045	A3SS,	0.176	n/a
X:24190832|24197887	24191724:24191840	ES,	0.176	n/a
17:49340635|49346265	49345571:49345689	ES,	0.17	n/a
1:231081135|231097049	231092167:231092306	ES,A3SS,	0.167	n/a
16:87782279|87795646	87790028:87790083	A5SS,	0.167	n/a
9:102677460|102691125	102678348:102678450	ES,A3SS,	0.167	n/a
15:25650608|25660989	25653767:25653831	ES,	0.165	n/a
13:31789188|31803431	31797578:31797650	ES,	0.164	n/a
11:128993341|129034322	128997107:128997200	ES,	0.16	n/a
7:102039995|102047945	102045309:102045369	ES,	0.16	n/a
7:152007051|152012423	152008998:152009031	A5SS,	0.158	n/a
7:16720926|16729531	16725549:16725665	A3SS,	0.154	n/a
9:114148657|114154104	114152264:114152377	A3SS,	0.15	n/a
2:240929491|240946787	240942466:240942557	ES,A3SS,	0.148	n/a
21:38792601|38802702	38799604:38799703	ES,	0.148	n/a
22:47370186|47393605	47374443:47374830	ES,	0.146	n/a
11:128993341|129034322	128994183:128994348	ES,A3SS,	0.145	n/a
1:155783425|155784240	155783425:155783612	A3SS,	0.143	n/a
10:96201653|96234540	96211315:96211366	ES,	0.143	n/a
11:85718585|85742653	85734459:85734584	ES,	0.143	n/a
12:65720606|65762806	65753285:65753422	A5SS,	0.143	n/a
13:45725822|45781640	45769477:45769650	ES,	0.143	n/a
16:85810161|85814886	85814813:85814886	A5SS,	0.143	n/a
19:2936522|2939405	2939244:2939405	A5SS,	0.143	n/a
3:98600384|98611450	98609236:98609300	ES,	0.143	n/a
16:31733947|31734674	31734382:31734674	A3SS,	0.14	n/a
15:25650608|25660989	25652214:25652284	ES,	0.139	n/a
16:88008654|88017865	88008654:88008809	A5SS,	0.139	n/a
7:2269619|2270362	2270180:2270362	A5SS,	0.139	n/a
3:57569625|57570191	57569625:57569734	A3SS,	0.133	n/a
11:128993341|129034322	128994183:128994355	ES,A3SS,	0.132	n/a
13:114806476|114839312	114806476:114806565	A3SS,	0.132	n/a
1:197564338|197684204	197641167:197641286	ES,	0.13	n/a
20:10536879|10541468	10537967:10538074	ES,	0.13	n/a
7:77016677|77035422	77028785:77028854	ES,	0.13	n/a
6:42941741|42942776	42941741:42941843	A3SS,	0.129	n/a
5:76745585|76760634	76745585:76745685	A3SS,	0.128	n/a
1:3496389|3512011	3498665:3498758	ES,	0.125	n/a
16:89961446|89967202	89965175:89965280	A5SS,	0.125	n/a
3:141231005|141259451	141248556:141248644	A3SS,	0.125	n/a
3:141231005|141259451	141235170:141235267	A5SS,	0.125	n/a
10:105197772|105198565	105197968:105198082	ES,	0.122	n/a
3:57832924|57843886	57842287:57842375	ES,	0.12	n/a
9:138773479|138774924	138774061:138774222	ES,	0.119	n/a
16:88008654|88017865	88008654:88008813	A5SS,	0.111	n/a
2:234296903|234307095	234298541:234298687	ES,	0.111	n/a
7:74119496|74133260	74129177:74129236	ES,	0.106	n/a
3:52946554|52950230	52946554:52946638	A3SS,	0.105	n/a
7:156516806|156619438	156518129:156518219	ES,	0.105	n/a
9:115024715|115060196	115060121:115060196	A5SS,	0.105	n/a
13:80080303|80095110	80092662:80092716	ES,	0.104	n/a
3:138289160|138291774	138289876:138289976	A3SS,	0.104	n/a
6:87925621|87928449	87925621:87925680	A5SS,	0.103	n/a
13:31789188|31803431	31802109:31802251	ES,	0.1	n/a
5:32268807|32276848	32270951:32271053	A5SS,	0.1	n/a
11:46098305|46113774	46112006:46112132	A3SS,	0.095	n/a
2:135010666|135028121	135010666:135010816	A5SS,	0.095	n/a
3:196842798|196846401	196842798:196842895	A3SS,	0.095	n/a
7:65592691|65599361	65595114:65595235	ES,	0.095	n/a
17:1746097|1747980	1747214:1747321	A5SS,	0.083	n/a
2:64083440|64085070	64084098:64084136	ES,	0.082	n/a
12:70193989|70195501	70193989:70194112	A5SS,	0.077	n/a
19:55610152|55614936	55611151:55611259	ES,	0.077	n/a
5:109049221|109051965	109051861:109051965	A3SS,	0.077	n/a
5:122881111|122893258	122885922:122885996	ES,	0.077	n/a
7:130630479|130737314	130652148:130652276	ES,	0.077	n/a
9:131882792|131885417	131882792:131882907	A5SS,	0.074	n/a
13:61013822|61041513	61018821:61018882	A3SS,	0.071	n/a
6:83728692|83748204	83735477:83735598	ES,	0.071	n/a
2:75745182|75753325	75747320:75747394	ES,	0.067	n/a
4:186168448|186209236	186203958:186204056	ES,	0.067	n/a
2:64083440|64085070	64083922:64084016	ES,	0.065	n/a
3:196817783|196846401	196842825:196842954	A5SS,	0.065	n/a
2:240929491|240946787	240945165:240945258	ES,	0.063	n/a
1:247320302|247323115	247320302:247320509	A3SS,	0.062	n/a
2:225400245|225422573	225412634:225412676	ES,A5SS,	0.062	n/a
2:225400245|225422573	225412638:225412676	ES,A5SS,	0.062	n/a
3:41746549|41759353	41746746:41746778	A3SS,	0.062	n/a
7:104678573|104681470	104678832:104678972	ES,	0.062	n/a
1:9991949|9994918	9994830:9994918	A5SS,	0.06	n/a
3:196831774|196846401	196842798:196842895	A3SS,	0.059	n/a
7:158528194|158531812	158529979:158530138	ES,	0.059	n/a
7:44684926|44687358	44687043:44687129	ES,	0.057	n/a
17:66110563|66121621	66111202:66111319	ES,	0.056	n/a
17:59853762|59857762	59855481:59855557	ES,	0.048	n/a
11:46515158|46534363	46534266:46534363	A5SS,	0.047	n/a
3:196807922|196846401	196842798:196842895	A3SS,	0.045	n/a
9:95030456|95032265	95032160:95032265	A5SS,	0.042	n/a
5:176370336|176385155	176378525:176378578	A5SS,	0.038	n/a
5:176370336|176385155	176370336:176370433	A3SS,	0.038	n/a
14:80963812|80997230	80993513:80993605	ES,	0.036	n/a
9:33953283|33973235	33971649:33971735	A3SS,	0.034	n/a
7:43679048|43680248	43680159:43680248	A5SS,	0.033	n/a
1:197611841|197627499	197616185:197616244	ES,	0.032	n/a
2:61749746|61753656	61752177:61752238	ES,	0.031	n/a
21:16386665|16415895	16412684:16412737	ES,	0.03	n/a
2:225400245|225422573	225421012:225421161	ES,A3SS,	0.029	n/a
21:38792601|38802702	38794884:38794954	ES,	0.029	n/a
7:156516806|156619438	156518458:156518531	ES,	0.029	n/a
8:131370263|131374017	131373906:131374017	A5SS,	0.029	n/a
13:61013822|61034674	61018821:61018882	A3SS,	0.024	n/a
X:71681854|71684581	71681854:71681952	A3SS,	0.024	n/a
7:716866|720363	717783:717878	ES,	0.022	n/a
3:196817783|196846401	196817783:196817861	A3SS,	0.019	n/a
7:104678573|104681470	104679600:104679716	ES,	0.019	n/a
8:80182258|80201046	80198025:80198156	A3SS,	0.019	n/a
12:116534474|116549317	116547846:116548064	ES,	0.018	n/a
12:116668338|116675510	116669875:116669961	ES,A5SS,	0.018	n/a
2:24787164|24807429	24795035:24795101	ES,	0.018	n/a
2:29006773|29011675	29008397:29008464	ES,	0.018	n/a
17:44159807|44172067	44159807:44159898	A3SS,	0.017	n/a
7:102665510|102669865	102669047:102669195	ES,	0.017	n/a
8:80182258|80201046	80192228:80192360	ES,	0.017	n/a
9:138773479|138774924	138773479:138774924	IR,	0.017	n/a
12:46622936|46637097	46623391:46623422	A5SS,	0.015	n/a
2:61749746|61753656	61752627:61752709	ES,	0.012	n/a
3:196842798|196846401	196845765:196845873	ES,	0.01	n/a
20:7976673|7990962	7980356:7980507	A5SS,	0.007	n/a
7:716866|751164	739944:739989	ES,	0.003	n/a
7:716866|751164	717783:717878	ES,	0.002	n/a

## Sheet: SRR5889369_SW480_rep2
circRNA_id	alternatively_spliced_exon	AS_type	psi_estimation_without_correction	psi_estimation_after_correction
1:214564331|214571344	214564331:214564388	A3SS,	1	n/a
1:247318868|247323115	247318868:247318997	A3SS,	1	n/a
10:15858834|15889942	15863655:15863725	ES,	1	n/a
11:46098305|46113774	46112006:46112117	ES,	1	n/a
15:22872399|22877969	22877828:22877969	A3SS,	1	n/a
15:22872399|22877969	22872399:22872499	A5SS,	1	n/a
15:25650608|25660989	25652214:25652284	ES,	1	n/a
16:83940592|83945972	83940592:83940704	A5SS,	1	n/a
16:88008654|88017865	88008654:88008791	A5SS,	1	n/a
17:57842332|57851246	57842332:57842499	A5SS,	1	n/a
17:57842332|57851305	57842332:57842499	A5SS,	1	n/a
17:60111148|60112969	60111148:60111345	A3SS,	1	n/a
17:62587202|62602758	62587202:62587267	A3SS,	1	n/a
17:80842021|80869665	80863812:80863929	ES,	1	n/a
2:24357989|24369956	24362240:24362320	ES,	1	n/a
2:29073194|29084174	29075274:29075365	A3SS,	1	n/a
2:98504515|98543950	98541809:98541928	A3SS,	1	n/a
2:122260743|122287901	122273241:122273338	ES,	1	n/a
2:148730308|148739650	148731017:148731093	A5SS,	1	n/a
2:169018297|169038600	169023809:169023917	A3SS,	1	n/a
2:215609791|215634036	215610446:215610578	A3SS,	1	n/a
2:239090706|239093928	239092294:239092381	A3SS,	1	n/a
20:33632308|33645374	33637669:33637797	A3SS,	1	n/a
21:38792601|38845182	38794076:38794168	ES,	1	n/a
3:17549966|17665405	17549966:17550097	A3SS,	1	n/a
3:52946554|52950230	52946554:52946663	A3SS,	1	n/a
3:119219542|119232566	119219542:119219707	A5SS,	1	n/a
3:149563798|149639014	149638921:149639014	A3SS,	1	n/a
3:149613260|149639014	149629765:149629870	A5SS,	1	n/a
5:68470704|68471364	68470704:68470940	A5SS,	1	n/a
5:76745585|76760634	76758920:76759051	A3SS,	1	n/a
5:111594926|111602027	111595588:111595676	A3SS,	1	n/a
5:111594926|111616020	111595588:111595676	A3SS,	1	n/a
5:122881111|122893258	122888801:122888841	ES,	1	n/a
5:145144494|145155993	145153908:145153981	ES,	1	n/a
5:176378475|176385155	176378475:176378578	A3SS,	1	n/a
6:86227474|86239993	86237980:86238080	ES,	1	n/a
6:86227474|86239993	86239910:86239993	A5SS,	1	n/a
7:716866|751164	720193:720363	A3SS,	1	n/a
7:16415717|16445962	16415717:16415866	A3SS,	1	n/a
7:102665510|102669865	102669047:102669195	ES,	1	n/a
7:156516806|156619438	156518458:156518531	ES,	1	n/a
7:156516806|156619438	156518129:156518219	ES,	1	n/a
8:126692177|126738132	126692177:126692273	A5SS,	1	n/a
11:33307959|33309057	33307959:33309057	IR,	0.996	n/a
14:102506573|102507010	102506935:102507010	A3SS,	0.992	n/a
2:64083440|64085070	64084963:64085070	A3SS,	0.984	n/a
5:176370336|176385155	176385094:176385155	A5SS,	0.981	n/a
6:87925621|87928449	87925621:87925775	A5SS,	0.98	n/a
11:128993341|128994789	128993783:128993824	ES,	0.978	n/a
12:46622936|46637097	46633462:46633676	ES,	0.975	n/a
5:176370336|176385155	176382960:176383036	ES,	0.974	n/a
2:58311224|58316858	58312016:58312085	A5SS,	0.971	n/a
8:48196617|48206619	48203620:48203726	A3SS,	0.97	n/a
8:48196617|48206619	48196617:48196668	A5SS,	0.97	n/a
11:128963516|129034322	128993783:128993824	ES,	0.957	n/a
5:176370336|176385155	176378475:176378578	A3SS,	0.955	n/a
5:138614016|138614818	138614254:138614429	ES,	0.954	n/a
1:9991949|9994918	9994820:9994918	A5SS,	0.948	n/a
11:20424465|20448411	20426424:20426529	ES,	0.946	n/a
2:61749746|61753656	61752405:61752468	ES,	0.943	n/a
2:75745182|75749613	75747320:75747394	ES,	0.939	n/a
12:111991962|111993723	111992670:111992878	A3SS,	0.938	n/a
5:176370336|176385155	176370336:176370489	A3SS,	0.938	n/a
13:61013822|61041513	61018817:61018882	A3SS,	0.935	n/a
7:74119496|74133260	74133198:74133260	A3SS,	0.932	n/a
14:102506573|102507010	102506573:102506747	A5SS,	0.93	n/a
18:76953183|76974038	76953183:76953263	A5SS,	0.923	n/a
18:76953183|76974038	76966937:76967012	A3SS,	0.923	n/a
3:196831774|196846401	196842798:196842954	A3SS,	0.923	n/a
7:77214860|77230123	77221502:77221573	A3SS,	0.92	n/a
20:10536879|10541468	10541089:10541139	ES,	0.919	n/a
14:67431908|67525503	67525366:67525503	A3SS,	0.917	n/a
3:57875768|57882659	57881974:57882098	ES,	0.917	n/a
7:11101418|11151094	11101418:11101468	A5SS,	0.912	n/a
4:151682935|151729550	151727423:151727556	A3SS,	0.909	n/a
1:42730786|42744343	42744019:42744343	IR,	0.905	n/a
9:86297866|86301070	86297866:86297981	A3SS,	0.9	n/a
9:114148657|114154104	114151836:114152003	A3SS,	0.9	n/a
3:196842798|196846401	196842798:196842954	A3SS,	0.898	n/a
3:138289160|138291774	138289876:138289999	A3SS,	0.896	n/a
9:33960824|33973235	33963724:33963789	ES,	0.896	n/a
X:106331666|106332069	106331666:106332069	IR,	0.895	n/a
5:95091100|95099324	95091100:95091465	IR,	0.89	n/a
11:46098305|46113774	46098305:46098370	A3SS,	0.889	n/a
12:70193989|70195501	70193989:70194112	A5SS,	0.889	n/a
9:101542471|101544855	101542471:101542578	A3SS,	0.889	n/a
1:231090079|231097049	231092167:231092228	ES,	0.875	n/a
4:139993020|139994721	139993020:139993193	A3SS,	0.875	n/a
4:148860976|148887990	148860976:148861050	A5SS,	0.868	n/a
21:38792601|38802702	38801169:38801210	ES,	0.847	n/a
6:42559889|42562042	42560248:42560352	ES,	0.846	n/a
3:188208210|188242575	188208210:188208429	A5SS,	0.842	n/a
3:188208210|188242575	188242453:188242575	A3SS,	0.842	n/a
17:62817885|62818511	62817885:62818170	A3SS,	0.838	n/a
3:196812451|196846401	196842798:196842954	A3SS,	0.836	n/a
19:19750894|19751380	19751105:19751380	IR,	0.833	n/a
11:122646927|122647918	122646927:122646984	A5SS,	0.81	n/a
17:80828100|80858607	80851423:80851508	ES,	0.802	n/a
14:76633006|76662315	76647107:76647192	ES,	0.8	n/a
5:142434004|142437312	142437207:142437312	A3SS,	0.8	n/a
22:30032740|30038274	30035079:30035201	A5SS,	0.789	n/a
3:180651122|180653019	180652515:180652586	ES,	0.789	n/a
9:95030456|95032265	95032167:95032265	A5SS,	0.789	n/a
17:34147028|34147441	34147168:34147252	A5SS,	0.786	n/a
21:16386665|16415895	16387466:16387546	ES,	0.785	n/a
12:70149164|70150443	70149164:70149439	IR,	0.784	n/a
9:33960824|33973235	33971649:33971752	A3SS,	0.778	n/a
1:155891166|155891709	155891166:155891318	A3SS,	0.759	n/a
2:10784446|10808849	10794607:10794673	ES,	0.758	n/a
10:116091562|116093054	116092554:116092633	ES,	0.75	n/a
15:25650608|25667108	25652214:25652284	ES,	0.75	n/a
19:3660964|3661999	3661371:3661524	ES,	0.75	n/a
9:14639894|14680160	14674185:14674383	A3SS,	0.75	n/a
13:52992127|53001354	53001124:53001201	ES,	0.745	n/a
16:31733947|31734674	31734579:31734674	A3SS,	0.739	n/a
3:31917925|31921322	31920922:31921045	ES,	0.739	n/a
2:234296903|234299129	234298575:234298687	A3SS,	0.736	n/a
9:33971649|33973235	33971649:33971752	A3SS,	0.734	n/a
22:24698163|24709434	24708072:24708099	ES,	0.733	n/a
7:77407655|77408131	77407951:77408131	A3SS,	0.71	n/a
1:247320302|247323115	247320302:247320519	A3SS,	0.707	n/a
21:38792601|38802702	38797992:38798083	ES,	0.707	n/a
11:61133517|61135470	61134900:61134997	ES,A5SS,	0.704	n/a
11:62406455|62407203	62406455:62406604	A3SS,	0.69	n/a
9:33996221|34017187	34011625:34011662	ES,	0.684	n/a
12:116668338|116675510	116674626:116674695	ES,	0.682	n/a
14:76642966|76662315	76647107:76647192	ES,	0.68	n/a
3:142455221|142467302	142462327:142462428	ES,	0.677	n/a
9:125042722|125054119	125048318:125048445	ES,	0.676	n/a
1:41578955|41582682	41578955:41579225	A3SS,	0.667	n/a
16:85810161|85814886	85813985:85814075	A3SS,	0.667	n/a
2:120634899|120640199	120635019:120635118	A3SS,	0.667	n/a
20:25614685|25626284	25614685:25614806	A5SS,	0.667	n/a
15:25650608|25667108	25653767:25653831	ES,	0.65	n/a
2:175779786|175816930	175809898:175809989	ES,	0.636	n/a
7:148529726|148544397	148533914:148534050	ES,	0.636	n/a
17:80828100|80858607	80847544:80847573	ES,	0.628	n/a
8:141874411|141900868	141889570:141889736	ES,	0.627	n/a
17:1540003|1540356	1540003:1540149	A3SS,	0.625	n/a
7:155295716|155301792	155299715:155299795	A3SS,	0.625	n/a
9:88920107|88924932	88923398:88923521	A5SS,	0.625	n/a
9:33953283|33963789	33956077:33956144	ES,	0.619	n/a
2:9419446|9437574	9427133:9427241	ES,	0.614	n/a
17:80858527|80869665	80861281:80861354	ES,	0.612	n/a
2:131829428|131840230	131829595:131829868	A3SS,	0.611	n/a
11:128963516|128994789	128994183:128994355	A3SS,	0.6	n/a
20:47591303|47592736	47591303:47591411	A5SS,	0.6	n/a
21:16386665|16417644	16415816:16415895	A3SS,	0.6	n/a
7:11101418|11151094	11150152:11150178	ES,	0.6	n/a
9:96233423|96261168	96233423:96233669	A5SS,	0.6	n/a
2:207144264|207162097	207156738:207156840	ES,	0.593	n/a
11:17899755|18031686	18031618:18031686	A5SS,	0.583	n/a
5:109049221|109051965	109051861:109051965	A3SS,	0.583	n/a
7:16722405|16729531	16725530:16725665	A3SS,	0.583	n/a
17:80842021|80869665	80851423:80851508	ES,	0.576	n/a
15:25650608|25660989	25660857:25660989	A5SS,	0.571	n/a
11:128993341|129034322	128993783:128993824	ES,	0.568	n/a
7:32914319|32914769	32914319:32914769	IR,	0.565	n/a
15:65445885|65447419	65447139:65447419	A5SS,	0.562	n/a
15:65445885|65447419	65445885:65445970	A3SS,	0.562	n/a
2:207144264|207162097	207145350:207145426	ES,	0.559	n/a
11:86778736|86802437	86786679:86786828	ES,	0.551	n/a
17:80842021|80869665	80861281:80861354	ES,	0.545	n/a
5:74130251|74137504	74130251:74130318	A3SS,	0.545	n/a
3:196817783|196846401	196817783:196817897	A3SS,	0.544	n/a
17:80842021|80869665	80847544:80847573	ES,	0.533	n/a
6:167435897|167440103	167435897:167436119	A5SS,	0.533	n/a
14:62188227|62188541	62188227:62188541	IR,	0.532	n/a
1:31478700|31501711	31478700:31478814	A3SS,	0.529	n/a
16:23573946|23578390	23575360:23575410	A5SS,	0.529	n/a
20:21321359|21327188	21326472:21326529	ES,	0.529	n/a
4:148860976|148887990	148887831:148887990	A3SS,	0.524	n/a
10:96201653|96234540	96207392:96207427	ES,	0.523	n/a
2:240929491|240946787	240939600:240939804	ES,	0.523	n/a
11:128993341|128994789	128994183:128994355	ES,A3SS,	0.522	n/a
1:59805630|59812070	59810670:59810718	ES,	0.515	n/a
2:24516557|24518673	24517773:24517886	ES,	0.515	n/a
13:33091994|33101669	33101595:33101669	A5SS,	0.513	n/a
2:201721405|201721708	201721405:201721708	IR,	0.509	n/a
15:36936479|36950106	36939770:36939859	ES,	0.5	n/a
9:34286615|34290387	34288361:34288477	ES,	0.5	n/a
17:49340635|49346265	49345574:49345689	ES,	0.494	n/a
12:116668338|116675510	116669864:116669961	ES,	0.487	n/a
13:33091994|33101669	33101545:33101669	A5SS,	0.487	n/a
9:36581641|36607670	36583624:36583709	ES,	0.478	n/a
4:148860976|148887990	148887853:148887990	A3SS,	0.476	n/a
1:31478700|31501711	31478700:31478878	A3SS,	0.471	n/a
16:23573946|23578390	23575360:23575430	A5SS,	0.471	n/a
6:167435897|167440103	167435897:167436123	A5SS,	0.467	n/a
8:80182258|80201046	80194314:80194367	ES,	0.458	n/a
3:196817783|196846401	196817783:196817839	A3SS,	0.456	n/a
5:74130251|74137504	74130251:74130422	A3SS,	0.455	n/a
3:98586135|98600611	98595511:98595555	ES,	0.451	n/a
21:45513944|45518415	45516486:45516594	ES,	0.439	n/a
15:65445885|65447419	65447120:65447419	A5SS,	0.438	n/a
15:65445885|65447419	65445885:65445977	A3SS,	0.438	n/a
15:25650608|25660989	25660862:25660989	A5SS,	0.429	n/a
18:29218607|29246335	29237939:29238052	ES,	0.429	n/a
15:25650608|25657118	25653767:25653831	ES,	0.418	n/a
11:17899755|18031686	18031622:18031686	A5SS,	0.417	n/a
5:109049221|109051965	109051821:109051965	A3SS,	0.417	n/a
7:16722405|16729531	16725549:16725665	A3SS,	0.417	n/a
2:64083440|64085070	64084684:64084852	ES,	0.402	n/a
1:231081135|231097049	231092167:231092228	ES,	0.4	n/a
2:136505837|136519481	136511729:136511847	ES,	0.4	n/a
20:47591303|47592736	47591303:47591379	A5SS,	0.4	n/a
21:16386665|16417644	16415816:16415891	A3SS,	0.4	n/a
21:38792601|38845182	38802571:38802702	ES,	0.4	n/a
7:65592691|65599361	65595114:65595235	ES,	0.4	n/a
9:96233423|96261168	96233423:96233494	A5SS,	0.4	n/a
12:116534474|116549317	116547579:116547674	ES,	0.394	n/a
2:131829428|131840230	131829595:131829827	A3SS,	0.389	n/a
1:51926763|51930998	51929679:51929736	ES,	0.378	n/a
17:1540003|1540356	1540003:1540112	A3SS,	0.375	n/a
2:20507739|20527139	20526022:20526146	ES,	0.375	n/a
7:155295716|155301792	155299715:155299811	A3SS,	0.375	n/a
9:88920107|88924932	88923344:88923521	A5SS,	0.375	n/a
1:108724563|108728576	108727765:108727892	ES,	0.364	n/a
1:23356962|23377013	23370920:23370979	ES,	0.359	n/a
12:109046048|109048186	109046814:109046957	ES,	0.349	n/a
17:3717616|3719564	3718860:3718918	ES,	0.348	n/a
1:41578955|41582682	41578955:41579198	A3SS,	0.333	n/a
11:128963516|128994789	128994183:128994290	A3SS,	0.333	n/a
16:85810161|85814886	85813985:85814079	A3SS,	0.333	n/a
2:120634899|120640199	120635040:120635118	A3SS,	0.333	n/a
20:25614685|25626284	25614685:25614790	A5SS,	0.333	n/a
21:40600426|40601362	40601060:40601145	ES,	0.333	n/a
6:159026299|159029782	159028276:159028375	ES,	0.333	n/a
8:141856359|141900868	141889570:141889736	ES,	0.333	n/a
11:128993341|128994789	128993783:128994789	IR,	0.324	n/a
12:19615444|19626289	19619682:19619784	ES,	0.323	n/a
3:80680382|80683122	80680887:80681005	ES,	0.316	n/a
11:62406455|62407203	62406455:62406582	A3SS,	0.31	n/a
12:22646157|22659753	22650513:22650561	ES,	0.308	n/a
15:90414707|90432372	90420538:90420656	ES,	0.305	n/a
12:116668238|116675510	116674626:116674695	ES,	0.304	n/a
9:134381501|134381840	134381501:134381840	IR,	0.3	n/a
2:136505837|136519481	136511109:136511137	ES,	0.294	n/a
7:77407655|77408131	77407847:77408131	A3SS,	0.29	n/a
17:80842021|80869665	80858527:80858607	ES,	0.282	n/a
8:80182258|80204573	80194314:80194367	ES,	0.281	n/a
X:24190832|24197887	24191724:24191840	ES,	0.277	n/a
19:34685383|34706566	34706029:34706205	ES,	0.276	n/a
9:102677460|102691125	102678331:102678450	ES,	0.276	n/a
14:76642966|76662315	76644566:76644665	ES,	0.275	n/a
9:33971649|33973235	33971649:33971735	A3SS,	0.266	n/a
2:234296903|234299129	234298541:234298687	A3SS,	0.264	n/a
16:31733947|31734674	31734382:31734674	A3SS,	0.261	n/a
19:13039156|13039661	13039156:13039477	IR,	0.257	n/a
9:14639894|14680160	14674185:14674214	A3SS,	0.25	n/a
20:30954187|30989835	30959581:30959677	ES,	0.245	n/a
1:155891166|155891709	155891166:155891419	A3SS,	0.241	n/a
2:240929491|240946787	240942466:240942553	ES,	0.231	n/a
9:33960824|33973235	33971649:33971735	A3SS,	0.222	n/a
2:207144264|207162097	207145274:207145317	ES,	0.217	n/a
5:132219032|132220811	132219811:132219880	ES,	0.217	n/a
17:34147028|34147441	34147168:34147243	A5SS,	0.214	n/a
22:30032740|30038274	30035079:30035320	A5SS,	0.211	n/a
9:95030456|95032265	95032160:95032265	A5SS,	0.211	n/a
15:25650608|25657118	25652214:25652284	ES,A3SS,	0.207	n/a
2:61749746|61761038	61752405:61752468	ES,	0.205	n/a
11:128993341|128994789	128994183:128994348	ES,A3SS,	0.203	n/a
5:142434004|142437312	142437215:142437312	A3SS,	0.2	n/a
10:96201653|96234540	96211315:96211366	ES,	0.195	n/a
2:45773871|45780869	45778264:45778421	ES,	0.193	n/a
11:122646927|122647918	122646927:122646980	A5SS,	0.19	n/a
12:116534474|116549317	116547846:116548064	ES,	0.19	n/a
2:64083440|64085070	64083922:64084016	ES,	0.187	n/a
13:31789188|31803431	31797578:31797650	ES,	0.174	n/a
7:27668990|27689252	27688167:27688263	ES,	0.17	n/a
3:196812451|196846401	196842798:196842895	A3SS,	0.164	n/a
17:62817885|62818511	62817885:62818125	A3SS,	0.162	n/a
11:128993341|129034322	128997107:128997200	ES,	0.158	n/a
3:188208210|188242575	188242451:188242575	A3SS,	0.158	n/a
3:188208210|188242575	188208210:188208400	A5SS,	0.158	n/a
2:240929491|240946787	240945165:240945258	ES,	0.157	n/a
20:30954187|30978970	30959581:30959677	ES,	0.143	n/a
4:148860976|148887990	148860976:148861010	A5SS,	0.132	n/a
7:128281257|128289036	128287977:128288095	ES,	0.132	n/a
10:96201653|96234540	96204228:96204296	ES,	0.129	n/a
4:139993020|139994721	139993020:139993157	A3SS,	0.125	n/a
1:247320302|247323115	247320302:247320423	A3SS,	0.122	n/a
9:102677460|102691125	102684484:102684577	ES,	0.115	n/a
11:46098305|46113774	46098305:46098391	A3SS,	0.111	n/a
12:70193989|70195501	70193989:70194117	A5SS,	0.111	n/a
3:98600384|98611450	98609236:98609300	ES,	0.111	n/a
9:101542471|101544855	101542471:101542619	A3SS,	0.111	n/a
11:128993341|129034322	128994183:128994355	ES,	0.105	n/a
3:138289160|138291774	138289876:138289976	A3SS,	0.104	n/a
3:196842798|196846401	196842798:196842895	A3SS,	0.102	n/a
9:86297866|86301070	86297866:86297946	A3SS,	0.1	n/a
9:114148657|114154104	114151836:114151907	A3SS,	0.1	n/a
1:247320302|247323115	247320302:247320445	A3SS,	0.098	n/a
17:59853762|59857762	59855481:59855540	ES,	0.094	n/a
5:50045985|50059076	50052953:50053049	ES,	0.094	n/a
9:114148657|114154104	114153748:114153858	ES,	0.094	n/a
4:151682935|151729550	151727423:151727522	A3SS,	0.091	n/a
7:11101418|11151094	11101418:11101478	A5SS,	0.088	n/a
14:67431908|67525503	67525346:67525503	A3SS,	0.083	n/a
9:96233423|96238620	96236515:96236612	ES,	0.083	n/a
7:77214860|77230123	77221514:77221573	A3SS,	0.08	n/a
18:76953183|76974038	76953183:76953267	A5SS,	0.077	n/a
18:76953183|76974038	76966941:76967012	A3SS,	0.077	n/a
3:196831774|196846401	196842798:196842895	A3SS,	0.077	n/a
1:247320302|247323115	247320302:247320509	A3SS,	0.073	n/a
2:64083440|64085070	64084098:64084136	ES,	0.073	n/a
7:74119496|74133260	74133180:74133260	A3SS,	0.068	n/a
11:128963516|128994789	128994183:128994348	A3SS,	0.067	n/a
13:61013822|61041513	61018821:61018882	A3SS,	0.065	n/a
12:111991962|111993723	111992670:111992873	A3SS,	0.062	n/a
14:102506573|102507010	102506573:102506776	A5SS,	0.062	n/a
5:176370336|176385155	176370336:176370384	A3SS,	0.062	n/a
2:61749746|61753656	61752177:61752238	ES,	0.059	n/a
20:30954187|30989835	30978878:30978970	ES,	0.058	n/a
1:9991949|9994918	9994830:9994918	A5SS,	0.052	n/a
X:24190832|24197887	24193506:24193560	ES,	0.046	n/a
5:176370336|176385155	176378475:176378546	A3SS,	0.045	n/a
3:149563798|149589941	149583608:149583671	ES,	0.04	n/a
11:61133517|61135470	61134900:61135152	ES,A5SS,	0.037	n/a
12:116668238|116675510	116669864:116669961	ES,	0.034	n/a
8:48196617|48206619	48203622:48203726	A3SS,	0.03	n/a
8:48196617|48206619	48196617:48196683	A5SS,	0.03	n/a
9:138773479|138774924	138774061:138774222	ES,	0.03	n/a
2:58311224|58316858	58312016:58312134	A5SS,	0.029	n/a
7:22306583|22357656	22327655:22327771	ES,	0.028	n/a
6:87925621|87928449	87925621:87925680	A5SS,	0.02	n/a
7:27668990|27689252	27676295:27676356	ES,	0.02	n/a
5:176370336|176385155	176385107:176385155	A5SS,	0.019	n/a
5:176370336|176385155	176372038:176372139	ES,	0.017	n/a
2:64083440|64085070	64085007:64085070	A3SS,	0.016	n/a
4:129913322|129925031	129921996:129922100	ES,	0.016	n/a
14:102506573|102507010	102506933:102507010	A3SS,	0.008	n/a
14:102506573|102507010	102506573:102506756	A5SS,	0.008	n/a
21:16386665|16415895	16412684:16412737	ES,	0.006	n/a

## Sheet: SRR5889362_SW480_rep3
circRNA_id	alternatively_spliced_exon	AS_type	psi_estimation_without_correction	psi_estimation_after_correction
1:42730786|42776781	42744019:42744343	A3SS,	1	n/a
1:179869261|179877808	179869261:179869302	A5SS,	1	n/a
10:32197100|32199491	32197100:32197854	A3SS,	1	n/a
11:18010144|18029623	18010144:18010302	A3SS,	1	n/a
11:18010144|18031686	18031618:18031686	A5SS,	1	n/a
11:85692788|85707972	85701293:85701442	ES,	1	n/a
12:19498776|19501453	19500041:19500116	ES,	1	n/a
13:52992127|53001354	53001124:53001201	ES,	1	n/a
13:114164553|114175048	114173850:114174116	A5SS,	1	n/a
14:71880665|71996087	71884847:71884913	ES,	1	n/a
14:76633006|76644385	76644331:76644385	A3SS,	1	n/a
14:97312432|97327072	97326894:97327072	A3SS,	1	n/a
15:62325640|62336454	62327095:62327251	A5SS,	1	n/a
15:100794341|100871259	100794341:100794384	A3SS,	1	n/a
16:27222467|27226329	27222467:27222542	A5SS,	1	n/a
16:47531310|47549512	47549432:47549512	A3SS,	1	n/a
17:4186093|4210418	4200012:4200109	A3SS,	1	n/a
17:42501717|42552271	42501717:42501779	A3SS,	1	n/a
17:62587202|62602758	62587202:62587267	A3SS,	1	n/a
17:80828100|80869665	80858527:80858607	ES,	1	n/a
17:80828100|80869665	80863812:80863929	ES,	1	n/a
17:80842021|80861354	80858527:80858607	ES,	1	n/a
17:80842021|80869665	80861281:80861354	ES,	1	n/a
17:80842021|80869665	80858527:80858607	ES,	1	n/a
17:80842021|80869665	80851423:80851508	ES,	1	n/a
17:80842021|80869665	80863812:80863929	ES,	1	n/a
17:80842021|80869665	80847544:80847573	ES,	1	n/a
2:24357989|24369956	24362240:24362320	ES,	1	n/a
2:29073194|29084174	29075274:29075365	A3SS,	1	n/a
2:45773871|45789895	45780762:45780869	ES,	1	n/a
2:58425729|58459247	58449077:58449177	A3SS,	1	n/a
2:215632206|215661841	215657021:215657169	ES,	1	n/a
20:2967411|2969120	2968009:2968070	ES,	1	n/a
20:33632308|33645374	33637669:33637797	A3SS,	1	n/a
20:50290692|50307358	50305603:50305678	A3SS,	1	n/a
21:45165960|45168961	45166997:45167173	ES,	1	n/a
22:41721568|41721922	41721568:41721601	A5SS,	1	n/a
3:11399892|11421526	11406133:11406208	ES,	1	n/a
3:11399892|11421526	11404287:11404402	A5SS,	1	n/a
3:33109722|33110462	33109722:33109782	A3SS,	1	n/a
3:57875768|57882659	57881974:57882098	ES,	1	n/a
5:111594926|111602027	111595588:111595676	A3SS,	1	n/a
5:111594926|111643187	111595588:111595676	A3SS,	1	n/a
5:111595588|111602027	111595588:111595676	A3SS,	1	n/a
5:130883740|130928159	130883740:130883883	A3SS,	1	n/a
5:130883740|130940386	130883740:130883883	A3SS,	1	n/a
5:141836545|141847396	141836545:141836674	A5SS,	1	n/a
7:2269619|2270362	2269619:2269778	A3SS,	1	n/a
7:2269619|2270399	2269619:2269778	A3SS,	1	n/a
7:75728758|75730732	75730550:75730732	A5SS,	1	n/a
7:131071879|131084192	131082026:131082135	A5SS,	1	n/a
8:42780700|42785315	42783869:42783953	ES,A5SS,	1	n/a
9:33036572|33037113	33036826:33036882	A5SS,	1	n/a
9:96233423|96261168	96261072:96261168	A3SS,	1	n/a
9:114148657|114154104	114154036:114154104	A5SS,	1	n/a
9:114148657|114154104	114152264:114152381	A3SS,	1	n/a
9:134381501|134381840	134381501:134381607	A5SS,	1	n/a
9:140458886|140459606	140458886:140459058	A3SS,	1	n/a
9:140458886|140459606	140459537:140459606	A5SS,	1	n/a
9:140458886|140459606	140459345:140459410	ES,	1	n/a
2:58449077|58459247	58449077:58449177	A3SS,	0.987	n/a
13:61013822|61041513	61018817:61018882	A3SS,	0.985	n/a
2:61749746|61753656	61752405:61752468	ES,	0.985	n/a
5:137320946|137324004	137320946:137321078	A3SS,	0.979	n/a
17:57808782|57816308	57814814:57814904	ES,	0.976	n/a
12:111990084|111993723	111991962:111992021	ES,	0.975	n/a
17:53478830|53481229	53479575:53479664	A5SS,	0.975	n/a
5:95091100|95099324	95091100:95091465	A5SS,	0.972	n/a
14:81362062|81372425	81372299:81372425	A5SS,	0.97	n/a
2:9419446|9437574	9419446:9419518	A5SS,	0.97	n/a
2:175779786|175816930	175809898:175809989	ES,	0.97	n/a
7:99621042|99621930	99621042:99621555	IR,	0.97	n/a
3:196831774|196846401	196842798:196842954	A3SS,	0.969	n/a
14:102506573|102507010	102506573:102506747	A5SS,	0.968	n/a
9:33351558|33352717	33352644:33352717	A3SS,	0.968	n/a
9:33351558|33352717	33351558:33351788	A5SS,	0.968	n/a
2:234296903|234299129	234298575:234298687	ES,	0.967	n/a
9:33971649|33973235	33971649:33971752	A3SS,	0.967	n/a
3:196807922|196846401	196842798:196842954	A3SS,	0.959	n/a
2:239090706|239093928	239092294:239092381	ES,	0.955	n/a
5:170610199|170632616	170626674:170626777	A3SS,	0.955	n/a
5:170610199|170632616	170610326:170610434	A5SS,	0.955	n/a
9:114148657|114154104	114151836:114152003	A3SS,	0.955	n/a
13:114174931|114193822	114188360:114188555	A3SS,	0.952	n/a
3:157839892|157841780	157841655:157841780	A3SS,	0.951	n/a
21:38792601|38802702	38801169:38801210	ES,	0.949	n/a
15:100794341|100871259	100821434:100821606	A3SS,	0.947	n/a
1:51926763|51930998	51929345:51929470	A5SS,	0.946	n/a
3:196118684|196129890	196120425:196120490	A5SS,	0.946	n/a
8:141874411|141900868	141889570:141889736	ES,	0.941	n/a
11:128993341|129034322	128993783:128993824	ES,A3SS,	0.94	n/a
10:74100547|74100928	74100547:74100626	A3SS,	0.93	n/a
12:111991962|111993723	111992670:111992878	A3SS,	0.928	n/a
7:22347958|22357656	22357606:22357656	A5SS,	0.923	n/a
8:131164982|131181313	131179782:131179868	A3SS,	0.92	n/a
2:58449077|58459247	58456949:58457009	A3SS,	0.914	n/a
9:33953283|33973235	33971649:33971752	A3SS,	0.914	n/a
2:208841375|208842310	208841375:208842310	IR,	0.909	n/a
6:159004986|159010814	159010704:159010814	A3SS,	0.908	n/a
17:80858527|80869665	80861281:80861354	ES,	0.905	n/a
2:197777606|197787849	197787801:197787849	A5SS,	0.902	n/a
15:90414707|90432372	90420538:90420656	ES,	0.9	n/a
16:27224906|27226329	27224906:27225072	A5SS,	0.9	n/a
X:106331666|106332069	106331666:106332069	IR,	0.891	n/a
1:247320302|247323115	247320302:247320519	A3SS,	0.889	n/a
15:72300167|72320134	72302691:72302788	A5SS,	0.889	n/a
5:79498705|79501179	79501026:79501179	A5SS,	0.889	n/a
7:63796637|63797360	63797265:63797360	A3SS,	0.889	n/a
15:80412670|80415142	80414054:80414162	A3SS,	0.886	n/a
3:149563798|149639014	149638921:149639014	A3SS,	0.884	n/a
1:9991949|9995685	9991949:9992030	A3SS,	0.882	n/a
15:72300167|72320134	72311380:72311436	ES,	0.882	n/a
13:33091994|33101669	33096319:33096407	ES,	0.878	n/a
1:44877653|44878394	44877653:44878394	IR,	0.875	n/a
3:196812451|196846401	196842798:196842954	A3SS,	0.875	n/a
10:52193236|52350007	52279591:52279681	ES,	0.871	n/a
17:44159807|44172067	44159807:44159908	A3SS,	0.87	n/a
2:61722590|61726048	61725808:61725927	A3SS,	0.87	n/a
20:30954187|30956926	30954187:30954269	A5SS,	0.87	n/a
20:30954187|30956926	30956818:30956926	A3SS,	0.87	n/a
3:11399892|11468400	11421446:11421526	ES,	0.864	n/a
2:36668401|36669878	36668401:36668643	A5SS,	0.862	n/a
2:36668401|36669878	36669758:36669878	A3SS,	0.862	n/a
20:10536879|10541468	10541348:10541468	A3SS,	0.85	n/a
11:65661485|65664477	65661485:65661592	A3SS,	0.848	n/a
1:8568686|8674745	8601273:8601377	ES,	0.846	n/a
21:16386665|16415895	16387466:16387546	ES,	0.842	n/a
3:196842798|196846401	196842798:196842954	A3SS,	0.838	n/a
10:74474869|74475660	74475520:74475660	A3SS,	0.833	n/a
11:122646927|122647918	122646927:122646980	A5SS,	0.833	n/a
18:12698978|12701112	12698978:12699164	A3SS,	0.833	n/a
2:191774989|191778090	191777919:191778090	A3SS,	0.822	n/a
17:78681641|78682914	78682689:78682914	A3SS,	0.818	n/a
7:77214860|77230123	77229981:77230123	A3SS,	0.818	n/a
12:70193989|70195501	70193989:70194117	A5SS,	0.812	n/a
12:116668338|116675510	116674626:116674695	ES,	0.811	n/a
11:12883797|12886447	12886233:12886447	IR,	0.807	n/a
7:98988516|98988876	98988516:98988722	A5SS,	0.803	n/a
17:47388674|47390207	47390060:47390207	A5SS,	0.8	n/a
3:52946554|52947633	52946554:52946663	A3SS,	0.8	n/a
4:1219148|1235307	1231971:1232125	ES,	0.8	n/a
7:74119496|74131270	74129177:74129236	ES,	0.8	n/a
9:33960824|33973235	33971649:33971752	A3SS,	0.8	n/a
6:150092298|150094305	150093181:150093383	ES,	0.795	n/a
21:38792601|38802702	38794076:38794168	ES,	0.793	n/a
2:169018297|169038600	169023809:169023917	A3SS,	0.789	n/a
6:47471016|47472494	47471731:47471790	ES,	0.788	n/a
2:168869144|168873605	168872985:168873157	A3SS,	0.786	n/a
21:38792601|38802702	38797992:38798083	ES,	0.784	n/a
3:197592294|197602646	197597031:197597149	A3SS,	0.781	n/a
1:41578955|41582682	41578955:41579198	A3SS,	0.778	n/a
17:59853762|59857762	59853762:59853863	A3SS,	0.778	n/a
21:16385894|16415895	16387466:16387546	ES,	0.778	n/a
3:196876614|196921460	196888511:196888609	ES,	0.778	n/a
4:186168448|186209236	186203958:186204056	ES,	0.773	n/a
3:138289160|138291774	138289876:138289999	A3SS,	0.766	n/a
16:31733947|31734674	31734579:31734674	A3SS,	0.762	n/a
1:213251038|213277911	213261304:213261372	ES,	0.75	n/a
11:47650505|47652639	47650505:47650598	A3SS,	0.75	n/a
15:25650608|25657118	25655801:25655852	ES,	0.75	n/a
3:52946554|52950230	52946554:52946638	A3SS,	0.746	n/a
3:72881520|72893574	72891431:72891553	ES,	0.742	n/a
11:128993341|128994789	128994183:128994355	ES,A3SS,	0.738	n/a
11:128963516|128994789	128993783:128993824	ES,	0.733	n/a
14:65922339|65927869	65924612:65924717	ES,	0.733	n/a
11:86778736|86802437	86786679:86786828	ES,	0.732	n/a
6:167435897|167438382	167435897:167436123	A5SS,	0.731	n/a
7:98513346|98515302	98513346:98513511	A5SS,	0.727	n/a
3:197592294|197602646	197592983:197593090	ES,A5SS,	0.719	n/a
2:240929491|240946787	240939600:240939804	ES,	0.714	n/a
3:48215774|48219478	48215774:48215947	A3SS,	0.714	n/a
3:149563798|149639014	149613260:149613347	A5SS,	0.714	n/a
9:22046750|22097363	22096371:22096513	ES,	0.714	n/a
13:61013822|61034674	61018817:61018882	A3SS,	0.711	n/a
14:69583083|69589077	69585911:69585947	A5SS,	0.708	n/a
11:20424465|20448411	20426424:20426529	ES,	0.707	n/a
11:120345269|120348235	120348156:120348235	A3SS,	0.706	n/a
11:117023157|117034608	117030650:117030739	ES,	0.704	n/a
11:78176922|78189729	78189484:78189521	A3SS,	0.692	n/a
19:17387304|17387718	17387304:17387718	IR,	0.692	n/a
21:40600426|40601362	40601040:40601145	ES,	0.688	n/a
11:18022044|18031686	18031618:18031686	A5SS,	0.684	n/a
17:59853762|59857762	59855481:59855540	ES,	0.684	n/a
1:108724563|108728576	108727765:108727892	ES,A5SS,	0.68	n/a
13:45725822|45781640	45757536:45757613	ES,	0.676	n/a
1:176132005|176153828	176132951:176133027	A5SS,	0.667	n/a
12:32861087|32871697	32862478:32862541	ES,	0.667	n/a
12:109212025|109212334	109212212:109212334	A5SS,	0.667	n/a
14:97312432|97327072	97321561:97321689	A5SS,	0.667	n/a
16:21326632|21363459	21327228:21327291	A3SS,	0.667	n/a
19:33113328|33116872	33116671:33116872	A5SS,	0.667	n/a
19:33502585|33503630	33502791:33502849	ES,	0.667	n/a
22:40948110|40990739	40990678:40990739	A5SS,	0.667	n/a
3:122180071|122186276	122186169:122186276	A5SS,	0.667	n/a
7:105103068|105108910	105105760:105105855	A3SS,	0.667	n/a
2:211018219|211019335	211018219:211019335	IR,	0.66	n/a
9:33953283|33973235	33963724:33963789	ES,	0.654	n/a
11:86778736|86802437	86783945:86784012	ES,	0.65	n/a
10:99915850|99923154	99917220:99917330	ES,	0.647	n/a
13:45725822|45781640	45769477:45769650	ES,	0.647	n/a
17:27809215|27818883	27818802:27818883	A3SS,	0.647	n/a
1:52293468|52299842	52293468:52293541	A3SS,	0.643	n/a
5:122881111|122888841	122885922:122885996	ES,	0.636	n/a
9:88200378|88211364	88207475:88207619	A5SS,	0.636	n/a
19:4941540|4941943	4941540:4941943	IR,	0.629	n/a
12:109212025|109217137	109212208:109212334	A5SS,	0.625	n/a
2:176835492|176860374	176858873:176859008	A5SS,	0.625	n/a
13:33091994|33101669	33101545:33101669	A5SS,	0.623	n/a
5:109049221|109051965	109051861:109051965	A3SS,	0.615	n/a
12:116668338|116675510	116669864:116669961	ES,	0.608	n/a
1:212502477|212506940	212502477:212502673	A5SS,	0.6	n/a
5:138979957|138994551	138994424:138994551	A3SS,	0.6	n/a
9:111812563|111812972	111812563:111812708	A3SS,	0.6	n/a
X:106390973|106396733	106390973:106391039	A3SS,	0.6	n/a
7:11101418|11151094	11101418:11101468	A5SS,	0.595	n/a
7:17908030|17915413	17915292:17915413	A5SS,	0.591	n/a
3:72881520|72893574	72881520:72881632	A3SS,	0.588	n/a
22:46125305|46136418	46132848:46132963	ES,	0.586	n/a
7:77407655|77408131	77407951:77408131	A3SS,	0.586	n/a
2:75745182|75749613	75747320:75747394	ES,	0.585	n/a
1:51868107|51874004	51871577:51871780	ES,	0.583	n/a
2:183817133|183818059	183817841:183818059	A5SS,	0.583	n/a
3:31917925|31921322	31920922:31921045	ES,	0.575	n/a
15:72810408|72853890	72837161:72837305	ES,	0.571	n/a
22:34157358|34252790	34161831:34161940	ES,	0.571	n/a
3:15807741|15855816	15849160:15849235	ES,	0.571	n/a
6:42941741|42942776	42941741:42941843	A3SS,	0.571	n/a
13:113170754|113181798	113174200:113174335	ES,	0.561	n/a
3:142455221|142467302	142462327:142462428	ES,	0.559	n/a
11:85685751|85695016	85692915:85693046	A3SS,	0.558	n/a
1:77672325|77678032	77675590:77675638	ES,	0.556	n/a
1:231090079|231097049	231090079:231090149	A3SS,	0.545	n/a
2:99786013|99787892	99787802:99787892	A5SS,	0.541	n/a
17:53108529|53124515	53120597:53120686	A3SS,	0.538	n/a
5:132219032|132220811	132219811:132219880	ES,	0.538	n/a
6:17665470|17669777	17669206:17669259	ES,	0.533	n/a
3:98600384|98611450	98609236:98609300	ES,	0.532	n/a
7:64004085|64004810	64004684:64004810	A5SS,	0.532	n/a
19:5047487|5082515	5077378:5077481	ES,	0.524	n/a
11:61133517|61135470	61134900:61135470	A3SS,	0.523	n/a
X:53681007|53707139	53699463:53699541	ES,	0.52	n/a
5:138614016|138614818	138614254:138614429	ES,	0.519	n/a
1:51926763|51930998	51929679:51929736	ES,	0.5	n/a
1:77672325|77678032	77677905:77678032	A5SS,	0.5	n/a
1:77672325|77678032	77677980:77678032	A5SS,	0.5	n/a
13:99573208|99582511	99574695:99574763	ES,	0.5	n/a
14:97312432|97327072	97322467:97322587	ES,	0.5	n/a
15:100867581|100871259	100867581:100867679	A3SS,	0.5	n/a
15:100867581|100871259	100867581:100867674	A3SS,	0.5	n/a
22:47370186|47433094	47393530:47393605	ES,	0.5	n/a
3:52130585|52159197	52157549:52157615	ES,	0.5	n/a
5:179135240|179137066	179136874:179137066	A3SS,	0.5	n/a
5:179135240|179137066	179136920:179137066	A3SS,	0.5	n/a
6:107419755|107420500	107420096:107420191	ES,	0.5	n/a
9:34286615|34290387	34288361:34288482	ES,A5SS,	0.5	n/a
X:24190832|24197887	24191724:24191840	ES,	0.5	n/a
11:128993341|128997200	128993783:128993824	ES,	0.488	n/a
8:80182258|80201046	80194314:80194367	ES,	0.484	n/a
11:61133517|61135470	61135395:61135470	A3SS,	0.477	n/a
2:131829428|131840230	131829595:131829868	A3SS,	0.476	n/a
12:109046048|109048186	109046814:109046957	ES,	0.473	n/a
8:42761316|42785315	42783869:42783953	ES,	0.467	n/a
9:79852918|79853302	79852918:79853302	IR,	0.467	n/a
15:25650608|25657118	25652214:25652284	ES,A3SS,	0.462	n/a
17:53108529|53124515	53120619:53120686	A3SS,	0.462	n/a
2:99786013|99787892	99787806:99787892	A5SS,	0.459	n/a
11:128993341|128997200	128994183:128994290	ES,	0.458	n/a
1:231090079|231097049	231090079:231090124	A3SS,	0.455	n/a
7:22330794|22357656	22350165:22350219	ES,	0.455	n/a
3:80680382|80683122	80680887:80681005	ES,A5SS,	0.445	n/a
11:85685751|85695016	85692915:85693031	A3SS,	0.442	n/a
6:42941741|42942776	42941741:42941824	A3SS,	0.429	n/a
9:22046750|22097363	22063943:22064017	ES,	0.429	n/a
12:116534474|116549317	116547579:116547674	ES,	0.42	n/a
10:4872867|4884696	4883977:4884049	ES,	0.417	n/a
2:183817133|183818059	183817987:183818059	A5SS,	0.417	n/a
7:77407655|77408131	77407847:77408131	A3SS,	0.414	n/a
3:72881520|72893574	72881520:72881580	A3SS,	0.412	n/a
7:17908030|17915413	17915344:17915413	A5SS,	0.409	n/a
7:11101418|11151094	11101418:11101478	A5SS,	0.405	n/a
9:125042722|125054119	125048318:125048445	ES,	0.404	n/a
1:212502477|212506940	212502477:212502612	A5SS,	0.4	n/a
2:207144264|207162097	207145350:207145426	ES,	0.4	n/a
5:138979957|138994551	138994446:138994551	A3SS,	0.4	n/a
9:111812563|111812972	111812563:111812673	A3SS,	0.4	n/a
X:106390973|106396733	106390973:106391030	A3SS,	0.4	n/a
5:109049221|109051965	109051821:109051965	A3SS,	0.385	n/a
7:64004085|64004810	64004642:64004810	A5SS,	0.383	n/a
2:131829428|131840230	131829595:131829742	A3SS,	0.381	n/a
1:94107860|94140497	94132652:94132785	ES,	0.377	n/a
13:33091994|33101669	33101595:33101669	A5SS,	0.377	n/a
12:109212025|109217137	109212212:109212334	A5SS,	0.375	n/a
2:176835492|176860374	176858862:176859008	A5SS,	0.375	n/a
3:149563798|149639014	149619859:149619949	ES,	0.375	n/a
9:34286615|34290387	34288377:34288482	ES,A5SS,	0.375	n/a
2:207144264|207162097	207156738:207156840	ES,	0.372	n/a
2:68717322|68740812	68740212:68740359	ES,	0.371	n/a
9:88200378|88211364	88207588:88207619	A5SS,	0.364	n/a
1:180366651|180382606	180370846:180370915	ES,	0.362	n/a
1:52293468|52299842	52293468:52293558	A3SS,	0.357	n/a
1:180366651|180382606	180370657:180370754	ES,	0.354	n/a
17:27809215|27818883	27818828:27818883	A3SS,	0.353	n/a
1:176132005|176153828	176132963:176133027	A5SS,	0.333	n/a
12:109212025|109212334	109212208:109212334	A5SS,	0.333	n/a
14:62188227|62188541	62188227:62188541	IR,	0.333	n/a
14:71880665|71996087	71970329:71970385	ES,	0.333	n/a
14:97312432|97327072	97321561:97321693	A5SS,	0.333	n/a
16:21326632|21363459	21327205:21327291	A3SS,	0.333	n/a
19:33113328|33116872	33116780:33116872	A5SS,	0.333	n/a
2:45773871|45789895	45778264:45778421	ES,	0.333	n/a
22:40948110|40990739	40990687:40990739	A5SS,	0.333	n/a
3:122180071|122186276	122186093:122186276	A5SS,	0.333	n/a
7:99709351|99709876	99709351:99709622	IR,	0.333	n/a
7:105103068|105108910	105105760:105105861	A3SS,	0.333	n/a
9:102677460|102691125	102684484:102684577	ES,	0.333	n/a
9:33953283|33963789	33956077:33956144	ES,	0.331	n/a
11:18022044|18031686	18031622:18031686	A5SS,	0.316	n/a
16:29917109|29917448	29917109:29917448	IR,	0.314	n/a
2:64083440|64085070	64084684:64084852	ES,	0.312	n/a
11:78176922|78189729	78189484:78189516	A3SS,	0.308	n/a
2:9419446|9437574	9427133:9427241	ES,	0.304	n/a
13:31789188|31803431	31797578:31797650	ES,	0.296	n/a
7:27668990|27689252	27676295:27676356	ES,	0.295	n/a
11:120345269|120348235	120348194:120348235	A3SS,	0.294	n/a
14:69583083|69589077	69585886:69585947	A5SS,	0.292	n/a
13:61013822|61034674	61018821:61018882	A3SS,	0.289	n/a
2:207144264|207162097	207145274:207145317	ES,	0.288	n/a
3:48215774|48219478	48215774:48215906	A3SS,	0.286	n/a
3:149563798|149639014	149613260:149613357	A5SS,	0.286	n/a
6:150092298|150094305	150093691:150093820	ES,	0.279	n/a
12:116674626|116675510	116674962:116675078	ES,	0.273	n/a
14:73614503|73614814	73614503:73614814	IR,	0.273	n/a
15:25650608|25660989	25652214:25652284	ES,	0.273	n/a
7:98513346|98515302	98513346:98513454	A5SS,	0.273	n/a
9:102814699|102822454	102816319:102816449	ES,	0.273	n/a
6:167435897|167438382	167435897:167436119	A5SS,	0.269	n/a
15:25650608|25657118	25653767:25653831	ES,	0.268	n/a
19:5047487|5082515	5071021:5071070	ES,	0.263	n/a
12:116668238|116675510	116674626:116674695	ES,	0.259	n/a
3:52946554|52950230	52946554:52946663	A3SS,	0.254	n/a
11:47650505|47652639	47650505:47650575	A3SS,	0.25	n/a
19:19750894|19751380	19751105:19751380	IR,	0.25	n/a
21:46538479|46554747	46540709:46540874	ES,	0.25	n/a
4:106367540|106377902	106377405:106377448	ES,	0.25	n/a
16:31733947|31734674	31734382:31734674	A3SS,	0.238	n/a
7:35006506|35029553	35028967:35029059	ES,	0.238	n/a
3:138289160|138291774	138289876:138289976	A3SS,	0.234	n/a
12:116668238|116675510	116669864:116669961	ES,	0.233	n/a
11:128993341|128994789	128994183:128994348	ES,A3SS,	0.231	n/a
20:56993267|57014081	57007403:57007472	ES,	0.231	n/a
2:225400245|225422573	225421012:225421161	ES,A3SS,	0.227	n/a
1:41578955|41582682	41578955:41579225	A3SS,	0.222	n/a
17:59853762|59857762	59853762:59853923	A3SS,	0.222	n/a
7:22347958|22357656	22350165:22350219	ES,	0.222	n/a
10:96201653|96234540	96204228:96204296	ES,	0.22	n/a
3:197592294|197602646	197592983:197593094	ES,A5SS,	0.219	n/a
3:197592294|197602646	197597113:197597149	A3SS,	0.219	n/a
2:168869144|168873605	168872985:168873446	A3SS,	0.214	n/a
2:169018297|169038600	169023809:169023913	A3SS,	0.211	n/a
17:47388674|47390207	47390064:47390207	A5SS,	0.2	n/a
3:52946554|52947633	52946554:52946638	A3SS,	0.2	n/a
3:196802708|196846401	196803457:196803556	ES,	0.2	n/a
9:33960824|33973235	33971649:33971735	A3SS,	0.2	n/a
7:98988516|98988876	98988516:98988672	A5SS,	0.197	n/a
9:125042722|125054119	125048059:125048225	ES,	0.19	n/a
11:128963516|128994789	128994183:128994290	ES,	0.189	n/a
12:70193989|70195501	70193989:70194112	A5SS,	0.188	n/a
1:23356962|23377013	23370920:23370979	ES,	0.186	n/a
10:96201653|96234540	96203085:96203180	ES,	0.185	n/a
17:78681641|78682914	78682713:78682914	A3SS,	0.182	n/a
2:225400245|225422573	225421012:225421137	ES,A3SS,	0.182	n/a
7:77214860|77230123	77230070:77230123	A3SS,	0.182	n/a
2:61749746|61761038	61752405:61752468	ES,	0.18	n/a
2:191774989|191778090	191777897:191778090	A3SS,	0.178	n/a
7:104678573|104681470	104679600:104679716	ES,	0.171	n/a
10:74474869|74475660	74475612:74475660	A3SS,	0.167	n/a
11:122646927|122647918	122646927:122646984	A5SS,	0.167	n/a
18:12698978|12701112	12698978:12699202	A3SS,	0.167	n/a
20:56993267|57014081	57006515:57006573	ES,	0.167	n/a
3:196842798|196846401	196842798:196842895	A3SS,	0.162	n/a
11:65661485|65664477	65661485:65661587	A3SS,	0.152	n/a
20:10536879|10541468	10541352:10541468	A3SS,	0.15	n/a
20:10536879|10541468	10541089:10541139	ES,	0.15	n/a
2:131829428|131840230	131829595:131829827	A3SS,	0.143	n/a
6:16586011|16658132	16589711:16589744	ES,	0.143	n/a
2:36668401|36669878	36668401:36668624	A5SS,	0.138	n/a
2:36668401|36669878	36669823:36669878	A3SS,	0.138	n/a
10:96201653|96234540	96218237:96218352	ES,	0.135	n/a
2:64083440|64085070	64083922:64084016	ES,	0.135	n/a
10:96201653|96234540	96207392:96207427	ES,	0.13	n/a
17:44159807|44172067	44159807:44159898	A3SS,	0.13	n/a
2:61722590|61726048	61725808:61725874	A3SS,	0.13	n/a
20:30954187|30956926	30954187:30954255	A5SS,	0.13	n/a
20:30954187|30956926	30956816:30956926	A3SS,	0.13	n/a
11:128993341|129034322	128994183:128994348	ES,	0.127	n/a
3:196812451|196846401	196842798:196842895	A3SS,	0.125	n/a
14:71880665|71996087	71995416:71995457	ES,	0.123	n/a
2:175779786|175816930	175782053:175782159	ES,	0.12	n/a
1:9991949|9995685	9991949:9992020	A3SS,	0.118	n/a
7:74119496|74133260	74129177:74129236	ES,	0.117	n/a
3:149563798|149639014	149638976:149639014	A3SS,	0.116	n/a
15:80412670|80415142	80414090:80414162	A3SS,	0.114	n/a
1:247320302|247323115	247320302:247320423	A3SS,	0.111	n/a
12:122973933|122977336	122975482:122975560	ES,	0.111	n/a
15:72300167|72320134	72302720:72302788	A5SS,	0.111	n/a
5:52942063|52954454	52944124:52944246	ES,	0.111	n/a
5:79498705|79501179	79501045:79501179	A5SS,	0.111	n/a
7:63796637|63797360	63797282:63797360	A3SS,	0.111	n/a
3:80680382|80683122	80680859:80681005	ES,A5SS,	0.109	n/a
20:30954187|30978970	30959581:30959677	ES,	0.105	n/a
13:47297356|47308133	47301683:47301791	ES,	0.103	n/a
15:90414707|90432372	90421497:90421532	ES,	0.1	n/a
16:27224906|27226329	27224906:27225092	A5SS,	0.1	n/a
2:61749746|61753656	61752177:61752238	ES,	0.1	n/a
17:1746097|1756483	1748268:1748360	ES,	0.099	n/a
2:197777606|197787849	197787822:197787849	A5SS,	0.098	n/a
9:96233423|96238620	96236515:96236612	ES,	0.095	n/a
6:159004986|159010814	159010680:159010814	A3SS,	0.092	n/a
2:159922408|159954346	159932987:159933040	ES,	0.091	n/a
2:225400245|225422573	225421012:225421106	ES,A3SS,	0.091	n/a
3:31917925|31921322	31918172:31918236	ES,	0.089	n/a
2:58449077|58459247	58456949:58456990	A3SS,	0.086	n/a
9:33953283|33973235	33971649:33971735	A3SS,	0.086	n/a
7:64004085|64004810	64004455:64004810	A5SS,	0.085	n/a
1:108724563|108728576	108727838:108727892	ES,A5SS,	0.08	n/a
8:131164982|131181313	131179782:131179859	A3SS,	0.08	n/a
7:22347958|22357656	22357631:22357656	A5SS,	0.077	n/a
12:111991962|111993723	111992670:111992873	A3SS,	0.072	n/a
12:116534474|116549317	116547846:116548064	ES,	0.072	n/a
10:74100547|74100928	74100547:74100660	A3SS,	0.07	n/a
20:10536879|10541468	10537967:10538074	ES,	0.07	n/a
7:27668990|27689252	27688167:27688263	ES,	0.065	n/a
5:141836545|141847396	141842759:141842904	ES,	0.062	n/a
6:38050168|38084515	38052698:38052767	ES,	0.061	n/a
2:64083440|64085070	64084098:64084136	ES,	0.059	n/a
1:51926763|51930998	51929321:51929470	A5SS,	0.054	n/a
3:196118684|196129890	196120421:196120490	A5SS,	0.054	n/a
15:100794341|100871259	100821434:100821601	A3SS,	0.053	n/a
17:722679|729318	723343:723440	ES,	0.05	n/a
4:151509200|151520283	151518235:151518267	ES,	0.05	n/a
3:157839892|157841780	157841661:157841780	A3SS,	0.049	n/a
13:114174931|114193822	114188451:114188555	A3SS,	0.048	n/a
5:170610199|170632616	170626685:170626777	A3SS,	0.045	n/a
5:170610199|170632616	170610326:170610439	A5SS,	0.045	n/a
9:114148657|114154104	114151836:114151907	A3SS,	0.045	n/a
3:196807922|196846401	196842798:196842895	A3SS,	0.041	n/a
2:61749746|61761038	61752627:61752727	ES,	0.04	n/a
11:118425174|118430579	118428176:118428239	ES,	0.037	n/a
2:240929491|240946787	240945165:240945258	ES,	0.037	n/a
12:116534474|116549317	116547183:116547306	ES,	0.034	n/a
9:33971649|33973235	33971649:33971735	A3SS,	0.033	n/a
14:102506573|102507010	102506573:102506776	A5SS,	0.032	n/a
2:175779786|175816930	175805544:175805622	ES,	0.032	n/a
9:33351558|33352717	33352648:33352717	A3SS,	0.032	n/a
9:33351558|33352717	33351558:33351792	A5SS,	0.032	n/a
3:196831774|196846401	196842798:196842895	A3SS,	0.031	n/a
14:81362062|81372425	81372304:81372425	A5SS,	0.03	n/a
2:9419446|9437574	9419446:9419649	A5SS,	0.03	n/a
5:95091100|95099324	95091100:95091245	A5SS,	0.028	n/a
17:53478830|53481229	53479527:53479664	A5SS,	0.025	n/a
3:98568305|98600611	98595511:98595555	ES,	0.022	n/a
2:61749746|61761038	61752177:61752238	ES,	0.021	n/a
5:137320946|137324004	137320946:137321045	A3SS,	0.021	n/a
2:169018297|169038600	169021781:169021806	ES,	0.016	n/a
1:180366651|180382606	180375402:180375553	ES,	0.015	n/a
13:61013822|61041513	61018821:61018882	A3SS,	0.015	n/a
2:58449077|58459247	58449077:58449173	A3SS,	0.013	n/a
21:16386665|16415895	16412684:16412737	ES,	0.013	n/a
17:29483001|29497015	29491067:29491097	ES,	0.01	n/a
21:16386665|16415895	16415576:16415705	ES,	0.003	n/a

## Sheet: SRR5889363_SW620_rep1
circRNA_id	alternatively_spliced_exon	AS_type	psi_estimation_without_correction	psi_estimation_after_correction
1:32745272|32745811	32745442:32745595	A3SS,	1	n/a
1:120277257|120279889	120277918:120278066	A5SS,	1	n/a
1:214068006|214139627	214068737:214068861	A5SS,	1	n/a
1:217665022|217688231	217665986:217666035	ES,	1	n/a
10:74474869|74475660	74475520:74475660	A3SS,	1	n/a
10:114286846|114298089	114296362:114296460	ES,	1	n/a
10:120445495|120446153	120445495:120445680	A3SS,	1	n/a
10:124151819|124159904	124151819:124151888	A5SS,	1	n/a
11:18022044|18031686	18031622:18031686	A5SS,	1	n/a
11:85692788|85695016	85692915:85693031	A3SS,	1	n/a
12:48482584|48495299	48491777:48491907	ES,	1	n/a
12:110729825|110734542	110729825:110729929	A5SS,	1	n/a
12:116674626|116675510	116674962:116675078	ES,	1	n/a
12:122181535|122199644	122190034:122190129	ES,	1	n/a
13:51501543|51523641	51503611:51503718	A3SS,	1	n/a
13:52992127|53001354	52997709:52997774	ES,	1	n/a
13:76287318|76335174	76287318:76287388	A5SS,	1	n/a
13:103275227|103279516	103275227:103275390	A5SS,	1	n/a
13:103275227|103280274	103275227:103275390	A5SS,	1	n/a
13:113170754|113181798	113174200:113174335	A3SS,	1	n/a
14:71880665|71996087	71884847:71884913	ES,	1	n/a
15:89790860|89804074	89790860:89790962	A5SS,	1	n/a
15:94899366|94945248	94899366:94899530	A5SS,	1	n/a
16:72556452|72604414	72574477:72574568	A3SS,	1	n/a
16:72651082|72651452	72651233:72651452	A5SS,	1	n/a
16:72651082|72651452	72651082:72651136	A3SS,	1	n/a
16:85810161|85814886	85813985:85814079	A3SS,	1	n/a
16:88008654|88014733	88008654:88008791	A5SS,	1	n/a
16:89484692|89497734	89497664:89497734	A5SS,	1	n/a
16:89824985|89828430	89824985:89825113	A3SS,	1	n/a
17:4192525|4200104	4192525:4192703	A3SS,	1	n/a
17:4192525|4200109	4192525:4192703	A3SS,	1	n/a
17:7402358|7402810	7402358:7402482	A5SS,	1	n/a
17:27809215|27818883	27818802:27818883	A3SS,	1	n/a
17:46189393|46190763	46189393:46189473	A5SS,	1	n/a
17:58711214|58713381	58711214:58711338	A5SS,	1	n/a
17:64509454|64510584	64510406:64510584	A3SS,	1	n/a
17:80828100|80869665	80858527:80858607	ES,	1	n/a
19:10264969|10265732	10264969:10265039	A3SS,	1	n/a
2:58425714|58459247	58449077:58449177	A3SS,	1	n/a
2:58425729|58459247	58449077:58449177	A3SS,	1	n/a
2:71623271|71645769	71635252:71635377	ES,	1	n/a
2:122260743|122287901	122273241:122273338	ES,	1	n/a
2:122514816|122516382	122514816:122515010	A5SS,	1	n/a
2:179400459|179407088	179402331:179402418	A3SS,	1	n/a
2:240944627|240951113	240945165:240945258	ES,	1	n/a
20:35693827|35696589	35695127:35695287	ES,	1	n/a
20:49557402|49571822	49557402:49557495	A3SS,	1	n/a
21:45323838|45324333	45324120:45324333	A3SS,	1	n/a
3:56661065|56662642	56661065:56661173	A3SS,	1	n/a
3:138289160|138291774	138289160:138289340	A3SS,	1	n/a
3:138289160|138291826	138289160:138289340	A3SS,	1	n/a
3:155611307|155616629	155616529:155616629	A3SS,	1	n/a
3:195435005|195435712	195435005:195435306	A5SS,	1	n/a
3:197592294|197602646	197592983:197593090	ES,	1	n/a
4:3088666|3109150	3101001:3101121	A3SS,	1	n/a
4:26638833|26668027	26667955:26668027	A3SS,	1	n/a
4:78694235|78697546	78695684:78695870	A3SS,	1	n/a
4:148827789|148876525	148827789:148827870	A5SS,	1	n/a
5:138979957|139003046	138994171:138994202	ES,	1	n/a
6:150092298|150094305	150093691:150093820	ES,	1	n/a
6:167435897|167438382	167435897:167436123	A5SS,	1	n/a
6:167435897|167440103	167435897:167436123	A5SS,	1	n/a
6:167435897|167447459	167435897:167436123	A5SS,	1	n/a
7:74119496|74133260	74120721:74120764	ES,	1	n/a
8:48203622|48206619	48203622:48203801	A5SS,	1	n/a
8:103846417|103848618	103846417:103846491	A3SS,	1	n/a
9:33953283|33973235	33971649:33971752	A3SS,	1	n/a
9:135517391|135527879	135526462:135526503	ES,	1	n/a
X:102094729|102120080	102094729:102094900	A5SS,	1	n/a
2:58449077|58459247	58449077:58449177	A3SS,	0.995	n/a
5:137320946|137324004	137323150:137323305	A3SS,	0.993	n/a
5:353845|376831	376725:376831	A3SS,	0.992	n/a
12:120592774|120593523	120593045:120593234	ES,	0.988	n/a
7:43679048|43680248	43680172:43680248	A5SS,	0.987	n/a
2:61749746|61761038	61753555:61753656	A5SS,	0.986	n/a
7:158580695|158591763	158590633:158590767	ES,	0.985	n/a
1:247318868|247323115	247318868:247318997	A3SS,	0.983	n/a
20:33954360|33971936	33969721:33969828	ES,	0.983	n/a
7:158580695|158591763	158580695:158580784	A3SS,	0.983	n/a
7:64004085|64004810	64004684:64004810	A5SS,	0.972	n/a
22:25771780|25777545	25771780:25771975	A3SS,	0.97	n/a
6:159001972|159010814	159010704:159010814	A3SS,	0.97	n/a
13:113845186|113854830	113854741:113854830	A5SS,	0.969	n/a
3:57875768|57882659	57881974:57882098	ES,	0.969	n/a
19:39408364|39409453	39409062:39409170	A3SS,	0.968	n/a
12:51402259|51404549	51402259:51402407	A3SS,	0.964	n/a
9:95030456|95032265	95032167:95032265	A5SS,	0.962	n/a
12:28458582|28460682	28459675:28459878	A3SS,	0.958	n/a
9:114148657|114154104	114152264:114152381	A3SS,	0.957	n/a
6:159004986|159010814	159010704:159010814	A3SS,	0.956	n/a
17:4186093|4200109	4192525:4192703	A3SS,	0.955	n/a
7:128655033|128658211	128658011:128658211	A5SS,	0.955	n/a
10:5836848|5842668	5838726:5838825	A5SS,	0.952	n/a
11:62406455|62407203	62406455:62406582	A3SS,	0.952	n/a
21:16386665|16415895	16387466:16387546	ES,	0.951	n/a
2:240078348|240085619	240085499:240085619	A5SS,	0.946	n/a
6:158994452|159010814	159010704:159010814	A3SS,	0.944	n/a
20:10536879|10541468	10541348:10541468	A3SS,	0.941	n/a
13:61013822|61041513	61018817:61018882	A3SS,	0.94	n/a
1:52959283|52975384	52962678:52962855	ES,	0.939	n/a
3:196842798|196846401	196842798:196842954	A3SS,	0.938	n/a
2:175779786|175816930	175809898:175809989	ES,	0.933	n/a
9:96233423|96261168	96233423:96233669	A5SS,	0.933	n/a
6:158850768|158852695	158852616:158852695	A3SS,	0.929	n/a
15:76584772|76588078	76584960:76585041	ES,	0.925	n/a
12:49333438|49334971	49333780:49333890	ES,	0.923	n/a
21:38792601|38802702	38797992:38798083	ES,	0.923	n/a
16:69404386|69406258	69404386:69404532	A3SS,	0.92	n/a
19:19756683|19757156	19756683:19756794	A3SS,	0.917	n/a
19:19756683|19757156	19757014:19757156	A5SS,	0.917	n/a
8:97318672|97343323	97332474:97332573	ES,	0.917	n/a
4:185637551|185638350	185637551:185637787	A3SS,	0.913	n/a
9:20819795|20823114	20820940:20821070	A5SS,	0.913	n/a
3:196831774|196846401	196842798:196842954	A3SS,	0.91	n/a
1:171492360|171496983	171492574:171492661	A3SS,	0.909	n/a
12:47497896|47501947	47499831:47499907	ES,	0.909	n/a
19:30471066|30477324	30471066:30471157	A5SS,	0.909	n/a
2:109463194|109473426	109473250:109473426	A3SS,	0.909	n/a
2:58311224|58316858	58312016:58312085	A5SS,	0.905	n/a
21:38792601|38802702	38794076:38794168	ES,	0.905	n/a
X:322140|323067	322990:323067	A5SS,	0.905	n/a
11:46098305|46113774	46112006:46112117	ES,	0.901	n/a
12:100598718|100601564	100599454:100599522	A5SS,	0.9	n/a
14:23375404|23380612	23375404:23375577	A3SS,	0.9	n/a
19:13039156|13039661	13039349:13039477	A5SS,	0.9	n/a
1:92798948|92829327	92798948:92799030	A5SS,	0.889	n/a
12:109212025|109217137	109212212:109212334	A5SS,	0.889	n/a
12:117476788|117484643	117484582:117484643	A5SS,	0.889	n/a
21:26793020|26796961	26793821:26793977	A3SS,	0.889	n/a
6:159001972|159010814	159004986:159005076	ES,	0.885	n/a
9:33953283|33973235	33963724:33963789	ES,	0.882	n/a
7:99621042|99621930	99621042:99621555	IR,	0.878	n/a
2:197777606|197787849	197786827:197786910	A3SS,	0.875	n/a
20:47591303|47592736	47591303:47591411	A5SS,	0.875	n/a
3:113207792|113218429	113212896:113212989	A3SS,	0.875	n/a
5:38991051|39003724	38996921:38996984	ES,	0.875	n/a
15:90414707|90432372	90420538:90420656	ES,	0.872	n/a
13:61013822|61034674	61018817:61018882	A3SS,	0.871	n/a
2:234296903|234299129	234298575:234298687	ES,A3SS,	0.871	n/a
2:61749746|61753656	61752405:61752468	ES,	0.87	n/a
7:138951079|138957186	138954140:138954269	A3SS,	0.87	n/a
17:80828100|80858607	80847544:80847573	ES,	0.867	n/a
21:26825503|26838789	26825503:26825738	A3SS,	0.867	n/a
7:77407655|77408131	77407951:77408131	A3SS,	0.867	n/a
1:92798948|92846430	92798948:92799030	A5SS,	0.859	n/a
11:128993341|129034322	128993783:128993824	ES,	0.858	n/a
10:75264608|75265184	75265081:75265184	A5SS,	0.857	n/a
10:99236440|99238146	99236592:99236720	A5SS,	0.857	n/a
19:17387304|17387718	17387604:17387718	A3SS,	0.857	n/a
7:27668990|27689252	27671955:27672064	A3SS,	0.857	n/a
9:34286615|34290387	34288361:34288477	ES,A5SS,	0.857	n/a
X:24521444|24523415	24521444:24521662	A5SS,	0.857	n/a
1:9991949|9994918	9994820:9994918	A5SS,	0.85	n/a
4:79186179|79188586	79187988:79188089	A5SS,	0.85	n/a
7:152007051|152012423	152008883:152009031	A5SS,	0.85	n/a
6:158994452|159010814	159004986:159005076	ES,	0.841	n/a
17:80842021|80861354	80858527:80858607	ES,	0.839	n/a
12:116668238|116675510	116674626:116674695	ES,	0.833	n/a
17:80842021|80851508	80847544:80847625	A5SS,	0.833	n/a
2:70451686|70456450	70452460:70452525	ES,	0.833	n/a
X:71681854|71684581	71681854:71681948	A3SS,	0.833	n/a
4:1219148|1235307	1231971:1232125	ES,	0.826	n/a
16:87782279|87795646	87790005:87790083	ES,A5SS,	0.824	n/a
17:1746097|1747980	1747214:1747292	A5SS,	0.824	n/a
9:33971649|33973235	33971649:33971752	A3SS,	0.824	n/a
15:50592986|50593565	50593418:50593565	A5SS,	0.818	n/a
22:46085592|46098727	46088876:46088958	ES,	0.818	n/a
6:30618771|30619243	30618771:30618877	A5SS,	0.812	n/a
X:130917915|130919286	130919185:130919286	A5SS,	0.812	n/a
17:80858527|80869665	80861281:80861354	ES,	0.81	n/a
3:98600384|98611450	98609236:98609300	ES,	0.81	n/a
1:92798948|92823600	92823114:92823189	A5SS,	0.8	n/a
1:235505023|235506198	235505326:235505641	A5SS,	0.8	n/a
11:65661485|65664477	65661485:65661592	A3SS,	0.8	n/a
11:85692172|85695016	85692915:85693046	A3SS,	0.8	n/a
17:37437642|37441826	37438886:37439108	A5SS,	0.8	n/a
3:41746549|41759353	41746549:41746643	A3SS,	0.8	n/a
3:56600622|56601081	56600622:56600768	A5SS,	0.8	n/a
6:149899958|149901859	149899958:149900109	A5SS,	0.8	n/a
6:155095123|155116273	155108995:155109156	ES,	0.8	n/a
7:158528194|158531812	158529739:158529870	A3SS,	0.8	n/a
9:134518626|134526336	134525516:134525629	ES,	0.8	n/a
X:16685637|16701349	16696485:16696573	ES,	0.8	n/a
11:86778736|86802437	86786679:86786828	ES,	0.798	n/a
12:70671912|70704797	70688017:70688074	ES,A3SS,	0.794	n/a
1:231090079|231097049	231092167:231092228	A3SS,	0.789	n/a
10:5827105|5842668	5836848:5836982	ES,	0.789	n/a
X:16685637|16701349	16688703:16688797	ES,	0.789	n/a
17:80842021|80869665	80858527:80858607	ES,	0.786	n/a
19:50902108|50902741	50902628:50902741	A3SS,	0.786	n/a
3:52946554|52950230	52946554:52946663	A3SS,	0.78	n/a
14:50130033|50141145	50136242:50136316	A3SS,	0.778	n/a
19:3660964|3661999	3660964:3661081	A3SS,	0.765	n/a
21:38792601|38802702	38801169:38801210	ES,	0.765	n/a
12:111991962|111993723	111992670:111992878	A3SS,	0.762	n/a
1:231090079|231097049	231090079:231090149	A3SS,	0.758	n/a
1:27269151|27269556	27269151:27269287	A5SS,	0.75	n/a
1:28365350|28369161	28368818:28368919	A3SS,	0.75	n/a
1:77672325|77678032	77677980:77678032	A5SS,	0.75	n/a
10:61844360|61845011	61844915:61845011	A5SS,	0.75	n/a
10:70246901|70253327	70248224:70248386	ES,	0.75	n/a
11:581492|587464	581492:581606	A5SS,	0.75	n/a
11:17899755|18031686	18010144:18010222	ES,	0.75	n/a
11:78176922|78189729	78189484:78189521	A3SS,	0.75	n/a
12:22796697|22826594	22821532:22821656	A5SS,	0.75	n/a
12:32861087|32871697	32862478:32862541	ES,	0.75	n/a
15:25650608|25660989	25660862:25660989	A5SS,	0.75	n/a
15:64410316|64415745	64410987:64411053	A3SS,	0.75	n/a
16:31733947|31734674	31734382:31734674	A3SS,	0.75	n/a
19:58755331|58758160	58758077:58758160	A3SS,	0.75	n/a
2:61339657|61345251	61340905:61340989	ES,	0.75	n/a
2:240078348|240158360	240085499:240085619	A5SS,	0.75	n/a
3:52946554|52947633	52946554:52946663	A3SS,	0.75	n/a
3:184603898|184618760	184611022:184611200	ES,	0.75	n/a
5:138614016|138614818	138614254:138614429	ES,	0.75	n/a
9:101542471|101544855	101542471:101542619	A3SS,	0.75	n/a
9:136671203|136677338	136672380:136672448	ES,	0.75	n/a
9:103065914|103072661	103070782:103070963	IR,	0.739	n/a
17:59853762|59857762	59855481:59855540	ES,	0.737	n/a
10:105197772|105198565	105197968:105198050	ES,	0.733	n/a
12:19615444|19626289	19619682:19619784	ES,	0.733	n/a
20:33065577|33067594	33067435:33067594	A3SS,	0.733	n/a
2:201721405|201721708	201721405:201721708	IR,	0.727	n/a
7:156549087|156619438	156589083:156589186	ES,	0.727	n/a
2:225400245|225422573	225421012:225421137	ES,A3SS,	0.722	n/a
16:68300496|68309152	68307721:68307807	ES,A3SS,	0.718	n/a
1:47761437|47767420	47765782:47765824	ES,	0.714	n/a
10:123718839|123721032	123719016:123719110	ES,	0.714	n/a
20:13550154|13561628	13553208:13553329	ES,	0.714	n/a
20:43034698|43036115	43036021:43036115	A3SS,	0.714	n/a
3:52156395|52159197	52157549:52157615	A5SS,	0.714	n/a
7:1937836|2041756	1976323:1976533	ES,	0.714	n/a
8:37623044|37623873	37623044:37623264	IR,	0.714	n/a
11:85692788|85701442	85694909:85695016	ES,	0.7	n/a
16:88008654|88017865	88008654:88008791	A5SS,	0.7	n/a
17:59853762|59857762	59853762:59853923	A3SS,	0.7	n/a
4:139988838|139994721	139993020:139993193	A3SS,	0.7	n/a
19:4941540|4941943	4941540:4941943	IR,	0.695	n/a
12:70193989|70195501	70193989:70194117	A5SS,	0.694	n/a
11:78176922|78204241	78189631:78189729	ES,	0.692	n/a
11:85685751|85695016	85692915:85693046	A3SS,	0.692	n/a
19:10368898|10369361	10369089:10369361	IR,	0.692	n/a
6:34935016|34937943	34935447:34935536	ES,	0.692	n/a
7:6472468|6476164	6474393:6474651	ES,A5SS,	0.692	n/a
9:125042722|125054119	125048318:125048445	ES,	0.68	n/a
10:126727566|126799662	126763312:126763412	ES,	0.667	n/a
11:128993341|128997200	128993783:128993824	ES,	0.667	n/a
12:133291444|133294706	133294573:133294706	A3SS,	0.667	n/a
14:74370663|74371786	74371605:74371786	A3SS,	0.667	n/a
14:92559596|92563182	92560090:92560175	ES,	0.667	n/a
16:21350242|21363459	21353829:21353907	ES,	0.667	n/a
17:4186093|4210418	4200012:4200109	ES,A3SS,	0.667	n/a
18:697240|706578	697240:697355	A3SS,	0.667	n/a
18:54291519|54293688	54293393:54293497	A3SS,	0.667	n/a
2:99786013|99787892	99787806:99787892	A5SS,	0.667	n/a
20:33057853|33069011	33065577:33065711	A5SS,	0.667	n/a
20:33065577|33067594	33065577:33065665	A5SS,	0.667	n/a
22:41349559|41360121	41351291:41351450	ES,	0.667	n/a
3:51504945|51530796	51526405:51526504	A3SS,	0.667	n/a
3:133894453|133914026	133894774:133894883	A5SS,	0.667	n/a
6:74190398|74191967	74191752:74191967	A3SS,	0.667	n/a
6:139264650|139265759	139265635:139265759	A5SS,	0.667	n/a
7:16720926|16729531	16725530:16725665	ES,A3SS,	0.667	n/a
7:33185854|33217203	33192313:33192463	A5SS,	0.667	n/a
7:56049903|56052571	56052540:56052571	A3SS,	0.667	n/a
9:115024715|115060196	115060112:115060196	A5SS,	0.667	n/a
X:16875717|16881223	16876799:16876972	ES,	0.667	n/a
9:33953283|33963789	33956077:33956144	ES,	0.659	n/a
13:33091994|33101669	33101545:33101669	A5SS,	0.657	n/a
1:59805630|59844509	59810670:59810718	ES,	0.652	n/a
20:10536879|10541468	10541089:10541139	ES,A5SS,	0.647	n/a
14:23375404|23380612	23378692:23378804	ES,A5SS,	0.643	n/a
12:72163580|72167802	72165885:72166008	ES,	0.636	n/a
14:71880665|71996087	71970329:71970385	ES,	0.636	n/a
17:4186093|4210418	4192525:4192703	ES,	0.636	n/a
17:80842021|80869665	80851423:80851508	ES,	0.636	n/a
9:128057737|128061385	128059708:128059799	ES,	0.636	n/a
X:24190832|24197887	24193506:24193560	ES,	0.636	n/a
1:247320302|247323115	247320302:247320519	A3SS,	0.634	n/a
8:141856359|141900868	141889570:141889736	ES,	0.63	n/a
11:20424465|20448411	20424465:20424530	A5SS,	0.629	n/a
1:213037067|213046160	213037735:213037861	ES,	0.6	n/a
1:214089278|214139627	214110597:214110764	ES,	0.6	n/a
11:102056749|102076805	102056749:102056868	A5SS,	0.6	n/a
12:27199091|27219159	27213760:27213926	ES,	0.6	n/a
14:45623900|45628483	45628299:45628483	A3SS,	0.6	n/a
16:74972048|74976724	74972048:74972164	A3SS,	0.6	n/a
17:80842021|80869665	80847544:80847573	ES,	0.6	n/a
19:21280991|21281716	21281266:21281349	ES,	0.6	n/a
19:39408364|39409453	39408734:39408779	ES,	0.6	n/a
2:131829428|131840230	131829595:131829868	A3SS,	0.6	n/a
2:240944627|240946787	240944973:240945067	ES,	0.6	n/a
21:38792601|38845182	38794076:38794168	ES,	0.6	n/a
22:30366965|30375041	30367882:30368039	ES,	0.6	n/a
3:129684544|129690951	129690830:129690951	A5SS,	0.6	n/a
6:86267694|86284096	86275050:86275137	ES,	0.6	n/a
6:107419755|107420500	107420096:107420138	ES,	0.6	n/a
8:37967897|37968351	37967897:37968082	A5SS,	0.6	n/a
X:71681854|71684581	71682212:71682292	ES,	0.6	n/a
X:106387026|106396733	106394086:106394197	ES,	0.6	n/a
3:11641366|11643496	11641366:11641403	A3SS,	0.588	n/a
19:17387304|17387718	17387304:17387718	IR,	0.586	n/a
13:80094945|80113910	80107458:80107591	A3SS,	0.583	n/a
11:78176922|78204241	78189484:78189521	ES,	0.579	n/a
5:132219032|132220811	132219811:132219880	ES,	0.579	n/a
10:99915850|99923154	99917220:99917330	ES,	0.571	n/a
12:69090631|69096564	69094506:69094633	A5SS,	0.571	n/a
12:117513076|117513606	117513449:117513606	A5SS,	0.571	n/a
15:76566753|76588078	76584960:76585041	ES,	0.571	n/a
3:138289160|138290198	138289160:138289368	A3SS,	0.571	n/a
8:28595036|28600731	28600603:28600731	A3SS,	0.571	n/a
15:69728477|69729061	69728903:69729061	A3SS,	0.565	n/a
12:76844631|76881398	76844631:76844768	A3SS,	0.556	n/a
16:68900982|68914533	68912021:68912183	ES,	0.556	n/a
16:70548238|70551643	70549771:70549943	ES,	0.556	n/a
2:201881714|201887655	201886782:201886837	ES,	0.556	n/a
3:128514203|128516912	128515988:128516061	ES,	0.556	n/a
5:74109665|74137504	74130251:74130422	ES,	0.556	n/a
7:11101418|11151094	11101418:11101468	A5SS,	0.556	n/a
13:111274563|111279894	111277537:111277650	ES,A5SS,	0.545	n/a
1:155891166|155891709	155891166:155891318	A3SS,	0.538	n/a
1:197641167|197643299	197642905:197642977	ES,	0.538	n/a
2:45773871|45789895	45778264:45778421	ES,	0.538	n/a
3:196817783|196846401	196842798:196842954	ES,	0.538	n/a
9:136277419|136278041	136277419:136278041	IR,	0.538	n/a
2:184043535|184047408	184043535:184044139	IR,	0.529	n/a
6:74190398|74191967	74190720:74190839	ES,	0.529	n/a
8:42761316|42785315	42783869:42783953	ES,	0.529	n/a
16:58709844|58710250	58709844:58710250	IR,	0.52	n/a
17:42512433|42541912	42516039:42516083	ES,	0.517	n/a
6:42941741|42942776	42941741:42941824	A3SS,	0.517	n/a
1:231079552|231097049	231090079:231090149	A3SS,	0.5	n/a
1:231079552|231097049	231090079:231090124	A3SS,	0.5	n/a
10:12272947|12280484	12277243:12277329	ES,	0.5	n/a
10:43127377|43132420	43127743:43127887	A3SS,	0.5	n/a
10:43127377|43132420	43132368:43132420	A5SS,	0.5	n/a
10:43127377|43132420	43132364:43132420	A5SS,	0.5	n/a
10:43127377|43132420	43127743:43127883	A3SS,	0.5	n/a
10:86177527|86198463	86198038:86198133	ES,	0.5	n/a
10:105197772|105198565	105198443:105198565	A3SS,	0.5	n/a
10:105197772|105198565	105198427:105198565	A3SS,	0.5	n/a
11:1000432|1003804	1000432:1000598	A5SS,	0.5	n/a
11:1000432|1003804	1000432:1000684	A5SS,	0.5	n/a
11:17899755|18031686	17981017:17981183	ES,	0.5	n/a
11:18025988|18031686	18031622:18031686	A5SS,	0.5	n/a
11:18025988|18031686	18031618:18031686	A5SS,	0.5	n/a
11:20424465|20448411	20429457:20429578	A3SS,	0.5	n/a
11:20424465|20448411	20429461:20429578	A3SS,	0.5	n/a
11:85692788|85707972	85701293:85701442	A3SS,	0.5	n/a
11:85692788|85707972	85701293:85701421	A3SS,	0.5	n/a
12:133291444|133294706	133294296:133294384	ES,	0.5	n/a
13:31789188|31803431	31797871:31797963	ES,A3SS,	0.5	n/a
13:96622366|96651561	96624834:96624925	ES,	0.5	n/a
16:20922505|20927036	20922505:20922618	A5SS,	0.5	n/a
16:20922505|20927036	20922505:20922586	A5SS,	0.5	n/a
16:28177829|28181230	28178831:28178902	ES,	0.5	n/a
16:28967299|28970421	28970038:28970182	ES,	0.5	n/a
16:50583333|50642271	50641655:50641701	ES,	0.5	n/a
16:66764015|66766408	66766242:66766408	A5SS,	0.5	n/a
16:66764015|66766408	66766199:66766408	A5SS,	0.5	n/a
19:5941632|5957984	5950728:5950797	ES,	0.5	n/a
2:29158387|29164440	29164327:29164440	A3SS,	0.5	n/a
2:29158387|29164440	29164301:29164440	A3SS,	0.5	n/a
2:45773871|45780869	45778264:45778421	ES,	0.5	n/a
2:120634899|120640199	120635040:120635118	A3SS,	0.5	n/a
2:120634899|120640199	120635019:120635118	A3SS,	0.5	n/a
2:197777606|197787849	197787822:197787849	A5SS,	0.5	n/a
20:33057853|33069011	33067500:33067594	A3SS,	0.5	n/a
20:33057853|33069011	33067435:33067594	A3SS,	0.5	n/a
3:48215774|48219478	48215774:48215906	A3SS,	0.5	n/a
3:48215774|48219478	48215774:48215947	A3SS,	0.5	n/a
3:149619859|149639014	149631504:149631629	ES,	0.5	n/a
4:79763539|79772210	79766082:79766203	A3SS,	0.5	n/a
4:79763539|79772210	79766170:79766203	A3SS,	0.5	n/a
5:32268807|32276848	32270951:32271053	A5SS,	0.5	n/a
5:32268807|32276848	32270923:32271053	A5SS,	0.5	n/a
5:109049221|109051965	109051861:109051965	A3SS,	0.5	n/a
5:109049221|109051965	109051821:109051965	A3SS,	0.5	n/a
6:42940621|42942776	42941741:42941824	A3SS,	0.5	n/a
6:42940621|42942776	42941741:42941843	A3SS,	0.5	n/a
6:138808867|138817508	138810069:138810145	ES,	0.5	n/a
6:142094010|142119292	142094010:142094156	A3SS,	0.5	n/a
6:142094010|142119292	142094010:142094127	A3SS,	0.5	n/a
7:47520701|47568745	47544876:47544941	ES,	0.5	n/a
8:42780700|42785315	42783869:42784043	A5SS,	0.5	n/a
8:56854414|56860282	56854414:56854550	A5SS,	0.5	n/a
8:56854414|56860282	56854414:56854487	A5SS,	0.5	n/a
3:3819409|3830758	3824187:3824385	ES,	0.484	n/a
6:42941741|42942776	42941741:42941843	A3SS,	0.483	n/a
1:155891166|155891709	155891166:155891419	A3SS,	0.462	n/a
1:27269151|27269556	27269151:27269556	IR,	0.455	n/a
20:30954187|30989835	30959581:30959677	ES,	0.455	n/a
4:1221987|1235307	1231971:1232125	ES,	0.455	n/a
2:153431650|153437563	153432783:153432889	ES,	0.451	n/a
12:76844631|76881398	76844631:76844759	A3SS,	0.444	n/a
12:109046048|109048186	109046814:109046957	ES,A3SS,	0.444	n/a
7:11101418|11151094	11101418:11101478	A5SS,	0.444	n/a
15:69728477|69729061	69728932:69729061	A3SS,	0.435	n/a
1:108724563|108728576	108727765:108727892	ES,A3SS,	0.429	n/a
1:108724563|108728576	108727765:108727802	ES,A3SS,	0.429	n/a
1:231079552|231097049	231092167:231092306	ES,	0.429	n/a
1:235643370|235658138	235652473:235652573	ES,	0.429	n/a
10:5815805|5842668	5836848:5836977	ES,	0.429	n/a
12:69090631|69096564	69094506:69094672	A5SS,	0.429	n/a
12:116668338|116675510	116669864:116669961	ES,	0.429	n/a
12:117513076|117513606	117513444:117513606	A5SS,	0.429	n/a
2:190593386|190609514	190603291:190603408	ES,	0.429	n/a
3:80680382|80683122	80680887:80681005	ES,A5SS,	0.429	n/a
3:138289160|138290198	138289160:138289340	A3SS,	0.429	n/a
4:52729603|52744020	52742818:52742885	ES,	0.429	n/a
7:102665510|102669865	102669047:102669195	ES,	0.429	n/a
7:139056133|139060902	139059147:139059217	ES,	0.429	n/a
8:28595036|28600731	28600639:28600731	A3SS,	0.429	n/a
9:26861064|26884883	26866632:26866778	ES,	0.429	n/a
X:67731691|67742759	67733169:67733247	ES,	0.429	n/a
13:80094945|80113910	80107464:80107591	A3SS,	0.417	n/a
13:114164553|114175048	114173850:114174043	ES,	0.417	n/a
3:11641366|11643496	11641366:11641427	A3SS,	0.412	n/a
12:116668338|116675510	116674626:116674695	ES,	0.407	n/a
1:197611841|197684204	197627430:197627499	ES,	0.4	n/a
1:233353645|233372726	233372002:233372065	ES,	0.4	n/a
11:102056749|102076805	102056749:102056862	A5SS,	0.4	n/a
12:120995085|120995485	120995085:120995485	IR,	0.4	n/a
13:114164553|114175048	114170358:114170422	ES,	0.4	n/a
14:45623900|45628483	45628366:45628483	A3SS,	0.4	n/a
15:25638893|25657118	25652214:25652284	ES,	0.4	n/a
15:25650608|25657118	25653767:25653831	ES,	0.4	n/a
16:74972048|74976724	74972048:74972181	A3SS,	0.4	n/a
2:131829428|131840230	131829595:131829827	A3SS,	0.4	n/a
3:129684544|129690951	129690803:129690951	A5SS,	0.4	n/a
3:142455221|142467302	142462327:142462428	ES,	0.4	n/a
5:68487622|68492936	68488367:68488424	ES,	0.4	n/a
8:37967897|37968351	37967897:37967985	A5SS,	0.4	n/a
17:80842021|80869665	80863812:80863929	ES,	0.394	n/a
12:22646157|22659753	22650513:22650561	ES,	0.391	n/a
14:62188227|62188541	62188227:62188541	IR,	0.387	n/a
1:225161793|225284941	225190485:225190629	ES,	0.385	n/a
13:113669077|113699675	113692117:113692194	ES,	0.385	n/a
9:134381501|134381840	134381501:134381840	IR,	0.385	n/a
19:3660964|3661999	3661371:3661524	ES,	0.379	n/a
21:38792601|38845182	38802571:38802702	ES,	0.379	n/a
17:80851423|80869665	80861281:80861354	ES,	0.375	n/a
5:77452082|77461496	77459003:77459148	ES,	0.375	n/a
11:20424465|20448411	20424465:20424534	A5SS,	0.371	n/a
11:128993341|128994789	128994183:128994355	ES,	0.371	n/a
14:76642966|76662315	76644551:76644665	ES,	0.368	n/a
1:247320302|247323115	247320302:247320423	A3SS,	0.366	n/a
13:33091994|33101669	33101595:33101669	A5SS,	0.343	n/a
1:31413998|31414970	31414473:31414514	ES,	0.333	n/a
1:51926763|51930998	51929679:51929736	ES,	0.333	n/a
1:65016277|65047987	65024190:65024345	ES,	0.333	n/a
1:186375215|186381025	186377282:186377310	ES,	0.333	n/a
10:5815805|5842668	5825287:5825376	ES,	0.333	n/a
10:126727566|126799662	126776760:126776888	ES,	0.333	n/a
11:65061624|65063461	65062480:65062682	ES,	0.333	n/a
12:133291444|133294706	133294576:133294706	A3SS,	0.333	n/a
14:67431908|67490392	67454653:67454724	ES,	0.333	n/a
14:74370663|74371786	74371634:74371786	A3SS,	0.333	n/a
14:76633006|76662315	76647107:76647192	ES,	0.333	n/a
14:105814830|105821514	105817683:105817723	ES,	0.333	n/a
17:76198580|76198832	76198580:76198832	IR,	0.333	n/a
18:697240|706578	697240:697414	A3SS,	0.333	n/a
18:54291519|54293688	54293393:54293446	A3SS,	0.333	n/a
19:5047487|5082515	5071021:5071070	ES,	0.333	n/a
2:3425652|3428434	3425946:3426027	ES,	0.333	n/a
2:24787164|24807429	24795035:24795101	ES,	0.333	n/a
2:29083984|29087985	29086935:29086977	ES,	0.333	n/a
2:99786013|99787892	99787802:99787892	A5SS,	0.333	n/a
2:159922408|159992809	159932987:159933040	ES,	0.333	n/a
2:175779786|175816930	175805544:175805622	ES,	0.333	n/a
2:207144264|207162097	207156738:207156840	ES,	0.333	n/a
20:18491466|18492926	18491791:18491844	ES,	0.333	n/a
20:33057853|33069011	33065577:33065665	A5SS,	0.333	n/a
20:33065577|33067594	33065577:33065711	A5SS,	0.333	n/a
21:40600426|40601362	40601040:40601145	ES,	0.333	n/a
22:42204879|42209826	42206211:42206295	ES,	0.333	n/a
22:46085592|46136418	46096162:46096258	ES,	0.333	n/a
3:51504945|51530796	51526405:51526529	A3SS,	0.333	n/a
3:113218286|113225452	113222027:113222074	ES,	0.333	n/a
3:133894453|133914026	133894741:133894883	A5SS,	0.333	n/a
4:83799883|83802075	83801815:83801864	ES,	0.333	n/a
5:130883740|130897740	130895450:130895521	ES,	0.333	n/a
5:130883740|130928159	130906120:130906147	ES,	0.333	n/a
6:20781376|20820951	20786912:20787005	ES,	0.333	n/a
6:74190398|74191967	74191763:74191967	A3SS,	0.333	n/a
6:139264650|139265759	139265698:139265759	A5SS,	0.333	n/a
7:33185854|33217203	33192313:33192467	A5SS,	0.333	n/a
7:56049903|56052571	56052505:56052571	A3SS,	0.333	n/a
7:66532272|66548526	66537255:66537376	ES,	0.333	n/a
8:28013459|28019595	28014470:28014589	ES,	0.333	n/a
8:42780700|42785315	42783869:42783953	A5SS,	0.333	n/a
9:115024715|115060196	115060121:115060196	A5SS,	0.333	n/a
X:106410879|106418423	106417769:106417884	ES,	0.333	n/a
1:59805630|59812070	59810670:59810718	ES,	0.319	n/a
11:128993341|129034322	128997107:128997200	ES,	0.316	n/a
13:114174931|114193822	114188360:114188555	ES,A3SS,	0.314	n/a
11:20424465|20448411	20426424:20426529	ES,	0.311	n/a
5:138994171|138994551	138994171:138994359	IR,	0.31	n/a
11:85685751|85695016	85692915:85693031	A3SS,	0.308	n/a
12:70193989|70195501	70193989:70194112	A5SS,	0.306	n/a
15:25650608|25657118	25652214:25652409	ES,	0.304	n/a
16:88008654|88017865	88008654:88008809	A5SS,	0.3	n/a
17:59853762|59857762	59853762:59853863	A3SS,	0.3	n/a
2:70451686|70456450	70455476:70455594	ES,	0.3	n/a
4:139988838|139994721	139993020:139993157	A3SS,	0.3	n/a
17:80842021|80869665	80861281:80861354	ES,	0.297	n/a
12:27521195|27533337	27523062:27523163	ES,	0.294	n/a
15:81372226|81374732	81372353:81372476	ES,	0.294	n/a
X:24190832|24197887	24191724:24191840	ES,	0.294	n/a
9:79852918|79853302	79852918:79853302	IR,	0.29	n/a
11:17899755|18031686	17940242:17940326	ES,	0.286	n/a
17:58756814|58786686	58766293:58766348	ES,A5SS,	0.286	n/a
20:43034698|43036115	43036011:43036115	A3SS,	0.286	n/a
3:52156395|52159197	52157302:52157615	A5SS,	0.286	n/a
6:108645029|108668243	108665979:108666065	ES,	0.286	n/a
11:85707869|85714494	85711686:85711822	ES,	0.273	n/a
13:111303381|111335481	111329321:111329450	ES,	0.273	n/a
16:70582273|70589109	70584553:70584581	ES,	0.273	n/a
3:114412375|114436374	114413827:114413876	ES,	0.273	n/a
20:33065577|33067594	33067500:33067594	A3SS,	0.267	n/a
10:96201653|96234540	96207392:96207427	ES,	0.263	n/a
3:31917925|31921322	31920922:31921045	ES,	0.263	n/a
2:64083440|64085070	64084684:64084852	ES,	0.262	n/a
2:64083440|64085070	64084098:64084136	ES,	0.26	n/a
9:102677460|102691125	102678331:102678450	ES,	0.259	n/a
1:23356962|23377013	23370920:23370979	ES,	0.257	n/a
1:27269151|27269556	27269151:27269267	A5SS,	0.25	n/a
1:28365350|28369161	28368818:28368907	A3SS,	0.25	n/a
1:77672325|77678032	77677905:77678032	A5SS,	0.25	n/a
10:61844360|61845011	61844887:61845011	A5SS,	0.25	n/a
11:581492|587464	581492:581597	A5SS,	0.25	n/a
11:78176922|78189729	78189484:78189516	A3SS,	0.25	n/a
12:22796697|22826594	22821532:22821634	A5SS,	0.25	n/a
13:47224336|47243291	47226713:47226773	ES,	0.25	n/a
15:25650608|25660989	25660857:25660989	A5SS,	0.25	n/a
15:64410316|64415745	64410991:64411053	A3SS,	0.25	n/a
16:31733947|31734674	31734579:31734674	A3SS,	0.25	n/a
16:87760371|87764250	87760648:87760767	ES,A3SS,	0.25	n/a
19:58755331|58758160	58758112:58758160	A3SS,	0.25	n/a
2:197777606|197787849	197787801:197787849	A5SS,	0.25	n/a
2:197777606|197787849	197787738:197787849	A5SS,	0.25	n/a
2:240078348|240158360	240085505:240085619	A5SS,	0.25	n/a
22:47370186|47393605	47385911:47386006	ES,	0.25	n/a
3:52946554|52947633	52946554:52946638	A3SS,	0.25	n/a
3:149619859|149639014	149636501:149636593	ES,	0.25	n/a
6:158994452|159046786	159004986:159005076	ES,	0.25	n/a
7:24663285|24681487	24663681:24663775	ES,A3SS,	0.25	n/a
9:101542471|101544855	101542471:101542578	A3SS,	0.25	n/a
10:96201653|96234540	96204228:96204296	ES,	0.243	n/a
1:231090079|231097049	231090079:231090124	A3SS,	0.242	n/a
12:111991962|111993723	111992670:111992873	A3SS,	0.238	n/a
7:65592691|65610487	65595114:65595235	ES,	0.238	n/a
19:3660964|3661999	3660964:3661044	A3SS,	0.235	n/a
1:214068006|214089442	214074638:214074752	ES,	0.231	n/a
14:76633006|76647192	76644551:76644665	ES,	0.231	n/a
7:6472468|6476164	6474425:6474651	ES,A5SS,	0.231	n/a
13:114174931|114193822	114188451:114188555	ES,A3SS,	0.229	n/a
14:50130033|50141145	50136242:50136345	A3SS,	0.222	n/a
3:52946554|52950230	52946554:52946638	A3SS,	0.22	n/a
15:25650608|25660989	25652214:25652284	ES,	0.214	n/a
19:50902108|50902741	50902558:50902741	A3SS,	0.214	n/a
1:1192372|1192690	1192372:1192690	IR,	0.212	n/a
9:102677460|102691125	102684484:102684577	ES,	0.212	n/a
1:231090079|231097049	231092167:231092306	A3SS,	0.211	n/a
2:240929491|240946787	240945165:240945258	ES,	0.202	n/a
1:70758071|70781249	70779428:70779473	ES,	0.2	n/a
1:92798948|92823600	92823114:92823183	A5SS,	0.2	n/a
1:235505023|235506198	235505326:235505661	A5SS,	0.2	n/a
10:5751493|5754881	5754357:5754502	ES,	0.2	n/a
10:14987104|14991086	14989524:14989608	ES,	0.2	n/a
10:65140078|65214849	65164654:65164725	ES,	0.2	n/a
11:65661485|65664477	65661485:65661587	A3SS,	0.2	n/a
11:85692172|85695016	85692915:85693031	A3SS,	0.2	n/a
12:19498776|19506936	19500041:19500116	ES,	0.2	n/a
12:27199087|27219830	27212278:27212393	ES,	0.2	n/a
13:31789188|31803431	31797578:31797650	ES,	0.2	n/a
13:76195899|76301234	76266553:76266704	ES,	0.2	n/a
14:73550202|73554869	73552690:73552737	ES,	0.2	n/a
17:37437642|37441826	37438982:37439108	A5SS,	0.2	n/a
19:39408364|39409453	39408364:39408779	IR,	0.2	n/a
2:9048751|9098771	9079950:9080063	ES,	0.2	n/a
2:175779786|175809671	175805544:175805622	ES,	0.2	n/a
22:40948110|40990739	40982037:40982116	ES,	0.2	n/a
3:11638734|11643496	11641366:11641427	ES,	0.2	n/a
3:41746549|41759353	41746549:41746634	A3SS,	0.2	n/a
3:47466975|47476627	47470003:47470160	ES,	0.2	n/a
3:56600622|56601081	56600622:56600787	A5SS,	0.2	n/a
6:149899958|149901859	149899958:149900117	A5SS,	0.2	n/a
7:74119496|74131270	74129180:74129236	ES,	0.2	n/a
7:158528194|158531812	158529739:158529808	A3SS,	0.2	n/a
8:141582911|141595410	141591004:141591128	ES,	0.2	n/a
9:36597219|36607670	36604012:36604113	ES,A3SS,	0.2	n/a
2:240929491|240946787	240939600:240939804	ES,	0.193	n/a
12:116534474|116549317	116547579:116547674	ES,	0.188	n/a
21:26825503|26838789	26832668:26832730	ES,	0.188	n/a
6:30618771|30619243	30618771:30618859	A5SS,	0.188	n/a
X:130917915|130919286	130919169:130919286	A5SS,	0.188	n/a
19:18650181|18650530	18650181:18650530	IR,	0.183	n/a
15:50592986|50593565	50593454:50593565	A5SS,	0.182	n/a
6:57372288|57398317	57391890:57391994	ES,	0.182	n/a
17:1746097|1747980	1747214:1747319	A5SS,	0.176	n/a
9:33971649|33973235	33971649:33971735	A3SS,	0.176	n/a
7:155295716|155301792	155299312:155299453	ES,	0.17	n/a
2:240078348|240085619	240081748:240081844	ES,	0.169	n/a
1:180366651|180382606	180375402:180375553	ES,	0.167	n/a
11:128993341|128997200	128994183:128994355	ES,	0.167	n/a
14:23375404|23380612	23377542:23377589	ES,	0.167	n/a
17:80842021|80851508	80847544:80847573	A5SS,	0.167	n/a
3:130685989|130688240	130685989:130686263	IR,	0.167	n/a
5:114875362|114878598	114876582:114876735	ES,	0.167	n/a
6:158850768|158873300	158863743:158863789	ES,	0.167	n/a
7:16720926|16729531	16725549:16725665	ES,A3SS,	0.167	n/a
7:74119496|74133260	74129177:74129236	ES,	0.167	n/a
8:42780700|42785315	42783869:42784003	A5SS,	0.167	n/a
X:71681854|71684581	71681854:71681952	A3SS,	0.167	n/a
1:180366651|180382606	180370846:180370915	ES,	0.161	n/a
22:30032740|30035201	30033373:30033597	ES,	0.158	n/a
3:47762156|47777616	47762919:47762986	ES,	0.158	n/a
3:48019355|48040369	48035914:48036002	ES,	0.158	n/a
16:68300496|68309152	68307698:68307807	ES,A3SS,	0.154	n/a
2:61749746|61761038	61752405:61752468	ES,	0.152	n/a
1:9991949|9994918	9994830:9994918	A5SS,	0.15	n/a
1:180366651|180382606	180370657:180370754	ES,	0.15	n/a
4:79186179|79188586	79187988:79188099	A5SS,	0.15	n/a
7:152007051|152012423	152008998:152009031	A5SS,	0.15	n/a
10:75264608|75265184	75265066:75265184	A5SS,	0.143	n/a
10:99236440|99238146	99236677:99236720	A5SS,	0.143	n/a
17:19921300|20013875	19970513:19970600	ES,	0.143	n/a
17:58756814|58786686	58766293:58766407	ES,A5SS,	0.143	n/a
19:13039156|13039661	13039156:13039477	IR,	0.143	n/a
19:17387304|17387718	17387632:17387718	A3SS,	0.143	n/a
7:1997264|2041756	2011491:2011553	ES,	0.143	n/a
7:27668990|27689252	27671955:27672045	A3SS,	0.143	n/a
9:33953283|33973235	33956077:33956144	ES,	0.143	n/a
9:34286615|34290387	34288377:34288477	ES,A5SS,	0.143	n/a
X:24521444|24523415	24521444:24521628	A5SS,	0.143	n/a
1:92798948|92846430	92798948:92799018	A5SS,	0.141	n/a
21:26825503|26838789	26825503:26825712	A3SS,	0.133	n/a
7:77407655|77408131	77407847:77408131	A3SS,	0.133	n/a
7:138951079|138957186	138954182:138954269	A3SS,	0.13	n/a
13:61013822|61034674	61018821:61018882	A3SS,	0.129	n/a
15:90414707|90432372	90421497:90421532	ES,	0.128	n/a
2:197777606|197787849	197786827:197786919	A3SS,	0.125	n/a
20:47591303|47592736	47591303:47591379	A5SS,	0.125	n/a
3:113207792|113218429	113212896:113212968	A3SS,	0.125	n/a
7:24663282|24681487	24663681:24663775	ES,	0.125	n/a
7:24663285|24681487	24665299:24665355	ES,	0.12	n/a
13:114174931|114193822	114193075:114193196	ES,	0.119	n/a
16:87782279|87795646	87790028:87790083	ES,A5SS,	0.118	n/a
1:92798948|92829327	92798948:92799018	A5SS,	0.111	n/a
1:197611841|197627499	197616185:197616244	ES,	0.111	n/a
11:86778736|86802437	86783945:86784012	ES,	0.111	n/a
12:11126254|11199787	11181000:11181114	ES,	0.111	n/a
12:109212025|109217137	109212208:109212334	A5SS,	0.111	n/a
12:117476788|117484643	117484577:117484643	A5SS,	0.111	n/a
17:49340635|49346265	49345571:49345689	ES,	0.111	n/a
2:225400245|225422573	225421012:225421106	ES,A3SS,	0.111	n/a
21:26793020|26796961	26793821:26794087	A3SS,	0.111	n/a
3:32805947|32811454	32806542:32806669	ES,	0.111	n/a
5:50045985|50059076	50052953:50053049	ES,	0.111	n/a
6:17665470|17669259	17667836:17667943	ES,	0.111	n/a
X:46844285|46857679	46856126:46856231	ES,	0.111	n/a
20:21321359|21327188	21326472:21326525	ES,	0.105	n/a
12:100598718|100601564	100599454:100599535	A5SS,	0.1	n/a
13:31789188|31803431	31797876:31797963	ES,A3SS,	0.1	n/a
14:23375404|23380612	23375404:23375571	A3SS,	0.1	n/a
19:13039156|13039661	13039387:13039477	A5SS,	0.1	n/a
9:36597219|36607670	36603987:36604113	ES,A3SS,	0.1	n/a
1:247318868|247323115	247320302:247320519	ES,A3SS,	0.098	n/a
2:58311224|58316858	58312016:58312134	A5SS,	0.095	n/a
X:322140|323067	322959:323067	A5SS,	0.095	n/a
1:171492360|171496983	171492582:171492661	A3SS,	0.091	n/a
13:111274563|111279894	111277537:111277625	ES,A5SS,	0.091	n/a
19:30471066|30477324	30471066:30471271	A5SS,	0.091	n/a
2:109463194|109473426	109473209:109473426	A3SS,	0.091	n/a
2:176835492|176860374	176858873:176859008	ES,	0.091	n/a
3:196831774|196846401	196842798:196842895	A3SS,	0.09	n/a
4:185637551|185638350	185637551:185637783	A3SS,	0.087	n/a
9:20819795|20823114	20820940:20821060	A5SS,	0.087	n/a
20:10536879|10541468	10537967:10538074	ES,A3SS,	0.086	n/a
12:109046048|109048186	109046814:109046977	ES,A3SS,	0.083	n/a
12:120592774|120593523	120592774:120593234	IR,	0.083	n/a
17:80992911|81006661	80995529:80995702	ES,	0.083	n/a
19:19756683|19757156	19757010:19757156	A5SS,	0.083	n/a
19:19756683|19757156	19756683:19756790	A3SS,	0.083	n/a
10:96201653|96234540	96211315:96211366	ES,	0.081	n/a
11:128993341|129034322	128994183:128994355	ES,	0.081	n/a
2:64083440|64085070	64083922:64084016	ES,	0.081	n/a
16:69404386|69406258	69404386:69404647	A3SS,	0.08	n/a
12:70671912|70704797	70695561:70695645	ES,	0.077	n/a
12:116668238|116675510	116669864:116669961	ES,	0.077	n/a
17:59853762|59857762	59856034:59856139	ES,	0.077	n/a
2:20507739|20527139	20526022:20526146	ES,	0.077	n/a
2:240929491|240946787	240942466:240942557	ES,A3SS,	0.075	n/a
7:98988516|98988876	98988516:98988876	IR,	0.073	n/a
14:23375404|23380612	23378686:23378804	ES,A5SS,	0.071	n/a
15:25650608|25660989	25653767:25653831	ES,	0.071	n/a
6:158850768|158852695	158852573:158852695	A3SS,	0.071	n/a
2:109463194|109473426	109467091:109467211	ES,	0.07	n/a
9:96233423|96261168	96233423:96233499	A5SS,	0.067	n/a
2:234296903|234299129	234298495:234298687	ES,A3SS,	0.065	n/a
3:196118684|196129890	196127500:196127603	ES,	0.065	n/a
6:160819011|160831878	160826723:160826817	ES,	0.064	n/a
3:196842798|196846401	196842798:196842895	A3SS,	0.062	n/a
7:24663285|24681487	24663667:24663775	ES,A3SS,	0.062	n/a
13:61013822|61041513	61018821:61018882	A3SS,	0.06	n/a
5:619105|620376	619105:620376	IR,	0.06	n/a
12:70671912|70704797	70687851:70688074	ES,A3SS,	0.059	n/a
2:159922408|159954346	159932987:159933040	ES,	0.059	n/a
20:10536879|10541468	10541352:10541468	A3SS,	0.059	n/a
3:32805947|32811454	32809498:32809638	ES,	0.059	n/a
7:104678573|104681470	104679600:104679716	ES,	0.059	n/a
2:225400245|225422573	225421012:225421161	ES,A3SS,	0.056	n/a
6:158994452|159010814	159010680:159010814	A3SS,	0.056	n/a
1:92798948|92846430	92829266:92829327	ES,	0.055	n/a
2:240078348|240085619	240085505:240085619	A5SS,	0.054	n/a
10:225934|267296	243851:243945	ES,	0.053	n/a
12:70671912|70704797	70691539:70691659	ES,	0.053	n/a
14:76642966|76662315	76657747:76657781	ES,	0.053	n/a
20:47682729|47683047	47682729:47683047	IR,	0.053	n/a
7:27668990|27672064	27669959:27670350	ES,	0.051	n/a
2:61749746|61753656	61752627:61752694	ES,	0.05	n/a
2:240078348|240085619	240081478:240081622	ES,	0.049	n/a
10:5836848|5842668	5838603:5838825	A5SS,	0.048	n/a
11:62406455|62407203	62406455:62406604	A3SS,	0.048	n/a
21:38792601|38802702	38794884:38794954	ES,	0.048	n/a
17:4186093|4200109	4192525:4192662	A3SS,	0.045	n/a
7:128655033|128658211	128657923:128658211	A5SS,	0.045	n/a
6:159004986|159010814	159010680:159010814	A3SS,	0.044	n/a
9:114148657|114154104	114152264:114152377	A3SS,	0.043	n/a
12:28458582|28460682	28459743:28459878	A3SS,	0.042	n/a
17:79937060|79943483	79939113:79939176	ES,	0.042	n/a
5:353845|376831	367923:368059	ES,A3SS,	0.042	n/a
6:43193385|43194133	43193573:43193619	ES,	0.042	n/a
17:79937060|79943483	79940490:79940552	ES,	0.04	n/a
6:159001972|159010814	159003896:159004083	ES,	0.04	n/a
11:128963516|129034322	128997107:128997200	ES,	0.038	n/a
9:95030456|95032265	95032160:95032265	A5SS,	0.038	n/a
13:42385361|42393522	42392902:42392995	ES,	0.037	n/a
17:1746097|1756483	1748944:1748992	ES,	0.037	n/a
2:58425729|58459247	58433662:58433721	ES,	0.037	n/a
11:62406455|62407203	62406831:62407203	IR,	0.036	n/a
12:51402259|51404549	51402259:51402403	A3SS,	0.036	n/a
7:27668990|27689252	27676295:27676356	ES,	0.036	n/a
7:27668990|27689252	27688167:27688263	ES,	0.036	n/a
13:47297356|47308133	47301683:47301791	ES,	0.035	n/a
3:149563798|149639014	149631504:149631629	ES,	0.034	n/a
5:38991051|39021238	39008687:39008748	ES,	0.034	n/a
6:20781376|20846409	20820816:20820951	ES,	0.034	n/a
11:117023157|117034608	117032409:117032550	ES,	0.033	n/a
19:30462100|30477324	30471066:30471157	ES,	0.032	n/a
19:39408364|39409453	39409062:39409166	A3SS,	0.032	n/a
13:113845186|113854830	113854695:113854830	A5SS,	0.031	n/a
22:25771780|25777545	25771780:25771867	A3SS,	0.03	n/a
22:46125305|46136418	46132848:46132963	ES,	0.03	n/a
6:159001972|159010814	159010680:159010814	A3SS,	0.03	n/a
7:74119496|74133260	74129443:74129486	ES,	0.03	n/a
7:104678573|104681470	104678832:104678972	ES,	0.03	n/a
9:138773479|138774924	138773479:138774924	IR,	0.03	n/a
20:10536879|10541468	10541089:10541155	ES,A5SS,	0.029	n/a
7:64004085|64004810	64004642:64004810	A5SS,	0.028	n/a
9:96233423|96238620	96236515:96236612	ES,	0.024	n/a
2:29006773|29011675	29010420:29010487	ES,	0.022	n/a
X:47705504|47755339	47720771:47720806	ES,	0.021	n/a
2:175779786|175816930	175816471:175816565	ES,	0.02	n/a
13:96636058|96651561	96637493:96637591	ES,	0.019	n/a
2:61749746|61761038	61756201:61756294	ES,	0.019	n/a
9:138773479|138774924	138774061:138774274	ES,A3SS,	0.018	n/a
1:247318868|247323115	247318868:247318927	A3SS,	0.017	n/a
7:158580695|158591763	158580695:158580789	A3SS,	0.017	n/a
X:53672263|53681075	53675516:53675593	ES,	0.017	n/a
12:46622936|46637097	46635519:46635700	ES,	0.016	n/a
X:47705504|47755339	47750205:47750295	ES,	0.016	n/a
1:247318868|247323115	247320302:247320423	ES,A3SS,	0.015	n/a
1:247302018|247323115	247318868:247318997	ES,	0.014	n/a
2:61749746|61761038	61753492:61753656	A5SS,	0.014	n/a
2:240929491|240946787	240944973:240945067	ES,	0.013	n/a
7:43679048|43680248	43680159:43680248	A5SS,	0.013	n/a
13:47297356|47308133	47302073:47302194	ES,	0.012	n/a
9:138773479|138774924	138774061:138774222	ES,A3SS,	0.012	n/a
9:114148657|114154104	114153748:114153858	ES,	0.011	n/a
5:353845|376831	367928:368059	ES,A3SS,	0.008	n/a
5:353845|376831	376733:376831	A3SS,	0.008	n/a
2:61749746|61761038	61752177:61752238	ES,	0.007	n/a
5:137320946|137324004	137323150:137323297	A3SS,	0.007	n/a
3:98568305|98600611	98595511:98595555	ES,	0.006	n/a
2:58449077|58459247	58449077:58449173	A3SS,	0.005	n/a
6:159004986|159010814	159007791:159007882	ES,	0.005	n/a
7:716866|751164	739944:739989	ES,	0.004	n/a

## Sheet: SRR5889364_SW620_rep2
circRNA_id	alternatively_spliced_exon	AS_type	psi_estimation_without_correction	psi_estimation_after_correction
1:92798948|92829327	92798948:92799018	A5SS,	1	n/a
10:4872867|4884696	4881921:4882018	ES,	1	n/a
10:124151819|124166189	124151819:124151888	A5SS,	1	n/a
11:20424465|20429578	20426424:20426533	A5SS,	1	n/a
15:89790860|89804074	89790860:89790962	A5SS,	1	n/a
16:72651082|72651452	72651238:72651452	A5SS,	1	n/a
17:4186093|4210418	4200012:4200109	A3SS,	1	n/a
17:7402358|7402810	7402358:7402482	A5SS,	1	n/a
2:29006773|29011675	29010420:29010487	ES,	1	n/a
2:58425714|58459247	58449077:58449177	A3SS,	1	n/a
2:58425729|58459247	58449077:58449177	A3SS,	1	n/a
2:239090706|239093928	239092294:239092381	A3SS,	1	n/a
3:33109722|33114205	33109722:33109782	A3SS,	1	n/a
4:78694235|78697546	78695684:78695870	A3SS,	1	n/a
5:102231555|102237117	102235640:102235706	ES,	1	n/a
5:102231555|102237117	102232393:102232429	ES,	1	n/a
5:138614016|138614818	138614254:138614429	ES,	1	n/a
7:2269619|2270362	2269619:2269778	A3SS,	1	n/a
17:79660684|79661883	79660900:79660995	A5SS,	0.99	n/a
22:25771780|25777545	25777348:25777545	A5SS,	0.974	n/a
3:157839892|157841780	157841655:157841780	A3SS,	0.968	n/a
9:114148657|114154104	114151836:114152003	A3SS,	0.967	n/a
22:25771780|25777545	25771780:25771975	A3SS,	0.949	n/a
1:9991949|9994918	9994820:9994918	A5SS,	0.948	n/a
2:26596235|26598016	26597908:26598016	A3SS,	0.944	n/a
1:247318868|247323115	247318868:247318997	A3SS,	0.943	n/a
12:116668338|116675510	116674626:116674695	ES,	0.935	n/a
12:120592774|120593523	120593045:120593234	ES,	0.934	n/a
21:16386665|16415895	16387466:16387546	ES,	0.923	n/a
7:99621042|99621930	99621042:99621555	IR,	0.917	n/a
3:57875768|57882659	57881974:57882098	ES,	0.908	n/a
4:83799883|83803090	83799883:83800081	A3SS,	0.905	n/a
X:106331666|106332069	106331666:106332069	IR,	0.887	n/a
11:128993341|129034322	128993783:128993824	ES,	0.881	n/a
3:196831774|196846401	196842798:196842954	A3SS,	0.877	n/a
10:89527430|89536184	89530709:89530798	ES,	0.875	n/a
20:33954360|33971936	33961987:33962059	ES,	0.875	n/a
6:42941741|42942776	42941741:42941824	A3SS,	0.875	n/a
13:33091994|33101669	33101545:33101669	A5SS,	0.871	n/a
8:141874411|141900868	141889570:141889736	ES,	0.867	n/a
7:27668990|27689252	27671955:27672064	A3SS,	0.864	n/a
6:159004986|159010814	159010704:159010814	A3SS,	0.858	n/a
13:61013822|61041513	61018817:61018882	A3SS,	0.851	n/a
16:21350242|21363459	21353829:21353907	ES,	0.833	n/a
17:62817885|62818511	62817885:62818170	A3SS,	0.833	n/a
6:47471016|47472494	47471731:47471790	ES,	0.816	n/a
6:158994452|159010814	159004986:159005076	ES,	0.814	n/a
1:155891166|155891709	155891166:155891318	A3SS,	0.808	n/a
17:59853762|59857762	59853762:59853863	A3SS,	0.8	n/a
16:31733947|31734674	31734579:31734674	A3SS,	0.778	n/a
11:46098305|46113774	46098305:46098370	A3SS,	0.769	n/a
5:76745585|76760634	76745585:76745695	A3SS,	0.769	n/a
11:17899755|18031686	18031622:18031686	A5SS,	0.75	n/a
15:80412670|80415142	80414054:80414162	A3SS,	0.75	n/a
9:111812563|111812972	111812563:111812708	A3SS,	0.75	n/a
15:90414707|90432372	90420538:90420656	ES,	0.741	n/a
7:158566032|158591763	158581036:158581108	A3SS,	0.727	n/a
3:80680382|80683122	80680887:80681005	ES,	0.724	n/a
5:76745585|76760634	76747116:76747178	ES,A3SS,	0.724	n/a
1:233362972|233372726	233372002:233372065	ES,	0.714	n/a
11:65061624|65063461	65063405:65063461	A3SS,	0.714	n/a
5:142416761|142437312	142434004:142434091	A5SS,	0.714	n/a
6:20781376|20846409	20820816:20820951	ES,	0.714	n/a
19:13039156|13039661	13039349:13039477	A5SS,	0.706	n/a
20:47591303|47592736	47591303:47591379	A5SS,	0.7	n/a
9:33971649|33973235	33971649:33971752	A3SS,	0.7	n/a
1:231090079|231097049	231090079:231090149	A3SS,	0.682	n/a
1:247320302|247323115	247320302:247320519	A3SS,	0.682	n/a
11:128993341|128994789	128994183:128994355	ES,	0.673	n/a
19:17387304|17387718	17387304:17387718	IR,	0.672	n/a
1:59805630|59812070	59810670:59810718	ES,	0.667	n/a
3:138407717|138413749	138409842:138409985	A3SS,	0.667	n/a
5:619105|620376	620184:620376	A3SS,	0.667	n/a
2:64083440|64085070	64084684:64084852	ES,	0.655	n/a
9:33953283|33963789	33956077:33956144	ES,	0.631	n/a
5:38991051|39021238	38996921:38996984	ES,	0.63	n/a
3:196118684|196120490	196120425:196120490	A5SS,	0.625	n/a
13:76195899|76301234	76287318:76287388	ES,A5SS,	0.615	n/a
12:116668338|116675510	116669864:116669961	ES,	0.604	n/a
15:25650608|25660989	25652214:25652284	ES,A3SS,	0.6	n/a
19:5653126|5653431	5653126:5653431	IR,	0.6	n/a
12:70193989|70195501	70193989:70194112	A5SS,	0.556	n/a
3:52946554|52950230	52946554:52946663	A3SS,	0.556	n/a
6:150092298|150094305	150093184:150093383	ES,	0.556	n/a
2:234296903|234299129	234298575:234298687	ES,A3SS,	0.55	n/a
16:87782279|87795646	87790005:87790083	A5SS,	0.545	n/a
3:57817110|57827098	57817110:57817263	A5SS,	0.545	n/a
1:1192372|1192690	1192372:1192690	IR,	0.538	n/a
15:25650608|25660989	25653767:25653831	ES,	0.538	n/a
8:48196617|48206619	48203622:48203726	A5SS,	0.538	n/a
2:201721405|201721708	201721405:201721708	IR,	0.533	n/a
2:153431650|153437563	153432783:153432889	ES,	0.529	n/a
9:33953283|33973235	33971649:33971752	A3SS,	0.526	n/a
20:10536879|10541468	10541089:10541139	ES,	0.517	n/a
11:20424465|20448411	20429457:20429578	A3SS,	0.5	n/a
11:20424465|20448411	20429461:20429578	A3SS,	0.5	n/a
11:20424465|20448411	20426424:20426529	A5SS,	0.5	n/a
11:20424465|20448411	20426424:20426533	A5SS,	0.5	n/a
21:38792601|38802702	38794076:38794168	ES,	0.5	n/a
22:46125305|46136418	46132848:46132963	ES,	0.5	n/a
4:148860976|148876525	148860976:148861010	A5SS,	0.5	n/a
4:148860976|148876525	148860976:148861050	A5SS,	0.5	n/a
9:102814699|102822454	102816319:102816449	ES,	0.5	n/a
2:207144264|207162097	207156738:207156840	ES,	0.478	n/a
9:33953283|33973235	33971649:33971735	A3SS,	0.474	n/a
3:98600384|98611450	98609236:98609300	ES,	0.463	n/a
8:48196617|48206619	48203622:48203801	A5SS,	0.462	n/a
12:27199091|27219159	27212278:27212393	ES,	0.455	n/a
15:25650608|25657118	25652214:25652284	ES,	0.455	n/a
16:87782279|87795646	87790028:87790083	A5SS,	0.455	n/a
3:57817110|57827098	57817110:57817257	A5SS,	0.455	n/a
8:37623044|37623873	37623044:37623264	IR,	0.455	n/a
12:70193989|70195501	70193989:70194117	A5SS,	0.444	n/a
3:52946554|52950230	52946554:52946638	A3SS,	0.444	n/a
2:24787164|24807429	24795035:24795101	ES,	0.438	n/a
14:76642966|76662315	76644551:76644665	ES,	0.429	n/a
4:106367540|106377902	106377405:106377448	ES,	0.429	n/a
X:83371237|83375035	83372068:83372156	ES,	0.429	n/a
6:107419755|107420500	107420096:107420138	ES,	0.412	n/a
4:52729603|52744020	52740887:52741132	ES,A5SS,	0.4	n/a
2:64083440|64085070	64084098:64084136	ES,	0.396	n/a
16:72382945|72402621	72384691:72384847	ES,	0.385	n/a
9:79852918|79853302	79852918:79853302	IR,	0.382	n/a
1:23356962|23377013	23370920:23370979	ES,	0.375	n/a
3:196118684|196120490	196120421:196120490	A5SS,	0.375	n/a
X:106410879|106418423	106417769:106417801	ES,	0.375	n/a
12:19615444|19626289	19619682:19619784	ES,	0.368	n/a
12:27521195|27533337	27529279:27529349	ES,	0.333	n/a
13:37614542|37625720	37622701:37622736	ES,	0.333	n/a
3:138407717|138413749	138409842:138409904	A3SS,	0.333	n/a
5:619105|620376	620251:620376	A3SS,	0.333	n/a
5:95091100|95099324	95094115:95094156	ES,	0.333	n/a
7:131060183|131084192	131071879:131072021	ES,	0.333	n/a
1:231090079|231097049	231090079:231090124	A3SS,	0.318	n/a
1:247320302|247323115	247320302:247320423	A3SS,	0.318	n/a
13:76195899|76301234	76287318:76287384	ES,A5SS,	0.308	n/a
7:27668990|27689252	27688167:27688263	ES,	0.304	n/a
20:47591303|47592736	47591303:47591411	A5SS,	0.3	n/a
9:33971649|33973235	33971649:33971735	A3SS,	0.3	n/a
19:13039156|13039661	13039387:13039477	A5SS,	0.294	n/a
12:70671912|70704797	70688017:70688074	ES,	0.289	n/a
11:65061624|65063461	65063335:65063461	A3SS,	0.286	n/a
5:142416761|142437312	142434004:142434185	A5SS,	0.286	n/a
12:109046048|109048186	109046814:109046957	ES,	0.285	n/a
7:158566032|158591763	158581036:158581100	A3SS,	0.273	n/a
19:3660964|3661999	3661371:3661524	ES,A3SS,	0.258	n/a
6:150092298|150094305	150093691:150093820	ES,	0.254	n/a
11:17899755|18031686	18031618:18031686	A5SS,	0.25	n/a
13:51501543|51517530	51509021:51509135	ES,	0.25	n/a
15:80412670|80415142	80414090:80414162	A3SS,	0.25	n/a
19:13039156|13039661	13039156:13039477	IR,	0.25	n/a
21:37775056|37783902	37781811:37781856	ES,	0.25	n/a
9:111812563|111812972	111812563:111812673	A3SS,	0.25	n/a
11:46098305|46113774	46098305:46098391	A3SS,	0.231	n/a
5:76745585|76760634	76745585:76745685	A3SS,	0.231	n/a
2:64083440|64085070	64083922:64084016	ES,	0.227	n/a
19:3660964|3661999	3661371:3661464	ES,A3SS,	0.226	n/a
16:31733947|31734674	31734382:31734674	A3SS,	0.222	n/a
12:116534474|116549317	116547579:116547674	ES,	0.2	n/a
17:59853762|59857762	59855481:59855540	ES,	0.2	n/a
17:59853762|59857762	59853762:59853923	A3SS,	0.2	n/a
3:128514203|128516912	128515988:128516061	ES,	0.2	n/a
1:155891166|155891709	155891166:155891419	A3SS,	0.192	n/a
9:33953283|33960876	33956077:33956144	ES,	0.176	n/a
16:72651082|72651452	72651082:72651452	IR,	0.167	n/a
17:62817885|62818511	62817885:62818162	A3SS,	0.167	n/a
2:215657021|215661841	215659454:215659523	ES,	0.154	n/a
5:72370569|72373320	72372277:72372436	ES,	0.152	n/a
2:61749746|61761038	61752405:61752468	ES,	0.15	n/a
2:234296903|234299129	234298590:234298687	ES,A3SS,	0.15	n/a
13:61013822|61041513	61018821:61018882	A3SS,	0.149	n/a
2:207144264|207162097	207145274:207145317	ES,	0.143	n/a
6:159004986|159010814	159010680:159010814	A3SS,	0.142	n/a
2:109463194|109473426	109467091:109467211	ES,	0.137	n/a
7:27668990|27689252	27671955:27672045	A3SS,	0.136	n/a
7:64004085|64004810	64004455:64004579	ES,	0.133	n/a
17:79937060|79943483	79939113:79939176	ES,	0.13	n/a
13:33091994|33101669	33101595:33101669	A5SS,	0.129	n/a
2:240929491|240946787	240939600:240939804	ES,	0.127	n/a
6:42941741|42942776	42941741:42941843	A3SS,	0.125	n/a
3:196831774|196846401	196842798:196842895	A3SS,	0.123	n/a
13:80080303|80095110	80092662:80092716	ES,	0.121	n/a
12:120592774|120593523	120592774:120593234	IR,	0.119	n/a
11:61133517|61135470	61134900:61135152	ES,	0.118	n/a
11:34093273|34098189	34097783:34098189	IR,	0.115	n/a
12:49854553|49884514	49880033:49880131	ES,	0.111	n/a
1:180366651|180382606	180375402:180375553	ES,	0.106	n/a
15:25650608|25660989	25652214:25652409	ES,A3SS,	0.1	n/a
2:234296903|234299129	234298541:234298687	ES,A3SS,	0.1	n/a
4:52729603|52744020	52740887:52740990	ES,A5SS,	0.1	n/a
4:83799883|83803090	83799883:83799962	A3SS,	0.095	n/a
1:180366651|180382606	180370813:180370915	ES,A5SS,	0.085	n/a
2:240929491|240946787	240945165:240945258	ES,	0.085	n/a
20:10536879|10541468	10537967:10538074	ES,	0.074	n/a
7:27668990|27689252	27676295:27676356	ES,	0.073	n/a
2:240078348|240085619	240081478:240081622	ES,	0.072	n/a
5:76745585|76760634	76747116:76747171	ES,A3SS,	0.069	n/a
12:79441077|79611465	79496794:79496835	ES,	0.067	n/a
1:180366651|180382606	180370657:180370915	ES,A5SS,	0.064	n/a
2:26596235|26598016	26597930:26598016	A3SS,	0.056	n/a
7:24663285|24681487	24663681:24663775	ES,	0.056	n/a
1:9991949|9994918	9994830:9994918	A5SS,	0.052	n/a
1:247302018|247323115	247318868:247318994	ES,	0.049	n/a
15:25650608|25657118	25653767:25653831	ES,	0.048	n/a
1:247318868|247323115	247318868:247318968	A3SS,	0.043	n/a
5:353845|376831	360973:361037	ES,	0.035	n/a
9:114148657|114154104	114151836:114151880	A3SS,	0.033	n/a
3:157839892|157841780	157841661:157841780	A3SS,	0.032	n/a
22:25771780|25777545	25777344:25777545	A5SS,	0.026	n/a
22:25771780|25777545	25771780:25771867	A3SS,	0.026	n/a
22:25771780|25777545	25771780:25771971	A3SS,	0.026	n/a
1:247318868|247323115	247318868:247318927	A3SS,	0.014	n/a
17:79937060|79943483	79940490:79940552	ES,	0.013	n/a
17:79660684|79661883	79660900:79661080	A5SS,	0.01	n/a

## Sheet: SRR5889365_SW620_rep3
circRNA_id	alternatively_spliced_exon	AS_type	psi_estimation_without_correction	psi_estimation_after_correction
1:42730786|42776781	42744019:42744343	A3SS,	1	n/a
1:155891166|155891709	155891166:155891315	A3SS,	1	n/a
1:214068006|214089442	214068737:214068861	A5SS,	1	n/a
10:105197772|105198565	105198443:105198565	A3SS,	1	n/a
11:120345269|120348235	120345269:120345322	A5SS,	1	n/a
12:27199091|27219159	27212278:27212393	ES,	1	n/a
12:56871444|56872046	56871717:56871880	A3SS,	1	n/a
13:76195899|76301234	76287318:76287388	A5SS,	1	n/a
13:76287318|76335174	76287318:76287388	A5SS,	1	n/a
14:50130033|50141145	50141068:50141145	A5SS,	1	n/a
16:27222467|27226329	27222467:27222542	A5SS,	1	n/a
16:68087467|68088520	68087467:68087719	A5SS,	1	n/a
16:69404386|69406258	69404386:69404532	A3SS,	1	n/a
16:72589164|72604414	72590003:72590057	ES,	1	n/a
16:88008654|88014733	88008654:88008813	A5SS,	1	n/a
17:4186093|4210418	4200012:4200109	A3SS,	1	n/a
17:37580880|37588269	37587368:37587441	ES,	1	n/a
17:42512433|42541912	42516039:42516083	ES,	1	n/a
2:58425714|58459247	58449077:58449177	A3SS,	1	n/a
2:58425729|58459247	58449077:58449177	A3SS,	1	n/a
20:33637669|33645374	33637669:33637797	A3SS,	1	n/a
21:40600426|40601362	40601040:40601145	ES,	1	n/a
22:25771780|25777545	25771780:25771975	A3SS,	1	n/a
3:11850991|11852371	11850991:11851156	A3SS,	1	n/a
3:197592294|197602646	197592983:197593090	ES,	1	n/a
4:151656410|151729550	151727423:151727556	A3SS,	1	n/a
5:65284463|65290692	65288538:65288735	A3SS,	1	n/a
6:167435897|167438382	167435897:167436123	A5SS,	1	n/a
6:167435897|167440103	167435897:167436123	A5SS,	1	n/a
7:33066429|33075600	33069241:33069321	A3SS,	1	n/a
7:131060183|131084192	131071879:131072021	ES,	1	n/a
9:96233423|96261168	96261072:96261168	A3SS,	1	n/a
2:58449077|58459247	58449077:58449177	A3SS,	0.992	n/a
1:247318868|247323115	247318868:247318997	A3SS,	0.98	n/a
9:114148657|114154104	114152264:114152381	A3SS,	0.974	n/a
7:99621042|99621930	99621042:99621555	IR,	0.969	n/a
9:114148657|114154104	114151836:114152003	A3SS,	0.961	n/a
11:128963516|129034322	128993783:128993824	ES,	0.957	n/a
6:105280917|105291173	105280917:105281048	A3SS,	0.947	n/a
6:159001972|159010814	159010704:159010814	A3SS,	0.946	n/a
3:196842798|196846401	196842798:196842954	A3SS,	0.941	n/a
17:57808782|57816308	57814814:57814904	ES,	0.933	n/a
4:106367540|106377902	106377405:106377448	ES,	0.929	n/a
6:159004986|159010814	159010704:159010814	A3SS,	0.927	n/a
21:38792601|38802702	38797992:38798083	ES,	0.917	n/a
3:196831774|196846401	196842798:196842954	A3SS,	0.917	n/a
3:57875768|57882659	57881974:57882098	ES,	0.913	n/a
9:95030456|95032265	95032167:95032265	A5SS,	0.913	n/a
6:150092298|150094305	150093150:150093383	ES,	0.901	n/a
3:52946554|52947633	52946554:52946663	A3SS,	0.9	n/a
9:95018962|95032265	95032167:95032265	A5SS,	0.9	n/a
X:24190832|24197887	24193506:24193560	ES,	0.895	n/a
12:70671912|70704797	70671912:70672054	A5SS,	0.88	n/a
2:153431650|153437563	153432783:153432889	ES,	0.875	n/a
3:52946554|52950230	52946554:52946663	A3SS,	0.871	n/a
16:16101673|16108485	16103633:16103758	ES,	0.867	n/a
13:61013822|61041513	61018817:61018882	A3SS,	0.866	n/a
13:61013822|61034674	61018817:61018882	A3SS,	0.861	n/a
9:138741983|138758382	138754313:138754454	ES,	0.857	n/a
7:17885218|17890587	17889970:17890058	A5SS,	0.852	n/a
1:231090079|231097049	231092167:231092228	ES,	0.846	n/a
10:105197772|105198565	105197968:105198082	ES,	0.833	n/a
13:114174931|114193822	114188360:114188555	A3SS,	0.826	n/a
14:71880665|71996087	71884847:71884913	ES,A3SS,	0.818	n/a
4:185637551|185638350	185637551:185637787	A3SS,	0.818	n/a
6:20781376|20846409	20820816:20820951	ES,	0.81	n/a
2:225400245|225422573	225421012:225421137	ES,	0.805	n/a
12:109212025|109212334	109212208:109212334	A5SS,	0.8	n/a
2:234296903|234299129	234298575:234298687	ES,A5SS,	0.797	n/a
11:128993341|129034322	128993783:128993824	ES,	0.788	n/a
14:97312432|97327072	97326894:97327072	A3SS,	0.786	n/a
15:50592986|50593565	50593418:50593565	A5SS,	0.786	n/a
6:42941741|42942776	42941741:42941824	A3SS,	0.786	n/a
19:4941540|4941943	4941540:4941943	IR,	0.781	n/a
10:71243447|71258152	71255350:71255445	ES,	0.778	n/a
12:22646157|22659753	22650513:22650561	ES,	0.778	n/a
16:31733947|31734674	31734382:31734674	A3SS,	0.778	n/a
13:33091994|33101669	33101545:33101669	A5SS,	0.769	n/a
9:102814699|102822454	102816319:102816449	ES,	0.769	n/a
2:99786013|99787892	99787806:99787892	A5SS,	0.767	n/a
3:196812451|196846401	196842798:196842954	A3SS,	0.765	n/a
9:33953283|33973235	33971649:33971752	A3SS,	0.762	n/a
1:246078832|246093239	246092814:246092854	ES,	0.75	n/a
15:25654235|25660989	25660857:25660989	A5SS,	0.75	n/a
16:88008654|88017865	88008654:88008813	A5SS,	0.75	n/a
6:24416625|24418806	24418689:24418806	A3SS,	0.75	n/a
7:56049903|56052571	56052505:56052571	A3SS,	0.75	n/a
1:9991949|9994918	9994820:9994918	A5SS,	0.739	n/a
7:27668990|27689252	27671955:27672064	A3SS,	0.733	n/a
1:231090079|231097049	231090079:231090149	A3SS,	0.719	n/a
10:74468041|74475660	74468041:74468128	A5SS,	0.714	n/a
12:19498776|19501453	19500041:19500116	ES,	0.714	n/a
19:2137726|2138713	2137726:2138713	IR,	0.714	n/a
17:80858527|80869665	80861281:80861354	ES,	0.707	n/a
19:13039156|13039661	13039349:13039477	A5SS,	0.7	n/a
7:64004085|64004810	64004455:64004810	IR,	0.684	n/a
11:85685751|85695016	85687666:85687725	ES,	0.68	n/a
11:85685751|85695016	85692915:85693031	A3SS,	0.667	n/a
15:25650608|25660989	25660862:25660989	A5SS,	0.667	n/a
17:59853762|59857762	59853762:59853923	A3SS,	0.667	n/a
17:59853762|59857762	59855481:59855540	ES,	0.667	n/a
19:5039847|5041262	5039847:5040022	A5SS,	0.667	n/a
20:37612342|37623523	37617436:37617560	A3SS,	0.667	n/a
7:44714010|44715748	44715634:44715748	A3SS,	0.667	n/a
9:33960824|33973235	33971649:33971735	A3SS,	0.667	n/a
10:105197772|105198565	105197772:105198565	IR,	0.655	n/a
9:33971649|33973235	33971649:33971752	A3SS,	0.65	n/a
10:4872867|4884696	4881921:4882018	ES,	0.641	n/a
1:247320302|247323115	247320302:247320519	A3SS,	0.628	n/a
11:20424465|20448411	20429457:20429578	A3SS,	0.625	n/a
13:96636058|96651561	96642227:96642327	ES,	0.625	n/a
17:80842021|80869665	80858527:80858607	ES,	0.625	n/a
17:80842021|80869665	80861281:80861354	ES,	0.625	n/a
2:240078348|240085619	240085499:240085619	A5SS,	0.619	n/a
11:128993341|128997200	128993783:128993824	ES,	0.613	n/a
9:79852918|79853302	79852918:79853302	IR,	0.613	n/a
14:102506573|102507010	102506573:102506776	A5SS,	0.6	n/a
16:72402552|72425114	72407729:72407814	ES,	0.6	n/a
5:87577859|87588460	87583256:87583439	ES,	0.6	n/a
20:30954187|30978970	30978884:30978970	A3SS,	0.588	n/a
14:62188227|62188541	62188227:62188541	IR,	0.586	n/a
6:10702602|10702872	10702602:10702872	IR,	0.579	n/a
1:59805630|59844509	59810670:59810718	ES,	0.571	n/a
11:78176922|78204241	78189631:78189729	ES,	0.571	n/a
11:126051390|126052982	126051390:126051467	A3SS,	0.571	n/a
11:128993341|128994789	128994183:128994355	ES,A3SS,	0.571	n/a
12:109212025|109217137	109212208:109212334	A5SS,	0.571	n/a
4:52729603|52744020	52740887:52741132	ES,	0.571	n/a
11:20424465|20448411	20426424:20426529	ES,A5SS,	0.562	n/a
1:213037067|213046160	213037735:213037861	ES,	0.556	n/a
11:18305342|18307006	18306496:18306552	ES,	0.556	n/a
7:111127294|111161505	111127294:111127397	A3SS,	0.556	n/a
9:2690951|2782846	2690951:2691165	A3SS,	0.556	n/a
2:201721405|201721708	201721405:201721708	IR,	0.543	n/a
12:70193989|70195501	70193989:70194112	A5SS,	0.538	n/a
3:47762156|47770584	47762919:47762986	ES,	0.538	n/a
9:33953283|33973235	33956077:33956144	ES,	0.538	n/a
16:72651082|72651452	72651233:72651452	A5SS,	0.533	n/a
17:3717616|3719564	3718860:3718918	ES,	0.529	n/a
9:33953283|33963789	33956077:33956144	ES,	0.529	n/a
4:83799883|83803093	83799883:83800081	A3SS,	0.526	n/a
3:113207792|113225452	113222027:113222074	ES,	0.51	n/a
1:51926763|51930998	51929321:51929470	A5SS,	0.5	n/a
1:51926763|51930998	51929345:51929470	A5SS,	0.5	n/a
12:109046048|109048186	109046814:109046957	ES,	0.5	n/a
3:11641366|11643496	11641366:11641403	A3SS,	0.5	n/a
3:11641366|11643496	11641366:11641427	A3SS,	0.5	n/a
5:92889467|92899169	92890833:92890907	ES,	0.5	n/a
5:107521818|107684231	107567222:107567315	ES,	0.5	n/a
7:77407655|77408131	77407847:77408131	A3SS,	0.5	n/a
7:77407655|77408131	77407951:77408131	A3SS,	0.5	n/a
12:47497896|47501947	47499831:47499907	ES,	0.493	n/a
20:10536879|10541468	10541089:10541139	ES,	0.485	n/a
5:138614016|138614818	138614254:138614429	ES,	0.483	n/a
20:30954187|30978970	30959581:30959677	ES,	0.478	n/a
14:71880665|71996087	71970329:71970385	ES,	0.474	n/a
4:83799883|83803093	83799883:83799962	A3SS,	0.474	n/a
16:72651082|72651452	72651238:72651452	A5SS,	0.467	n/a
2:64083440|64085070	64084684:64084852	ES,	0.467	n/a
12:70193989|70195501	70193989:70194117	A5SS,	0.462	n/a
15:25654235|25660989	25657055:25657118	ES,	0.455	n/a
2:109463194|109473426	109467091:109467211	ES,	0.444	n/a
7:111127294|111161505	111127294:111127424	A3SS,	0.444	n/a
9:2690951|2782846	2690951:2691077	A3SS,	0.444	n/a
11:126051390|126052982	126051390:126051430	A3SS,	0.429	n/a
12:109212025|109217137	109212212:109212334	A5SS,	0.429	n/a
15:42957451|42961535	42957984:42958046	ES,	0.429	n/a
16:87760371|87764250	87762916:87762970	ES,	0.429	n/a
2:9419446|9437574	9427133:9427241	ES,	0.429	n/a
3:47762156|47770584	47764313:47764388	ES,	0.429	n/a
7:102665510|102669865	102669047:102669195	ES,	0.421	n/a
18:21644104|21663045	21660549:21660875	A5SS,	0.417	n/a
18:21644104|21663045	21660549:21660737	A5SS,	0.417	n/a
7:74119496|74131270	74129177:74129236	ES,	0.417	n/a
12:70149164|70150443	70149164:70149439	IR,	0.415	n/a
20:30954187|30978970	30978878:30978970	A3SS,	0.412	n/a
14:102506573|102507010	102506573:102506747	A5SS,	0.4	n/a
6:170033043|170058454	170052026:170052104	ES,	0.4	n/a
3:51575514|51624575	51606841:51606931	ES,	0.385	n/a
2:240078348|240085619	240085505:240085619	A5SS,	0.381	n/a
1:192997215|192998787	192998309:192998579	IR,	0.375	n/a
11:20424465|20448411	20426424:20426533	ES,A5SS,	0.375	n/a
11:20424465|20448411	20429461:20429578	A3SS,	0.375	n/a
14:76642966|76662315	76657747:76657781	ES,	0.375	n/a
2:240944627|240946787	240944973:240945067	ES,	0.375	n/a
16:68300496|68309152	68307698:68307807	ES,A3SS,	0.373	n/a
1:247320302|247323115	247320302:247320423	A3SS,	0.372	n/a
20:10536879|10541468	10538007:10538074	ES,	0.366	n/a
8:141856359|141900868	141889570:141889736	ES,	0.364	n/a
16:68300496|68309152	68307721:68307807	ES,A3SS,	0.358	n/a
1:51926763|51930998	51929679:51929736	ES,	0.357	n/a
7:64004085|64004810	64004455:64004585	ES,	0.357	n/a
3:47762156|47777616	47762919:47762986	ES,	0.351	n/a
9:33971649|33973235	33971649:33971735	A3SS,	0.35	n/a
11:85685751|85695016	85692915:85693046	A3SS,	0.333	n/a
12:27199091|27219159	27213838:27213926	ES,	0.333	n/a
15:25650608|25660989	25660857:25660989	A5SS,	0.333	n/a
17:59853762|59857762	59853762:59853863	A3SS,	0.333	n/a
19:5039847|5041262	5039847:5040101	A5SS,	0.333	n/a
2:39519914|39536660	39535084:39535146	ES,	0.333	n/a
2:44436349|44445676	44440835:44440896	ES,	0.333	n/a
20:37612342|37623523	37617456:37617560	A3SS,	0.333	n/a
7:44714010|44715748	44715569:44715748	A3SS,	0.333	n/a
8:42914235|42919358	42917470:42917753	ES,	0.333	n/a
9:33960824|33973235	33971649:33971752	A3SS,	0.333	n/a
20:30954187|30989835	30959581:30959677	ES,	0.326	n/a
19:30462100|30477324	30471066:30471157	ES,	0.314	n/a
1:225273412|225284941	225275728:225275831	ES,	0.3	n/a
19:13039156|13039661	13039387:13039477	A5SS,	0.3	n/a
10:74468041|74475660	74468041:74468114	A5SS,	0.286	n/a
13:31789188|31803431	31799005:31799056	ES,	0.286	n/a
2:175779786|175816930	175809898:175809989	ES,	0.286	n/a
1:59805630|59812070	59810670:59810718	ES,	0.284	n/a
9:102677460|102691125	102678331:102678450	ES,	0.283	n/a
1:231090079|231097049	231090079:231090124	A3SS,	0.281	n/a
5:619105|620376	619105:620376	IR,	0.269	n/a
11:61133517|61135470	61134900:61135470	IR,	0.267	n/a
7:27668990|27689252	27671955:27672045	A3SS,	0.267	n/a
8:141828376|141900868	141840571:141840625	ES,	0.263	n/a
1:9991949|9994918	9994830:9994918	A5SS,	0.261	n/a
11:128963516|129034322	128997107:128997200	ES,	0.25	n/a
15:25654235|25660989	25660862:25660989	A5SS,	0.25	n/a
16:88008654|88017865	88008654:88008791	A5SS,	0.25	n/a
2:64083440|64085070	64084098:64084136	ES,	0.25	n/a
6:24416625|24418806	24418599:24418806	A3SS,	0.25	n/a
7:56049903|56052571	56052540:56052571	A3SS,	0.25	n/a
12:112513482|112516545	112515992:112516545	IR,	0.238	n/a
9:33953283|33973235	33971649:33971735	A3SS,	0.238	n/a
3:196812451|196846401	196842798:196842895	A3SS,	0.235	n/a
3:98600384|98611450	98609236:98609300	ES,	0.234	n/a
1:23356962|23377013	23370920:23370979	ES,	0.233	n/a
2:99786013|99787892	99787802:99787892	A5SS,	0.233	n/a
13:33091994|33101669	33101595:33101669	A5SS,	0.231	n/a
9:102677460|102691125	102684484:102684577	ES,	0.224	n/a
1:1192372|1192690	1192372:1192690	IR,	0.222	n/a
16:31733947|31734674	31734579:31734674	A3SS,	0.222	n/a
2:225400245|225422573	225412638:225412676	ES,	0.222	n/a
1:59805630|59844509	59808083:59808121	ES,	0.217	n/a
7:74119496|74133260	74129177:74129236	ES,	0.217	n/a
1:180366651|180382606	180370846:180370915	ES,	0.216	n/a
14:97312432|97327072	97326984:97327072	A3SS,	0.214	n/a
15:50592986|50593565	50593454:50593565	A5SS,	0.214	n/a
6:42941741|42942776	42941741:42941843	A3SS,	0.214	n/a
11:61133517|61135470	61134900:61134997	ES,A3SS,	0.207	n/a
10:12272947|12280484	12277243:12277329	ES,	0.2	n/a
12:109212025|109212334	109212212:109212334	A5SS,	0.2	n/a
12:116668238|116675510	116674626:116674695	ES,	0.2	n/a
5:68487622|68492936	68490775:68490825	ES,	0.2	n/a
6:150092298|150094305	150093691:150093820	ES,	0.2	n/a
X:106410879|106418423	106417769:106417884	ES,	0.2	n/a
2:64083440|64085070	64083922:64084016	ES,	0.193	n/a
16:74491772|74493687	74493117:74493210	ES,	0.189	n/a
4:185637551|185638350	185637551:185637783	A3SS,	0.182	n/a
2:190670378|190682906	190674748:190674808	ES,	0.176	n/a
13:114174931|114193822	114188451:114188555	A3SS,	0.174	n/a
2:61749746|61761038	61752405:61752468	ES,	0.172	n/a
7:74119496|74133260	74129443:74129486	ES,	0.171	n/a
18:21644104|21663045	21660549:21660903	A5SS,	0.167	n/a
9:134381501|134381840	134381501:134381840	IR,	0.167	n/a
12:116668338|116675510	116669864:116669961	ES,	0.163	n/a
11:20424465|20448411	20426251:20426338	ES,	0.154	n/a
7:27668990|27689252	27676295:27676356	ES,	0.154	n/a
2:240929491|240946787	240945165:240945258	ES,	0.15	n/a
2:240078348|240085619	240081478:240081622	ES,	0.148	n/a
7:17885218|17890587	17890009:17890058	A5SS,	0.148	n/a
2:242343243|242350545	242346952:242347030	ES,	0.143	n/a
7:47520701|47568745	47551915:47552046	ES,	0.143	n/a
13:61013822|61034674	61018821:61018882	A3SS,	0.139	n/a
13:61013822|61041513	61018821:61018882	A3SS,	0.134	n/a
11:128993341|129034322	128997107:128997200	ES,	0.132	n/a
3:52946554|52950230	52946554:52946638	A3SS,	0.129	n/a
7:24663285|24681487	24663681:24663775	ES,	0.125	n/a
12:70671912|70704797	70671912:70672009	A5SS,	0.12	n/a
15:25650608|25657118	25653767:25653831	ES,	0.12	n/a
16:68300496|68309152	68307725:68307807	ES,A3SS,	0.119	n/a
15:25650608|25660989	25652214:25652284	ES,	0.111	n/a
16:87760371|87764250	87760627:87760767	ES,	0.111	n/a
2:240929491|240946787	240939600:240939804	ES,	0.111	n/a
15:25650608|25657118	25652214:25652284	ES,A3SS,	0.107	n/a
2:240078348|240085619	240081748:240081844	ES,	0.106	n/a
3:52946554|52947633	52946554:52946638	A3SS,	0.1	n/a
17:79937060|79943483	79939113:79939176	ES,	0.096	n/a
14:71880665|71996087	71995416:71995457	ES,	0.095	n/a
1:180366651|180382606	180370657:180370754	ES,	0.091	n/a
13:96636058|96651561	96637493:96637591	ES,	0.091	n/a
14:51259430|51273536	51261154:51261243	ES,	0.091	n/a
9:95030456|95032265	95032160:95032265	A5SS,	0.087	n/a
10:96201653|96234540	96207392:96207427	ES,	0.081	n/a
X:24190832|24197887	24191724:24191840	ES,	0.081	n/a
3:196831774|196846401	196842798:196842895	A3SS,	0.077	n/a
6:159004986|159010814	159010680:159010814	A3SS,	0.073	n/a
11:128993341|128994789	128994183:128994290	ES,A3SS,	0.071	n/a
15:25650608|25657118	25652214:25652409	ES,A3SS,	0.071	n/a
19:3660964|3661999	3661371:3661524	ES,	0.071	n/a
3:80680382|80683122	80680887:80681005	ES,A5SS,	0.071	n/a
3:80680382|80683122	80680859:80681005	ES,A5SS,	0.071	n/a
11:61133517|61135470	61134879:61134997	ES,A3SS,	0.069	n/a
13:80080303|80095110	80093127:80093304	ES,	0.067	n/a
9:95018962|95032265	95032119:95032265	A5SS,	0.067	n/a
22:46125305|46136418	46132848:46132963	ES,	0.064	n/a
3:196842798|196846401	196842798:196842895	A3SS,	0.059	n/a
6:107824861|107827631	107826229:107826270	ES,	0.059	n/a
15:43120126|43132631	43130281:43130377	ES,	0.058	n/a
6:159001972|159010814	159010680:159010814	A3SS,	0.054	n/a
6:105280917|105291173	105280917:105281067	A3SS,	0.053	n/a
17:79937060|79943483	79940490:79940552	ES,	0.052	n/a
15:25650608|25660989	25653767:25653831	ES,	0.051	n/a
21:16386665|16415895	16412684:16412737	ES,	0.039	n/a
9:114148657|114154104	114151836:114151934	A3SS,	0.039	n/a
13:33091994|33101669	33100676:33100725	ES,	0.037	n/a
5:353845|376831	367923:368059	ES,	0.037	n/a
X:53672263|53681075	53675516:53675562	ES,	0.037	n/a
2:234296903|234299129	234298575:234298722	ES,A5SS,	0.034	n/a
5:50045985|50059076	50052953:50053049	ES,	0.033	n/a
9:95018962|95032265	95032160:95032265	A5SS,	0.033	n/a
13:47297356|47308133	47301683:47301791	ES,	0.027	n/a
9:114148657|114154104	114152264:114152377	A3SS,	0.026	n/a
11:128993341|129034322	128994183:128994355	ES,	0.025	n/a
5:353845|376831	360973:361037	ES,	0.024	n/a
10:225934|267296	243851:243945	ES,	0.023	n/a
9:33935837|33941860	33940513:33940609	ES,	0.023	n/a
10:86177527|86185649	86178332:86178362	ES,A3SS,	0.022	n/a
1:247318868|247323115	247318868:247318994	A3SS,	0.02	n/a
22:46085592|46114373	46108999:46109071	ES,	0.02	n/a
20:30954187|30989835	30978878:30978970	ES,	0.017	n/a
10:86177527|86185649	86178200:86178362	ES,A3SS,	0.016	n/a
1:247318868|247323115	247320302:247320519	ES,	0.01	n/a
6:159004986|159010814	159007791:159007882	ES,	0.01	n/a
2:58449077|58459247	58449077:58449173	A3SS,	0.008	n/a
7:716866|751164	739944:739989	ES,	0.007	n/a
3:196831774|196846401	196842798:196842945	A3SS,	0.006	n/a
1:247318868|247323115	247319708:247319769	ES,	0.005	n/a
