# Supplementary material for: Docker4Circ: A Framework for the Reproducible Characterization of circRNAs from RNA-Seq Data
Source: Int J Mol Sci. 2019 Dec 31;21(1):293. doi: 10.3390/ijms21010293 (PMC6982331; doi:10.3390/ijms21010293)
Supplement: Supplementary file 1 [file ijms-21-00293-s001.zip › Supplementary_Table_6_Docker4Circ_circRNAs_Annotation.xlsx]

## Sheet: A_CircBase
ID	circRNA ID	genomic length	spliced seq length	samples	repeats	annotation	best transcript	gene symbol	circRNA study
chr11_34969053_34991833_+	hsa_circ_0006254	22781	723	Hs68_RNase, Hs68_control, K562, H1hesc, Ag04450, A549, Sknshra	None	ANNOTATED, CDS, coding, INTERNAL, OVCODE, OVEXON	NM_003477	PDHX	Jeck2013, Salzman2013
chr3_4418014_4461830_-	hsa_circ_0064030	43817	495	K562, H1hesc	NA	ANNOTATED, CDS, coding, INTERNAL, OVCODE, OVEXON	NM_182760	SUMF1	Salzman2013
chr6_159004986_159029782_+	hsa_circ_0003735	24797	728	Hs68_RNase, Hs68_control, Hsmm, Hepg2	None	ANNOTATED, CDS, coding, INTERNAL, OVCODE, OVEXON	NM_020823	TMEM181	Jeck2013, Salzman2013
chr11_82917100_82922472_+	hsa_circ_0003661	5373	364	Hs68_RNase, Hs68_control, Hepg2	None	ANNOTATED, CDS, coding, INTERNAL, OVCODE, OVEXON	NM_182603	ANKRD42	Jeck2013, Salzman2013
chr2_48555700_48573890_+	hsa_circ_0007641	18191	693	Hs68_RNase, Hs68_control	DNA	ANNOTATED, CDS, coding, INTERNAL, OVCODE, OVEXON, UTR5	NM_002158	FOXN2	Jeck2013
chr3_27453133_27465643_-	hsa_circ_0002901	12511	616	Hs68_RNase, Hs68_control, Nhek, Bj, A549	None	ANNOTATED, CDS, coding, INTERNAL, OVCODE, OVEXON	NM_003615	SLC4A7	Jeck2013, Salzman2013
chr12_100491143_100492319_-	hsa_circ_0027851	1177	331	Ag04450	NA	ANNOTATED, CDS, coding, INTERNAL, OVCODE, OVEXON	NM_015054	UHRF1BP1L	Salzman2013
chr19_53158814_53164096_-	hsa_circ_0052112	5283	209	K562, Bj	NA	ANNOTATED, coding, INTERNAL, OVEXON, UTR5	NM_001242531	ZNF83	Salzman2013
chr7_959605_966280_-	hsa_circ_0079091	6676	175	Hepg2, Helas3, Gm12878, A549, Sknshra	NA	ANNOTATED, CDS, coding, INTERNAL, OVCODE, OVEXON	NM_006869	ADAP1	Salzman2013
chr8_142264088_142264728_-	hsa_circ_0001829	641	641	cd_19, neutr	None	ALT_DONOR, downstream_end, ncRNA	TCONS_00015535	TCONS_00015535	Memczak2013
chr1_155408118_155429689_-	hsa_circ_0003247	21572	844	Hs68_RNase, Hs68_control, Nhek, K562, Hsmm, Hepg2, H1hesc, Gm12878, Bj, Ag04450, Sknshra	None	ANNOTATED, CDS, coding, INTERNAL, OVCODE, OVEXON	NM_018489	ASH1L	Jeck2013, Salzman2013
chr9_95030456_95032265_-	hsa_circ_0008367	1810	226	Hs68_RNase, Hs68_control, K562, Hepg2, Helas3, H1hesc, Gm12878, Bj, Ag04450, A549, Nhek	None	ANNOTATED, CDS, coding, INTERNAL, OVCODE, OVEXON	NM_013417	IARS	Jeck2013, Salzman2013
chr1_155686797_155695810_+	hsa_circ_0014611	9014	427	Nhek, K562, Gm12878, Ag04450, Sknshra	NA	ANNOTATED, CDS, coding, INTERNAL, OVCODE, OVEXON	NM_001199849	DAP3	Salzman2013
chr5_137027974_137045545_-	hsa_circ_0074066	17572	392	Hepg2, H1hesc, Gm12878, Ag04450, Sknshra	NA	ANNOTATED, CDS, coding, INTERNAL, OVCODE, OVERLAPTX, OVEXON	NM_017415	KLHL3	Salzman2013
chr7_151960101_151962294_-	hsa_circ_0002932	2194	287	Hs68_RNase, Hs68_control, K562, Ag04450	None	ANNOTATED, CDS, coding, INTERNAL, OVCODE, OVEXON	NM_170606	MLL3	Jeck2013, Salzman2013
chr9_115166275_115181238_+	hsa_circ_0003597	14964	581	Hs68_RNase, Hs68_control, K562, Hepg2, H1hesc, Gm12878, Ag04450	None	ANNOTATED, CDS, coding, INTERNAL, OVCODE, OVEXON	NM_032303	HSDL2	Jeck2013, Salzman2013
chr4_77691779_77692051_+	hsa_circ_0070051	273	273	H1hesc, A549, Sknshra	NA	ANNOTATED, CDS, coding, INTERNAL, OVCODE, OVERLAPTX, OVEXON	NM_020859	SHROOM3	Salzman2013
chr14_51710574_51716483_+	hsa_circ_0009104	5910	512	Hs68_RNase, Hs68_control, Nhek, K562, Hsmm, Hepg2, Helas3, H1hesc, Gm12878, Bj, Ag04450, A549, Sknshra, Mcf7	None	ANNOTATED, CDS, coding, INTERNAL, OVCODE, OVEXON	NM_030755	TMX1	Jeck2013, Salzman2013
chr12_49854553_49884514_+	hsa_circ_0026150	29962	507	K562, Ag04450	NA	ANNOTATED, CDS, coding, INTERNAL, OVCODE, OVEXON, UTR5	NM_023071	SPATS2	Salzman2013
chr22_42032117_42033795_+	hsa_circ_0063587	1679	578	K562, Ag04450, A549	NA	ANNOTATED, CDS, coding, INTERNAL, OVCODE, OVEXON	NM_001469	XRCC6	Salzman2013
chr10_27431316_27434519_-	hsa_circ_0005633	3204	262	Hs68_RNase, Hs68_control, Nhek, K562, Huvec, Hepg2, Helas3, H1hesc, Gm12878, Bj, Ag04450, A549, Sknshra	None	ANNOTATED, CDS, coding, INTERNAL, OVCODE, OVEXON	NM_139312	YME1L1	Jeck2013, Salzman2013
chr2_39519914_39536660_-	hsa_circ_0054203	16747	274	K562, Hepg2	NA	ANNOTATED, CDS, coding, INTERNAL, OVCODE, OVEXON	NM_003618	MAP4K3	Salzman2013
chr12_96717726_96728643_-	hsa_circ_0002762	10918	312	Hs68_RNase, Hs68_control, K562, Huvec, Hepg2, Helas3, H1hesc, Gm12878, Bj, Ag04450, A549, Sknshra	None	ANNOTATED, CDS, coding, INTERNAL, OVCODE, OVEXON, UTR5	NM_001170464	CDK17	Jeck2013, Salzman2013
chr6_158288579_158296208_+	hsa_circ_0002971	7630	288	Hs68_RNase, Hs68_control	None	ANNOTATED, CDS, coding, INTERNAL, OVCODE, OVEXON	NM_016224	SNX9	Jeck2013
chr4_151682935_151729550_-	hsa_circ_0071185	46616	340	K562, H1hesc, Gm12878, A549	NA	ANNOTATED, CDS, coding, INTERNAL, OVCODE, OVERLAPTX, OVEXON	NM_001199282	LRBA	Salzman2013
chr1_200776504_200801973_+	hsa_circ_0006265	25470	528	Hs68_RNase, Hs68_control, K562, Hepg2, Ag04450, A549, Sknshra	None	ANNOTATED, CDS, coding, INTERNAL, OVCODE, OVEXON	NM_203459	CAMSAP2	Jeck2013, Salzman2013
chr10_64148155_64159552_+	hsa_circ_0003658	11398	485	Hs68_RNase, Hs68_control	None	ALT_DONOR, CDS, coding, INTERNAL, OVCODE, OVEXON, UTR3	NM_014951	ZNF365	Jeck2013
chr2_30748453_30791042_+	hsa_circ_0053375	42590	632	K562	NA	ANNOTATED, CDS, coding, INTERNAL, OVCODE, OVEXON	NM_182551	LCLAT1	Salzman2013
chr5_115202367_115205825_+	hsa_circ_0002919	3459	204	Hs68_RNase, Hs68_control, K562, Gm12878, Bj, Ag04450, A549, Nhek, Mcf7	None	ANNOTATED, CDS, coding, INTERNAL, OVCODE, OVEXON	NM_001284	AP3S1	Jeck2013, Salzman2013
chr19_40964062_40964452_-	hsa_circ_0003061	391	255	Hs68_RNase, Hs68_control	None	ANNOTATED, CDS, coding, INTERNAL, OVCODE, OVEXON	NM_000713	BLVRB	Jeck2013
chr16_47531310_47537001_+	hsa_circ_0039261	5692	329	K562, Hepg2, Helas3, H1hesc, Gm12878, Bj, Ag04450, A549	NA	ANNOTATED, CDS, coding, INTERNAL, OVCODE, OVERLAPTX, OVEXON	NM_001031835	PHKB	Salzman2013
chr1_52215817_52231653_+	hsa_circ_0008022	15837	446	Hs68_RNase, Hs68_control, K562, H1hesc, Bj	None	ANNOTATED, CDS, coding, INTERNAL, OVCODE, OVEXON	NM_024586	OSBPL9	Jeck2013, Salzman2013
chr4_79158664_79173705_+	hsa_circ_0070097	15042	361	Helas3, H1hesc, Gm12878	NA	ANNOTATED, CDS, coding, INTERNAL, OVCODE, OVEXON	NM_025074	FRAS1	Salzman2013
chr8_17847368_17851128_+	hsa_circ_0002887	3761	417	Hs68_RNase, Hs68_control, K562, Gm12878	None	ANNOTATED, CDS, coding, INTERNAL, OVCODE, OVEXON	NM_006197	PCM1	Jeck2013, Salzman2013
chr14_31581622_31583546_-	hsa_circ_0004829	1925	660	Hs68_RNase, Hs68_control, K562, Bj	None	ANNOTATED, CDS, coding, INTERNAL, OVCODE, OVEXON	NM_015382	HECTD1	Jeck2013, Salzman2013
chr2_48049357_48050499_-	hsa_circ_0006794	1143	304	Hs68_RNase, Hs68_control, Nhek, K562, Ag04450	None	ANNOTATED, CDS, coding, INTERNAL, OVCODE, OVEXON	NM_001190274	FBXO11	Jeck2013, Salzman2013
chr19_41847788_41848152_-	hsa_circ_0002837	365	226	Hs68_RNase, Hs68_control	None	ANNOTATED, CDS, coding, INTERNAL, OVCODE, OVEXON	NM_000660	TGFB1	Jeck2013
chr8_41455811_41456823_+	hsa_circ_0007461	1013	1013	Hs68_RNase, Hs68_control	None	ANNOTATED, CDS, coding, INTERNAL, OVCODE, OVEXON, UTR5	NM_178819	AGPAT6	Jeck2013
chr3_57832924_57843886_+	hsa_circ_0066277	10963	268	Nhek, K562, Huvec, Hepg2, Helas3, H1hesc, Gm12878, Bj, Ag04450, A549, Sknshra, Mcf7	NA	ANNOTATED, CDS, coding, INTERNAL, OVCODE, OVEXON	NM_007159	SLMAP	Salzman2013
chr7_33388680_33427756_+	hsa_circ_0079812	39077	786	Huvec, Ag04450, A549, Sknshra	NA	ANNOTATED, CDS, coding, INTERNAL, OVCODE, OVEXON	NM_198428	BBS9	Salzman2013
chr16_74493580_74497377_-	hsa_circ_0003315	3798	477	Hs68_RNase, Hs68_control, Nhek, K562, Hepg2, Helas3, Gm12878, Bj, Ag04450, A549, Sknshra	None	ANNOTATED, INTERNAL, ncRNA, OVCODE, OVEXON	NR_027264	GLG1	Jeck2013, Salzman2013
chr12_69983265_69985939_+	hsa_circ_0000418	2675	304	cd_34, Hs68_RNase, Hs68_control, K562	None	ANNOTATED, CDS, coding, INTERNAL, OVCODE, OVEXON	NM_001198842	CCT2	Jeck2013, Memczak2013, Salzman2013
chr20_33000321_33001685_+	hsa_circ_0059935	1365	263	K562, Helas3	NA	ANNOTATED, CDS, coding, INTERNAL, OVCODE, OVEXON	NM_031483	ITCH	Salzman2013
chr9_137591755_137593179_+	hsa_circ_0089430	1425	377	Helas3, Bj, Ag04450, A549	NA	ANNOTATED, CDS, coding, INTERNAL, OVCODE, OVERLAPTX, OVEXON	NM_000093	COL5A1	Salzman2013
chr10_43654163_43671480_+	hsa_circ_0009002	17318	675	Hs68_RNase, Hs68_control	None	ANNOTATED, CDS, coding, INTERNAL, OVCODE, OVEXON	NM_018590	CSGALNACT2	Jeck2013
chr20_32207323_32216241_+	hsa_circ_0059862	8919	612	K562	NA	ANNOTATED, CDS, coding, INTERNAL, OVCODE, OVEXON	NM_005093	CBFA2T2	Salzman2013
chr3_138407717_138413749_-	hsa_circ_0067528	6033	366	K562, Helas3, H1hesc	NA	ANNOTATED, CDS, coding, INTERNAL, OVCODE, OVEXON	NM_006219	PIK3CB	Salzman2013
chr2_58449077_58459247_-	hsa_circ_0001009	10171	278	cd_19, Hs68_RNase, Hs68_control, Nhek, K562, Hepg2, Helas3, H1hesc, Gm12878, Bj, Ag04450, A549, Sknshra, Mcf7	None	ANNOTATED, CDS, coding, INTERNAL, OVCODE, OVEXON	NM_018062	FANCL	Jeck2013, Memczak2013, Salzman2013
chr18_19345733_19359646_+	hsa_circ_0000835	13914	679	HEK293, cd_19, Hs68_RNase, Hs68_control, Nhek, K562, Huvec, Hepg2, Helas3, H1hesc, Gm12878, Bj, Ag04450, A549, Sknshra, Mcf7	None	ANNOTATED, CDS, coding, INTERNAL, OVCODE, OVEXON	NM_020774	MIB1	Jeck2013, Memczak2013, Salzman2013
chr3_33728552_33731424_-	hsa_circ_0064790	2873	272	K562, H1hesc, Gm12878, Bj, A549, Sknshra	NA	ANNOTATED, CDS, coding, INTERNAL, OVCODE, OVEXON	NM_015097	CLASP2	Salzman2013
chr20_30380538_30382351_+	hsa_circ_0009098	1814	420	Hs68_RNase, Hs68_control, Nhek, K562, Huvec, Ag04450, A549, Sknshra	None	ANNOTATED, CDS, coding, INTERNAL, OVCODE, OVEXON	NM_012112	TPX2	Jeck2013, Salzman2013
chr4_154236637_154237151_+	hsa_circ_0071291	515	272	Huvec	NA	ANNOTATED, CDS, coding, INTERNAL, OVCODE, OVEXON	NM_001130067	TRIM2	Salzman2013
chr5_73128163_73136585_+	hsa_circ_0006969	8423	403	Hs68_RNase, Hs68_control, Hepg2, Helas3, Ag04450, Nhek	None	ANNOTATED, CDS, coding, INTERNAL, OVCODE, OVEXON	NM_001080479	RGNEF	Jeck2013, Salzman2013
chr17_27809215_27818883_+	hsa_circ_0007882	9669	268	Hs68_RNase, Hs68_control, Nhek, K562, H1hesc, Gm12878, Ag04450, A549, Sknshra	None	ANNOTATED, CDS, coding, INTERNAL, OVCODE, OVEXON	NM_020791	TAOK1	Jeck2013, Salzman2013
chr4_177632653_177650900_-	hsa_circ_0004496	18248	557	Hs68_RNase, Hs68_control	None	ANNOTATED, CDS, coding, INTERNAL, OVCODE, OVEXON	NM_005429	VEGFC	Jeck2013
chr5_14270934_14280545_+	hsa_circ_0003037	9612	190	Hs68_RNase, Hs68_control, Gm12878, Bj, Ag04450, A549, Nhek	None	ANNOTATED, CDS, coding, INTERNAL, OVCODE, OVEXON	NM_007118	TRIO	Jeck2013, Salzman2013
chr12_102107868_102114032_+	hsa_circ_0027904	6165	507	Huvec, Bj	NA	ANNOTATED, CDS, coding, INTERNAL, OVCODE, OVEXON	NM_020244	CHPT1	Salzman2013
chr3_11849307_11851156_-	hsa_circ_0007287	1850	1850	Hs68_RNase, Hs68_control	None	ALT_DONOR, CDS, coding, INTERNAL, intronic, OVCODE, OVEXON	NM_138807	TAMM41	Jeck2013
chr2_242079936_242082489_-	hsa_circ_0058988	2554	471	Nhek, K562, Hepg2, Helas3, H1hesc, Gm12878, Ag04450, A549, Sknshra	NA	ANNOTATED, CDS, coding, INTERNAL, OVCODE, OVEXON, UTR5	NM_001252124	PASK	Salzman2013
chr16_88061089_88071617_+	hsa_circ_0040823	10529	416	Nhek, K562, Huvec, Hsmm, Hepg2, Helas3, H1hesc, Gm12878, Bj, Ag04450, A549, Sknshra, Mcf7	NA	ANNOTATED, CDS, coding, INTERNAL, OVCODE, OVEXON	NM_001173542	BANP	Salzman2013
chr3_53908238_53910107_-	hsa_circ_0002554	1870	287	Hs68_RNase, Hs68_control, K562, Ag04450	None	ANNOTATED, CDS, coding, INTERNAL, OVCODE, OVEXON	NM_022899	ACTR8	Jeck2013, Salzman2013
chr17_79573717_79575848_-	hsa_circ_0046202	2132	219	Nhek, K562, Hepg2, Helas3, Ag04450, A549, Sknshra	NA	ANNOTATED, CDS, coding, INTERNAL, OVCODE, OVEXON	NM_017921	NPLOC4	Salzman2013
chr9_79852918_79853302_+	hsa_circ_0087247	385	305	K562, Ag04450	NA	ANNOTATED, CDS, coding, INTERNAL, OVCODE, OVEXON	NM_033305	VPS13A	Salzman2013
chr3_33109722_33110462_-	hsa_circ_0001279	741	212	cd_19, Hs68_RNase, Hs68_control, Nhek, K562, Huvec, Hepg2, Helas3, H1hesc, Gm12878, Bj, Ag04450, A549, Sknshra	None	ANNOTATED, CDS, coding, INTERNAL, OVCODE, OVEXON	NM_001079811	GLB1	Jeck2013, Memczak2013, Salzman2013
chr21_34799191_34805178_+	hsa_circ_0008725	5988	467	Hs68_RNase, Hs68_control	None	ANNOTATED, CDS, coding, INTERNAL, OVCODE, OVERLAPTX, OVEXON	NM_005534	IFNGR2	Jeck2013
chr21_17205667_17214859_+	hsa_circ_0005238	9193	344	Hs68_RNase, Hs68_control, Nhek, K562, Ag04450	None	ANNOTATED, CDS, coding, INTERNAL, OVCODE, OVEXON	NM_013396	USP25	Jeck2013, Salzman2013
chr16_11857334_11859541_-	hsa_circ_0003769	2208	480	Hs68_RNase, Hs68_control, K562	None	ANNOTATED, CDS, coding, INTERNAL, OVCODE, OVEXON	NM_014153	ZC3H7A	Jeck2013, Salzman2013
chr1_247322308_247323115_-	hsa_circ_0017348	808	188	Nhek, K562, Huvec, Helas3, H1hesc, Gm12878, Bj, Ag04450, A549, Sknshra	NA	ANNOTATED, CDS, coding, INTERNAL, OVCODE, OVEXON	NM_001243740	ZNF124	Salzman2013
chr7_104678573_104707254_+	hsa_circ_0081808	28682	685	K562, Hepg2	NA	ANNOTATED, CDS, coding, INTERNAL, OVCODE, OVERLAPTX, OVEXON, UTR5	NM_182931	MLL5	Salzman2013
chr6_25605040_25606501_+	hsa_circ_0075881	1462	295	Hepg2, Helas3, H1hesc, Gm12878, Bj, A549, Nhek	NA	ANNOTATED, CDS, coding, INTERNAL, OVCODE, OVEXON	NM_017640	LRRC16A	Salzman2013
chr17_6493099_6503778_-	hsa_circ_0041739	10680	777	Hepg2, H1hesc, Bj, Ag04450, A549, Sknshra	NA	ANNOTATED, CDS, coding, INTERNAL, OVCODE, OVEXON	NM_014804	KIAA0753	Salzman2013
chr20_2967411_2969120_+	hsa_circ_0001127	1710	296	cd_34, Nhek, K562, Hmec, Helas3, H1hesc, Gm12878, Bj, Ag04450, A549	None	ANNOTATED, CDS, coding, INTERNAL	NM_080841	PTPRA	Memczak2013, Salzman2013
chr16_14738131_14738466_+	hsa_circ_0009065	336	336	Hs68_RNase, Hs68_control, Nhek, K562, Hepg2, Helas3, H1hesc, Gm12878, Bj, Ag04450, Sknshra	None	ANNOTATED, CDS, coding, INTERNAL, OVCODE, OVEXON, UTR5	NM_016561	BFAR	Jeck2013, Salzman2013
chr3_31617888_31641951_+	hsa_circ_0003338	24064	563	Hs68_RNase, Hs68_control, K562, Huvec, Hepg2, Helas3, H1hesc, Gm12878, Bj, Ag04450, A549, Sknshra	None	ANNOTATED, CDS, coding, INTERNAL, OVCODE, OVEXON	NM_178862	STT3B	Jeck2013, Salzman2013
chr7_2414163_2416710_+	hsa_circ_0079179	2548	344	Hepg2, Gm12878, Bj, Ag04450	NA	ANNOTATED, CDS, coding, INTERNAL, OVCODE, OVERLAPTX, OVEXON	NM_001037283	EIF3B	Salzman2013
chr1_89236035_89251896_+	hsa_circ_0005900	15862	777	Hs68_RNase, Hs68_control, Helas3, Bj, Ag04450, Sknshra	None	ANNOTATED, CDS, coding, INTERNAL, OVCODE, OVEXON	NM_006256	PKN2	Jeck2013, Salzman2013
chr10_882343_890995_-	hsa_circ_0008837	8653	320	Hs68_RNase, Hs68_control	None	ANNOTATED, CDS, coding, INTERNAL, OVCODE, OVEXON	NM_015155	LARP4B	Jeck2013
chr6_147581751_147588303_+	hsa_circ_0007828	6553	283	Hs68_RNase, Hs68_control, K562, Helas3, Ag04450, Nhek	None	ANNOTATED, CDS, coding, INTERNAL, OVCODE, OVEXON	NM_001127715	STXBP5	Jeck2013, Salzman2013
chr13_64564229_64608670_-	hsa_circ_0030388	44442	442	K562, Helas3, H1hesc, Gm12878	SINE	ANNOTATED, ncRNA, OVEXON	TCONS_l2_00007569	TCONS_l2_00007569	Salzman2013
chr9_134514022_134526336_-	hsa_circ_0089252	12315	590	K562, Hsmm, Hepg2, Helas3, H1hesc, Gm12878, Ag04450, A549, Sknshra, Mcf7	NA	ANNOTATED, CDS, coding, INTERNAL, OVCODE, OVEXON	NM_198679	RAPGEF1	Salzman2013
chr1_22074631_22079612_-	hsa_circ_0000029	4982	496	cd_34	None	ANNOTATED, CDS, coding, INTERNAL	NM_001032730	USP48	Memczak2013
chr7_155457869_155473602_+	hsa_circ_0001771	15734	524	cd_19, Nhek, K562, Huvec, Helas3, Gm12878, Bj, Ag04450, A549, Sknshra	None	ANNOTATED, CDS, coding, INTERNAL	NM_053043	RBM33	Memczak2013, Salzman2013
chr7_148529726_148544397_-	hsa_circ_0008324	14672	370	Hs68_RNase, Hs68_control, K562, Hepg2, Helas3, Bj, Ag04450, A549, Sknshra	None	ANNOTATED, CDS, coding, INTERNAL, OVCODE, OVEXON, UTR5	NM_004456	EZH2	Jeck2013, Salzman2013
chr1_46290105_46295253_+	hsa_circ_0012277	5149	291	Nhek, Hepg2, Helas3, H1hesc, Ag04450, A549	NA	ANNOTATED, CDS, coding, INTERNAL, OVCODE, OVEXON	NM_015112	MAST2	Salzman2013
chr7_73770740_73771807_+	hsa_circ_0002755	1068	412	Hs68_RNase, Hs68_control, K562, Huvec, Hsmm, Hepg2, Helas3, H1hesc, Gm12878, Bj, Ag04450, A549, Nhlf, Sknshra	None	ANNOTATED, CDS, coding, INTERNAL, OVCODE, OVEXON	NM_003388	CLIP2	Jeck2013, Salzman2013
chr8_141595218_141616013_-	hsa_circ_0007313	20796	20796	Hs68_RNase, Hs68_control	None	ALT_ACCEPTOR, CDS, coding, INTERNAL, intronic, OVCODE, OVEXON	NM_012154	EIF2C2	Jeck2013
chr1_211526581_211527809_+	hsa_circ_0007234	1229	277	Hs68_RNase, Hs68_control, Nhek, K562, Huvec, Hepg2, Helas3, H1hesc, Gm12878, Bj, Ag04450, A549, Nhlf, Sknshra, Mcf7	None	ANNOTATED, CDS, coding, INTERNAL, OVCODE, OVEXON, UTR5	NM_001033910	TRAF5	Jeck2013, Salzman2013
chr4_103635595_103647840_-	hsa_circ_0001432	12246	496	cd_19, neutr, Hs68_RNase, Hs68_control, K562, Helas3, H1hesc, Gm12878, Bj, Ag04450, A549, Nhek, Sknshra	None	ANNOTATED, CDS, coding, INTERNAL, OVCODE, OVEXON	NM_005908	MANBA	Jeck2013, Memczak2013, Salzman2013
chr1_1747195_1756938_-	hsa_circ_0000008	9744	249	cd_19, Hs68_RNase, Hs68_control, Nhek, K562, Hepg2, Helas3, H1hesc, Gm12878, Bj, Ag04450, A549, Sknshra	None	ANNOTATED, CDS, coding, INTERNAL, OVCODE, OVEXON, UTR5	NM_002074	GNB1	Jeck2013, Memczak2013, Salzman2013
chr2_241492331_241494472_-	hsa_circ_0005059	2142	334	Hs68_RNase, Hs68_control, Nhek, K562, Helas3, Gm12878, Bj, A549	None	ANNOTATED, CDS, coding, INTERNAL, OVCODE, OVEXON, UTR5	NM_016552	ANKMY1	Jeck2013, Salzman2013
chr13_80094945_80113910_+	hsa_circ_0030548	18966	394	K562, Hepg2, H1hesc, Gm12878, Ag04450, A549	NA	ANNOTATED, CDS, coding, INTERNAL, OVCODE, OVEXON	NM_019080	NDFIP2	Salzman2013
chr18_45391430_45423180_-	hsa_circ_0000847	31751	783	cd_19, neutr, Hs68_RNase, Hs68_control, Nhek, K562, Hepg2, Helas3, H1hesc, Gm12878, Bj, Ag04450, A549, Sknshra	None	ANNOTATED, CDS, coding, INTERNAL, OVCODE, OVEXON, UTR5	NM_001003652	SMAD2	Jeck2013, Memczak2013, Salzman2013
chr12_110819557_110834257_-	hsa_circ_0005785	14701	1031	Hs68_RNase, Hs68_control, Nhek, K562, Huvec, Hsmm, Hepg2, Helas3, H1hesc, Gm12878, Bj, Ag04450, A549, Sknshra, Mcf7	None	ANNOTATED, CDS, coding, INTERNAL, OVCODE, OVEXON	NM_016238	ANAPC7	Jeck2013, Salzman2013
chr19_6230581_6270770_-	hsa_circ_0004594	40190	408	Hs68_RNase, Hs68_control	None	ANNOTATED, CDS, coding, INTERNAL, OVCODE, OVEXON	NM_005934	MLLT1	Jeck2013
chr14_76638186_76647192_+	hsa_circ_0003819	9007	466	Hs68_RNase, Hs68_control, Nhek, K562, Hepg2, Helas3, Gm12878, Mcf7	None	ANNOTATED, CDS, coding, INTERNAL, OVCODE, OVEXON	NM_017926	C14orf118	Jeck2013, Salzman2013
chr5_178994462_179004137_+	hsa_circ_0075269	9676	288	K562, H1hesc, Gm12878, A549, Sknshra	NA	ANNOTATED, CDS, coding, INTERNAL, OVCODE, OVEXON	NM_025158	RUFY1	Salzman2013
chr13_103468778_103474509_+	hsa_circ_0006288	5732	423	Hs68_RNase, Hs68_control	None	ANNOTATED, CDS, coding, INTERNAL, OVCODE, OVEXON	NM_001204425	BIVM-ERCC5	Jeck2013
chr11_125513687_125514538_+	hsa_circ_0005468	852	419	Hs68_RNase, Hs68_control	None	ANNOTATED, CDS, coding, INTERNAL, OVCODE, OVEXON	NM_001114122	CHEK1	Jeck2013
chr11_47505941_47510576_-	hsa_circ_0022007	4636	455	H1hesc, A549	NA	ANNOTATED, CDS, coding, INTERNAL, OVCODE, OVERLAPTX, OVEXON, UTR5	NM_006560	CELF1	Salzman2013
chr18_8076453_8143777_+	hsa_circ_0007144	67325	859	Hs68_RNase, Hs68_control, Hepg2, Bj, A549	None	ANNOTATED, CDS, coding, INTERNAL, OVCODE, OVEXON	NM_001105244	PTPRM	Jeck2013, Salzman2013
chr14_69583083_69589077_-	hsa_circ_0007392	5995	451	Hs68_RNase, Hs68_control, Nhek, K562, Ag04450, A549	None	ANNOTATED, CDS, coding, INTERNAL, OVCODE, OVEXON	NM_003861	DCAF5	Jeck2013, Salzman2013
chr3_179418796_179426745_+	hsa_circ_0004838	7950	450	Hs68_RNase, Hs68_control	None	ANNOTATED, CDS, coding, INTERNAL, OVCODE, OVEXON	NM_003940	USP13	Jeck2013
chr4_169812073_169837178_+	hsa_circ_0071410	25106	886	Hsmm, A549	NA	ANNOTATED, CDS, coding, INTERNAL, OVCODE, OVERLAPTX, OVEXON	NM_001166108	PALLD	Salzman2013
chr7_23015829_23030758_-	hsa_circ_0005251	14930	654	Hs68_RNase, Hs68_control, Nhek, K562, Helas3, H1hesc, Gm12878, Bj, Ag04450, A549, Mcf7	None	ANNOTATED, CDS, coding, INTERNAL, OVCODE, OVEXON, UTR5	NM_032581	FAM126A	Jeck2013, Salzman2013
chr14_23502577_23502883_-	hsa_circ_0008758	307	307	Hs68_RNase, Hs68_control, Nhek, K562, Huvec, Hepg2, Helas3, H1hesc, Gm12878, Bj, Ag04450, A549, Nhlf	None	ANNOTATED, CDS, coding, INTERNAL, OVCODE, OVEXON	NM_001144932	PSMB5	Jeck2013, Salzman2013
chr3_47466975_47476627_-	hsa_circ_0065214	9653	915	K562, Hepg2, Helas3, H1hesc, Gm12878, Bj, Ag04450, A549, Sknshra, Mcf7	NA	ANNOTATED, CDS, coding, INTERNAL, OVCODE, OVEXON	NM_012235	SCAP	Salzman2013
chr12_102419752_102439897_-	hsa_circ_0008051	20146	350	Hs68_RNase, Hs68_control	None	ANNOTATED, CDS, coding, INTERNAL, OVCODE, OVEXON	NM_016053	CCDC53	Jeck2013
chr1_41474466_41475926_+	hsa_circ_0008296	1461	336	Hs68_RNase, Hs68_control, Huvec, Helas3, Gm12878, Bj, Ag04450, A549, Sknshra	None	ANNOTATED, CDS, coding, INTERNAL, OVCODE, OVEXON, UTR3	NM_001905	CTPS	Jeck2013, Salzman2013
chr4_140046318_140089196_-	hsa_circ_0008825	42879	29034	Hs68_RNase, Hs68_control	LTR	ALT_ACCEPTOR, CDS, coding, OVCODE, OVEXON, upstream_start, UTR5	NM_201999	ELF2	Jeck2013
chr10_95140976_95148911_-	hsa_circ_0005898	7936	420	Hs68_RNase, Hs68_control, Nhek, Hepg2, Helas3, Bj, Ag04450, A549, Mcf7	None	ANNOTATED, CDS, coding, INTERNAL, OVCODE, OVEXON	NM_013451	MYOF	Jeck2013, Salzman2013
chr7_102665510_102669865_-	hsa_circ_0007375	4356	495	Hs68_RNase, Hs68_control	None	ANNOTATED, CDS, coding, INTERNAL, OVCODE, OVEXON	NM_145032	FBXL13	Jeck2013
chr3_9792629_9793633_+	hsa_circ_0008027	1005	428	Hs68_RNase, Hs68_control, Nhek, K562, Huvec, Hepg2, Helas3, H1hesc, Gm12878, Bj, Ag04450, A549, Sknshra, Mcf7	None	ANNOTATED, CDS, coding, INTERNAL, OVCODE, OVEXON	NM_016828	OGG1	Jeck2013, Salzman2013
chr3_126360875_126366139_-	hsa_circ_0002409	5265	469	Hs68_RNase, Hs68_control, Hepg2	None	ANNOTATED, CDS, coding, INTERNAL, OVCODE, OVEXON	NM_052883	TXNRD3	Jeck2013, Salzman2013
chr17_7351898_7352107_+	hsa_circ_0041850	210	210	Nhek, K562, Hepg2, Helas3, H1hesc, Bj, Ag04450, A549, Sknshra	NA	ANNOTATED, CDS, coding, INTERNAL, OVCODE, OVEXON	NM_000747	CHRNB1	Salzman2013
chr9_119380603_119382722_-	hsa_circ_0088265	2120	283	Helas3, H1hesc	NA	ANNOTATED, CDS, coding, INTERNAL, OVCODE, OVEXON	NM_014010	ASTN2	Salzman2013
chr2_191523884_191535185_+	hsa_circ_0057510	11302	972	K562, Hepg2	NA	ANNOTATED, CDS, coding, INTERNAL, OVCODE, OVERLAPTX, OVEXON, UTR5	NM_005966	NAB1	Salzman2013
chr10_70218861_70229920_-	hsa_circ_0009172	11060	645	Hs68_RNase, Hs68_control, K562, Hepg2, H1hesc, Gm12878, Ag04450, A549, Sknshra	None	ANNOTATED, CDS, coding, INTERNAL, OVCODE, OVEXON	NM_001080449	DNA2	Jeck2013, Salzman2013
chr7_155465561_155473602_+	hsa_circ_0001772	8042	445	cd_19, cd_34, neutr, Hs68_RNase, Hs68_control, Nhek, K562, Huvec, Hepg2, Helas3, Gm12878, Bj, Ag04450, A549, Sknshra	None	ANNOTATED, CDS, coding, INTERNAL, OVCODE, OVEXON	NM_053043	RBM33	Jeck2013, Memczak2013, Salzman2013
chr17_42231921_42232779_+	hsa_circ_0004239	859	324	Hs68_RNase, Hs68_control	None	ANNOTATED, CDS, coding, INTERNAL, OVCODE, OVEXON	NM_024032	C17orf53	Jeck2013
chr15_66641398_66641775_-	hsa_circ_0008988	378	187	Hs68_RNase, Hs68_control, Nhek, K562, Huvec, Hepg2, Gm12878, Ag04450, A549, Nhlf, Sknshra	None	ANNOTATED, CDS, coding, INTERNAL, OVCODE, OVEXON	NM_017858	TIPIN	Jeck2013, Salzman2013
chr16_53907698_53922863_+	hsa_circ_0005941	15166	344	Hs68_RNase, Hs68_control, Nhek, K562, Hepg2, Helas3, H1hesc, Gm12878, Bj, Ag04450, A549, Sknshra	None	ANNOTATED, CDS, coding, INTERNAL, OVCODE, OVEXON	NM_001080432	FTO	Jeck2013, Salzman2013
chr3_149589816_149629870_+	hsa_circ_0067723	40055	411	Helas3, H1hesc	NA	ANNOTATED, CDS, coding, INTERNAL, OVCODE, OVEXON	NM_007282	RNF13	Salzman2013
chr2_53941521_53943880_-	hsa_circ_0003959	2360	376	Hs68_RNase, Hs68_control, Nhek, K562, Hepg2, Helas3, Bj, Sknshra	None	ANNOTATED, CDS, coding, INTERNAL, OVCODE, OVEXON	NM_001201965	ASB3	Jeck2013, Salzman2013
chr7_44714010_44715748_+	hsa_circ_0001701	1739	418	cd_19, neutr, Hs68_RNase, Hs68_control, Helas3, Sknshra	None	ANNOTATED, CDS, coding, INTERNAL, OVCODE, OVEXON	NM_002541	OGDH	Jeck2013, Memczak2013, Salzman2013
chr13_114817527_114839312_-	hsa_circ_0003750	21786	222	Hs68_RNase, Hs68_control, K562, Hsmm	None	ANNOTATED, CDS, coding, INTERNAL, OVCODE, OVEXON	NM_007368	RASA3	Jeck2013, Salzman2013
chr1_179959642_179961356_+	hsa_circ_0015466	1715	275	K562	NA	ANNOTATED, CDS, coding, INTERNAL, OVCODE, OVEXON	NM_014810	CEP350	Salzman2013
chr3_47762156_47787483_-	hsa_circ_0065301	25328	401	K562, Helas3, H1hesc, Gm12878, Bj, Ag04450, A549, Sknshra	NA	ANNOTATED, CDS, coding, INTERNAL, OVCODE, OVEXON	NM_003074	SMARCC1	Salzman2013
chr10_79613112_79614128_-	hsa_circ_0006649	1017	328	Hs68_RNase, Hs68_control, Nhek, Huvec, Hepg2, Helas3, H1hesc, Gm12878, Bj, Ag04450, A549, Sknshra	None	ANNOTATED, CDS, coding, INTERNAL, OVCODE, OVEXON	NM_004747	DLG5	Jeck2013, Salzman2013
chr16_66839680_66839929_-	hsa_circ_0002604	250	165	Hs68_RNase, Hs68_control	None	ANNOTATED, CDS, coding, INTERNAL, OVCODE, OVEXON	NM_001018159	NAE1	Jeck2013
chr3_141087463_141122873_+	hsa_circ_0007714	35411	738	Hs68_RNase, Hs68_control	None	ANNOTATED, coding, INTERNAL, OVEXON, UTR5	NM_001080412	ZBTB38	Jeck2013
chr1_16474873_16475542_-	hsa_circ_0010131	670	670	Nhek, Hepg2, Ag04450, Nhlf	NA	ANNOTATED, CDS, coding, INTERNAL, OVCODE, OVEXON	NM_004431	EPHA2	Salzman2013
chr15_94841430_94841959_+	hsa_circ_0000657	530	530	cd_34, neutr, Hs68_RNase, Hs68_control, Nhek, Hepg2, Gm12878, Ag04450	None	ANNOTATED, CDS, coding, OVCODE, OVEXON, UTR5	NM_001159643	MCTP2	Jeck2013, Memczak2013, Salzman2013
chr1_171492360_171496983_+	hsa_circ_0003644	4624	421	Hs68_RNase, Hs68_control, Nhek, K562, Huvec, Hepg2, H1hesc, Bj, Ag04450, A549, Sknshra	None	ANNOTATED, CDS, coding, INTERNAL, OVCODE, OVEXON	NM_015172	PRRC2C	Jeck2013, Salzman2013
chr17_3967655_3968123_-	hsa_circ_0041501	469	469	K562, Hepg2, Helas3, Gm12878, Ag04450, Sknshra	NA	ANNOTATED, CDS, coding, INTERNAL, OVCODE, OVEXON	NM_015113	ZZEF1	Salzman2013
chr2_219613559_219614110_+	hsa_circ_0058318	552	234	K562, Huvec, Ag04450	NA	ANNOTATED, CDS, coding, INTERNAL, OVCODE, OVEXON	NM_014640	TTLL4	Salzman2013
chr6_64356432_64356700_+	hsa_circ_0008878	269	269	Hs68_RNase, Hs68_control, K562, Hepg2, Gm12878	None	ALT_ACCEPTOR, CDS, coding, INTERNAL, OVCODE, OVEXON, UTR5	NM_015153	PHF3	Jeck2013, Salzman2013
chr2_9028148_9098771_-	hsa_circ_0008847	70624	376	Hs68_RNase, Hs68_control, Nhek, K562, Huvec, Hsmm, Hepg2, H1hesc, Gm12878, Bj, Ag04450, A549, Nhlf, Sknshra, Mcf7	None	ANNOTATED, CDS, coding, INTERNAL, OVCODE, OVEXON	NM_138799	MBOAT2	Jeck2013, Salzman2013
chr9_128305338_128322088_-	hsa_circ_0088598	16751	287	Gm12878	NA	ANNOTATED, CDS, coding, INTERNAL, OVCODE, OVERLAPTX, OVEXON	NM_001006617	MAPKAP1	Salzman2013
chr6_35586873_35610620_-	hsa_circ_0001599	23748	527	cd_19, Hs68_RNase, Hs68_control, K562, H1hesc, Gm12878	None	ANNOTATED, CDS, coding, INTERNAL, OVCODE, OVEXON, UTR5	NM_001145776	FKBP5	Jeck2013, Memczak2013, Salzman2013
chr19_33134029_33134537_-	hsa_circ_0000924	509	257	cd_19, Hs68_RNase, Hs68_control, Nhek, K562, Helas3, H1hesc, Gm12878, A549, Sknshra	None	ANNOTATED, CDS, coding, INTERNAL, OVCODE, OVEXON	NM_032139	ANKRD27	Jeck2013, Memczak2013, Salzman2013
chr5_134032816_134033747_+	hsa_circ_0073992	932	280	K562, Gm12878, Ag04450	NA	ANNOTATED, CDS, coding, INTERNAL, OVCODE, OVEXON	NM_021982	SEC24A	Salzman2013
chr5_138994171_139003046_+	hsa_circ_0074229	8876	310	K562, Huvec, H1hesc, Gm12878, Bj, Ag04450, Nhek, Sknshra, Mcf7	NA	ANNOTATED, CDS, coding, INTERNAL, OVCODE, OVERLAPTX, OVEXON	NM_181838	UBE2D2	Salzman2013
chr10_73887840_73892939_-	hsa_circ_0008195	5100	211	Hs68_RNase, Hs68_control, K562, Sknshra	None	ANNOTATED, CDS, coding, INTERNAL, OVCODE, OVEXON	NM_001198799	ASCC1	Jeck2013, Salzman2013
chr11_3794862_3797251_-	hsa_circ_0004960	2390	248	Hs68_RNase, Hs68_control, K562, Hepg2, Helas3, H1hesc, Gm12878, Bj, Ag04450, A549, Nhek	None	ANNOTATED, CDS, coding, INTERNAL, OVCODE, OVEXON	NM_016320	NUP98	Jeck2013, Salzman2013
chr13_95858786_95863035_-	hsa_circ_0006318	4250	630	Hs68_RNase, Hs68_control, K562, Hsmm, Helas3, H1hesc, Gm12878, Bj, Ag04450, A549, Nhlf, Sknshra	None	ANNOTATED, CDS, coding, INTERNAL, OVCODE, OVEXON	NM_005845	ABCC4	Jeck2013, Salzman2013
chr21_34787195_34805178_+	hsa_circ_0002660	17984	806	Hs68_RNase, Hs68_control	None	ANNOTATED, CDS, coding, INTERNAL, OVCODE, OVERLAPTX, OVEXON	NM_005534	IFNGR2	Jeck2013
chr6_97715748_97720938_-	hsa_circ_0077409	5191	488	K562, Gm12878, Ag04450, Nhek, Sknshra	NA	ANNOTATED, CDS, coding, INTERNAL, OVCODE, OVEXON	NM_198468	MMS22L	Salzman2013
chr10_64148155_64219556_+	hsa_circ_0018457	71402	238	Bj	NA	ANNOTATED, CDS, coding, INTERNAL, OVCODE, OVEXON	NM_199451	ZNF365	Salzman2013
chr2_72958136_72960247_-	hsa_circ_0001030	2112	185	cd_19, Nhek, K562, Hepg2, Helas3, Gm12878, Bj, Ag04450, A549, Sknshra	None	ANNOTATED, CDS, coding, INTERNAL	NM_015189	EXOC6B	Memczak2013, Salzman2013
chr10_5827105_5842668_-	hsa_circ_0005379	15564	674	Hs68_RNase, Hs68_control, Nhek, K562, Hepg2, Helas3, H1hesc, Ag04450, A549, Sknshra	None	ANNOTATED, CDS, coding, INTERNAL, OVCODE, OVEXON	NM_001494	GDI2	Jeck2013, Salzman2013
chr12_53421566_53421972_+	hsa_circ_0007889	407	312	Hs68_RNase, Hs68_control, Nhek, K562, H1hesc, Gm12878, Bj, Ag04450, A549, Sknshra	None	ANNOTATED, CDS, coding, INTERNAL, OVCODE, OVEXON	NM_001417	EIF4B	Jeck2013, Salzman2013
chr1_220179448_220180680_-	hsa_circ_0007739	1233	345	Hs68_RNase, Hs68_control, Nhek, K562, Gm12878, Sknshra	None	ANNOTATED, CDS, coding, INTERNAL, OVCODE, OVERLAPTX, OVEXON	NM_004446	EPRS	Jeck2013, Salzman2013
chr12_27077288_27081838_-	hsa_circ_0025694	4551	504	K562	NA	ANNOTATED, CDS, coding, INTERNAL, OVCODE, OVEXON	NM_018164	C12orf11	Salzman2013
chr1_155895423_155896947_-	hsa_circ_0014642	1525	429	K562, Helas3, H1hesc, A549	NA	ANNOTATED, CDS, coding, INTERNAL, OVCODE, OVEXON	NM_014949	KIAA0907	Salzman2013
chr4_48686690_48712715_-	hsa_circ_0002021	26026	303	Hs68_RNase, Hs68_control, K562, Hepg2, Helas3, H1hesc, Gm12878, Bj, Ag04450, A549, Nhek	None	ANNOTATED, coding, INTERNAL, OVEXON, UTR5	NM_015030	FRYL	Jeck2013, Salzman2013
chr22_28910745_28915308_-	hsa_circ_0006776	4564	4564	Hs68_RNase, Hs68_control	None	ALT_ACCEPTOR, ALT_DONOR, coding, INTERNAL, intronic	NM_001145418	TTC28	Jeck2013
chr6_34789430_34789732_+	hsa_circ_0076054	303	202	K562, Hepg2, Helas3, Gm12878, Bj, A549	NA	ANNOTATED, CDS, coding, INTERNAL, OVCODE, OVEXON	NM_017754	UHRF1BP1	Salzman2013
chr11_10019813_10024236_-	hsa_circ_0007055	4424	356	Hs68_RNase, Hs68_control, Bj, Nhek, Sknshra	None	ANNOTATED, CDS, coding, INTERNAL, OVCODE, OVEXON	NM_030962	SBF2	Jeck2013, Salzman2013
chr1_21377359_21437876_-	hsa_circ_0000026	60518	266	HEK293, Hs68_RNase, Hs68_control, Nhek, K562, Hepg2, Helas3, H1hesc, Gm12878, Bj, Ag04450, A549, Sknshra, Mcf7	SINE	ANNOTATED, coding, INTERNAL, OVEXON, UTR5	NM_001198803	EIF4G3	Jeck2013, Memczak2013, Salzman2013
chr19_3660964_3661999_-	hsa_circ_0000871	1036	249	cd_34, Hs68_RNase, Hs68_control, Nhek, K562, Huvec, Hsmm, Hepg2, Helas3, H1hesc, Gm12878, Bj, Ag04450, A549, Sknshra, Mcf7	None	ANNOTATED, CDS, coding, INTERNAL, OVCODE, OVEXON	NM_001195733	PIP5K1C	Jeck2013, Memczak2013, Salzman2013
chr3_81627076_81630426_-	hsa_circ_0066579	3351	283	K562	NA	ANNOTATED, CDS, coding, INTERNAL, OVCODE, OVEXON	NM_000158	GBE1	Salzman2013
chr20_21195173_21196286_+	hsa_circ_0059577	1114	232	K562, Hepg2, Helas3, H1hesc, Gm12878	NA	ANNOTATED, CDS, coding, INTERNAL, OVCODE, OVERLAPTX, OVEXON	NM_018474	PLK1S1	Salzman2013
chr12_76461151_76468019_-	hsa_circ_0002366	6869	226	Hs68_RNase, Hs68_control, K562	None	ANNOTATED, CDS, coding, INTERNAL, OVCODE, OVEXON, UTR5	NM_004537	NAP1L1	Jeck2013, Salzman2013
chrX_46712911_46719537_+	hsa_circ_0005316	6627	781	Hs68_RNase, Hs68_control	None	ANNOTATED, CDS, coding, INTERNAL, OVCODE, OVEXON	NM_006915	RP2	Jeck2013
chr2_64796226_64800202_+	hsa_circ_0054963	3977	307	Bj	NA	ANNOTATED, CDS, coding, INTERNAL, OVCODE, OVEXON	NM_203437	AFTPH	Salzman2013
chr10_126799559_126811437_-	hsa_circ_0004875	11879	11879	Hs68_RNase, Hs68_control	None	ALT_ACCEPTOR, coding, INTERNAL, intronic, OVEXON, UTR5	NM_001083914	CTBP2	Jeck2013
chr15_43670045_43675702_+	hsa_circ_0034960	5658	339	Nhek, K562	NA	ANNOTATED, CDS, coding, INTERNAL, OVCODE, OVEXON	NM_014444	TUBGCP4	Salzman2013
chr13_20235838_20244503_+	hsa_circ_0029605	8666	666	K562, Hepg2, Helas3, Bj, Ag04450, Nhlf, Mcf7	NA	ANNOTATED, CDS, coding, INTERNAL, OVCODE, OVERLAPTX, OVEXON	NM_017520	MPHOSPH8	Salzman2013
chr5_131052258_131080383_-	hsa_circ_0003721	28126	530	Hs68_RNase, Hs68_control	None	ANNOTATED, CDS, coding, INTERNAL, OVCODE, OVEXON	NM_133372	FNIP1	Jeck2013
chr2_122283421_122287901_-	hsa_circ_0056319	4481	351	K562, Gm12878, Bj, Ag04450	NA	ANNOTATED, CDS, coding, INTERNAL, OVCODE, OVEXON	NM_015282	CLASP1	Salzman2013
chr17_526773_565135_-	hsa_circ_0008740	38363	831	Hs68_RNase, Hs68_control, K562, Hepg2	None	ANNOTATED, CDS, coding, INTERNAL, OVCODE, OVEXON	NM_001128159	VPS53	Jeck2013, Salzman2013
chr3_169863211_169867032_-	hsa_circ_0001360	3822	258	HEK293, cd_34, Hs68_RNase, Hs68_control, Nhek, K562, Huvec, Hsmm, Hepg2, Helas3, H1hesc, Gm12878, Bj, Ag04450, A549, Nhlf, Sknshra, Mcf7	None	ANNOTATED, CDS, coding, INTERNAL, OVCODE, OVEXON	NM_024947	PHC3	Jeck2013, Memczak2013, Salzman2013
chr12_69090599_69096564_+	hsa_circ_0027471	5966	281	K562, Hepg2, Gm12878, Bj	NA	ANNOTATED, CDS, coding, INTERNAL, OVCODE, OVEXON	NM_020401	NUP107	Salzman2013
chr13_113170754_113181798_-	hsa_circ_0000504	11045	751	HEK293, cd_19, Hs68_RNase, Hs68_control, Nhek, K562, Huvec, Hepg2, Helas3, H1hesc, Gm12878, Bj, Ag04450, A549, Sknshra, Mcf7	None	ANNOTATED, CDS, coding, INTERNAL, OVCODE, OVEXON	NM_006322	TUBGCP3	Jeck2013, Memczak2013, Salzman2013
chr3_142455221_142467302_+	hsa_circ_0001345	12082	460	HEK293, Hs68_RNase, Hs68_control, K562, Helas3, H1hesc, Bj, Ag04450, A549, Sknshra	None	ANNOTATED, CDS, coding, INTERNAL, OVCODE, OVEXON	NM_001251845	TRPC1	Jeck2013, Memczak2013, Salzman2013
chr13_28155434_28155940_-	hsa_circ_0029827	507	507	Nhek, K562, Hepg2, H1hesc, Ag04450	NA	ANNOTATED, CDS, coding, INTERNAL, OVCODE, OVEXON, UTR5	NM_153371	LNX2	Salzman2013
chr11_120343759_120348235_+	hsa_circ_0009021	4477	577	Hs68_RNase, Hs68_control, K562, Huvec, Hepg2, H1hesc, Gm12878, Bj, Ag04450, A549, Nhek, Sknshra	None	ANNOTATED, CDS, coding, INTERNAL, OVCODE, OVEXON	NM_015313	ARHGEF12	Jeck2013, Salzman2013
chr19_34942886_34955036_+	hsa_circ_0008813	12151	733	Hs68_RNase, Hs68_control, Nhek, K562, Gm12878, Ag04450, A549, Sknshra	None	ANNOTATED, CDS, coding, INTERNAL, OVCODE, OVEXON	NM_005499	UBA2	Jeck2013, Salzman2013
chr10_62021617_62039397_-	hsa_circ_0018440	17781	684	Sknshra	NA	ANNOTATED, CDS, coding, INTERNAL, OVCODE, OVERLAPTX, OVEXON	NM_020987	ANK3	Salzman2013
chrX_299339_322325_-	hsa_circ_0089775	22987	22987	Hepg2	Simple_repeat	INTERGENIC	None	None	Salzman2013
chr12_111990084_111993723_-	hsa_circ_0002457	3640	320	Hs68_RNase, Hs68_control, Nhek, K562, H1hesc, Gm12878, Bj, Ag04450, A549, Sknshra	None	ANNOTATED, CDS, coding, INTERNAL, OVCODE, OVEXON	NM_002973	ATXN2	Jeck2013, Salzman2013
chr3_124560230_124567405_-	hsa_circ_0067079	7176	419	H1hesc, A549	NA	ANNOTATED, CDS, coding, INTERNAL, OVCODE, OVEXON	NM_002213	ITGB5	Salzman2013
chr2_25830105_25851253_-	hsa_circ_0053040	21149	300	Hepg2, Helas3, H1hesc, Ag04450, A549	NA	ANNOTATED, CDS, coding, INTERNAL, OVCODE, OVEXON	NM_021907	DTNB	Salzman2013
chr20_62421174_62422143_-	hsa_circ_0061179	970	970	K562, Hepg2, Helas3, H1hesc	NA	ANNOTATED, CDS, coding, INTERNAL, OVCODE, OVEXON, UTR5	NM_025224	ZBTB46	Salzman2013
chr7_92932772_92940584_+	hsa_circ_0006843	7813	494	Hs68_RNase, Hs68_control	None	ANNOTATED, CDS, coding, INTERNAL, OVCODE, OVEXON	NM_017667	CCDC132	Jeck2013
chr9_96233423_96261168_+	hsa_circ_0001875	27746	556	neutr, Hs68_RNase, Hs68_control, K562, Huvec, Hepg2, Helas3, H1hesc, Gm12878, Bj, Ag04450, A549, Nhek, Sknshra, Mcf7	None	ANNOTATED, CDS, coding, INTERNAL, OVCODE, OVEXON	NM_014612	FAM120A	Jeck2013, Memczak2013, Salzman2013
chr13_114541042_114542823_-	hsa_circ_0031054	1782	246	Hsmm, Ag04450	NA	ANNOTATED, CDS, coding, INTERNAL, OVCODE, OVERLAPTX, OVEXON	NM_000820	GAS6	Salzman2013
chr7_22306583_22357656_-	hsa_circ_0079557	51074	565	Hepg2, Helas3, H1hesc, A549, Sknshra	NA	ANNOTATED, CDS, coding, INTERNAL, OVCODE, OVERLAPTX, OVEXON, UTR5	NM_012294	RAPGEF5	Salzman2013
chr1_48821342_48825442_-	hsa_circ_0008202	4101	285	Hs68_RNase, Hs68_control, Helas3, H1hesc, Ag04450, Sknshra	None	ANNOTATED, CDS, coding, INTERNAL, OVCODE, OVEXON	NM_019073	SPATA6	Jeck2013, Salzman2013
chr16_88014642_88017865_+	hsa_circ_0040813	3224	292	Gm12878, A549	NA	ANNOTATED, CDS, coding, INTERNAL, OVCODE, OVEXON	NM_001173542	BANP	Salzman2013
chr1_41578955_41582682_-	hsa_circ_0004628	3728	333	Hs68_RNase, Hs68_control, Nhek, K562, Hepg2, Helas3, H1hesc, Gm12878, Bj, Ag04450, A549, Sknshra	None	ANNOTATED, CDS, coding, INTERNAL, OVCODE, OVEXON	NM_001172218	SCMH1	Jeck2013, Salzman2013
chr3_196094899_196129890_-	hsa_circ_0068648	34992	613	H1hesc, Gm12878	NA	ANNOTATED, CDS, coding, INTERNAL, OVCODE, OVERLAPTX, OVEXON	NM_015562	UBXN7	Salzman2013
chr9_78638654_78641953_+	hsa_circ_0087230	3300	221	H1hesc	NA	ANNOTATED, CDS, coding, INTERNAL, OVCODE, OVEXON	NM_001190482	PCSK5	Salzman2013
chr12_70671912_70713144_+	hsa_circ_0027545	41233	557	K562, Sknshra	NA	ANNOTATED, INTERNAL, ncRNA, OVCODE, OVEXON	NR_037615	CNOT2	Salzman2013
chr16_67070542_67116242_+	hsa_circ_0000707	45701	361	cd_19, Hs68_RNase, Hs68_control, K562, Helas3, Gm12878	None	ANNOTATED, CDS, coding, INTERNAL, OVCODE, OVEXON	NM_001755	CBFB	Jeck2013, Memczak2013, Salzman2013
chr8_59535779_59555632_-	hsa_circ_0005722	19854	498	Hs68_RNase, Hs68_control, Nhek, Gm12878, Sknshra	None	ANNOTATED, CDS, coding, INTERNAL, OVCODE, OVEXON	NM_003580	NSMAF	Jeck2013, Salzman2013
chr7_100417179_100417918_-	hsa_circ_0081534	740	489	Nhek, K562, Huvec, Hsmm, Hepg2, Helas3, Ag04450, A549, Nhlf, Sknshra, Mcf7	NA	ANNOTATED, CDS, coding, INTERNAL, OVCODE, OVEXON	NM_004444	EPHB4	Salzman2013
chr5_50045985_50059076_+	hsa_circ_0005809	13092	372	Hs68_RNase, Hs68_control, Sknshra	None	ANNOTATED, CDS, coding, INTERNAL, OVCODE, OVEXON	NM_001178055	PARP8	Jeck2013, Salzman2013
chr10_70723047_70726959_+	hsa_circ_0008523	3913	483	Hs68_RNase, Hs68_control, Nhek, K562, Gm12878, Ag04450, A549, Sknshra	None	ANNOTATED, CDS, coding, INTERNAL, OVCODE, OVEXON	NM_004728	DDX21	Jeck2013, Salzman2013
chr22_50810449_50832564_+	hsa_circ_0001258	22116	374	cd_19, cd_34, neutr, Hs68_RNase, Hs68_control, Nhek, K562, Huvec, Helas3, H1hesc, Gm12878, Bj, Ag04450, A549, Sknshra	None	ANNOTATED, CDS, coding, INTERNAL, OVCODE, OVEXON, UTR5	NM_001242899	PPP6R2	Jeck2013, Memczak2013, Salzman2013
chr1_225140372_225156576_+	hsa_circ_0016599	16205	800	K562, Helas3, H1hesc	NA	ANNOTATED, CDS, coding, INTERNAL, OVCODE, OVEXON, UTR5	NM_001373	DNAH14	Salzman2013
chr1_155896467_155896947_-	hsa_circ_0008339	481	217	Hs68_RNase, Hs68_control, K562, Huvec, Hepg2, Helas3, Gm12878, Bj, Ag04450, A549, Sknshra, Mcf7	None	ANNOTATED, CDS, coding, INTERNAL, OVCODE, OVEXON	NM_014949	KIAA0907	Jeck2013, Salzman2013
chr2_120634899_120640199_+	hsa_circ_0056236	5301	341	K562, H1hesc	NA	ANNOTATED, CDS, coding, INTERNAL, OVCODE, OVEXON	NM_002830	PTPN4	Salzman2013
chr8_124089351_124117704_+	hsa_circ_0085439	28354	1132	Ag04450	NA	ANNOTATED, CDS, coding, INTERNAL, OVCODE, OVEXON	NM_145647	WDR67	Salzman2013
chr14_99924616_99932150_-	hsa_circ_0000567	7535	683	HEK293, cd_19, cd_34, Hs68_RNase, Hs68_control, Nhek, K562, Huvec, Hepg2, Helas3, H1hesc, Gm12878, Bj, Ag04450, A549, Sknshra	None	ANNOTATED, CDS, coding, INTERNAL, OVCODE, OVEXON, UTR5	NM_199123	SETD3	Jeck2013, Memczak2013, Salzman2013
chr11_85685751_85695016_-	hsa_circ_0006629	9266	560	Hs68_RNase, Hs68_control, K562, Huvec, Hsmm, Hepg2, Helas3, H1hesc, Gm12878, Bj, Ag04450, A549, Nhek, Nhlf, Sknshra	None	ANNOTATED, CDS, coding, INTERNAL, OVCODE, OVEXON	NM_001008660	PICALM	Jeck2013, Salzman2013
chr6_138794443_138817508_-	hsa_circ_0006835	23066	281	Hs68_RNase, Hs68_control, Huvec, Hepg2, H1hesc, Gm12878, Bj, Ag04450, A549, Nhek	None	ANNOTATED, CDS, coding, INTERNAL, OVCODE, OVEXON	NM_020464	NHSL1	Jeck2013, Salzman2013
chr18_12999420_13019205_+	hsa_circ_0000831	19786	1054	HEK293, cd_19, Hs68_RNase, Hs68_control	None	ANNOTATED, CDS, coding, INTERNAL, OVCODE, OVEXON, UTR5	NM_032142	CEP192	Jeck2013, Memczak2013
chr2_27830712_27830906_+	hsa_circ_0008911	195	195	Hs68_RNase, Hs68_control, Nhek, K562, Helas3, Gm12878, Bj, Ag04450, A549, Sknshra	None	ANNOTATED, CDS, coding, INTERNAL, OVCODE, OVEXON	NM_032434	ZNF512	Jeck2013, Salzman2013
chr2_37516499_37518142_-	hsa_circ_0054126	1644	290	Hepg2, H1hesc	NA	ANNOTATED, CDS, coding, INTERNAL, OVCODE, OVEXON	NM_005813	PRKD3	Salzman2013
chr7_33014229_33020165_+	hsa_circ_0079792	5937	672	Hepg2	NA	ANNOTATED, CDS, coding, INTERNAL, OVCODE, OVEXON	NM_007270	FKBP9	Salzman2013
chr20_43600719_43615937_+	hsa_circ_0060521	15219	490	K562, Gm12878	NA	ANNOTATED, CDS, coding, INTERNAL, OVCODE, OVERLAPTX, OVEXON	NM_006282	STK4	Salzman2013
chr22_42204879_42209826_+	hsa_circ_0008806	4948	580	Hs68_RNase, Hs68_control, Nhek, K562, Huvec, Hepg2, Helas3, H1hesc, Gm12878, Bj, Ag04450, A549, Mcf7	None	ANNOTATED, CDS, coding, INTERNAL, OVCODE, OVEXON, UTR5	NM_024821	CCDC134	Jeck2013, Salzman2013
chr4_7795408_7811490_-	hsa_circ_0069137	16083	508	Huvec	NA	ANNOTATED, CDS, coding, INTERNAL, OVCODE, OVEXON	NM_001134647	AFAP1	Salzman2013
chr2_232995329_233001429_+	hsa_circ_0058698	6101	349	Helas3, H1hesc, Bj, Ag04450, A549, Sknshra, Mcf7	NA	ANNOTATED, CDS, coding, INTERNAL, OVCODE, OVEXON	NM_152383	DIS3L2	Salzman2013
chr10_70945743_70951522_+	hsa_circ_0006201	5780	582	Hs68_RNase, Hs68_control, K562, H1hesc, A549, Sknshra	None	ANNOTATED, CDS, coding, INTERNAL, OVCODE, OVEXON	NM_003171	SUPV3L1	Jeck2013, Salzman2013
chr3_186509514_186510736_-	hsa_circ_0068472	1223	391	K562, Hepg2, H1hesc, Gm12878	NA	ANNOTATED, CDS, coding, INTERNAL, OVCODE, OVEXON	NM_181573	RFC4	Salzman2013
chr3_197707197_197726213_+	hsa_circ_0068772	19017	683	A549	NA	ANNOTATED, CDS, coding, INTERNAL, OVCODE, OVERLAPTX, OVEXON	NM_001136049	LMLN	Salzman2013
chr10_101657843_101659823_-	hsa_circ_0019493	1981	366	H1hesc, Bj, Sknshra	NA	ANNOTATED, CDS, coding, INTERNAL, OVCODE, OVERLAPTX, OVEXON	NM_015221	DNMBP	Salzman2013
chr15_72810408_72853890_+	hsa_circ_0000629	43483	429	cd_34	None	ANNOTATED, CDS, coding, INTERNAL	NM_005744	ARIH1	Memczak2013
chr3_171944661_171969331_+	hsa_circ_0067985	24671	603	K562, Hepg2, Helas3, Gm12878, Ag04450	NA	ANNOTATED, CDS, coding, INTERNAL, OVCODE, OVERLAPTX, OVEXON	NM_022763	FNDC3B	Salzman2013
chr6_56564451_56569167_-	hsa_circ_0005891	4717	4717	Hs68_RNase, Hs68_control, Bj	None	INTERGENIC	None	None	Jeck2013, Salzman2013
chr1_175996708_176015460_-	hsa_circ_0015359	18753	452	Nhek, K562, Hepg2, Helas3, Gm12878, Bj, A549, Sknshra	NA	ANNOTATED, CDS, coding, INTERNAL, OVCODE, OVERLAPTX, OVEXON	NM_022457	RFWD2	Salzman2013
chr1_197552282_197614873_-	hsa_circ_0000168	62592	642	neutr, K562, Hepg2, Helas3, A549	None	ANNOTATED, CDS, coding, INTERNAL	NM_144977	DENND1B	Memczak2013, Salzman2013
chr1_21599192_21616649_-	hsa_circ_0002402	17458	442	Hs68_RNase, Hs68_control, Nhek, K562, Huvec, Hepg2, Helas3, H1hesc, Gm12878, Bj, Ag04450, A549, Sknshra	None	ANNOTATED, CDS, coding, INTERNAL, OVCODE, OVEXON	NM_001113348	ECE1	Jeck2013, Salzman2013
chr15_85607601_85626875_+	hsa_circ_0005053	19275	449	Hs68_RNase, Hs68_control, K562, Gm12878, Bj, Ag04450, A549, Sknshra	None	ANNOTATED, CDS, coding, INTERNAL, OVCODE, OVEXON	NM_002605	PDE8A	Jeck2013, Salzman2013
chr5_179136874_179147561_+	hsa_circ_0002051	10688	654	Hs68_RNase, Hs68_control, K562, Hepg2, Helas3, H1hesc, Gm12878, Bj, Ag04450, A549, Nhek, Sknshra, Mcf7	None	ANNOTATED, CDS, coding, INTERNAL, OVCODE, OVEXON	NM_001746	CANX	Jeck2013, Salzman2013
chr20_43139930_43142681_-	hsa_circ_0060491	2752	436	K562, Bj	NA	ANNOTATED, CDS, coding, INTERNAL, OVCODE, OVEXON	NM_006811	SERINC3	Salzman2013
chr10_126370176_126395456_-	hsa_circ_0002282	25281	1080	Hs68_RNase, Hs68_control, Nhek, K562, Hepg2, Helas3, H1hesc, Gm12878, Bj, Ag04450, Sknshra, Mcf7	None	ANNOTATED, CDS, coding, INTERNAL, OVCODE, OVEXON, UTR5	NM_014661	FAM53B	Jeck2013, Salzman2013
chr3_100002451_100009545_+	hsa_circ_0066639	7095	329	Nhek, K562, Helas3, Sknshra	NA	ANNOTATED, CDS, coding, INTERNAL, OVCODE, OVEXON	NM_001199198	TBC1D23	Salzman2013
chr15_68434284_68439038_+	hsa_circ_0008378	4755	359	Hs68_RNase, Hs68_control, Nhek, K562, Helas3, Gm12878, Bj, Ag04450, A549, Sknshra, Mcf7	None	ANNOTATED, CDS, coding, INTERNAL, OVCODE, OVEXON	NM_016166	PIAS1	Jeck2013, Salzman2013
chr21_34717552_34721849_+	hsa_circ_0061510	4298	470	Nhek, Bj	NA	ANNOTATED, CDS, coding, INTERNAL, OVCODE, OVEXON	NM_000629	IFNAR1	Salzman2013
chr17_80847544_80869665_+	hsa_circ_0046547	22122	505	K562, Hepg2, Helas3, H1hesc, Gm12878, A549, Sknshra, Mcf7	NA	ANNOTATED, CDS, coding, INTERNAL, OVCODE, OVEXON	NM_005993	TBCD	Salzman2013
chr3_57569625_57570191_-	hsa_circ_0005129	567	191	Hs68_RNase, Hs68_control	None	ANNOTATED, CDS, coding, INTERNAL, OVCODE, OVEXON	NM_001660	ARF4	Jeck2013
chr16_16146581_16150152_+	hsa_circ_0038111	3572	297	Nhek, K562, Huvec, Helas3, Gm12878, Bj, Ag04450, A549	NA	ANNOTATED, CDS, coding, INTERNAL, OVCODE, OVEXON	NM_004996	ABCC1	Salzman2013
chr14_37969113_37969343_+	hsa_circ_0031700	231	231	Ag04450	NA	ANNOTATED, CDS, coding, INTERNAL, OVCODE, OVEXON	NM_001195296	MIPOL1	Salzman2013
chr11_65269792_65272066_+	hsa_circ_0004287	2275	2275	Hs68_RNase, Hs68_control	None	ALT_ACCEPTOR, ALT_DONOR, INTERNAL, ncRNA, OVERLAPTX, OVEXON	NR_002819	MALAT1	Jeck2013
chr7_22330794_22357656_-	hsa_circ_0001681	26863	516	HEK293, cd_19	None	ANNOTATED, CDS, coding, INTERNAL, UTR5	NM_012294	RAPGEF5	Memczak2013
chr9_100756913_100760960_+	hsa_circ_0006609	4048	273	Hs68_RNase, Hs68_control	None	ANNOTATED, CDS, coding, INTERNAL, OVCODE, OVEXON	NM_006401	ANP32B	Jeck2013
chr3_149619859_149639014_+	hsa_circ_0005342	19156	291	Hs68_RNase, Hs68_control, Hepg2, Ag04450, A549, Sknshra	None	ANNOTATED, CDS, coding, INTERNAL, OVCODE, OVEXON	NM_007282	RNF13	Jeck2013, Salzman2013
chr6_170033043_170052104_-	hsa_circ_0003130	19062	821	Hs68_RNase, Hs68_control, K562, Huvec, Hsmm, Hepg2, Helas3, H1hesc, Bj, Ag04450, A549, Nhek, Sknshra	None	ANNOTATED, CDS, coding, INTERNAL, OVCODE, OVEXON	NM_182552	WDR27	Jeck2013, Salzman2013
chr6_150059779_150063706_-	hsa_circ_0078241	3928	317	K562, Huvec, Helas3, Gm12878, Bj, Ag04450, A549, Nhek, Sknshra	NA	ANNOTATED, CDS, coding, INTERNAL, OVCODE, OVEXON	NM_198887	NUP43	Salzman2013
chr3_111632166_111639266_+	hsa_circ_0001326	7101	666	cd_19, Hs68_RNase, Hs68_control, Nhek, Hepg2, Bj, Ag04450, Sknshra	None	ANNOTATED, CDS, coding, INTERNAL, OVCODE, OVEXON	NM_001134439	PHLDB2	Jeck2013, Memczak2013, Salzman2013
chr1_78183552_78184326_-	hsa_circ_0012992	775	227	Nhek, K562, Hepg2, H1hesc, Ag04450, A549, Sknshra	NA	ANNOTATED, CDS, coding, INTERNAL, OVCODE, OVERLAPTX, OVEXON	NM_015017	USP33	Salzman2013
chr2_157406120_157414094_+	hsa_circ_0005732	7975	504	Hs68_RNase, Hs68_control, K562, Hepg2, Helas3, Gm12878, Mcf7	None	ANNOTATED, CDS, coding, INTERNAL, OVCODE, OVEXON	NM_001083112	GPD2	Jeck2013, Salzman2013
chr4_39915231_39924368_-	hsa_circ_0006567	9138	465	Hs68_RNase, Hs68_control, K562, H1hesc, Bj, A549, Sknshra	None	ANNOTATED, CDS, coding, INTERNAL, OVCODE, OVEXON	NM_001100399	PDS5A	Jeck2013, Salzman2013
chr6_38050168_38084515_+	hsa_circ_0076251	34348	234	K562, Hepg2, Helas3, H1hesc, Bj, Ag04450, A549, Nhek, Sknshra	NA	ANNOTATED, CDS, coding, INTERNAL, OVCODE, OVERLAPTX, OVEXON	NM_021943	ZFAND3	Salzman2013
chr17_8141349_8141947_-	hsa_circ_0008041	599	450	Hs68_RNase, Hs68_control, Nhek, K562, Hepg2, Helas3, H1hesc, Gm12878, Bj, Ag04450, A549, Sknshra, Mcf7	None	ANNOTATED, CDS, coding, INTERNAL, OVCODE, OVEXON	NM_025099	CTC1	Jeck2013, Salzman2013
chr5_65284463_65310553_+	hsa_circ_0001493	26091	590	cd_19, Hs68_RNase, Hs68_control, K562, Huvec, Helas3, Gm12878, Ag04450	None	ANNOTATED, CDS, coding, INTERNAL, OVCODE, OVEXON, UTR5	NM_001253697	ERBB2IP	Jeck2013, Memczak2013, Salzman2013
chrX_100356047_100357400_+	hsa_circ_0091237	1354	377	Gm12878, Ag04450	NA	ANNOTATED, CDS, coding, INTERNAL, OVCODE, OVEXON, UTR5	NM_006733	CENPI	Salzman2013
chr12_111923069_111924628_-	hsa_circ_0005756	1560	284	Hs68_RNase, Hs68_control	None	ALT_DONOR, CDS, coding, INTERNAL, intronic, OVCODE, OVEXON	NM_002973	ATXN2	Jeck2013
chr17_2075952_2076153_-	hsa_circ_0041382	202	202	Nhek, K562, Hepg2, Helas3, H1hesc, Bj, Sknshra	NA	ANNOTATED, CDS, coding, INTERNAL, OVCODE, OVEXON	NM_001170957	SMG6	Salzman2013
chr3_136117591_136141886_-	hsa_circ_0067474	24296	627	K562, Huvec, Helas3, Gm12878, Ag04450	NA	ANNOTATED, CDS, coding, INTERNAL, OVCODE, OVERLAPTX, OVEXON	NM_005862	STAG1	Salzman2013
chr7_99090663_99092254_-	hsa_circ_0001726	1592	1592	cd_19, cd_34, Hs68_RNase, Hs68_control	None	ALT_DONOR, CDS, coding, downstream_end, OVCODE, OVEXON, UTR3	NM_032164	ZNF394	Jeck2013, Memczak2013
chr17_722679_729318_-	hsa_circ_0004931	6640	460	Hs68_RNase, Hs68_control, Nhek, Hepg2, Helas3, H1hesc, Bj, Ag04450, A549	None	ANNOTATED, CDS, coding, INTERNAL, OVCODE, OVEXON	NM_022463	NXN	Jeck2013, Salzman2013
chr7_1937836_1976533_-	hsa_circ_0079136	38698	402	A549	NA	ANNOTATED, CDS, coding, INTERNAL, OVCODE, OVEXON	NM_003550	MAD1L1	Salzman2013
chr4_25128886_25160729_-	hsa_circ_0069335	31844	1006	K562, Bj	NA	ANNOTATED, CDS, coding, INTERNAL, OVCODE, OVEXON	NM_016955	SEPSECS	Salzman2013
chr7_35707044_35712888_-	hsa_circ_0001696	5845	347	cd_19, Nhek, K562, Hepg2, Helas3, H1hesc, Gm12878, Bj, Ag04450, A549, Sknshra, Mcf7	None	ANNOTATED, CDS, coding, INTERNAL	NM_022373	HERPUD2	Memczak2013, Salzman2013
chr13_114164553_114175048_+	hsa_circ_0008539	10496	305	Hs68_RNase, Hs68_control, Nhek, K562, Hepg2, Helas3, H1hesc, Gm12878, Bj, Ag04450, A549	None	ANNOTATED, CDS, coding, INTERNAL, OVCODE, OVEXON	NM_017905	TMCO3	Jeck2013, Salzman2013
chr12_112757029_112757546_-	hsa_circ_0002584	518	518	Hs68_RNase, Hs68_control	None	ANNOTATED, CDS, coding, INTERNAL, OVCODE, OVEXON, UTR5	NM_001109662	C12orf51	Jeck2013
chr2_61420036_61430398_-	hsa_circ_0008855	10363	204	Hs68_RNase, Hs68_control	None	ANNOTATED, CDS, coding, INTERNAL, OVCODE, OVEXON	NM_014709	USP34	Jeck2013
chr5_74109665_74137504_-	hsa_circ_0007158	27840	673	Hs68_RNase, Hs68_control, Hepg2, Helas3, H1hesc, Gm12878, A549, Nhek	None	ANNOTATED, CDS, coding, INTERNAL, OVCODE, OVEXON, UTR5	NM_015566	FAM169A	Jeck2013, Salzman2013
chr2_231940225_231951895_+	hsa_circ_0001110	11671	1002	cd_19, Hs68_RNase, Hs68_control, Nhek, K562, Huvec, Helas3, H1hesc, Gm12878, Bj, Ag04450, A549, Sknshra	None	ANNOTATED, CDS, coding, INTERNAL, OVCODE, OVEXON	NM_001191037	PSMD1	Jeck2013, Memczak2013, Salzman2013
chr12_46339032_46345510_-	hsa_circ_0025971	6479	244	K562, Ag04450	NA	ANNOTATED, CDS, coding, INTERNAL, OVCODE, OVEXON	NM_004719	SCAF11	Salzman2013
chr7_111926928_111927129_+	hsa_circ_0001739	202	202	cd_34, Hs68_RNase, Hs68_control, Nhek, K562, Huvec, Hepg2, Helas3, H1hesc, Gm12878, Bj, Ag04450, A549, Sknshra	None	ANNOTATED, CDS, coding, INTERNAL, OVCODE, OVEXON	NM_021994	ZNF277	Jeck2013, Memczak2013, Salzman2013
chr12_11992074_12006495_+	hsa_circ_0005501	14422	300	Hs68_RNase, Hs68_control	None	ANNOTATED, CDS, coding, INTERNAL, OVCODE, OVEXON	NM_001987	ETV6	Jeck2013
chr9_136671203_136677338_-	hsa_circ_0089392	6136	387	Hepg2, Helas3, H1hesc, Gm12878, Bj, Nhek, Sknshra, Mcf7	NA	ANNOTATED, CDS, coding, INTERNAL, OVCODE, OVEXON	NM_001134398	VAV2	Salzman2013
chr17_64492319_64510584_+	hsa_circ_0007081	18266	18266	Hs68_RNase, Hs68_control	LTR	ALT_DONOR, CDS, coding, INTERNAL, intronic, OVCODE, OVEXON	NM_002737	PRKCA	Jeck2013
chr9_22046750_22064017_+	hsa_circ_0005118	17268	1254	Hs68_RNase, Hs68_control, Bj	None	ANNOTATED, INTERNAL, ncRNA, OVEXON	NR_003529	CDKN2B-AS	Jeck2013, Salzman2013
chr4_22403054_22404422_-	hsa_circ_0002785	1369	249	Hs68_RNase, Hs68_control, Huvec, Hepg2, Helas3, H1hesc, Gm12878, Bj, Ag04450, A549, Nhek, Sknshra, Mcf7	None	ANNOTATED, CDS, coding, INTERNAL, OVCODE, OVEXON	NM_145290	GPR125	Jeck2013, Salzman2013
chr14_35044962_35078948_-	hsa_circ_0031607	33987	867	K562, Sknshra	NA	ANNOTATED, CDS, coding, INTERNAL, OVCODE, OVEXON, UTR5	NM_021249	SNX6	Salzman2013
chr7_45791128_45798773_-	hsa_circ_0004835	7646	438	Hs68_RNase, Hs68_control	None	ANNOTATED, INTERNAL, ncRNA, OVEXON	TCONS_l2_00026539	TCONS_l2_00026539	Jeck2013
chr13_99549742_99556960_-	hsa_circ_0030716	7219	749	K562	NA	ANNOTATED, CDS, coding, INTERNAL, OVCODE, OVEXON	NM_001130048	DOCK9	Salzman2013
chr5_80911292_80946158_-	hsa_circ_0073222	34867	220	K562, Ag04450, Nhek, Sknshra	NA	ANNOTATED, CDS, coding, INTERNAL, OVCODE, OVEXON	NM_012446	SSBP2	Salzman2013
chr5_64863340_64868113_+	hsa_circ_0072697	4774	773	K562, Gm12878, Ag04450, A549	NA	ANNOTATED, CDS, coding, INTERNAL, OVCODE, OVEXON	NM_015342	PPWD1	Salzman2013
chr5_176370336_176385155_-	hsa_circ_0001558	14820	397	HEK293, cd_19, neutr, Hs68_RNase, Hs68_control, K562, Huvec, Hepg2, Helas3, H1hesc, Gm12878, Bj, Ag04450, A549, Nhek, Sknshra, Mcf7	None	ANNOTATED, CDS, coding, INTERNAL, OVCODE, OVEXON	NM_016290	UIMC1	Jeck2013, Memczak2013, Salzman2013
chr2_228384664_228389631_+	hsa_circ_0058520	4968	433	Helas3, Ag04450, Mcf7	NA	ANNOTATED, CDS, coding, INTERNAL, OVCODE, OVEXON	NM_001135187	AGFG1	Salzman2013
chr20_58755108_58755971_+	hsa_circ_0001174	864	864	neutr	None	ALT_ACCEPTOR, intronic, ncRNA	TCONS_l2_00016814	TCONS_l2_00016814	Memczak2013
chr12_108136974_108140201_-	hsa_circ_0007468	3228	355	Hs68_RNase, Hs68_control, Nhek, K562, Huvec, Gm12878, Ag04450, A549	None	ANNOTATED, CDS, coding, INTERNAL, OVCODE, OVEXON	NM_012406	PRDM4	Jeck2013, Salzman2013
chr10_79741912_79744056_-	hsa_circ_0007310	2145	517	Hs68_RNase, Hs68_control	None	ANNOTATED, CDS, coding, INTERNAL, OVCODE, OVEXON	NM_007055	POLR3A	Jeck2013
chr3_52964345_52966324_-	hsa_circ_0005469	1980	444	Hs68_RNase, Hs68_control, Nhek, Helas3	None	ANNOTATED, CDS, coding, INTERNAL, OVCODE, OVEXON	NM_001005159	SFMBT1	Jeck2013, Salzman2013
chr12_58340778_58347472_+	hsa_circ_0000412	6695	304	cd_19, neutr, Hs68_RNase, Hs68_control	None	ANNOTATED, CDS, coding, INTERNAL, OVCODE, OVEXON	NM_033276	XRCC6BP1	Jeck2013, Memczak2013
chr1_233313548_233344435_-	hsa_circ_0001958	30888	582	Hs68_RNase, Hs68_control, H1hesc, Gm12878, Ag04450, A549, Mcf7	None	ANNOTATED, CDS, coding, INTERNAL, OVCODE, OVEXON	NM_014801	PCNXL2	Jeck2013, Salzman2013
chr3_196778448_196796131_-	hsa_circ_0068680	17684	606	Nhek	NA	ANNOTATED, CDS, coding, INTERNAL, OVCODE, OVEXON	NM_001204387	DLG1	Salzman2013
chr20_32207323_32211102_+	hsa_circ_0003426	3780	272	Hs68_RNase, Hs68_control, Nhek, K562, Huvec, Hsmm, Hepg2, Helas3, H1hesc, Gm12878, Bj, Ag04450, A549, Sknshra, Mcf7	None	ANNOTATED, CDS, coding, INTERNAL, OVCODE, OVEXON	NM_005093	CBFA2T2	Jeck2013, Salzman2013
chr5_14405957_14420130_+	hsa_circ_0008697	14174	487	Hs68_RNase, Hs68_control, Huvec, Hsmm, Hepg2, Helas3, Bj, Ag04450, Sknshra	None	ANNOTATED, CDS, coding, INTERNAL, OVCODE, OVEXON	NM_007118	TRIO	Jeck2013, Salzman2013
chr12_50055749_50062337_-	hsa_circ_0026174	6589	326	Ag04450	NA	ANNOTATED, CDS, coding, INTERNAL, OVCODE, OVEXON	NM_175736	FMNL3	Salzman2013
chr12_123651202_123665757_-	hsa_circ_0029184	14556	350	Nhek, K562, Helas3, H1hesc, Gm12878, Bj, Sknshra	NA	ANNOTATED, CDS, coding, INTERNAL, OVCODE, OVEXON	NM_022782	MPHOSPH9	Salzman2013
chr2_120885264_120903865_+	hsa_circ_0056280	18602	456	K562, Gm12878, Ag04450, Sknshra	NA	ANNOTATED, CDS, coding, INTERNAL, OVCODE, OVEXON	NM_020909	EPB41L5	Salzman2013
chr5_72157635_72171564_+	hsa_circ_0072918	13930	446	H1hesc, Gm12878	NA	ANNOTATED, CDS, coding, INTERNAL, OVCODE, OVEXON	NM_002270	TNPO1	Salzman2013
chr15_75809600_75819602_-	hsa_circ_0007595	10003	465	Hs68_RNase, Hs68_control, Nhek, K562, Huvec, Helas3, H1hesc, Gm12878, Ag04450	None	ANNOTATED, CDS, coding, INTERNAL, OVCODE, OVEXON	NM_002833	PTPN9	Jeck2013, Salzman2013
chr2_64083440_64085070_+	hsa_circ_0001020	1631	236	cd_19, neutr, Hs68_RNase, Hs68_control, K562, H1hesc, Gm12878, A549	None	ANNOTATED, CDS, coding, INTERNAL, OVCODE, OVEXON	NM_006759	UGP2	Jeck2013, Memczak2013, Salzman2013
chr8_95676925_95677424_+	hsa_circ_0084927	500	287	Nhek, H1hesc, Mcf7	NA	ANNOTATED, CDS, coding, INTERNAL, OVCODE, OVEXON	NM_017697	ESRP1	Salzman2013
chr7_140055468_140069482_-	hsa_circ_0082708	14015	420	Nhek, K562, Huvec, H1hesc, Ag04450, A549, Sknshra	NA	ANNOTATED, CDS, coding, INTERNAL, OVCODE, OVEXON	NM_207113	SLC37A3	Salzman2013
chr7_47451325_47454804_-	hsa_circ_0080168	3480	250	Bj, A549, Sknshra	NA	ANNOTATED, CDS, coding, INTERNAL, OVCODE, OVEXON	NM_022748	TNS3	Salzman2013
chr11_17190224_17191353_-	hsa_circ_0003577	1130	1130	Hs68_RNase, Hs68_control	None	ALT_ACCEPTOR, CDS, coding, INTERNAL, OVCODE, OVEXON, UTR5	NM_002645	PIK3C2A	Jeck2013
chr9_20923659_20933131_+	hsa_circ_0005646	9473	584	Hs68_RNase, Hs68_control	None	ALT_DONOR, CDS, coding, INTERNAL, intronic, OVCODE, OVEXON	NM_017794	KIAA1797	Jeck2013
chr2_191774989_191778090_+	hsa_circ_0002428	3102	3102	Hs68_RNase, Hs68_control	None	ALT_DONOR, CDS, coding, INTERNAL, intronic, OVCODE, OVEXON	NM_014905	GLS	Jeck2013
chr6_2116005_2124965_-	hsa_circ_0075451	8961	243	K562, Hepg2, Helas3, Gm12878, A549, Nhek, Sknshra	NA	ANNOTATED, CDS, coding, INTERNAL, OVCODE, OVEXON	NM_001500	GMDS	Salzman2013
chr2_99811214_99812219_+	hsa_circ_0008609	1006	405	Hs68_RNase, Hs68_control, Nhek, Gm12878, Bj	None	ANNOTATED, INTERNAL, ncRNA, OVCODE, OVEXON	NR_028356	MRPL30	Jeck2013, Salzman2013
chr19_58755331_58758160_+	hsa_circ_0000967	2830	303	cd_34	None	ANNOTATED, CDS, coding, INTERNAL, UTR5	NM_014480	ZNF544	Memczak2013
chr9_88233898_88248289_-	hsa_circ_0001868	14392	1033	HEK293, cd_19, neutr, Hs68_RNase, Hs68_control, Helas3, H1hesc, Gm12878, Ag04450, Sknshra	None	ANNOTATED, CDS, coding, INTERNAL, OVCODE, OVEXON	NM_015239	AGTPBP1	Jeck2013, Memczak2013, Salzman2013
chr1_151288049_151288985_-	hsa_circ_0006892	937	937	Hs68_RNase, Hs68_control, Nhek, K562, Huvec, Hepg2, Helas3, H1hesc, Gm12878, Bj, Ag04450, A549, Sknshra, Mcf7	None	ANNOTATED, CDS, coding, INTERNAL, OVCODE, OVEXON, UTR5	NM_001198773	PI4KB	Jeck2013, Salzman2013
chr17_66446869_66449133_-	hsa_circ_0003142	2265	253	Hs68_RNase, Hs68_control	None	ANNOTATED, CDS, coding, INTERNAL, OVCODE, OVEXON	NM_017983	WIPI1	Jeck2013
chr9_94058303_94118437_-	hsa_circ_0003518	60135	393	Hs68_RNase, Hs68_control	None	ANNOTATED, CDS, coding, INTERNAL, OVCODE, OVEXON	NM_001698	AUH	Jeck2013
chr3_111632166_111632549_+	hsa_circ_0066783	384	384	Nhek, Bj, Ag04450, A549, Sknshra	NA	ANNOTATED, CDS, coding, INTERNAL, OVCODE, OVEXON	NM_001134438	PHLDB2	Salzman2013
chr20_62895782_62899363_+	hsa_circ_0061232	3582	399	K562	NA	ANNOTATED, CDS, coding, INTERNAL, OVCODE, OVEXON	NM_018257	PCMTD2	Salzman2013
chr11_44146339_44151688_+	hsa_circ_0021801	5350	430	H1hesc	NA	ANNOTATED, CDS, coding, INTERNAL, OVCODE, OVEXON	NM_001178083	EXT2	Salzman2013
chr1_51001041_51032903_-	hsa_circ_0012395	31863	381	K562	NA	ANNOTATED, CDS, coding, INTERNAL, OVCODE, OVERLAPTX, OVEXON	NM_007051	FAF1	Salzman2013
chr8_38282027_38283763_-	hsa_circ_0005564	1737	315	Hs68_RNase, Hs68_control, Hsmm, Helas3, H1hesc, Gm12878, Bj, Ag04450, A549, Nhlf, Sknshra	None	ANNOTATED, CDS, coding, INTERNAL, OVCODE, OVEXON	NM_001174064	FGFR1	Jeck2013, Salzman2013
chr5_60768508_60790237_+	hsa_circ_0006381	21730	657	Hs68_RNase, Hs68_control	None	ANNOTATED, CDS, coding, INTERNAL, OVCODE, OVEXON	NM_020928	ZSWIM6	Jeck2013
chr5_176707566_176715926_+	hsa_circ_0075172	8361	636	Bj, Nhek	NA	ANNOTATED, CDS, coding, INTERNAL, OVCODE, OVEXON	NM_022455	NSD1	Salzman2013
chr3_56661065_56662642_-	hsa_circ_0001314	1578	392	cd_19, neutr	None	ANNOTATED, CDS, coding, INTERNAL	NM_015224	FAM208A	Memczak2013
chr9_33318729_33319125_+	hsa_circ_0086648	397	318	K562, Hepg2, Helas3, H1hesc, Ag04450, A549, Sknshra	NA	ANNOTATED, CDS, coding, INTERNAL, OVCODE, OVEXON	NM_002504	NFX1	Salzman2013
chr1_113153463_113159517_-	hsa_circ_0003277	6055	246	Hs68_RNase, Hs68_control	None	ANNOTATED, CDS, coding, INTERNAL, OVCODE, OVEXON	NM_017744	ST7L	Jeck2013
chr6_147527107_147560406_+	hsa_circ_0078150	33300	281	K562, Hepg2, Helas3, H1hesc, Gm12878, Ag04450, A549	NA	ANNOTATED, CDS, coding, INTERNAL, OVCODE, OVEXON	NM_001127715	STXBP5	Salzman2013
chr17_30310018_30315516_+	hsa_circ_0002629	5499	284	Hs68_RNase, Hs68_control, Nhek, K562, Huvec, H1hesc, Gm12878, Ag04450, A549	None	ANNOTATED, CDS, coding, INTERNAL, OVCODE, OVEXON	NM_015355	SUZ12	Jeck2013, Salzman2013
chr12_122218778_122219098_-	hsa_circ_0000450	321	245	cd_19	None	ANNOTATED, CDS, coding, INTERNAL	NM_019034	RHOF	Memczak2013
chr1_212502477_212506940_+	hsa_circ_0002321	4464	299	Hs68_RNase, Hs68_control, K562, Hepg2, H1hesc, Ag04450, A549	None	ANNOTATED, CDS, coding, INTERNAL, OVCODE, OVEXON	NM_006243	PPP2R5A	Jeck2013, Salzman2013
chr10_69751956_69773943_-	hsa_circ_0005190	21988	363	Hs68_RNase, Hs68_control, H1hesc, Bj	None	ANNOTATED, CDS, coding, INTERNAL, OVCODE, OVEXON	NM_022079	HERC4	Jeck2013, Salzman2013
chr16_69687139_69687331_+	hsa_circ_0040075	193	193	H1hesc, Gm12878	NA	ANNOTATED, CDS, coding, INTERNAL, OVCODE, OVEXON	NM_138714	NFAT5	Salzman2013
chr2_3425652_3428434_+	hsa_circ_0052471	2783	253	K562, Hepg2	NA	ANNOTATED, CDS, coding, INTERNAL, OVCODE, OVEXON	NM_016030	TTC15	Salzman2013
chr20_3274785_3275275_-	hsa_circ_0002619	491	220	Hs68_RNase, Hs68_control, Nhek, K562, Huvec, Hsmm, Hepg2, Helas3, Bj, Ag04450, A549, Sknshra	None	ANNOTATED, CDS, coding, INTERNAL, OVCODE, OVEXON	NM_001009984	C20orf194	Jeck2013, Salzman2013
chr3_149563798_149589941_+	hsa_circ_0067716	26144	337	Nhek, K562, Hepg2, Helas3, H1hesc, Gm12878, Bj, Ag04450, A549, Sknshra, Mcf7	NA	ANNOTATED, CDS, coding, INTERNAL, OVCODE, OVERLAPTX, OVEXON, UTR5	NM_007282	RNF13	Salzman2013
chr4_151719233_151738409_-	hsa_circ_0008618	19177	409	Hs68_RNase, Hs68_control, K562, Huvec, Hepg2, Helas3, H1hesc, Gm12878, Ag04450, A549, Nhek, Sknshra, Mcf7	None	ANNOTATED, CDS, coding, INTERNAL, OVCODE, OVEXON	NM_001199282	LRBA	Jeck2013, Salzman2013
chr14_31841016_31844174_-	hsa_circ_0031569	3159	253	K562, Huvec, Hepg2, Helas3, Gm12878, Bj, Ag04450, Sknshra	NA	ANNOTATED, CDS, coding, INTERNAL, OVCODE, OVEXON	NM_015473	HEATR5A	Salzman2013
chr17_60061532_60062451_-	hsa_circ_0002220	920	503	Hs68_RNase, Hs68_control	None	ANNOTATED, CDS, coding, INTERNAL, OVCODE, OVEXON	NM_005121	MED13	Jeck2013
chr1_10500404_10502498_+	hsa_circ_0006905	2095	244	Hs68_RNase, Hs68_control	None	ALT_DONOR, INTERNAL, ncRNA, OVCODE, OVEXON	NR_036462	APITD1	Jeck2013
chr19_12783661_12784130_+	hsa_circ_0049540	470	292	K562, Hepg2, Helas3, Gm12878, Bj, A549	NA	ANNOTATED, CDS, coding, INTERNAL, OVCODE, OVERLAPTX, OVEXON	NM_001099737	WDR83	Salzman2013
chr2_9490937_9499018_+	hsa_circ_0006089	8082	438	Hs68_RNase, Hs68_control, Nhek, Huvec, Hsmm, Helas3, H1hesc, Bj, Ag04450, A549, Nhlf, Sknshra, Mcf7	None	ANNOTATED, CDS, coding, INTERNAL, OVCODE, OVEXON	NM_003887	ASAP2	Jeck2013, Salzman2013
chr16_18830824_18839490_-	hsa_circ_0038244	8667	291	K562, Helas3, Gm12878, Ag04450, A549, Sknshra	NA	ANNOTATED, CDS, coding, INTERNAL, OVCODE, OVEXON	NM_015092	SMG1	Salzman2013
chr11_36103203_36120011_+	hsa_circ_0004453	16809	261	Hs68_RNase, Hs68_control, K562, Hsmm, Hepg2, Helas3, H1hesc, Bj, Ag04450, A549, Nhek, Sknshra	None	ANNOTATED, CDS, coding, INTERNAL, OVCODE, OVEXON	NM_174902	LDLRAD3	Jeck2013, Salzman2013
chr18_2666156_2674144_+	hsa_circ_0006235	7989	452	Hs68_RNase, Hs68_control	None	ANNOTATED, CDS, coding, INTERNAL, OVCODE, OVEXON	NM_015295	SMCHD1	Jeck2013
chr13_42352121_42393522_-	hsa_circ_0030105	41402	649	Nhek, Huvec, Gm12878, Ag04450, Sknshra	NA	ANNOTATED, CDS, coding, INTERNAL, OVCODE, OVERLAPTX, OVEXON	NM_015058	KIAA0564	Salzman2013
chr17_49118862_49133843_-	hsa_circ_0002605	14982	317	Hs68_RNase, Hs68_control, H1hesc, A549	None	ANNOTATED, CDS, coding, INTERNAL, OVCODE, OVEXON	NM_001130528	SPAG9	Jeck2013, Salzman2013
chr6_155108995_155116273_+	hsa_circ_0007981	7279	447	Hs68_RNase, Hs68_control, K562, Huvec, Hepg2, Helas3, H1hesc, Gm12878, Bj, Ag04450, A549, Nhek, Sknshra	None	ANNOTATED, CDS, coding, INTERNAL, OVCODE, OVEXON	NM_014892	SCAF8	Jeck2013, Salzman2013
chr9_20819795_20823114_+	hsa_circ_0003295	3320	465	Hs68_RNase, Hs68_control	None	ANNOTATED, CDS, coding, INTERNAL, OVCODE, OVEXON	NM_017794	KIAA1797	Jeck2013
chr9_88200378_88211364_-	hsa_circ_0087385	10987	830	Hepg2, Helas3, H1hesc, A549, Nhek	NA	ANNOTATED, CDS, coding, INTERNAL, OVCODE, OVEXON	NM_015239	AGTPBP1	Salzman2013
chr2_15629018_15651474_-	hsa_circ_0000978	22457	337	cd_19, Hs68_RNase, Hs68_control, Nhek, K562, H1hesc, Ag04450, A549, Sknshra	None	ANNOTATED, CDS, coding, INTERNAL, OVCODE, OVEXON	NM_015909	NBAS	Jeck2013, Memczak2013, Salzman2013
chr18_47563220_47566684_-	hsa_circ_0047678	3465	317	Helas3, Gm12878	NA	ANNOTATED, CDS, coding, INTERNAL, OVCODE, OVEXON	NM_001080467	MYO5B	Salzman2013
chr1_26584088_26586293_+	hsa_circ_0000033	2206	438	cd_19, Hs68_RNase, Hs68_control, Nhek, K562, Helas3, H1hesc, Gm12878, Ag04450, A549, Sknshra	None	ANNOTATED, CDS, coding, INTERNAL, OVCODE, OVEXON	NM_022778	CEP85	Jeck2013, Memczak2013, Salzman2013
chr1_151611364_151641111_+	hsa_circ_0000131	29748	838	cd_34, neutr, Hs68_RNase, Hs68_control, Nhek, K562, Hepg2, Helas3, H1hesc, Gm12878, Ag04450, A549, Sknshra	None	ANNOTATED, CDS, coding, INTERNAL, OVCODE, OVEXON	NM_030918	SNX27	Jeck2013, Memczak2013, Salzman2013
chr5_179675973_179707608_-	hsa_circ_0075346	31636	663	K562, Hepg2, Helas3, H1hesc, Gm12878, Bj, Ag04450, A549, Nhek, Mcf7	NA	ANNOTATED, CDS, coding, INTERNAL, OVCODE, OVEXON, UTR5	NM_139069	MAPK9	Salzman2013
chr19_18285850_18286507_+	hsa_circ_0005571	658	351	Hs68_RNase, Hs68_control, K562, Hepg2, Helas3, H1hesc, Gm12878	None	ANNOTATED, CDS, coding, INTERNAL, OVCODE, OVEXON	NM_006332	IFI30	Jeck2013, Salzman2013
chr3_136162129_136196254_-	hsa_circ_0067479	34126	644	K562	NA	ANNOTATED, CDS, coding, INTERNAL, OVCODE, OVERLAPTX, OVEXON	NM_005862	STAG1	Salzman2013
chr5_72354260_72373320_+	hsa_circ_0003571	19061	594	Hs68_RNase, Hs68_control, Huvec, Hepg2, H1hesc, A549	None	ANNOTATED, CDS, coding, INTERNAL, OVCODE, OVEXON	NM_138782	FCHO2	Jeck2013, Salzman2013
chr5_167995651_167996003_-	hsa_circ_0006894	353	353	Hs68_RNase, Hs68_control	None	ANNOTATED, CDS, coding, INTERNAL, OVCODE, OVEXON	NM_024594	PANK3	Jeck2013
chr19_1271328_1272050_+	hsa_circ_0007715	723	292	Hs68_RNase, Hs68_control	None	ANNOTATED, CDS, coding, INTERNAL, OVCODE, OVEXON	NM_001280	CIRBP	Jeck2013
chr12_22643057_22659753_-	hsa_circ_0008769	16697	320	Hs68_RNase, Hs68_control, Bj, A549	None	ANNOTATED, CDS, coding, INTERNAL, OVCODE, OVEXON	NM_014802	KIAA0528	Jeck2013, Salzman2013
chr12_50488220_50490755_+	hsa_circ_0006535	2536	259	Hs68_RNase, Hs68_control, Nhek, K562, Hepg2, Helas3, H1hesc, Gm12878, Ag04450, A549	None	ANNOTATED, CDS, coding, INTERNAL, OVCODE, OVEXON	NM_003076	SMARCD1	Jeck2013, Salzman2013
chr2_242265408_242275513_+	hsa_circ_0005154	10106	332	Hs68_RNase, Hs68_control, K562, Huvec, Gm12878, Bj, Ag04450	None	ANNOTATED, CDS, coding, INTERNAL, OVCODE, OVEXON	NM_001008491	SEPT2	Jeck2013, Salzman2013
chr3_137940768_137947852_+	hsa_circ_0005404	7085	406	Hs68_RNase, Hs68_control, K562	None	ANNOTATED, CDS, coding, INTERNAL, OVCODE, OVEXON	NM_015396	ARMC8	Jeck2013, Salzman2013
chr17_66440634_66449133_-	hsa_circ_0004716	8500	350	Hs68_RNase, Hs68_control	None	ANNOTATED, CDS, coding, INTERNAL, OVCODE, OVEXON	NM_017983	WIPI1	Jeck2013
chr6_137015278_137018525_-	hsa_circ_0006554	3248	447	Hs68_RNase, Hs68_control, Gm12878, Ag04450, Sknshra	None	ANNOTATED, CDS, coding, INTERNAL, OVCODE, OVEXON	NM_005923	MAP3K5	Jeck2013, Salzman2013
chr2_136467003_136467801_+	hsa_circ_0056586	799	277	Nhek, K562, Huvec, Hepg2, Helas3, H1hesc, Gm12878, Ag04450, A549, Sknshra	NA	ANNOTATED, CDS, coding, INTERNAL, OVCODE, OVEXON	NM_015361	R3HDM1	Salzman2013
chr4_39301641_39304771_-	hsa_circ_0008596	3131	698	Hs68_RNase, Hs68_control, Gm12878, Bj, Ag04450	None	ANNOTATED, CDS, coding, INTERNAL, OVCODE, OVEXON	NM_001204747	RFC1	Jeck2013, Salzman2013
chr15_65110145_65111422_-	hsa_circ_0002205	1278	341	Hs68_RNase, Hs68_control, K562, Huvec, Hepg2, Helas3, H1hesc, Gm12878, Bj, Ag04450, A549	None	ANNOTATED, CDS, coding, INTERNAL, OVCODE, OVEXON	NM_025049	PIF1	Jeck2013, Salzman2013
chr18_46190123_46197115_+	hsa_circ_0008545	6993	255	Hs68_RNase, Hs68_control, Nhek, Hsmm, Hepg2, Helas3, H1hesc, Gm12878, Bj, Ag04450, A549, Nhlf, Sknshra, Mcf7	None	ANNOTATED, CDS, coding, INTERNAL, OVCODE, OVEXON	NM_001142397	CTIF	Jeck2013, Salzman2013
chr1_25666965_25678184_+	hsa_circ_0007054	11220	287	Hs68_RNase, Hs68_control, K562, Helas3, H1hesc, A549, Mcf7	None	ANNOTATED, CDS, coding, INTERNAL, OVCODE, OVEXON, UTR5	NM_014313	TMEM50A	Jeck2013, Salzman2013
chr4_77051809_77057565_-	hsa_circ_0008128	5757	761	Hs68_RNase, Hs68_control, K562, H1hesc, Gm12878, Ag04450	None	ANNOTATED, CDS, coding, INTERNAL, OVCODE, OVEXON	NM_017426	NUP54	Jeck2013, Salzman2013
chr9_99711837_99735230_-	hsa_circ_0005306	23394	287	Hs68_RNase, Hs68_control, K562, Hepg2, H1hesc, Gm12878, Bj, Ag04450, A549, Nhek	None	ANNOTATED, INTERNAL, ncRNA, OVEXON	NR_002894	HIATL2	Jeck2013, Salzman2013
chr14_71970329_71996087_+	hsa_circ_0006671	25759	25759	Hs68_RNase, Hs68_control	None	ALT_ACCEPTOR, coding, OVEXON, upstream_start, UTR5	NM_015556	SIPA1L1	Jeck2013
chr8_68018140_68028357_+	hsa_circ_0001806	10218	432	HEK293, cd_19, Hs68_RNase, Hs68_control, K562, Huvec, Hepg2, H1hesc, Gm12878, Bj, Ag04450, A549, Sknshra, Mcf7	None	ANNOTATED, CDS, coding, INTERNAL, OVCODE, OVEXON	NM_024790	CSPP1	Jeck2013, Memczak2013, Salzman2013
chr5_37238959_37243221_-	hsa_circ_0001474	4263	368	cd_34	None	ANNOTATED, CDS, coding, INTERNAL	NM_023073	C5orf42	Memczak2013
chr3_23996028_23996294_+	hsa_circ_0064575	267	267	Helas3, Bj, A549	NA	ANNOTATED, CDS, coding, INTERNAL, OVCODE, OVEXON	NM_005126	NR1D2	Salzman2013
chr12_57064059_57066849_-	hsa_circ_0027093	2791	373	K562, Helas3, Gm12878, Bj, A549, Sknshra	NA	ANNOTATED, CDS, coding, INTERNAL, OVCODE, OVEXON	NM_006601	PTGES3	Salzman2013
chr2_20454624_20455931_-	hsa_circ_0005952	1308	386	Hs68_RNase, Hs68_control, Nhek, K562, H1hesc, Gm12878, Ag04450, Sknshra	None	ANNOTATED, CDS, coding, INTERNAL, OVCODE, OVEXON	NM_015317	PUM2	Jeck2013, Salzman2013
chr4_56277781_56284152_+	hsa_circ_0001414	6372	585	HEK293, cd_19, K562, Huvec, Hsmm, Hepg2, Helas3, H1hesc, Gm12878, Bj, Ag04450, A549, Nhek, Nhlf, Sknshra, Mcf7	None	ANNOTATED, CDS, coding, INTERNAL	NM_018475	TMEM165	Memczak2013, Salzman2013
chr18_76953183_76974038_+	hsa_circ_0003275	20856	234	Hs68_RNase, Hs68_control, K562, Helas3, H1hesc, Gm12878, Bj, Ag04450, A549	None	ANNOTATED, CDS, coding, INTERNAL, OVCODE, OVEXON	NM_198531	ATP9B	Jeck2013, Salzman2013
chr17_79580344_79596831_-	hsa_circ_0046209	16488	371	K562, Helas3, H1hesc, Gm12878, A549	NA	ANNOTATED, CDS, coding, INTERNAL, OVCODE, OVEXON	NM_017921	NPLOC4	Salzman2013
chr2_189248490_189348219_+	hsa_circ_0057340	99730	261	Ag04450	NA	ANNOTATED, INTERNAL, ncRNA, OVCODE, OVEXON	NR_045563	GULP1	Salzman2013
chr4_174169131_174169591_+	hsa_circ_0001458	461	461	HEK293, cd_19, cd_34, neutr, Hs68_RNase, Hs68_control	None	ANNOTATED, CDS, coding, INTERNAL, OVCODE, OVEXON	NM_017423	GALNT7	Jeck2013, Memczak2013
chr15_69715498_69718796_+	hsa_circ_0036084	3299	406	Ag04450, A549	NA	ANNOTATED, CDS, coding, INTERNAL, OVCODE, OVEXON	NM_138555	KIF23	Salzman2013
chr12_64456697_64458999_+	hsa_circ_0008940	2303	324	Hs68_RNase, Hs68_control, Bj, Ag04450, A549, Mcf7	None	ANNOTATED, CDS, coding, INTERNAL, OVCODE, OVEXON	NM_020762	SRGAP1	Jeck2013, Salzman2013
chr2_32703703_32707650_+	hsa_circ_0007917	3948	628	Hs68_RNase, Hs68_control	None	ANNOTATED, CDS, coding, INTERNAL, OVCODE, OVEXON	NM_016252	BIRC6	Jeck2013
chr14_68290259_68301913_+	hsa_circ_0032305	11655	317	Nhek, K562, Gm12878	NA	ANNOTATED, CDS, coding, INTERNAL, OVCODE, OVEXON, UTR5	NM_133509	RAD51B	Salzman2013
chr20_48256215_48257202_-	hsa_circ_0004868	988	311	Hs68_RNase, Hs68_control	None	ANNOTATED, CDS, coding, INTERNAL, OVCODE, OVEXON	NM_004776	B4GALT5	Jeck2013
chr9_114148657_114154104_-	hsa_circ_0001882	5448	435	cd_34, neutr, Hs68_RNase, Hs68_control	None	ANNOTATED, CDS, coding, INTERNAL, OVCODE, OVEXON	NM_001080398	KIAA0368	Jeck2013, Memczak2013
chr12_120260624_120272032_-	hsa_circ_0002645	11409	595	Hs68_RNase, Hs68_control, K562, Huvec, A549	None	ANNOTATED, CDS, coding, INTERNAL, OVCODE, OVEXON	NM_001206999	CIT	Jeck2013, Salzman2013
chr14_95606996_95608085_-	hsa_circ_0000564	1090	167	cd_19, Hs68_RNase, Hs68_control, K562	None	ALT_ACCEPTOR, coding, OVEXON, upstream_start, UTR5	NM_030621	DICER1	Jeck2013, Memczak2013, Salzman2013
chr2_190656516_190682906_+	hsa_circ_0001083	26391	602	HEK293, cd_19, neutr, Hs68_RNase, Hs68_control, Nhek, K562, Bj, Ag04450, A549	None	ANNOTATED, CDS, coding, INTERNAL, OVCODE, OVEXON, UTR5	NM_001128143	PMS1	Jeck2013, Memczak2013, Salzman2013
chr17_47388674_47389404_-	hsa_circ_0003258	731	261	Hs68_RNase, Hs68_control, Nhek, K562, Hepg2, Helas3, H1hesc, Gm12878, Bj, Ag04450, A549, Nhlf, Sknshra	None	ANNOTATED, CDS, coding, INTERNAL, OVCODE, OVEXON	NM_001145365	ZNF652	Jeck2013, Salzman2013
chr9_116018394_116021142_+	hsa_circ_0088129	2749	406	K562, Helas3, Ag04450, A549	NA	ANNOTATED, CDS, coding, INTERNAL, OVCODE, OVERLAPTX, OVEXON, UTR5	NM_001859	SLC31A1	Salzman2013
chr11_128910823_128936763_-	hsa_circ_0024837	25941	514	Bj	NA	ANNOTATED, CDS, coding, INTERNAL, OVCODE, OVEXON	NM_001142685	ARHGAP32	Salzman2013
chr7_32582753_32599076_+	hsa_circ_0079762	16324	1122	K562, Huvec, H1hesc, Gm12878, Bj, Ag04450, A549, Sknshra, Mcf7	NA	ANNOTATED, CDS, coding, INTERNAL, OVCODE, OVEXON	NM_015060	AVL9	Salzman2013
chr3_101389974_101391057_-	hsa_circ_0003179	1084	468	Hs68_RNase, Hs68_control	None	ANNOTATED, CDS, coding, INTERNAL, OVCODE, OVEXON	NM_014415	ZBTB11	Jeck2013
chr6_76412361_76421132_+	hsa_circ_0077096	8772	621	K562, Huvec, H1hesc, Gm12878, Bj, Ag04450, A549, Sknshra	NA	ANNOTATED, CDS, coding, INTERNAL, OVCODE, OVEXON	NM_015571	SENP6	Salzman2013
chr2_99802640_99812219_+	hsa_circ_0001051	9580	564	cd_19, Hs68_RNase, Hs68_control, K562, Hepg2, Helas3, H1hesc, Gm12878, A549, Sknshra	None	ANNOTATED, INTERNAL, ncRNA, OVCODE, OVEXON	NR_028356	MRPL30	Jeck2013, Memczak2013, Salzman2013
chr17_57158458_57165768_-	hsa_circ_0044826	7311	328	Mcf7	NA	ANNOTATED, CDS, coding, INTERNAL, OVCODE, OVEXON	NM_015294	TRIM37	Salzman2013
chr6_83728692_83754378_-	hsa_circ_0004908	25687	645	Hs68_RNase, Hs68_control, K562, Ag04450, A549, Nhek	None	ANNOTATED, CDS, coding, INTERNAL, OVCODE, OVEXON	NM_198920	UBE2CBP	Jeck2013, Salzman2013
chr15_78837211_78838106_+	hsa_circ_0003590	896	220	Hs68_RNase, Hs68_control, Nhek, K562, Huvec, H1hesc, Gm12878, Bj, Ag04450, A549, Sknshra, Mcf7	None	ANNOTATED, CDS, coding, INTERNAL, OVCODE, OVEXON	NM_002789	PSMA4	Jeck2013, Salzman2013
chr9_22046750_22097363_+	hsa_circ_0008796	50614	1719	Hs68_RNase, Hs68_control, Helas3, Gm12878, Bj, Ag04450	None	ANNOTATED, INTERNAL, ncRNA, OVEXON	NR_003529	CDKN2B-AS	Jeck2013, Salzman2013
chr1_150997087_150998149_+	hsa_circ_0006760	1063	344	Hs68_RNase, Hs68_control, K562, H1hesc, Gm12878	None	ANNOTATED, CDS, coding, INTERNAL, OVCODE, OVEXON	NM_021222	PRUNE	Jeck2013, Salzman2013
chr4_7006571_7016284_+	hsa_circ_0069117	9714	487	K562, Gm12878, A549	NA	ANNOTATED, CDS, coding, INTERNAL, OVCODE, OVEXON	NM_020773	TBC1D14	Salzman2013
chr6_74190398_74191967_+	hsa_circ_0004973	1570	456	Hs68_RNase, Hs68_control, K562, Huvec, Hepg2, Helas3, H1hesc, Gm12878, Bj, Ag04450, A549, Nhek, Nhlf, Sknshra, Mcf7	None	ANNOTATED, CDS, coding, INTERNAL, OVCODE, OVEXON	NM_001123226	MTO1	Jeck2013, Salzman2013
chr7_98985662_98987635_+	hsa_circ_0004299	1974	331	Hs68_RNase, Hs68_control	None	ANNOTATED, CDS, coding, INTERNAL, OVCODE, OVEXON	NM_005720	ARPC1B	Jeck2013
chr20_36685934_36694658_+	hsa_circ_0007365	8725	416	Hs68_RNase, Hs68_control, K562, Helas3, Gm12878, Ag04450, A549, Sknshra	None	ANNOTATED, CDS, coding, INTERNAL, OVCODE, OVEXON	NM_021215	RPRD1B	Jeck2013, Salzman2013
chr16_2498856_2499916_+	hsa_circ_0037533	1061	393	Nhek, Hepg2, H1hesc, A549	NA	ANNOTATED, CDS, coding, INTERNAL, OVCODE, OVEXON	NM_001761	CCNF	Salzman2013
chr1_156921365_156925591_-	hsa_circ_0014815	4227	254	Huvec, Ag04450, A549	NA	ANNOTATED, CDS, coding, INTERNAL, OVCODE, OVEXON	NM_198236	ARHGEF11	Salzman2013
chr3_183558358_183562114_-	hsa_circ_0068252	3757	317	K562, Helas3, H1hesc, Mcf7	NA	ANNOTATED, CDS, coding, INTERNAL, OVCODE, OVEXON	NM_018622	PARL	Salzman2013
chr3_12353879_12434251_+	hsa_circ_0064336	80373	611	Helas3, Ag04450, A549	NA	ANNOTATED, CDS, coding, INTERNAL, OVCODE, OVERLAPTX, OVEXON, UTR5	NM_138711	PPARG	Salzman2013
chr10_94291505_94297307_-	hsa_circ_0000251	5803	563	cd_19, Nhek, K562, Huvec, H1hesc, Bj	None	ANNOTATED, CDS, coding, INTERNAL	NM_004969	IDE	Memczak2013, Salzman2013
chr15_28389019_28391490_-	hsa_circ_0003398	2472	518	Hs68_RNase, Hs68_control	None	ANNOTATED, CDS, coding, INTERNAL, OVCODE, OVEXON	NM_004667	HERC2	Jeck2013
chr2_30748453_30756180_+	hsa_circ_0000987	7728	368	cd_34, Hs68_RNase, Hs68_control, Nhek, K562, H1hesc, Ag04450, A549, Sknshra	None	ANNOTATED, CDS, coding, INTERNAL, OVCODE, OVEXON	NM_182551	LCLAT1	Jeck2013, Memczak2013, Salzman2013
chr7_1937836_2041756_-	hsa_circ_0004728	103921	639	Hs68_RNase, Hs68_control	None	ANNOTATED, CDS, coding, INTERNAL, OVCODE, OVEXON	NM_003550	MAD1L1	Jeck2013
chr8_101232507_101237567_+	hsa_circ_0085112	5061	320	Hepg2, Mcf7	NA	ANNOTATED, CDS, coding, INTERNAL, OVCODE, OVEXON	NM_003114	SPAG1	Salzman2013
chr9_5732388_5738538_+	hsa_circ_0003084	6151	181	Hs68_RNase, Hs68_control, Hepg2, Gm12878, Sknshra	None	ANNOTATED, CDS, coding, INTERNAL, OVCODE, OVEXON	NM_020829	KIAA1432	Jeck2013, Salzman2013
chr1_150429764_150430046_+	hsa_circ_0014014	283	283	K562, Huvec, H1hesc, Gm12878	NA	ANNOTATED, CDS, coding, INTERNAL, OVCODE, OVEXON	NM_015203	RPRD2	Salzman2013
chr14_50136242_50141145_-	hsa_circ_0004904	4904	247	Hs68_RNase, Hs68_control, Nhek, K562, Helas3, H1hesc, Gm12878, Ag04450, A549, Sknshra, Mcf7	None	ANNOTATED, CDS, coding, INTERNAL, OVCODE, OVEXON	NM_002692	POLE2	Jeck2013, Salzman2013
chr4_113483527_113506881_-	hsa_circ_0070680	23355	781	K562, Hepg2, Helas3, H1hesc, Gm12878, Bj, A549, Sknshra	NA	ANNOTATED, CDS, coding, INTERNAL, OVCODE, OVERLAPTX, OVEXON	NM_018392	C4orf21	Salzman2013
chr11_85722073_85742653_-	hsa_circ_0000347	20581	635	cd_19, neutr, K562, Hsmm, Hepg2, Helas3, H1hesc, Gm12878, Bj, Ag04450, Nhek, Sknshra	None	ANNOTATED, CDS, coding, INTERNAL	NM_007166	PICALM	Memczak2013, Salzman2013
chr13_47285926_47308133_+	hsa_circ_0030213	22208	558	K562, A549	NA	ANNOTATED, CDS, coding, INTERNAL, OVCODE, OVEXON	NM_001164211	LRCH1	Salzman2013
chr18_9524592_9525849_+	hsa_circ_0005158	1258	294	Hs68_RNase, Hs68_control, K562, Ag04450, Sknshra	None	ANNOTATED, CDS, coding, INTERNAL, OVCODE, OVEXON	NM_006788	RALBP1	Jeck2013, Salzman2013
chr18_21660549_21663045_+	hsa_circ_0002403	2497	524	Hs68_RNase, Hs68_control, Gm12878	None	ANNOTATED, CDS, coding, INTERNAL, OVCODE, OVEXON	NM_001135993	TTC39C	Jeck2013, Salzman2013
chr20_35812583_35812776_+	hsa_circ_0005759	194	194	Hs68_RNase, Hs68_control, Nhek, K562, Huvec, Hsmm, Hepg2, Helas3, H1hesc, Gm12878, Bj, Ag04450, A549, Sknshra	None	ANNOTATED, CDS, coding, INTERNAL, OVCODE, OVEXON	NM_002951	RPN2	Jeck2013, Salzman2013
chr2_242343243_242352836_+	hsa_circ_0059071	9594	440	Nhek, K562, Helas3, Gm12878, Bj, Ag04450, A549	NA	ANNOTATED, CDS, coding, INTERNAL, OVCODE, OVEXON	NM_014808	FARP2	Salzman2013
chr11_66254011_66255478_+	hsa_circ_0022989	1468	307	Hepg2, Helas3, H1hesc, Gm12878, Bj, Ag04450, Mcf7	NA	ANNOTATED, CDS, coding, INTERNAL, OVCODE, OVEXON	NM_130443	DPP3	Salzman2013
chr7_158590633_158591763_-	hsa_circ_0083225	1131	177	K562	NA	ANNOTATED, CDS, coding, INTERNAL, OVCODE, OVEXON	NM_020728	ESYT2	Salzman2013
chr17_73038276_73038754_-	hsa_circ_0006942	479	228	Hs68_RNase, Hs68_control, Nhek, K562, Hepg2, Helas3, H1hesc, Gm12878, Bj, Ag04450, A549, Sknshra	None	ANNOTATED, CDS, coding, INTERNAL, OVCODE, OVEXON, UTR5	NM_006356	ATP5H	Jeck2013, Salzman2013
chr5_142779221_142780417_-	hsa_circ_0001543	1197	1197	cd_19, Hs68_RNase, Hs68_control, K562, Hepg2, Helas3, Gm12878, Ag04450, A549, Nhek, Nhlf	None	ANNOTATED, CDS, coding, INTERNAL, OVCODE, OVEXON, UTR5	NM_001018074	NR3C1	Jeck2013, Memczak2013, Salzman2013
chr1_23356962_23377013_+	hsa_circ_0009061	20052	360	Hs68_RNase, Hs68_control, Nhek, K562, Hepg2, Helas3, H1hesc, Gm12878, Bj, Ag04450, A549, Sknshra	None	ANNOTATED, CDS, coding, INTERNAL, OVCODE, OVEXON	NM_001009999	KDM1A	Jeck2013, Salzman2013
chr1_197611841_197742062_-	hsa_circ_0015794	130222	655	Ag04450	NA	ANNOTATED, CDS, coding, INTERNAL, OVCODE, OVERLAPTX, OVEXON	NM_001195215	DENND1B	Salzman2013
chr2_172305191_172314585_+	hsa_circ_0005904	9395	411	Hs68_RNase, Hs68_control, K562, Hepg2, H1hesc, Gm12878, Bj, Ag04450, A549, Mcf7	None	ANNOTATED, CDS, coding, INTERNAL, OVCODE, OVEXON	NM_025000	DCAF17	Jeck2013, Salzman2013
chr2_175779786_175816930_-	hsa_circ_0007941	37145	241	Hs68_RNase, Hs68_control, Hepg2, Helas3, H1hesc, Bj, A549, Sknshra	None	ANNOTATED, CDS, coding, INTERNAL, OVCODE, OVEXON	NM_001822	CHN1	Jeck2013, Salzman2013
chr8_61496767_61504528_+	hsa_circ_0003183	7762	288	Hs68_RNase, Hs68_control, K562, H1hesc, Ag04450	None	ANNOTATED, CDS, coding, INTERNAL, OVCODE, OVEXON	NM_002865	RAB2A	Jeck2013, Salzman2013
chr17_63739186_63746842_-	hsa_circ_0002910	7657	213	Hs68_RNase, Hs68_control, H1hesc, Ag04450, A549	None	ANNOTATED, CDS, coding, INTERNAL, OVCODE, OVEXON	NM_145036	CEP112	Jeck2013, Salzman2013
chr11_68115315_68133170_+	hsa_circ_0023182	17856	924	K562, Hepg2, Helas3, H1hesc, Gm12878, Bj, A549	NA	ANNOTATED, CDS, coding, INTERNAL, OVCODE, OVEXON	NM_002335	LRP5	Salzman2013
chr5_124036707_124036962_-	hsa_circ_0001523	256	256	HEK293, cd_19, Hs68_RNase, Hs68_control, K562, Huvec, Hsmm, Hmec, Helas3, H1hesc, Gm12878, Ag04450, A549, Nhek, Nhlf, Sknshra	None	ANNOTATED, CDS, coding, INTERNAL, OVCODE, OVEXON	NM_020747	ZNF608	Jeck2013, Memczak2013, Salzman2013
chr1_94037227_94041686_-	hsa_circ_0013213	4460	288	Nhek, Gm12878	NA	ANNOTATED, CDS, coding, INTERNAL, OVCODE, OVEXON	NM_003567	BCAR3	Salzman2013
chr4_85800559_85853516_-	hsa_circ_0002283	52958	17699	Hs68_RNase, Hs68_control	None	ALT_DONOR, coding, INTERNAL, intronic, OVEXON, UTR5	NM_014991	WDFY3	Jeck2013
chr16_88008654_88017865_+	hsa_circ_0040809	9212	448	Nhek, K562, Hepg2, Helas3, H1hesc, Gm12878, Bj, Ag04450, A549, Sknshra, Mcf7	NA	ANNOTATED, CDS, coding, INTERNAL, OVCODE, OVEXON, UTR5	NM_001173540	BANP	Salzman2013
chr18_9208655_9221997_+	hsa_circ_0003652	13343	639	Hs68_RNase, Hs68_control, K562, A549	None	ANNOTATED, CDS, coding, INTERNAL, OVCODE, OVEXON	NM_001204056	ANKRD12	Jeck2013, Salzman2013
chr12_6630964_6632512_+	hsa_circ_0025162	1549	500	Gm12878, Bj, A549	NA	ANNOTATED, CDS, coding, INTERNAL, OVCODE, OVEXON	NM_014865	NCAPD2	Salzman2013
chr9_100372628_100373981_-	hsa_circ_0087667	1354	232	K562, H1hesc, Ag04450	NA	ANNOTATED, CDS, coding, INTERNAL, OVCODE, OVEXON	NM_139246	TSTD2	Salzman2013
chr12_27149675_27152609_-	hsa_circ_0007683	2935	272	Hs68_RNase, Hs68_control	None	ANNOTATED, CDS, coding, INTERNAL, OVCODE, OVEXON	NM_016551	TM7SF3	Jeck2013
chr4_140624609_140625350_+	hsa_circ_0070997	742	263	K562, Hepg2, Helas3, Gm12878	NA	ANNOTATED, CDS, coding, INTERNAL, OVCODE, OVEXON, UTR3	NM_001204366	MGST2	Salzman2013
chr8_141900642_141900868_-	hsa_circ_0002666	227	227	Hs68_RNase, Hs68_control, K562, Bj, A549	None	ANNOTATED, CDS, coding, INTERNAL, OVCODE, OVEXON, UTR5	NM_001199649	PTK2	Jeck2013, Salzman2013
chr11_65202524_65205128_+	hsa_circ_0006417	2605	2605	Hs68_RNase, Hs68_control	None	INTERGENIC	None	None	Jeck2013
chr8_15588175_15605974_+	hsa_circ_0083396	17800	230	K562, H1hesc, Ag04450	NA	ANNOTATED, CDS, coding, INTERNAL, OVCODE, OVEXON	NM_006765	TUSC3	Salzman2013
chr4_4650704_4651269_+	hsa_circ_0009031	566	303	Hs68_RNase, Hs68_control	LTR, SINE	ANNOTATED, INTERNAL, ncRNA, OVEXON	NR_037888	LOC100507266	Jeck2013
chr2_242343243_242357524_+	hsa_circ_0004924	14282	588	Hs68_RNase, Hs68_control, K562, Huvec, Hepg2, Helas3, Gm12878, Ag04450, A549	None	ANNOTATED, CDS, coding, INTERNAL, OVCODE, OVEXON	NM_014808	FARP2	Jeck2013, Salzman2013
chr6_30856465_30857207_+	hsa_circ_0005133	743	743	Hs68_RNase, Hs68_control	None	INTERGENIC	None	None	Jeck2013
chr3_63898264_63898901_+	hsa_circ_0007761	638	405	Hs68_RNase, Hs68_control, Nhek, K562, Huvec, Hepg2, Helas3, H1hesc, Gm12878, Bj, Ag04450, A549, Sknshra, Mcf7	None	ANNOTATED, CDS, coding, INTERNAL, OVCODE, OVEXON, UTR5	NM_000333	ATXN7	Jeck2013, Salzman2013
chr3_33661095_33673863_-	hsa_circ_0064783	12769	455	Nhek, K562	NA	ANNOTATED, CDS, coding, INTERNAL, OVCODE, OVEXON	NM_001207044	CLASP2	Salzman2013
chr7_6624647_6624891_+	hsa_circ_0079385	245	245	Nhek, K562, Huvec, Hepg2, Helas3, H1hesc, Gm12878, Bj, Ag04450, A549, Sknshra, Mcf7	NA	ANNOTATED, CDS, coding, INTERNAL, OVCODE, OVERLAPTX, OVEXON	NM_001134387	ZDHHC4	Salzman2013
chr5_170610203_170632616_+	hsa_circ_0002713	22414	334	Hs68_RNase, Hs68_control	None	ALT_ACCEPTOR, CDS, coding, INTERNAL, OVCODE, OVEXON	NM_022897	RANBP17	Jeck2013
chr19_34685383_34706566_+	hsa_circ_0008030	21184	660	Hs68_RNase, Hs68_control, K562, Helas3, Gm12878, Bj, Ag04450, A549, Sknshra	None	ANNOTATED, CDS, coding, INTERNAL, OVCODE, OVEXON	NM_001114093	LSM14A	Jeck2013, Salzman2013
chr19_14854232_14854596_-	hsa_circ_0049792	365	280	K562	NA	ANNOTATED, CDS, coding, INTERNAL, OVCODE, OVEXON	NM_013447	EMR2	Salzman2013
chr7_140055468_140058585_-	hsa_circ_0004069	3118	243	Hs68_RNase, Hs68_control, Nhek, K562, Huvec, Hsmm, Helas3, H1hesc, Gm12878, Bj, Ag04450, A549, Sknshra	None	ANNOTATED, CDS, coding, INTERNAL, OVCODE, OVEXON	NM_207113	SLC37A3	Jeck2013, Salzman2013
chr16_89484692_89497734_-	hsa_circ_0000727	13043	13043	cd_34, neutr, Hs68_RNase, Hs68_control	None	ALT_ACCEPTOR, coding, INTERNAL, intronic, OVEXON, UTR5	NM_013275	ANKRD11	Jeck2013, Memczak2013
chr12_69985839_69987393_+	hsa_circ_0027528	1555	333	Ag04450, Sknshra	NA	ANNOTATED, CDS, coding, INTERNAL, OVCODE, OVEXON	NM_001198842	CCT2	Salzman2013
chr14_76633006_76644385_+	hsa_circ_0005212	11380	445	Hs68_RNase, Hs68_control	None	ANNOTATED, CDS, coding, INTERNAL, OVCODE, OVEXON	NM_017926	C14orf118	Jeck2013
chr3_31617888_31621588_+	hsa_circ_0001278	3701	397	HEK293, cd_19, cd_34, Hs68_RNase, Hs68_control, Nhek, K562, Huvec, Hepg2, Helas3, H1hesc, Gm12878, Bj, Ag04450, A549, Sknshra, Mcf7	None	ANNOTATED, CDS, coding, INTERNAL, OVCODE, OVEXON	NM_178862	STT3B	Jeck2013, Memczak2013, Salzman2013
chrX_2644301_2656297_+	hsa_circ_0089814	11997	11997	K562, Huvec, Bj, Ag04450	NA	INTERGENIC	None	None	Salzman2013
chr2_201994452_201997857_+	hsa_circ_0057745	3406	524	Gm12878	NA	ANNOTATED, CDS, coding, INTERNAL, OVCODE, OVEXON, UTR5	NM_001127183	CFLAR	Salzman2013
chr22_42912017_42973104_-	hsa_circ_0001242	61088	57654	HEK293, cd_19, cd_34	None	ALT_ACCEPTOR, CDS, coding, upstream_start, UTR5	NM_015703	RRP7A	Memczak2013
chr11_3726430_3727857_-	hsa_circ_0020875	1428	340	K562, Helas3, H1hesc, Ag04450	NA	ANNOTATED, CDS, coding, INTERNAL, OVCODE, OVERLAPTX, OVEXON	NM_016320	NUP98	Salzman2013
chr11_120916383_120930794_+	hsa_circ_0003302	14412	973	Hs68_RNase, Hs68_control, K562, Huvec, Hepg2, Helas3, H1hesc, Gm12878, Bj, Ag04450, A549, Nhek, Sknshra	None	ANNOTATED, CDS, coding, INTERNAL, OVCODE, OVEXON, UTR5	NM_152715	TBCEL	Jeck2013, Salzman2013
chr2_120830754_120836157_+	hsa_circ_0001064	5404	518	cd_19, Hs68_RNase, Hs68_control, Nhek, K562, Huvec, Hepg2, Gm12878, A549, Sknshra	None	ANNOTATED, CDS, coding, INTERNAL, OVCODE, OVEXON	NM_001184939	EPB41L5	Jeck2013, Memczak2013, Salzman2013
chr17_28934570_28937960_+	hsa_circ_0004832	3391	301	Hs68_RNase, Hs68_control	None	ANNOTATED, INTERNAL, ncRNA, OVEXON	NR_015341	LRRC37BP1	Jeck2013
chr1_65830318_65831879_+	hsa_circ_0002454	1562	350	Hs68_RNase, Hs68_control, Nhek, K562, Huvec, Hepg2, Helas3, H1hesc, Gm12878, Bj, A549, Sknshra	None	ANNOTATED, CDS, coding, INTERNAL, OVCODE, OVEXON	NM_014787	DNAJC6	Jeck2013, Salzman2013
chr12_102542008_102559661_+	hsa_circ_0000432	17654	668	cd_19, neutr	None	ANNOTATED, CDS, coding, INTERNAL	NM_017915	C12orf48	Memczak2013
chr12_124071294_124074996_+	hsa_circ_0000458	3703	301	cd_19, Hs68_RNase, Hs68_control	None	ANNOTATED, CDS, coding, INTERNAL, OVCODE, OVEXON	NM_006815	TMED2	Jeck2013, Memczak2013
chr12_110566755_110570441_+	hsa_circ_0005591	3687	271	Hs68_RNase, Hs68_control	None	ANNOTATED, CDS, coding, INTERNAL, OVCODE, OVEXON	NM_014055	IFT81	Jeck2013
chr3_52946554_52947633_-	hsa_circ_0066143	1080	250	Nhek, A549	NA	ANNOTATED, CDS, coding, INTERNAL, OVCODE, OVEXON	NM_001005159	SFMBT1	Salzman2013
chr3_37291189_37315092_+	hsa_circ_0001282	23904	1853	cd_19, Hs68_RNase, Hs68_control	None	ALT_ACCEPTOR, CDS, coding, INTERNAL, intronic, OVCODE, OVEXON	NM_001172713	GOLGA4	Jeck2013, Memczak2013
chr8_62588699_62596747_-	hsa_circ_0005335	8049	444	Hs68_RNase, Hs68_control	None	ALT_DONOR, CDS, coding, INTERNAL, OVCODE, OVEXON	NM_001164756	ASPH	Jeck2013
chr11_118629483_118634015_-	hsa_circ_0000360	4533	347	cd_19, K562, H1hesc, Ag04450, Sknshra	None	ANNOTATED, CDS, coding, INTERNAL	NM_004397	DDX6	Memczak2013, Salzman2013
chr1_46105882_46108171_-	hsa_circ_0008774	2290	267	Hs68_RNase, Hs68_control	None	ANNOTATED, CDS, coding, INTERNAL, OVCODE, OVEXON	NM_021639	GPBP1L1	Jeck2013
chr3_8977555_8983488_-	hsa_circ_0001264	5934	623	HEK293, cd_19, Hs68_RNase, Hs68_control	None	ANNOTATED, CDS, coding, INTERNAL, OVCODE, OVEXON	NM_020165	RAD18	Jeck2013, Memczak2013
chr8_17092225_17094882_-	hsa_circ_0008752	2658	307	Hs68_RNase, Hs68_control, Nhek, K562, Huvec, Hepg2, Helas3, H1hesc, Gm12878, Bj, Ag04450, A549, Nhlf, Sknshra	None	ANNOTATED, CDS, coding, INTERNAL, OVCODE, OVEXON	NM_013354	CNOT7	Jeck2013, Salzman2013
chr6_57244699_57246966_+	hsa_circ_0004233	2268	234	Hs68_RNase, Hs68_control	None	ANNOTATED, CDS, coding, INTERNAL, OVCODE, OVEXON	NM_000947	PRIM2	Jeck2013
chr9_130101924_130104613_+	hsa_circ_0088633	2690	223	K562, Hepg2, H1hesc, Gm12878, A549, Sknshra, Mcf7	NA	ANNOTATED, CDS, coding, INTERNAL, OVCODE, OVEXON	NM_032293	GARNL3	Salzman2013
chr12_123798167_123800207_-	hsa_circ_0005310	2041	285	Hs68_RNase, Hs68_control, K562, Huvec	None	ANNOTATED, CDS, coding, INTERNAL, OVCODE, OVEXON	NM_001167856	SBNO1	Jeck2013, Salzman2013
chr9_129102787_129148937_+	hsa_circ_0088608	46151	328	Huvec	NA	ANNOTATED, CDS, coding, INTERNAL, OVCODE, OVERLAPTX, OVEXON	NM_033446	FAM125B	Salzman2013
chr16_23424769_23428442_-	hsa_circ_0002902	3674	272	Hs68_RNase, Hs68_control	None	ANNOTATED, CDS, coding, INTERNAL, OVCODE, OVEXON	NM_153603	COG7	Jeck2013
chr9_6880012_6893232_+	hsa_circ_0001839	13221	292	HEK293, cd_19, Hs68_RNase, Hs68_control, K562, Hepg2, Helas3, H1hesc, Gm12878, Bj, Ag04450, A549, Nhek, Sknshra	None	ANNOTATED, CDS, coding, INTERNAL, OVCODE, OVEXON	NM_001146694	KDM4C	Jeck2013, Memczak2013, Salzman2013
chr2_217054948_217057458_+	hsa_circ_0058181	2511	207	K562, A549	NA	ANNOTATED, CDS, coding, INTERNAL, OVCODE, OVEXON	NM_021141	XRCC5	Salzman2013
chr3_121563300_121591635_+	hsa_circ_0066971	28336	630	Gm12878	NA	ANNOTATED, CDS, coding, INTERNAL, OVCODE, OVEXON	NM_018456	EAF2	Salzman2013
chr3_113505079_113508687_+	hsa_circ_0002640	3609	424	Hs68_RNase, Hs68_control, H1hesc	None	ANNOTATED, CDS, coding, INTERNAL, OVCODE, OVEXON	NM_001690	ATP6V1A	Jeck2013, Salzman2013
chr8_141840571_141874498_-	hsa_circ_0002908	33928	286	Hs68_RNase, Hs68_control	None	ANNOTATED, CDS, coding, INTERNAL, OVCODE, OVEXON	NM_001199649	PTK2	Jeck2013
chr4_79747191_79772210_+	hsa_circ_0070190	25020	705	K562, Huvec, Hepg2, Helas3, H1hesc, Gm12878, Bj, Ag04450, Sknshra	NA	ANNOTATED, CDS, coding, INTERNAL, OVCODE, OVEXON	NM_198892	BMP2K	Salzman2013
chr5_170336665_170351554_+	hsa_circ_0002745	14890	979	Hs68_RNase, Hs68_control, Huvec, Hepg2, Helas3, H1hesc, Bj, Ag04450, A549	None	ANNOTATED, CDS, coding, INTERNAL, OVCODE, OVEXON	NM_022897	RANBP17	Jeck2013, Salzman2013
chr20_35315895_35317187_-	hsa_circ_0005523	1293	227	Hs68_RNase, Hs68_control, K562, Huvec, Hepg2, Helas3, H1hesc, Gm12878, Bj, Ag04450, A549, Sknshra	None	ANNOTATED, CDS, coding, INTERNAL, OVCODE, OVEXON	NM_032013	NDRG3	Jeck2013, Salzman2013
chr6_5368783_5369415_+	hsa_circ_0002958	633	633	Hs68_RNase, Hs68_control, K562, Hepg2, Helas3, H1hesc, Bj, Ag04450, Sknshra	None	ANNOTATED, CDS, coding, INTERNAL, OVCODE, OVEXON, UTR5	NM_006567	FARS2	Jeck2013, Salzman2013
chr9_7046862_7049200_+	hsa_circ_0086343	2339	165	K562, Ag04450	NA	ANNOTATED, CDS, coding, INTERNAL, OVCODE, OVEXON	NM_015061	KDM4C	Salzman2013
chr16_25264267_25266713_-	hsa_circ_0038702	2447	279	K562, Hepg2, Gm12878, Ag04450, A549	NA	ANNOTATED, CDS, coding, INTERNAL, OVCODE, OVEXON	NM_001012981	ZKSCAN2	Salzman2013
chr5_170667932_170669824_+	hsa_circ_0004738	1893	354	Hs68_RNase, Hs68_control, Helas3, H1hesc, Bj	None	ANNOTATED, CDS, coding, INTERNAL, OVCODE, OVEXON	NM_022897	RANBP17	Jeck2013, Salzman2013
chr2_148730308_148739650_-	hsa_circ_0004491	9343	396	Hs68_RNase, Hs68_control	None	ANNOTATED, CDS, coding, INTERNAL, OVCODE, OVEXON, UTR5	NM_001190879	ORC4	Jeck2013
chr7_618893_635941_-	hsa_circ_0079039	17049	342	K562, Hepg2, H1hesc, A549, Mcf7	NA	ANNOTATED, CDS, coding, INTERNAL, OVCODE, OVEXON	NM_001164761	PRKAR1B	Salzman2013
chr12_98921664_98931350_+	hsa_circ_0003517	9687	384	Hs68_RNase, Hs68_control, K562, Gm12878, Ag04450, Sknshra	None	ANNOTATED, CDS, coding, INTERNAL, OVCODE, OVEXON	NM_001032283	TMPO	Jeck2013, Salzman2013
chr4_54292039_54294350_+	hsa_circ_0069748	2312	251	K562, Huvec, Hepg2, Helas3, H1hesc, Gm12878, Bj, Ag04450, A549, Nhek, Nhlf, Sknshra, Mcf7	NA	ANNOTATED, CDS, coding, INTERNAL, OVCODE, OVEXON	NM_030917	FIP1L1	Salzman2013
chr2_168869144_168931741_-	hsa_circ_0005280	62598	409	Hs68_RNase, Hs68_control	None	ANNOTATED, CDS, coding, INTERNAL, OVCODE, OVEXON	NM_013233	STK39	Jeck2013
chr3_169889161_169896726_-	hsa_circ_0005362	7566	400	Hs68_RNase, Hs68_control, Nhek, K562, Hsmm, Hepg2, Helas3, H1hesc, Gm12878, Bj, Ag04450, A549, Nhlf, Sknshra, Mcf7	None	ANNOTATED, CDS, coding, INTERNAL, OVCODE, OVEXON	NM_024947	PHC3	Jeck2013, Salzman2013
chr12_107914264_107937916_+	hsa_circ_0028031	23653	355	A549, Sknshra	NA	ANNOTATED, CDS, coding, INTERNAL, OVCODE, OVEXON	NM_001018072	BTBD11	Salzman2013
chr5_74046404_74047318_-	hsa_circ_0001497	915	215	cd_19, Hs68_RNase, Hs68_control, K562, Helas3, H1hesc, Gm12878, Bj, Ag04450, A549, Nhek, Sknshra, Mcf7	None	ANNOTATED, CDS, coding, INTERNAL, OVCODE, OVEXON	NM_170681	GFM2	Jeck2013, Memczak2013, Salzman2013
chr2_160599572_160602448_+	hsa_circ_0056840	2877	361	K562, H1hesc, Ag04450	NA	ANNOTATED, CDS, coding, INTERNAL, OVCODE, OVEXON	NM_022826	MARCH7	Salzman2013
chr20_35668556_35675593_-	hsa_circ_0060228	7038	436	K562, Helas3	NA	ANNOTATED, CDS, coding, INTERNAL, OVCODE, OVEXON	NM_002895	RBL1	Salzman2013
chr10_123670421_123683844_-	hsa_circ_0003419	13424	477	Hs68_RNase, Hs68_control, K562, Hepg2	None	ANNOTATED, CDS, coding, INTERNAL, OVCODE, OVEXON	NM_007041	ATE1	Jeck2013, Salzman2013
chr10_74100547_74100928_-	hsa_circ_0008662	382	266	Hs68_RNase, Hs68_control, Nhek, K562, Huvec, Hsmm, Hepg2, Helas3, H1hesc, Gm12878, Bj, Ag04450, A549, Nhlf, Sknshra, Mcf7	None	ANNOTATED, CDS, coding, INTERNAL, OVCODE, OVEXON	NM_001002762	DNAJB12	Jeck2013, Salzman2013
chr5_130883740_130940386_-	hsa_circ_0073836	56647	426	K562	NA	ANNOTATED, CDS, coding, INTERNAL, OVCODE, OVEXON	NM_001164386	RAPGEF6	Salzman2013
chr10_128859932_128908618_+	hsa_circ_0020462	48687	287	Hepg2, H1hesc, A549	NA	ANNOTATED, CDS, coding, INTERNAL, OVCODE, OVERLAPTX, OVEXON	NM_001380	DOCK1	Salzman2013
chr22_28692186_28702631_-	hsa_circ_0002804	10446	552	Hs68_RNase, Hs68_control	None	ANNOTATED, CDS, coding, INTERNAL, OVCODE, OVEXON	NM_001145418	TTC28	Jeck2013
chr21_46275125_46281186_-	hsa_circ_0001200	6062	328	cd_19, Hs68_RNase, Hs68_control	None	ANNOTATED, CDS, coding, INTERNAL, OVCODE, OVEXON	NM_004339	PTTG1IP	Jeck2013, Memczak2013
chr1_32502511_32505174_+	hsa_circ_0002467	2664	463	Hs68_RNase, Hs68_control, K562, Bj, Ag04450, Sknshra	None	ANNOTATED, CDS, coding, INTERNAL, OVCODE, OVEXON	NM_006559	KHDRBS1	Jeck2013, Salzman2013
chr1_227327277_227335260_-	hsa_circ_0003659	7984	697	Hs68_RNase, Hs68_control, K562, Hepg2, Ag04450	None	ANNOTATED, CDS, coding, INTERNAL, OVCODE, OVEXON	NM_003607	CDC42BPA	Jeck2013, Salzman2013
chr12_56527201_56528212_+	hsa_circ_0007826	1012	418	Hs68_RNase, Hs68_control, K562, Huvec, Helas3, Gm12878, Sknshra	None	ANNOTATED, CDS, coding, INTERNAL, OVCODE, OVEXON	NM_001184796	ESYT1	Jeck2013, Salzman2013
chr15_73064124_73067438_-	hsa_circ_0000631	3315	289	HEK293, neutr, Hs68_RNase, Hs68_control, K562, Helas3, H1hesc, Gm12878, Ag04450	None	ANNOTATED, CDS, coding, INTERNAL, ncRNA, OVCODE, OVEXON	NM_031284	ADPGK	Jeck2013, Memczak2013, Salzman2013
chr1_245165423_245180628_+	hsa_circ_0008294	15206	197	Hs68_RNase, Hs68_control, K562	LINE	ANNOTATED, INTERNAL, ncRNA, OVCODE, OVEXON	NR_026586	EFCAB2	Jeck2013, Salzman2013
chr19_38198815_38202593_-	hsa_circ_0007819	3779	309	Hs68_RNase, Hs68_control, Bj	None	ANNOTATED, CDS, coding, INTERNAL, OVCODE, OVEXON, UTR5	NM_032689	ZNF607	Jeck2013, Salzman2013
chr17_62587202_62602758_-	hsa_circ_0002862	15557	348	Hs68_RNase, Hs68_control, Nhek, Huvec, H1hesc, Bj, Ag04450, Sknshra	None	ANNOTATED, CDS, coding, INTERNAL, OVCODE, OVEXON	NM_022739	SMURF2	Jeck2013, Salzman2013
chr4_139135739_139157605_-	hsa_circ_0070980	21867	514	Ag04450, A549	NA	ANNOTATED, CDS, coding, INTERNAL, OVCODE, OVEXON	NM_014331	SLC7A11	Salzman2013
chr5_135483521_135489852_+	hsa_circ_0007930	6332	731	Hs68_RNase, Hs68_control, K562, H1hesc, Gm12878, Ag04450, A549, Nhek	None	ANNOTATED, CDS, coding, INTERNAL, OVCODE, OVEXON, UTR5	NM_001001419	SMAD5	Jeck2013, Salzman2013
chr7_127447538_127544872_+	hsa_circ_0082141	97335	375	K562, Hepg2, Helas3, H1hesc, Gm12878, Ag04450, A549, Sknshra	NA	ANNOTATED, CDS, coding, INTERNAL, OVCODE, OVERLAPTX, OVEXON	NM_014390	SND1	Salzman2013
chr17_58756814_58767122_+	hsa_circ_0044974	10309	219	Gm12878	NA	ANNOTATED, CDS, coding, INTERNAL, OVCODE, OVEXON, UTR5	NM_001099432	BCAS3	Salzman2013
chr17_45214518_45216257_-	hsa_circ_0044224	1740	362	K562	NA	ANNOTATED, CDS, coding, INTERNAL, OVCODE, OVEXON	NM_001114091	CDC27	Salzman2013
chr21_38610761_38612940_-	hsa_circ_0061687	2180	294	K562, Hepg2, Gm12878, Ag04450	NA	ANNOTATED, CDS, coding, INTERNAL, OVCODE, OVEXON	NM_006052	DSCR3	Salzman2013
chr12_52139687_52145377_+	hsa_circ_0006763	5691	372	Hs68_RNase, Hs68_control, H1hesc, Bj, Ag04450, A549, Sknshra	None	ANNOTATED, CDS, coding, INTERNAL, OVCODE, OVEXON	NM_014191	SCN8A	Jeck2013, Salzman2013
chr20_33961987_33971936_-	hsa_circ_0060067	9950	277	K562, H1hesc, Gm12878	NA	ANNOTATED, CDS, coding, INTERNAL, OVCODE, OVEXON	NM_018244	UQCC	Salzman2013
chr2_109945680_109964405_+	hsa_circ_0003523	18726	18726	Hs68_RNase, Hs68_control	None	ALT_ACCEPTOR, CDS, coding, INTERNAL, intronic, OVCODE, OVEXON	NM_001099289	SH3RF3	Jeck2013
chr5_132219032_132220811_-	hsa_circ_0007945	1780	265	Hs68_RNase, Hs68_control, K562, Huvec, Hepg2, H1hesc, Gm12878, Bj, Ag04450, A549, Nhek, Sknshra	None	ANNOTATED, CDS, coding, INTERNAL, OVCODE, OVEXON	NM_014423	AFF4	Jeck2013, Salzman2013
chr1_197552282_197586889_-	hsa_circ_0015779	34608	477	Helas3, Bj, Ag04450	NA	ANNOTATED, CDS, coding, INTERNAL, OVCODE, OVERLAPTX, OVEXON	NM_001195215	DENND1B	Salzman2013
chr12_60098553_60098799_+	hsa_circ_0027346	247	247	Bj	NA	ANNOTATED, CDS, coding, INTERNAL, OVCODE, OVEXON, UTR5	NM_004731	SLC16A7	Salzman2013
chr16_72845476_72845937_-	hsa_circ_0007511	462	335	Hs68_RNase, Hs68_control, Nhek, Huvec, Hsmm, Hepg2, Helas3, H1hesc, Gm12878, Bj, Ag04450, A549, Nhlf, Sknshra, Mcf7	None	ANNOTATED, CDS, coding, INTERNAL, OVCODE, OVEXON	NM_006885	ZFHX3	Jeck2013, Salzman2013
chr1_167971720_167974031_+	hsa_circ_0015124	2312	475	K562, Hepg2, Helas3, A549	NA	ANNOTATED, CDS, coding, INTERNAL, OVCODE, OVEXON	NM_001198956	DCAF6	Salzman2013
chr3_133907681_133914026_-	hsa_circ_0005768	6346	323	Hs68_RNase, Hs68_control, Ag04450, Mcf7	None	ANNOTATED, CDS, coding, INTERNAL, OVCODE, OVEXON	NM_001005861	RYK	Jeck2013, Salzman2013
chr7_72877252_72884813_-	hsa_circ_0080483	7562	656	Nhek, K562, Gm12878, A549	NA	ANNOTATED, CDS, coding, INTERNAL, OVCODE, OVEXON	NM_032408	BAZ1B	Salzman2013
chr12_122332645_122341013_+	hsa_circ_0008670	8369	417	Hs68_RNase, Hs68_control, K562, Hsmm, Ag04450, A549, Nhlf	None	ANNOTATED, CDS, coding, INTERNAL, OVCODE, OVEXON	NM_002813	PSMD9	Jeck2013, Salzman2013
chr13_30854200_30857928_-	hsa_circ_0008651	3729	337	Hs68_RNase, Hs68_control, Bj, A549, Sknshra	None	ANNOTATED, CDS, coding, INTERNAL, OVCODE, OVEXON, UTR5	NM_032116	KATNAL1	Jeck2013, Salzman2013
chr11_61094251_61097546_-	hsa_circ_0003900	3296	454	Hs68_RNase, Hs68_control, K562, Hepg2, Ag04450	None	ANNOTATED, CDS, coding, INTERNAL, OVCODE, OVEXON	NM_001923	DDB1	Jeck2013, Salzman2013
chr17_20149239_20163607_+	hsa_circ_0003545	14369	589	Hs68_RNase, Hs68_control, K562, Hsmm, Hepg2, Helas3, H1hesc, Ag04450, A549	None	ANNOTATED, CDS, coding, INTERNAL, OVCODE, OVEXON	NM_001243439	SPECC1	Jeck2013, Salzman2013
chr13_21955573_21965993_-	hsa_circ_0029703	10421	463	Gm12878, Bj, A549	NA	ANNOTATED, CDS, coding, INTERNAL, OVCODE, OVEXON	NM_153251	ZDHHC20	Salzman2013
chr9_5689959_5720750_+	hsa_circ_0005707	30792	468	Hs68_RNase, Hs68_control, K562, Gm12878, Ag04450	None	ANNOTATED, CDS, coding, INTERNAL, OVCODE, OVEXON	NM_020829	KIAA1432	Jeck2013, Salzman2013
chr22_38208894_38209616_+	hsa_circ_0007513	723	249	Hs68_RNase, Hs68_control, Nhek, K562, Huvec, Hepg2, Helas3, H1hesc, Gm12878, Bj, Ag04450, A549, Sknshra	None	ANNOTATED, CDS, coding, INTERNAL, OVCODE, OVEXON	NM_001171690	GCAT	Jeck2013, Salzman2013
chr11_77336008_77340944_-	hsa_circ_0004593	4937	347	Hs68_RNase, Hs68_control	None	ANNOTATED, CDS, coding, INTERNAL, OVCODE, OVEXON	NM_001293	CLNS1A	Jeck2013
chr5_95084037_95103870_+	hsa_circ_0073440	19834	867	Bj, Sknshra	NA	ANNOTATED, CDS, coding, INTERNAL, OVCODE, OVERLAPTX, OVEXON	NM_014899	RHOBTB3	Salzman2013
chr14_105692406_105693097_-	hsa_circ_0006153	692	260	Hs68_RNase, Hs68_control, K562, Bj, Ag04450	None	ANNOTATED, CDS, coding, INTERNAL, OVCODE, OVEXON	NM_001519	BRF1	Jeck2013, Salzman2013
chr1_150997087_150999803_+	hsa_circ_0000126	2717	439	cd_19, K562, Gm12878, Ag04450, Sknshra	None	ANNOTATED, CDS, coding, INTERNAL	NM_021222	PRUNE	Memczak2013, Salzman2013
chr15_90760671_90763123_+	hsa_circ_0036763	2453	326	Nhek, K562, Hepg2, Helas3, H1hesc, Gm12878, Bj, Ag04450, A549, Sknshra	NA	ANNOTATED, CDS, coding, INTERNAL, OVCODE, OVEXON	NM_020210	SEMA4B	Salzman2013
chr8_42919244_42927450_+	hsa_circ_0006586	8207	347	Hs68_RNase, Hs68_control, K562, Helas3, A549	None	ANNOTATED, CDS, coding, INTERNAL, OVCODE, OVEXON	NM_002027	FNTA	Jeck2013, Salzman2013
chr5_32268807_32276848_-	hsa_circ_0072081	8042	502	K562	NA	ANNOTATED, CDS, coding, INTERNAL, OVCODE, OVEXON	NM_001040446	MTMR12	Salzman2013
chr16_21623966_21636436_+	hsa_circ_0002696	12471	586	Hs68_RNase, Hs68_control, Nhek, K562, Hepg2, Helas3, H1hesc, Ag04450, A549	None	ANNOTATED, CDS, coding, INTERNAL, OVCODE, OVEXON	NM_016025	METTL9	Jeck2013, Salzman2013
chr3_196098767_196129890_-	hsa_circ_0068651	31124	394	Nhek, K562, A549	NA	ANNOTATED, CDS, coding, INTERNAL, OVCODE, OVERLAPTX, OVEXON	NM_015562	UBXN7	Salzman2013
chr1_87181407_87185318_+	hsa_circ_0013081	3912	271	Huvec, Bj, Ag04450	NA	ANNOTATED, CDS, coding, INTERNAL, OVCODE, OVEXON	NM_001206651	SH3GLB1	Salzman2013
chr18_43702433_43704859_+	hsa_circ_0002481	2427	262	Hs68_RNase, Hs68_control, A549	None	ANNOTATED, INTERNAL, ncRNA, OVCODE, OVEXON	NR_026978	HAUS1	Jeck2013, Salzman2013
chr11_120345269_120348235_+	hsa_circ_0002100	2967	499	Hs68_RNase, Hs68_control, K562, Helas3, H1hesc, Bj, Ag04450, Nhek	None	ANNOTATED, CDS, coding, INTERNAL, OVCODE, OVEXON	NM_015313	ARHGEF12	Jeck2013, Salzman2013
chr15_33180373_33194241_-	hsa_circ_0008589	13869	458	Hs68_RNase, Hs68_control	None	ANNOTATED, CDS, coding, INTERNAL, OVCODE, OVEXON	NM_001103184	FMN1	Jeck2013
chr3_128514203_128516912_+	hsa_circ_0067233	2710	188	H1hesc, Bj, Ag04450, Mcf7	NA	ANNOTATED, CDS, coding, INTERNAL, OVCODE, OVEXON, UTR5	NM_004637	RAB7A	Salzman2013
chr4_106370507_106377902_-	hsa_circ_0070569	7396	164	K562	NA	ANNOTATED, CDS, coding, INTERNAL, OVCODE, OVEXON	NM_176869	PPA2	Salzman2013
chr9_14639894_14680160_-	hsa_circ_0008952	40267	796	Hs68_RNase, Hs68_control	None	ANNOTATED, CDS, coding, INTERNAL, OVCODE, OVEXON, UTR5	NM_178566	ZDHHC21	Jeck2013
chr17_80842021_80861354_+	hsa_circ_0046534	19334	329	Nhek, K562, Huvec, Hepg2, Helas3, H1hesc, Gm12878, Bj, Ag04450, A549, Sknshra, Mcf7	NA	ANNOTATED, CDS, coding, INTERNAL, OVCODE, OVEXON	NM_005993	TBCD	Salzman2013
chr2_39233553_39237844_-	hsa_circ_0054171	4292	401	K562	NA	ANNOTATED, CDS, coding, INTERNAL, OVCODE, OVERLAPTX, OVEXON	NM_005633	SOS1	Salzman2013
chr1_200729967_200784772_+	hsa_circ_0015839	54806	506	Nhek, K562, H1hesc, Ag04450	NA	ANNOTATED, CDS, coding, INTERNAL, OVCODE, OVEXON	NM_203459	CAMSAP2	Salzman2013
chr2_53977920_53992722_-	hsa_circ_0002416	14803	368	Hs68_RNase, Hs68_control	None	ANNOTATED, CDS, coding, INTERNAL, OVCODE, OVEXON, UTR5	NM_016115	ASB3	Jeck2013
chr2_172193963_172196064_-	hsa_circ_0057041	2102	421	Nhek, K562, Bj, Sknshra	NA	ANNOTATED, CDS, coding, INTERNAL, OVCODE, OVEXON	NM_024770	METTL8	Salzman2013
chr15_49517402_49531564_+	hsa_circ_0007487	14163	10884	Hs68_RNase, Hs68_control	LINE	ALT_ACCEPTOR, CDS, coding, INTERNAL, intronic, OVCODE, OVEXON	NM_001001556	GALK2	Jeck2013
chr20_35835676_35838568_+	hsa_circ_0007746	2893	296	Hs68_RNase, Hs68_control, Nhek, K562, Hepg2, Helas3, H1hesc, Gm12878, Ag04450, A549, Sknshra	None	ANNOTATED, CDS, coding, INTERNAL, OVCODE, OVEXON	NM_002951	RPN2	Jeck2013, Salzman2013
chr17_53150261_53158544_+	hsa_circ_0044699	8284	478	K562, Hepg2, H1hesc, Bj, Ag04450, A549	NA	ANNOTATED, CDS, coding, INTERNAL, OVCODE, OVEXON	NM_178509	STXBP4	Salzman2013
chr12_112096540_112097149_-	hsa_circ_0007885	610	249	Hs68_RNase, Hs68_control, K562, H1hesc, Ag04450	None	ANNOTATED, CDS, coding, INTERNAL, OVCODE, OVEXON	NM_006768	BRAP	Jeck2013, Salzman2013
chr1_169446393_169446995_-	hsa_circ_0015164	603	603	Nhek, K562, Helas3, H1hesc	NA	ANNOTATED, CDS, coding, INTERNAL, OVCODE, OVERLAPTX, OVEXON	NM_006996	SLC19A2	Salzman2013
chr10_4872867_4884696_+	hsa_circ_0017521	11830	798	K562, Huvec, A549	NA	ANNOTATED, CDS, coding, INTERNAL, OVCODE, OVEXON	NM_001040177	AKR1E2	Salzman2013
chr4_39739040_39776553_+	hsa_circ_0002590	37514	336	Hs68_RNase, Hs68_control, K562, Huvec, Hepg2, Helas3, H1hesc, Gm12878, Bj, Ag04450, A549, Nhek, Sknshra	None	ANNOTATED, CDS, coding, INTERNAL, OVCODE, OVEXON	NM_005339	UBE2K	Jeck2013, Salzman2013
chr10_99915850_99923154_+	hsa_circ_0004419	7305	6988	Hs68_RNase, Hs68_control	LINE	ALT_ACCEPTOR, coding, INTERNAL, intronic, OVEXON, UTR5	NM_014472	C10orf28	Jeck2013
chr8_131370263_131414216_-	hsa_circ_0003691	43954	315	Hs68_RNase, Hs68_control, Nhek, Huvec, Hsmm, Hepg2, Helas3, H1hesc, Gm12878, Bj, Ag04450, A549, Nhlf, Sknshra	None	ANNOTATED, CDS, coding, INTERNAL, OVCODE, OVEXON, UTR5	NM_001247996	ASAP1	Jeck2013, Salzman2013
chr8_141285757_141301177_-	hsa_circ_0085694	15421	510	K562, Gm12878, Bj	NA	ANNOTATED, CDS, coding, INTERNAL, OVCODE, OVEXON	NM_031466	TRAPPC9	Salzman2013
chr14_77930941_77932010_+	hsa_circ_0008404	1070	218	Hs68_RNase, Hs68_control, K562, Hepg2, Helas3, Gm12878, Bj, Ag04450, A549, Sknshra, Mcf7	None	ANNOTATED, CDS, coding, INTERNAL, OVCODE, OVEXON	NM_012111	AHSA1	Jeck2013, Salzman2013
chr15_72847612_72853890_+	hsa_circ_0036224	6279	216	Nhek, K562, Huvec, Helas3, A549	NA	ANNOTATED, CDS, coding, INTERNAL, OVCODE, OVEXON	NM_005744	ARIH1	Salzman2013
chr17_20921255_20931987_-	hsa_circ_0042472	10733	519	K562, Hepg2, Helas3, H1hesc, Gm12878, A549, Sknshra	NA	ANNOTATED, CDS, coding, INTERNAL, OVCODE, OVEXON	NM_015276	USP22	Salzman2013
chr20_47707279_47711500_+	hsa_circ_0060762	4222	645	K562, Hepg2, Helas3, Gm12878, Bj, Ag04450	NA	ANNOTATED, CDS, coding, INTERNAL, OVCODE, OVERLAPTX, OVEXON	NM_001316	CSE1L	Salzman2013
chr3_179481790_179483636_+	hsa_circ_0007541	1847	321	Hs68_RNase, Hs68_control	None	ANNOTATED, CDS, coding, INTERNAL, OVCODE, OVEXON	NM_003940	USP13	Jeck2013
chr1_1158624_1159348_-	hsa_circ_0000002	725	251	cd_19, K562, Huvec, Hsmm, Hepg2, Helas3, H1hesc, Gm12878, Bj, Ag04450, A549, Sknshra, Mcf7	None	ANNOTATED, CDS, coding, INTERNAL	NM_016176	SDF4	Memczak2013, Salzman2013
chrX_106390973_106396733_-	hsa_circ_0091288	5761	252	K562, H1hesc	NA	ANNOTATED, CDS, coding, INTERNAL, OVCODE, OVEXON, UTR3	NM_017681	NUP62CL	Salzman2013
chr5_139819704_139825560_+	hsa_circ_0001540	5857	530	HEK293, cd_19, Hs68_RNase, Hs68_control, K562, H1hesc, Gm12878, Bj, Ag04450, Nhek, Sknshra	None	ANNOTATED, CDS, coding, INTERNAL, OVCODE, OVEXON	NM_017747	ANKHD1	Jeck2013, Memczak2013, Salzman2013
chrX_130883334_130928494_-	hsa_circ_0001944	45161	1096	HEK293, cd_19, cd_34, K562, Helas3, Gm12878	SINE	ANNOTATED, INTERNAL, ncRNA	TCONS_l2_00030860	TCONS_l2_00030860	Memczak2013, Salzman2013
chr17_27778473_27794234_+	hsa_circ_0008866	15762	298	Hs68_RNase, Hs68_control, K562, Gm12878, Bj, Ag04450, A549	None	ANNOTATED, CDS, coding, INTERNAL, OVCODE, OVEXON, UTR5	NM_020791	TAOK1	Jeck2013, Salzman2013
chr7_6474393_6476164_-	hsa_circ_0079368	1772	431	Nhek, K562, Hsmm, Ag04450	NA	ANNOTATED, CDS, coding, INTERNAL, OVCODE, OVEXON	NM_139179	DAGLB	Salzman2013
chr7_6461358_6465745_-	hsa_circ_0079355	4388	289	K562, A549, Sknshra	NA	ANNOTATED, CDS, coding, INTERNAL, OVCODE, OVEXON	NM_139179	DAGLB	Salzman2013
chr18_12999420_13008630_+	hsa_circ_0000830	9211	470	cd_34, Hs68_RNase, Hs68_control, K562, Hepg2, Helas3, H1hesc, Gm12878, Bj, Ag04450	None	ANNOTATED, CDS, coding, INTERNAL, OVCODE, OVEXON, UTR5	NM_032142	CEP192	Jeck2013, Memczak2013, Salzman2013
chr11_126275991_126279306_+	hsa_circ_0024824	3316	819	K562, Helas3, H1hesc, Bj, Ag04450, A549, Nhek, Sknshra, Mcf7	NA	ANNOTATED, CDS, coding, INTERNAL, OVCODE, OVEXON, UTR5	NM_006278	ST3GAL4	Salzman2013
chr13_47297356_47308133_+	hsa_circ_0002215	10778	326	Hs68_RNase, Hs68_control, Nhek, K562, Hsmm, Hepg2, Helas3, Gm12878, Bj, Ag04450, A549, Sknshra, Mcf7	None	ANNOTATED, CDS, coding, INTERNAL, OVCODE, OVEXON	NM_001164211	LRCH1	Jeck2013, Salzman2013
chr12_133245397_133248908_-	hsa_circ_0029531	3512	237	Nhek, K562, Huvec, Hepg2, Helas3, Gm12878, Ag04450, A549, Sknshra, Mcf7	NA	ANNOTATED, CDS, coding, INTERNAL, OVCODE, OVEXON	NM_006231	POLE	Salzman2013
chr11_77090286_77091039_-	hsa_circ_0008992	754	249	Hs68_RNase, Hs68_control, Gm12878, Nhek	None	ANNOTATED, CDS, coding, INTERNAL, OVCODE, OVEXON	NM_001128620	PAK1	Jeck2013, Salzman2013
chr15_36936479_36950106_+	hsa_circ_0034398	13628	245	K562, Huvec, Hepg2, Helas3, H1hesc, Gm12878, Bj, Ag04450, Sknshra, Mcf7	NA	ANNOTATED, CDS, coding, INTERNAL, OVCODE, OVERLAPTX, OVEXON, UTR5	NM_032499	C15orf41	Salzman2013
chr1_65278421_65280523_+	hsa_circ_0012860	2103	249	Hepg2, Helas3, H1hesc, A549, Mcf7	NA	ANNOTATED, CDS, coding, INTERNAL, OVCODE, OVEXON	NM_018211	RAVER2	Salzman2013
chrX_53672263_53707139_-	hsa_circ_0002724	34877	666	Hs68_RNase, Hs68_control, K562, Helas3, H1hesc, Gm12878, Bj, A549	None	ANNOTATED, CDS, coding, INTERNAL, OVCODE, OVEXON, UTR5	NM_031407	HUWE1	Jeck2013, Salzman2013
chr14_75576388_75577074_-	hsa_circ_0000557	687	244	HEK293, cd_19, neutr, Hs68_RNase, Hs68_control, Nhek, K562, Huvec, Hepg2, Helas3, H1hesc, Gm12878, Bj, Ag04450, A549, Sknshra	None	ANNOTATED, CDS, coding, INTERNAL, OVCODE, OVEXON	NM_033116	NEK9	Jeck2013, Memczak2013, Salzman2013
chr6_17669206_17669777_-	hsa_circ_0002049	572	216	Hs68_RNase, Hs68_control, K562, Huvec, H1hesc, Gm12878, Ag04450, Nhek	None	ANNOTATED, CDS, coding, INTERNAL, OVCODE, OVEXON	NM_005124	NUP153	Jeck2013, Salzman2013
chr2_201721405_201721708_-	hsa_circ_0004001	304	225	Hs68_RNase, Hs68_control, Nhek, K562, Helas3, H1hesc, Gm12878, Sknshra	None	ANNOTATED, INTERNAL, ncRNA, OVCODE, OVEXON	NR_027856	CLK1	Jeck2013, Salzman2013
chr11_65061624_65063461_+	hsa_circ_0004291	1838	403	Hs68_RNase, Hs68_control, K562, Hepg2, Helas3, H1hesc, Gm12878, Bj, Ag04450, A549, Nhek	None	ANNOTATED, CDS, coding, INTERNAL, OVCODE, OVEXON	NM_002689	POLA2	Jeck2013, Salzman2013
chr17_11958206_11984847_+	hsa_circ_0007508	26642	278	Hs68_RNase, Hs68_control, Nhek, K562, Helas3, H1hesc, Gm12878, Bj, Ag04450	None	ANNOTATED, CDS, coding, INTERNAL, OVCODE, OVEXON	NM_003010	MAP2K4	Jeck2013, Salzman2013
chr19_4929234_4930888_+	hsa_circ_0048675	1655	416	Gm12878	NA	ANNOTATED, CDS, coding, INTERNAL, OVCODE, OVEXON	NM_013282	UHRF1	Salzman2013
chr7_98527612_98527829_+	hsa_circ_0081271	218	218	K562, Gm12878, Ag04450, Mcf7	NA	ANNOTATED, CDS, coding, INTERNAL, OVCODE, OVEXON	NM_001244580	TRRAP	Salzman2013
chr17_1264386_1265302_-	hsa_circ_0007643	917	314	Hs68_RNase, Hs68_control, Nhek, K562, Huvec, Hepg2, Helas3, H1hesc, Gm12878, Bj, Ag04450, A549, Sknshra, Mcf7	None	ANNOTATED, INTERNAL, ncRNA, OVCODE, OVEXON	NR_024058	YWHAE	Jeck2013, Salzman2013
chr2_242346952_242352836_+	hsa_circ_0059074	5885	292	Nhek, K562, Huvec, Hepg2, Helas3, H1hesc, Gm12878, Bj, Ag04450, A549	NA	ANNOTATED, CDS, coding, INTERNAL, OVCODE, OVEXON	NM_014808	FARP2	Salzman2013
chr16_16101673_16110478_+	hsa_circ_0000676	8806	567	cd_19, Hs68_RNase, Hs68_control, K562, Huvec, Hepg2, Helas3, H1hesc, Gm12878, Bj, Ag04450, A549, Mcf7	None	ANNOTATED, CDS, coding, INTERNAL, OVCODE, OVEXON	NM_019899	ABCC1	Jeck2013, Memczak2013, Salzman2013
chr12_4626227_4628046_-	hsa_circ_0008684	1820	434	Hs68_RNase, Hs68_control, K562	None	ANNOTATED, CDS, coding, INTERNAL, OVCODE, OVEXON	NM_020374	C12orf4	Jeck2013, Salzman2013
chr2_70451686_70457986_-	hsa_circ_0002199	6301	351	Hs68_RNase, Hs68_control, K562, H1hesc	None	ANNOTATED, CDS, coding, INTERNAL, OVCODE, OVEXON	NM_022173	TIA1	Jeck2013, Salzman2013
chr5_109049221_109065214_+	hsa_circ_0001519	15994	572	cd_19, cd_34, Hs68_RNase, Hs68_control	None	ANNOTATED, CDS, coding, INTERNAL, OVCODE, OVEXON	NM_002372	MAN2A1	Jeck2013, Memczak2013
chr20_18491466_18492926_+	hsa_circ_0002176	1461	293	Hs68_RNase, Hs68_control, Helas3, A549	None	ANNOTATED, CDS, coding, INTERNAL, OVCODE, OVEXON, UTR5	NM_032985	SEC23B	Jeck2013, Salzman2013
chr3_15455528_15457449_-	hsa_circ_0008277	1922	313	Hs68_RNase, Hs68_control	None	ANNOTATED, CDS, coding, INTERNAL, OVCODE, OVEXON	NM_152396	METTL6	Jeck2013
chr6_47251674_47254331_-	hsa_circ_0001610	2658	1147	HEK293, cd_19, Hs68_RNase, Hs68_control	None	ANNOTATED, CDS, coding, INTERNAL, OVCODE, OVEXON	NM_014452	TNFRSF21	Jeck2013, Memczak2013
chr1_41474466_41475261_+	hsa_circ_0005157	796	242	Hs68_RNase, Hs68_control, Bj, Ag04450, A549	None	ANNOTATED, CDS, coding, INTERNAL, OVCODE, OVEXON	NM_001905	CTPS	Jeck2013, Salzman2013
chr3_128348794_128351000_-	hsa_circ_0003404	2207	403	Hs68_RNase, Hs68_control, Gm12878, Bj	None	ANNOTATED, CDS, coding, INTERNAL, OVCODE, OVEXON	NM_002950	RPN1	Jeck2013, Salzman2013
chr1_63042933_63052295_-	hsa_circ_0002032	9363	430	Hs68_RNase, Hs68_control, Nhek, Helas3, Bj, Ag04450, A549	None	ANNOTATED, CDS, coding, INTERNAL, OVCODE, OVEXON	NM_033407	DOCK7	Jeck2013, Salzman2013
chr12_32760891_32764217_+	hsa_circ_0000390	3327	345	cd_19, neutr, H1hesc	None	ANNOTATED, CDS, coding, INTERNAL	NM_139241	FGD4	Memczak2013, Salzman2013
chr3_47747899_47755980_-	hsa_circ_0065292	8082	324	K562	NA	ANNOTATED, CDS, coding, INTERNAL, OVCODE, OVEXON	NM_003074	SMARCC1	Salzman2013
chr2_240274373_240274613_-	hsa_circ_0058913	241	241	K562, Hepg2, Helas3, H1hesc, A549	NA	ANNOTATED, CDS, coding, INTERNAL, OVCODE, OVEXON, UTR5	NM_006037	HDAC4	Salzman2013
chr17_18607932_18608477_+	hsa_circ_0002896	546	546	Hs68_RNase, Hs68_control, Nhek, K562, Helas3, H1hesc, Gm12878, Bj, Ag04450, A549, Sknshra	None	INTERGENIC	None	None	Jeck2013, Salzman2013
chr1_25124233_25153607_+	hsa_circ_0005609	29375	343	Hs68_RNase, Hs68_control	None	ANNOTATED, CDS, coding, INTERNAL, OVCODE, OVEXON	NM_013943	CLIC4	Jeck2013
chr15_67004006_67009478_+	hsa_circ_0036006	5473	267	Hepg2, Helas3, Sknshra	NA	ANNOTATED, INTERNAL, ncRNA, OVCODE, OVEXON	NR_027654	SMAD6	Salzman2013
chr1_78324623_78327007_+	hsa_circ_0000088	2385	378	cd_19, Hs68_RNase, Hs68_control	None	ANNOTATED, CDS, coding, INTERNAL, OVCODE, OVEXON	NM_198549	FAM73A	Jeck2013, Memczak2013
chr6_151277131_151293194_+	hsa_circ_0006715	16064	399	Hs68_RNase, Hs68_control, K562, A549	None	ANNOTATED, CDS, coding, INTERNAL, OVCODE, OVEXON	NM_001242767	MTHFD1L	Jeck2013, Salzman2013
chr9_90313571_90315152_+	hsa_circ_0087421	1582	260	K562, Hepg2, H1hesc, Gm12878	NA	ANNOTATED, CDS, coding, INTERNAL, OVCODE, OVEXON	NM_004938	DAPK1	Salzman2013
chr5_73045662_73049027_+	hsa_circ_0072992	3366	442	Huvec, Ag04450, Nhek	NA	ANNOTATED, CDS, coding, INTERNAL, OVCODE, OVEXON	NM_001080479	RGNEF	Salzman2013
chr8_143425327_143427253_-	hsa_circ_0006060	1927	657	Hs68_RNase, Hs68_control, Nhek, Hepg2, Helas3, H1hesc, Gm12878, Bj	None	ANNOTATED, CDS, coding, INTERNAL, OVCODE, OVEXON	NM_145003	TSNARE1	Jeck2013, Salzman2013
chr1_44773982_44818597_-	hsa_circ_0012145	44616	623	K562, Hepg2, Helas3, H1hesc, A549	NA	ANNOTATED, CDS, coding, INTERNAL, OVCODE, OVERLAPTX, OVEXON	NM_024066	ERI3	Salzman2013
chr1_173961893_173962273_-	hsa_circ_0004927	381	381	Hs68_RNase, Hs68_control	None	ALT_ACCEPTOR, CDS, coding, OVCODE, OVEXON, upstream_start, UTR5	NM_172071	RC3H1	Jeck2013
chr1_233296029_233314921_-	hsa_circ_0016960	18893	451	H1hesc, Gm12878	NA	ANNOTATED, CDS, coding, INTERNAL, OVCODE, OVEXON	NM_014801	PCNXL2	Salzman2013
chr7_43436413_43447330_+	hsa_circ_0008258	10918	246	Hs68_RNase, Hs68_control, Ag04450, A549	None	ANNOTATED, CDS, coding, INTERNAL, OVCODE, OVEXON	NM_015052	HECW1	Jeck2013, Salzman2013
chr12_117365828_117402659_+	hsa_circ_0003677	36832	517	Hs68_RNase, Hs68_control, K562, Huvec, H1hesc, Gm12878, Bj, Ag04450, A549, Sknshra	None	ANNOTATED, CDS, coding, INTERNAL, OVCODE, OVEXON	NM_153348	FBXW8	Jeck2013, Salzman2013
chr20_54956489_54961589_-	hsa_circ_0008777	5101	663	Hs68_RNase, Hs68_control, K562, Huvec, Hepg2, Helas3, Gm12878, Ag04450, A549	None	ANNOTATED, CDS, coding, INTERNAL, OVCODE, OVEXON	NM_198433	AURKA	Jeck2013, Salzman2013
chr2_215632206_215646233_-	hsa_circ_0001098	14028	1204	HEK293, cd_19, Nhek, K562, Huvec, Hepg2, Helas3, H1hesc, Gm12878, Bj, Ag04450, A549, Sknshra, Mcf7	None	ANNOTATED, CDS, coding, INTERNAL	NM_000465	BARD1	Memczak2013, Salzman2013
chr10_124151819_124184475_+	hsa_circ_0020264	32657	900	Hepg2	LINE	ANNOTATED, CDS, coding, INTERNAL, OVCODE, OVERLAPTX, OVEXON, UTR5	NM_001195608	PLEKHA1	Salzman2013
chr5_176671196_176675325_+	hsa_circ_0004473	4130	339	Hs68_RNase, Hs68_control, Bj, A549, Sknshra	None	ANNOTATED, CDS, coding, INTERNAL, OVCODE, OVEXON	NM_022455	NSD1	Jeck2013, Salzman2013
chr14_31775938_31778388_-	hsa_circ_0008079	2451	525	Hs68_RNase, Hs68_control, Sknshra	None	ANNOTATED, CDS, coding, INTERNAL, OVCODE, OVEXON	NM_015473	HEATR5A	Jeck2013, Salzman2013
chr3_138289160_138291774_-	hsa_circ_0004524	2615	470	Hs68_RNase, Hs68_control, Nhek, Helas3, Ag04450, A549	None	ANNOTATED, CDS, coding, INTERNAL, OVCODE, OVEXON, UTR5	NM_024491	CEP70	Jeck2013, Salzman2013
chr9_20881870_20916936_+	hsa_circ_0005426	35067	535	Hs68_RNase, Hs68_control	None	ANNOTATED, CDS, coding, INTERNAL, OVCODE, OVEXON	NM_017794	KIAA1797	Jeck2013
chr14_103470265_103478525_-	hsa_circ_0000571	8261	272	HEK293, Hs68_RNase, Hs68_control	None	ANNOTATED, CDS, coding, INTERNAL, OVCODE, OVEXON	NM_006035	CDC42BPB	Jeck2013, Memczak2013
chr14_76633006_76662315_+	hsa_circ_0005252	29310	626	Hs68_RNase, Hs68_control, Nhek, K562, Hepg2, Helas3, H1hesc, Gm12878, Bj, Ag04450, A549, Sknshra, Mcf7	None	ANNOTATED, CDS, coding, INTERNAL, OVCODE, OVEXON	NM_017926	C14orf118	Jeck2013, Salzman2013
chr9_138741983_138754454_-	hsa_circ_0089487	12472	379	K562, H1hesc, Gm12878, Bj, Ag04450, A549, Nhek, Sknshra, Mcf7	NA	ANNOTATED, CDS, coding, INTERNAL, OVCODE, OVEXON	NM_015447	CAMSAP1	Salzman2013
chr2_171902684_171906684_-	hsa_circ_0004813	4001	437	Hs68_RNase, Hs68_control, K562, Ag04450, A549	None	ANNOTATED, CDS, coding, INTERNAL, OVCODE, OVEXON	NM_012290	TLK1	Jeck2013, Salzman2013
chr16_3900298_3901010_-	hsa_circ_0007637	713	713	Hs68_RNase, Hs68_control, Nhek, K562, Huvec, Hepg2, Helas3, H1hesc, Gm12878, Bj, Ag04450, A549, Sknshra, Mcf7	None	ANNOTATED, CDS, coding, INTERNAL, OVCODE, OVEXON	NM_004380	CREBBP	Jeck2013, Salzman2013
chr13_113669077_113679072_+	hsa_circ_0030973	9996	199	Hepg2	NA	ANNOTATED, CDS, coding, INTERNAL, OVCODE, OVEXON	NM_024979	MCF2L	Salzman2013
chr15_65799581_65804902_-	hsa_circ_0006487	5322	383	Hs68_RNase, Hs68_control, Huvec, Hepg2, H1hesc, Gm12878	None	ANNOTATED, CDS, coding, INTERNAL, OVCODE, OVEXON, UTR5	NM_130434	DPP8	Jeck2013, Salzman2013
chr19_34887206_34887562_+	hsa_circ_0008033	357	207	Hs68_RNase, Hs68_control, K562, Helas3, H1hesc, Gm12878, Bj, Ag04450, A549, Nhek, Sknshra	None	ANNOTATED, CDS, coding, INTERNAL, OVCODE, OVEXON	NM_001184722	GPI	Jeck2013, Salzman2013
chr8_48196617_48206619_+	hsa_circ_0002157	10003	336	Hs68_RNase, Hs68_control, K562, Hepg2, Gm12878, Bj, Ag04450, Sknshra, Mcf7	None	ANNOTATED, CDS, coding, INTERNAL, OVCODE, OVEXON	NM_001080394	KIAA0146	Jeck2013, Salzman2013
chr16_66655965_66670484_-	hsa_circ_0009167	14520	437	Hs68_RNase, Hs68_control	None	ANNOTATED, CDS, coding, INTERNAL, OVCODE, OVEXON	NM_178818	CMTM4	Jeck2013
chr1_32502511_32504220_+	hsa_circ_0007231	1710	404	Hs68_RNase, Hs68_control, K562, Hepg2, Helas3, H1hesc, Gm12878, Ag04450, Sknshra, Mcf7	None	ANNOTATED, CDS, coding, INTERNAL, OVCODE, OVEXON	NM_006559	KHDRBS1	Jeck2013, Salzman2013
chr15_62299507_62306191_-	hsa_circ_0000607	6685	606	HEK293, cd_19, Hs68_RNase, Hs68_control, K562, Huvec, Helas3, Gm12878, Ag04450, Sknshra	None	ANNOTATED, CDS, coding, INTERNAL, OVCODE, OVEXON	NM_020821	VPS13C	Jeck2013, Memczak2013, Salzman2013
chr6_126332399_126334247_+	hsa_circ_0077795	1849	379	Ag04450	NA	ANNOTATED, CDS, coding, INTERNAL, OVCODE, OVEXON	NM_001031712	TRMT11	Salzman2013
chrX_14814282_14815420_-	hsa_circ_0002777	1139	1139	Hs68_RNase, Hs68_control	LTR	INTERGENIC	None	None	Jeck2013
chr19_5071021_5082515_+	hsa_circ_0048704	11495	292	K562, Hepg2, Helas3, Gm12878, Bj, Ag04450, Sknshra	NA	ANNOTATED, CDS, coding, INTERNAL, OVCODE, OVERLAPTX, OVEXON	NM_015015	KDM4B	Salzman2013
chr10_5836848_5842668_-	hsa_circ_0002665	5821	343	Hs68_RNase, Hs68_control, Nhek, K562, H1hesc, Gm12878, Bj, Ag04450, A549, Sknshra, Mcf7	None	ANNOTATED, CDS, coding, INTERNAL, OVCODE, OVEXON	NM_001494	GDI2	Jeck2013, Salzman2013
chr12_51467606_51467865_-	hsa_circ_0004538	260	260	Hs68_RNase, Hs68_control, K562, Hepg2, H1hesc, Gm12878, Bj, Ag04450, Sknshra, Mcf7	None	ANNOTATED, INTERNAL, ncRNA, OVCODE, OVEXON	NR_045072	CSRNP2	Jeck2013, Salzman2013
chr17_489510_505136_-	hsa_circ_0041164	15627	197	K562, Sknshra	NA	ANNOTATED, CDS, coding, INTERNAL, OVCODE, OVERLAPTX, OVEXON	NM_001128159	VPS53	Salzman2013
chr7_129821463_129832663_-	hsa_circ_0082352	11201	547	K562, Helas3, H1hesc, Gm12878, Bj, A549, Sknshra	NA	ANNOTATED, CDS, coding, INTERNAL, OVCODE, OVERLAPTX, OVEXON	NM_032842	TMEM209	Salzman2013
chr5_138145727_138163407_+	hsa_circ_0007440	17681	761	Hs68_RNase, Hs68_control, Hsmm, Hmec, Hepg2, Helas3, H1hesc, Gm12878, Bj, Ag04450, A549, Nhek, Nhlf	None	ANNOTATED, CDS, coding, INTERNAL, OVCODE, OVEXON	NM_001903	CTNNA1	Jeck2013, Salzman2013
chr1_198201683_198233365_+	hsa_circ_0002528	31683	400	Hs68_RNase, Hs68_control, K562, Bj, Ag04450	None	ANNOTATED, CDS, coding, INTERNAL, OVCODE, OVEXON, UTR5	NM_133494	NEK7	Jeck2013, Salzman2013
chr10_128768966_128788867_+	hsa_circ_0007142	19902	427	Hs68_RNase, Hs68_control, Nhek, Huvec, Hepg2, Helas3, H1hesc, Ag04450, Sknshra	None	ANNOTATED, CDS, coding, INTERNAL, OVCODE, OVEXON	NM_001380	DOCK1	Jeck2013, Salzman2013
chr8_68007528_68007967_+	hsa_circ_0084665	440	440	K562	NA	ANNOTATED, CDS, coding, INTERNAL, OVCODE, OVEXON	NM_024790	CSPP1	Salzman2013
chr15_43690236_43694048_+	hsa_circ_0034970	3813	455	Nhek, K562, Huvec, Hepg2, Helas3, H1hesc, Gm12878, Sknshra	NA	ALT_ACCEPTOR, CDS, coding, INTERNAL, intronic, OVCODE, OVEXON	NM_014444	TUBGCP4	Salzman2013
chr9_37819285_37842283_+	hsa_circ_0087084	22999	312	Huvec, Ag04450, Sknshra	NA	ANNOTATED, CDS, coding, INTERNAL, OVCODE, OVERLAPTX, OVEXON	NM_024345	DCAF10	Salzman2013
chr9_86294690_86301070_-	hsa_circ_0008207	6381	531	Hs68_RNase, Hs68_control, K562, H1hesc, Gm12878, Ag04450	None	ANNOTATED, CDS, coding, INTERNAL, OVCODE, OVEXON	NM_013438	UBQLN1	Jeck2013, Salzman2013
chr9_110062422_110074018_+	hsa_circ_0008812	11597	487	Hs68_RNase, Hs68_control, K562, Helas3, H1hesc, Gm12878, Bj, Ag04450, A549, Nhek, Sknshra	None	ANNOTATED, CDS, coding, INTERNAL, OVCODE, OVEXON	NM_002874	RAD23B	Jeck2013, Salzman2013
chr16_68155890_68160513_+	hsa_circ_0000711	4624	1298	HEK293, cd_19, cd_34, neutr, Hs68_RNase, Hs68_control, Nhek, K562, Huvec, Hsmm, Hmec, Hepg2, Helas3, H1hesc, Gm12878, Bj, Ag04450, A549, Nhlf, Sknshra, Mcf7	None	ANNOTATED, CDS, coding, INTERNAL, OVCODE, OVEXON	NM_173165	NFATC3	Jeck2013, Memczak2013, Salzman2013
chr2_160005653_160007067_+	hsa_circ_0004213	1415	318	Hs68_RNase, Hs68_control	None	ANNOTATED, CDS, coding, INTERNAL, OVCODE, OVEXON	NM_033394	TANC1	Jeck2013
chr7_135262544_135277940_+	hsa_circ_0001750	15397	1182	HEK293, Hs68_RNase, Hs68_control	None	ANNOTATED, CDS, coding, INTERNAL, OVCODE, OVEXON	NM_015135	NUP205	Jeck2013, Memczak2013
chr17_40497577_40500535_-	hsa_circ_0043815	2959	373	K562, Hepg2, Helas3, Gm12878, Ag04450, A549, Sknshra	NA	ANNOTATED, CDS, coding, INTERNAL, OVCODE, OVEXON, UTR5	NM_003150	STAT3	Salzman2013
chr10_126727566_126799662_-	hsa_circ_0005418	72097	263	Hs68_RNase, Hs68_control, Nhek, Huvec, Hsmm, Hepg2, Helas3, H1hesc, Bj, Ag04450, A549, Nhlf, Sknshra, Mcf7	None	ANNOTATED, CDS, coding, INTERNAL, OVCODE, OVEXON, UTR5	NM_001083914	CTBP2	Jeck2013, Salzman2013
chr15_51855578_51868378_-	hsa_circ_0035285	12801	480	K562, A549	NA	ANNOTATED, CDS, coding, INTERNAL, OVCODE, OVEXON	NM_001174116	DMXL2	Salzman2013
chr19_10602253_10602938_-	hsa_circ_0006149	686	686	Hs68_RNase, Hs68_control, Huvec, Hepg2, Helas3, Gm12878, Bj, Ag04450, Nhek, Sknshra, Mcf7	None	ANNOTATED, CDS, coding, INTERNAL, OVCODE, OVEXON	NM_203500	KEAP1	Jeck2013, Salzman2013
chr2_201784945_201802689_-	hsa_circ_0006101	17745	1013	Hs68_RNase, Hs68_control	None	ANNOTATED, INTERNAL, ncRNA, OVCODE, OVEXON	NR_033915	ORC2	Jeck2013
chr7_75066793_75068502_-	hsa_circ_0080689	1710	253	Nhek, K562, Huvec, Hepg2, Helas3, H1hesc, Bj, Ag04450, A549, Sknshra	NA	ANNOTATED, CDS, coding, INTERNAL, OVCODE, OVEXON	NM_001099415	POM121C	Salzman2013
chr5_10213603_10224173_-	hsa_circ_0002753	10571	10571	Hs68_RNase, Hs68_control	LTR	INTERGENIC	None	None	Jeck2013
chr1_46193303_46195441_-	hsa_circ_0012275	2139	324	Gm12878, Ag04450	NA	ANNOTATED, CDS, coding, INTERNAL, OVCODE, OVEXON	NM_005897	IPP	Salzman2013
chr20_62630398_62631112_+	hsa_circ_0061205	715	252	K562, H1hesc, A549	NA	ANNOTATED, CDS, coding, INTERNAL, OVCODE, OVERLAPTX, OVEXON	NM_012469	PRPF6	Salzman2013
chr12_125587225_125591814_+	hsa_circ_0006078	4590	345	Hs68_RNase, Hs68_control, Nhek, Hepg2, Helas3, H1hesc, Gm12878, Bj, A549	None	ANNOTATED, CDS, coding, INTERNAL, OVCODE, OVEXON	NM_023928	AACS	Jeck2013, Salzman2013
chr6_26426470_26429013_+	hsa_circ_0075891	2544	662	Helas3, Ag04450, A549, Nhek, Sknshra	NA	ANNOTATED, INTERNAL, ncRNA, OVEXON	NR_027795	BTN2A3P	Salzman2013
chr15_89656956_89659752_+	hsa_circ_0007099	2797	300	Hs68_RNase, Hs68_control, Nhek, K562, Huvec, Hsmm, Hepg2, Helas3, H1hesc, Gm12878, Bj, Ag04450, A549, Nhlf, Sknshra, Mcf7	None	ANNOTATED, CDS, coding, INTERNAL, OVCODE, OVEXON, UTR5	NM_007011	ABHD2	Jeck2013, Salzman2013
chr8_48706851_48710958_-	hsa_circ_0084276	4108	373	H1hesc	NA	ANNOTATED, CDS, coding, INTERNAL, OVCODE, OVEXON	NM_006904	PRKDC	Salzman2013
chr4_170501993_170511960_-	hsa_circ_0071434	9968	556	K562, Gm12878, Bj, Sknshra	NA	ANNOTATED, CDS, coding, INTERNAL, OVCODE, OVEXON	NM_001199397	NEK1	Salzman2013
chr15_64404772_64415745_+	hsa_circ_0002178	10974	351	Hs68_RNase, Hs68_control	None	ANNOTATED, CDS, coding, INTERNAL, OVCODE, OVEXON	NM_003099	SNX1	Jeck2013
chr17_5314023_5320002_-	hsa_circ_0000739	5980	383	cd_19, neutr, Hepg2, Helas3, Gm12878	None	ANNOTATED, CDS, coding, INTERNAL	NM_002532	NUP88	Memczak2013, Salzman2013
chr9_130230019_130236210_+	hsa_circ_0088661	6192	222	Hepg2, Ag04450, A549, Sknshra	NA	ANNOTATED, CDS, coding, INTERNAL, OVCODE, OVEXON	NM_138361	LRSAM1	Salzman2013
chr17_62248460_62265775_-	hsa_circ_0004913	17316	495	Hs68_RNase, Hs68_control, Nhek, K562, Huvec, Hepg2, Helas3, H1hesc, Gm12878, Bj, Ag04450, A549, Sknshra, Mcf7	None	ALT_ACCEPTOR, CDS, coding, INTERNAL, OVCODE, OVEXON	NM_018469	TEX2	Jeck2013, Salzman2013
chr3_15776917_15778740_-	hsa_circ_0007728	1824	289	Hs68_RNase, Hs68_control, K562, Hepg2, H1hesc, Gm12878	None	ANNOTATED, CDS, coding, INTERNAL, OVCODE, OVEXON, UTR5	NM_001195098	ANKRD28	Jeck2013, Salzman2013
chr3_48572945_48577204_-	hsa_circ_0065390	4260	609	Nhek, K562, H1hesc, Bj, A549	NA	ANNOTATED, CDS, coding, INTERNAL, OVCODE, OVERLAPTX, OVEXON	NM_004567	PFKFB4	Salzman2013
chr2_205526532_205551005_+	hsa_circ_0006219	24474	24474	Hs68_RNase, Hs68_control	DNA	ALT_ACCEPTOR, CDS, coding, INTERNAL, intronic, OVCODE, OVEXON	NM_152526	PARD3B	Jeck2013
chr1_156286957_156287338_-	hsa_circ_0000142	382	215	cd_19, K562, Hepg2, Gm12878, Ag04450, A549, Sknshra, Mcf7	None	ANNOTATED, CDS, coding, INTERNAL	NM_001008800	CCT3	Memczak2013, Salzman2013
chr11_18305342_18307006_-	hsa_circ_0007484	1665	221	Hs68_RNase, Hs68_control, K562, Huvec, Hepg2, Helas3, Gm12878, Bj, Ag04450, A549, Nhek	None	ANNOTATED, CDS, coding, INTERNAL, OVCODE, OVEXON	NM_181507	HPS5	Jeck2013, Salzman2013
chr11_77823696_77832220_-	hsa_circ_0003615	8525	530	Hs68_RNase, Hs68_control, K562	None	ANNOTATED, CDS, coding, INTERNAL, OVCODE, OVEXON	NM_001007027	ALG8	Jeck2013, Salzman2013
chr7_65705312_65706257_+	hsa_circ_0007672	946	946	Hs68_RNase, Hs68_control	None	ANNOTATED, CDS, coding, INTERNAL, OVCODE, OVEXON, UTR5	NM_003596	TPST1	Jeck2013
chr11_103173822_103187349_+	hsa_circ_0006864	13528	630	Hs68_RNase, Hs68_control	None	ANNOTATED, CDS, coding, INTERNAL, OVCODE, OVEXON	NM_001080463	DYNC2H1	Jeck2013
chr5_37342651_37350367_-	hsa_circ_0072271	7717	370	K562, Gm12878, Sknshra	NA	ANNOTATED, CDS, coding, INTERNAL, OVCODE, OVEXON	NM_153485	NUP155	Salzman2013
chr14_39620950_39628754_-	hsa_circ_0031738	7805	364	K562, Gm12878, Ag04450, A549	NA	ANNOTATED, CDS, coding, INTERNAL, OVCODE, OVEXON	NM_001079537	TRAPPC6B	Salzman2013
chr3_11850991_11871338_-	hsa_circ_0002074	20348	463	Hs68_RNase, Hs68_control, Nhek, K562, Gm12878, Bj, Sknshra	None	ANNOTATED, CDS, coding, INTERNAL, OVCODE, OVEXON	NM_138807	TAMM41	Jeck2013, Salzman2013
chr6_45399600_45480144_+	hsa_circ_0076687	80545	598	Sknshra	NA	ANNOTATED, CDS, coding, INTERNAL, OVCODE, OVERLAPTX, OVEXON	NM_004348	RUNX2	Salzman2013
chr3_33106955_33114205_-	hsa_circ_0064716	7251	477	K562, Hepg2, Helas3, H1hesc, Gm12878	NA	ANNOTATED, CDS, coding, INTERNAL, OVCODE, OVEXON	NM_000404	GLB1	Salzman2013
chr3_33877536_33879819_+	hsa_circ_0064802	2284	347	Nhek, K562, H1hesc, Gm12878, Bj, Ag04450, Sknshra	NA	ANNOTATED, CDS, coding, INTERNAL, OVCODE, OVEXON	NM_001162429	PDCD6IP	Salzman2013
chr18_8076453_8088849_+	hsa_circ_0006114	12397	415	Hs68_RNase, Hs68_control, Hepg2, Helas3, Bj, Ag04450, A549	None	ANNOTATED, CDS, coding, INTERNAL, OVCODE, OVEXON	NM_001105244	PTPRM	Jeck2013, Salzman2013
chr4_140058784_140060651_-	hsa_circ_0007466	1868	323	Hs68_RNase, Hs68_control	None	ALT_ACCEPTOR, CDS, coding, OVCODE, OVEXON, upstream_start, UTR5	NM_201999	ELF2	Jeck2013
chr2_61722590_61726048_-	hsa_circ_0054886	3459	457	K562, Gm12878	NA	ANNOTATED, CDS, coding, INTERNAL, OVCODE, OVEXON	NM_003400	XPO1	Salzman2013
chr10_75506388_75506762_+	hsa_circ_0004387	375	287	Hs68_RNase, Hs68_control	None	ANNOTATED, CDS, coding, INTERNAL, OVCODE, OVEXON, UTR5	NM_004922	SEC24C	Jeck2013
chr7_131058469_131084192_+	hsa_circ_0003551	25724	2319	Hs68_RNase, Hs68_control	LINE	ALT_ACCEPTOR, CDS, coding, INTERNAL, intronic, OVCODE, OVEXON	NM_001145354	MKLN1	Jeck2013
chr8_48320423_48353104_+	hsa_circ_0002003	32682	321	Hs68_RNase, Hs68_control, K562, Hepg2, H1hesc, Gm12878, Bj, Ag04450, A549, Nhlf, Sknshra, Mcf7	None	ANNOTATED, CDS, coding, INTERNAL, OVCODE, OVEXON	NM_001080394	KIAA0146	Jeck2013, Salzman2013
chr14_78043110_78045452_-	hsa_circ_0002143	2343	304	Hs68_RNase, Hs68_control	None	ANNOTATED, CDS, coding, INTERNAL, OVCODE, OVEXON	NM_004863	SPTLC2	Jeck2013
chr8_22332467_22333137_+	hsa_circ_0083619	671	323	Nhek, K562, Huvec, Helas3, Gm12878, Bj, Ag04450, A549, Sknshra	NA	ANNOTATED, CDS, coding, INTERNAL, OVCODE, OVEXON	NM_001243974	PPP3CC	Salzman2013
chr1_56977648_57002784_-	hsa_circ_0009049	25137	671	Hs68_RNase, Hs68_control	None	ANNOTATED, CDS, coding, INTERNAL, OVCODE, OVEXON	NM_003713	PPAP2B	Jeck2013
chr20_5939174_5948671_+	hsa_circ_0059400	9498	633	K562	NA	ANNOTATED, CDS, coding, INTERNAL, OVCODE, OVEXON	NM_032485	MCM8	Salzman2013
chr11_68115315_68115711_+	hsa_circ_0023179	397	397	K562, Hepg2, Helas3, H1hesc, Gm12878, Mcf7	NA	ANNOTATED, CDS, coding, INTERNAL, OVCODE, OVEXON	NM_002335	LRP5	Salzman2013
chr1_176050288_176105683_-	hsa_circ_0003572	55396	446	Hs68_RNase, Hs68_control, K562, Hepg2, Helas3, H1hesc, Gm12878, Bj, Ag04450, A549, Sknshra	None	ANNOTATED, CDS, coding, INTERNAL, OVCODE, OVEXON	NM_022457	RFWD2	Jeck2013, Salzman2013
chr11_18536225_18537711_-	hsa_circ_0021464	1487	230	K562, Hepg2, H1hesc, Gm12878, Bj, Ag04450, A549, Nhek, Sknshra	NA	ANNOTATED, CDS, coding, INTERNAL, OVCODE, OVEXON	NM_006292	TSG101	Salzman2013
chr18_8113484_8143777_+	hsa_circ_0002872	30294	444	Hs68_RNase, Hs68_control	None	ANNOTATED, CDS, coding, INTERNAL, OVCODE, OVEXON	NM_001105244	PTPRM	Jeck2013
chr14_69908786_69922583_+	hsa_circ_0003226	13798	488	Hs68_RNase, Hs68_control, Gm12878, Ag04450	None	ANNOTATED, CDS, coding, INTERNAL, OVCODE, OVEXON	NM_018375	SLC39A9	Jeck2013, Salzman2013
chr15_25650608_25660989_-	hsa_circ_0005147	10382	4162	Hs68_RNase, Hs68_control	None	ALT_ACCEPTOR, CDS, coding, INTERNAL, intronic, OVCODE, OVEXON, UTR5	NM_000462	UBE3A	Jeck2013
chr20_35832288_35838568_+	hsa_circ_0060262	6281	507	Nhek, K562, Hepg2, Helas3, H1hesc, Gm12878, Bj, Ag04450, A549, Nhlf, Mcf7	NA	ANNOTATED, CDS, coding, INTERNAL, OVCODE, OVEXON	NM_002951	RPN2	Salzman2013
chr2_69581621_69590802_-	hsa_circ_0003808	9182	462	Hs68_RNase, Hs68_control, Nhek, H1hesc	None	ANNOTATED, CDS, coding, INTERNAL, OVCODE, OVEXON	NM_001244710	GFPT1	Jeck2013, Salzman2013
chr5_138614016_138615747_+	hsa_circ_0008595	1732	1090	Hs68_RNase, Hs68_control, K562, Hepg2, Helas3, H1hesc, Gm12878, Ag04450, A549, Nhek, Sknshra, Mcf7	DNA	ALT_DONOR, downstream_end, ncRNA, OVEXON	NR_003141	SNHG4	Jeck2013, Salzman2013
chr7_132959737_132973870_+	hsa_circ_0005923	14134	385	Hs68_RNase, Hs68_control, K562, H1hesc, Ag04450	None	ANNOTATED, CDS, coding, INTERNAL, OVCODE, OVEXON	NM_021807	EXOC4	Jeck2013, Salzman2013
chr5_56526673_56527148_+	hsa_circ_0001486	476	348	cd_34, neutr	None	ANNOTATED, CDS, coding, INTERNAL	NM_001127236	GPBP1	Memczak2013
chr2_240929491_240961757_-	hsa_circ_0058919	32267	924	K562, Hepg2, Helas3, Gm12878, Bj, A549, Sknshra	NA	ANNOTATED, CDS, coding, INTERNAL, OVCODE, OVEXON	NM_004544	NDUFA10	Salzman2013
chr2_120776653_120799686_+	hsa_circ_0056264	23034	293	K562, H1hesc, Gm12878, Sknshra	NA	ANNOTATED, CDS, coding, INTERNAL, OVCODE, OVEXON, UTR5	NM_020909	EPB41L5	Salzman2013
chr1_179100446_179102509_-	hsa_circ_0004996	2064	234	Hs68_RNase, Hs68_control, Nhek, K562, Huvec, Hsmm, Hmec, Helas3, H1hesc, Gm12878, Bj, Ag04450, A549, Sknshra, Mcf7	LINE	ANNOTATED, CDS, coding, INTERNAL, OVCODE, OVEXON	NM_007314	ABL2	Jeck2013, Salzman2013
chr16_68090267_68105011_+	hsa_circ_0039921	14745	502	K562, A549, Mcf7	NA	ANNOTATED, CDS, coding, INTERNAL, OVCODE, OVEXON	NM_017803	DUS2L	Salzman2013
chr8_117668095_117671219_-	hsa_circ_0005231	3125	418	Hs68_RNase, Hs68_control, K562, Hepg2, Helas3, Gm12878, A549	None	ANNOTATED, CDS, coding, INTERNAL, OVCODE, OVEXON	NM_003756	EIF3H	Jeck2013, Salzman2013
chr5_142264863_142311690_+	hsa_circ_0074362	46828	723	H1hesc, A549, Sknshra	NA	ANNOTATED, CDS, coding, INTERNAL, OVCODE, OVEXON	NM_015071	ARHGAP26	Salzman2013
chr6_150157221_150174296_-	hsa_circ_0003249	17076	639	Hs68_RNase, Hs68_control, K562, Hepg2, H1hesc, Bj, Ag04450, A549, Nhek, Sknshra, Mcf7	None	ANNOTATED, CDS, coding, INTERNAL, OVCODE, OVEXON	NM_032832	LRP11	Jeck2013, Salzman2013
chr15_41361768_41362745_-	hsa_circ_0007489	978	177	Hs68_RNase, Hs68_control, Nhek, K562, Huvec, Hmec, Hepg2, Helas3, H1hesc, Gm12878, Bj, Ag04450, A549, Sknshra, Mcf7	None	ANNOTATED, CDS, coding, INTERNAL, OVCODE, OVEXON	NM_017553	INO80	Jeck2013, Salzman2013
chr1_41578955_41608784_-	hsa_circ_0000063	29830	568	HEK293, cd_19, Hs68_RNase, Hs68_control, Nhek, K562, Huvec, Hepg2, Helas3, H1hesc, Gm12878, Bj, Ag04450, A549, Sknshra, Mcf7	None	ANNOTATED, CDS, coding, INTERNAL, OVCODE, OVEXON, UTR5	NM_001172219	SCMH1	Jeck2013, Memczak2013, Salzman2013
chr13_113158346_113181798_-	hsa_circ_0007031	23453	972	Hs68_RNase, Hs68_control, K562, Hepg2, Helas3, H1hesc, Gm12878, Ag04450, A549	None	ANNOTATED, CDS, coding, INTERNAL, OVCODE, OVEXON	NM_006322	TUBGCP3	Jeck2013, Salzman2013
chr8_70667659_70674110_-	hsa_circ_0001809	6452	351	neutr	None	ANNOTATED, CDS, coding, INTERNAL	NM_030958	SLCO5A1	Memczak2013
chr10_93902786_93904869_-	hsa_circ_0002435	2084	258	Hs68_RNase, Hs68_control, K562, Hepg2, Helas3, Gm12878, Bj, A549, Sknshra	None	ANNOTATED, CDS, coding, INTERNAL, OVCODE, OVEXON	NM_001178137	CPEB3	Jeck2013, Salzman2013
chr18_43702433_43703330_+	hsa_circ_0008333	898	190	Hs68_RNase, Hs68_control, Nhek, K562, Huvec, Hepg2, H1hesc, Gm12878, Ag04450, A549, Sknshra	None	ANNOTATED, INTERNAL, ncRNA, OVCODE, OVEXON	NR_026978	HAUS1	Jeck2013, Salzman2013
chr1_244715624_244724447_+	hsa_circ_0006080	8824	971	Hs68_RNase, Hs68_control, Hepg2, Helas3, H1hesc, Bj, A549, Mcf7	None	ANNOTATED, CDS, coding, INTERNAL, OVCODE, OVEXON	NM_001130957	C1orf101	Jeck2013, Salzman2013
chr5_172359439_172362313_+	hsa_circ_0004004	2875	224	Hs68_RNase, Hs68_control, K562, Huvec, Hepg2, Helas3, H1hesc, Gm12878, Bj, Ag04450, A549, Nhek	None	ANNOTATED, CDS, coding, INTERNAL, OVCODE, OVEXON	NM_001031711	ERGIC1	Jeck2013, Salzman2013
chr12_48490126_48495299_-	hsa_circ_0026029	5174	264	Gm12878	NA	ANNOTATED, CDS, coding, INTERNAL, OVCODE, OVEXON, UTR5	NM_014554	SENP1	Salzman2013
chr3_56703728_56707753_-	hsa_circ_0001316	4026	404	neutr, Hs68_RNase, Hs68_control, K562, Gm12878, Bj, Ag04450, Sknshra	None	ANNOTATED, CDS, coding, INTERNAL, OVCODE, OVEXON	NM_001112736	FAM208A	Jeck2013, Memczak2013, Salzman2013
chr19_5016268_5033042_+	hsa_circ_0048682	16775	249	K562, Hepg2, Helas3, Gm12878	NA	ANNOTATED, CDS, coding, INTERNAL, OVCODE, OVEXON, UTR5	NM_015015	KDM4B	Salzman2013
chr6_76412361_76412788_+	hsa_circ_0001614	428	428	cd_19, neutr, Hs68_RNase, Hs68_control, K562, H1hesc, Gm12878, Bj, Ag04450, A549, Sknshra	None	ANNOTATED, CDS, coding, INTERNAL, OVCODE, OVEXON	NM_001100409	SENP6	Jeck2013, Memczak2013, Salzman2013
chr9_37302185_37305711_+	hsa_circ_0087050	3527	341	K562, Helas3, Gm12878, Bj, Ag04450, A549, Sknshra, Mcf7	NA	ANNOTATED, CDS, coding, INTERNAL, OVCODE, OVEXON	NM_032226	ZCCHC7	Salzman2013
chr8_52773405_52773806_-	hsa_circ_0001801	402	402	HEK293, cd_19, cd_34, neutr, K562, Huvec, Hsmm, Hepg2, Helas3, H1hesc, Gm12878, Bj, Ag04450, A549, Sknshra, Mcf7	None	ANNOTATED, CDS, coding, INTERNAL, UTR5	NM_052937	PCMTD1	Memczak2013, Salzman2013
chr2_209209835_209212747_+	hsa_circ_0001097	2913	347	cd_19, Hs68_RNase, Hs68_control	None	ANNOTATED, CDS, coding, INTERNAL, OVCODE, OVEXON	NM_015040	PIKFYVE	Jeck2013, Memczak2013
chr5_31448654_31451747_-	hsa_circ_0004599	3094	308	Hs68_RNase, Hs68_control, K562, Huvec, Hsmm, Hepg2, Helas3, H1hesc, Gm12878, Bj, Ag04450, A549, Nhek, Sknshra, Mcf7	None	ANNOTATED, CDS, coding, INTERNAL, OVCODE, OVEXON	NM_013235	DROSHA	Jeck2013, Salzman2013
chr9_86292642_86301070_-	hsa_circ_0003715	8429	925	Hs68_RNase, Hs68_control, K562, Huvec, Hepg2, Helas3, H1hesc, Gm12878, Bj, Ag04450, A549, Nhek, Sknshra, Mcf7	None	ANNOTATED, CDS, coding, INTERNAL, OVCODE, OVEXON	NM_013438	UBQLN1	Jeck2013, Salzman2013
chr16_69729039_69729282_+	hsa_circ_0006845	244	244	Hs68_RNase, Hs68_control, Nhek, K562, Huvec, Hepg2, Helas3, H1hesc, Gm12878, Bj, Ag04450, A549, Sknshra	None	ANNOTATED, CDS, coding, INTERNAL, OVCODE, OVEXON, UTR3	NM_138714	NFAT5	Jeck2013, Salzman2013
chr1_94685814_94697199_-	hsa_circ_0003310	11386	372	Hs68_RNase, Hs68_control, Nhek, Huvec	None	ANNOTATED, CDS, coding, INTERNAL, OVCODE, OVEXON, UTR5	NM_004815	ARHGAP29	Jeck2013, Salzman2013
chr12_69109407_69121169_+	hsa_circ_0027477	11763	765	Nhek, K562, Hepg2, Ag04450	NA	ANNOTATED, CDS, coding, INTERNAL, OVCODE, OVEXON	NM_020401	NUP107	Salzman2013
chr11_10209896_10215534_-	hsa_circ_0006165	5639	5639	Hs68_RNase, Hs68_control	None	ALT_DONOR, CDS, coding, INTERNAL, intronic, OVCODE, OVEXON	NM_030962	SBF2	Jeck2013
chr10_7285520_7327916_-	hsa_circ_0017636	42397	684	Nhek, K562, Hepg2, Helas3, H1hesc, Gm12878, Bj, Ag04450, A549, Sknshra	NA	ANNOTATED, CDS, coding, INTERNAL, OVCODE, OVEXON	NM_001029880	SFMBT2	Salzman2013
chr17_16089868_16097953_-	hsa_circ_0005471	8086	312	Hs68_RNase, Hs68_control, K562, Hepg2, H1hesc, Gm12878, Bj, Ag04450, A549	None	ANNOTATED, CDS, coding, INTERNAL, OVCODE, OVEXON, UTR5	NM_006311	NCOR1	Jeck2013, Salzman2013
chr3_33648083_33686395_-	hsa_circ_0005324	38313	982	Hs68_RNase, Hs68_control, K562, Helas3	None	ANNOTATED, CDS, coding, INTERNAL, OVCODE, OVEXON	NM_015097	CLASP2	Jeck2013, Salzman2013
chr3_32479447_32483505_+	hsa_circ_0005414	4059	4059	Hs68_RNase, Hs68_control	None	ALT_ACCEPTOR, CDS, coding, INTERNAL, intronic, OVCODE, OVEXON	NM_138410	CMTM7	Jeck2013
chr17_49057107_49064598_-	hsa_circ_0000785	7492	596	cd_19, Hs68_RNase, Hs68_control, K562, Hepg2, Helas3, H1hesc, Gm12878, Ag04450, A549, Sknshra	None	ANNOTATED, CDS, coding, INTERNAL, OVCODE, OVEXON	NM_003971	SPAG9	Jeck2013, Memczak2013, Salzman2013
chr19_34706029_34706566_+	hsa_circ_0050463	538	243	K562, Huvec, Hsmm, Helas3, H1hesc, Gm12878, Ag04450, A549, Nhek, Sknshra	NA	ANNOTATED, CDS, coding, INTERNAL, OVCODE, OVEXON	NM_001114093	LSM14A	Salzman2013
chr18_12951854_12971250_+	hsa_circ_0003780	19397	509	Hs68_RNase, Hs68_control, K562, Helas3	None	ANNOTATED, CDS, coding, INTERNAL, OVCODE, OVEXON	NM_031216	SEH1L	Jeck2013, Salzman2013
chr14_100551024_100563995_+	hsa_circ_0033165	12972	347	K562, Hepg2, Helas3, H1hesc, Ag04450, A549, Sknshra	NA	ANNOTATED, CDS, coding, INTERNAL, OVCODE, OVEXON	NM_016337	EVL	Salzman2013
chr1_178252699_178269253_+	hsa_circ_0002846	16555	255	Hs68_RNase, Hs68_control, Nhek, Hsmm, Hepg2, Gm12878, Bj, Ag04450, A549, Sknshra	None	ANNOTATED, CDS, coding, INTERNAL, OVCODE, OVEXON	NM_170692	RASAL2	Jeck2013, Salzman2013
chr9_131882792_131885417_+	hsa_circ_0004727	2626	185	Hs68_RNase, Hs68_control, K562, Hepg2, Helas3, H1hesc, Gm12878, A549, Sknshra	None	ANNOTATED, CDS, coding, INTERNAL, OVCODE, OVEXON	NM_178001	PPP2R4	Jeck2013, Salzman2013
chr11_18305342_18308257_-	hsa_circ_0021424	2916	341	K562, H1hesc	NA	ANNOTATED, CDS, coding, INTERNAL, OVCODE, OVEXON	NM_181507	HPS5	Salzman2013
chr7_6085702_6089676_-	hsa_circ_0001673	3975	353	cd_34, Hs68_RNase, Hs68_control, K562, Bj, Sknshra	None	ANNOTATED, CDS, coding, INTERNAL, OVCODE, OVEXON	NM_014413	EIF2AK1	Jeck2013, Memczak2013, Salzman2013
chr4_107114766_107133992_-	hsa_circ_0070590	19227	285	K562, Huvec, Helas3, H1hesc, Gm12878, Bj, Ag04450, A549, Nhek, Sknshra	NA	ANNOTATED, CDS, coding, INTERNAL, OVCODE, OVERLAPTX, OVEXON	NM_001163435	TBCK	Salzman2013
chr13_20425495_20426330_-	hsa_circ_0002673	836	596	Hs68_RNase, Hs68_control, Gm12878	None	ANNOTATED, CDS, coding, INTERNAL, OVCODE, OVEXON, UTR5	NM_001142684	ZMYM5	Jeck2013, Salzman2013
chr2_201303845_201305507_+	hsa_circ_0057703	1663	343	K562, H1hesc, Bj, Ag04450, Sknshra	NA	ANNOTATED, CDS, coding, INTERNAL, OVCODE, OVEXON	NM_001100422	SPATS2L	Salzman2013
chr12_19406874_19410471_+	hsa_circ_0006657	3598	310	Hs68_RNase, Hs68_control, K562	None	ANNOTATED, CDS, coding, INTERNAL, OVCODE, OVEXON	NM_001143821	PLEKHA5	Jeck2013, Salzman2013
chr19_5047487_5082515_+	hsa_circ_0002926	35029	486	Hs68_RNase, Hs68_control, K562, Huvec, Hepg2, Helas3, H1hesc, Gm12878, Bj, Ag04450, A549, Nhek, Sknshra, Mcf7	None	ANNOTATED, CDS, coding, INTERNAL, OVCODE, OVEXON	NM_015015	KDM4B	Jeck2013, Salzman2013
chr6_35855801_35858790_-	hsa_circ_0076178	2990	316	Helas3	NA	ANNOTATED, CDS, coding, INTERNAL, OVCODE, OVEXON	NM_003137	SRPK1	Salzman2013
chr22_46493806_46505788_+	hsa_circ_0008668	11983	533	Hs68_RNase, Hs68_control	None	ALT_DONOR, INTERNAL, ncRNA, OVEXON	NR_027033	MIRLET7BHG	Jeck2013
chr13_28771322_28794515_+	hsa_circ_0006597	23194	310	Hs68_RNase, Hs68_control, K562, Huvec, Hepg2, Helas3, H1hesc, Gm12878, Ag04450, Sknshra	None	ANNOTATED, CDS, coding, INTERNAL, OVCODE, OVEXON	NM_175854	PAN3	Jeck2013, Salzman2013
chr9_134518626_134526336_-	hsa_circ_0089254	7711	433	K562, Huvec, Hepg2, Helas3, H1hesc, Gm12878, Bj, Ag04450, A549, Nhek, Mcf7	NA	ANNOTATED, CDS, coding, INTERNAL, OVCODE, OVEXON	NM_198679	RAPGEF1	Salzman2013
chr22_41531817_41536261_+	hsa_circ_0003184	4445	350	Hs68_RNase, Hs68_control	None	ANNOTATED, CDS, coding, INTERNAL, OVCODE, OVEXON	NM_001429	EP300	Jeck2013
chr19_55756488_55757046_-	hsa_circ_0005746	559	391	Hs68_RNase, Hs68_control, K562, Huvec, Hepg2, Helas3, H1hesc, Gm12878, Bj, Ag04450, A549, Nhek, Sknshra, Mcf7	None	ANNOTATED, CDS, coding, INTERNAL, OVCODE, OVEXON	NM_014931	PPP6R1	Jeck2013, Salzman2013
chr9_114332371_114348445_-	hsa_circ_0008043	16075	670	Hs68_RNase, Hs68_control, Bj, Ag04450, A549	None	ANNOTATED, CDS, coding, INTERNAL, OVCODE, OVERLAPTX, OVEXON	NM_001146108	PTGR1	Jeck2013, Salzman2013
chr15_60745802_60758912_-	hsa_circ_0035575	13111	717	K562	NA	ANNOTATED, CDS, coding, INTERNAL, OVCODE, OVEXON	NM_024611	NARG2	Salzman2013
chr9_114296019_114296633_+	hsa_circ_0001962	615	220	Hs68_RNase, Hs68_control	None	ANNOTATED, CDS, coding, INTERNAL, OVCODE, OVEXON	NM_133464	ZNF483	Jeck2013
chr5_80419461_80422982_+	hsa_circ_0008315	3522	216	Hs68_RNase, Hs68_control, Hepg2, Helas3, H1hesc, Bj, Ag04450, Nhlf	None	ANNOTATED, CDS, coding, INTERNAL, OVCODE, OVEXON	NM_006909	RASGRF2	Jeck2013, Salzman2013
chr10_103427643_103436193_-	hsa_circ_0008362	8551	510	Hs68_RNase, Hs68_control	None	ANNOTATED, CDS, coding, INTERNAL, OVCODE, OVEXON	NM_022039	FBXW4	Jeck2013
chr2_9490937_9508648_+	hsa_circ_0008768	17712	533	Hs68_RNase, Hs68_control, Nhek, K562, Huvec, Hepg2, Helas3, Bj, Ag04450, A549, Sknshra	None	ANNOTATED, CDS, coding, INTERNAL, OVCODE, OVEXON	NM_003887	ASAP2	Jeck2013, Salzman2013
chr7_102994368_102996240_+	hsa_circ_0002747	1873	220	Hs68_RNase, Hs68_control, K562, Hepg2, H1hesc, Gm12878, Bj, Ag04450, A549, Nhlf, Sknshra	None	ANNOTATED, CDS, coding, INTERNAL, OVCODE, OVERLAPTX, OVEXON	NM_002803	PSMC2	Jeck2013, Salzman2013
chr9_132984929_132988783_+	hsa_circ_0089090	3855	283	Helas3, A549	NA	ANNOTATED, CDS, coding, INTERNAL, OVCODE, OVEXON, UTR3	NM_014286	NCS1	Salzman2013
chr4_119541569_119549381_+	hsa_circ_0008493	7813	7070	Hs68_RNase, Hs68_control	DNA	ALT_ACCEPTOR, ncRNA, OVEXON, upstream_start	TCONS_l2_00020705	TCONS_l2_00020705	Jeck2013
chr4_6925100_6925838_+	hsa_circ_0001394	739	739	cd_19, Hs68_RNase, Hs68_control, K562, Hepg2, H1hesc, Gm12878, Ag04450, Nhek, Sknshra, Mcf7	None	ANNOTATED, CDS, coding, INTERNAL, OVCODE, OVEXON, UTR5	NM_001113361	TBC1D14	Jeck2013, Memczak2013, Salzman2013
chr2_32664576_32679010_+	hsa_circ_0053593	14435	1122	K562, Huvec, Gm12878, Ag04450, A549, Sknshra	NA	ANNOTATED, CDS, coding, INTERNAL, OVCODE, OVEXON	NM_016252	BIRC6	Salzman2013
chr6_76550302_76551095_+	hsa_circ_0077101	794	263	Gm12878	NA	ANNOTATED, CDS, coding, INTERNAL, OVCODE, OVEXON	NM_004999	MYO6	Salzman2013
chr15_100692817_100695525_-	hsa_circ_0037060	2709	292	H1hesc, Gm12878	NA	ANNOTATED, CDS, coding, INTERNAL, OVCODE, OVERLAPTX, OVEXON	NM_139057	ADAMTS17	Salzman2013
chr5_179135240_179136060_+	hsa_circ_0005778	821	224	Hs68_RNase, Hs68_control, K562, H1hesc, Gm12878, A549, Sknshra	None	ANNOTATED, CDS, coding, INTERNAL, OVCODE, OVEXON	NM_001746	CANX	Jeck2013, Salzman2013
chr22_24002052_24026054_-	hsa_circ_0062545	24003	279	K562, Huvec, Hepg2, Helas3, H1hesc, Gm12878, Ag04450, A549, Nhlf	NA	ANNOTATED, INTERNAL, ncRNA, OVERLAPTX, OVEXON	NR_024448	GUSBP11	Salzman2013
chr8_125332327_125339662_-	hsa_circ_0085495	7336	272	K562, Bj, Ag04450, A549, Sknshra	NA	ANNOTATED, CDS, coding, INTERNAL, OVCODE, OVEXON	NM_194291	TMEM65	Salzman2013
chr2_61709515_61717911_-	hsa_circ_0054853	8397	1085	Nhek, K562, H1hesc, Gm12878, Bj, Ag04450, A549, Sknshra	NA	ANNOTATED, CDS, coding, INTERNAL, OVCODE, OVERLAPTX, OVEXON	NM_003400	XPO1	Salzman2013
chr1_227381487_227441856_-	hsa_circ_0016754	60370	421	K562, Helas3, Sknshra	NA	ANNOTATED, CDS, coding, INTERNAL, OVCODE, OVERLAPTX, OVEXON	NM_003607	CDC42BPA	Salzman2013
chr5_6604251_6605521_-	hsa_circ_0001466	1271	356	cd_19, Hs68_RNase, Hs68_control	None	ANNOTATED, CDS, coding, INTERNAL, OVCODE, OVEXON	NM_001193455	NSUN2	Jeck2013, Memczak2013
chr11_63419408_63420047_-	hsa_circ_0022599	640	156	Bj, Ag04450, A549, Sknshra, Mcf7	NA	ANNOTATED, CDS, coding, INTERNAL, OVCODE, OVERLAPTX, OVEXON	NM_015459	ATL3	Salzman2013
chr7_98497045_98501140_+	hsa_circ_0081243	4096	403	K562, Gm12878, Ag04450	NA	ANNOTATED, CDS, coding, INTERNAL, OVCODE, OVEXON	NM_001244580	TRRAP	Salzman2013
chr2_69556429_69556930_-	hsa_circ_0005595	502	243	Hs68_RNase, Hs68_control, K562, A549	None	ANNOTATED, CDS, coding, INTERNAL, OVCODE, OVEXON	NM_001244710	GFPT1	Jeck2013, Salzman2013
chr7_111575595_111585853_-	hsa_circ_0005937	10259	365	Hs68_RNase, Hs68_control, H1hesc, Sknshra	None	ANNOTATED, CDS, coding, INTERNAL, OVCODE, OVEXON	NM_014705	DOCK4	Jeck2013, Salzman2013
chr17_35797839_35800763_+	hsa_circ_0043278	2925	250	K562, Helas3, H1hesc, Gm12878, Bj, Ag04450, A549, Sknshra	NA	ANNOTATED, CDS, coding, INTERNAL, OVCODE, OVEXON	NM_001488	TADA2A	Salzman2013
chr3_179437728_179448497_+	hsa_circ_0005859	10770	449	Hs68_RNase, Hs68_control	None	ANNOTATED, CDS, coding, INTERNAL, OVCODE, OVEXON	NM_003940	USP13	Jeck2013
chr3_51575514_51586079_+	hsa_circ_0001306	10566	10566	cd_19	LINE	ALT_ACCEPTOR, ALT_DONOR, coding, intronic, upstream_start, UTR5	NM_015106	RAD54L2	Memczak2013
chrX_23739998_23751334_-	hsa_circ_0090093	11337	443	Hepg2, Helas3, H1hesc, Gm12878, Ag04450, A549	NA	ANNOTATED, CDS, coding, INTERNAL, OVCODE, OVEXON	NM_001037171	ACOT9	Salzman2013
chr13_46090278_46099186_+	hsa_circ_0008937	8909	421	Hs68_RNase, Hs68_control, K562, H1hesc, Bj, Ag04450, Mcf7	None	ANNOTATED, CDS, coding, INTERNAL, OVCODE, OVEXON	NM_031431	COG3	Jeck2013, Salzman2013
chr4_905461_907456_-	hsa_circ_0005830	1996	237	Hs68_RNase, Hs68_control, K562, H1hesc, Bj, Ag04450, Nhek, Sknshra	None	ANNOTATED, CDS, coding, INTERNAL, OVCODE, OVEXON	NM_005255	GAK	Jeck2013, Salzman2013
chr2_234296903_234299129_+	hsa_circ_0001112	2227	192	cd_19, cd_34, Hs68_RNase, Hs68_control	None	ANNOTATED, CDS, coding, INTERNAL, OVCODE, OVEXON	NM_152879	DGKD	Jeck2013, Memczak2013
chr6_57393112_57398317_+	hsa_circ_0004247	5206	259	Hs68_RNase, Hs68_control	None	ANNOTATED, CDS, coding, INTERNAL, OVCODE, OVEXON	NM_000947	PRIM2	Jeck2013
chr9_134312007_134314448_+	hsa_circ_0005871	2442	176	Hs68_RNase, Hs68_control, K562, Huvec, Hepg2, Helas3, H1hesc, Gm12878, Bj, Ag04450, A549, Nhek, Sknshra, Mcf7	None	ANNOTATED, CDS, coding, INTERNAL, OVCODE, OVEXON	NM_013318	PRRC2B	Jeck2013, Salzman2013
chr2_38536521_38546161_-	hsa_circ_0002918	9641	708	Hs68_RNase, Hs68_control, Gm12878	None	ANNOTATED, CDS, coding, INTERNAL, OVCODE, OVEXON	NM_022374	ATL2	Jeck2013, Salzman2013
chr8_42761316_42785315_+	hsa_circ_0003078	24000	210	Hs68_RNase, Hs68_control	None	ANNOTATED, CDS, coding, INTERNAL, OVCODE, OVEXON	NM_032410	HOOK3	Jeck2013
chr5_73069680_73076570_+	hsa_circ_0072995	6891	435	Huvec	NA	ANNOTATED, CDS, coding, INTERNAL, OVCODE, OVERLAPTX, OVEXON	NM_001080479	RGNEF	Salzman2013
chr18_697240_706578_-	hsa_circ_0046689	9339	225	K562, Helas3, H1hesc, Bj, Ag04450, A549, Sknshra	NA	ANNOTATED, CDS, coding, INTERNAL, OVCODE, OVERLAPTX, OVEXON	NM_017512	ENOSF1	Salzman2013
chr1_230798887_230807386_+	hsa_circ_0016867	8500	599	K562, H1hesc, Gm12878, Bj, Ag04450, Sknshra	NA	ANNOTATED, CDS, coding, INTERNAL, OVCODE, OVEXON	NM_007357	COG2	Salzman2013
chr6_20781376_20955816_+	hsa_circ_0075811	174441	392	Hepg2, H1hesc, Gm12878, Ag04450	NA	ANNOTATED, CDS, coding, INTERNAL, OVCODE, OVERLAPTX, OVEXON	NM_017774	CDKAL1	Salzman2013
chr12_111991962_111993723_-	hsa_circ_0000439	1762	97	cd_19, K562, Bj, Ag04450, A549, Sknshra	None	ANNOTATED, CDS, coding, INTERNAL	NM_002973	ATXN2	Memczak2013, Salzman2013
chr19_37203288_37203769_+	hsa_circ_0004386	482	214	Hs68_RNase, Hs68_control, K562, H1hesc	None	ANNOTATED, CDS, coding, INTERNAL, OVCODE, OVEXON, UTR5	NM_152603	ZNF567	Jeck2013, Salzman2013
chr22_46096162_46136418_+	hsa_circ_0001246	40257	782	HEK293, Hs68_RNase, Hs68_control, Nhek, K562, Hepg2, Helas3, H1hesc, Gm12878, Bj, Ag04450, A549, Sknshra	None	ANNOTATED, CDS, coding, INTERNAL, OVCODE, OVEXON	NM_013236	ATXN10	Jeck2013, Memczak2013, Salzman2013
chr14_31097415_31107453_+	hsa_circ_0031417	10039	374	Gm12878	NA	ANNOTATED, CDS, coding, INTERNAL, OVCODE, OVEXON	NM_016106	SCFD1	Salzman2013
chr1_161071838_161072165_-	hsa_circ_0000145	328	213	cd_34, Hs68_RNase, Hs68_control	None	ANNOTATED, CDS, coding, INTERNAL, OVCODE, OVEXON	NM_012394	PFDN2	Jeck2013, Memczak2013
chr5_72182897_72184130_+	hsa_circ_0072932	1234	379	K562, Helas3, H1hesc, Gm12878, Bj, Ag04450, A549	NA	ANNOTATED, CDS, coding, INTERNAL, OVCODE, OVEXON	NM_002270	TNPO1	Salzman2013
chr20_47688823_47689234_+	hsa_circ_0060745	412	298	K562, Hepg2, A549	NA	ANNOTATED, CDS, coding, INTERNAL, OVCODE, OVEXON	NM_001316	CSE1L	Salzman2013
chr1_11133991_11137005_-	hsa_circ_0002448	3015	278	Hs68_RNase, Hs68_control	None	ANNOTATED, CDS, coding, INTERNAL, OVCODE, OVEXON	NM_001001998	EXOSC10	Jeck2013
chr2_29375551_29390406_+	hsa_circ_0008728	14856	702	Hs68_RNase, Hs68_control, A549	None	ANNOTATED, CDS, coding, INTERNAL, OVCODE, OVEXON	NM_024692	CLIP4	Jeck2013, Salzman2013
chr5_170319391_170351554_+	hsa_circ_0003696	32164	1212	Hs68_RNase, Hs68_control, H1hesc, Bj, Ag04450, A549, Sknshra, Mcf7	None	ANNOTATED, CDS, coding, INTERNAL, OVCODE, OVEXON	NM_022897	RANBP17	Jeck2013, Salzman2013
chr2_240944627_240946787_-	hsa_circ_0058920	2161	141	K562, Gm12878	NA	ANNOTATED, CDS, coding, INTERNAL, OVCODE, OVEXON	NM_004544	NDUFA10	Salzman2013
chr4_106367540_106377902_-	hsa_circ_0007477	10363	284	Hs68_RNase, Hs68_control, K562, Hepg2, Helas3, H1hesc, Gm12878, Bj, Ag04450, A549, Nhek, Sknshra, Mcf7	None	ANNOTATED, CDS, coding, INTERNAL, OVCODE, OVEXON	NM_176869	PPA2	Jeck2013, Salzman2013
chr14_75506614_75509180_-	hsa_circ_0032644	2567	290	K562, H1hesc, Gm12878, Bj	NA	ANNOTATED, CDS, coding, INTERNAL, OVCODE, OVEXON	NM_001040108	MLH3	Salzman2013
chr3_128356642_128356948_-	hsa_circ_0067230	307	307	Nhek, K562, Hepg2, Helas3, H1hesc, Gm12878, Sknshra, Mcf7	NA	ANNOTATED, CDS, coding, INTERNAL, OVCODE, OVEXON	NM_002950	RPN1	Salzman2013
chr16_69184440_69184807_+	hsa_circ_0040021	368	264	Nhek, K562, Huvec, Hepg2, Gm12878, Ag04450, Sknshra	NA	ANNOTATED, CDS, coding, INTERNAL, OVCODE, OVEXON	NM_032830	CIRH1A	Salzman2013
chr9_80921230_80923499_+	hsa_circ_0087275	2270	343	Hepg2, H1hesc, Gm12878, Bj, Ag04450, Nhek	NA	ANNOTATED, CDS, coding, INTERNAL, OVCODE, OVEXON	NM_058179	PSAT1	Salzman2013
chr2_10799298_10808849_-	hsa_circ_0008511	9552	292	Hs68_RNase, Hs68_control, Nhek, K562, Hepg2, Helas3	None	ANNOTATED, CDS, coding, INTERNAL, OVCODE, OVEXON	NM_024894	NOL10	Jeck2013, Salzman2013
chr6_167435897_167438382_+	hsa_circ_0004556	2486	340	Hs68_RNase, Hs68_control, K562, Helas3, Gm12878, Sknshra	None	ANNOTATED, CDS, coding, INTERNAL, OVCODE, OVEXON	NM_007045	FGFR1OP	Jeck2013, Salzman2013
chr3_172491693_172504364_+	hsa_circ_0068024	12672	479	K562, A549	NA	ANNOTATED, CDS, coding, INTERNAL, OVCODE, OVEXON	NM_018098	ECT2	Salzman2013
chr2_220011402_220023084_-	hsa_circ_0002776	11683	588	Hs68_RNase, Hs68_control, K562	None	ANNOTATED, CDS, coding, INTERNAL, OVCODE, OVEXON	NM_024782	NHEJ1	Jeck2013, Salzman2013
chr6_90461150_90463341_-	hsa_circ_0001619	2192	263	cd_19, cd_34, Hs68_RNase, Hs68_control	None	ANNOTATED, CDS, coding, INTERNAL, OVCODE, OVEXON	NM_014611	MDN1	Jeck2013, Memczak2013
chr6_87925621_87928449_+	hsa_circ_0004058	2829	370	Hs68_RNase, Hs68_control, K562, Helas3, H1hesc, Gm12878, Bj, Ag04450, A549, Nhek, Sknshra	None	ANNOTATED, CDS, coding, INTERNAL, OVCODE, OVEXON	NM_015021	ZNF292	Jeck2013, Salzman2013
chr1_178777180_178802685_+	hsa_circ_0015400	25506	394	H1hesc	NA	ANNOTATED, CDS, coding, INTERNAL, OVCODE, OVEXON	NM_152663	RALGPS2	Salzman2013
chr4_52729603_52758017_+	hsa_circ_0007646	28415	481	Hs68_RNase, Hs68_control, K562, Hepg2, Helas3, H1hesc, Gm12878, Bj, Ag04450, A549, Nhek, Sknshra	None	ANNOTATED, CDS, coding, INTERNAL, OVCODE, OVEXON	NM_001040402	DCUN1D4	Jeck2013, Salzman2013
chr22_30366965_30394846_+	hsa_circ_0002655	27882	641	Hs68_RNase, Hs68_control, K562	None	ANNOTATED, CDS, coding, INTERNAL, OVCODE, OVEXON, UTR5	NM_021090	MTMR3	Jeck2013, Salzman2013
chr20_57009658_57016139_+	hsa_circ_0060986	6482	362	Nhek, K562, Huvec, Ag04450	NA	ANNOTATED, CDS, coding, INTERNAL, OVCODE, OVEXON	NM_004738	VAPB	Salzman2013
chr2_172782047_172809519_+	hsa_circ_0008032	27473	302	Hs68_RNase, Hs68_control, Nhek, K562, Hepg2, Helas3, H1hesc, Gm12878, Bj, Ag04450, A549, Sknshra	None	ANNOTATED, CDS, coding, INTERNAL, OVCODE, OVEXON	NM_003642	HAT1	Jeck2013, Salzman2013
chr12_50847243_50848200_+	hsa_circ_0026238	958	317	K562, Hepg2	NA	ANNOTATED, CDS, coding, INTERNAL, OVCODE, OVEXON	NM_052879	LARP4	Salzman2013
chr8_145245687_145255444_+	hsa_circ_0001833	9758	579	cd_19, Hs68_RNase, Hs68_control, Nhek, K562, Hepg2, Helas3, H1hesc, Gm12878, Bj, Ag04450, A549, Nhlf, Mcf7	None	ANNOTATED, CDS, coding, INTERNAL, OVCODE, OVEXON	NM_001099281	HEATR7A	Jeck2013, Memczak2013, Salzman2013
chr11_47187819_47189802_-	hsa_circ_0000298	1984	604	cd_19, K562, H1hesc, Gm12878, A549	None	ANNOTATED, CDS, coding, INTERNAL	NM_032389	ARFGAP2	Memczak2013, Salzman2013
chr11_28311753_28318478_+	hsa_circ_0008239	6726	371	Hs68_RNase, Hs68_control, K562, Hepg2, Gm12878, Bj, Ag04450, A549	None	ANNOTATED, CDS, coding, INTERNAL, OVCODE, OVEXON	NM_152636	METTL15	Jeck2013, Salzman2013
chr13_42439872_42442613_-	hsa_circ_0000478	2742	345	HEK293, cd_19, Hs68_RNase, Hs68_control, Nhek, K562, Hepg2, H1hesc, Gm12878, Bj, Ag04450, A549, Sknshra	None	ANNOTATED, CDS, coding, INTERNAL, OVCODE, OVEXON	NM_001009814	KIAA0564	Jeck2013, Memczak2013, Salzman2013
chr7_810108_814799_+	hsa_circ_0001667	4692	456	cd_19, Hs68_RNase, Hs68_control, Nhek, K562, Huvec, Hepg2, Helas3, H1hesc, Gm12878, Bj, Ag04450, A549, Sknshra, Mcf7	None	ANNOTATED, CDS, coding, INTERNAL, OVCODE, OVEXON	NM_017802	HEATR2	Jeck2013, Memczak2013, Salzman2013
chr12_90049456_90049884_-	hsa_circ_0007621	429	429	Hs68_RNase, Hs68_control	None	ALT_ACCEPTOR, CDS, coding, OVCODE, OVEXON, upstream_start, UTR5	NM_001001323	ATP2B1	Jeck2013
chr17_34910661_34923615_+	hsa_circ_0003930	12955	548	Hs68_RNase, Hs68_control, K562, Helas3, A549	None	ANNOTATED, CDS, coding, INTERNAL, OVCODE, OVEXON	NM_024835	GGNBP2	Jeck2013, Salzman2013
chr20_31379407_31380576_+	hsa_circ_0059802	1170	253	Nhek, K562, H1hesc, Ag04450	NA	ANNOTATED, CDS, coding, INTERNAL, OVCODE, OVEXON	NM_006892	DNMT3B	Salzman2013
chr7_45103517_45104245_+	hsa_circ_0007145	729	268	Hs68_RNase, Hs68_control, Nhek, K562, Huvec, Helas3, H1hesc, Gm12878, Bj, Ag04450, Sknshra	None	ANNOTATED, CDS, coding, INTERNAL, OVCODE, OVEXON	NM_031443	CCM2	Jeck2013, Salzman2013
chr10_65140078_65169748_-	hsa_circ_0005144	29671	29671	Hs68_RNase, Hs68_control	LINE	ALT_ACCEPTOR, CDS, coding, INTERNAL, intronic, OVCODE, OVEXON	NM_032776	JMJD1C	Jeck2013
chr14_103465902_103478525_-	hsa_circ_0005178	12624	421	Hs68_RNase, Hs68_control	None	ANNOTATED, CDS, coding, INTERNAL, OVCODE, OVEXON	NM_006035	CDC42BPB	Jeck2013
chr16_249061_258187_-	hsa_circ_0005648	9127	432	Hs68_RNase, Hs68_control, K562, Hsmm, Hepg2, H1hesc, Gm12878, A549	None	ANNOTATED, CDS, coding, INTERNAL, OVCODE, OVEXON	NM_018032	LUC7L	Jeck2013, Salzman2013
chr12_117383169_117387511_+	hsa_circ_0005531	4343	254	Hs68_RNase, Hs68_control, K562, A549	None	ANNOTATED, CDS, coding, INTERNAL, OVCODE, OVEXON	NM_153348	FBXW8	Jeck2013, Salzman2013
chr1_246600450_246603426_-	hsa_circ_0005988	2977	2977	Hs68_RNase, Hs68_control	SINE	ALT_ACCEPTOR, ALT_DONOR, coding, INTERNAL, intronic	NM_001167740	SMYD3	Jeck2013
chr16_21350242_21363459_+	hsa_circ_0002317	13218	10549	Hs68_RNase, Hs68_control	None	ALT_ACCEPTOR, ncRNA, OVEXON, upstream_start	NR_045011	RUNDC2B	Jeck2013
chr1_46290105_46348067_+	hsa_circ_0012278	57963	323	Helas3, A549	NA	ANNOTATED, CDS, coding, INTERNAL, OVCODE, OVERLAPTX, OVEXON	NM_015112	MAST2	Salzman2013
chr4_38091553_38104778_+	hsa_circ_0001402	13226	507	cd_19, neutr, Hs68_RNase, Hs68_control, K562, Huvec, Hsmm, Hepg2, Helas3, H1hesc, Gm12878, Bj, Ag04450, A549, Nhek, Nhlf, Sknshra, Mcf7	None	ANNOTATED, CDS, coding, INTERNAL, OVCODE, OVEXON	NM_015173	TBC1D1	Jeck2013, Memczak2013, Salzman2013
chr8_100108540_100133673_+	hsa_circ_0085053	25134	915	Mcf7	NA	ANNOTATED, CDS, coding, INTERNAL, OVCODE, OVEXON	NM_017890	VPS13B	Salzman2013
chr16_74942806_74943815_-	hsa_circ_0040509	1010	323	Nhek, K562, Hepg2, Helas3, Gm12878, Ag04450, A549	NA	ANNOTATED, CDS, coding, INTERNAL, OVCODE, OVEXON	NM_030581	WDR59	Salzman2013
chr4_120166492_120170037_+	hsa_circ_0006558	3546	228	Hs68_RNase, Hs68_control, K562, Hepg2, Helas3, H1hesc, Bj, A549, Sknshra	None	ANNOTATED, CDS, coding, INTERNAL, OVCODE, OVEXON	NM_019050	USP53	Jeck2013, Salzman2013
chr6_106727536_106740981_-	hsa_circ_0077535	13446	242	K562	NA	ANNOTATED, CDS, coding, INTERNAL, OVCODE, OVEXON	NM_004849	ATG5	Salzman2013
chr14_53558503_53570574_-	hsa_circ_0031977	12072	472	Nhek, Gm12878, Sknshra	NA	ANNOTATED, CDS, coding, INTERNAL, OVCODE, OVERLAPTX, OVEXON	NM_001160147	DDHD1	Salzman2013
chr2_135010666_135076310_+	hsa_circ_0007631	65645	1882	Hs68_RNase, Hs68_control	None	ALT_ACCEPTOR, CDS, coding, OVCODE, OVEXON, upstream_start, UTR5	NM_002410	MGAT5	Jeck2013
chr17_59999086_60002460_-	hsa_circ_0007759	3375	242	Hs68_RNase, Hs68_control, Nhek, K562, Huvec, Hepg2, H1hesc, Gm12878, Ag04450, Sknshra, Mcf7	None	ANNOTATED, INTERNAL, ncRNA, OVCODE, OVEXON	NR_026641	INTS2	Jeck2013, Salzman2013
chr4_7840251_7845077_-	hsa_circ_0069144	4827	392	Nhek	NA	ANNOTATED, CDS, coding, INTERNAL, OVCODE, OVEXON	NM_001134647	AFAP1	Salzman2013
chr1_59787208_59812070_+	hsa_circ_0000075	24863	479	cd_19, neutr, Hs68_RNase, Hs68_control, K562, Hepg2, Helas3, H1hesc, Gm12878, Bj, Ag04450, A549, Sknshra	None	ANNOTATED, CDS, coding, INTERNAL, OVCODE, OVEXON, UTR5	NM_018291	FGGY	Jeck2013, Memczak2013, Salzman2013
chr5_36211946_36227667_-	hsa_circ_0002292	15722	560	Hs68_RNase, Hs68_control, K562, Hepg2, Ag04450, Sknshra	None	ANNOTATED, CDS, coding, INTERNAL, OVCODE, OVEXON	NM_001085411	NADKD1	Jeck2013, Salzman2013
chr12_123030723_123032516_+	hsa_circ_0029098	1794	318	K562, Helas3, Bj, A549	NA	ANNOTATED, CDS, coding, INTERNAL, OVCODE, OVEXON	NM_014708	KNTC1	Salzman2013
chr12_116534474_116675510_-	hsa_circ_0003059	141037	407	Hs68_RNase, Hs68_control	None	ANNOTATED, CDS, coding, INTERNAL, OVCODE, OVEXON	NM_015335	MED13L	Jeck2013
chr7_129760589_129762042_+	hsa_circ_0002190	1454	304	Hs68_RNase, Hs68_control, K562, Huvec, Helas3, Gm12878, Bj, Ag04450, A549, Sknshra	None	ANNOTATED, CDS, coding, INTERNAL, OVCODE, OVEXON	NM_014997	KLHDC10	Jeck2013, Salzman2013
chr2_58425714_58459247_-	hsa_circ_0003165	33534	459	Hs68_RNase, Hs68_control	None	ANNOTATED, CDS, coding, INTERNAL, OVCODE, OVEXON	NM_001114636	FANCL	Jeck2013
chr10_98618049_98667504_+	hsa_circ_0006198	49456	49119	Hs68_RNase, Hs68_control	None	ALT_ACCEPTOR, coding, INTERNAL, intronic, OVEXON, UTR5	NM_032440	LCOR	Jeck2013
chr12_112910748_112915819_+	hsa_circ_0005784	5072	336	Hs68_RNase, Hs68_control, Nhek, Sknshra	None	ANNOTATED, CDS, coding, INTERNAL, OVCODE, OVEXON	NM_002834	PTPN11	Jeck2013, Salzman2013
chr19_9767223_9770143_-	hsa_circ_0003516	2921	323	Hs68_RNase, Hs68_control	None	ANNOTATED, CDS, coding, INTERNAL, OVCODE, OVEXON	NM_001130031	ZNF562	Jeck2013
chr4_52729603_52744020_+	hsa_circ_0001410	14418	318	HEK293, cd_19, Hs68_RNase, Hs68_control, K562, Huvec, Hepg2, Helas3, H1hesc, Gm12878, Bj, Ag04450, A549, Nhek, Sknshra	None	ANNOTATED, CDS, coding, INTERNAL, OVCODE, OVEXON	NM_015115	DCUN1D4	Jeck2013, Memczak2013, Salzman2013
chr13_47224336_47243291_+	hsa_circ_0030200	18956	272	K562, H1hesc, Gm12878, A549	NA	ANNOTATED, CDS, coding, INTERNAL, OVCODE, OVEXON	NM_001164211	LRCH1	Salzman2013
chr3_47716965_47727660_-	hsa_circ_0001295	10696	576	cd_19, Hs68_RNase, Hs68_control, K562, Huvec, Hepg2, H1hesc, Ag04450, A549, Sknshra, Mcf7	None	ANNOTATED, CDS, coding, INTERNAL, OVCODE, OVEXON	NM_003074	SMARCC1	Jeck2013, Memczak2013, Salzman2013
chrX_14868627_14877456_-	hsa_circ_0006971	8830	545	Hs68_RNase, Hs68_control, K562, Gm12878, Ag04450, Sknshra	None	ANNOTATED, CDS, coding, INTERNAL, OVCODE, OVEXON	NM_001018113	FANCB	Jeck2013, Salzman2013
chr8_30332295_30336893_+	hsa_circ_0007409	4599	180	Hs68_RNase, Hs68_control, Nhek, Hepg2, Helas3, H1hesc, Bj, Ag04450, A549, Sknshra, Mcf7	None	ANNOTATED, CDS, coding, INTERNAL, OVCODE, OVEXON	NM_006867	RBPMS	Jeck2013, Salzman2013
chr14_76173361_76187046_+	hsa_circ_0032704	13686	457	Nhek, K562, Helas3, H1hesc, Gm12878, Bj, Ag04450, A549	NA	ANNOTATED, CDS, coding, INTERNAL, OVCODE, OVEXON	NM_015072	TTLL5	Salzman2013
chr2_204267299_204291992_+	hsa_circ_0007951	24694	513	Hs68_RNase, Hs68_control	None	ALT_DONOR, CDS, coding, INTERNAL, OVCODE, OVEXON	NM_005759	ABI2	Jeck2013
chr1_211092982_211093411_-	hsa_circ_0006123	430	430	Hs68_RNase, Hs68_control, Hsmm, Bj, Ag04450, A549, Sknshra	None	ANNOTATED, CDS, coding, INTERNAL, OVCODE, OVEXON	NM_172362	KCNH1	Jeck2013, Salzman2013
chr22_43286953_43287188_-	hsa_circ_0002610	236	236	Hs68_RNase, Hs68_control, Nhek, K562, Hepg2, H1hesc, Gm12878, Ag04450	None	ANNOTATED, CDS, coding, INTERNAL, OVCODE, OVEXON	NM_001184970	PACSIN2	Jeck2013, Salzman2013
chr3_195605124_195615477_-	hsa_circ_0001377	10354	1274	cd_19, Hs68_RNase, Hs68_control, Nhek, K562, Hepg2, Helas3, H1hesc, Gm12878, Bj, Ag04450, A549	None	ANNOTATED, CDS, coding, INTERNAL, OVCODE, OVEXON, UTR5	NM_001010938	TNK2	Jeck2013, Memczak2013, Salzman2013
chr19_47865733_47865950_+	hsa_circ_0051680	218	218	K562, Huvec, Hsmm, Hepg2, Helas3, H1hesc, Gm12878, Bj, Ag04450, A549, Nhek, Nhlf, Sknshra, Mcf7	NA	ANNOTATED, CDS, coding, INTERNAL, OVCODE, OVEXON	NM_014681	DHX34	Salzman2013
chr3_183361268_183369064_+	hsa_circ_0001367	7797	1044	cd_19, Hs68_RNase, Hs68_control, K562, Helas3, H1hesc, Gm12878, Bj, Ag04450, A549, Sknshra, Mcf7	None	ANNOTATED, CDS, coding, INTERNAL, OVCODE, OVEXON, UTR5	NM_017644	KLHL24	Jeck2013, Memczak2013, Salzman2013
chr8_131226802_131249240_-	hsa_circ_0085611	22439	219	Ag04450, A549, Sknshra	NA	ANNOTATED, CDS, coding, INTERNAL, OVCODE, OVEXON	NM_001247996	ASAP1	Salzman2013
chr19_50902108_50902741_+	hsa_circ_0052012	634	317	Nhek, K562, Huvec, Hepg2, Helas3, H1hesc, Gm12878, Bj, Ag04450, A549, Sknshra, Mcf7	NA	ANNOTATED, CDS, coding, INTERNAL, OVCODE, OVEXON, UTR5	NM_002691	POLD1	Salzman2013
chr3_119582266_119624699_-	hsa_circ_0008797	42434	420	Hs68_RNase, Hs68_control, Nhek, K562, Hsmm, Hepg2, Helas3, H1hesc, Gm12878, Bj, Ag04450, A549, Sknshra, Mcf7	None	ANNOTATED, CDS, coding, INTERNAL, OVCODE, OVEXON	NM_002093	GSK3B	Jeck2013, Salzman2013
chr3_196812451_196831876_-	hsa_circ_0068687	19426	395	K562	NA	ANNOTATED, CDS, coding, INTERNAL, OVCODE, OVEXON	NM_004087	DLG1	Salzman2013
chr19_4941540_4941943_+	hsa_circ_0005837	404	288	Hs68_RNase, Hs68_control, K562, Huvec, Hepg2, Helas3, Gm12878, Bj, Ag04450	None	ANNOTATED, CDS, coding, INTERNAL, OVCODE, OVEXON	NM_013282	UHRF1	Jeck2013, Salzman2013
chr5_37115062_37120442_-	hsa_circ_0072202	5381	215	Ag04450, Nhek	NA	ANNOTATED, CDS, coding, INTERNAL, OVCODE, OVEXON	NM_023073	C5orf42	Salzman2013
chr15_85230856_85234875_-	hsa_circ_0036599	4020	260	K562, Helas3	NA	ANNOTATED, CDS, coding, INTERNAL, OVCODE, OVEXON	NM_014300	SEC11A	Salzman2013
chr7_155556506_155567341_+	hsa_circ_0083111	10836	485	K562, Hepg2, H1hesc, Gm12878, Ag04450, Sknshra	NA	ANNOTATED, CDS, coding, INTERNAL, OVCODE, OVEXON	NM_053043	RBM33	Salzman2013
chr1_175956079_175958615_-	hsa_circ_0004722	2537	404	Hs68_RNase, Hs68_control, K562, Hepg2, Helas3, H1hesc, Gm12878	None	ANNOTATED, CDS, coding, INTERNAL, OVCODE, OVEXON	NM_022457	RFWD2	Jeck2013, Salzman2013
chr1_29362338_29365938_+	hsa_circ_0000042	3601	271	cd_19, Nhek, K562, Huvec, Hepg2, Helas3, H1hesc, Gm12878, Bj, Ag04450, Sknshra, Mcf7	None	ANNOTATED, CDS, coding, INTERNAL	NM_001166007	EPB41	Memczak2013, Salzman2013
chr6_111208708_111210186_+	hsa_circ_0004115	1479	214	Hs68_RNase, Hs68_control, K562, Helas3, H1hesc, Gm12878, Bj, Ag04450, A549, Nhek, Sknshra	None	ANNOTATED, CDS, coding, INTERNAL, OVCODE, OVEXON	NM_001634	AMD1	Jeck2013, Salzman2013
chr3_171965323_171969331_+	hsa_circ_0006156	4009	526	Hs68_RNase, Hs68_control, Nhek, K562, Huvec, Hsmm, Hepg2, Helas3, H1hesc, Ag04450, Sknshra	None	ANNOTATED, CDS, coding, INTERNAL, OVCODE, OVEXON	NM_022763	FNDC3B	Jeck2013, Salzman2013
chr1_176050288_176118210_-	hsa_circ_0015366	67923	515	K562, H1hesc, Bj, A549, Sknshra	NA	ANNOTATED, CDS, coding, INTERNAL, OVCODE, OVEXON	NM_022457	RFWD2	Salzman2013
chr5_74011335_74012498_+	hsa_circ_0007559	1164	268	Hs68_RNase, Hs68_control	None	ANNOTATED, CDS, coding, INTERNAL, OVCODE, OVEXON	NM_000521	HEXB	Jeck2013
chr4_78694235_78697546_-	hsa_circ_0006168	3312	395	Hs68_RNase, Hs68_control, K562, Huvec, Hepg2, Helas3, H1hesc, Gm12878, Bj, Ag04450, A549, Nhek, Sknshra, Mcf7	None	ANNOTATED, CDS, coding, INTERNAL, OVCODE, OVEXON	NM_144571	CNOT6L	Jeck2013, Salzman2013
chr2_100078958_100081447_-	hsa_circ_0001053	2490	191	cd_19, cd_34, Hs68_RNase, Hs68_control, Nhek, K562, Huvec, Hsmm, Hepg2, Helas3, H1hesc, Gm12878, Bj, Ag04450, A549, Sknshra	None	ANNOTATED, CDS, coding, INTERNAL, OVCODE, OVEXON, UTR5	NM_016316	REV1	Jeck2013, Memczak2013, Salzman2013
chr14_73614503_73614814_+	hsa_circ_0003848	312	222	Hs68_RNase, Hs68_control, Nhek, K562, Huvec, Hsmm, Hepg2, Helas3, H1hesc, Gm12878, Bj, Ag04450, A549, Sknshra, Mcf7	None	ANNOTATED, CDS, coding, INTERNAL, OVCODE, OVEXON, UTR5	NM_000021	PSEN1	Jeck2013, Salzman2013
chr12_117402502_117426674_+	hsa_circ_0005916	24173	562	Hs68_RNase, Hs68_control, K562, H1hesc, Bj, A549, Nhlf, Sknshra, Mcf7	None	ANNOTATED, CDS, coding, INTERNAL, OVCODE, OVEXON	NM_153348	FBXW8	Jeck2013, Salzman2013
chr20_3277508_3278822_-	hsa_circ_0059286	1315	236	K562, Huvec, H1hesc, Ag04450, A549	NA	ANNOTATED, CDS, coding, INTERNAL, OVCODE, OVEXON	NM_001009984	C20orf194	Salzman2013
chr15_65266940_65275931_-	hsa_circ_0003526	8992	476	Hs68_RNase, Hs68_control, Nhek, K562, Hepg2, Helas3, H1hesc, Bj, Ag04450, A549, Sknshra	None	ANNOTATED, CDS, coding, INTERNAL, OVCODE, OVEXON, UTR5	NM_016630	SPG21	Jeck2013, Salzman2013
chr2_72945232_72968598_-	hsa_circ_0002864	23367	556	Hs68_RNase, Hs68_control, H1hesc, Ag04450	None	ANNOTATED, CDS, coding, INTERNAL, OVCODE, OVEXON	NM_015189	EXOC6B	Jeck2013, Salzman2013
chr8_38947566_38948865_+	hsa_circ_0084051	1300	230	Ag04450, A549	NA	ANNOTATED, CDS, coding, INTERNAL, OVCODE, OVEXON	NM_003816	ADAM9	Salzman2013
chr10_21903760_21940697_+	hsa_circ_0017943	36938	286	K562	NA	ANNOTATED, CDS, coding, INTERNAL, OVCODE, OVERLAPTX, OVEXON	NM_004641	MLLT10	Salzman2013
chr1_198247091_198266370_+	hsa_circ_0006267	19280	426	Hs68_RNase, Hs68_control, K562, Hepg2, Helas3, Gm12878, Bj, Ag04450, A549	None	ANNOTATED, CDS, coding, INTERNAL, OVCODE, OVEXON	NM_133494	NEK7	Jeck2013, Salzman2013
chr12_102433646_102439897_-	hsa_circ_0002349	6252	285	Hs68_RNase, Hs68_control	None	ANNOTATED, CDS, coding, INTERNAL, OVCODE, OVEXON	NM_016053	CCDC53	Jeck2013
chr1_95609447_95616975_+	hsa_circ_0000095	7529	410	cd_19, neutr, K562, Helas3, H1hesc, A549, Sknshra	None	ANNOTATED, CDS, coding, INTERNAL, UTR5	NM_001199691	TMEM56-RWDD3	Memczak2013, Salzman2013
chr17_41576230_41582193_+	hsa_circ_0007036	5964	428	Hs68_RNase, Hs68_control, Hepg2, H1hesc, A549	None	ANNOTATED, CDS, coding, INTERNAL, OVCODE, OVEXON	NM_004941	DHX8	Jeck2013, Salzman2013
chr5_137897269_137903411_-	hsa_circ_0008356	6143	647	Hs68_RNase, Hs68_control, K562, Helas3, H1hesc, Gm12878, Bj, Ag04450, Nhek	None	ANNOTATED, CDS, coding, INTERNAL, OVCODE, OVEXON	NM_004134	HSPA9	Jeck2013, Salzman2013
chr4_1221987_1235307_-	hsa_circ_0007149	13321	495	Hs68_RNase, Hs68_control	None	ANNOTATED, CDS, coding, INTERNAL, OVCODE, OVEXON, UTR5	NM_001012614	CTBP1	Jeck2013
chr10_88598622_88635842_+	hsa_circ_0006675	37221	334	Hs68_RNase, Hs68_control	None	ANNOTATED, CDS, coding, INTERNAL, OVCODE, OVEXON, UTR5	NM_004329	BMPR1A	Jeck2013
chr1_215749244_215752480_+	hsa_circ_0000184	3237	352	cd_34, Hs68_RNase, Hs68_control, Nhek, K562, Helas3, H1hesc, Gm12878, Bj, Ag04450	None	ANNOTATED, CDS, coding, INTERNAL, OVCODE, OVEXON	NM_016121	KCTD3	Jeck2013, Memczak2013, Salzman2013
chrX_96327940_96354794_+	hsa_circ_0091212	26855	299	Gm12878	NA	ANNOTATED, CDS, coding, INTERNAL, OVCODE, OVEXON	NM_006729	DIAPH2	Salzman2013
chr11_86778736_86782657_+	hsa_circ_0023970	3922	221	K562, Huvec, Hepg2, Bj	NA	ANNOTATED, CDS, coding, INTERNAL, OVCODE, OVEXON	NM_022918	TMEM135	Salzman2013
chr7_66236870_66240380_+	hsa_circ_0006032	3511	363	Hs68_RNase, Hs68_control, Gm12878, Bj, Ag04450	None	ANNOTATED, CDS, coding, INTERNAL, OVCODE, OVEXON, UTR5	NM_014504	RABGEF1	Jeck2013, Salzman2013
chr13_100959446_100992513_+	hsa_circ_0030766	33068	359	K562	NA	ANNOTATED, CDS, coding, INTERNAL, OVCODE, OVEXON	NM_000282	PCCA	Salzman2013
chr19_10886379_10887892_+	hsa_circ_0049330	1514	303	K562, Hepg2, Gm12878, Ag04450, Sknshra, Mcf7	NA	ANNOTATED, CDS, coding, INTERNAL, OVCODE, OVEXON	NM_001005360	DNM2	Salzman2013
chr3_183857868_183858518_+	hsa_circ_0068264	651	391	Nhek, Hepg2, Helas3, Gm12878, A549, Mcf7	NA	ANNOTATED, CDS, coding, INTERNAL, OVCODE, OVEXON	NM_003907	EIF2B5	Salzman2013
chr12_19615444_19626289_+	hsa_circ_0006420	10846	316	Hs68_RNase, Hs68_control, Nhek, K562, Huvec, Hepg2, Helas3, H1hesc, Gm12878, Bj, Ag04450, A549, Sknshra	None	ANNOTATED, CDS, coding, INTERNAL, OVCODE, OVEXON	NM_153207	AEBP2	Jeck2013, Salzman2013
chr2_32142995_32157204_-	hsa_circ_0007385	14210	294	Hs68_RNase, Hs68_control, Nhek, K562, Huvec, Hsmm, Hepg2, Helas3, H1hesc, Gm12878, Bj, Ag04450, A549, Sknshra, Mcf7	None	ANNOTATED, CDS, coding, INTERNAL, OVCODE, OVEXON	NM_015955	MEMO1	Jeck2013, Salzman2013
chr17_59988881_60002460_-	hsa_circ_0002746	13580	661	Hs68_RNase, Hs68_control, K562, Huvec, Mcf7	None	ANNOTATED, INTERNAL, ncRNA, OVCODE, OVEXON	NR_026641	INTS2	Jeck2013, Salzman2013
chr5_38991051_38996984_-	hsa_circ_0072338	5934	191	K562, Hepg2, H1hesc, Gm12878, Bj, Ag04450, A549, Nhek	NA	ANNOTATED, CDS, coding, INTERNAL, OVCODE, OVEXON	NM_152756	RICTOR	Salzman2013
chr1_11076901_11078930_+	hsa_circ_0008660	2030	305	Hs68_RNase, Hs68_control	None	ANNOTATED, CDS, coding, INTERNAL, OVCODE, OVEXON	NM_007375	TARDBP	Jeck2013
chr12_133310971_133312098_-	hsa_circ_0006903	1128	298	Hs68_RNase, Hs68_control, Nhek, K562, Hepg2, Gm12878	None	ANNOTATED, CDS, coding, INTERNAL, OVCODE, OVEXON	NM_015114	ANKLE2	Jeck2013, Salzman2013
chr5_77805607_77806221_-	hsa_circ_0004539	615	615	Hs68_RNase, Hs68_control, Hepg2, Helas3, H1hesc, Gm12878, Ag04450, A549, Nhek, Nhlf, Sknshra	None	ANNOTATED, CDS, coding, INTERNAL, OVCODE, OVEXON, UTR5	NM_005779	LHFPL2	Jeck2013, Salzman2013
chr7_157009561_157018233_+	hsa_circ_0001774	8673	424	cd_19	None	ANNOTATED, CDS, coding, INTERNAL	NM_014671	UBE3C	Memczak2013
chr13_30104675_30110339_-	hsa_circ_0006290	5665	718	Hs68_RNase, Hs68_control	None	ANNOTATED, CDS, coding, INTERNAL, OVCODE, OVEXON, UTR5	NM_003045	SLC7A1	Jeck2013
chr5_139889222_139889766_+	hsa_circ_0001542	545	339	cd_19, K562, Hepg2, Helas3, Gm12878, Nhek, Sknshra, Mcf7	None	ANNOTATED, CDS, coding, INTERNAL	NM_017747	ANKHD1	Memczak2013, Salzman2013
chr6_89600214_89601634_-	hsa_circ_0077293	1421	212	K562	NA	ANNOTATED, CDS, coding, INTERNAL, OVCODE, OVEXON	NM_003800	RNGTT	Salzman2013
chr3_65415195_65428524_-	hsa_circ_0003540	13330	1089	Hs68_RNase, Hs68_control	None	ANNOTATED, CDS, coding, INTERNAL, OVCODE, OVEXON	NM_015520	MAGI1	Jeck2013
chr7_65592691_65610487_+	hsa_circ_0080340	17797	411	Helas3, A549	NA	ANNOTATED, INTERNAL, ncRNA, OVCODE, OVERLAPTX, OVEXON	NR_024548	CRCP	Salzman2013
chr5_65288538_65290692_+	hsa_circ_0003830	2155	316	Hs68_RNase, Hs68_control	None	ANNOTATED, CDS, coding, INTERNAL, OVCODE, OVEXON, UTR5	NM_001253699	ERBB2IP	Jeck2013
chr1_6291962_6293703_-	hsa_circ_0007427	1742	388	Hs68_RNase, Hs68_control, Nhek, K562, Hepg2, H1hesc, Gm12878, Bj, Ag04450	None	ANNOTATED, CDS, coding, INTERNAL, OVCODE, OVEXON	NM_012405	ICMT	Jeck2013, Salzman2013
chr2_120684174_120702816_+	hsa_circ_0056248	18643	514	K562, H1hesc, Sknshra	NA	ANNOTATED, CDS, coding, INTERNAL, OVCODE, OVEXON	NM_002830	PTPN4	Salzman2013
chr13_46090278_46104915_+	hsa_circ_0006607	14638	648	Hs68_RNase, Hs68_control, K562, Hepg2, Gm12878, Bj, A549, Sknshra	None	ANNOTATED, CDS, coding, INTERNAL, OVCODE, OVEXON	NM_031431	COG3	Jeck2013, Salzman2013
chr15_67524152_67529158_-	hsa_circ_0000620	5007	462	HEK293, cd_19, Hs68_RNase, Hs68_control, Nhek, K562, Hepg2, Helas3, H1hesc, Gm12878, Ag04450, A549, Sknshra	None	ANNOTATED, CDS, coding, INTERNAL, OVCODE, OVEXON	NM_024666	AAGAB	Jeck2013, Memczak2013, Salzman2013
chr17_45668083_45682918_+	hsa_circ_0009068	14836	1000	Hs68_RNase, Hs68_control	None	ANNOTATED, CDS, coding, INTERNAL, OVCODE, OVEXON	NM_006310	NPEPPS	Jeck2013
chr16_71772845_71773244_-	hsa_circ_0040370	400	269	Nhek, K562, Hepg2, Helas3, H1hesc, Gm12878, Bj, Ag04450, A549, Sknshra, Mcf7	NA	ANNOTATED, CDS, coding, INTERNAL, OVCODE, OVEXON	NM_001030007	AP1G1	Salzman2013
chr2_169018297_169038600_-	hsa_circ_0001079	20304	420	cd_19, Hs68_RNase, Hs68_control, Nhek, H1hesc, Bj, Ag04450, A549, Sknshra	None	ANNOTATED, CDS, coding, INTERNAL, OVCODE, OVEXON	NM_013233	STK39	Jeck2013, Memczak2013, Salzman2013
chr13_50025689_50042096_+	hsa_circ_0030254	16408	682	K562, Hepg2, H1hesc, Gm12878, Ag04450, A549, Sknshra	NA	ANNOTATED, CDS, coding, INTERNAL, OVCODE, OVEXON, UTR5	NM_031915	SETDB2	Salzman2013
chr7_23015829_23023664_-	hsa_circ_0001971	7836	575	Hs68_RNase, Hs68_control, Nhek, K562, Huvec, Hepg2, Helas3, H1hesc, Gm12878, Bj, Ag04450, A549	None	ANNOTATED, CDS, coding, INTERNAL, OVCODE, OVEXON	NM_032581	FAM126A	Jeck2013, Salzman2013
chr1_180953813_180974599_-	hsa_circ_0006796	20787	656	Hs68_RNase, Hs68_control	None	ANNOTATED, CDS, coding, INTERNAL, OVCODE, OVEXON	NM_005819	STX6	Jeck2013
chr9_33960824_33973235_-	hsa_circ_0001850	12412	278	cd_19, cd_34, Hs68_RNase, Hs68_control, K562, Hepg2, Helas3, Gm12878, Bj, Ag04450, Nhek	None	ANNOTATED, CDS, coding, INTERNAL, OVCODE, OVEXON	NM_018449	UBAP2	Jeck2013, Memczak2013, Salzman2013
chr20_13604093_13610799_-	hsa_circ_0059476	6707	356	Nhek, K562, Bj	NA	ANNOTATED, CDS, coding, INTERNAL, OVCODE, OVEXON, UTR5	NM_017714	TASP1	Salzman2013
chr7_129311269_129330386_+	hsa_circ_0082309	19118	383	K562, Huvec, Hepg2, H1hesc, Gm12878, Ag04450, A549, Sknshra	NA	ANNOTATED, CDS, coding, INTERNAL, OVCODE, OVERLAPTX, OVEXON	NM_005011	NRF1	Salzman2013
chr20_34309662_34313077_-	hsa_circ_0001148	3416	409	cd_19, cd_34, Hs68_RNase, Hs68_control, K562, Hepg2, Helas3, H1hesc, Gm12878, Bj, Ag04450, Sknshra	None	ANNOTATED, CDS, coding, INTERNAL, ncRNA, OVCODE, OVEXON	NM_001242600	RBM39	Jeck2013, Memczak2013, Salzman2013
chr2_183817133_183818059_-	hsa_circ_0002092	927	448	Hs68_RNase, Hs68_control, Nhek, K562, Ag04450, A549, Sknshra	None	ANNOTATED, CDS, coding, INTERNAL, OVCODE, OVEXON	NM_205842	NCKAP1	Jeck2013, Salzman2013
chr3_127778945_127779504_+	hsa_circ_0007841	560	264	Hs68_RNase, Hs68_control, Nhek, K562, Huvec, Hepg2, Helas3, H1hesc, Gm12878, Bj, Ag04450, A549, Sknshra, Mcf7	None	ANNOTATED, CDS, coding, INTERNAL, OVCODE, OVEXON	NM_013336	SEC61A1	Jeck2013, Salzman2013
chr1_22074631_22078108_-	hsa_circ_0002166	3478	243	Hs68_RNase, Hs68_control	None	ANNOTATED, CDS, coding, INTERNAL, OVCODE, OVEXON	NM_032236	USP48	Jeck2013
chr19_1510149_1510916_-	hsa_circ_0048259	768	335	Hepg2, Helas3, Bj, Ag04450, A549, Nhek, Sknshra	NA	ALT_ACCEPTOR, CDS, coding, INTERNAL, OVCODE, OVEXON	NM_213604	ADAMTSL5	Salzman2013
chr15_76580187_76585041_-	hsa_circ_0000639	4855	265	HEK293, Hs68_RNase, Hs68_control, Nhek, K562, Huvec, Hepg2, Helas3, H1hesc, Gm12878, Bj, Ag04450, A549, Sknshra, Mcf7	None	ANNOTATED, CDS, coding, INTERNAL, OVCODE, OVEXON	NM_000126	ETFA	Jeck2013, Memczak2013, Salzman2013
chr11_119103158_119103405_+	hsa_circ_0007665	248	248	Hs68_RNase, Hs68_control	None	ANNOTATED, CDS, coding, INTERNAL, OVCODE, OVEXON	NM_005188	CBL	Jeck2013
chr7_30494753_30496658_-	hsa_circ_0079701	1906	497	Nhek, Hsmm, Ag04450	NA	ANNOTATED, CDS, coding, INTERNAL, OVCODE, OVEXON, UTR5	NM_006092	NOD1	Salzman2013
chr7_40037093_40087476_+	hsa_circ_0005485	50384	729	Hs68_RNase, Hs68_control, A549	None	ANNOTATED, CDS, coding, INTERNAL, OVCODE, OVEXON	NM_003718	CDK13	Jeck2013, Salzman2013
chr20_33027960_33030108_+	hsa_circ_0059944	2149	286	K562, H1hesc	NA	ANNOTATED, CDS, coding, INTERNAL, OVCODE, OVERLAPTX, OVEXON	NM_031483	ITCH	Salzman2013
chr6_129932678_129939997_-	hsa_circ_0006887	7320	336	Hs68_RNase, Hs68_control, Gm12878, Ag04450	None	ANNOTATED, CDS, coding, INTERNAL, OVCODE, OVEXON	NM_033515	ARHGAP18	Jeck2013, Salzman2013
chr7_128214774_128220148_+	hsa_circ_0002299	5375	1358	Hs68_RNase, Hs68_control	None	ALT_DONOR, downstream_end, ncRNA, OVEXON	TCONS_l2_00026193	TCONS_l2_00026193	Jeck2013
chr8_101716525_101717901_-	hsa_circ_0085133	1377	310	Nhek, K562, Huvec, Hepg2, Helas3, H1hesc, Gm12878, Bj, Ag04450, A549, Sknshra, Mcf7	NA	ANNOTATED, CDS, coding, INTERNAL, OVCODE, OVEXON, UTR3	NM_002568	PABPC1	Salzman2013
chr5_134508190_134509862_+	hsa_circ_0006652	1673	1673	Hs68_RNase, Hs68_control	None	INTERGENIC	None	None	Jeck2013
chr1_92798948_92846430_+	hsa_circ_0000091	47483	383	cd_19, neutr, Hs68_RNase, Hs68_control, Nhek, K562, Huvec, Hepg2, Helas3, H1hesc, Gm12878, Bj, Ag04450, A549, Sknshra	None	ANNOTATED, CDS, coding, INTERNAL, OVCODE, OVEXON	NM_024813	RPAP2	Jeck2013, Memczak2013, Salzman2013
chr4_154191487_154197282_+	hsa_circ_0005272	5796	423	Hs68_RNase, Hs68_control	None	ANNOTATED, CDS, coding, INTERNAL, OVCODE, OVEXON	NM_015271	TRIM2	Jeck2013
chr3_138289160_138290198_-	hsa_circ_0002468	1039	396	Hs68_RNase, Hs68_control	None	ANNOTATED, CDS, coding, INTERNAL, OVCODE, OVEXON	NM_024491	CEP70	Jeck2013
chr11_12901255_12923660_+	hsa_circ_0003015	22406	543	Hs68_RNase, Hs68_control	None	ANNOTATED, CDS, coding, INTERNAL, OVCODE, OVEXON	NM_021961	TEAD1	Jeck2013
chr13_20576990_20580726_+	hsa_circ_0005966	3737	665	Hs68_RNase, Hs68_control	None	ANNOTATED, CDS, coding, INTERNAL, OVCODE, OVEXON	NM_003453	ZMYM2	Jeck2013
chr1_145592633_145595220_-	hsa_circ_0007755	2588	441	Hs68_RNase, Hs68_control	None	ALT_DONOR, CDS, coding, INTERNAL, OVCODE, OVEXON, UTR3	NM_006468	POLR3C	Jeck2013
chr15_65771218_65772737_-	hsa_circ_0035901	1520	338	H1hesc, Sknshra	NA	ANNOTATED, CDS, coding, INTERNAL, OVCODE, OVEXON	NM_130434	DPP8	Salzman2013
chr2_101666863_101676001_-	hsa_circ_0003160	9139	589	Hs68_RNase, Hs68_control, Huvec, Hepg2, Helas3, H1hesc, Bj, A549	None	ANNOTATED, CDS, coding, INTERNAL, OVCODE, OVEXON	NM_001102426	TBC1D8	Jeck2013, Salzman2013
chr14_61275043_61285565_+	hsa_circ_0005818	10523	371	Hs68_RNase, Hs68_control	None	ANNOTATED, CDS, coding, INTERNAL, OVCODE, OVEXON	NM_002431	MNAT1	Jeck2013
chr17_11958206_12032604_+	hsa_circ_0042094	74399	925	K562, Hepg2, Sknshra	NA	ANNOTATED, CDS, coding, INTERNAL, OVCODE, OVERLAPTX, OVEXON	NM_003010	MAP2K4	Salzman2013
chr3_27490142_27493989_-	hsa_circ_0001277	3848	229	cd_19, Hs68_RNase, Hs68_control, Bj, Ag04450	None	ANNOTATED, CDS, coding, INTERNAL, OVCODE, OVEXON	NM_003615	SLC4A7	Jeck2013, Memczak2013, Salzman2013
chr19_6702138_6702590_-	hsa_circ_0002130	453	195	Hs68_RNase, Hs68_control	None	ANNOTATED, CDS, coding, INTERNAL, OVCODE, OVEXON	NM_000064	C3	Jeck2013
chr15_80390758_80415142_+	hsa_circ_0000642	24385	544	cd_34, Hs68_RNase, Hs68_control, Nhek, K562, Hepg2, Helas3, H1hesc, Gm12878, Bj, Ag04450, A549, Sknshra	None	ANNOTATED, CDS, coding, INTERNAL, OVCODE, OVEXON, UTR5	NM_001242916	ZFAND6	Jeck2013, Memczak2013, Salzman2013
chr14_50130033_50141145_-	hsa_circ_0008002	11113	510	Hs68_RNase, Hs68_control, Nhek, K562, Huvec, Hepg2, Helas3, Gm12878, Bj, Ag04450, A549, Sknshra	None	ANNOTATED, CDS, coding, INTERNAL, OVCODE, OVEXON	NM_002692	POLE2	Jeck2013, Salzman2013
chr5_68467097_68470236_+	hsa_circ_0072758	3140	342	K562, Huvec, Hepg2, Gm12878, Bj, Ag04450, A549, Nhek	NA	ANNOTATED, CDS, coding, INTERNAL, OVCODE, OVEXON	NM_031966	CCNB1	Salzman2013
chr3_67546222_67548719_-	hsa_circ_0003060	2498	305	Hs68_RNase, Hs68_control, Nhek, K562, Huvec, Hepg2, Helas3, H1hesc, Gm12878, Bj, Ag04450, A549, Sknshra	None	ANNOTATED, CDS, coding, INTERNAL, OVCODE, OVEXON	NM_003848	SUCLG2	Jeck2013, Salzman2013
chr11_108098322_108100050_+	hsa_circ_0024193	1729	361	H1hesc, Ag04450	NA	ANNOTATED, CDS, coding, INTERNAL, OVCODE, OVEXON, UTR5	NM_000051	ATM	Salzman2013
chr9_88920107_88924932_-	hsa_circ_0001869	4826	508	cd_19, Hs68_RNase, Hs68_control, Huvec, Hepg2, H1hesc, Gm12878, Bj, Ag04450, A549, Nhek, Sknshra	None	ANNOTATED, CDS, coding, INTERNAL, OVCODE, OVEXON	NM_001185074	ZCCHC6	Jeck2013, Memczak2013, Salzman2013
chr19_34921481_34925873_+	hsa_circ_0005325	4393	321	Hs68_RNase, Hs68_control, Nhek, K562, Huvec, Hepg2, Helas3, H1hesc, Gm12878, Bj, Ag04450, A549, Sknshra, Mcf7	None	ANNOTATED, CDS, coding, INTERNAL, OVCODE, OVEXON	NM_005499	UBA2	Jeck2013, Salzman2013
chr22_47370186_47433094_+	hsa_circ_0002406	62909	314	Hs68_RNase, Hs68_control, Hepg2, H1hesc, Gm12878, Bj, Ag04450, A549, Sknshra, Mcf7	None	ANNOTATED, CDS, coding, INTERNAL, OVCODE, OVEXON	NM_014346	TBC1D22A	Jeck2013, Salzman2013
chr1_227192695_227204751_-	hsa_circ_0016733	12057	360	K562, Helas3, H1hesc, A549, Sknshra	NA	ANNOTATED, CDS, coding, INTERNAL, OVCODE, OVEXON	NM_003607	CDC42BPA	Salzman2013
chr1_70766447_70781249_-	hsa_circ_0003566	14803	344	Hs68_RNase, Hs68_control, K562, H1hesc, Gm12878, Bj	None	ANNOTATED, CDS, coding, INTERNAL, OVCODE, OVEXON	NM_030816	ANKRD13C	Jeck2013, Salzman2013
chr9_36594625_36607670_+	hsa_circ_0009127	13046	405	Hs68_RNase, Hs68_control, K562, Bj	None	ANNOTATED, CDS, coding, INTERNAL, OVCODE, OVEXON	NM_014791	MELK	Jeck2013, Salzman2013
chr3_20017093_20017661_+	hsa_circ_0064563	569	275	K562	NA	ANNOTATED, CDS, coding, INTERNAL, OVCODE, OVEXON	NM_004162	RAB5A	Salzman2013
chr17_4856090_4857140_+	hsa_circ_0041638	1051	359	Gm12878, Sknshra	NA	ANNOTATED, CDS, coding, INTERNAL, OVCODE, OVEXON	NM_001976	ENO3	Salzman2013
chr3_129599152_129599402_-	hsa_circ_0001340	251	251	cd_34, Hs68_RNase, Hs68_control	None	ANNOTATED, coding, OVEXON, UTR5	NM_001017395	TMCC1	Jeck2013, Memczak2013
chr7_105103068_105108910_-	hsa_circ_0081844	5843	359	K562, Gm12878, Ag04450, A549	NA	ANNOTATED, CDS, coding, INTERNAL, OVCODE, OVEXON	NM_019042	PUS7	Salzman2013
chr3_137928659_137942575_+	hsa_circ_0007348	13917	390	Hs68_RNase, Hs68_control, Nhek, K562, Hepg2, Helas3, H1hesc, Gm12878, Bj, Ag04450, A549, Nhlf, Sknshra, Mcf7	None	ANNOTATED, CDS, coding, INTERNAL, OVCODE, OVEXON	NM_015396	ARMC8	Jeck2013, Salzman2013
chr12_46622936_46637097_-	hsa_circ_0000396	14162	522	HEK293, cd_19, Nhek, K562, Huvec, Hsmm, Hepg2, Helas3, H1hesc, Gm12878, Bj, Ag04450, A549, Sknshra, Mcf7	LINE	ANNOTATED, CDS, coding, INTERNAL, UTR5	NM_030674	SLC38A1	Memczak2013, Salzman2013
chr16_71748415_71748704_-	hsa_circ_0040364	290	290	Nhek, K562, Hepg2, Helas3, H1hesc, Bj, Ag04450, A549, Sknshra	NA	ANNOTATED, CDS, coding, OVCODE, OVEXON, UTR5	NM_015020	PHLPP2	Salzman2013
chr14_39815108_39818181_+	hsa_circ_0006951	3074	417	Hs68_RNase, Hs68_control, Hepg2, Helas3, H1hesc, Gm12878, A549	None	ANNOTATED, CDS, coding, INTERNAL, OVCODE, OVEXON	NM_001247989	CTAGE5	Jeck2013, Salzman2013
chr18_21095820_21099138_+	hsa_circ_0008503	3319	441	Hs68_RNase, Hs68_control, K562	None	ANNOTATED, CDS, coding, INTERNAL, OVCODE, OVEXON	NM_013326	C18orf8	Jeck2013, Salzman2013
chr7_6465619_6472590_-	hsa_circ_0079363	6972	378	Nhek, Huvec, Hsmm, Hepg2, H1hesc, Bj, Ag04450, Mcf7	NA	ANNOTATED, CDS, coding, INTERNAL, OVCODE, OVEXON	NM_139179	DAGLB	Salzman2013
chr19_41884186_41884424_+	hsa_circ_0051220	239	239	Nhek, K562, Huvec, Hepg2, Helas3, H1hesc, Gm12878, Bj, Ag04450, A549, Nhlf, Sknshra, Mcf7	NA	ANNOTATED, CDS, coding, INTERNAL, OVCODE, OVERLAPTX, OVEXON, UTR5	NM_001098821	TMEM91	Salzman2013
chr1_15970017_15976318_+	hsa_circ_0010058	6302	233	K562	NA	ANNOTATED, CDS, coding, INTERNAL, OVCODE, OVEXON	NM_032341	DDI2	Salzman2013
chr1_44773982_44785416_-	hsa_circ_0012144	11435	269	Nhek, K562, Huvec, Hepg2, Helas3, H1hesc, Gm12878, Bj, Ag04450, A549, Sknshra, Mcf7	NA	ANNOTATED, CDS, coding, INTERNAL, OVCODE, OVERLAPTX, OVEXON	NM_024066	ERI3	Salzman2013
chr2_38812786_38818790_-	hsa_circ_0054144	6005	357	K562, Hepg2, Helas3, H1hesc, Gm12878, Bj, Ag04450, A549, Sknshra	NA	ANNOTATED, CDS, coding, INTERNAL, OVCODE, OVEXON	NM_138394	HNRPLL	Salzman2013
chr1_23397718_23398690_+	hsa_circ_0010835	973	209	K562	NA	ANNOTATED, CDS, coding, INTERNAL, OVCODE, OVERLAPTX, OVEXON	NM_001009999	KDM1A	Salzman2013
chr11_32118690_32120074_+	hsa_circ_0007245	1385	373	Hs68_RNase, Hs68_control, Bj, Ag04450	None	ANNOTATED, CDS, coding, INTERNAL, OVCODE, OVEXON	NM_002901	RCN1	Jeck2013, Salzman2013
chr1_203676137_203677232_+	hsa_circ_0007167	1096	458	Hs68_RNase, Hs68_control, Nhek, K562, Huvec, Hepg2, Helas3, H1hesc, Bj, Ag04450, Sknshra	None	ANNOTATED, CDS, coding, INTERNAL, OVCODE, OVEXON	NM_001001396	ATP2B4	Jeck2013, Salzman2013
chr17_62817885_62818511_-	hsa_circ_0045334	627	426	Nhek, K562, Huvec, Hsmm, Hepg2, Helas3, H1hesc, Gm12878, Bj, Ag04450, A549, Nhlf, Sknshra, Mcf7	NA	ANNOTATED, INTERNAL, ncRNA, OVEXON	NR_024386	PLEKHM1P	Salzman2013
chr15_75219107_75221573_-	hsa_circ_0005725	2467	239	Hs68_RNase, Hs68_control	None	ANNOTATED, CDS, coding, INTERNAL, OVCODE, OVEXON	NM_004255	COX5A	Jeck2013
chr6_17675136_17676001_-	hsa_circ_0075740	866	518	K562, H1hesc, A549	NA	ANNOTATED, CDS, coding, INTERNAL, OVCODE, OVEXON	NM_005124	NUP153	Salzman2013
chr12_12672796_12674397_-	hsa_circ_0003855	1602	732	Hs68_RNase, Hs68_control, K562, Hepg2, Helas3, H1hesc, Gm12878, Bj, A549, Sknshra	None	ANNOTATED, CDS, coding, INTERNAL, OVCODE, OVEXON, UTR5	NM_030640	DUSP16	Jeck2013, Salzman2013
chr16_74694830_74695349_-	hsa_circ_0004172	520	520	Hs68_RNase, Hs68_control, K562, Huvec, Hepg2, Helas3, Gm12878, Bj, Ag04450, A549, Mcf7	None	ANNOTATED, CDS, coding, INTERNAL, OVCODE, OVEXON, UTR5	NM_018124	RFWD3	Jeck2013, Salzman2013
chr15_65994643_65995346_-	hsa_circ_0007072	704	343	Hs68_RNase, Hs68_control, Gm12878, Ag04450	None	ANNOTATED, CDS, coding, INTERNAL, OVCODE, OVEXON	NM_001144823	DENND4A	Jeck2013, Salzman2013
chr16_89962398_89967202_+	hsa_circ_0041103	4805	453	Nhek, K562, Huvec, Hepg2, Helas3, H1hesc, Gm12878, Bj, Ag04450, A549, Sknshra, Mcf7	NA	ANNOTATED, CDS, coding, INTERNAL, OVCODE, OVEXON	NM_014972	TCF25	Salzman2013
chr19_5032877_5047680_+	hsa_circ_0004272	14804	651	Hs68_RNase, Hs68_control, K562, Hepg2, H1hesc, Bj, Ag04450, Sknshra	None	ANNOTATED, CDS, coding, INTERNAL, OVCODE, OVEXON, UTR5	NM_015015	KDM4B	Jeck2013, Salzman2013
chr2_32768308_32774548_+	hsa_circ_0005544	6241	853	Hs68_RNase, Hs68_control	None	ANNOTATED, CDS, coding, INTERNAL, OVCODE, OVEXON	NM_016252	BIRC6	Jeck2013
chr6_90556281_90566918_+	hsa_circ_0001621	10638	444	cd_19, Hs68_RNase, Hs68_control, K562	None	ANNOTATED, CDS, coding, INTERNAL, OVCODE, OVEXON, UTR5	NM_001137668	CASP8AP2	Jeck2013, Memczak2013, Salzman2013
chr8_141357856_141370292_-	hsa_circ_0001826	12437	12437	cd_19, Hs68_RNase, Hs68_control	LTR	ALT_DONOR, CDS, coding, INTERNAL, intronic, OVCODE, OVEXON	NM_031466	TRAPPC9	Jeck2013, Memczak2013
chr2_236626201_236659132_+	hsa_circ_0058794	32932	451	K562, Helas3, H1hesc, Ag04450, A549	NA	ANNOTATED, CDS, coding, INTERNAL, OVCODE, OVERLAPTX, OVEXON	NM_001037131	AGAP1	Salzman2013
chr4_1219148_1232125_-	hsa_circ_0068837	12978	507	Hepg2, H1hesc, Gm12878	NA	ANNOTATED, CDS, coding, INTERNAL, OVCODE, OVEXON	NM_001012614	CTBP1	Salzman2013
chr3_50142510_50143142_+	hsa_circ_0003795	633	227	Hs68_RNase, Hs68_control, Nhek, K562, Hepg2, Helas3, H1hesc, Gm12878, Bj, Ag04450, A549, Sknshra	None	ANNOTATED, CDS, coding, INTERNAL, OVCODE, OVEXON	NM_005778	RBM5	Jeck2013, Salzman2013
chr3_167422630_167443261_-	hsa_circ_0067865	20632	339	K562	NA	ANNOTATED, CDS, coding, INTERNAL, OVCODE, OVEXON, UTR5	NM_145859	PDCD10	Salzman2013
chr7_50771518_50823753_-	hsa_circ_0080213	52236	258	Ag04450, A549	NA	ANNOTATED, coding, INTERNAL, OVCODE, OVEXON, UTR5	NM_001001555	GRB10	Salzman2013
chr19_48922491_48923071_+	hsa_circ_0051749	581	356	K562, H1hesc, A549	NA	ANNOTATED, CDS, coding, INTERNAL, OVCODE, OVEXON	NM_000836	GRIN2D	Salzman2013
chr12_53670404_53671744_+	hsa_circ_0008229	1341	664	Hs68_RNase, Hs68_control, Gm12878	None	ANNOTATED, CDS, coding, INTERNAL, OVCODE, OVEXON	NM_012291	ESPL1	Jeck2013, Salzman2013
chr12_50384467_50386438_-	hsa_circ_0006143	1972	484	Hs68_RNase, Hs68_control, K562, Gm12878, Bj, Ag04450, A549, Mcf7	None	ANNOTATED, CDS, coding, INTERNAL, OVCODE, OVEXON	NM_001126103	RACGAP1	Jeck2013, Salzman2013
chr2_191765290_191789319_+	hsa_circ_0001085	24030	643	cd_19, cd_34, neutr, Nhek, K562, Gm12878, Bj, Ag04450	None	ANNOTATED, CDS, coding, INTERNAL	NM_014905	GLS	Memczak2013, Salzman2013
chr12_112371690_112381173_-	hsa_circ_0004206	9484	523	Hs68_RNase, Hs68_control, Nhek, K562, Huvec, Hepg2, Helas3, H1hesc, Gm12878, Bj, Ag04450, A549, Sknshra	None	ANNOTATED, CDS, coding, INTERNAL, OVCODE, OVEXON	NM_001193531	TMEM116	Jeck2013, Salzman2013
chr16_70566382_70578436_+	hsa_circ_0005330	12055	759	Hs68_RNase, Hs68_control	None	ANNOTATED, CDS, coding, INTERNAL, OVCODE, OVEXON	NM_012426	SF3B3	Jeck2013
chr17_71199139_71199932_+	hsa_circ_0045534	794	309	K562, Huvec, Sknshra	NA	ANNOTATED, CDS, coding, INTERNAL, OVCODE, OVERLAPTX, OVEXON	NM_018714	COG1	Salzman2013
chr1_39696854_39723700_+	hsa_circ_0008939	26847	323	Hs68_RNase, Hs68_control, Nhek, K562, Huvec, H1hesc, Ag04450, A549	None	ANNOTATED, CDS, coding, INTERNAL, OVCODE, OVEXON	NM_012090	MACF1	Jeck2013, Salzman2013
chr8_48508373_48511758_+	hsa_circ_0004511	3386	447	Hs68_RNase, Hs68_control, K562, Huvec, Helas3, Gm12878, Ag04450, A549, Nhlf, Sknshra	None	ANNOTATED, CDS, coding, INTERNAL, OVCODE, OVEXON	NM_001080394	KIAA0146	Jeck2013, Salzman2013
chr15_76584772_76588078_-	hsa_circ_0003620	3307	312	Hs68_RNase, Hs68_control, Nhek, K562, Huvec, Hepg2, Helas3, H1hesc, Gm12878, Bj, Ag04450, A549, Sknshra, Mcf7	None	ANNOTATED, CDS, coding, INTERNAL, OVCODE, OVEXON	NM_000126	ETFA	Jeck2013, Salzman2013
chr3_47770515_47814426_-	hsa_circ_0005435	43912	451	Hs68_RNase, Hs68_control, Nhek, K562, Hepg2, Helas3, H1hesc, Gm12878, Bj, Ag04450, A549, Sknshra	None	ANNOTATED, CDS, coding, INTERNAL, OVCODE, OVEXON	NM_003074	SMARCC1	Jeck2013, Salzman2013
chr17_57125044_57134415_-	hsa_circ_0003005	9372	648	Hs68_RNase, Hs68_control, Mcf7	None	ANNOTATED, CDS, coding, INTERNAL, OVCODE, OVEXON	NM_015294	TRIM37	Jeck2013, Salzman2013
chr13_52971367_52972329_-	hsa_circ_0008776	963	963	Hs68_RNase, Hs68_control, Nhek, Huvec, Hsmm, H1hesc, Bj, Ag04450, Sknshra	None	ANNOTATED, CDS, coding, INTERNAL, OVCODE, OVEXON	NM_018676	THSD1	Jeck2013, Salzman2013
chr11_110134685_110135599_-	hsa_circ_0002773	915	371	Hs68_RNase, Hs68_control, K562, Hepg2, Helas3, Gm12878, Bj, Ag04450, A549, Nhek, Mcf7	None	ANNOTATED, CDS, coding, INTERNAL, OVCODE, OVEXON	NM_002906	RDX	Jeck2013, Salzman2013
chr1_85816098_85824530_-	hsa_circ_0004607	8433	294	Hs68_RNase, Hs68_control	None	ANNOTATED, CDS, coding, INTERNAL, OVCODE, OVEXON, UTR5	NM_001134445	DDAH1	Jeck2013
chr6_43514308_43516197_-	hsa_circ_0076560	1890	482	K562, Helas3, Gm12878, Ag04450, A549	NA	ANNOTATED, CDS, coding, INTERNAL, OVCODE, OVEXON	NM_020750	XPO5	Salzman2013
chr11_3712577_3716836_-	hsa_circ_0006430	4260	445	Hs68_RNase, Hs68_control, K562, Hepg2, Helas3, H1hesc, Gm12878, Ag04450, A549, Nhek	None	ANNOTATED, CDS, coding, INTERNAL, OVCODE, OVEXON	NM_016320	NUP98	Jeck2013, Salzman2013
chr12_124904503_124915333_-	hsa_circ_0029308	10831	600	K562, Hsmm, Gm12878, Bj, Ag04450, Sknshra	NA	ANNOTATED, CDS, coding, INTERNAL, OVCODE, OVEXON	NM_006312	NCOR2	Salzman2013
chr6_101246589_101253756_-	hsa_circ_0077495	7168	594	K562, Hepg2, Helas3, H1hesc, Gm12878, Bj, Ag04450, A549, Nhek, Sknshra	NA	ANNOTATED, CDS, coding, INTERNAL, OVCODE, OVEXON	NM_006828	ASCC3	Salzman2013
chr11_72695133_72700142_-	hsa_circ_0005918	5010	318	Hs68_RNase, Hs68_control, K562, Huvec, Helas3, Gm12878, Bj, Ag04450	None	ANNOTATED, CDS, coding, INTERNAL, OVCODE, OVEXON	NM_014824	FCHSD2	Jeck2013, Salzman2013
chr7_35903162_35913385_+	hsa_circ_0002217	10224	343	Hs68_RNase, Hs68_control	None	ANNOTATED, CDS, coding, INTERNAL, OVCODE, OVEXON	NM_001788	SEPT7	Jeck2013
chr5_170626674_170648844_+	hsa_circ_0074994	22171	384	A549	NA	ANNOTATED, CDS, coding, INTERNAL, OVCODE, OVERLAPTX, OVEXON	NM_022897	RANBP17	Salzman2013
chr3_107429299_107451870_+	hsa_circ_0001325	22572	678	cd_19, Hs68_RNase, Hs68_control, Nhek, Huvec, Hepg2, Helas3, H1hesc, Gm12878, Ag04450, A549, Mcf7	None	ANNOTATED, CDS, coding, INTERNAL, OVCODE, OVEXON, UTR5	NM_020235	BBX	Jeck2013, Memczak2013, Salzman2013
chr17_49294695_49302570_-	hsa_circ_0003871	7876	534	Hs68_RNase, Hs68_control, K562, Hepg2, Helas3, Gm12878, Bj, Ag04450, Sknshra	None	ANNOTATED, CDS, coding, INTERNAL, OVCODE, OVEXON, UTR5	NM_017643	MBTD1	Jeck2013, Salzman2013
chr1_70758071_70781249_-	hsa_circ_0000085	23179	638	cd_19, K562, Hsmm, Bj, Sknshra	None	ANNOTATED, CDS, coding, INTERNAL	NM_030816	ANKRD13C	Memczak2013, Salzman2013
chr3_33725851_33738425_-	hsa_circ_0001280	12575	449	cd_19, cd_34, Hs68_RNase, Hs68_control, K562, H1hesc, Ag04450, A549, Sknshra	None	ANNOTATED, CDS, coding, INTERNAL, OVCODE, OVEXON	NM_015097	CLASP2	Jeck2013, Memczak2013, Salzman2013
chr1_78268955_78272786_+	hsa_circ_0013007	3832	264	K562, Gm12878, Sknshra	NA	ANNOTATED, CDS, coding, INTERNAL, OVCODE, OVEXON	NM_198549	FAM73A	Salzman2013
chr16_4382216_4383520_+	hsa_circ_0005692	1305	411	Hs68_RNase, Hs68_control, Nhek, K562, Huvec, Hsmm, Hepg2, Helas3, H1hesc, Gm12878, Bj, Ag04450, A549, Nhlf, Sknshra, Mcf7	None	ALT_ACCEPTOR, CDS, coding, OVCODE, OVEXON, upstream_start, UTR5	NM_032575	GLIS2	Jeck2013, Salzman2013
chr16_142594_143323_-	hsa_circ_0037127	730	237	Nhek, K562, Huvec, Hsmm, Hepg2, Helas3, Gm12878, A549, Sknshra	NA	ANNOTATED, CDS, coding, INTERNAL, OVCODE, OVERLAPTX, OVEXON	NM_001243249	NPRL3	Salzman2013
chr9_100780571_100788733_+	hsa_circ_0004036	8163	8163	Hs68_RNase, Hs68_control	SINE	INTERGENIC	None	None	Jeck2013
chr1_178745817_178754742_+	hsa_circ_0000162	8926	296	cd_19, Ag04450	None	ANNOTATED, CDS, coding, INTERNAL, UTR5	NM_152663	RALGPS2	Memczak2013, Salzman2013
chr14_102659800_102661457_+	hsa_circ_0000569	1658	235	cd_19, Hs68_RNase, Hs68_control	SINE	ANNOTATED, INTERNAL, ncRNA, OVCODE, OVEXON	NR_038354	WDR20	Jeck2013, Memczak2013
chr17_5235244_5235447_+	hsa_circ_0006806	204	204	Hs68_RNase, Hs68_control, K562, Ag04450, A549	None	ANNOTATED, CDS, coding, INTERNAL, OVCODE, OVEXON	NM_004703	RABEP1	Jeck2013, Salzman2013
chr4_3088666_3109150_+	hsa_circ_0001392	20485	484	cd_19, Hs68_RNase, Hs68_control	None	ANNOTATED, CDS, coding, INTERNAL, OVCODE, OVEXON	NM_002111	HTT	Jeck2013, Memczak2013
chr2_29356521_29368233_+	hsa_circ_0006908	11713	654	Hs68_RNase, Hs68_control, Helas3	None	ANNOTATED, CDS, coding, INTERNAL, OVCODE, OVEXON	NM_024692	CLIP4	Jeck2013, Salzman2013
chr14_51107468_51111732_-	hsa_circ_0007101	4265	415	Hs68_RNase, Hs68_control	None	ANNOTATED, CDS, coding, INTERNAL, OVCODE, OVEXON	NM_021818	SAV1	Jeck2013
chr10_90653628_90665417_+	hsa_circ_0008629	11790	8086	Hs68_RNase, Hs68_control	None	ALT_ACCEPTOR, CDS, coding, INTERNAL, intronic, OVCODE, OVEXON, UTR5	NM_020799	STAMBPL1	Jeck2013
chr15_62221700_62223458_-	hsa_circ_0004456	1759	418	Hs68_RNase, Hs68_control	None	ANNOTATED, CDS, coding, INTERNAL, OVCODE, OVEXON	NM_001018088	VPS13C	Jeck2013
chr15_50935537_50955243_-	hsa_circ_0004951	19707	532	Hs68_RNase, Hs68_control, K562, Helas3, H1hesc, Gm12878, Bj, Ag04450, A549	None	ANNOTATED, CDS, coding, INTERNAL, OVCODE, OVEXON	NM_017672	TRPM7	Jeck2013, Salzman2013
chr13_42385361_42407667_-	hsa_circ_0006049	22307	638	Hs68_RNase, Hs68_control, K562, Huvec, Hepg2, Helas3, H1hesc, Gm12878, Bj, Ag04450, A549, Sknshra, Mcf7	None	ANNOTATED, CDS, coding, INTERNAL, OVCODE, OVEXON	NM_015058	KIAA0564	Jeck2013, Salzman2013
chr13_99890681_99970323_+	hsa_circ_0030721	79643	530	Hsmm, Helas3, Bj, A549	NA	ANNOTATED, INTERNAL, ncRNA, OVCODE, OVERLAPTX, OVEXON	NR_026644	UBAC2	Salzman2013
chr12_6618883_6620418_+	hsa_circ_0025148	1536	460	K562, Gm12878, Ag04450	NA	ANNOTATED, CDS, coding, INTERNAL, OVCODE, OVEXON	NM_014865	NCAPD2	Salzman2013
chr1_47761437_47767420_-	hsa_circ_0002632	5984	520	Hs68_RNase, Hs68_control, K562, H1hesc, Gm12878	None	ANNOTATED, CDS, coding, INTERNAL, OVCODE, OVEXON	NM_001048166	STIL	Jeck2013, Salzman2013
chr10_99502851_99504672_+	hsa_circ_0003168	1822	258	Hs68_RNase, Hs68_control, Nhek, K562, Gm12878, Ag04450, Sknshra	None	ANNOTATED, CDS, coding, INTERNAL, OVCODE, OVEXON	NM_144588	ZFYVE27	Jeck2013, Salzman2013
chr5_96058343_96066564_+	hsa_circ_0007003	8222	420	Hs68_RNase, Hs68_control, K562, Helas3, H1hesc, A549, Sknshra, Mcf7	None	ANNOTATED, CDS, coding, INTERNAL, OVCODE, OVEXON, UTR5	NM_001190442	CAST	Jeck2013, Salzman2013
chr11_107673727_107677602_-	hsa_circ_0024165	3876	525	Gm12878, Nhek	NA	ANNOTATED, CDS, coding, INTERNAL, OVCODE, OVEXON	NM_017515	SLC35F2	Salzman2013
chr2_175976296_175986268_-	hsa_circ_0007967	9973	726	Hs68_RNase, Hs68_control, K562, Hepg2, Helas3, H1hesc, Gm12878, Ag04450, A549, Sknshra	None	ANNOTATED, CDS, coding, INTERNAL, OVCODE, OVEXON	NM_001880	ATF2	Jeck2013, Salzman2013
chr2_63711738_63720074_-	hsa_circ_0005762	8337	309	Hs68_RNase, Hs68_control, Hepg2, H1hesc, Gm12878, Ag04450	None	ANNOTATED, CDS, coding, INTERNAL, OVCODE, OVEXON	NM_015910	WDPCP	Jeck2013, Salzman2013
chr9_95018962_95032265_-	hsa_circ_0006702	13304	932	Hs68_RNase, Hs68_control, K562, Hepg2, Helas3, H1hesc, Gm12878, Bj, Ag04450, A549, Nhek, Sknshra	None	ANNOTATED, CDS, coding, INTERNAL, OVCODE, OVEXON	NM_013417	IARS	Jeck2013, Salzman2013
chr16_3790400_3801807_-	hsa_circ_0037655	11408	435	Huvec	NA	ANNOTATED, CDS, coding, INTERNAL, OVCODE, OVEXON	NM_004380	CREBBP	Salzman2013
chr13_21305980_21306260_-	hsa_circ_0003285	281	281	Hs68_RNase, Hs68_control, Nhek, K562, Huvec, Hepg2, Helas3, Gm12878, Bj, Ag04450, A549, Sknshra, Mcf7	None	ANNOTATED, CDS, coding, INTERNAL, OVCODE, OVEXON	NM_174928	N6AMT2	Jeck2013, Salzman2013
chr20_21321359_21327188_+	hsa_circ_0002985	5830	387	Hs68_RNase, Hs68_control, K562, H1hesc, Gm12878, Ag04450, Sknshra	None	ANNOTATED, CDS, coding, INTERNAL, OVCODE, OVEXON	NM_012255	XRN2	Jeck2013, Salzman2013
chr12_12788711_12788908_+	hsa_circ_0002873	198	198	Hs68_RNase, Hs68_control	None	ANNOTATED, CDS, coding, INTERNAL, OVCODE, OVEXON	NM_001310	CREBL2	Jeck2013
chrX_24839569_24861794_+	hsa_circ_0090165	22226	618	K562, Hepg2, Helas3, A549, Mcf7	NA	ANNOTATED, CDS, coding, INTERNAL, OVCODE, OVERLAPTX, OVEXON	NM_016937	POLA1	Salzman2013
chr6_129950498_129955250_-	hsa_circ_0005176	4753	234	Hs68_RNase, Hs68_control	None	ANNOTATED, CDS, coding, INTERNAL, OVCODE, OVEXON	NM_033515	ARHGAP18	Jeck2013
chr21_47734630_47735461_-	hsa_circ_0002792	832	239	Hs68_RNase, Hs68_control, Hepg2, Helas3, Ag04450	None	ANNOTATED, CDS, coding, INTERNAL, OVCODE, OVEXON	NM_058180	C21orf58	Jeck2013, Salzman2013
chr4_109576720_109578803_+	hsa_circ_0004700	2084	292	Hs68_RNase, Hs68_control	None	ANNOTATED, CDS, coding, INTERNAL, OVCODE, OVEXON	NM_021227	OSTC	Jeck2013
chr8_42256230_42260979_+	hsa_circ_0084119	4750	585	K562, Huvec, Gm12878, Bj, Ag04450	NA	ANNOTATED, CDS, coding, INTERNAL, OVCODE, OVEXON	NM_001135694	VDAC3	Salzman2013
chr5_6737623_6746540_+	hsa_circ_0008903	8918	743	Hs68_RNase, Hs68_control, K562, Hepg2, Helas3, Ag04450, A549	None	ANNOTATED, CDS, coding, INTERNAL, OVCODE, OVEXON, UTR5	NM_006999	PAPD7	Jeck2013, Salzman2013
chr1_155695173_155695810_+	hsa_circ_0014614	638	202	Nhek, K562, Huvec, Hepg2, Helas3, H1hesc, Gm12878, Bj, Ag04450, A549, Sknshra	NA	ANNOTATED, CDS, coding, INTERNAL, OVCODE, OVEXON	NM_001199849	DAP3	Salzman2013
chr16_22260076_22262643_+	hsa_circ_0008284	2568	271	Hs68_RNase, Hs68_control, K562, Huvec, Hsmm, H1hesc, Gm12878, Bj, Ag04450, Sknshra, Mcf7	None	ANNOTATED, CDS, coding, INTERNAL, OVCODE, OVEXON	NM_013302	EEF2K	Jeck2013, Salzman2013
chr12_129293333_129299615_-	hsa_circ_0006689	6283	712	Hs68_RNase, Hs68_control, Nhek, K562, Huvec, Hepg2, Helas3, H1hesc, Gm12878, Bj, Ag04450, A549, Nhlf, Sknshra, Mcf7	None	ANNOTATED, CDS, coding, INTERNAL, OVCODE, OVEXON	NM_145648	SLC15A4	Jeck2013, Salzman2013
chr3_136035783_136047699_+	hsa_circ_0067464	11917	532	Nhek, Gm12878, A549	NA	ANNOTATED, CDS, coding, INTERNAL, OVCODE, OVEXON	NM_001178014	PCCB	Salzman2013
chr10_22002701_22016857_+	hsa_circ_0007084	14157	364	Hs68_RNase, Hs68_control, K562, Huvec	None	ANNOTATED, CDS, coding, INTERNAL, OVCODE, OVEXON	NM_004641	MLLT10	Jeck2013, Salzman2013
chr19_14568843_14569187_+	hsa_circ_0008950	345	254	Hs68_RNase, Hs68_control, K562, H1hesc, Gm12878, Bj, A549	None	ANNOTATED, CDS, coding, INTERNAL, OVCODE, OVEXON	NM_002741	PKN1	Jeck2013, Salzman2013
chr12_133428204_133430159_-	hsa_circ_0029589	1956	263	Nhek, K562, Huvec, Hepg2, H1hesc, Gm12878, Ag04450, A549, Mcf7	NA	ANNOTATED, CDS, coding, INTERNAL, OVCODE, OVEXON	NM_001161344	CHFR	Salzman2013
chr7_72193790_72209578_-	hsa_circ_0003123	15789	229	Hs68_RNase, Hs68_control, Nhek, K562, H1hesc, Gm12878, Ag04450, A549, Sknshra	None	ANNOTATED, CDS, coding, INTERNAL, OVCODE, OVEXON	NM_001145440	TYW1B	Jeck2013, Salzman2013
chr9_133364720_133370410_+	hsa_circ_0089107	5691	289	Hepg2, Helas3, H1hesc	NA	ANNOTATED, CDS, coding, INTERNAL, OVCODE, OVERLAPTX, OVEXON	NM_000050	ASS1	Salzman2013
chr14_76198681_76201632_+	hsa_circ_0008187	2952	239	Hs68_RNase, Hs68_control, K562, Hepg2, Helas3, Bj, A549, Sknshra, Mcf7	None	ANNOTATED, CDS, coding, INTERNAL, OVCODE, OVEXON	NM_015072	TTLL5	Jeck2013, Salzman2013
chr1_185183639_185200840_+	hsa_circ_0004689	17202	469	Hs68_RNase, Hs68_control, Nhek, K562, Gm12878, Sknshra	None	ANNOTATED, CDS, coding, INTERNAL, OVCODE, OVEXON	NM_017673	SWT1	Jeck2013, Salzman2013
chr17_986760_1003975_-	hsa_circ_0005786	17216	393	Hs68_RNase, Hs68_control, Gm12878, Ag04450	None	ANNOTATED, CDS, coding, INTERNAL, OVCODE, OVEXON	NM_001159746	ABR	Jeck2013, Salzman2013
chr18_76886267_76914555_+	hsa_circ_0007134	28289	220	Hs68_RNase, Hs68_control, K562, Huvec, H1hesc, Ag04450, A549	None	ANNOTATED, CDS, coding, INTERNAL, OVCODE, OVEXON	NM_198531	ATP9B	Jeck2013, Salzman2013
chr10_134421419_134523960_+	hsa_circ_0020538	102542	572	H1hesc, Gm12878	Simple_repeat	ANNOTATED, CDS, coding, INTERNAL, OVCODE, OVERLAPTX, OVEXON	NM_005539	INPP5A	Salzman2013
chr14_71209068_71209308_-	hsa_circ_0032377	241	241	A549, Mcf7	NA	ANNOTATED, CDS, coding, INTERNAL, OVCODE, OVEXON	NM_033141	MAP3K9	Salzman2013
chr3_180651122_180653019_+	hsa_circ_0068129	1898	147	K562, H1hesc, Ag04450, Sknshra	NA	ANNOTATED, coding, INTERNAL, OVCODE, OVEXON, UTR5	NM_001013439	FXR1	Salzman2013
chr1_176050288_176085817_-	hsa_circ_0015365	35530	309	K562, H1hesc, Gm12878, Ag04450	NA	ANNOTATED, CDS, coding, INTERNAL, OVCODE, OVEXON	NM_022457	RFWD2	Salzman2013
chr21_37619815_37620866_+	hsa_circ_0001187	1052	301	cd_19, cd_34, neutr, Nhek, K562, Huvec, Hmec, Hepg2, Helas3, H1hesc, Gm12878, Bj, Ag04450, Sknshra	None	ANNOTATED, CDS, coding, INTERNAL	NM_005128	DOPEY2	Memczak2013, Salzman2013
chr1_51906019_51913807_-	hsa_circ_0006125	7789	479	Hs68_RNase, Hs68_control, K562, Helas3, Gm12878, Ag04450	None	ANNOTATED, CDS, coding, INTERNAL, OVCODE, OVEXON	NM_001981	EPS15	Jeck2013, Salzman2013
chr12_27867713_27890541_+	hsa_circ_0009017	22829	590	Hs68_RNase, Hs68_control, K562, Huvec, H1hesc, Ag04450	None	ANNOTATED, CDS, coding, INTERNAL, OVCODE, OVEXON	NM_021821	MRPS35	Jeck2013, Salzman2013
chr11_65271200_65272066_+	hsa_circ_0002082	867	867	Hs68_RNase, Hs68_control	None	ALT_ACCEPTOR, ALT_DONOR, INTERNAL, ncRNA, OVERLAPTX, OVEXON	NR_002819	MALAT1	Jeck2013
chr14_32902666_32903023_+	hsa_circ_0031587	358	358	Sknshra	NA	ANNOTATED, CDS, coding, INTERNAL, OVCODE, OVEXON, UTR5	NM_004274	AKAP6	Salzman2013
chr3_196626537_196630481_+	hsa_circ_0068673	3945	371	Sknshra	NA	ANNOTATED, CDS, coding, INTERNAL, OVCODE, OVEXON	NM_152699	SENP5	Salzman2013
chr17_19445706_19451446_+	hsa_circ_0042372	5741	320	Hepg2, Helas3, Sknshra	NA	ANNOTATED, CDS, coding, INTERNAL, OVCODE, OVEXON	NM_018242	SLC47A1	Salzman2013
chr14_31112522_31122794_+	hsa_circ_0031424	10273	332	K562, Helas3, Bj, Ag04450, A549	NA	ANNOTATED, CDS, coding, INTERNAL, OVCODE, OVEXON	NM_016106	SCFD1	Salzman2013
chrX_133607389_133627620_+	hsa_circ_0004549	20232	458	Hs68_RNase, Hs68_control	None	ANNOTATED, CDS, coding, INTERNAL, OVCODE, OVEXON	NM_000194	HPRT1	Jeck2013
chr20_47708583_47711500_+	hsa_circ_0008707	2918	461	Hs68_RNase, Hs68_control, K562, H1hesc, Gm12878, Sknshra	None	ANNOTATED, CDS, coding, INTERNAL, OVCODE, OVEXON	NM_001316	CSE1L	Jeck2013, Salzman2013
chrX_21869627_21871621_+	hsa_circ_0090049	1995	232	K562, Hepg2, Helas3, Bj, Ag04450, A549, Sknshra, Mcf7	NA	ANNOTATED, CDS, coding, INTERNAL, OVCODE, OVEXON	NM_015884	MBTPS2	Salzman2013
chr8_141874411_141900868_-	hsa_circ_0002483	26458	482	Hs68_RNase, Hs68_control, Nhek, K562, Huvec, Hepg2, Helas3, H1hesc, Bj, Ag04450, A549, Sknshra, Mcf7	None	ANNOTATED, CDS, coding, INTERNAL, OVCODE, OVEXON, UTR5	NM_001199649	PTK2	Jeck2013, Salzman2013
chr2_61721029_61724142_-	hsa_circ_0006493	3114	486	Hs68_RNase, Hs68_control, K562, Gm12878, Bj, A549	None	ANNOTATED, CDS, coding, INTERNAL, OVCODE, OVEXON	NM_003400	XPO1	Jeck2013, Salzman2013
chr1_179033062_179033631_+	hsa_circ_0008653	570	364	Hs68_RNase, Hs68_control	None	ANNOTATED, CDS, coding, INTERNAL, OVCODE, OVEXON	NM_014864	FAM20B	Jeck2013
chr2_236945205_236957925_+	hsa_circ_0058814	12721	469	H1hesc	NA	ANNOTATED, CDS, coding, INTERNAL, OVCODE, OVEXON	NM_001037131	AGAP1	Salzman2013
chr17_27975162_27977818_-	hsa_circ_0042799	2657	348	Huvec, Helas3, H1hesc, Gm12878, Ag04450, Sknshra	NA	ANNOTATED, CDS, coding, INTERNAL, OVCODE, OVERLAPTX, OVEXON	NM_033389	SSH2	Salzman2013
chrX_85233771_85282561_-	hsa_circ_0091203	48791	265	Helas3, H1hesc, Gm12878, Bj, Ag04450	NA	ANNOTATED, CDS, coding, INTERNAL, OVCODE, OVERLAPTX, OVEXON	NM_000390	CHM	Salzman2013
chr15_99250791_99251336_+	hsa_circ_0005035	546	546	Hs68_RNase, Hs68_control, Nhek, K562, Huvec, Hsmm, Hepg2, Helas3, H1hesc, Bj, Ag04450, A549, Sknshra, Mcf7	None	ANNOTATED, CDS, coding, INTERNAL, OVCODE, OVEXON	NM_000875	IGF1R	Jeck2013, Salzman2013
chr20_42242490_42252685_+	hsa_circ_0060443	10196	438	Helas3, Gm12878, Ag04450, A549	NA	ANNOTATED, CDS, coding, INTERNAL, OVCODE, OVEXON	NM_016004	IFT52	Salzman2013
chr4_78678016_78697546_-	hsa_circ_0070085	19531	485	K562, Bj	NA	ANNOTATED, CDS, coding, INTERNAL, OVCODE, OVERLAPTX, OVEXON	NM_144571	CNOT6L	Salzman2013
chr1_167734820_167742605_+	hsa_circ_0015107	7786	514	K562, H1hesc, Gm12878, Sknshra	NA	ANNOTATED, CDS, coding, INTERNAL, OVCODE, OVEXON	NM_003953	MPZL1	Salzman2013
chr16_31733947_31734674_+	hsa_circ_0007059	728	223	Hs68_RNase, Hs68_control, Huvec	None	ANNOTATED, CDS, coding, INTERNAL, OVCODE, OVEXON	NM_001130913	ZNF720	Jeck2013, Salzman2013
chr17_64683229_64685165_+	hsa_circ_0004576	1937	389	Hs68_RNase, Hs68_control, K562, Sknshra	None	ANNOTATED, CDS, coding, INTERNAL, OVCODE, OVEXON	NM_002737	PRKCA	Jeck2013, Salzman2013
chr14_97299804_97327072_+	hsa_circ_0000566	27269	1073	HEK293, cd_19, cd_34, neutr	None	ANNOTATED, CDS, coding, INTERNAL, UTR5	NM_003384	VRK1	Memczak2013
chr14_93730131_93730339_-	hsa_circ_0005682	209	209	Hs68_RNase, Hs68_control, Nhek, K562	None	ANNOTATED, CDS, coding, INTERNAL, OVCODE, OVEXON	NM_001002860	BTBD7	Jeck2013, Salzman2013
chr11_120916383_120918376_+	hsa_circ_0024656	1994	290	H1hesc, Ag04450, Sknshra	NA	ANNOTATED, CDS, coding, INTERNAL, OVCODE, OVEXON, UTR5	NM_152715	TBCEL	Salzman2013
chr10_106019334_106022835_+	hsa_circ_0009067	3502	322	Hs68_RNase, Hs68_control	None	ANNOTATED, CDS, coding, INTERNAL, OVCODE, OVEXON	NM_001191003	GSTO1	Jeck2013
chr14_103336522_103342862_+	hsa_circ_0004166	6341	587	Hs68_RNase, Hs68_control, K562, Huvec, Helas3, Gm12878	None	ANNOTATED, CDS, coding, INTERNAL, OVCODE, OVEXON, UTR5	NM_145725	TRAF3	Jeck2013, Salzman2013
chr6_24416625_24418806_+	hsa_circ_0075835	2182	388	K562, A549	NA	ANNOTATED, CDS, coding, INTERNAL, OVCODE, OVEXON	NM_020662	MRS2	Salzman2013
chr1_220386229_220387321_-	hsa_circ_0002924	1093	206	Hs68_RNase, Hs68_control, Nhek, K562, H1hesc	None	ANNOTATED, CDS, coding, INTERNAL, OVCODE, OVEXON	NM_012414	RAB3GAP2	Jeck2013, Salzman2013
chr15_75215989_75219228_-	hsa_circ_0007840	3240	245	Hs68_RNase, Hs68_control	None	ANNOTATED, CDS, coding, INTERNAL, OVCODE, OVEXON, UTR3	NM_004255	COX5A	Jeck2013
chr6_89600214_89650899_-	hsa_circ_0003393	50686	832	Hs68_RNase, Hs68_control, K562, Hepg2, H1hesc, Gm12878, Bj, Ag04450, A549, Sknshra	None	ANNOTATED, CDS, coding, INTERNAL, OVCODE, OVEXON	NM_003800	RNGTT	Jeck2013, Salzman2013
chr5_142416761_142437312_+	hsa_circ_0074368	20552	394	Helas3, H1hesc, Bj, A549, Sknshra	NA	ANNOTATED, CDS, coding, INTERNAL, OVCODE, OVEXON	NM_015071	ARHGAP26	Salzman2013
chr17_26685939_26687594_+	hsa_circ_0042536	1656	207	Helas3	NA	ANNOTATED, CDS, coding, INTERNAL, OVCODE, OVEXON	NM_152464	TMEM199	Salzman2013
chr17_3988964_3989949_-	hsa_circ_0006631	986	304	Hs68_RNase, Hs68_control, K562, Hepg2, Helas3, Ag04450, A549, Sknshra	None	ANNOTATED, CDS, coding, INTERNAL, OVCODE, OVEXON	NM_015113	ZZEF1	Jeck2013, Salzman2013
chr6_99887645_99913012_-	hsa_circ_0077425	25368	1053	K562, Helas3, H1hesc, Gm12878, Ag04450, A549, Nhek	NA	ANNOTATED, CDS, coding, INTERNAL, OVCODE, OVERLAPTX, OVEXON	NM_001080481	USP45	Salzman2013
chr4_36212012_36216102_-	hsa_circ_0069396	4091	582	Hepg2, Gm12878	NA	ANNOTATED, CDS, coding, INTERNAL, OVCODE, OVEXON	NM_015230	ARAP2	Salzman2013
chr17_80851423_80861354_+	hsa_circ_0046555	9932	241	Nhek, K562, Hsmm, Hepg2, Helas3, Gm12878, Bj, Sknshra	NA	ANNOTATED, CDS, coding, INTERNAL, OVCODE, OVEXON	NM_005993	TBCD	Salzman2013
chr17_57842332_57851246_+	hsa_circ_0004027	8915	300	Hs68_RNase, Hs68_control, K562, Huvec, Hepg2, Helas3, Gm12878, Bj, Ag04450, A549, Sknshra	None	ANNOTATED, CDS, coding, INTERNAL, OVCODE, OVEXON	NM_030938	VMP1	Jeck2013, Salzman2013
chr10_17645559_17646046_-	hsa_circ_0006751	488	226	Hs68_RNase, Hs68_control	None	ANNOTATED, CDS, coding, INTERNAL, OVCODE, OVEXON	NM_014241	PTPLA	Jeck2013
chr16_68893787_68896964_+	hsa_circ_0003220	3178	758	Hs68_RNase, Hs68_control, Nhek, K562, Huvec, H1hesc, Gm12878, Bj, Ag04450, A549, Nhlf, Sknshra, Mcf7	None	ANNOTATED, CDS, coding, INTERNAL, OVCODE, OVEXON	NM_024562	TMCO7	Jeck2013, Salzman2013
chr9_80409379_80537261_-	hsa_circ_0087265	127883	599	K562, Gm12878, A549	NA	ANNOTATED, CDS, coding, INTERNAL, OVCODE, OVERLAPTX, OVEXON	NM_002072	GNAQ	Salzman2013
chr12_57891940_57892406_+	hsa_circ_0027261	467	321	Nhek, K562, Huvec, Hmec, Hepg2, Helas3, H1hesc, Gm12878, Bj, Ag04450, A549, Sknshra	NA	ANNOTATED, CDS, coding, INTERNAL, OVCODE, OVEXON	NM_004990	MARS	Salzman2013
chr11_118656761_118657227_-	hsa_circ_0004293	467	467	Hs68_RNase, Hs68_control, K562, H1hesc, Gm12878, Bj, Ag04450, Sknshra	None	ANNOTATED, CDS, coding, INTERNAL, OVCODE, OVEXON, UTR5	NM_004397	DDX6	Jeck2013, Salzman2013
chr17_57274905_57275150_+	hsa_circ_0044833	246	157	Nhek, K562, Hepg2, Gm12878, Ag04450, Sknshra	NA	ANNOTATED, CDS, coding, INTERNAL, OVCODE, OVEXON	NM_018304	PRR11	Salzman2013
chr3_32745360_32750312_+	hsa_circ_0064690	4953	408	K562, Gm12878	NA	ANNOTATED, CDS, coding, INTERNAL, OVCODE, OVEXON	NM_015442	CNOT10	Salzman2013
chr2_44729828_44732869_+	hsa_circ_0000996	3042	3042	cd_19, cd_34	DNA	ALT_ACCEPTOR, ALT_DONOR, coding, INTERNAL, intronic	NM_024766	CAMKMT	Memczak2013
chr3_122156017_122160963_-	hsa_circ_0066986	4947	205	Nhek, K562, Helas3, Gm12878, Ag04450, A549	NA	ANNOTATED, INTERNAL, ncRNA, OVCODE, OVEXON	NR_026698	KPNA1	Salzman2013
chr10_70733301_70741337_+	hsa_circ_0005421	8037	534	Hs68_RNase, Hs68_control, K562, H1hesc, A549	None	ANNOTATED, CDS, coding, INTERNAL, OVCODE, OVEXON	NM_004728	DDX21	Jeck2013, Salzman2013
chr4_106640217_106650656_+	hsa_circ_0004231	10440	814	Hs68_RNase, Hs68_control, K562, Hepg2, H1hesc, A549, Sknshra	None	ANNOTATED, CDS, coding, INTERNAL, OVCODE, OVEXON	NM_024751	GSTCD	Jeck2013, Salzman2013
chr16_11114050_11154879_+	hsa_circ_0000672	40830	813	cd_19, Hs68_RNase, Hs68_control, Nhek, K562, Huvec, Hsmm, Hepg2, Helas3, H1hesc, Gm12878, Bj, Ag04450, A549, Sknshra, Mcf7	None	ANNOTATED, CDS, coding, INTERNAL, OVCODE, OVEXON	NM_015226	CLEC16A	Jeck2013, Memczak2013, Salzman2013
chr4_48552609_48553595_-	hsa_circ_0069681	987	198	K562	NA	ANNOTATED, CDS, coding, INTERNAL, OVCODE, OVEXON	NM_015030	FRYL	Salzman2013
chr11_9450087_9452550_+	hsa_circ_0007056	2464	546	Hs68_RNase, Hs68_control	None	ANNOTATED, CDS, coding, INTERNAL, OVCODE, OVEXON	NM_006391	IPO7	Jeck2013
chr9_88571275_88577095_+	hsa_circ_0004267	5821	392	Hs68_RNase, Hs68_control, K562, Hepg2, Gm12878, Ag04450	None	ANNOTATED, CDS, coding, INTERNAL, OVCODE, OVEXON	NM_024635	NAA35	Jeck2013, Salzman2013
chr1_100459093_100464971_+	hsa_circ_0013298	5879	360	K562, Ag04450	NA	ANNOTATED, CDS, coding, INTERNAL, OVCODE, OVEXON, UTR5	NM_012243	SLC35A3	Salzman2013
chr1_214625148_214638300_-	hsa_circ_0007015	13153	498	Hs68_RNase, Hs68_control, Nhek, Gm12878	None	ANNOTATED, CDS, coding, INTERNAL, OVCODE, OVEXON, UTR5	NM_005401	PTPN14	Jeck2013, Salzman2013
chr19_5039847_5082515_+	hsa_circ_0048691	42669	777	K562, Hepg2, Gm12878	NA	ANNOTATED, CDS, coding, INTERNAL, OVCODE, OVERLAPTX, OVEXON	NM_015015	KDM4B	Salzman2013
chr3_12343020_12353952_+	hsa_circ_0007278	10933	10933	Hs68_RNase, Hs68_control	None	ALT_ACCEPTOR, coding, INTERNAL, intronic, OVEXON, UTR5	NM_138711	PPARG	Jeck2013
chr16_28163980_28167848_-	hsa_circ_0007807	3869	581	Hs68_RNase, Hs68_control, Nhek, K562, Hepg2, Helas3, H1hesc, Bj, Ag04450, Sknshra, Mcf7	None	ANNOTATED, CDS, coding, INTERNAL, OVCODE, OVEXON	NM_015171	XPO6	Jeck2013, Salzman2013
chr11_118625414_118627996_-	hsa_circ_0024490	2583	466	K562	NA	ANNOTATED, CDS, coding, INTERNAL, OVCODE, OVEXON, UTR3	NM_004397	DDX6	Salzman2013
chr2_172305191_172333460_+	hsa_circ_0057051	28270	861	K562, Gm12878, Bj, Sknshra	NA	ANNOTATED, CDS, coding, INTERNAL, OVCODE, OVEXON	NM_025000	DCAF17	Salzman2013
chr6_57072426_57075243_-	hsa_circ_0008325	2818	306	Hs68_RNase, Hs68_control, Bj	None	ANNOTATED, CDS, coding, INTERNAL, OVCODE, OVEXON, UTR5	NM_016277	RAB23	Jeck2013, Salzman2013
chr15_101149912_101152632_+	hsa_circ_0007550	2721	384	Hs68_RNase, Hs68_control, Nhek, K562, Helas3, Gm12878, Ag04450	None	ANNOTATED, CDS, coding, INTERNAL, OVCODE, OVEXON, UTR5	NM_198243	ASB7	Jeck2013, Salzman2013
chr20_62407031_62407315_-	hsa_circ_0061178	285	285	H1hesc	NA	ANNOTATED, CDS, coding, INTERNAL, OVCODE, OVEXON	NM_025224	ZBTB46	Salzman2013
chr13_76134889_76169126_+	hsa_circ_0003455	34238	496	Hs68_RNase, Hs68_control	None	ANNOTATED, CDS, coding, INTERNAL, OVCODE, OVEXON	NM_006002	UCHL3	Jeck2013
chr11_20424465_20448411_+	hsa_circ_0021502	23947	288	K562, A549	NA	ANNOTATED, CDS, coding, INTERNAL, OVCODE, OVEXON	NM_005788	PRMT3	Salzman2013
chr9_19423860_19424839_+	hsa_circ_0086482	980	257	K562, Helas3, H1hesc, Gm12878, Bj, Ag04450, Sknshra	NA	ANNOTATED, CDS, coding, INTERNAL, OVCODE, OVEXON	NM_001010887	ACER2	Salzman2013
chr10_69797850_69826974_-	hsa_circ_0006263	29125	22891	Hs68_RNase, Hs68_control	None	ALT_ACCEPTOR, CDS, coding, INTERNAL, intronic, OVCODE, OVEXON	NM_022079	HERC4	Jeck2013
chr5_65307877_65310553_+	hsa_circ_0001494	2677	226	HEK293, cd_19, K562, Gm12878, Ag04450, Nhek	None	ANNOTATED, CDS, coding, INTERNAL	NM_001253697	ERBB2IP	Memczak2013, Salzman2013
chr11_755879_760253_+	hsa_circ_0003307	4375	364	Hs68_RNase, Hs68_control, K562, Hepg2, H1hesc, Bj, Ag04450, A549, Sknshra	None	ANNOTATED, CDS, coding, INTERNAL, OVCODE, OVEXON	NM_006755	TALDO1	Jeck2013, Salzman2013
chr2_61505300_61508377_-	hsa_circ_0007493	3078	435	Hs68_RNase, Hs68_control, Nhek, K562, Gm12878, Bj, Ag04450	None	ANNOTATED, CDS, coding, INTERNAL, OVCODE, OVEXON	NM_014709	USP34	Jeck2013, Salzman2013
chr15_86207794_86213061_+	hsa_circ_0036649	5268	302	Hepg2, Helas3, H1hesc, Gm12878, Bj, Ag04450, A549	NA	ANNOTATED, CDS, coding, INTERNAL, OVCODE, OVERLAPTX, OVEXON	NM_006738	AKAP13	Salzman2013
chr18_19112434_19112621_-	hsa_circ_0047071	188	188	K562, Gm12878, Ag04450	NA	ANNOTATED, CDS, coding, INTERNAL, OVCODE, OVEXON	NM_052911	ESCO1	Salzman2013
chr2_240111529_240274613_-	hsa_circ_0058911	163085	558	H1hesc, Gm12878	NA	ANNOTATED, CDS, coding, INTERNAL, OVCODE, OVERLAPTX, OVEXON, UTR5	NM_006037	HDAC4	Salzman2013
chr9_132265602_132265951_+	hsa_circ_0089041	350	350	Hepg2, Helas3, Bj, Ag04450, A549, Sknshra, Mcf7	SINE	ANNOTATED, INTERNAL, ncRNA, OVERLAPTX, OVEXON	TCONS_l2_00029080	TCONS_l2_00029080	Salzman2013
chr10_5751493_5756170_+	hsa_circ_0003755	4678	4678	Hs68_RNase, Hs68_control	None	ALT_ACCEPTOR, ALT_DONOR, coding, INTERNAL, intronic, OVEXON, UTR5	NM_017782	FAM208B	Jeck2013
chr7_104678573_104681470_+	hsa_circ_0007395	2898	259	Hs68_RNase, Hs68_control, Nhek, K562, Hepg2, Helas3, H1hesc, Gm12878, Bj, Ag04450, A549, Sknshra, Mcf7	None	ANNOTATED, CDS, coding, INTERNAL, OVCODE, OVEXON, UTR5	NM_182931	MLL5	Jeck2013, Salzman2013
chr3_124996570_124998091_-	hsa_circ_0006095	1522	208	Hs68_RNase, Hs68_control, K562, Hepg2, Helas3, H1hesc, Gm12878, Bj, Ag04450, A549, Sknshra	None	ANNOTATED, CDS, coding, INTERNAL, OVCODE, OVEXON	NM_021964	ZNF148	Jeck2013, Salzman2013
chr4_146435590_146436165_+	hsa_circ_0007970	576	576	Hs68_RNase, Hs68_control, Huvec, H1hesc	None	ANNOTATED, CDS, coding, INTERNAL, OVCODE, OVEXON, UTR5	NM_005900	SMAD1	Jeck2013, Salzman2013
chr1_92786156_92811471_+	hsa_circ_0013153	25316	1200	K562, Mcf7	NA	ANNOTATED, CDS, coding, INTERNAL, OVCODE, OVEXON	NM_024813	RPAP2	Salzman2013
chr17_80521230_80529746_+	hsa_circ_0000817	8517	490	HEK293, cd_34, Hs68_RNase, Hs68_control, Nhek, K562, Hepg2, Helas3, H1hesc, Gm12878, Bj, Ag04450, A549, Sknshra, Mcf7	None	ANNOTATED, CDS, coding, INTERNAL, OVCODE, OVEXON	NM_004514	FOXK2	Jeck2013, Memczak2013, Salzman2013
chr9_128061169_128061385_+	hsa_circ_0088568	217	217	K562, Gm12878, A549	NA	ANNOTATED, CDS, coding, INTERNAL, OVCODE, OVEXON, UTR5	NM_015635	GAPVD1	Salzman2013
chr1_151611364_151611595_+	hsa_circ_0000130	232	232	HEK293, cd_19, Hs68_RNase, Hs68_control, Nhek, K562, Helas3, H1hesc, Gm12878, Bj, Ag04450, A549, Sknshra	None	ANNOTATED, CDS, coding, INTERNAL, OVCODE, OVEXON	NM_030918	SNX27	Jeck2013, Memczak2013, Salzman2013
chr11_119144578_119145663_+	hsa_circ_0000362	1086	279	cd_34, Hs68_RNase, Hs68_control, K562, Hsmm, Hepg2, Helas3, H1hesc, Gm12878, Bj, Ag04450, Nhek, Mcf7	None	ANNOTATED, CDS, coding, INTERNAL, OVCODE, OVEXON	NM_005188	CBL	Jeck2013, Memczak2013, Salzman2013
chr12_57463017_57466695_-	hsa_circ_0000411	3679	418	neutr, Hs68_RNase, Hs68_control, K562, Hepg2, Helas3, Gm12878, Bj, A549	None	ANNOTATED, CDS, coding, INTERNAL, OVCODE, OVEXON	NM_001130963	TMEM194A	Jeck2013, Memczak2013, Salzman2013
chr14_55168780_55169298_+	hsa_circ_0004846	519	519	Hs68_RNase, Hs68_control, Nhek, K562, Huvec, Hepg2, Helas3, H1hesc, Bj, Ag04450, A549	None	ANNOTATED, CDS, coding, INTERNAL, OVCODE, OVEXON	NM_015589	SAMD4A	Jeck2013, Salzman2013
chr10_76910272_76910864_+	hsa_circ_0006148	593	593	Hs68_RNase, Hs68_control, Nhek, Hepg2, Gm12878, Bj, Ag04450, Sknshra	None	ANNOTATED, CDS, coding, INTERNAL, OVCODE, OVEXON, UTR5	NM_144660	SAMD8	Jeck2013, Salzman2013
chr19_52785364_52786666_+	hsa_circ_0052095	1303	256	Nhek, K562, Hepg2, H1hesc, Gm12878, Bj, Ag04450, A549, Sknshra	NA	ANNOTATED, CDS, coding, INTERNAL, OVCODE, OVEXON	NM_001010851	ZNF766	Salzman2013
chr15_51250689_51260574_+	hsa_circ_0004633	9886	418	Hs68_RNase, Hs68_control	None	ANNOTATED, CDS, coding, INTERNAL, OVCODE, OVEXON	NM_001252127	AP4E1	Jeck2013
chr1_231672959_231678357_+	hsa_circ_0004834	5399	246	Hs68_RNase, Hs68_control, Nhek, K562, Gm12878, Bj, Ag04450, Sknshra	None	ANNOTATED, INTERNAL, ncRNA, OVCODE, OVEXON	NR_028393	TSNAX-DISC1	Jeck2013, Salzman2013
chr16_87782279_87795646_-	hsa_circ_0000724	13368	407	cd_19, Hs68_RNase, Hs68_control, Nhek, K562, Huvec, Hepg2, Helas3, H1hesc, Gm12878, Bj, Ag04450, A549, Sknshra, Mcf7	None	ANNOTATED, CDS, coding, INTERNAL, OVCODE, OVEXON	NM_017566	KLHDC4	Jeck2013, Memczak2013, Salzman2013
chr2_32396356_32409407_+	hsa_circ_0053423	13052	401	Nhek, K562, Sknshra	NA	ANNOTATED, CDS, coding, INTERNAL, OVCODE, OVEXON	NM_001193513	SLC30A6	Salzman2013
chr1_12638746_12640694_-	hsa_circ_0010024	1949	503	K562, Hepg2, Helas3, H1hesc, Gm12878, Bj, Ag04450, Sknshra	NA	ANNOTATED, CDS, coding, INTERNAL, OVCODE, OVERLAPTX, OVEXON	NM_004753	DHRS3	Salzman2013
chr2_61710092_61717911_-	hsa_circ_0002607	7820	925	Hs68_RNase, Hs68_control, Nhek, K562, Huvec, Hepg2, Helas3, H1hesc, Gm12878, Bj, Ag04450, Sknshra	None	ANNOTATED, CDS, coding, INTERNAL, OVCODE, OVEXON	NM_003400	XPO1	Jeck2013, Salzman2013
chr5_179665332_179668155_-	hsa_circ_0075341	2824	261	K562, H1hesc, Gm12878, Ag04450	NA	ANNOTATED, CDS, coding, INTERNAL, OVCODE, OVEXON	NM_139069	MAPK9	Salzman2013
chr1_93301747_93303190_+	hsa_circ_0003069	1444	381	Hs68_RNase, Hs68_control, K562, Helas3, Ag04450, Sknshra	None	ANNOTATED, CDS, coding, INTERNAL, OVCODE, OVERLAPTX, OVEXON	NM_000969	RPL5	Jeck2013, Salzman2013
chr7_128220053_128232071_+	hsa_circ_0007005	12019	264	Hs68_RNase, Hs68_control	None	ANNOTATED, INTERNAL, ncRNA, OVEXON	TCONS_l2_00026200	TCONS_l2_00026200	Jeck2013
chr9_96259753_96261168_+	hsa_circ_0087546	1416	226	K562, Sknshra, Mcf7	NA	ANNOTATED, CDS, coding, INTERNAL, OVCODE, OVEXON	NM_014612	FAM120A	Salzman2013
chr6_13639795_13644961_-	hsa_circ_0001578	5167	598	neutr, Hs68_RNase, Hs68_control, K562, Huvec, Hsmm, Hepg2, Helas3, H1hesc, Gm12878, Bj, Ag04450, A549, Nhek, Sknshra	None	ANNOTATED, CDS, coding, INTERNAL, OVCODE, OVEXON	NM_005493	RANBP9	Jeck2013, Memczak2013, Salzman2013
chr3_11399892_11468400_+	hsa_circ_0008210	68509	795	Hs68_RNase, Hs68_control, Nhek, K562, Hsmm, Hepg2, Helas3, H1hesc, Gm12878, Bj, Ag04450, A549, Nhlf, Sknshra, Mcf7	None	ANNOTATED, CDS, coding, INTERNAL, OVCODE, OVEXON	NM_006395	ATG7	Jeck2013, Salzman2013
chr3_195415404_195416309_+	hsa_circ_0008267	906	906	Hs68_RNase, Hs68_control	None	ALT_DONOR, downstream_end, ncRNA, OVEXON	NR_003265	SDHAP2	Jeck2013
chr6_106696025_106740981_-	hsa_circ_0006490	44957	337	Hs68_RNase, Hs68_control, Huvec, A549	None	ANNOTATED, CDS, coding, INTERNAL, OVCODE, OVEXON	NM_004849	ATG5	Jeck2013, Salzman2013
chr10_70246901_70266475_-	hsa_circ_0007778	19575	619	Hs68_RNase, Hs68_control, Nhek, K562, Hepg2, H1hesc, Gm12878, Bj, Ag04450, Sknshra, Mcf7	None	ANNOTATED, CDS, coding, INTERNAL, OVCODE, OVEXON	NM_152707	SLC25A16	Jeck2013, Salzman2013
chr5_179249958_179252226_+	hsa_circ_0075318	2269	549	Hepg2, Ag04450, A549	NA	ANNOTATED, CDS, coding, INTERNAL, OVCODE, OVEXON, UTR5	NM_001142298	SQSTM1	Salzman2013
chrX_47102795_47104881_+	hsa_circ_0090434	2087	687	Gm12878, Sknshra	NA	ANNOTATED, CDS, coding, INTERNAL, OVCODE, OVEXON	NM_004651	USP11	Salzman2013
chr2_122363277_122363756_-	hsa_circ_0007052	480	480	Hs68_RNase, Hs68_control, Nhek, K562, Hepg2, Helas3, H1hesc, Gm12878, Bj, Ag04450, A549	None	ANNOTATED, CDS, coding, INTERNAL, OVCODE, OVEXON, UTR5	NM_015282	CLASP1	Jeck2013, Salzman2013
chr11_3723693_3724122_-	hsa_circ_0007605	430	430	Hs68_RNase, Hs68_control, K562	None	ANNOTATED, CDS, coding, INTERNAL, OVCODE, OVEXON	NM_016320	NUP98	Jeck2013, Salzman2013
chr1_52289336_52299842_-	hsa_circ_0007430	10507	447	Hs68_RNase, Hs68_control, K562, H1hesc	None	ANNOTATED, CDS, coding, INTERNAL, OVCODE, OVEXON	NM_002525	NRD1	Jeck2013, Salzman2013
chr14_89192885_89221015_-	hsa_circ_0032877	28131	990	Helas3, Gm12878, Ag04450, Nhlf, Sknshra, Mcf7	NA	ANNOTATED, CDS, coding, INTERNAL, OVCODE, OVERLAPTX, OVEXON	NM_183387	EML5	Salzman2013
chr4_83795764_83803093_-	hsa_circ_0003716	7330	643	Hs68_RNase, Hs68_control	None	ANNOTATED, CDS, coding, INTERNAL, OVCODE, OVEXON, UTR5	NM_001077207	SEC31A	Jeck2013
chr10_93699709_93702325_+	hsa_circ_0019120	2617	262	K562, Gm12878	NA	ANNOTATED, CDS, coding, INTERNAL, OVCODE, OVEXON	NM_003972	BTAF1	Salzman2013
chr9_80409379_80430686_-	hsa_circ_0087264	21308	414	K562, Gm12878, Ag04450	NA	ANNOTATED, CDS, coding, INTERNAL, OVCODE, OVERLAPTX, OVEXON	NM_002072	GNAQ	Salzman2013
chr12_27867713_27877119_+	hsa_circ_0000384	9407	410	HEK293, cd_19, Hs68_RNase, Hs68_control, Nhek, K562, Huvec, H1hesc, Gm12878, Bj, Ag04450, A549, Sknshra, Mcf7	None	ANNOTATED, CDS, coding, INTERNAL, OVCODE, OVEXON	NM_001190864	MRPS35	Jeck2013, Memczak2013, Salzman2013
chr17_78237373_78247203_+	hsa_circ_0006761	9831	369	Hs68_RNase, Hs68_control, K562, Bj	None	ANNOTATED, CDS, coding, INTERNAL, OVCODE, OVEXON, UTR5	NM_020914	RNF213	Jeck2013, Salzman2013
chr2_15534351_15536599_-	hsa_circ_0052749	2249	186	K562, A549	NA	ANNOTATED, CDS, coding, INTERNAL, OVCODE, OVEXON	NM_015909	NBAS	Salzman2013
chr18_21644104_21649235_+	hsa_circ_0000839	5132	293	neutr, Hs68_RNase, Hs68_control, Nhek, Hepg2, Helas3, H1hesc, Gm12878, Bj, Ag04450, A549, Sknshra	None	ANNOTATED, CDS, coding, INTERNAL, OVCODE, OVEXON	NM_001135993	TTC39C	Jeck2013, Memczak2013, Salzman2013
chr2_70451686_70463307_-	hsa_circ_0006138	11622	448	Hs68_RNase, Hs68_control	None	ANNOTATED, CDS, coding, INTERNAL, OVCODE, OVEXON	NM_022173	TIA1	Jeck2013
chr19_34954931_34957919_+	hsa_circ_0006992	2989	243	Hs68_RNase, Hs68_control, K562, Hepg2, Helas3, H1hesc, Gm12878, Ag04450, A549, Nhek, Sknshra	None	ANNOTATED, CDS, coding, INTERNAL, OVCODE, OVEXON	NM_005499	UBA2	Jeck2013, Salzman2013
chr15_50757244_50763992_+	hsa_circ_0035216	6749	308	K562, Gm12878, Ag04450	NA	ANNOTATED, CDS, coding, INTERNAL, OVCODE, OVEXON	NM_001128611	USP8	Salzman2013
chr12_111855923_111856681_+	hsa_circ_0006741	759	759	Hs68_RNase, Hs68_control, K562, Helas3, Bj, Ag04450, A549, Sknshra	None	ANNOTATED, CDS, coding, INTERNAL, OVCODE, OVEXON, UTR5	NM_005475	SH2B3	Jeck2013, Salzman2013
chr13_77700453_77703365_-	hsa_circ_0000495	2913	2913	cd_19, Hs68_RNase, Hs68_control	None	ALT_ACCEPTOR, CDS, coding, INTERNAL, intronic, OVCODE, OVEXON	NM_015057	MYCBP2	Jeck2013, Memczak2013
chr8_144547887_144557755_-	hsa_circ_0008835	9869	592	Hs68_RNase, Hs68_control	None	ANNOTATED, CDS, coding, INTERNAL, OVCODE, OVEXON	NM_015117	ZC3H3	Jeck2013
chr3_47712148_47718272_-	hsa_circ_0001294	6125	328	HEK293, Hs68_RNase, Hs68_control, Nhek, K562, Hepg2, Helas3, H1hesc, Gm12878, Ag04450, Sknshra, Mcf7	None	ANNOTATED, CDS, coding, INTERNAL, OVCODE, OVEXON	NM_003074	SMARCC1	Jeck2013, Memczak2013, Salzman2013
chr15_76576098_76588078_-	hsa_circ_0002226	11981	694	Hs68_RNase, Hs68_control, Nhek, K562, Hepg2, Helas3, H1hesc, Gm12878, Bj, Ag04450, A549, Mcf7	None	ANNOTATED, CDS, coding, INTERNAL, OVCODE, OVEXON	NM_000126	ETFA	Jeck2013, Salzman2013
chr3_56694759_56707753_-	hsa_circ_0001315	12995	1037	cd_34, neutr, Hs68_RNase, Hs68_control, K562, H1hesc, Gm12878, Ag04450, A549	None	ANNOTATED, CDS, coding, INTERNAL, OVCODE, OVEXON	NM_001112736	FAM208A	Jeck2013, Memczak2013, Salzman2013
chr15_76866499_76958130_-	hsa_circ_0006068	91632	330	Hs68_RNase, Hs68_control	None	ANNOTATED, CDS, coding, INTERNAL, OVCODE, OVERLAPTX, OVEXON	NM_001145923	SCAPER	Jeck2013
chr8_103846417_103848618_-	hsa_circ_0085278	2202	292	K562, Huvec, Sknshra	NA	ANNOTATED, CDS, coding, INTERNAL, OVCODE, OVEXON	NM_015878	AZIN1	Salzman2013
chr8_100286426_100287482_+	hsa_circ_0004366	1057	309	Hs68_RNase, Hs68_control, K562, Huvec, Hepg2, Helas3, Gm12878, Bj, Ag04450, A549, Sknshra, Mcf7	None	ANNOTATED, CDS, coding, INTERNAL, OVCODE, OVEXON	NM_017890	VPS13B	Jeck2013, Salzman2013
chr16_3860604_3863122_-	hsa_circ_0003077	2519	2519	Hs68_RNase, Hs68_control	None	ALT_ACCEPTOR, CDS, coding, INTERNAL, intronic, OVCODE, OVEXON	NM_004380	CREBBP	Jeck2013
chr3_48820419_48845117_-	hsa_circ_0065505	24699	280	Ag04450	NA	ANNOTATED, CDS, coding, INTERNAL, OVCODE, OVEXON	NM_004157	PRKAR2A	Salzman2013
chr5_14741936_14751348_-	hsa_circ_0071973	9413	495	Hepg2, Helas3, Gm12878, A549, Sknshra	NA	ANNOTATED, CDS, coding, INTERNAL, OVCODE, OVEXON	NM_054027	ANKH	Salzman2013
chr9_115030329_115060196_-	hsa_circ_0003500	29868	402	Hs68_RNase, Hs68_control, K562, Huvec, Hepg2, Helas3, H1hesc, Gm12878, Bj, Ag04450, A549, Nhek, Sknshra, Mcf7	None	ANNOTATED, CDS, coding, INTERNAL, OVCODE, OVEXON	NM_001163790	PTBP3	Jeck2013, Salzman2013
chr15_101968097_101972305_-	hsa_circ_0037104	4209	421	K562, H1hesc, A549	NA	ANNOTATED, CDS, coding, INTERNAL, OVCODE, OVEXON	NM_002570	PCSK6	Salzman2013
chr8_90600120_90608741_-	hsa_circ_0002915	8622	254	Hs68_RNase, Hs68_control	LINE	ALT_DONOR, INTERNAL, ncRNA, OVEXON	TCONS_l2_00028290	TCONS_l2_00028290	Jeck2013
chr16_21326632_21328447_+	hsa_circ_0005287	1816	925	Hs68_RNase, Hs68_control	None	ALT_ACCEPTOR, ALT_DONOR, INTERNAL, intronic, ncRNA, OVEXON	NR_026675	CRYM-AS1	Jeck2013
chr3_47079156_47088111_-	hsa_circ_0005870	8956	387	Hs68_RNase, Hs68_control, Nhek, K562, Hepg2, Helas3, H1hesc, Gm12878, Bj, Ag04450, A549, Sknshra, Mcf7	None	ANNOTATED, CDS, coding, INTERNAL, OVCODE, OVEXON	NM_014159	SETD2	Jeck2013, Salzman2013
chr14_80944597_80997230_-	hsa_circ_0006261	52634	19630	Hs68_RNase, Hs68_control	None	ALT_DONOR, CDS, coding, downstream_end, OVCODE, OVEXON, UTR3	NM_152446	CEP128	Jeck2013
chr17_30320884_30321740_+	hsa_circ_0042986	857	302	Nhek, K562, Hepg2, Helas3, H1hesc, Gm12878, Bj, Ag04450, A549, Sknshra	NA	ANNOTATED, CDS, coding, INTERNAL, OVCODE, OVERLAPTX, OVEXON	NM_015355	SUZ12	Salzman2013
chr7_138951079_138957186_+	hsa_circ_0005594	6108	320	Hs68_RNase, Hs68_control, K562, Gm12878, Ag04450	None	ANNOTATED, CDS, coding, INTERNAL, OVCODE, OVEXON	NM_173569	UBN2	Jeck2013, Salzman2013
chr2_75745182_75749613_-	hsa_circ_0008440	4432	276	Hs68_RNase, Hs68_control, Nhek, Huvec, Hepg2, Helas3, Bj, Ag04450	None	ANNOTATED, CDS, coding, INTERNAL, OVCODE, OVEXON, UTR5	NM_001135032	FAM176A	Jeck2013, Salzman2013
chr18_19353585_19359646_+	hsa_circ_0008741	6062	377	Hs68_RNase, Hs68_control, K562, Hepg2, Helas3, H1hesc, Gm12878, Ag04450	None	ANNOTATED, CDS, coding, INTERNAL, OVCODE, OVEXON	NM_020774	MIB1	Jeck2013, Salzman2013
chr5_77452082_77461496_-	hsa_circ_0008938	9415	306	Hs68_RNase, Hs68_control	None	ANNOTATED, CDS, coding, INTERNAL, OVCODE, OVEXON	NM_003664	AP3B1	Jeck2013
chr7_117825701_117828459_+	hsa_circ_0001740	2759	176	cd_19	None	ALT_ACCEPTOR, CDS, coding, INTERNAL, intronic	NM_016200	NAA38	Memczak2013
chr7_74119496_74131270_+	hsa_circ_0006944	11775	294	Hs68_RNase, Hs68_control, Nhek, K562, H1hesc, Gm12878, Bj, Ag04450, A549, Sknshra, Mcf7	None	ANNOTATED, CDS, coding, INTERNAL, OVCODE, OVEXON	NM_032999	GTF2I	Jeck2013, Salzman2013
chr10_123718839_123721032_-	hsa_circ_0020256	2194	326	Nhek, K562, Gm12878	NA	ANNOTATED, CDS, coding, INTERNAL, OVCODE, OVEXON, UTR3	NM_017615	NSMCE4A	Salzman2013
chr7_30496337_30496658_-	hsa_circ_0079703	322	322	Ag04450	NA	ANNOTATED, CDS, coding, INTERNAL, OVCODE, OVEXON, UTR5	NM_006092	NOD1	Salzman2013
chr3_196831774_196846401_-	hsa_circ_0008500	14628	381	Hs68_RNase, Hs68_control, Nhek, K562, Huvec, Hepg2, Helas3, H1hesc, Gm12878, Bj, Ag04450, A549, Nhlf, Sknshra, Mcf7	None	ANNOTATED, CDS, coding, INTERNAL, OVCODE, OVEXON	NM_004087	DLG1	Jeck2013, Salzman2013
chr5_14290825_14316852_+	hsa_circ_0003989	26028	1191	Hs68_RNase, Hs68_control, Hepg2, Helas3	None	ANNOTATED, CDS, coding, INTERNAL, OVCODE, OVEXON	NM_007118	TRIO	Jeck2013, Salzman2013
chr4_79763539_79772210_+	hsa_circ_0070197	8672	480	K562	NA	ANNOTATED, CDS, coding, INTERNAL, OVCODE, OVEXON	NM_198892	BMP2K	Salzman2013
chr12_69109407_69119576_+	hsa_circ_0003599	10170	607	Hs68_RNase, Hs68_control, Ag04450	None	ANNOTATED, CDS, coding, INTERNAL, OVCODE, OVEXON	NM_020401	NUP107	Jeck2013, Salzman2013
chr14_56746394_56757174_+	hsa_circ_0000541	10781	489	cd_34	None	ANNOTATED, CDS, coding, INTERNAL	NM_021255	PELI2	Memczak2013
chr8_129021836_129022690_+	hsa_circ_0008849	855	855	Hs68_RNase, Hs68_control	None	ALT_ACCEPTOR, ALT_DONOR, INTERNAL, intronic, ncRNA	NR_003367	PVT1	Jeck2013
chr4_79747191_79754841_+	hsa_circ_0005031	7651	225	Hs68_RNase, Hs68_control, K562, H1hesc	None	ANNOTATED, CDS, coding, INTERNAL, OVCODE, OVEXON	NM_198892	BMP2K	Jeck2013, Salzman2013
chr9_20758089_20770237_+	hsa_circ_0005572	12149	514	Hs68_RNase, Hs68_control, Huvec, Hepg2, Gm12878	None	ANNOTATED, CDS, coding, INTERNAL, OVCODE, OVEXON	NM_017794	KIAA1797	Jeck2013, Salzman2013
chr14_35276657_35331528_-	hsa_circ_0031639	54872	613	K562, Hepg2, Ag04450	NA	ANNOTATED, CDS, coding, INTERNAL, OVCODE, OVEXON	NM_013448	BAZ1A	Salzman2013
chr7_50737419_50771605_-	hsa_circ_0080209	34187	453	Nhek, K562, Huvec, Hepg2, Helas3, H1hesc, Bj, Ag04450, A549, Sknshra	NA	ANNOTATED, CDS, coding, INTERNAL, OVCODE, OVEXON, UTR5	NM_001001555	GRB10	Salzman2013
chr12_122745808_122748746_-	hsa_circ_0029062	2939	381	Helas3, Gm12878, Bj, Ag04450	NA	ANNOTATED, CDS, coding, INTERNAL, OVCODE, OVEXON	NM_022916	VPS33A	Salzman2013
chr9_115024715_115060196_-	hsa_circ_0008192	35482	567	Hs68_RNase, Hs68_control, K562, Huvec, Hmec, Hepg2, Helas3, H1hesc, Gm12878, Bj, Ag04450, A549, Nhek, Nhlf, Sknshra, Mcf7	None	ANNOTATED, CDS, coding, INTERNAL, OVCODE, OVEXON	NM_001163790	PTBP3	Jeck2013, Salzman2013
chr1_151139410_151139890_+	hsa_circ_0000128	481	276	cd_19, neutr, Hs68_RNase, Hs68_control, Nhek, K562, Huvec, Hsmm, Hepg2, Helas3, H1hesc, Gm12878, Bj, Ag04450, A549, Sknshra, Mcf7	None	ANNOTATED, CDS, coding, INTERNAL, OVCODE, OVEXON	NM_001204848	TNFAIP8L2-SCNM1	Jeck2013, Memczak2013, Salzman2013
chr5_38991051_39021238_-	hsa_circ_0006308	30188	486	Hs68_RNase, Hs68_control, K562, H1hesc, Gm12878, Bj, Ag04450, A549, Nhek	None	ANNOTATED, CDS, coding, INTERNAL, OVCODE, OVEXON	NM_152756	RICTOR	Jeck2013, Salzman2013
chr12_123818600_123825635_-	hsa_circ_0029221	7036	359	K562, Helas3	NA	ANNOTATED, CDS, coding, INTERNAL, OVCODE, OVEXON	NM_001167856	SBNO1	Salzman2013
chr19_37697942_37698156_-	hsa_circ_0050777	215	215	Helas3, Bj, Ag04450, A549	NA	ANNOTATED, CDS, coding, INTERNAL, OVCODE, OVEXON, UTR5	NM_152279	ZNF585B	Salzman2013
chr2_242572332_242573494_-	hsa_circ_0007647	1163	1163	Hs68_RNase, Hs68_control	None	ANNOTATED, CDS, coding, INTERNAL, OVCODE, OVEXON	NM_015963	THAP4	Jeck2013
chr22_45970391_45972988_+	hsa_circ_0002878	2598	275	Hs68_RNase, Hs68_control	None	ANNOTATED, CDS, coding, INTERNAL, OVCODE, OVEXON	NM_006486	FBLN1	Jeck2013
chr9_36597219_36643080_+	hsa_circ_0007658	45862	516	Hs68_RNase, Hs68_control, Gm12878, A549	None	ANNOTATED, CDS, coding, INTERNAL, OVCODE, OVEXON	NM_014791	MELK	Jeck2013, Salzman2013
chr6_165862416_165863850_-	hsa_circ_0078638	1435	171	A549	NA	ANNOTATED, INTERNAL, ncRNA, OVCODE, OVERLAPTX, OVEXON	NR_045597	PDE10A	Salzman2013
chr10_35349802_35360267_-	hsa_circ_0000234	10466	339	HEK293, Hs68_RNase, Hs68_control, Nhek, A549, Sknshra	None	ANNOTATED, CDS, coding, INTERNAL, OVCODE, OVEXON	NM_001198778	CUL2	Jeck2013, Memczak2013, Salzman2013
chr3_128356642_128363826_-	hsa_circ_0067231	7185	372	Nhek, K562, Gm12878, Bj	NA	ANNOTATED, CDS, coding, INTERNAL, OVCODE, OVEXON	NM_002950	RPN1	Salzman2013
chr1_235643370_235658138_-	hsa_circ_0002343	14769	539	Hs68_RNase, Hs68_control, Nhek, K562, Hepg2, Helas3, H1hesc, Gm12878, Bj, Ag04450, A549, Sknshra	None	ANNOTATED, CDS, coding, INTERNAL, OVCODE, OVEXON	NM_152490	B3GALNT2	Jeck2013, Salzman2013
chr4_148867768_148944564_+	hsa_circ_0071121	76797	564	Hsmm, Sknshra	NA	ANNOTATED, CDS, coding, INTERNAL, OVCODE, OVEXON	NM_024605	ARHGAP10	Salzman2013
chr5_137342679_137347634_-	hsa_circ_0004894	4956	478	Hs68_RNase, Hs68_control	None	ANNOTATED, CDS, coding, INTERNAL, OVCODE, OVEXON	NM_016603	FAM13B	Jeck2013
chr7_65217151_65221561_+	hsa_circ_0005419	4411	2777	Hs68_RNase, Hs68_control	None	ALT_ACCEPTOR, INTERNAL, intronic, ncRNA, OVERLAPTX, OVEXON	NR_003110	CCT6P1	Jeck2013
chr22_38046159_38046732_+	hsa_circ_0063223	574	282	Nhek, Gm12878	NA	ANNOTATED, CDS, coding, INTERNAL, OVCODE, OVERLAPTX, OVEXON	NM_018957	SH3BP1	Salzman2013
chr20_34302107_34313077_-	hsa_circ_0004870	10971	680	Hs68_RNase, Hs68_control, Nhek, K562, Huvec, Helas3, H1hesc, Gm12878, Bj, Ag04450, A549, Sknshra	None	ANNOTATED, INTERNAL, ncRNA, OVCODE, OVEXON	NR_040722	RBM39	Jeck2013, Salzman2013
chr20_50290692_50307358_-	hsa_circ_0004770	16667	395	Hs68_RNase, Hs68_control	None	ANNOTATED, CDS, coding, INTERNAL, OVCODE, OVEXON	NM_006045	ATP9A	Jeck2013
chr6_21108632_21201505_+	hsa_circ_0075814	92874	312	Gm12878, A549	NA	ANNOTATED, CDS, coding, INTERNAL, OVCODE, OVERLAPTX, OVEXON	NM_017774	CDKAL1	Salzman2013
chr16_4516154_4519466_-	hsa_circ_0007788	3313	489	Hs68_RNase, Hs68_control, Nhek, K562, Huvec, Hmec, Hepg2, Helas3, H1hesc, Gm12878, Bj, Ag04450, A549, Sknshra, Mcf7	None	ANNOTATED, CDS, coding, INTERNAL, OVCODE, OVEXON	NM_020677	NMRAL1	Jeck2013, Salzman2013
chr1_40654727_40668286_+	hsa_circ_0006373	13560	573	Hs68_RNase, Hs68_control	None	ANNOTATED, CDS, coding, INTERNAL, OVCODE, OVEXON	NM_012421	RLF	Jeck2013
chr1_97235259_97250810_+	hsa_circ_0013252	15552	789	Nhek, H1hesc	NA	ANNOTATED, CDS, coding, INTERNAL, OVCODE, OVERLAPTX, OVEXON	NM_021190	PTBP2	Salzman2013
chr5_36953720_36962376_+	hsa_circ_0072161	8657	689	K562, Huvec, H1hesc, Gm12878, Bj, Ag04450, A549, Sknshra	NA	ANNOTATED, CDS, coding, INTERNAL, OVCODE, OVEXON, UTR5	NM_015384	NIPBL	Salzman2013
chr2_36623757_36669878_+	hsa_circ_0002346	46122	538	Hs68_RNase, Hs68_control, Nhek, Huvec, Hsmm, Hmec, Hepg2, Helas3, H1hesc, Gm12878, Bj, Ag04450, A549, Nhlf, Sknshra, Mcf7	None	ANNOTATED, CDS, coding, INTERNAL, OVCODE, OVEXON	NM_016441	CRIM1	Jeck2013, Salzman2013
chr6_89554076_89563483_-	hsa_circ_0077292	9408	373	H1hesc, A549	NA	ANNOTATED, CDS, coding, INTERNAL, OVCODE, OVERLAPTX, OVEXON	NM_003800	RNGTT	Salzman2013
chr6_166843941_166845978_-	hsa_circ_0078654	2038	249	Huvec, H1hesc, Gm12878, Bj, Ag04450, Nhek, Sknshra	NA	ANNOTATED, CDS, coding, INTERNAL, OVCODE, OVEXON	NM_021135	RPS6KA2	Salzman2013
chr15_67984817_67995746_+	hsa_circ_0036036	10930	197	K562, Hepg2, Helas3, Gm12878, A549, Sknshra	NA	ANNOTATED, CDS, coding, INTERNAL, OVCODE, OVERLAPTX, OVEXON	NM_145160	MAP2K5	Salzman2013
chrX_149895687_149901202_+	hsa_circ_0091685	5516	728	K562, Hepg2	NA	ANNOTATED, CDS, coding, INTERNAL, OVCODE, OVEXON	NM_003828	MTMR1	Salzman2013
chr6_7176888_7189555_+	hsa_circ_0001573	12668	709	neutr, Hs68_RNase, Hs68_control, K562, Huvec, Hsmm, Hepg2, Helas3, H1hesc, Gm12878, Bj, Ag04450, A549, Nhek, Nhlf, Sknshra, Mcf7	None	ANNOTATED, CDS, coding, INTERNAL, OVCODE, OVEXON, UTR5	NM_001168344	RREB1	Jeck2013, Memczak2013, Salzman2013
chr7_111926928_111936366_+	hsa_circ_0081984	9439	374	K562, A549	NA	ANNOTATED, CDS, coding, INTERNAL, OVCODE, OVEXON	NM_021994	ZNF277	Salzman2013
chr15_44134613_44136252_+	hsa_circ_0035042	1640	300	K562, Gm12878	NA	ANNOTATED, CDS, coding, INTERNAL, OVCODE, OVEXON	NM_024908	WDR76	Salzman2013
chr10_93220184_93221941_+	hsa_circ_0019101	1758	332	Hepg2, Helas3	NA	ANNOTATED, CDS, coding, INTERNAL, OVCODE, OVERLAPTX, OVEXON	NM_182765	HECTD2	Salzman2013
chr17_43197692_43198739_-	hsa_circ_0044158	1048	521	Nhek, Huvec, Hepg2, Helas3, Bj, Ag04450, A549	NA	ANNOTATED, CDS, coding, INTERNAL, OVCODE, OVEXON	NM_133373	PLCD3	Salzman2013
chr15_81199004_81201647_+	hsa_circ_0002970	2644	386	Hs68_RNase, Hs68_control, Hsmm, Hepg2, H1hesc, Bj, Ag04450, Nhlf	None	ANNOTATED, CDS, coding, INTERNAL, OVCODE, OVEXON	NM_018689	KIAA1199	Jeck2013, Salzman2013
chr15_50592986_50601995_-	hsa_circ_0003501	9010	733	Hs68_RNase, Hs68_control, Nhek, K562, Hepg2, Helas3, H1hesc, Gm12878, Bj, Ag04450, A549, Sknshra, Mcf7	None	ANNOTATED, CDS, coding, INTERNAL, OVCODE, OVEXON	NM_005254	GABPB1	Jeck2013, Salzman2013
chr12_22646157_22659753_-	hsa_circ_0025614	13597	224	K562, Huvec, H1hesc, Gm12878, A549	NA	ANNOTATED, CDS, coding, INTERNAL, OVCODE, OVEXON	NM_014802	KIAA0528	Salzman2013
chr3_169840379_169843795_-	hsa_circ_0007854	3417	3417	Hs68_RNase, Hs68_control	None	ALT_ACCEPTOR, CDS, coding, INTERNAL, intronic, OVCODE, OVEXON	NM_024947	PHC3	Jeck2013
chr15_75815462_75819602_-	hsa_circ_0005559	4141	359	Hs68_RNase, Hs68_control	None	ANNOTATED, CDS, coding, INTERNAL, OVCODE, OVEXON	NM_002833	PTPN9	Jeck2013
chr14_66096210_66136198_+	hsa_circ_0032248	39989	353	Gm12878	NA	ANNOTATED, CDS, coding, INTERNAL, OVCODE, OVERLAPTX, OVEXON	NM_178155	FUT8	Salzman2013
chr12_124130002_124137282_+	hsa_circ_0003725	7281	393	Hs68_RNase, Hs68_control, Nhek, K562, Bj, Ag04450, A549	LINE	ANNOTATED, CDS, coding, INTERNAL, OVCODE, OVEXON	NM_001516	GTF2H3	Jeck2013, Salzman2013
chr12_12397196_12397589_-	hsa_circ_0000378	394	394	HEK293, cd_19, Hs68_RNase, Hs68_control, Nhek, K562, Huvec, Bj, Ag04450	None	ANNOTATED, CDS, coding, INTERNAL, OVCODE, OVEXON	NM_002336	LRP6	Jeck2013, Memczak2013, Salzman2013
chr2_25458576_25459874_-	hsa_circ_0003235	1299	189	Hs68_RNase, Hs68_control	None	ANNOTATED, CDS, coding, INTERNAL, OVCODE, OVEXON	NM_175629	DNMT3A	Jeck2013
chr15_43313473_43317627_-	hsa_circ_0008984	4155	405	Hs68_RNase, Hs68_control, K562, H1hesc, Ag04450	None	ANNOTATED, CDS, coding, INTERNAL, OVCODE, OVEXON	NM_174916	UBR1	Jeck2013, Salzman2013
chr15_72208711_72231268_-	hsa_circ_0003454	22558	383	Hs68_RNase, Hs68_control, A549	None	ANNOTATED, CDS, coding, INTERNAL, OVCODE, OVEXON	NM_006901	MYO9A	Jeck2013, Salzman2013
chr1_94032836_94033408_-	hsa_circ_0006427	573	325	Hs68_RNase, Hs68_control, Nhek, K562, Huvec, Hepg2, H1hesc, Gm12878, Bj, Ag04450, A549	None	ANNOTATED, CDS, coding, INTERNAL, OVCODE, OVEXON	NM_003567	BCAR3	Jeck2013, Salzman2013
chr10_103699620_103717489_-	hsa_circ_0004117	17870	286	Hs68_RNase, Hs68_control	None	ANNOTATED, CDS, coding, INTERNAL, OVCODE, OVEXON	NM_024541	C10orf76	Jeck2013
chr20_17933231_17934761_-	hsa_circ_0006704	1531	246	Hs68_RNase, Hs68_control, Nhek, K562, Huvec, Hepg2, Helas3, H1hesc, Gm12878, Bj, Ag04450, A549, Sknshra, Mcf7	None	ANNOTATED, CDS, coding, INTERNAL, OVCODE, OVEXON	NM_152227	SNX5	Jeck2013, Salzman2013
chr7_141333701_141341708_+	hsa_circ_0082783	8008	387	K562	NA	ANNOTATED, CDS, coding, INTERNAL, OVCODE, OVEXON	NM_018238	AGK	Salzman2013
chr5_77711344_77717784_+	hsa_circ_0002186	6441	497	Hs68_RNase, Hs68_control, K562, Hepg2, Helas3, H1hesc, Gm12878, Bj, Ag04450, A549, Nhek, Sknshra, Mcf7	None	ANNOTATED, CDS, coding, INTERNAL, OVCODE, OVEXON	NM_004866	SCAMP1	Jeck2013, Salzman2013
chr7_128214774_128232071_+	hsa_circ_0006771	17298	284	Hs68_RNase, Hs68_control	None	ANNOTATED, INTERNAL, ncRNA, OVEXON	TCONS_l2_00026194	TCONS_l2_00026194	Jeck2013
chr2_32832522_32836649_+	hsa_circ_0008585	4128	324	Hs68_RNase, Hs68_control	None	ANNOTATED, CDS, coding, INTERNAL, OVCODE, OVEXON	NM_016252	BIRC6	Jeck2013
chr20_21195173_21213468_+	hsa_circ_0003194	18296	434	Hs68_RNase, Hs68_control, K562	None	ANNOTATED, CDS, coding, INTERNAL, OVCODE, OVEXON	NM_018474	PLK1S1	Jeck2013, Salzman2013
chr7_8257935_8275635_-	hsa_circ_0079422	17701	658	K562, Huvec, H1hesc, Sknshra	NA	ANNOTATED, CDS, coding, INTERNAL, OVCODE, OVERLAPTX, OVEXON, UTR5	NM_004968	ICA1	Salzman2013
chr10_15875629_15889942_-	hsa_circ_0006665	14314	636	Hs68_RNase, Hs68_control, K562, Huvec, Hepg2, H1hesc, Gm12878, Bj, Ag04450, A549, Sknshra, Mcf7	None	ANNOTATED, CDS, coding, INTERNAL, OVCODE, OVEXON	NM_024948	FAM188A	Jeck2013, Salzman2013
chr12_514677_527802_+	hsa_circ_0024951	13126	483	Huvec, Hepg2, H1hesc	NA	ANNOTATED, CDS, coding, INTERNAL, OVCODE, OVEXON, UTR5	NM_032358	CCDC77	Salzman2013
chr15_41001223_41021022_+	hsa_circ_0034616	19800	301	K562, Hepg2, Helas3, H1hesc, Gm12878, Ag04450	NA	ANNOTATED, CDS, coding, INTERNAL, OVCODE, OVEXON	NM_133487	RAD51	Salzman2013
chr8_25224386_25227157_+	hsa_circ_0006605	2772	401	Hs68_RNase, Hs68_control, Ag04450, A549	None	ANNOTATED, CDS, coding, INTERNAL, OVCODE, OVEXON	NM_024940	DOCK5	Jeck2013, Salzman2013
chr7_155556506_155559349_+	hsa_circ_0083110	2844	396	K562, Hepg2, Helas3, Bj, A549, Mcf7	NA	ANNOTATED, CDS, coding, INTERNAL, OVCODE, OVEXON	NM_053043	RBM33	Salzman2013
chr3_47476498_47484581_-	hsa_circ_0001292	8084	350	HEK293, cd_34, Hs68_RNase, Hs68_control, Nhek, K562, Hepg2, Helas3, H1hesc, Gm12878, Bj, Ag04450, Sknshra, Mcf7	None	ANNOTATED, CDS, coding, INTERNAL, OVCODE, OVEXON, UTR5	NM_012235	SCAP	Jeck2013, Memczak2013, Salzman2013
chr5_65307877_65324171_+	hsa_circ_0072725	16295	899	A549	NA	ANNOTATED, CDS, coding, INTERNAL, OVCODE, OVEXON	NM_001253699	ERBB2IP	Salzman2013
chr12_46622936_46648719_-	hsa_circ_0000397	25784	12144	HEK293, cd_19	LTR	ALT_ACCEPTOR, CDS, coding, INTERNAL, intronic, UTR5	NM_030674	SLC38A1	Memczak2013
chr5_137853250_137854556_-	hsa_circ_0074136	1307	316	K562, H1hesc, Gm12878, A549	NA	ANNOTATED, CDS, coding, INTERNAL, OVCODE, OVERLAPTX, OVEXON	NM_004730	ETF1	Salzman2013
chr1_44713611_44804994_-	hsa_circ_0012138	91384	720	Nhek, K562, Huvec, Hepg2, Helas3, H1hesc, Ag04450, Sknshra, Mcf7	NA	ANNOTATED, CDS, coding, INTERNAL, OVCODE, OVERLAPTX, OVEXON	NM_024066	ERI3	Salzman2013
chr19_46020921_46021352_+	hsa_circ_0000942	432	338	neutr, Nhek, K562, Hepg2, H1hesc, Gm12878, Bj, Mcf7	None	ANNOTATED, CDS, coding, INTERNAL	NM_003370	VASP	Memczak2013, Salzman2013
chr14_39562391_39565343_-	hsa_circ_0031731	2953	300	Gm12878	NA	ANNOTATED, CDS, coding, INTERNAL, OVCODE, OVEXON, UTR5	NM_006364	SEC23A	Salzman2013
chr1_151630711_151641111_+	hsa_circ_0002394	10401	606	Hs68_RNase, Hs68_control, Nhek, H1hesc, Gm12878, Ag04450, Sknshra	None	ANNOTATED, CDS, coding, INTERNAL, OVCODE, OVEXON	NM_030918	SNX27	Jeck2013, Salzman2013
chr14_61278705_61346553_+	hsa_circ_0008215	67849	389	Hs68_RNase, Hs68_control, Gm12878, Sknshra	None	ANNOTATED, CDS, coding, INTERNAL, OVCODE, OVEXON	NM_002431	MNAT1	Jeck2013, Salzman2013
chr15_22925777_22929895_+	hsa_circ_0034065	4119	575	Ag04450	NA	ANNOTATED, CDS, coding, INTERNAL, OVCODE, OVERLAPTX, OVEXON, UTR5	NM_014608	CYFIP1	Salzman2013
chr10_99196174_99197507_-	hsa_circ_0005887	1334	271	Hs68_RNase, Hs68_control	None	ALT_DONOR, CDS, coding, INTERNAL, OVCODE, OVEXON, UTR3	NM_016046	EXOSC1	Jeck2013
chr7_44465499_44467302_-	hsa_circ_0080035	1804	1804	K562, Helas3, Gm12878, Ag04450, A549, Sknshra, Mcf7	NA	ALT_DONOR, CDS, coding, INTERNAL, intronic, OVCODE, OVEXON	NM_015332	NUDCD3	Salzman2013
chr2_36668401_36669878_+	hsa_circ_0007386	1478	364	Hs68_RNase, Hs68_control, Nhek, K562, Huvec, Hsmm, Hmec, Hepg2, Helas3, H1hesc, Gm12878, Bj, Ag04450, A549, Nhlf, Sknshra, Mcf7	None	ANNOTATED, CDS, coding, INTERNAL, OVCODE, OVEXON	NM_016441	CRIM1	Jeck2013, Salzman2013
chr7_8043538_8099878_+	hsa_circ_0001678	56341	509	cd_19, Hs68_RNase, Hs68_control	None	ANNOTATED, CDS, coding, INTERNAL, OVCODE, OVEXON	NM_138426	GLCCI1	Jeck2013, Memczak2013
chr17_35578645_35583373_-	hsa_circ_0043244	4729	437	Nhek, K562, Hepg2, Helas3, Ag04450, A549	NA	ANNOTATED, CDS, coding, INTERNAL, OVCODE, OVEXON	NM_198839	ACACA	Salzman2013
chr18_77455225_77464917_+	hsa_circ_0006209	9693	458	Hs68_RNase, Hs68_control, K562, Huvec, Hepg2, Helas3, H1hesc, Gm12878, Sknshra, Mcf7	None	ANNOTATED, CDS, coding, INTERNAL, OVCODE, OVEXON	NM_004715	CTDP1	Jeck2013, Salzman2013
chr1_26772807_26774151_+	hsa_circ_0000034	1345	219	cd_34, neutr, Hs68_RNase, Hs68_control, Nhek, K562, Huvec, Hepg2, Helas3, H1hesc, Gm12878, Bj, Ag04450, A549, Sknshra	None	ANNOTATED, CDS, coding, INTERNAL, OVCODE, OVEXON	NM_205861	DHDDS	Jeck2013, Memczak2013, Salzman2013
chr4_184104556_184114861_+	hsa_circ_0003631	10306	10306	Hs68_RNase, Hs68_control	LINE	ALT_ACCEPTOR, CDS, coding, INTERNAL, intronic, OVCODE, OVEXON	NM_024949	WWC2	Jeck2013
chr2_32142995_32168452_-	hsa_circ_0053394	25458	376	Nhek, K562, Hepg2, Helas3, H1hesc, Gm12878, Bj, Ag04450, A549	NA	ANNOTATED, CDS, coding, INTERNAL, OVCODE, OVERLAPTX, OVEXON	NM_015955	MEMO1	Salzman2013
chr2_162036125_162061304_+	hsa_circ_0005227	25180	376	Hs68_RNase, Hs68_control, K562, Gm12878, Bj, Ag04450	None	ANNOTATED, CDS, coding, INTERNAL, OVCODE, OVEXON, UTR5	NM_004180	TANK	Jeck2013, Salzman2013
chr4_79158664_79176529_+	hsa_circ_0070098	17866	495	Hepg2, Helas3, H1hesc, Gm12878, Bj, Ag04450, Nhek, Sknshra	NA	ANNOTATED, CDS, coding, INTERNAL, OVCODE, OVEXON	NM_025074	FRAS1	Salzman2013
chr20_34243124_34246936_-	hsa_circ_0005587	3813	228	Hs68_RNase, Hs68_control, K562, Huvec, Hepg2, Helas3, H1hesc, Gm12878, Bj, Ag04450, A549, Nhlf, Sknshra, Mcf7	None	ALT_ACCEPTOR, INTERNAL, intronic, ncRNA, OVCODE, OVEXON	NR_037188	CPNE1	Jeck2013, Salzman2013
chr19_41088257_41089623_+	hsa_circ_0051106	1367	321	Gm12878, A549, Nhlf, Sknshra	NA	ANNOTATED, CDS, coding, INTERNAL, OVCODE, OVEXON	NM_138392	SHKBP1	Salzman2013
chr6_108243001_108250718_-	hsa_circ_0001635	7718	328	cd_19, neutr, Hs68_RNase, Hs68_control	None	ANNOTATED, CDS, coding, INTERNAL, OVCODE, OVEXON	NM_007214	SEC63	Jeck2013, Memczak2013
chr22_41277774_41278181_+	hsa_circ_0008360	408	408	Hs68_RNase, Hs68_control, Nhek, K562, H1hesc, Gm12878, Bj, Ag04450, A549, Mcf7	None	ANNOTATED, CDS, coding, INTERNAL, OVCODE, OVEXON	NM_022098	XPNPEP3	Jeck2013, Salzman2013
chr14_91409422_91467503_-	hsa_circ_0032940	58082	515	A549, Sknshra, Mcf7	NA	ANNOTATED, CDS, coding, INTERNAL, OVCODE, OVEXON	NM_004755	RPS6KA5	Salzman2013
chr5_43675613_43677908_+	hsa_circ_0003832	2296	242	Hs68_RNase, Hs68_control, K562, Huvec, Hepg2, Helas3, H1hesc, Gm12878, Bj, Ag04450, A549, Nhek, Sknshra	None	ANNOTATED, CDS, coding, INTERNAL, OVCODE, OVEXON	NM_012343	NNT	Jeck2013, Salzman2013
chr9_33036572_33037113_+	hsa_circ_0003762	542	217	Hs68_RNase, Hs68_control, K562, Helas3, H1hesc, Gm12878, A549	None	ANNOTATED, CDS, coding, INTERNAL, OVCODE, OVEXON	NM_001539	DNAJA1	Jeck2013, Salzman2013
chr4_85818064_85833472_-	hsa_circ_0009015	15409	15409	Hs68_RNase, Hs68_control	DNA	ALT_ACCEPTOR, coding, INTERNAL, intronic, OVEXON, UTR5	NM_014991	WDFY3	Jeck2013
chr14_53539315_53570574_-	hsa_circ_0031976	31260	686	K562, Mcf7	NA	ANNOTATED, CDS, coding, INTERNAL, OVCODE, OVERLAPTX, OVEXON	NM_001160147	DDHD1	Salzman2013
chr1_113196220_113202401_+	hsa_circ_0000109	6182	430	cd_19, Hs68_RNase, Hs68_control, Nhek, K562, Huvec, Hepg2, Helas3, H1hesc, Gm12878, Bj, Ag04450, A549, Sknshra, Mcf7	None	ANNOTATED, CDS, coding, INTERNAL, OVCODE, OVEXON	NM_006135	CAPZA1	Jeck2013, Memczak2013, Salzman2013
chr3_186504291_186505053_+	hsa_circ_0068462	763	282	Nhek, K562, Hepg2, Helas3, Gm12878, Ag04450, A549, Sknshra	NA	ANNOTATED, CDS, coding, INTERNAL, OVCODE, OVERLAPTX, OVEXON	NM_001967	EIF4A2	Salzman2013
chr14_91947920_91952074_-	hsa_circ_0003045	4155	717	Hs68_RNase, Hs68_control, Nhek, Huvec, Hsmm, Hepg2, Helas3, H1hesc, Gm12878, Bj, Ag04450, A549, Sknshra	None	ANNOTATED, CDS, coding, INTERNAL, OVCODE, OVEXON	NM_032560	SMEK1	Jeck2013, Salzman2013
chr12_89885713_89891119_-	hsa_circ_0027703	5407	352	Huvec, Gm12878, Bj	NA	ANNOTATED, CDS, coding, INTERNAL, OVCODE, OVEXON	NM_172240	POC1B	Salzman2013
chr2_71623271_71645769_+	hsa_circ_0055151	22499	922	Nhek, K562, Hepg2, Gm12878, Bj, Ag04450, A549, Sknshra	NA	ANNOTATED, CDS, coding, INTERNAL, OVCODE, OVEXON	NM_001252612	ZNF638	Salzman2013
chr15_22862935_22864369_+	hsa_circ_0004180	1435	372	Hs68_RNase, Hs68_control	None	ANNOTATED, CDS, coding, INTERNAL, OVCODE, OVEXON	NM_052903	TUBGCP5	Jeck2013
chr5_138160219_138163407_+	hsa_circ_0008196	3189	474	Hs68_RNase, Hs68_control, K562, Hepg2, Helas3, H1hesc, Ag04450, A549, Sknshra	None	ANNOTATED, CDS, coding, INTERNAL, OVCODE, OVEXON	NM_001903	CTNNA1	Jeck2013, Salzman2013
chr2_186946057_186951097_-	hsa_circ_0005843	5041	3304	Hs68_RNase, Hs68_control	None	ALT_ACCEPTOR, ncRNA, OVEXON, upstream_start	TCONS_l2_00015025	TCONS_l2_00015025	Jeck2013
chr5_52899282_52900725_+	hsa_circ_0005593	1444	1444	Hs68_RNase, Hs68_control	LINE	ALT_DONOR, CDS, coding, INTERNAL, intronic, OVCODE, OVEXON	NM_002495	NDUFS4	Jeck2013
chr7_100410369_100410830_-	hsa_circ_0001730	462	362	HEK293, cd_19, neutr, Hs68_RNase, Hs68_control, Nhek, K562, Huvec, Hsmm, Hmec, Hepg2, Helas3, H1hesc, Gm12878, Bj, Ag04450, A549, Nhlf, Sknshra, Mcf7	None	ANNOTATED, CDS, coding, INTERNAL, OVCODE, OVEXON	NM_004444	EPHB4	Jeck2013, Memczak2013, Salzman2013
chr15_85657104_85658718_+	hsa_circ_0003856	1615	214	Hs68_RNase, Hs68_control, K562, Hepg2, Helas3, H1hesc, Gm12878, Bj, Ag04450, A549, Sknshra, Mcf7	None	ANNOTATED, CDS, coding, INTERNAL, OVCODE, OVEXON	NM_002605	PDE8A	Jeck2013, Salzman2013
chr20_36694205_36694658_+	hsa_circ_0001155	454	454	cd_19	None	ALT_ACCEPTOR, CDS, coding, INTERNAL, intronic	NM_021215	RPRD1B	Memczak2013
chr11_108172375_108175579_+	hsa_circ_0005583	3205	497	Hs68_RNase, Hs68_control, Helas3, H1hesc, Bj, A549	None	ANNOTATED, CDS, coding, INTERNAL, OVCODE, OVEXON	NM_000051	ATM	Jeck2013, Salzman2013
chr13_36822743_36828280_-	hsa_circ_0029998	5538	230	K562	NA	ANNOTATED, CDS, coding, INTERNAL, OVCODE, OVEXON	NM_001198910	CCDC169-SOHLH2	Salzman2013
chr1_21377359_21415706_-	hsa_circ_0005075	38348	205	Hs68_RNase, Hs68_control, K562, Huvec, Hsmm, Hepg2, Helas3, H1hesc, Bj, Ag04450, A549, Nhlf, Sknshra, Mcf7	None	ANNOTATED, coding, INTERNAL, OVEXON, UTR5	NM_001198801	EIF4G3	Jeck2013, Salzman2013
chr17_44159807_44172067_-	hsa_circ_0006669	12261	12261	Hs68_RNase, Hs68_control, Nhek, K562, Huvec, Hepg2, H1hesc, Gm12878, Bj, Ag04450, A549, Sknshra	None	INTERGENIC	None	None	Jeck2013, Salzman2013
chr16_87448882_87452507_-	hsa_circ_0040773	3626	430	K562, Helas3, Sknshra	NA	ANNOTATED, CDS, coding, INTERNAL, OVCODE, OVEXON	NM_015144	ZCCHC14	Salzman2013
chr8_66534498_66539668_-	hsa_circ_0084622	5171	310	K562, Huvec, Gm12878	NA	ANNOTATED, CDS, coding, INTERNAL, OVCODE, OVEXON, UTR5	NM_018120	ARMC1	Salzman2013
chr9_78682871_78722267_+	hsa_circ_0087234	39397	576	H1hesc, A549	NA	ANNOTATED, CDS, coding, INTERNAL, OVCODE, OVEXON	NM_001190482	PCSK5	Salzman2013
chr8_141749117_141762415_-	hsa_circ_0003171	13299	493	Hs68_RNase, Hs68_control, K562, H1hesc, Gm12878, Bj, A549, Sknshra	None	ANNOTATED, CDS, coding, INTERNAL, OVCODE, OVEXON	NM_001199649	PTK2	Jeck2013, Salzman2013
chr6_136990421_137019820_-	hsa_circ_0009034	29400	754	Hs68_RNase, Hs68_control, K562, Hsmm, Hepg2, Gm12878, Bj, Ag04450, A549, Sknshra	None	ANNOTATED, CDS, coding, INTERNAL, OVCODE, OVEXON	NM_005923	MAP3K5	Jeck2013, Salzman2013
chr12_50829271_50835426_+	hsa_circ_0026235	6156	406	Gm12878	NA	ANNOTATED, CDS, coding, INTERNAL, OVCODE, OVERLAPTX, OVEXON	NM_052879	LARP4	Salzman2013
chrX_71681854_71684581_-	hsa_circ_0091065	2728	268	K562, Hepg2, Helas3, Bj, Nhek, Sknshra	NA	ANNOTATED, CDS, coding, INTERNAL, OVCODE, OVEXON	NM_018486	HDAC8	Salzman2013
chr11_33127113_33127610_-	hsa_circ_0000283	498	229	cd_19, Hs68_RNase, Hs68_control	None	ANNOTATED, CDS, coding, INTERNAL, OVCODE, OVEXON	NM_001326	CSTF3	Jeck2013, Memczak2013
chr17_19445706_19452990_+	hsa_circ_0042373	7285	363	Helas3, A549	NA	ANNOTATED, CDS, coding, INTERNAL, OVCODE, OVEXON	NM_018242	SLC47A1	Salzman2013
chr13_22088492_22113827_-	hsa_circ_0004268	25336	305	Hs68_RNase, Hs68_control	None	ANNOTATED, CDS, coding, INTERNAL, OVCODE, OVEXON	NM_152726	EFHA1	Jeck2013
chr14_89093182_89110855_-	hsa_circ_0032858	17674	712	Helas3, Bj, Ag04450, Sknshra, Mcf7	NA	ALT_ACCEPTOR, CDS, coding, INTERNAL, OVCODE, OVERLAPTX, OVEXON	NM_183387	EML5	Salzman2013
chr5_133493398_133509713_-	hsa_circ_0004145	16316	1204	Hs68_RNase, Hs68_control	None	ALT_DONOR, CDS, coding, INTERNAL, OVCODE, OVEXON, UTR3	NM_006930	SKP1	Jeck2013
chr8_27382879_27394372_+	hsa_circ_0083766	11494	184	K562, Hepg2, Helas3, H1hesc, Gm12878, A549, Sknshra	NA	ANNOTATED, CDS, coding, INTERNAL, OVCODE, OVEXON	NM_001979	EPHX2	Salzman2013
chr3_49884958_49885633_-	hsa_circ_0065760	676	142	Nhek, K562, Hepg2, Helas3, H1hesc, Gm12878, Bj, Ag04450, Sknshra	NA	ANNOTATED, CDS, coding, INTERNAL, OVCODE, OVEXON	NM_005879	TRAIP	Salzman2013
chrX_46529042_46541970_-	hsa_circ_0090360	12929	468	Gm12878, Sknshra	NA	ANNOTATED, CDS, coding, INTERNAL, OVCODE, OVERLAPTX, OVEXON	NM_032591	SLC9A7	Salzman2013
chrX_2184781_2343345_-	hsa_circ_0003473	158565	158565	Hs68_RNase, Hs68_control, K562, Huvec, Hsmm, Hepg2, Helas3, Gm12878, Bj, Ag04450, A549, Sknshra	None	INTERGENIC	None	None	Jeck2013, Salzman2013
chr4_123949341_124011860_+	hsa_circ_0005291	62520	471	Hs68_RNase, Hs68_control	None	ANNOTATED, CDS, coding, INTERNAL, OVCODE, OVEXON	NM_145207	SPATA5	Jeck2013
chr16_29906580_29907181_-	hsa_circ_0008535	602	342	Hs68_RNase, Hs68_control, Hepg2, Helas3, H1hesc, Ag04450, Sknshra	None	ANNOTATED, CDS, coding, INTERNAL, OVCODE, OVEXON	NM_001243332	SEZ6L2	Jeck2013, Salzman2013
chr15_76580187_76588078_-	hsa_circ_0036408	7892	412	Nhek, K562, Huvec, Hepg2, Helas3, H1hesc, Gm12878, Bj, Ag04450, A549, Sknshra, Mcf7	NA	ANNOTATED, CDS, coding, INTERNAL, OVCODE, OVEXON	NM_000126	ETFA	Salzman2013
chr7_42063067_42066011_-	hsa_circ_0079947	2945	469	Ag04450	NA	ANNOTATED, CDS, coding, INTERNAL, OVCODE, OVEXON	NM_000168	GLI3	Salzman2013
chr10_70411603_70433244_+	hsa_circ_0006753	21642	990	Hs68_RNase, Hs68_control	LINE	ALT_DONOR, CDS, coding, INTERNAL, intronic, OVCODE, OVEXON	NM_030625	TET1	Jeck2013
chr12_19626182_19646920_+	hsa_circ_0025555	20739	295	H1hesc	NA	ANNOTATED, CDS, coding, INTERNAL, OVCODE, OVERLAPTX, OVEXON	NM_153207	AEBP2	Salzman2013
chr17_76410960_76415806_+	hsa_circ_0045905	4847	329	K562, Hepg2, Helas3, H1hesc, Gm12878, Bj, Ag04450, Mcf7	NA	ALT_DONOR, CDS, coding, INTERNAL, intronic, OVCODE, OVEXON, UTR3	NM_024419	PGS1	Salzman2013
chr10_104119941_104120152_+	hsa_circ_0003839	212	212	Hs68_RNase, Hs68_control, Nhek, K562, Huvec, Hepg2, Helas3, H1hesc, Gm12878, Bj, Ag04450, A549, Sknshra	None	ANNOTATED, CDS, coding, INTERNAL, OVCODE, OVEXON	NM_004193	GBF1	Jeck2013, Salzman2013
chr3_155639976_155643155_+	hsa_circ_0067790	3180	242	K562, Helas3, H1hesc, Bj	NA	ANNOTATED, CDS, coding, INTERNAL, OVCODE, OVEXON	NM_003875	GMPS	Salzman2013
chr17_4109616_4139185_-	hsa_circ_0004402	29570	695	Hs68_RNase, Hs68_control, K562, Ag04450, A549	None	ANNOTATED, CDS, coding, INTERNAL, OVCODE, OVEXON	NM_016376	ANKFY1	Jeck2013, Salzman2013
chr1_65243306_65255197_+	hsa_circ_0012856	11892	789	K562, Hepg2, A549	NA	ANNOTATED, CDS, coding, INTERNAL, OVCODE, OVEXON	NM_018211	RAVER2	Salzman2013
chr5_171337576_171341409_-	hsa_circ_0004098	3834	289	Hs68_RNase, Hs68_control, K562, Gm12878, Ag04450, Sknshra	None	ANNOTATED, CDS, coding, INTERNAL, OVCODE, OVEXON	NM_033644	FBXW11	Jeck2013, Salzman2013
chr9_4286038_4286523_-	hsa_circ_0002874	486	486	Hs68_RNase, Hs68_control, K562, Huvec, Hsmm, Helas3, H1hesc, Gm12878, Bj, Ag04450, A549, Nhek, Nhlf, Sknshra	None	ANNOTATED, CDS, coding, INTERNAL, OVCODE, OVEXON, UTR5	NM_001042413	GLIS3	Jeck2013, Salzman2013
chr15_89656963_89659752_+	hsa_circ_0003679	2790	293	Hs68_RNase, Hs68_control	None	ALT_ACCEPTOR, CDS, coding, INTERNAL, OVCODE, OVEXON, UTR5	NM_007011	ABHD2	Jeck2013
chr4_4239554_4248070_-	hsa_circ_0005963	8517	410	Hs68_RNase, Hs68_control, K562, Huvec, Helas3, H1hesc, Gm12878, Bj, Ag04450, A549, Nhek	None	ANNOTATED, CDS, coding, INTERNAL, OVCODE, OVEXON, UTR3	NM_032927	TMEM128	Jeck2013, Salzman2013
chr3_142496474_142503882_+	hsa_circ_0067663	7409	665	Hsmm, Bj	NA	ANNOTATED, CDS, coding, INTERNAL, OVCODE, OVEXON	NM_001251845	TRPC1	Salzman2013
chr6_151226786_151247431_+	hsa_circ_0078277	20646	476	K562, Hepg2, H1hesc, Bj, Nhek, Sknshra	NA	ANNOTATED, CDS, coding, INTERNAL, OVCODE, OVEXON	NM_001242767	MTHFD1L	Salzman2013
chr10_128768966_128798571_+	hsa_circ_0002669	29606	939	Hs68_RNase, Hs68_control, Nhek, Huvec, Hepg2, Helas3, H1hesc, Bj, Ag04450, A549, Sknshra, Mcf7	None	ANNOTATED, CDS, coding, INTERNAL, OVCODE, OVEXON	NM_001380	DOCK1	Jeck2013, Salzman2013
chr6_20758826_20781496_+	hsa_circ_0075809	22671	170	Sknshra	NA	ANNOTATED, CDS, coding, INTERNAL, OVCODE, OVERLAPTX, OVEXON	NM_017774	CDKAL1	Salzman2013
chr18_12999420_13001581_+	hsa_circ_0046995	2162	294	K562, Huvec, Hepg2, H1hesc, Gm12878, Ag04450, Mcf7	NA	ANNOTATED, CDS, coding, INTERNAL, OVCODE, OVEXON, UTR5	NM_032142	CEP192	Salzman2013
chr10_11789348_11797607_+	hsa_circ_0017695	8260	421	K562, H1hesc, Bj, A549, Nhlf, Sknshra, Mcf7	NA	ANNOTATED, CDS, coding, INTERNAL, OVCODE, OVEXON	NM_024693	ECHDC3	Salzman2013
chr16_72122886_72124685_-	hsa_circ_0040414	1800	321	K562, Hepg2, Helas3, H1hesc, Gm12878, Ag04450, A549, Sknshra, Mcf7	NA	ANNOTATED, CDS, coding, INTERNAL, OVCODE, OVEXON, UTR5	NM_017853	TXNL4B	Salzman2013
chr1_43239234_43241150_+	hsa_circ_0004752	1917	490	Hs68_RNase, Hs68_control	None	ALT_DONOR, CDS, coding, INTERNAL, OVCODE, OVEXON, UTR3	NM_024097	C1orf50	Jeck2013
chr18_21644104_21663045_+	hsa_circ_0047270	18942	817	Nhek, Hmec, Hepg2, Helas3, H1hesc, Gm12878, Bj, Ag04450, A549, Sknshra	NA	ANNOTATED, CDS, coding, INTERNAL, OVCODE, OVERLAPTX, OVEXON	NM_001135993	TTC39C	Salzman2013
chr5_122881111_122893258_+	hsa_circ_0001522	12148	536	cd_19, cd_34, neutr, K562, Huvec, Hepg2, Helas3, H1hesc, Gm12878, Bj, Ag04450, A549, Nhek, Sknshra	None	ANNOTATED, CDS, coding, INTERNAL, UTR5	NM_001044723	CSNK1G3	Memczak2013, Salzman2013
chr11_68527037_68529155_-	hsa_circ_0023249	2119	360	K562, Huvec, Hepg2, Helas3, Gm12878, Bj, Ag04450, A549, Nhek, Sknshra	NA	ANNOTATED, CDS, coding, INTERNAL, OVCODE, OVEXON	NM_001876	CPT1A	Salzman2013
chr17_58538024_58539422_-	hsa_circ_0002496	1399	299	Hs68_RNase, Hs68_control, Nhek, H1hesc, Gm12878, Bj, Ag04450, Sknshra, Mcf7	None	ANNOTATED, CDS, coding, INTERNAL, OVCODE, OVEXON	NM_006380	APPBP2	Jeck2013, Salzman2013
chr10_120460818_120489922_-	hsa_circ_0002028	29105	429	Hs68_RNase, Hs68_control	None	ANNOTATED, CDS, coding, INTERNAL, OVCODE, OVEXON	NM_153810	C10orf46	Jeck2013
chr7_47384353_47385954_-	hsa_circ_0006229	1602	369	Hs68_RNase, Hs68_control, Huvec, Hepg2, Bj, Ag04450, A549, Sknshra, Mcf7	None	ANNOTATED, CDS, coding, INTERNAL, OVCODE, OVEXON	NM_022748	TNS3	Jeck2013, Salzman2013
chr21_35091102_35107509_+	hsa_circ_0061557	16408	378	Helas3	NA	ANNOTATED, CDS, coding, INTERNAL, OVCODE, OVERLAPTX, OVEXON, UTR5	NM_003024	ITSN1	Salzman2013
chr5_167927596_167929110_+	hsa_circ_0007958	1515	235	Hs68_RNase, Hs68_control, K562, Sknshra	None	ANNOTATED, CDS, coding, INTERNAL, OVCODE, OVEXON	NM_002887	RARS	Jeck2013, Salzman2013
chr7_6452442_6456552_-	hsa_circ_0006093	4111	351	Hs68_RNase, Hs68_control, Nhek, K562, Hepg2, Helas3, H1hesc, Gm12878, Bj, Ag04450, A549, Sknshra	None	ANNOTATED, CDS, coding, INTERNAL, OVCODE, OVEXON	NM_139179	DAGLB	Jeck2013, Salzman2013
chr9_5787061_5787593_-	hsa_circ_0005149	533	412	Hs68_RNase, Hs68_control	None	ALT_DONOR, CDS, coding, INTERNAL, OVCODE, OVEXON, UTR3	NM_024896	ERMP1	Jeck2013
chr16_27222467_27226329_+	hsa_circ_0005642	3863	2739	Hs68_RNase, Hs68_control	None	ALT_ACCEPTOR, CDS, coding, INTERNAL, intronic, OVCODE, OVEXON	NM_001145348	JMJD5	Jeck2013
chr14_105718844_105739231_-	hsa_circ_0005309	20388	279	Hs68_RNase, Hs68_control, K562, Huvec, Hsmm, Hepg2, Helas3, Gm12878, Bj, Ag04450, A549, Nhlf, Sknshra, Mcf7	None	ANNOTATED, CDS, coding, INTERNAL, OVCODE, OVEXON	NM_001519	BRF1	Jeck2013, Salzman2013
chr11_12525861_12535612_+	hsa_circ_0005295	9752	326	Hs68_RNase, Hs68_control	None	ANNOTATED, CDS, coding, INTERNAL, OVCODE, OVEXON	NM_018222	PARVA	Jeck2013
chr1_211952260_211966532_-	hsa_circ_0002274	14273	616	Hs68_RNase, Hs68_control, K562, Gm12878, Ag04450, A549, Sknshra	None	ANNOTATED, CDS, coding, INTERNAL, OVCODE, OVEXON	NM_014873	LPGAT1	Jeck2013, Salzman2013
chr7_131113792_131130662_+	hsa_circ_0082415	16871	678	K562, Hepg2, Gm12878, Bj, Ag04450, A549, Sknshra, Mcf7	NA	ANNOTATED, CDS, coding, INTERNAL, OVCODE, OVERLAPTX, OVEXON	NM_001145354	MKLN1	Salzman2013
chr8_29959414_29962002_+	hsa_circ_0007353	2589	263	Hs68_RNase, Hs68_control, Nhek, K562, Huvec, Hsmm, Hepg2, Helas3, H1hesc, Gm12878, Bj, Ag04450, A549, Nhlf, Sknshra, Mcf7	None	ANNOTATED, CDS, coding, INTERNAL, OVCODE, OVERLAPTX, OVEXON	NM_015344	LEPROTL1	Jeck2013, Salzman2013
chr17_28003838_28022541_-	hsa_circ_0042819	18704	322	Hsmm, Helas3, Gm12878, Ag04450	NA	ANNOTATED, CDS, coding, INTERNAL, OVCODE, OVERLAPTX, OVEXON	NM_033389	SSH2	Salzman2013
chr13_21619824_21620369_-	hsa_circ_0029693	546	546	H1hesc, Ag04450	NA	ANNOTATED, CDS, coding, INTERNAL, OVCODE, OVEXON, UTR5	NM_014572	LATS2	Salzman2013
chr21_45509714_45511930_+	hsa_circ_0061937	2217	228	A549	NA	ANNOTATED, CDS, coding, INTERNAL, OVCODE, OVEXON	NM_003274	TRAPPC10	Salzman2013
chr4_88964385_88964609_+	hsa_circ_0003786	225	225	Hs68_RNase, Hs68_control, H1hesc, Ag04450, A549, Sknshra	None	ANNOTATED, CDS, coding, INTERNAL, OVCODE, OVEXON	NM_000297	PKD2	Jeck2013, Salzman2013
chr11_78176922_78204241_-	hsa_circ_0005935	27320	475	Hs68_RNase, Hs68_control, K562, Hepg2, Helas3, H1hesc, Gm12878, Bj, Ag04450, A549, Sknshra, Mcf7	None	ANNOTATED, CDS, coding, INTERNAL, OVCODE, OVEXON	NM_024678	NARS2	Jeck2013, Salzman2013
chr10_93754292_93768032_+	hsa_circ_0008148	13741	614	Hs68_RNase, Hs68_control	None	ANNOTATED, CDS, coding, INTERNAL, OVCODE, OVEXON	NM_003972	BTAF1	Jeck2013
chr20_17936009_17937681_-	hsa_circ_0004816	1673	216	Hs68_RNase, Hs68_control, Nhek, K562, Huvec, Hepg2, Helas3, H1hesc, Gm12878, Bj, Ag04450, A549, Nhlf, Sknshra, Mcf7	None	ANNOTATED, CDS, coding, INTERNAL, OVCODE, OVEXON	NM_152227	SNX5	Jeck2013, Salzman2013
chr17_43552466_43553092_-	hsa_circ_0044177	627	627	Nhek, K562, Hsmm, Hepg2, Helas3, H1hesc, Gm12878, Bj, Ag04450, A549	NA	INTERGENIC	None	None	Salzman2013
chr10_116247717_116251637_-	hsa_circ_0020072	3921	147	Hepg2, Helas3, A549	NA	ANNOTATED, CDS, coding, INTERNAL, OVCODE, OVEXON	NM_001003408	ABLIM1	Salzman2013
chr6_57244699_57398317_+	hsa_circ_0002709	153619	561	Hs68_RNase, Hs68_control	None	ANNOTATED, CDS, coding, INTERNAL, OVCODE, OVEXON	NM_000947	PRIM2	Jeck2013
chr9_97555047_97563284_+	hsa_circ_0087589	8238	400	K562, Hsmm, H1hesc, Gm12878, A549, Sknshra, Mcf7	NA	ANNOTATED, CDS, coding, INTERNAL, OVCODE, OVEXON	NM_001193331	C9orf3	Salzman2013
chr14_75576388_75585638_-	hsa_circ_0032673	9251	658	K562, Huvec, Hepg2, Helas3, A549, Sknshra	NA	ANNOTATED, CDS, coding, INTERNAL, OVCODE, OVEXON	NM_033116	NEK9	Salzman2013
chr17_80828100_80851508_+	hsa_circ_0046522	23409	331	K562, Huvec, Hepg2, Helas3, H1hesc, Gm12878, Bj, A549	NA	ANNOTATED, CDS, coding, INTERNAL, OVCODE, OVEXON	NM_005993	TBCD	Salzman2013
chr16_14645878_14687235_-	hsa_circ_0037957	41358	640	H1hesc	NA	ANNOTATED, CDS, coding, INTERNAL, OVCODE, OVEXON	NM_002582	PARN	Salzman2013
chr15_41988273_41991357_+	hsa_circ_0000592	3085	1124	cd_19, Hs68_RNase, Hs68_control, Nhek, K562, Hepg2, Helas3, H1hesc, Gm12878, Bj, Ag04450, A549, Sknshra	None	ANNOTATED, CDS, coding, INTERNAL, OVCODE, OVEXON	NM_001164273	MGA	Jeck2013, Memczak2013, Salzman2013
chr6_151330955_151358253_+	hsa_circ_0002697	27299	722	Hs68_RNase, Hs68_control, K562, Hepg2, H1hesc, Bj, Ag04450, A549	None	ANNOTATED, CDS, coding, INTERNAL, OVCODE, OVEXON	NM_001242767	MTHFD1L	Jeck2013, Salzman2013
chr7_618893_647089_-	hsa_circ_0079040	28197	451	H1hesc, A549	NA	ANNOTATED, CDS, coding, INTERNAL, OVCODE, OVERLAPTX, OVEXON	NM_001164761	PRKAR1B	Salzman2013
chr20_62407031_62422143_-	hsa_circ_0002805	15113	1255	Hs68_RNase, Hs68_control, K562, Hsmm, Hepg2, Helas3, H1hesc, Gm12878, Bj, Ag04450, A549, Nhlf, Mcf7	None	ANNOTATED, CDS, coding, INTERNAL, OVCODE, OVEXON, UTR5	NM_025224	ZBTB46	Jeck2013, Salzman2013
chr14_67431908_67525503_+	hsa_circ_0032254	93596	316	Hsmm, Hepg2, Helas3, H1hesc, Gm12878, Bj, A549, Sknshra, Mcf7	NA	ANNOTATED, CDS, coding, INTERNAL, OVCODE, OVERLAPTX, OVEXON	NM_020806	GPHN	Salzman2013
chr1_61798184_61824946_+	hsa_circ_0012758	26763	321	Helas3	NA	ANNOTATED, CDS, coding, INTERNAL, OVCODE, OVERLAPTX, OVEXON	NM_001134673	NFIA	Salzman2013
chr5_138979957_138994551_+	hsa_circ_0005728	14595	280	Hs68_RNase, Hs68_control, K562, Huvec, Hepg2, Helas3, H1hesc, Gm12878, Bj, Ag04450, A549, Nhek, Sknshra	None	ANNOTATED, CDS, coding, INTERNAL, OVCODE, OVEXON, UTR5	NM_181838	UBE2D2	Jeck2013, Salzman2013
chr3_47466975_47470160_-	hsa_circ_0007291	3186	785	Hs68_RNase, Hs68_control, Nhek, K562, Huvec, Hepg2, Helas3, H1hesc, Gm12878, Bj, Ag04450, Nhlf, Sknshra, Mcf7	None	ANNOTATED, CDS, coding, INTERNAL, OVCODE, OVEXON	NM_012235	SCAP	Jeck2013, Salzman2013
chr2_10928823_10930015_-	hsa_circ_0052620	1193	299	K562, Gm12878	NA	ANNOTATED, CDS, coding, INTERNAL, OVCODE, OVEXON	NM_005742	PDIA6	Salzman2013
chr21_16386665_16415895_-	hsa_circ_0004771	29231	203	Hs68_RNase, Hs68_control, Nhek, K562, Huvec, Hepg2, Helas3, H1hesc, Gm12878, Bj, Ag04450, A549, Sknshra, Mcf7	None	ANNOTATED, coding, INTERNAL, OVEXON, UTR5	NM_003489	NRIP1	Jeck2013, Salzman2013
chr17_11958206_12016677_+	hsa_circ_0005603	58472	698	Hs68_RNase, Hs68_control, Nhek, H1hesc, Gm12878, Bj, Ag04450, A549, Sknshra	None	ANNOTATED, CDS, coding, INTERNAL, OVCODE, OVEXON	NM_003010	MAP2K4	Jeck2013, Salzman2013
chr2_38570410_38570654_-	hsa_circ_0054134	245	245	K562, A549	NA	ANNOTATED, CDS, coding, INTERNAL, OVCODE, OVERLAPTX, OVEXON	NM_022374	ATL2	Salzman2013
chr11_9309249_9316934_-	hsa_circ_0021157	7686	328	Gm12878, Nhek, Sknshra	NA	ANNOTATED, CDS, coding, INTERNAL, OVCODE, OVERLAPTX, OVEXON	NM_015012	TMEM41B	Salzman2013
chr20_52773708_52788209_-	hsa_circ_0060927	14502	1106	Nhek, Hmec, Hepg2, Helas3, Ag04450, A549, Sknshra, Mcf7	NA	ANNOTATED, CDS, coding, INTERNAL, OVCODE, OVEXON, UTR3	NM_000782	CYP24A1	Salzman2013
chr9_114341076_114348445_-	hsa_circ_0003731	7370	442	Hs68_RNase, Hs68_control	None	ANNOTATED, CDS, coding, INTERNAL, OVCODE, OVEXON	NM_001146108	PTGR1	Jeck2013
chr6_160205698_160209175_-	hsa_circ_0005388	3478	606	Hs68_RNase, Hs68_control	None	ANNOTATED, CDS, coding, INTERNAL, OVCODE, OVEXON	NM_030752	TCP1	Jeck2013
chr3_195101738_195112876_-	hsa_circ_0007331	11139	232	Hs68_RNase, Hs68_control, Nhek, K562, Huvec, Helas3, H1hesc, Gm12878, Bj, Ag04450, A549, Sknshra	None	ANNOTATED, CDS, coding, INTERNAL, OVCODE, OVEXON	NM_012287	ACAP2	Jeck2013, Salzman2013
chr8_10683662_10692285_-	hsa_circ_0083327	8624	375	K562, A549	NA	ANNOTATED, CDS, coding, INTERNAL, OVCODE, OVEXON	NM_017884	PINX1	Salzman2013
chr1_233372591_233388534_-	hsa_circ_0016991	15944	524	Nhek	NA	ANNOTATED, CDS, coding, INTERNAL, OVCODE, OVEXON	NM_014801	PCNXL2	Salzman2013
chr16_85667520_85667738_+	hsa_circ_0000722	219	219	cd_19, cd_34, Hs68_RNase, Hs68_control	None	ANNOTATED, CDS, coding, INTERNAL, OVCODE, OVEXON	NM_014615	KIAA0182	Jeck2013, Memczak2013
chr16_11873022_11876244_-	hsa_circ_0005420	3223	340	Hs68_RNase, Hs68_control, Gm12878, Bj	None	ANNOTATED, CDS, coding, INTERNAL, OVCODE, OVEXON, UTR5	NM_014153	ZC3H7A	Jeck2013, Salzman2013
chr1_23376880_23385660_+	hsa_circ_0003889	8781	590	Hs68_RNase, Hs68_control, K562, Helas3, H1hesc, Gm12878, Bj, Ag04450, A549, Sknshra	None	ANNOTATED, CDS, coding, INTERNAL, OVCODE, OVERLAPTX, OVEXON	NM_001009999	KDM1A	Jeck2013, Salzman2013
chr14_62188227_62188541_+	hsa_circ_0007976	315	231	Hs68_RNase, Hs68_control, Nhek, K562, Huvec, Helas3, H1hesc, Gm12878, Bj, Ag04450, A549, Sknshra	None	ANNOTATED, CDS, coding, INTERNAL, OVCODE, OVEXON	NM_001530	HIF1A	Jeck2013, Salzman2013
chr1_179972309_179975702_+	hsa_circ_0003942	3394	228	Hs68_RNase, Hs68_control, K562, Hmec, Ag04450	None	ANNOTATED, CDS, coding, INTERNAL, OVCODE, OVEXON	NM_014810	CEP350	Jeck2013, Salzman2013
chr2_48701822_48718309_+	hsa_circ_0008358	16488	511	Hs68_RNase, Hs68_control, Nhek, H1hesc, Gm12878, Bj	None	ANNOTATED, INTERNAL, ncRNA, OVCODE, OVEXON	NR_024188	PPP1R21	Jeck2013, Salzman2013
chr2_33002949_33012216_+	hsa_circ_0053882	9268	318	K562, Bj	NA	ANNOTATED, CDS, coding, INTERNAL, OVCODE, OVEXON	NM_017735	TTC27	Salzman2013
chr2_110342703_110350696_-	hsa_circ_0008953	7994	383	Hs68_RNase, Hs68_control, Nhek, Hepg2, Helas3, Bj, Ag04450	None	ANNOTATED, CDS, coding, INTERNAL, OVCODE, OVEXON	NM_144710	SEPT10	Jeck2013, Salzman2013
chr2_61340905_61345251_+	hsa_circ_0001014	4347	2493	cd_19	LINE	ALT_ACCEPTOR, CDS, coding, INTERNAL, intronic	NM_001129993	KIAA1841	Memczak2013
chr13_46090278_46104053_+	hsa_circ_0030185	13776	549	Bj	NA	ANNOTATED, CDS, coding, INTERNAL, OVCODE, OVERLAPTX, OVEXON	NM_031431	COG3	Salzman2013
chr17_61417462_61432751_+	hsa_circ_0045194	15290	1007	Hepg2, Bj, Ag04450, A549	NA	ANNOTATED, CDS, coding, INTERNAL, OVCODE, OVERLAPTX, OVEXON	NM_025185	TANC2	Salzman2013
chr1_70650468_70654956_-	hsa_circ_0006450	4489	386	Hs68_RNase, Hs68_control	None	ANNOTATED, CDS, coding, INTERNAL, OVCODE, OVEXON	NM_017768	LRRC40	Jeck2013
chr7_156758964_156759786_+	hsa_circ_0004210	823	265	Hs68_RNase, Hs68_control	None	ANNOTATED, CDS, coding, INTERNAL, OVCODE, OVEXON	NM_138400	NOM1	Jeck2013
chrX_23748644_23751334_-	hsa_circ_0090095	2691	255	K562, Hepg2, Gm12878, Bj, Ag04450, Nhek	NA	ANNOTATED, CDS, coding, INTERNAL, OVCODE, OVEXON	NM_001037171	ACOT9	Salzman2013
chr5_68400458_68410323_+	hsa_circ_0005839	9866	339	Hs68_RNase, Hs68_control	None	ANNOTATED, CDS, coding, INTERNAL, OVCODE, OVEXON	NM_022902	SLC30A5	Jeck2013
chrX_16836697_16838378_+	hsa_circ_0006020	1682	396	Hs68_RNase, Hs68_control	None	ANNOTATED, CDS, coding, INTERNAL, OVCODE, OVEXON	NM_018360	TXLNG	Jeck2013
chr2_72945232_72960247_-	hsa_circ_0009043	15016	390	Hs68_RNase, Hs68_control, Nhek, H1hesc, Gm12878, Ag04450, A549, Nhlf, Sknshra	None	ANNOTATED, CDS, coding, INTERNAL, OVCODE, OVEXON	NM_015189	EXOC6B	Jeck2013, Salzman2013
chr11_47774468_47776216_-	hsa_circ_0004075	1749	324	Hs68_RNase, Hs68_control, K562, Hepg2, Helas3, H1hesc, Gm12878, Bj, Ag04450, A549, Nhek, Sknshra	None	ANNOTATED, CDS, coding, INTERNAL, OVCODE, OVEXON	NM_015308	FNBP4	Jeck2013, Salzman2013
chr8_48866180_48869991_-	hsa_circ_0084464	3812	567	Nhek, K562, Hepg2, Helas3, H1hesc, Gm12878, Bj, Ag04450, A549, Sknshra	NA	ANNOTATED, CDS, coding, INTERNAL, OVCODE, OVEXON	NM_006904	PRKDC	Salzman2013
chr12_50821545_50835426_+	hsa_circ_0026228	13882	786	K562, Bj	NA	ANNOTATED, CDS, coding, INTERNAL, OVCODE, OVERLAPTX, OVEXON	NM_052879	LARP4	Salzman2013
chr12_102291641_102295211_+	hsa_circ_0004459	3571	211	Hs68_RNase, Hs68_control, Nhek, K562, Hepg2, Gm12878, Bj, Ag04450, A549, Sknshra	None	ANNOTATED, CDS, coding, INTERNAL, OVCODE, OVEXON	NM_018370	DRAM1	Jeck2013, Salzman2013
chr17_7849046_7849304_+	hsa_circ_0008310	259	259	Hs68_RNase, Hs68_control, Nhek, K562, Huvec, Hsmm, Hepg2, Helas3, Gm12878, Bj, Ag04450, A549, Nhlf, Sknshra	None	ANNOTATED, CDS, coding, INTERNAL, OVCODE, OVEXON	NM_001037144	CNTROB	Jeck2013, Salzman2013
chr7_30590252_30601744_-	hsa_circ_0001693	11493	11493	cd_34, Hs68_RNase, Hs68_control	None	ANTISENSE, downstream_end, ncRNA, OVERLAPTX, OVEXON	TCONS_00012989	TCONS_00012989	Jeck2013, Memczak2013
chr7_50737419_50778687_-	hsa_circ_0009059	41269	6304	Hs68_RNase, Hs68_control	LINE	ALT_ACCEPTOR, CDS, coding, OVCODE, OVEXON, upstream_start, UTR5	NM_001001550	GRB10	Jeck2013
chr10_116879949_116889297_+	hsa_circ_0020093	9349	536	H1hesc, A549, Sknshra, Mcf7	NA	ANNOTATED, CDS, coding, INTERNAL, OVCODE, OVEXON	NM_207303	ATRNL1	Salzman2013
chr2_15467874_15470889_-	hsa_circ_0052728	3016	403	K562	NA	ANNOTATED, CDS, coding, INTERNAL, OVCODE, OVEXON	NM_015909	NBAS	Salzman2013
chr20_17937577_17941969_-	hsa_circ_0009173	4393	4393	Hs68_RNase, Hs68_control	None	ALT_ACCEPTOR, CDS, coding, INTERNAL, intronic, OVCODE, OVEXON	NM_152227	SNX5	Jeck2013
chr3_51497130_51517852_-	hsa_circ_0065916	20723	383	K562, H1hesc	NA	ANNOTATED, CDS, coding, INTERNAL, OVCODE, OVEXON, UTR5	NM_014703	VPRBP	Salzman2013
chr12_42768665_42792796_+	hsa_circ_0003961	24132	610	Hs68_RNase, Hs68_control	None	ANNOTATED, CDS, coding, INTERNAL, OVCODE, OVEXON	NM_016488	PPHLN1	Jeck2013
chr3_15776917_15793327_-	hsa_circ_0064516	16411	360	K562, Gm12878, Bj, Ag04450	NA	ANNOTATED, CDS, coding, INTERNAL, OVCODE, OVERLAPTX, OVEXON, UTR5	NM_001195098	ANKRD28	Salzman2013
chr17_58700882_58711338_+	hsa_circ_0002598	10457	354	Hs68_RNase, Hs68_control, K562, Helas3, H1hesc, Mcf7	None	ANNOTATED, CDS, coding, INTERNAL, OVCODE, OVEXON	NM_003620	PPM1D	Jeck2013, Salzman2013
chr1_243385026_243388623_-	hsa_circ_0005749	3598	236	Hs68_RNase, Hs68_control, K562, Helas3, Gm12878, Ag04450, A549, Sknshra	None	ANNOTATED, CDS, coding, INTERNAL, OVCODE, OVEXON, UTR5	NM_014812	CEP170	Jeck2013, Salzman2013
chr9_88211277_88248289_-	hsa_circ_0007162	37013	1121	Hs68_RNase, Hs68_control, Helas3, Gm12878	None	ANNOTATED, CDS, coding, INTERNAL, OVCODE, OVEXON	NM_015239	AGTPBP1	Jeck2013, Salzman2013
chr3_41265512_41268843_+	hsa_circ_0004194	3332	1129	Hs68_RNase, Hs68_control, Nhek, K562, Hepg2, Helas3, H1hesc, Gm12878, Bj, Ag04450, Sknshra	None	ANNOTATED, CDS, coding, INTERNAL, OVCODE, OVEXON, UTR5	NM_001904	CTNNB1	Jeck2013, Salzman2013
chr2_215632206_215634036_-	hsa_circ_0058049	1831	254	K562, Hepg2, Helas3, H1hesc, Gm12878, Ag04450, Mcf7	NA	ANNOTATED, CDS, coding, INTERNAL, OVCODE, OVEXON	NM_000465	BARD1	Salzman2013
chr9_138758302_138774924_-	hsa_circ_0006814	16623	506	Hs68_RNase, Hs68_control, K562, Helas3, H1hesc, Gm12878, Ag04450, Sknshra	None	ANNOTATED, CDS, coding, INTERNAL, OVCODE, OVEXON	NM_015447	CAMSAP1	Jeck2013, Salzman2013
chr1_46543187_46546422_-	hsa_circ_0003161	3236	208	Hs68_RNase, Hs68_control, K562	None	ANNOTATED, CDS, coding, INTERNAL, OVCODE, OVEXON	NM_003629	PIK3R3	Jeck2013, Salzman2013
chr12_111947353_111948386_-	hsa_circ_0002601	1034	377	Hs68_RNase, Hs68_control, Nhek, K562, Sknshra	None	ANNOTATED, CDS, coding, INTERNAL, OVCODE, OVEXON	NM_002973	ATXN2	Jeck2013, Salzman2013
chr15_69709722_69714774_+	hsa_circ_0004252	5053	482	Hs68_RNase, Hs68_control	None	ANNOTATED, CDS, coding, INTERNAL, OVCODE, OVEXON	NM_138555	KIF23	Jeck2013
chr19_52579297_52592255_-	hsa_circ_0008749	12959	414	Hs68_RNase, Hs68_control	DNA	ANNOTATED, CDS, coding, INTERNAL, OVCODE, OVEXON, UTR5	NM_001136499	ZNF841	Jeck2013
chr13_114174931_114188555_+	hsa_circ_0005161	13625	314	Hs68_RNase, Hs68_control, Hepg2, H1hesc, Ag04450	None	ANNOTATED, CDS, coding, INTERNAL, OVCODE, OVEXON	NM_017905	TMCO3	Jeck2013, Salzman2013
chr2_203818728_203820481_+	hsa_circ_0003493	1754	215	Hs68_RNase, Hs68_control, H1hesc, Gm12878	None	ANNOTATED, CDS, coding, INTERNAL, OVCODE, OVEXON	NM_024744	ALS2CR8	Jeck2013, Salzman2013
chr2_148653870_148657467_+	hsa_circ_0001073	3598	473	HEK293, cd_19, cd_34, Hs68_RNase, Hs68_control, Nhek, K562, Huvec, Hepg2, Helas3, H1hesc, Gm12878, Bj, Ag04450, A549, Sknshra	None	ANNOTATED, CDS, coding, INTERNAL, OVCODE, OVEXON	NM_001616	ACVR2A	Jeck2013, Memczak2013, Salzman2013
chrX_24190832_24197887_+	hsa_circ_0007108	7056	674	Hs68_RNase, Hs68_control, K562, Huvec, Hmec, Hepg2, Helas3, H1hesc, Gm12878, Bj, Ag04450, A549, Nhek, Sknshra, Mcf7	None	ANNOTATED, CDS, coding, INTERNAL, OVCODE, OVEXON, UTR5	NM_001178085	ZFX	Jeck2013, Salzman2013
chr17_65850056_65850878_+	hsa_circ_0045431	823	823	K562, H1hesc, Gm12878, Ag04450	NA	ANNOTATED, CDS, coding, INTERNAL, OVCODE, OVEXON	NM_182641	BPTF	Salzman2013
chr2_236706403_236715975_+	hsa_circ_0058806	9573	377	K562, Huvec, Hepg2, Helas3, H1hesc, Ag04450, A549, Sknshra, Mcf7	NA	ANNOTATED, CDS, coding, INTERNAL, OVCODE, OVEXON	NM_001037131	AGAP1	Salzman2013
chr5_31421379_31424578_-	hsa_circ_0005524	3200	309	Hs68_RNase, Hs68_control, K562, Huvec, Hepg2, Helas3, H1hesc, Gm12878, Bj, Ag04450, A549, Nhek, Sknshra, Mcf7	None	ANNOTATED, CDS, coding, INTERNAL, OVCODE, OVEXON	NM_013235	DROSHA	Jeck2013, Salzman2013
chr9_134330463_134334743_+	hsa_circ_0007613	4281	284	Hs68_RNase, Hs68_control, K562, Hepg2, Helas3, Gm12878, Ag04450, A549, Nhek, Sknshra	None	ANNOTATED, CDS, coding, INTERNAL, OVCODE, OVEXON	NM_013318	PRRC2B	Jeck2013, Salzman2013
chr5_14316622_14336836_+	hsa_circ_0005260	20215	546	Hs68_RNase, Hs68_control, Huvec, Hsmm, Hepg2, Helas3, H1hesc, Gm12878, Bj, Ag04450, A549, Nhek, Sknshra, Mcf7	None	ANNOTATED, CDS, coding, INTERNAL, OVCODE, OVEXON	NM_007118	TRIO	Jeck2013, Salzman2013
chr3_122422589_122427115_+	hsa_circ_0006132	4527	538	Hs68_RNase, Hs68_control	None	ANNOTATED, CDS, coding, INTERNAL, OVCODE, OVEXON	NM_017554	PARP14	Jeck2013
chr5_132400672_132409818_+	hsa_circ_0008513	9147	556	Hs68_RNase, Hs68_control	None	ANNOTATED, CDS, coding, INTERNAL, OVCODE, OVEXON	NM_002154	HSPA4	Jeck2013
chr1_78183552_78191447_-	hsa_circ_0000087	7896	783	cd_19, Hs68_RNase, Hs68_control, Nhek, K562, Hepg2, Helas3, H1hesc, Gm12878, Bj, Ag04450, A549, Sknshra, Mcf7	None	ANNOTATED, CDS, coding, INTERNAL, OVCODE, OVEXON	NM_201624	USP33	Jeck2013, Memczak2013, Salzman2013
chr7_157015948_157018233_+	hsa_circ_0007864	2286	231	Hs68_RNase, Hs68_control	None	ANNOTATED, CDS, coding, INTERNAL, OVCODE, OVEXON	NM_014671	UBE3C	Jeck2013
chr7_75182752_75183825_-	hsa_circ_0080712	1074	332	Huvec, Hepg2, H1hesc, Ag04450, A549, Sknshra	NA	ANNOTATED, CDS, coding, INTERNAL, OVCODE, OVEXON	NM_005338	HIP1	Salzman2013
chr2_240158289_240274613_-	hsa_circ_0058912	116325	313	K562, Hepg2, Helas3, H1hesc, Gm12878, Bj, Ag04450, Sknshra	NA	ANNOTATED, CDS, coding, INTERNAL, OVCODE, OVERLAPTX, OVEXON, UTR5	NM_006037	HDAC4	Salzman2013
chr19_34921481_34924317_+	hsa_circ_0050509	2837	220	K562, Helas3, H1hesc, Gm12878, Bj, Ag04450, A549, Sknshra	NA	ANNOTATED, CDS, coding, INTERNAL, OVCODE, OVERLAPTX, OVEXON	NM_005499	UBA2	Salzman2013
chr15_72810408_72837305_+	hsa_circ_0006314	26898	213	Hs68_RNase, Hs68_control	None	ANNOTATED, CDS, coding, INTERNAL, OVCODE, OVEXON	NM_005744	ARIH1	Jeck2013
chr5_131552890_131554337_-	hsa_circ_0008530	1448	349	Hs68_RNase, Hs68_control	None	ANNOTATED, CDS, coding, INTERNAL, OVCODE, OVEXON, UTR5	NM_004199	P4HA2	Jeck2013
chr19_17212470_17213367_+	hsa_circ_0000907	898	898	cd_19, cd_34, Hs68_RNase, Hs68_control, K562, Huvec, Hsmm, Hmec, Hepg2, Helas3, H1hesc, Gm12878, Bj, Ag04450, A549, Nhek, Nhlf, Sknshra, Mcf7	None	ANNOTATED, CDS, coding, INTERNAL, OVCODE, OVEXON, UTR5	NM_004145	MYO9B	Jeck2013, Memczak2013, Salzman2013
chr2_172182351_172188377_-	hsa_circ_0004384	6027	377	Hs68_RNase, Hs68_control	None	ANNOTATED, CDS, coding, INTERNAL, OVCODE, OVEXON	NM_024770	METTL8	Jeck2013
chr9_96238538_96261168_+	hsa_circ_0003972	22631	309	Hs68_RNase, Hs68_control, K562, Huvec, Helas3, H1hesc, Gm12878, Bj, Ag04450, A549, Sknshra	None	ANNOTATED, CDS, coding, INTERNAL, OVCODE, OVEXON	NM_014612	FAM120A	Jeck2013, Salzman2013
chr2_198324656_198327455_+	hsa_circ_0057657	2800	343	Nhek	NA	ANNOTATED, CDS, coding, INTERNAL, OVCODE, OVEXON	NM_025147	COQ10B	Salzman2013
chr17_1540003_1540356_-	hsa_circ_0000732	354	269	cd_34, neutr, K562, Huvec, Hepg2, Helas3, Gm12878, Ag04450	None	ANNOTATED, CDS, coding, INTERNAL	NM_003693	SCARF1	Memczak2013, Salzman2013
chr3_136183723_136221621_-	hsa_circ_0067480	37899	637	K562, Helas3, H1hesc, Gm12878	NA	ANNOTATED, CDS, coding, INTERNAL, OVCODE, OVERLAPTX, OVEXON	NM_005862	STAG1	Salzman2013
chr7_158552177_158557544_-	hsa_circ_0001776	5368	495	cd_19, cd_34, neutr, Hs68_RNase, Hs68_control, Nhek, K562, Huvec, Hepg2, Helas3, Gm12878, Bj, Ag04450, A549, Sknshra, Mcf7	None	ANNOTATED, CDS, coding, INTERNAL, OVCODE, OVEXON	NM_020728	ESYT2	Jeck2013, Memczak2013, Salzman2013
chr10_99416042_99416731_+	hsa_circ_0005111	690	286	Hs68_RNase, Hs68_control, Nhek, K562, Huvec, Helas3, H1hesc, Gm12878, Ag04450, A549, Nhlf	None	ANNOTATED, CDS, coding, INTERNAL, OVCODE, OVEXON	NM_018425	PI4K2A	Jeck2013, Salzman2013
chr14_75136352_75138186_-	hsa_circ_0005030	1835	492	Hs68_RNase, Hs68_control, Nhek, K562, Gm12878, Bj, Ag04450, Sknshra	None	ANNOTATED, CDS, coding, INTERNAL, OVCODE, OVEXON	NM_001039479	KIAA0317	Jeck2013, Salzman2013
chr17_45741525_45752148_+	hsa_circ_0000780	10624	1126	HEK293, cd_19, cd_34, Hs68_RNase, Hs68_control, Nhek, K562, Hsmm, Hepg2, H1hesc, Gm12878, Bj, Ag04450, A549, Sknshra, Mcf7	None	ANNOTATED, CDS, coding, INTERNAL, OVCODE, OVEXON	NM_002265	KPNB1	Jeck2013, Memczak2013, Salzman2013
chr20_33065577_33067594_+	hsa_circ_0059958	2018	249	Nhek, K562, Hepg2, Helas3, H1hesc, Gm12878, Bj, Ag04450, A549, Sknshra	NA	ANNOTATED, CDS, coding, INTERNAL, OVCODE, OVEXON	NM_031483	ITCH	Salzman2013
chr12_57127931_57133147_-	hsa_circ_0027108	5217	261	K562	NA	ANNOTATED, CDS, coding, INTERNAL, OVCODE, OVEXON	NM_000946	PRIM1	Salzman2013
chr16_532525_546859_+	hsa_circ_0002774	14335	398	Hs68_RNase, Hs68_control, K562, Hsmm, Hepg2, Helas3, H1hesc, Gm12878, Bj, Ag04450, A549, Sknshra	None	ANNOTATED, CDS, coding, INTERNAL, OVCODE, OVEXON	NM_014700	RAB11FIP3	Jeck2013, Salzman2013
chr12_12332744_12340053_-	hsa_circ_0008932	7310	898	Hs68_RNase, Hs68_control, K562, Hepg2, H1hesc, Ag04450	None	ANNOTATED, CDS, coding, INTERNAL, OVCODE, OVEXON	NM_002336	LRP6	Jeck2013, Salzman2013
chr17_28808161_28819771_+	hsa_circ_0042839	11611	484	Ag04450	NA	ANNOTATED, CDS, coding, INTERNAL, OVCODE, OVEXON	NM_004871	GOSR1	Salzman2013
chr2_32108455_32157204_-	hsa_circ_0004215	48750	514	Hs68_RNase, Hs68_control, K562, Huvec, Hepg2, Helas3, H1hesc, Gm12878, Ag04450, A549, Sknshra	None	ANNOTATED, CDS, coding, INTERNAL, OVCODE, OVEXON	NM_015955	MEMO1	Jeck2013, Salzman2013
chr17_29550462_29554624_+	hsa_circ_0003586	4163	688	Hs68_RNase, Hs68_control, K562, H1hesc, Gm12878, Ag04450	None	ANNOTATED, CDS, coding, INTERNAL, OVCODE, OVEXON	NM_001042492	NF1	Jeck2013, Salzman2013
chr17_18768782_18814564_+	hsa_circ_0004488	45783	861	Hs68_RNase, Hs68_control, K562, Hepg2, Gm12878, Bj, A549, Sknshra, Mcf7	None	ANNOTATED, CDS, coding, INTERNAL, OVCODE, OVEXON, UTR5	NM_002767	PRPSAP2	Jeck2013, Salzman2013
chr5_158621724_158630664_-	hsa_circ_0074828	8941	332	Ag04450, A549	NA	ANNOTATED, CDS, coding, INTERNAL, OVCODE, OVEXON, UTR5	NM_001199383	RNF145	Salzman2013
chr15_94927251_94945248_+	hsa_circ_0037010	17998	503	Gm12878	NA	ANNOTATED, CDS, coding, INTERNAL, OVCODE, OVEXON	NM_018349	MCTP2	Salzman2013
chr5_93964516_93966448_+	hsa_circ_0073371	1933	431	K562, Hepg2, Helas3, Ag04450, A549, Sknshra	NA	ANNOTATED, CDS, coding, INTERNAL, OVCODE, OVEXON	NM_032290	ANKRD32	Salzman2013
chr13_26923209_26928017_+	hsa_circ_0029804	4809	252	Gm12878, Ag04450	NA	ANNOTATED, CDS, coding, INTERNAL, OVCODE, OVEXON	NM_001260	CDK8	Salzman2013
chr11_118940944_118944661_+	hsa_circ_0009166	3718	766	Hs68_RNase, Hs68_control, Helas3, Gm12878, Ag04450	None	ANNOTATED, CDS, coding, INTERNAL, OVCODE, OVEXON	NM_021729	VPS11	Jeck2013, Salzman2013
chr1_212216335_212220759_+	hsa_circ_0006862	4425	408	Hs68_RNase, Hs68_control	None	ANNOTATED, CDS, coding, INTERNAL, OVCODE, OVEXON	NM_016448	DTL	Jeck2013
chr19_49348627_49355583_-	hsa_circ_0051782	6957	417	K562, Hepg2, Ag04450	NA	ANNOTATED, CDS, coding, INTERNAL, OVCODE, OVEXON	NM_020904	PLEKHA4	Salzman2013
chr7_83739786_83823984_-	hsa_circ_0004363	84199	535	Hs68_RNase, Hs68_control	None	ALT_ACCEPTOR, CDS, coding, INTERNAL, OVCODE, OVEXON, UTR5	NM_006080	SEMA3A	Jeck2013
chr6_160819011_160831878_+	hsa_circ_0078607	12868	546	Hepg2, Helas3, H1hesc, A549	NA	ANNOTATED, CDS, coding, INTERNAL, OVCODE, OVEXON	NM_021977	SLC22A3	Salzman2013
chr19_19750894_19751380_-	hsa_circ_0000918	487	299	cd_19, Hs68_RNase, Hs68_control, Nhek, K562, Huvec, Hepg2, Helas3, H1hesc, Gm12878, Bj, Ag04450, A549, Sknshra, Mcf7	None	ANNOTATED, CDS, coding, INTERNAL, OVCODE, OVEXON	NM_016573	GMIP	Jeck2013, Memczak2013, Salzman2013
chr1_51121114_51210447_-	hsa_circ_0004619	89334	377	Hs68_RNase, Hs68_control, K562, Helas3, Gm12878	None	ANNOTATED, CDS, coding, INTERNAL, OVCODE, OVEXON	NM_007051	FAF1	Jeck2013, Salzman2013
chr8_68005778_68007967_+	hsa_circ_0084663	2190	539	K562	NA	ANNOTATED, CDS, coding, INTERNAL, OVCODE, OVEXON	NM_024790	CSPP1	Salzman2013
chr2_128922304_128928858_+	hsa_circ_0008298	6555	279	Hs68_RNase, Hs68_control, Nhek, K562, Hepg2, Helas3, H1hesc, Gm12878, Bj, Ag04450, A549, Sknshra, Mcf7	None	ANNOTATED, INTERNAL, ncRNA, OVCODE, OVEXON	NR_027671	UGGT1	Jeck2013, Salzman2013
chr7_6736970_6744854_-	hsa_circ_0007140	7885	288	Hs68_RNase, Hs68_control, K562, Hepg2, Helas3, Gm12878, Bj, Ag04450, A549, Sknshra	None	ANNOTATED, CDS, coding, INTERNAL, OVCODE, OVEXON, UTR5	NM_016265	ZNF12	Jeck2013, Salzman2013
chr12_98989211_98989439_+	hsa_circ_0005781	229	229	Hs68_RNase, Hs68_control	None	ALT_DONOR, CDS, coding, INTERNAL, intronic, OVCODE, OVEXON	NM_005888	SLC25A3	Jeck2013
chr1_8568686_8617582_-	hsa_circ_0005829	48897	357	Hs68_RNase, Hs68_control	None	ANNOTATED, CDS, coding, INTERNAL, OVCODE, OVEXON	NM_012102	RERE	Jeck2013
chr15_51743842_51747425_-	hsa_circ_0035277	3584	223	Nhek, K562, Hepg2, Helas3, Bj, A549, Sknshra	NA	ANNOTATED, CDS, coding, INTERNAL, OVCODE, OVERLAPTX, OVEXON	NM_001174116	DMXL2	Salzman2013
chr11_75718578_75728024_+	hsa_circ_0023641	9447	315	Gm12878	NA	ANNOTATED, CDS, coding, INTERNAL, OVCODE, OVEXON	NM_003369	UVRAG	Salzman2013
chr5_74639678_74641483_+	hsa_circ_0073036	1806	285	K562, Helas3, H1hesc, Gm12878, Nhek, Sknshra	NA	ANNOTATED, CDS, coding, INTERNAL, OVCODE, OVEXON	NM_000859	HMGCR	Salzman2013
chr10_102697159_102703885_+	hsa_circ_0006409	6727	321	Hs68_RNase, Hs68_control, Helas3, Gm12878	None	ANNOTATED, CDS, coding, INTERNAL, OVCODE, OVEXON	NM_018121	FAM178A	Jeck2013, Salzman2013
chr13_100953714_100962162_+	hsa_circ_0002664	8449	364	Hs68_RNase, Hs68_control, K562, Helas3, H1hesc, Gm12878, Bj, Ag04450, A549, Sknshra	None	ANNOTATED, CDS, coding, INTERNAL, OVCODE, OVEXON	NM_000282	PCCA	Jeck2013, Salzman2013
chr20_37570602_37576643_+	hsa_circ_0007051	6042	293	Hs68_RNase, Hs68_control	None	ANNOTATED, CDS, coding, INTERNAL, OVCODE, OVEXON	NM_030919	FAM83D	Jeck2013
chr17_20922397_20931987_-	hsa_circ_0042474	9591	349	A549	NA	ANNOTATED, CDS, coding, INTERNAL, OVCODE, OVEXON	NM_015276	USP22	Salzman2013
chr3_61975299_61989171_+	hsa_circ_0066406	13873	329	Helas3, H1hesc, Bj, Ag04450, A549	NA	ANNOTATED, CDS, coding, INTERNAL, OVCODE, OVEXON	NM_002841	PTPRG	Salzman2013
chr1_15860732_15874923_+	hsa_circ_0009118	14192	856	Hs68_RNase, Hs68_control, Nhek, K562	None	ANNOTATED, CDS, coding, INTERNAL, OVCODE, OVEXON	NM_015291	DNAJC16	Jeck2013, Salzman2013
chr3_155551257_155560408_-	hsa_circ_0067774	9152	491	K562, Hepg2	NA	ANNOTATED, CDS, coding, INTERNAL, OVCODE, OVEXON	NM_004733	SLC33A1	Salzman2013
chr6_17665470_17669259_-	hsa_circ_0002492	3790	201	Hs68_RNase, Hs68_control, K562, Huvec, Hepg2, Helas3, H1hesc, Gm12878, Bj, Ag04450, A549, Sknshra	None	ANNOTATED, CDS, coding, INTERNAL, OVCODE, OVEXON	NM_005124	NUP153	Jeck2013, Salzman2013
chr10_49609655_49613024_+	hsa_circ_0018315	3370	301	K562, H1hesc, Bj, A549, Sknshra	NA	ALT_ACCEPTOR, CDS, coding, OVCODE, OVEXON, upstream_start, UTR5	NM_002750	MAPK8	Salzman2013
chr1_183083666_183084772_+	hsa_circ_0004573	1107	307	Hs68_RNase, Hs68_control	None	ANNOTATED, CDS, coding, INTERNAL, OVCODE, OVEXON	NM_002293	LAMC1	Jeck2013
chr3_141087463_141105779_+	hsa_circ_0003815	18317	388	Hs68_RNase, Hs68_control	None	ANNOTATED, coding, INTERNAL, OVEXON, UTR5	NM_001080412	ZBTB38	Jeck2013
chr12_2929252_2930958_+	hsa_circ_0000374	1707	542	cd_19, Nhek, K562, Hsmm, Hepg2, Helas3, H1hesc, Gm12878, Bj, Ag04450, A549, Sknshra	None	ANNOTATED, CDS, coding, INTERNAL	NM_018463	ITFG2	Memczak2013, Salzman2013
chr12_32861087_32871697_+	hsa_circ_0025850	10611	443	Ag04450	NA	ANNOTATED, CDS, coding, INTERNAL, OVCODE, OVEXON	NM_012062	DNM1L	Salzman2013
chr13_114164553_114193822_+	hsa_circ_0031027	29270	652	Nhek, K562, Hepg2, Helas3, H1hesc, Gm12878, Bj, A549	NA	ANNOTATED, CDS, coding, INTERNAL, OVCODE, OVEXON	NM_017905	TMCO3	Salzman2013
chr15_93467551_93472321_+	hsa_circ_0007262	4771	381	Hs68_RNase, Hs68_control, Ag04450	None	ANNOTATED, CDS, coding, INTERNAL, OVCODE, OVEXON	NM_001271	CHD2	Jeck2013, Salzman2013
chr17_29483001_29497015_+	hsa_circ_0007542	14015	526	Hs68_RNase, Hs68_control, Nhek, K562, Helas3, H1hesc, Gm12878, Bj, Ag04450, A549, Sknshra	None	ANNOTATED, CDS, coding, INTERNAL, OVCODE, OVEXON	NM_001042492	NF1	Jeck2013, Salzman2013
chr4_110412483_110416012_+	hsa_circ_0001436	3530	323	HEK293, cd_19, Hs68_RNase, Hs68_control, K562, Huvec, Hepg2, Helas3, H1hesc, Gm12878, Bj, Ag04450, A549, Nhek, Nhlf, Sknshra, Mcf7	None	ANNOTATED, CDS, coding, INTERNAL, OVCODE, OVEXON	NM_006323	SEC24B	Jeck2013, Memczak2013, Salzman2013
chr12_32458631_32459056_+	hsa_circ_0025839	426	426	H1hesc, Gm12878, Ag04450	NA	ANNOTATED, CDS, coding, INTERNAL, OVCODE, OVEXON	NM_001714	BICD1	Salzman2013
chr4_140037803_140060651_-	hsa_circ_0007710	22849	9004	Hs68_RNase, Hs68_control	None	ALT_ACCEPTOR, ALT_DONOR, CDS, coding, intronic, OVCODE, OVEXON, upstream_start, UTR5	NM_201999	ELF2	Jeck2013
chr7_23385559_23391205_-	hsa_circ_0079599	5647	540	H1hesc	NA	ANNOTATED, CDS, coding, INTERNAL, OVCODE, OVEXON	NM_006547	IGF2BP3	Salzman2013
chr11_68286969_68305359_+	hsa_circ_0023224	18391	384	K562, H1hesc	NA	ANNOTATED, CDS, coding, INTERNAL, OVCODE, OVERLAPTX, OVEXON, UTR5	NM_001164160	PPP6R3	Salzman2013
chr1_231081135_231097049_-	hsa_circ_0000194	15915	308	cd_34, K562, Hepg2, Helas3, Bj, Ag04450, A549, Mcf7	None	ANNOTATED, CDS, coding, INTERNAL	NM_024525	TTC13	Memczak2013, Salzman2013
chr3_113207792_113225452_-	hsa_circ_0006163	17661	611	Hs68_RNase, Hs68_control, K562, H1hesc, Gm12878, Ag04450, A549, Sknshra	None	ANNOTATED, CDS, coding, INTERNAL, OVCODE, OVEXON	NM_144718	SPICE1	Jeck2013, Salzman2013
chr3_67546222_67559327_-	hsa_circ_0004276	13106	402	Hs68_RNase, Hs68_control, Nhek, K562, Huvec, Hsmm, Hepg2, Helas3, H1hesc, Gm12878, Bj, Ag04450, A549, Nhlf, Sknshra, Mcf7	None	ANNOTATED, CDS, coding, INTERNAL, OVCODE, OVEXON	NM_003848	SUCLG2	Jeck2013, Salzman2013
chr22_46085592_46136418_+	hsa_circ_0008199	50827	1057	Hs68_RNase, Hs68_control, K562, Helas3, Gm12878, Bj, Ag04450, A549	None	ANNOTATED, CDS, coding, INTERNAL, OVCODE, OVEXON	NM_013236	ATXN10	Jeck2013, Salzman2013
chr3_155611307_155624052_+	hsa_circ_0008929	12746	499	Hs68_RNase, Hs68_control	None	ANNOTATED, CDS, coding, INTERNAL, OVCODE, OVEXON	NM_003875	GMPS	Jeck2013
chr2_223386486_223389752_+	hsa_circ_0058429	3267	270	Gm12878, A549	NA	ANNOTATED, CDS, coding, INTERNAL, OVCODE, OVEXON	NM_152386	SGPP2	Salzman2013
chr7_550446_552092_-	hsa_circ_0079037	1647	293	A549	NA	ANNOTATED, CDS, coding, INTERNAL, OVCODE, OVEXON	NM_002607	PDGFA	Salzman2013
chr1_225600156_225603034_-	hsa_circ_0016650	2879	247	Nhek, K562, Huvec, Helas3, Gm12878, Bj, Ag04450, A549, Sknshra	NA	ANNOTATED, CDS, coding, INTERNAL, OVCODE, OVERLAPTX, OVEXON	NM_002296	LBR	Salzman2013
chr12_50385781_50386438_-	hsa_circ_0009035	658	375	Hs68_RNase, Hs68_control, Nhek, K562, Huvec, Hepg2, Helas3, H1hesc, Gm12878, Bj, Ag04450, A549, Sknshra, Mcf7	None	ANNOTATED, CDS, coding, INTERNAL, OVCODE, OVEXON	NM_001126103	RACGAP1	Jeck2013, Salzman2013
chr7_6150756_6155154_+	hsa_circ_0007823	4399	451	Hs68_RNase, Hs68_control, K562, Hepg2, Helas3, H1hesc, Gm12878, Bj, Ag04450, A549, Sknshra	None	ANNOTATED, CDS, coding, INTERNAL, OVCODE, OVEXON, UTR5	NM_032172	USP42	Jeck2013, Salzman2013
chr19_17626982_17628659_+	hsa_circ_0049998	1678	351	K562, Hmec, Hepg2, Helas3, H1hesc, Gm12878, Ag04450, A549, Sknshra	NA	ANNOTATED, CDS, coding, INTERNAL, OVCODE, OVEXON	NM_012088	PGLS	Salzman2013
chr17_28011581_28030080_-	hsa_circ_0000754	18500	291	cd_19, Hs68_RNase, Hs68_control, Nhek, K562, Huvec, Helas3, Gm12878, Ag04450, A549, Sknshra	None	ANNOTATED, CDS, coding, INTERNAL, OVCODE, OVEXON	NM_033389	SSH2	Jeck2013, Memczak2013, Salzman2013
chr20_37125996_37137851_+	hsa_circ_0060338	11856	483	Gm12878	NA	ANNOTATED, CDS, coding, INTERNAL, OVCODE, OVEXON	NM_020336	RALGAPB	Salzman2013
chr5_14293121_14304701_+	hsa_circ_0003474	11581	447	Hs68_RNase, Hs68_control, Helas3, H1hesc, Gm12878, Ag04450, Nhek	None	ANNOTATED, CDS, coding, INTERNAL, OVCODE, OVEXON	NM_007118	TRIO	Jeck2013, Salzman2013
chr13_96636058_96651561_-	hsa_circ_0030632	15504	432	K562	NA	ANNOTATED, CDS, coding, INTERNAL, OVCODE, OVEXON	NM_020121	UGGT2	Salzman2013
chr7_716866_751164_-	hsa_circ_0008039	34299	462	Hs68_RNase, Hs68_control, Nhek, K562, Huvec, Hsmm, Hmec, Hepg2, Helas3, H1hesc, Gm12878, Bj, Ag04450, A549, Sknshra, Mcf7	None	ANNOTATED, CDS, coding, INTERNAL, OVCODE, OVEXON, UTR5	NM_001164761	PRKAR1B	Jeck2013, Salzman2013
chr1_9931245_9938047_-	hsa_circ_0009674	6803	296	Nhek, K562, Huvec, Hsmm, Hepg2, Helas3, H1hesc, Gm12878, Bj, Ag04450, A549, Sknshra, Mcf7	NA	ANNOTATED, CDS, coding, INTERNAL, OVCODE, OVEXON, UTR5	NM_020248	CTNNBIP1	Salzman2013
chr2_120885264_120932580_+	hsa_circ_0008278	47317	962	Hs68_RNase, Hs68_control	None	ALT_DONOR, CDS, coding, INTERNAL, OVCODE, OVEXON, UTR3	NM_020909	EPB41L5	Jeck2013
chr1_197621365_197684204_-	hsa_circ_0015798	62840	365	Gm12878, A549	NA	ANNOTATED, CDS, coding, INTERNAL, OVCODE, OVERLAPTX, OVEXON	NM_001195215	DENND1B	Salzman2013
chr5_151176788_151178874_+	hsa_circ_0006694	2087	304	Hs68_RNase, Hs68_control, K562, Hepg2, Helas3, Gm12878, Bj, Ag04450, A549, Sknshra, Mcf7	None	ANNOTATED, CDS, coding, INTERNAL, OVCODE, OVEXON	NM_005754	G3BP1	Jeck2013, Salzman2013
chr7_158566032_158591763_-	hsa_circ_0083220	25732	473	Nhek, K562, Hsmm, Gm12878, A549	NA	ANNOTATED, CDS, coding, INTERNAL, OVCODE, OVEXON	NM_020728	ESYT2	Salzman2013
chrX_135095117_135098917_+	hsa_circ_0008579	3801	300	Hs68_RNase, Hs68_control	None	ALT_ACCEPTOR, CDS, coding, INTERNAL, OVCODE, OVEXON	NM_001042537	SLC9A6	Jeck2013
chr6_105192035_105198347_-	hsa_circ_0006993	6313	302	Hs68_RNase, Hs68_control, Hepg2, Gm12878, Ag04450, A549, Nhek	None	ANNOTATED, CDS, coding, INTERNAL, OVCODE, OVEXON	NM_020771	HACE1	Jeck2013, Salzman2013
chr9_22046750_22056386_+	hsa_circ_0008574	9637	409	Hs68_RNase, Hs68_control, Bj, Mcf7	LINE	ANNOTATED, INTERNAL, ncRNA, OVEXON	NR_003529	CDKN2B-AS	Jeck2013, Salzman2013
chr3_57827026_57843886_+	hsa_circ_0001975	16861	341	Hs68_RNase, Hs68_control, Nhek	None	ANNOTATED, CDS, coding, INTERNAL, OVCODE, OVEXON	NM_007159	SLMAP	Jeck2013, Salzman2013
chr1_8555123_8601377_-	hsa_circ_0009581	46255	379	Nhek, K562, Helas3, H1hesc, Gm12878, Bj, Ag04450, A549, Sknshra	NA	ANNOTATED, CDS, coding, INTERNAL, OVCODE, OVERLAPTX, OVEXON	NM_012102	RERE	Salzman2013
chr15_85607601_85620018_+	hsa_circ_0036612	12418	360	A549	NA	ANNOTATED, CDS, coding, INTERNAL, OVCODE, OVEXON	NM_002605	PDE8A	Salzman2013
chr2_203947942_203949292_+	hsa_circ_0006734	1351	414	Hs68_RNase, Hs68_control	None	ANNOTATED, CDS, coding, INTERNAL, OVCODE, OVEXON	NM_001114132	NBEAL1	Jeck2013
chr1_247320302_247323115_-	hsa_circ_0005667	2814	406	Hs68_RNase, Hs68_control	None	ALT_DONOR, CDS, coding, INTERNAL, OVCODE, OVEXON	NM_003431	ZNF124	Jeck2013
chr5_37331787_37341344_-	hsa_circ_0072264	9558	536	K562, Helas3, H1hesc	NA	ANNOTATED, CDS, coding, INTERNAL, OVCODE, OVEXON	NM_153485	NUP155	Salzman2013
chr7_106921745_106924177_-	hsa_circ_0081891	2433	262	Nhek	NA	ANNOTATED, CDS, coding, INTERNAL, OVCODE, OVEXON	NM_001161520	COG5	Salzman2013
chr3_133341935_133343019_-	hsa_circ_0008069	1085	374	Hs68_RNase, Hs68_control, Nhek, K562, Huvec, Helas3	None	ANNOTATED, CDS, coding, INTERNAL, OVCODE, OVEXON	NM_007027	TOPBP1	Jeck2013, Salzman2013
chr9_125047448_125054119_+	hsa_circ_0004793	6672	211	Hs68_RNase, Hs68_control, Helas3	None	ANNOTATED, CDS, coding, INTERNAL, OVCODE, OVEXON	NM_138777	MRRF	Jeck2013, Salzman2013
chr18_33775220_33783152_+	hsa_circ_0003552	7933	876	Hs68_RNase, Hs68_control	None	ANNOTATED, CDS, coding, INTERNAL, OVCODE, OVEXON	NM_017947	MOCOS	Jeck2013
chr19_45783632_45783992_+	hsa_circ_0006698	361	270	Hs68_RNase, Hs68_control, Nhek, Huvec, Helas3, H1hesc, Gm12878, Bj, Ag04450, Sknshra	None	ANNOTATED, CDS, coding, INTERNAL, OVCODE, OVEXON	NM_031417	MARK4	Jeck2013, Salzman2013
chr9_37126309_37126939_+	hsa_circ_0001860	631	631	cd_19, cd_34, neutr, Hs68_RNase, Hs68_control, K562, Helas3, Gm12878, Bj, Ag04450, A549, Nhlf, Sknshra	None	ANNOTATED, CDS, coding, INTERNAL, OVCODE, OVEXON, UTR5	NM_032226	ZCCHC7	Jeck2013, Memczak2013, Salzman2013
chr3_122487548_122496753_-	hsa_circ_0008009	9206	368	Hs68_RNase, Hs68_control	None	ANNOTATED, CDS, coding, INTERNAL, OVCODE, OVEXON	NM_024610	HSPBAP1	Jeck2013
chr6_80910651_80912929_+	hsa_circ_0077168	2279	209	K562, H1hesc, Bj, Ag04450	NA	ANNOTATED, CDS, coding, INTERNAL, OVCODE, OVEXON	NM_183050	BCKDHB	Salzman2013
chr15_44671888_44673174_+	hsa_circ_0003829	1287	270	Hs68_RNase, Hs68_control, H1hesc	None	ANNOTATED, CDS, coding, INTERNAL, OVCODE, OVEXON	NM_138423	CASC4	Jeck2013, Salzman2013
chr17_28011581_28022541_-	hsa_circ_0042823	10961	187	Nhek, Huvec, Helas3, H1hesc, Gm12878, Bj, Ag04450, A549, Sknshra	NA	ANNOTATED, CDS, coding, INTERNAL, OVCODE, OVERLAPTX, OVEXON	NM_033389	SSH2	Salzman2013
chr7_1997264_2041756_-	hsa_circ_0079140	44493	237	Ag04450, Mcf7	NA	ANNOTATED, CDS, coding, INTERNAL, OVCODE, OVERLAPTX, OVEXON	NM_003550	MAD1L1	Salzman2013
chr8_56879274_56882352_+	hsa_circ_0084552	3079	260	K562, Helas3, Gm12878, Ag04450, A549, Sknshra	NA	ANNOTATED, CDS, coding, INTERNAL, OVCODE, OVEXON	NM_002350	LYN	Salzman2013
chr8_141856698_141900868_-	hsa_circ_0006299	44171	562	Hs68_RNase, Hs68_control, Huvec, Ag04450	None	ANNOTATED, CDS, coding, INTERNAL, OVCODE, OVEXON, UTR5	NM_001199649	PTK2	Jeck2013, Salzman2013
chr2_120684174_120692534_+	hsa_circ_0056247	8361	354	Nhek, K562, Huvec, Helas3, H1hesc, Gm12878, A549, Mcf7	NA	ANNOTATED, CDS, coding, INTERNAL, OVCODE, OVEXON	NM_002830	PTPN4	Salzman2013
chr9_34286615_34290387_-	hsa_circ_0007356	3773	304	Hs68_RNase, Hs68_control, K562, H1hesc	None	ANNOTATED, CDS, coding, INTERNAL, OVCODE, OVEXON	NM_194313	KIF24	Jeck2013, Salzman2013
chr3_28293203_28304871_+	hsa_circ_0008669	11669	11669	Hs68_RNase, Hs68_control	None	ALT_ACCEPTOR, CDS, coding, INTERNAL, intronic, OVCODE, OVEXON	NM_182523	CMC1	Jeck2013
chr16_23113640_23119504_-	hsa_circ_0008498	5865	601	Hs68_RNase, Hs68_control	None	ANNOTATED, CDS, coding, INTERNAL, OVCODE, OVEXON	NM_020718	USP31	Jeck2013
chr6_42643794_42647570_+	hsa_circ_0076405	3777	467	Bj, Ag04450	NA	ANNOTATED, CDS, coding, INTERNAL, OVCODE, OVEXON	NM_015255	UBR2	Salzman2013
chr12_133331261_133331719_-	hsa_circ_0029554	459	459	Nhek, K562, A549	NA	ANNOTATED, CDS, coding, INTERNAL, OVCODE, OVEXON	NM_015114	ANKLE2	Salzman2013
chr3_185316200_185318643_+	hsa_circ_0068402	2444	292	H1hesc	NA	ANNOTATED, CDS, coding, INTERNAL, OVCODE, OVEXON	NM_021627	SENP2	Salzman2013
chr7_94248070_94259153_-	hsa_circ_0081171	11084	553	Hepg2, Gm12878, Ag04450, A549, Sknshra	NA	ANNOTATED, CDS, coding, INTERNAL, OVCODE, OVEXON	NM_001099401	SGCE	Salzman2013
chr8_142195238_142200516_+	hsa_circ_0007116	5279	435	Hs68_RNase, Hs68_control, Huvec, Hepg2, Helas3, Bj, Ag04450, A549, Nhlf	None	ANNOTATED, CDS, coding, INTERNAL, OVCODE, OVEXON	NM_014957	DENND3	Jeck2013, Salzman2013
chr18_9931807_9937063_+	hsa_circ_0006990	5257	338	Hs68_RNase, Hs68_control, Nhek, K562, Hepg2, Helas3, H1hesc, Gm12878, Bj, Ag04450, A549, Sknshra	None	ANNOTATED, CDS, coding, INTERNAL, OVCODE, OVEXON	NM_003574	VAPA	Jeck2013, Salzman2013
chr16_70346512_70350007_+	hsa_circ_0040205	3496	239	Gm12878	NA	ANNOTATED, CDS, coding, INTERNAL, OVCODE, OVERLAPTX, OVEXON	NM_007242	DDX19B	Salzman2013
chrX_122799493_122820564_-	hsa_circ_0007449	21072	785	Hs68_RNase, Hs68_control, K562, A549, Nhek, Sknshra	None	ANNOTATED, CDS, coding, INTERNAL, OVCODE, OVEXON	NM_001081550	THOC2	Jeck2013, Salzman2013
chr19_21216262_21216990_+	hsa_circ_0008838	729	226	Hs68_RNase, Hs68_control, K562, Gm12878, Bj, Sknshra, Mcf7	None	ANNOTATED, CDS, coding, INTERNAL, OVCODE, OVEXON	NM_025189	ZNF430	Jeck2013, Salzman2013
chr12_64803742_64810534_+	hsa_circ_0003348	6793	274	Hs68_RNase, Hs68_control, K562	None	ANNOTATED, CDS, coding, INTERNAL, OVCODE, OVEXON, UTR5	NM_007235	XPOT	Jeck2013, Salzman2013
chr11_85722073_85726006_-	hsa_circ_0023938	3934	313	K562	NA	ANNOTATED, CDS, coding, INTERNAL, OVCODE, OVERLAPTX, OVEXON	NM_007166	PICALM	Salzman2013
chr12_95451329_95451654_-	hsa_circ_0008405	326	239	Hs68_RNase, Hs68_control, Gm12878, A549	None	ANNOTATED, CDS, coding, INTERNAL, OVCODE, OVEXON	NM_003297	NR2C1	Jeck2013, Salzman2013
chr2_148730308_148733544_-	hsa_circ_0001074	3237	242	cd_34, Hs68_RNase, Hs68_control, Nhek, K562, Huvec, Hepg2, Helas3, H1hesc, Gm12878, Bj, Ag04450, A549, Nhlf, Sknshra	None	ANNOTATED, CDS, coding, INTERNAL, OVCODE, OVEXON, UTR5	NM_002552	ORC4	Jeck2013, Memczak2013, Salzman2013
chr15_44053622_44055404_+	hsa_circ_0003598	1783	238	Hs68_RNase, Hs68_control, K562, Huvec, Hepg2, Helas3, H1hesc, Gm12878, Bj, Ag04450, A549, Sknshra	None	ANNOTATED, CDS, coding, INTERNAL, OVCODE, OVEXON	NM_005313	PDIA3	Jeck2013, Salzman2013
chr15_43102812_43109295_-	hsa_circ_0005417	6484	285	Hs68_RNase, Hs68_control, K562, Hepg2, Helas3, Gm12878, Bj, Ag04450, A549	None	ANNOTATED, CDS, coding, INTERNAL, OVCODE, OVEXON	NM_173500	TTBK2	Jeck2013, Salzman2013
chr2_75745182_75753325_-	hsa_circ_0002651	8144	3988	Hs68_RNase, Hs68_control	None	ALT_ACCEPTOR, CDS, coding, INTERNAL, intronic, OVCODE, OVEXON, UTR5	NM_001135032	FAM176A	Jeck2013
chr6_144808684_144814592_+	hsa_circ_0004826	5909	771	Hs68_RNase, Hs68_control	None	ANNOTATED, CDS, coding, INTERNAL, OVCODE, OVEXON	NM_007124	UTRN	Jeck2013
chr1_109439486_109446876_+	hsa_circ_0013390	7391	1136	K562, Gm12878, Ag04450	NA	ANNOTATED, CDS, coding, INTERNAL, OVCODE, OVERLAPTX, OVEXON	NM_013296	GPSM2	Salzman2013
chr15_57383987_57387361_+	hsa_circ_0004889	3375	3375	Hs68_RNase, Hs68_control	None	ALT_DONOR, CDS, coding, INTERNAL, intronic, OVCODE, OVEXON	NM_207037	TCF12	Jeck2013
chr12_110922883_110925748_+	hsa_circ_0004516	2866	519	Hs68_RNase, Hs68_control	None	ANNOTATED, CDS, coding, INTERNAL, OVCODE, OVEXON	NM_013300	C12orf24	Jeck2013
chr20_50224066_50230371_-	hsa_circ_0060872	6306	388	A549	NA	ANNOTATED, CDS, coding, INTERNAL, OVCODE, OVEXON	NM_006045	ATP9A	Salzman2013
chr7_16722405_16729531_+	hsa_circ_0079493	7127	312	K562, Huvec, Helas3, Ag04450	NA	ANNOTATED, CDS, coding, INTERNAL, OVCODE, OVEXON	NM_001159767	BZW2	Salzman2013
chr17_526773_530556_-	hsa_circ_0007736	3784	285	Hs68_RNase, Hs68_control, K562, Hepg2, H1hesc, Gm12878, Ag04450, A549, Sknshra	None	ANNOTATED, CDS, coding, INTERNAL, OVCODE, OVEXON	NM_001128159	VPS53	Jeck2013, Salzman2013
chr5_138221901_138223331_+	hsa_circ_0074166	1431	234	Sknshra	NA	ANNOTATED, CDS, coding, INTERNAL, OVCODE, OVEXON	NM_001903	CTNNA1	Salzman2013
chr6_110988637_111067404_-	hsa_circ_0002160	78768	328	Hs68_RNase, Hs68_control, K562, Hepg2, Helas3, H1hesc, Ag04450, Sknshra	None	ANNOTATED, CDS, coding, INTERNAL, OVCODE, OVEXON	NM_015076	CDK19	Jeck2013, Salzman2013
chr21_45153950_45163688_+	hsa_circ_0061891	9739	244	K562, Hepg2, Helas3, H1hesc, A549, Mcf7	NA	ANNOTATED, CDS, coding, INTERNAL, OVCODE, OVERLAPTX, OVEXON	NM_003681	PDXK	Salzman2013
chr17_4186093_4200104_-	hsa_circ_0008956	14012	396	Hs68_RNase, Hs68_control	None	ALT_ACCEPTOR, CDS, coding, INTERNAL, OVCODE, OVEXON, UTR3	NM_003342	UBE2G1	Jeck2013
chr6_45459678_45480144_+	hsa_circ_0076691	20467	336	Hepg2, Bj, Ag04450	NA	ANNOTATED, CDS, coding, INTERNAL, OVCODE, OVEXON	NM_004348	RUNX2	Salzman2013
chr17_54921380_54925426_+	hsa_circ_0044709	4047	424	K562, H1hesc, Gm12878, Bj, Ag04450	NA	ANNOTATED, CDS, coding, INTERNAL, OVCODE, OVEXON	NM_003647	DGKE	Salzman2013
chr11_47504247_47510576_-	hsa_circ_0000304	6330	697	neutr, K562, Hepg2, Helas3, Gm12878, Ag04450, A549, Nhek	None	ANNOTATED, CDS, coding, INTERNAL, UTR5	NM_198700	CELF1	Memczak2013, Salzman2013
chr19_11507920_11508273_-	hsa_circ_0049457	354	268	Helas3, Sknshra	NA	ANNOTATED, CDS, coding, INTERNAL, OVCODE, OVEXON	NM_001161616	RGL3	Salzman2013
chr4_153332455_153333681_-	hsa_circ_0001451	1227	1227	cd_19, Hs68_RNase, Hs68_control, K562, Huvec, Hmec, Hepg2, Helas3, H1hesc, Gm12878, Bj, Ag04450, A549, Nhek, Sknshra	LINE	ALT_ACCEPTOR, CDS, coding, INTERNAL, intronic, OVCODE, OVEXON, UTR5	NM_033632	FBXW7	Jeck2013, Memczak2013, Salzman2013
chr9_100109596_100112837_+	hsa_circ_0087659	3242	504	Gm12878, Ag04450	NA	ANNOTATED, INTERNAL, ncRNA, OVCODE, OVEXON	NR_036528	BDAG1	Salzman2013
chr4_17816476_17816981_+	hsa_circ_0001395	506	231	cd_19, Hs68_RNase, Hs68_control	None	ANNOTATED, CDS, coding, INTERNAL, OVCODE, OVEXON	NM_022346	NCAPG	Jeck2013, Memczak2013
chr1_51871577_51874004_-	hsa_circ_0004877	2428	402	Hs68_RNase, Hs68_control, K562, Hepg2, H1hesc, Gm12878, Ag04450, A549, Sknshra	None	ANNOTATED, CDS, coding, INTERNAL, OVCODE, OVEXON	NM_001981	EPS15	Jeck2013, Salzman2013
chr11_62638217_62639141_+	hsa_circ_0022575	925	186	K562, Hepg2, Helas3, H1hesc, Gm12878	SINE	ANNOTATED, CDS, coding, INTERNAL, OVCODE, OVEXON	NM_002394	SLC3A2	Salzman2013
chr4_77976303_77987558_-	hsa_circ_0003373	11256	733	Hs68_RNase, Hs68_control	None	ANNOTATED, CDS, coding, INTERNAL, OVCODE, OVEXON, UTR5	NM_006835	CCNI	Jeck2013
chr2_29129326_29140861_+	hsa_circ_0053339	11536	486	Nhek, K562, Bj, A549	NA	ANNOTATED, CDS, coding, INTERNAL, OVCODE, OVEXON	NM_015131	WDR43	Salzman2013
chr17_40764093_40765091_+	hsa_circ_0006710	999	276	Hs68_RNase, Hs68_control	None	ANNOTATED, CDS, coding, INTERNAL, OVCODE, OVEXON	NM_001070	TUBG1	Jeck2013
chr2_176835492_176860374_-	hsa_circ_0005775	24883	419	Hs68_RNase, Hs68_control, H1hesc	None	ANNOTATED, CDS, coding, INTERNAL, OVCODE, OVEXON, UTR5	NM_030650	KIAA1715	Jeck2013, Salzman2013
chr5_118264232_118280344_-	hsa_circ_0004509	16113	379	Hs68_RNase, Hs68_control	None	ANNOTATED, CDS, coding, INTERNAL, OVCODE, OVEXON	NM_173666	DTWD2	Jeck2013
chr11_14839729_14840755_+	hsa_circ_0021342	1027	285	Hepg2	NA	ANNOTATED, CDS, coding, INTERNAL, OVCODE, OVEXON	NM_000922	PDE3B	Salzman2013
chr10_518379_532470_-	hsa_circ_0008655	14092	183	Hs68_RNase, Hs68_control	None	ANNOTATED, CDS, coding, INTERNAL, OVCODE, OVEXON	NM_014974	DIP2C	Jeck2013
chr7_56049903_56052571_+	hsa_circ_0080250	2669	244	Nhek, K562, Hepg2, Helas3, H1hesc, Gm12878, Ag04450, A549, Sknshra	NA	ANNOTATED, CDS, coding, INTERNAL, OVCODE, OVEXON	NM_001483	GBAS	Salzman2013
chr14_73459851_73460065_-	hsa_circ_0032491	215	215	Nhek, Huvec, Hsmm, Bj, Ag04450, A549, Nhlf, Mcf7	NA	ANNOTATED, CDS, coding, INTERNAL, OVCODE, OVEXON	NM_021260	ZFYVE1	Salzman2013
chr3_196118684_196129890_-	hsa_circ_0001380	11207	247	HEK293, cd_19, neutr, Hs68_RNase, Hs68_control, Nhek, K562, Huvec, Hepg2, Helas3, H1hesc, Gm12878, Bj, Ag04450, A549, Sknshra, Mcf7	None	ANNOTATED, CDS, coding, INTERNAL, OVCODE, OVEXON	NM_015562	UBXN7	Jeck2013, Memczak2013, Salzman2013
chr10_72285679_72291210_+	hsa_circ_0018659	5532	662	A549, Mcf7	NA	ANNOTATED, CDS, coding, INTERNAL, OVCODE, OVEXON, UTR5	NM_014431	KIAA1274	Salzman2013
chr22_47370186_47393605_+	hsa_circ_0001252	23420	186	cd_34, Hs68_RNase, Hs68_control, Nhek, K562, Huvec, Hepg2, Helas3, H1hesc, Gm12878, Bj, Ag04450, A549	None	ANNOTATED, CDS, coding, INTERNAL, OVCODE, OVEXON	NM_014346	TBC1D22A	Jeck2013, Memczak2013, Salzman2013
chr10_75156277_75160615_-	hsa_circ_0006276	4339	436	Hs68_RNase, Hs68_control, Nhek, K562, Hsmm, Hepg2, Helas3, H1hesc, Gm12878, Bj, Ag04450, A549, Nhlf, Sknshra, Mcf7	None	ANNOTATED, CDS, coding, INTERNAL, OVCODE, OVEXON, UTR5	NM_004034	ANXA7	Jeck2013, Salzman2013
chr15_72180345_72186119_-	hsa_circ_0036158	5775	213	Ag04450, A549	NA	ANNOTATED, CDS, coding, INTERNAL, OVCODE, OVEXON	NM_006901	MYO9A	Salzman2013
chr8_30557598_30569605_-	hsa_circ_0083863	12008	389	Hepg2, A549, Mcf7	NA	ANNOTATED, CDS, coding, INTERNAL, OVCODE, OVEXON	NM_000637	GSR	Salzman2013
chr17_20919065_20924539_-	hsa_circ_0002022	5475	534	Hs68_RNase, Hs68_control	None	ANNOTATED, CDS, coding, INTERNAL, OVCODE, OVEXON	NM_015276	USP22	Jeck2013
chr15_76914105_76958130_-	hsa_circ_0005143	44026	203	Hs68_RNase, Hs68_control	None	ANNOTATED, CDS, coding, INTERNAL, OVCODE, OVEXON	NM_001145923	SCAPER	Jeck2013
chr11_102233627_102239279_+	hsa_circ_0004103	5653	371	Hs68_RNase, Hs68_control, K562, Ag04450	None	ANNOTATED, CDS, coding, INTERNAL, OVCODE, OVEXON	NM_001166	BIRC2	Jeck2013, Salzman2013
chr22_24133943_24135875_+	hsa_circ_0004208	1933	269	Hs68_RNase, Hs68_control, H1hesc, Ag04450	None	ANNOTATED, CDS, coding, INTERNAL, OVCODE, OVEXON	NM_003073	SMARCB1	Jeck2013, Salzman2013
chr7_943763_959687_-	hsa_circ_0079089	15925	343	Gm12878	NA	ANNOTATED, CDS, coding, INTERNAL, OVCODE, OVEXON	NM_006869	ADAP1	Salzman2013
chr2_230633332_230636348_-	hsa_circ_0058539	3017	313	Nhek, K562, H1hesc, Gm12878, Mcf7	NA	ANNOTATED, CDS, coding, INTERNAL, OVCODE, OVEXON	NM_004238	TRIP12	Salzman2013
chr4_79186179_79188586_+	hsa_circ_0070113	2408	378	Hepg2, Helas3, H1hesc, Gm12878, A549	NA	ANNOTATED, CDS, coding, INTERNAL, OVCODE, OVEXON	NM_025074	FRAS1	Salzman2013
chr4_88116476_88116842_-	hsa_circ_0002538	367	367	Hs68_RNase, Hs68_control, K562, Helas3, H1hesc, Gm12878, Ag04450, A549, Nhek, Sknshra	None	ANNOTATED, CDS, coding, INTERNAL, OVCODE, OVEXON, UTR5	NM_020803	KLHL8	Jeck2013, Salzman2013
chr2_55209651_55214834_-	hsa_circ_0001006	5184	347	HEK293, cd_19, Hs68_RNase, Hs68_control, Nhek, K562, Huvec, Hsmm, Hmec, Hepg2, Helas3, H1hesc, Gm12878, Bj, Ag04450, A549, Sknshra, Mcf7	None	ANNOTATED, CDS, coding, INTERNAL, OVCODE, OVEXON	NM_020532	RTN4	Jeck2013, Memczak2013, Salzman2013
chr6_149997396_150001593_-	hsa_circ_0078224	4198	873	K562, Huvec, Helas3, Gm12878, Ag04450, A549, Nhek	NA	ANNOTATED, CDS, coding, INTERNAL, OVCODE, OVERLAPTX, OVEXON	NM_004690	LATS1	Salzman2013
chr13_30104675_30127997_-	hsa_circ_0008598	23323	818	Hs68_RNase, Hs68_control	None	ANNOTATED, CDS, coding, INTERNAL, OVCODE, OVEXON, UTR5	NM_003045	SLC7A1	Jeck2013
chr12_48482584_48491907_-	hsa_circ_0026028	9324	376	K562, Hepg2, H1hesc, A549	NA	ANNOTATED, CDS, coding, INTERNAL, OVCODE, OVEXON	NM_014554	SENP1	Salzman2013
chr3_52446827_52448603_+	hsa_circ_0004912	1777	255	Hs68_RNase, Hs68_control, K562, Helas3, H1hesc, Bj, Ag04450, Sknshra	None	ANNOTATED, CDS, coding, INTERNAL, OVCODE, OVEXON, UTR5	NM_016483	PHF7	Jeck2013, Salzman2013
chr17_58711214_58725443_+	hsa_circ_0004958	14230	316	Hs68_RNase, Hs68_control, K562, Gm12878, Ag04450, A549, Sknshra	None	ANNOTATED, CDS, coding, INTERNAL, OVCODE, OVEXON	NM_003620	PPM1D	Jeck2013, Salzman2013
chr10_102697159_102710510_+	hsa_circ_0002045	13352	894	Hs68_RNase, Hs68_control, K562	None	ANNOTATED, CDS, coding, INTERNAL, OVCODE, OVEXON	NM_018121	FAM178A	Jeck2013, Salzman2013
chr18_196637_199316_+	hsa_circ_0007706	2680	413	Hs68_RNase, Hs68_control, K562, Hepg2, Helas3, H1hesc, Gm12878, Ag04450, A549	None	ANNOTATED, CDS, coding, INTERNAL, OVCODE, OVEXON	NM_005151	USP14	Jeck2013, Salzman2013
chr14_89041037_89044484_+	hsa_circ_0003164	3448	418	Hs68_RNase, Hs68_control, H1hesc, Ag04450	None	ANNOTATED, CDS, coding, INTERNAL, OVCODE, OVEXON	NM_024824	ZC3H14	Jeck2013, Salzman2013
chr14_20863609_20864889_-	hsa_circ_0031114	1281	379	Hepg2, Bj	NA	ANNOTATED, CDS, coding, INTERNAL, OVCODE, OVEXON	NM_007110	TEP1	Salzman2013
chr17_17927938_17931973_-	hsa_circ_0042270	4036	370	K562, Helas3	NA	ANNOTATED, CDS, coding, INTERNAL, OVCODE, OVEXON	NM_145691	ATPAF2	Salzman2013
chr19_47919909_47920607_-	hsa_circ_0003449	699	384	Hs68_RNase, Hs68_control, K562, Hepg2, Helas3, H1hesc, Bj, Ag04450, A549, Nhek, Nhlf, Sknshra, Mcf7	None	ANNOTATED, CDS, coding, INTERNAL, OVCODE, OVEXON	NM_020160	MEIS3	Jeck2013, Salzman2013
chr5_72374007_72378652_+	hsa_circ_0072979	4646	398	K562, Huvec, Ag04450	NA	ANNOTATED, CDS, coding, INTERNAL, OVCODE, OVERLAPTX, OVEXON	NM_138782	FCHO2	Salzman2013
chr2_170871791_170897495_+	hsa_circ_0056999	25705	293	K562, Nhlf	NA	ANNOTATED, CDS, coding, INTERNAL, OVCODE, OVERLAPTX, OVEXON	NM_172070	UBR3	Salzman2013
chr5_6623327_6625782_-	hsa_circ_0007380	2456	178	Hs68_RNase, Hs68_control, K562, Hepg2, Helas3, H1hesc, Gm12878, Bj, Ag04450, A549, Nhek, Sknshra	None	ANNOTATED, CDS, coding, INTERNAL, OVCODE, OVEXON	NM_017755	NSUN2	Jeck2013, Salzman2013
chr7_24659671_24681487_+	hsa_circ_0079616	21817	441	Gm12878	NA	ANNOTATED, CDS, coding, INTERNAL, OVCODE, OVERLAPTX, OVEXON, UTR5	NM_016447	MPP6	Salzman2013
chr9_126519982_126531842_-	hsa_circ_0088474	11861	170	K562, Huvec, Hsmm, Hepg2, Helas3, H1hesc, Gm12878, Bj, Ag04450, A549, Nhek, Sknshra, Mcf7	NA	ANNOTATED, CDS, coding, INTERNAL, OVCODE, OVEXON	NM_020946	DENND1A	Salzman2013
chr1_12460238_12476880_+	hsa_circ_0004222	16643	699	Hs68_RNase, Hs68_control, Nhek, K562, Bj, A549, Sknshra	None	ANNOTATED, CDS, coding, INTERNAL, OVCODE, OVEXON	NM_015378	VPS13D	Jeck2013, Salzman2013
chr7_5680785_5681007_-	hsa_circ_0006574	223	223	Hs68_RNase, Hs68_control, Nhek, K562, Hepg2, Helas3, H1hesc, Gm12878, Bj, Ag04450, A549, Nhlf, Sknshra	None	ANNOTATED, CDS, coding, INTERNAL, OVCODE, OVEXON	NM_207111	RNF216	Jeck2013, Salzman2013
chr15_64404772_64411053_+	hsa_circ_0003867	6282	307	Hs68_RNase, Hs68_control	None	ANNOTATED, CDS, coding, INTERNAL, OVCODE, OVEXON	NM_003099	SNX1	Jeck2013
chr19_10246412_10246963_-	hsa_circ_0049192	552	284	Helas3, H1hesc, Gm12878, Nhek, Nhlf, Mcf7	NA	ANNOTATED, CDS, coding, INTERNAL, OVCODE, OVEXON	NM_001130823	DNMT1	Salzman2013
chr17_57814814_57895134_+	hsa_circ_0004746	80321	762	Hs68_RNase, Hs68_control, Bj, A549	None	ANNOTATED, CDS, coding, INTERNAL, OVCODE, OVEXON	NM_030938	VMP1	Jeck2013, Salzman2013
chr1_27056142_27059283_+	hsa_circ_0008494	3142	783	Hs68_RNase, Hs68_control, Nhek, K562, Huvec, Hsmm, Helas3, H1hesc, Gm12878, Bj, Ag04450, A549, Nhlf, Sknshra	None	ANNOTATED, CDS, coding, INTERNAL, OVCODE, OVEXON	NM_006015	ARID1A	Jeck2013, Salzman2013
chr11_68334482_68343511_+	hsa_circ_0002038	9030	570	Hs68_RNase, Hs68_control, K562, Huvec, Gm12878, Bj	None	ANNOTATED, CDS, coding, INTERNAL, OVCODE, OVEXON	NM_001164160	PPP6R3	Jeck2013, Salzman2013
chr22_28269726_28293880_-	hsa_circ_0002180	24155	337	Hs68_RNase, Hs68_control, Helas3, Bj, Ag04450, Sknshra	None	ANNOTATED, CDS, coding, INTERNAL, OVCODE, OVEXON	NM_012399	PITPNB	Jeck2013, Salzman2013
chr2_15743316_15747437_+	hsa_circ_0052802	4122	565	K562, Helas3, Ag04450	NA	ANNOTATED, CDS, coding, INTERNAL, OVCODE, OVEXON	NM_004939	DDX1	Salzman2013
chr6_2779497_2783795_+	hsa_circ_0075456	4299	386	Huvec, Hepg2, Helas3, H1hesc, Gm12878, Bj, Ag04450, A549, Nhek, Sknshra, Mcf7	NA	ANNOTATED, CDS, coding, INTERNAL, OVCODE, OVEXON	NM_020135	WRNIP1	Salzman2013
chrX_107083900_107097934_+	hsa_circ_0002153	14035	812	Hs68_RNase, Hs68_control, Huvec, Helas3, Bj, Ag04450, A549, Nhek, Mcf7	None	ANNOTATED, CDS, coding, INTERNAL, OVCODE, OVEXON	NM_012216	MID2	Jeck2013, Salzman2013
chr5_137342679_137356886_-	hsa_circ_0007235	14208	1050	Hs68_RNase, Hs68_control, K562, Ag04450	None	ANNOTATED, CDS, coding, INTERNAL, OVCODE, OVEXON, UTR5	NM_016603	FAM13B	Jeck2013, Salzman2013
chr5_58481015_58511794_-	hsa_circ_0072570	30780	303	A549	NA	ANNOTATED, CDS, coding, INTERNAL, OVCODE, OVEXON	NM_001197220	PDE4D	Salzman2013
chr14_74358730_74376133_+	hsa_circ_0003448	17404	1203	Hs68_RNase, Hs68_control, Nhek, K562, Huvec, Hsmm, Hmec, Hepg2, Helas3, H1hesc, Gm12878, Bj, Ag04450, A549, Sknshra, Mcf7	None	ANNOTATED, CDS, coding, INTERNAL, OVCODE, OVEXON, UTR5	NM_001242924	ZNF410	Jeck2013, Salzman2013
chr20_30345210_30347982_+	hsa_circ_0059712	2773	299	K562	NA	ANNOTATED, CDS, coding, INTERNAL, OVCODE, OVEXON, UTR5	NM_012112	TPX2	Salzman2013
chr1_182811680_182812569_+	hsa_circ_0015548	890	274	Gm12878	NA	ANNOTATED, INTERNAL, ncRNA, OVCODE, OVEXON	NR_033302	DHX9	Salzman2013
chr21_16340618_16415895_-	hsa_circ_0001177	75278	433	cd_34	None	ALT_DONOR, coding, INTERNAL, UTR5	NM_003489	NRIP1	Memczak2013
chr8_128902835_128903244_+	hsa_circ_0001821	410	410	HEK293, Hs68_RNase, Hs68_control, Nhek, K562, Huvec, Hsmm, Hmec, Hepg2, Helas3, H1hesc, Gm12878, Bj, Ag04450, A549, Nhlf, Sknshra, Mcf7	None	ANNOTATED, INTERNAL, ncRNA, OVEXON	TCONS_00015354	TCONS_00015354	Jeck2013, Memczak2013, Salzman2013
chr19_10883155_10897382_+	hsa_circ_0049329	14228	757	Gm12878, Ag04450	NA	ANNOTATED, CDS, coding, INTERNAL, OVCODE, OVERLAPTX, OVEXON	NM_001005360	DNM2	Salzman2013
chr9_20907149_20916936_+	hsa_circ_0003537	9788	227	Hs68_RNase, Hs68_control, Helas3, H1hesc, Gm12878, Bj, Ag04450, A549, Nhek, Sknshra	LINE	ANNOTATED, CDS, coding, INTERNAL, OVCODE, OVEXON	NM_017794	KIAA1797	Jeck2013, Salzman2013
chr3_124560230_124592378_-	hsa_circ_0067080	32149	710	Nhek, H1hesc, Bj, Ag04450, A549, Sknshra, Mcf7	NA	ANNOTATED, CDS, coding, INTERNAL, OVCODE, OVEXON	NM_002213	ITGB5	Salzman2013
chr15_65445885_65447419_-	hsa_circ_0035877	1535	393	Ag04450	NA	ANNOTATED, CDS, coding, INTERNAL, OVCODE, OVEXON	NM_006660	CLPX	Salzman2013
chr1_35846860_35854683_+	hsa_circ_0000051	7824	1255	cd_19, Nhek, K562, Huvec, Hsmm, Helas3, H1hesc, Gm12878, Bj, Ag04450, A549, Sknshra	None	ANNOTATED, CDS, coding, INTERNAL	NM_005095	ZMYM4	Memczak2013, Salzman2013
chr4_186096940_186097205_-	hsa_circ_0004697	266	266	Hs68_RNase, Hs68_control, K562	None	ANNOTATED, CDS, coding, INTERNAL, OVCODE, OVEXON	NM_020827	KIAA1430	Jeck2013, Salzman2013
chr3_48209336_48219478_-	hsa_circ_0005467	10143	480	Hs68_RNase, Hs68_control, K562	None	ANNOTATED, CDS, coding, INTERNAL, OVCODE, OVEXON	NM_001789	CDC25A	Jeck2013, Salzman2013
chr4_151388825_151412187_-	hsa_circ_0006867	23363	450	Hs68_RNase, Hs68_control, K562, Hepg2, H1hesc, Gm12878, Ag04450, A549, Sknshra	None	ANNOTATED, CDS, coding, INTERNAL, OVCODE, OVEXON	NM_001199282	LRBA	Jeck2013, Salzman2013
chr12_123983091_123984083_-	hsa_circ_0007552	993	341	Hs68_RNase, Hs68_control, K562, Bj, Ag04450, Sknshra	None	ANNOTATED, CDS, coding, INTERNAL, OVCODE, OVEXON	NM_178314	RILPL1	Jeck2013, Salzman2013
chr13_100909849_100925600_+	hsa_circ_0000500	15752	428	cd_19, cd_34, Hs68_RNase, Hs68_control, K562, Gm12878, Mcf7	None	ANNOTATED, CDS, coding, INTERNAL, OVCODE, OVEXON	NM_001178004	PCCA	Jeck2013, Memczak2013, Salzman2013
chr9_125659558_125659855_-	hsa_circ_0088398	298	298	K562, Hepg2, Sknshra	NA	ANNOTATED, CDS, coding, INTERNAL, OVCODE, OVEXON, UTR5	NM_001100588	RC3H2	Salzman2013
chr11_9308002_9321248_-	hsa_circ_0021156	13247	585	K562, Gm12878	NA	ANNOTATED, CDS, coding, INTERNAL, OVCODE, OVERLAPTX, OVEXON	NM_015012	TMEM41B	Salzman2013
chr5_31431683_31451747_-	hsa_circ_0072049	20065	571	K562, Hepg2, H1hesc, Bj, Ag04450, A549, Sknshra	NA	ANNOTATED, CDS, coding, INTERNAL, OVCODE, OVERLAPTX, OVEXON	NM_013235	DROSHA	Salzman2013
chr14_69670634_69676918_+	hsa_circ_0032335	6285	554	K562	SINE	ANNOTATED, INTERNAL, ncRNA, OVCODE, OVERLAPTX, OVEXON	NR_034165	EXD2	Salzman2013
chr1_231930988_231954263_+	hsa_circ_0007848	23276	347	Hs68_RNase, Hs68_control	None	ANNOTATED, CDS, coding, INTERNAL, OVCODE, OVERLAPTX, OVEXON	NM_001164537	DISC1	Jeck2013
chr1_40733458_40737707_+	hsa_circ_0008985	4250	499	Hs68_RNase, Hs68_control	None	ANNOTATED, CDS, coding, INTERNAL, OVCODE, OVEXON	NM_005857	ZMPSTE24	Jeck2013
chr13_52992127_53001354_-	hsa_circ_0030342	9228	377	K562, Helas3, H1hesc, Gm12878, Ag04450, A549	NA	ANNOTATED, CDS, coding, INTERNAL, OVCODE, OVEXON	NM_016075	VPS36	Salzman2013
chr5_139818046_139828890_+	hsa_circ_0007402	10845	782	Hs68_RNase, Hs68_control, K562, Hepg2, Helas3, H1hesc, Gm12878, Ag04450, A549, Nhek	None	ANNOTATED, CDS, coding, INTERNAL, OVCODE, OVEXON	NM_020690	ANKHD1-EIF4EBP3	Jeck2013, Salzman2013
chr1_169199956_169256646_-	hsa_circ_0015154	56691	342	K562, Helas3	NA	ANNOTATED, CDS, coding, INTERNAL, OVCODE, OVEXON	NM_013330	NME7	Salzman2013
chr2_120720192_120725548_+	hsa_circ_0056262	5357	414	Gm12878	NA	ANNOTATED, CDS, coding, INTERNAL, OVCODE, OVEXON	NM_002830	PTPN4	Salzman2013
chr17_54926057_54933986_+	hsa_circ_0000786	7930	324	HEK293, cd_19, Hs68_RNase, Hs68_control, K562, Huvec, H1hesc, Gm12878, Bj, Sknshra	None	ANNOTATED, CDS, coding, INTERNAL, OVCODE, OVEXON	NM_003647	DGKE	Jeck2013, Memczak2013, Salzman2013
chr5_179132680_179133332_+	hsa_circ_0075291	653	248	K562, Helas3, H1hesc, Gm12878, Ag04450, A549, Nhek	LINE	ANNOTATED, CDS, coding, INTERNAL, OVCODE, OVEXON, UTR5	NM_001746	CANX	Salzman2013
chr1_197611841_197684204_-	hsa_circ_0006709	72364	590	Hs68_RNase, Hs68_control, Gm12878, Bj, Ag04450, Sknshra	None	ANNOTATED, CDS, coding, INTERNAL, OVCODE, OVEXON	NM_001195215	DENND1B	Jeck2013, Salzman2013
chr3_141811903_141820683_-	hsa_circ_0008304	8781	174	Hs68_RNase, Hs68_control	None	ANNOTATED, coding, INTERNAL, OVCODE, OVEXON, UTR5	NM_001178138	TFDP2	Jeck2013
chr7_156994415_157024021_+	hsa_circ_0001773	29607	1150	cd_34	None	ANNOTATED, CDS, coding, INTERNAL	NM_014671	UBE3C	Memczak2013
chr9_102866780_102888831_+	hsa_circ_0087754	22052	297	K562, A549, Nhek	NA	ANNOTATED, CDS, coding, INTERNAL, OVCODE, OVERLAPTX, OVEXON, UTR5	NM_014425	INVS	Salzman2013
chr7_47474880_47481653_-	hsa_circ_0008729	6774	399	Hs68_RNase, Hs68_control, Hepg2, Helas3, H1hesc, Bj, Ag04450, A549, Sknshra	None	ANNOTATED, CDS, coding, INTERNAL, OVCODE, OVEXON, UTR5	NM_022748	TNS3	Jeck2013, Salzman2013
chr10_909683_910210_-	hsa_circ_0017412	528	289	K562, Huvec, Hepg2, Helas3, Gm12878, Bj, Ag04450, A549, Sknshra, Mcf7	NA	ANNOTATED, CDS, coding, INTERNAL, OVCODE, OVEXON	NM_015155	LARP4B	Salzman2013
chr7_16664608_16676080_-	hsa_circ_0003637	11473	303	Hs68_RNase, Hs68_control, K562, Hepg2, Helas3, H1hesc, Ag04450	None	ANNOTATED, CDS, coding, INTERNAL, OVCODE, OVEXON	NM_020319	ANKMY2	Jeck2013, Salzman2013
chr1_1191425_1203372_-	hsa_circ_0009246	11948	624	K562, Ag04450, A549, Nhlf, Sknshra, Mcf7	NA	ANNOTATED, CDS, coding, INTERNAL, OVCODE, OVERLAPTX, OVEXON, UTR5	NM_194458	UBE2J2	Salzman2013
chr15_78337242_78346529_-	hsa_circ_0036441	9288	323	Helas3, H1hesc, Gm12878, Bj, Ag04450, A549	NA	ANNOTATED, CDS, coding, INTERNAL, OVCODE, OVEXON	NM_144572	TBC1D2B	Salzman2013
chr3_47702784_47712207_-	hsa_circ_0065259	9424	481	K562, Helas3	NA	ANNOTATED, CDS, coding, INTERNAL, OVCODE, OVEXON	NM_003074	SMARCC1	Salzman2013
chr5_37301539_37303516_-	hsa_circ_0003227	1978	399	Hs68_RNase, Hs68_control, K562, Hepg2, Helas3, H1hesc, Gm12878, Ag04450, A549	None	ANNOTATED, CDS, coding, INTERNAL, OVCODE, OVEXON	NM_153485	NUP155	Jeck2013, Salzman2013
chr12_27075549_27081838_-	hsa_circ_0025693	6290	589	K562, Hepg2, H1hesc, Gm12878, Ag04450	NA	ANNOTATED, CDS, coding, INTERNAL, OVCODE, OVEXON	NM_018164	C12orf11	Salzman2013
chr1_171537386_171544267_+	hsa_circ_0004412	6882	397	Hs68_RNase, Hs68_control, Nhek, K562, Huvec, Hepg2, Helas3, H1hesc, Gm12878, Bj, Ag04450, A549, Sknshra, Mcf7	None	ANNOTATED, CDS, coding, INTERNAL, OVCODE, OVEXON	NM_015172	PRRC2C	Jeck2013, Salzman2013
chr22_50563821_50566936_+	hsa_circ_0063878	3116	341	Bj	NA	ANNOTATED, CDS, coding, INTERNAL, OVCODE, OVEXON	NM_018995	MOV10L1	Salzman2013
chr5_176618885_176631293_+	hsa_circ_0075157	12409	309	K562	NA	ANNOTATED, CDS, coding, INTERNAL, OVCODE, OVEXON	NM_022455	NSD1	Salzman2013
chr13_113850495_113854830_-	hsa_circ_0030984	4336	272	K562, H1hesc, Gm12878, Ag04450, Sknshra	NA	ANNOTATED, CDS, coding, INTERNAL, OVCODE, OVEXON	NM_001127202	PCID2	Salzman2013
chr8_42317414_42323435_-	hsa_circ_0008015	6022	324	Hs68_RNase, Hs68_control, Nhek, K562, Huvec, Hepg2, Helas3, H1hesc, Gm12878, Bj, Ag04450, A549, Sknshra	None	ANNOTATED, CDS, coding, INTERNAL, OVCODE, OVEXON	NM_006749	SLC20A2	Jeck2013, Salzman2013
chr13_24410379_24415627_-	hsa_circ_0007891	5249	547	Hs68_RNase, Hs68_control	None	ANNOTATED, CDS, coding, INTERNAL, OVCODE, OVEXON	NM_005932	MIPEP	Jeck2013
chr12_22637631_22643152_-	hsa_circ_0025611	5522	288	K562, Gm12878	NA	ANNOTATED, CDS, coding, INTERNAL, OVCODE, OVEXON	NM_014802	KIAA0528	Salzman2013
chr3_197701248_197707375_+	hsa_circ_0068771	6128	509	Nhek, K562, Helas3	NA	ANNOTATED, CDS, coding, INTERNAL, OVCODE, OVEXON	NM_001136049	LMLN	Salzman2013
chr11_47804625_47808106_-	hsa_circ_0022058	3482	370	K562, Gm12878, Ag04450	NA	ANNOTATED, CDS, coding, INTERNAL, OVCODE, OVEXON	NM_015231	NUP160	Salzman2013
chr15_69728477_69729061_+	hsa_circ_0003166	585	283	Hs68_RNase, Hs68_control, K562, H1hesc, Gm12878, Ag04450, A549	None	ANNOTATED, CDS, coding, INTERNAL, OVCODE, OVEXON	NM_138555	KIF23	Jeck2013, Salzman2013
chr4_108603171_108615162_-	hsa_circ_0005965	11992	494	Hs68_RNase, Hs68_control, K562, Huvec, Hsmm, Helas3, Gm12878, Bj, Ag04450, Nhek, Mcf7	None	ANNOTATED, CDS, coding, INTERNAL, OVCODE, OVEXON	NM_005443	PAPSS1	Jeck2013, Salzman2013
chr1_94953098_94956803_+	hsa_circ_0013235	3706	489	K562, Hepg2, Gm12878, Ag04450	NA	ANNOTATED, CDS, coding, INTERNAL, OVCODE, OVEXON	NM_002858	ABCD3	Salzman2013
chr15_100801684_100871259_-	hsa_circ_0037062	69576	581	Mcf7	NA	ANNOTATED, CDS, coding, INTERNAL, OVCODE, OVEXON	NM_139057	ADAMTS17	Salzman2013
chr9_99154680_99160596_-	hsa_circ_0008842	5917	410	Hs68_RNase, Hs68_control	None	ANNOTATED, CDS, coding, INTERNAL, OVCODE, OVEXON	NM_153695	ZNF367	Jeck2013
chrX_67731691_67742759_+	hsa_circ_0004379	11069	535	Hs68_RNase, Hs68_control	None	ANNOTATED, CDS, coding, INTERNAL, OVCODE, OVEXON	NM_173834	YIPF6	Jeck2013
chr2_114697536_114699936_+	hsa_circ_0008712	2401	318	Hs68_RNase, Hs68_control, K562, Ag04450	None	ANNOTATED, CDS, coding, INTERNAL, OVCODE, OVEXON	NM_005721	ACTR3	Jeck2013, Salzman2013
chr11_20417349_20419267_+	hsa_circ_0021500	1919	305	K562, H1hesc, Bj	NA	ANNOTATED, CDS, coding, INTERNAL, OVCODE, OVEXON	NM_005788	PRMT3	Salzman2013
chr19_19675742_19680393_-	hsa_circ_0005126	4652	293	Hs68_RNase, Hs68_control, K562, Ag04450, Sknshra	None	ANNOTATED, CDS, coding, INTERNAL, OVCODE, OVEXON	NM_025245	PBX4	Jeck2013, Salzman2013
chr20_60888144_60888516_-	hsa_circ_0061082	373	297	Helas3, H1hesc, Nhlf	NA	ANNOTATED, CDS, coding, INTERNAL, OVCODE, OVEXON	NM_005560	LAMA5	Salzman2013
chr15_90984738_90986710_+	hsa_circ_0000652	1973	264	cd_19, Hs68_RNase, Hs68_control	None	ANNOTATED, CDS, coding, INTERNAL, OVCODE, OVEXON	NM_003870	IQGAP1	Jeck2013, Memczak2013
chr8_38105231_38109805_+	hsa_circ_0006724	4575	492	Hs68_RNase, Hs68_control, Gm12878	None	ANNOTATED, CDS, coding, INTERNAL, OVCODE, OVEXON	NM_015214	DDHD2	Jeck2013, Salzman2013
chr2_48573340_48573890_+	hsa_circ_0001002	551	551	cd_19, Hs68_RNase, Hs68_control	None	ANNOTATED, CDS, coding, INTERNAL, OVCODE, OVEXON, UTR5	NM_002158	FOXN2	Jeck2013, Memczak2013
chr7_30661009_30662078_+	hsa_circ_0009000	1070	254	Hs68_RNase, Hs68_control	None	ANNOTATED, CDS, coding, INTERNAL, OVCODE, OVEXON	NM_002047	GARS	Jeck2013
chr17_80361813_80364358_-	hsa_circ_0000815	2546	276	cd_19, Nhek, K562, Huvec, Hsmm, Hepg2, Helas3, H1hesc, Gm12878, Bj, Ag04450, A549, Sknshra	None	ANNOTATED, CDS, coding, INTERNAL	NM_024648	C17orf101	Memczak2013, Salzman2013
chr3_9495423_9506356_+	hsa_circ_0008465	10934	378	Hs68_RNase, Hs68_control, Nhek, K562, Hsmm, Hepg2, Helas3, H1hesc, Gm12878, Bj, Ag04450, A549, Sknshra	None	ANNOTATED, CDS, coding, INTERNAL, OVCODE, OVEXON	NM_001080517	SETD5	Jeck2013, Salzman2013
chr13_43986052_43987124_-	hsa_circ_0030151	1073	282	Hepg2, Helas3	NA	ANNOTATED, CDS, coding, INTERNAL, OVCODE, OVEXON, UTR5	NM_017993	ENOX1	Salzman2013
chr12_48477374_48491907_-	hsa_circ_0006222	14534	548	Hs68_RNase, Hs68_control	None	ANNOTATED, CDS, coding, INTERNAL, OVCODE, OVEXON	NM_014554	SENP1	Jeck2013
chr13_36857606_36869994_-	hsa_circ_0029999	12389	232	K562	NA	ANNOTATED, CDS, coding, INTERNAL, OVCODE, OVEXON	NM_001144981	CCDC169	Salzman2013
chr3_50677797_50679763_+	hsa_circ_0065871	1967	285	Nhek, K562, Hepg2, Helas3, H1hesc, Gm12878, Ag04450, A549, Sknshra, Mcf7	NA	ANNOTATED, CDS, coding, INTERNAL, OVCODE, OVEXON	NM_001243926	MAPKAPK3	Salzman2013
chr17_28003838_28030080_-	hsa_circ_0000753	26243	426	cd_34, K562, Helas3, H1hesc, Gm12878, Ag04450, A549, Sknshra	None	ANNOTATED, CDS, coding, INTERNAL	NM_033389	SSH2	Memczak2013, Salzman2013
chr3_195800801_195802231_-	hsa_circ_0068629	1431	398	K562, Hepg2, Helas3, H1hesc, A549, Sknshra, Mcf7	NA	ANNOTATED, CDS, coding, INTERNAL, OVCODE, OVEXON	NM_003234	TFRC	Salzman2013
chr2_69590677_69601245_-	hsa_circ_0007046	10569	342	Hs68_RNase, Hs68_control, K562, Bj, Ag04450	None	ANNOTATED, CDS, coding, INTERNAL, OVCODE, OVEXON	NM_001244710	GFPT1	Jeck2013, Salzman2013
chr3_142284963_142286996_-	hsa_circ_0067655	2034	233	Nhek, K562, Hepg2, Helas3, H1hesc, Bj, Ag04450, A549, Sknshra	NA	ANNOTATED, CDS, coding, INTERNAL, OVCODE, OVEXON	NM_001184	ATR	Salzman2013
chr6_159004986_159010814_+	hsa_circ_0001663	5829	324	HEK293, neutr, Hs68_RNase, Hs68_control, K562, Huvec, Hepg2, Helas3, H1hesc, Gm12878, Bj, Ag04450, A549, Nhek, Nhlf, Sknshra, Mcf7	None	ANNOTATED, CDS, coding, INTERNAL, OVCODE, OVEXON	NM_020823	TMEM181	Jeck2013, Memczak2013, Salzman2013
chr22_46096162_46125470_+	hsa_circ_0008472	29309	503	Hs68_RNase, Hs68_control, Nhek, K562, Huvec, H1hesc, Bj, Ag04450, A549, Sknshra	None	ANNOTATED, CDS, coding, INTERNAL, OVCODE, OVEXON	NM_013236	ATXN10	Jeck2013, Salzman2013
chr4_186168448_186188309_+	hsa_circ_0004874	19862	662	Hs68_RNase, Hs68_control	None	ANNOTATED, CDS, coding, INTERNAL, OVCODE, OVEXON, UTR5	NM_031953	SNX25	Jeck2013
chr7_131060183_131084192_+	hsa_circ_0001746	24010	605	HEK293, cd_19, neutr, Hs68_RNase, Hs68_control, Nhek, K562, Hepg2, Helas3, H1hesc, Gm12878, Bj, Ag04450, A549, Sknshra, Mcf7	None	ANNOTATED, CDS, coding, INTERNAL, OVCODE, OVEXON	NM_013255	MKLN1	Jeck2013, Memczak2013, Salzman2013
chr7_56150971_56151408_-	hsa_circ_0080285	438	230	K562	NA	ANNOTATED, CDS, coding, INTERNAL, OVCODE, OVERLAPTX, OVEXON	NM_006213	PHKG1	Salzman2013
chr6_105280917_105291173_-	hsa_circ_0077519	10257	208	K562, Huvec, Hepg2, Helas3, H1hesc, Gm12878, Bj, Ag04450, A549, Nhek, Sknshra	NA	ANNOTATED, CDS, coding, INTERNAL, OVCODE, OVERLAPTX, OVEXON	NM_020771	HACE1	Salzman2013
chr11_28080473_28084063_-	hsa_circ_0008854	3591	358	Hs68_RNase, Hs68_control	None	ANNOTATED, CDS, coding, INTERNAL, OVCODE, OVEXON	NM_031217	KIF18A	Jeck2013
chr7_129679304_129688984_-	hsa_circ_0004364	9681	347	Hs68_RNase, Hs68_control	None	ANNOTATED, CDS, coding, INTERNAL, OVCODE, OVEXON	NM_016478	ZC3HC1	Jeck2013
chr17_1746097_1747980_+	hsa_circ_0005946	1884	239	Hs68_RNase, Hs68_control, Nhek, K562, Huvec, Hsmm, Hmec, Hepg2, Helas3, H1hesc, Gm12878, Bj, Ag04450, A549, Sknshra, Mcf7	None	ANNOTATED, CDS, coding, INTERNAL, OVCODE, OVEXON	NM_002945	RPA1	Jeck2013, Salzman2013
chr6_136472298_136476896_+	hsa_circ_0002198	4599	329	Hs68_RNase, Hs68_control, Hepg2, Helas3, Bj, Ag04450, A549, Sknshra	None	ANNOTATED, CDS, coding, INTERNAL, OVCODE, OVEXON	NM_018945	PDE7B	Jeck2013, Salzman2013
chr5_95103750_95119667_+	hsa_circ_0073449	15918	462	K562, Hepg2, Helas3, Gm12878, Ag04450, Sknshra	NA	ANNOTATED, CDS, coding, INTERNAL, OVCODE, OVERLAPTX, OVEXON	NM_014899	RHOBTB3	Salzman2013
chr2_240078348_240085619_-	hsa_circ_0058905	7272	243	Helas3	NA	ANNOTATED, CDS, coding, INTERNAL, OVCODE, OVEXON	NM_006037	HDAC4	Salzman2013
chr5_72157635_72161556_+	hsa_circ_0002692	3922	241	Hs68_RNase, Hs68_control, K562, Huvec, Hsmm, Hepg2, Helas3, H1hesc, Gm12878, Bj, Ag04450, A549, Nhek, Sknshra, Mcf7	None	ANNOTATED, CDS, coding, INTERNAL, OVCODE, OVEXON	NM_002270	TNPO1	Jeck2013, Salzman2013
chr19_5641605_5641957_+	hsa_circ_0005104	353	272	Hs68_RNase, Hs68_control, K562, Gm12878	None	ANNOTATED, CDS, coding, INTERNAL, OVCODE, OVEXON	NM_001201338	SAFB	Jeck2013, Salzman2013
chr7_128845044_128846428_+	hsa_circ_0001742	1385	727	HEK293	None	ANNOTATED, CDS, coding, INTERNAL	NM_005631	SMO	Memczak2013
chr17_42512433_42541912_-	hsa_circ_0008709	29480	228	Hs68_RNase, Hs68_control, K562, Sknshra	None	ANNOTATED, INTERNAL, ncRNA, OVCODE, OVEXON	NR_036474	GPATCH8	Jeck2013, Salzman2013
chr3_128525215_128526514_+	hsa_circ_0008923	1300	348	Hs68_RNase, Hs68_control, Nhek, K562, Hepg2, Helas3, H1hesc, Gm12878, Bj, Ag04450, A549, Sknshra	None	ANNOTATED, CDS, coding, INTERNAL, OVCODE, OVEXON	NM_004637	RAB7A	Jeck2013, Salzman2013
chr7_104800954_104809712_-	hsa_circ_0081833	8759	392	A549	NA	ANNOTATED, CDS, coding, INTERNAL, OVCODE, OVEXON	NM_182691	SRPK2	Salzman2013
chr9_136277419_136278041_-	hsa_circ_0089371	623	338	K562, Huvec, Hepg2, Helas3, H1hesc, Gm12878, Bj, Ag04450, A549, Nhek, Mcf7	NA	ANNOTATED, CDS, coding, INTERNAL, OVCODE, OVEXON	NM_020385	REXO4	Salzman2013
chr3_127429419_127441409_-	hsa_circ_0007358	11991	338	Hs68_RNase, Hs68_control, Huvec, Helas3, Gm12878, Bj, Ag04450, A549	None	ANNOTATED, CDS, coding, INTERNAL, OVCODE, OVEXON	NM_007283	MGLL	Jeck2013, Salzman2013
chr4_148944414_148968202_+	hsa_circ_0071123	23789	311	Bj, Ag04450, A549, Nhek	NA	ANNOTATED, CDS, coding, INTERNAL, OVCODE, OVEXON	NM_024605	ARHGAP10	Salzman2013
chr2_61715300_61717911_-	hsa_circ_0054867	2612	426	K562, Helas3, Bj, A549	NA	ANNOTATED, CDS, coding, INTERNAL, OVCODE, OVEXON	NM_003400	XPO1	Salzman2013
chr22_32154532_32161046_+	hsa_circ_0062938	6515	221	Nhek, K562, Helas3, H1hesc, Gm12878, Bj, Ag04450, Sknshra	NA	ANNOTATED, CDS, coding, INTERNAL, OVCODE, OVEXON	NM_001242896	DEPDC5	Salzman2013
chr9_95040481_95048121_-	hsa_circ_0087504	7641	354	K562	NA	ANNOTATED, CDS, coding, INTERNAL, OVCODE, OVEXON	NM_013417	IARS	Salzman2013
chr14_71215546_71216798_-	hsa_circ_0032379	1253	325	Gm12878	Low_complexity	ANNOTATED, CDS, coding, INTERNAL, OVCODE, OVEXON	NM_033141	MAP3K9	Salzman2013
chr17_35343916_35378313_+	hsa_circ_0008691	34398	715	Hs68_RNase, Hs68_control	None	ANNOTATED, CDS, coding, INTERNAL, OVCODE, OVEXON	NM_012138	AATF	Jeck2013
chr1_33413823_33415375_-	hsa_circ_0000048	1553	351	cd_19, neutr, Hs68_RNase, Hs68_control, Nhek, K562, Huvec, Hsmm, Hmec, Hepg2, Helas3, H1hesc, Gm12878, Bj, Ag04450, A549, Sknshra, Mcf7	None	ANNOTATED, CDS, coding, INTERNAL, OVCODE, OVEXON	NM_153341	RNF19B	Jeck2013, Memczak2013, Salzman2013
chr17_4186093_4210418_-	hsa_circ_0004805	24326	504	Hs68_RNase, Hs68_control	None	ANNOTATED, CDS, coding, INTERNAL, OVCODE, OVEXON, UTR3	NM_003342	UBE2G1	Jeck2013
chr6_16326625_16328701_-	hsa_circ_0007132	2077	2077	Hs68_RNase, Hs68_control, Hepg2, Helas3, Gm12878, Bj, Ag04450, Nhek, Nhlf, Sknshra	None	ANNOTATED, CDS, coding, INTERNAL, OVCODE, OVEXON, UTR5	NM_000332	ATXN1	Jeck2013, Salzman2013
chr17_79563142_79575848_-	hsa_circ_0005221	12707	685	Hs68_RNase, Hs68_control, K562, Hepg2, Helas3, H1hesc, Gm12878, Bj, A549, Sknshra, Mcf7	None	ANNOTATED, CDS, coding, INTERNAL, OVCODE, OVEXON	NM_017921	NPLOC4	Jeck2013, Salzman2013
chr6_57017019_57025950_+	hsa_circ_0002638	8932	387	Hs68_RNase, Hs68_control, K562, Hepg2, Ag04450	None	ANNOTATED, CDS, coding, INTERNAL, OVCODE, OVEXON	NM_001031623	ZNF451	Jeck2013, Salzman2013
chr9_115013209_115060196_-	hsa_circ_0003458	46988	853	Hs68_RNase, Hs68_control, K562, Hsmm, Hepg2, Helas3, H1hesc, Gm12878, Bj, Ag04450, A549, Nhlf, Sknshra, Mcf7	None	ANNOTATED, CDS, coding, INTERNAL, OVCODE, OVEXON	NM_001163790	PTBP3	Jeck2013, Salzman2013
chr19_13039156_13039661_-	hsa_circ_0000896	506	338	cd_19, cd_34, Hs68_RNase, Hs68_control	None	ANNOTATED, CDS, coding, INTERNAL, OVCODE, OVEXON	NM_004461	FARSA	Jeck2013, Memczak2013
chr15_101775287_101775782_-	hsa_circ_0005019	496	496	Hs68_RNase, Hs68_control	None	ANNOTATED, CDS, coding, INTERNAL, OVCODE, OVEXON	NM_014918	CHSY1	Jeck2013
chr18_51797730_51800460_+	hsa_circ_0007180	2731	291	Hs68_RNase, Hs68_control, Nhek, K562, H1hesc, Gm12878, Bj, Ag04450, Sknshra	None	ANNOTATED, CDS, coding, INTERNAL, OVCODE, OVEXON	NM_007195	POLI	Jeck2013, Salzman2013
chr6_87920169_87928449_+	hsa_circ_0004383	8281	5822	Hs68_RNase, Hs68_control	None	ALT_ACCEPTOR, CDS, coding, INTERNAL, intronic, OVCODE, OVEXON	NM_015021	ZNF292	Jeck2013
chr12_49890616_49893988_+	hsa_circ_0026154	3373	313	Nhek, K562, Hepg2, H1hesc, Gm12878, Bj, Ag04450	NA	ANNOTATED, CDS, coding, INTERNAL, OVCODE, OVEXON	NM_023071	SPATS2	Salzman2013
chr3_33853564_33863574_+	hsa_circ_0064794	10011	253	Nhek, K562, Helas3, Bj, Ag04450, Sknshra, Mcf7	NA	ANNOTATED, CDS, coding, INTERNAL, OVCODE, OVEXON	NM_001162429	PDCD6IP	Salzman2013
chr15_49528048_49584734_+	hsa_circ_0035189	56687	701	K562, Hepg2, Helas3, Gm12878, Bj, Ag04450, A549, Sknshra, Mcf7	NA	ANNOTATED, CDS, coding, INTERNAL, OVCODE, OVERLAPTX, OVEXON	NM_001001556	GALK2	Salzman2013
chr15_67938569_67956983_+	hsa_circ_0004404	18415	262	Hs68_RNase, Hs68_control	None	ANNOTATED, CDS, coding, INTERNAL, OVCODE, OVEXON	NM_145160	MAP2K5	Jeck2013
chr8_28692809_28695293_-	hsa_circ_0083818	2485	227	Nhek, K562, Gm12878, Ag04450, Sknshra	NA	ANNOTATED, CDS, coding, INTERNAL, OVCODE, OVERLAPTX, OVEXON	NM_018250	INTS9	Salzman2013
chr2_201881714_201887655_-	hsa_circ_0057741	5942	282	Nhek, K562, Bj, Sknshra	NA	ANNOTATED, CDS, coding, INTERNAL, OVCODE, OVEXON	NM_173822	FAM126B	Salzman2013
chr3_47787398_47814426_-	hsa_circ_0065310	27029	206	Helas3, H1hesc	NA	ANNOTATED, CDS, coding, INTERNAL, OVCODE, OVERLAPTX, OVEXON	NM_003074	SMARCC1	Salzman2013
chr17_20107646_20109225_+	hsa_circ_0000745	1580	1580	HEK293, Nhek, K562, Huvec, Hepg2, Helas3, H1hesc, Gm12878, Bj, Ag04450, A549, Sknshra, Mcf7	None	ANNOTATED, CDS, coding, INTERNAL	NM_001033554	SPECC1	Memczak2013, Salzman2013
chr7_18705836_18706099_+	hsa_circ_0007904	264	264	Hs68_RNase, Hs68_control, Nhek, Gm12878, Bj, Sknshra	None	ANNOTATED, CDS, coding, INTERNAL, OVCODE, OVEXON	NM_178423	HDAC9	Jeck2013, Salzman2013
chr22_30374431_30387659_+	hsa_circ_0002954	13229	457	Hs68_RNase, Hs68_control, Nhek, K562, Hsmm, Hepg2, Helas3, H1hesc, Gm12878, Ag04450, Sknshra, Mcf7	None	ANNOTATED, CDS, coding, INTERNAL, OVCODE, OVEXON	NM_021090	MTMR3	Jeck2013, Salzman2013
chr5_54562966_54568003_-	hsa_circ_0001483	5038	750	cd_34, Hs68_RNase, Hs68_control, K562, Gm12878, Bj, Ag04450	None	ANNOTATED, CDS, coding, INTERNAL, OVCODE, OVEXON	NM_019030	DHX29	Jeck2013, Memczak2013, Salzman2013
chr3_128514203_128526514_+	hsa_circ_0006346	12312	536	Hs68_RNase, Hs68_control, K562, H1hesc, Gm12878, Bj, Ag04450, A549, Sknshra	None	ANNOTATED, CDS, coding, INTERNAL, OVCODE, OVEXON, UTR5	NM_004637	RAB7A	Jeck2013, Salzman2013
chr17_35640168_35646430_-	hsa_circ_0000759	6263	383	cd_19, Hs68_RNase, Hs68_control, Nhek, K562, Huvec, Hepg2, Helas3, H1hesc, Ag04450, Sknshra	None	ANNOTATED, CDS, coding, INTERNAL, OVCODE, OVEXON, UTR5	NM_198838	ACACA	Jeck2013, Memczak2013, Salzman2013
chr7_63796637_63797360_+	hsa_circ_0008543	724	223	Hs68_RNase, Hs68_control	None	ANNOTATED, CDS, coding, INTERNAL, OVCODE, OVEXON	NM_001170905	ZNF736	Jeck2013
chr9_98002931_98011651_-	hsa_circ_0007298	8721	423	Hs68_RNase, Hs68_control	None	ANNOTATED, CDS, coding, INTERNAL, OVCODE, OVEXON, UTR5	NM_000136	FANCC	Jeck2013
chr5_102432245_102433485_-	hsa_circ_0006499	1241	655	Hs68_RNase, Hs68_control, Gm12878, A549, Nhek	None	ANNOTATED, CDS, coding, INTERNAL, OVCODE, OVEXON	NM_017676	GIN1	Jeck2013, Salzman2013
chr14_76330010_76368567_+	hsa_circ_0007946	38558	497	Hs68_RNase, Hs68_control, H1hesc, Gm12878, Sknshra	None	ANNOTATED, CDS, coding, INTERNAL, OVCODE, OVEXON	NM_015072	TTLL5	Jeck2013, Salzman2013
chr6_150092298_150094305_+	hsa_circ_0006936	2008	137	Hs68_RNase, Hs68_control, K562, Huvec, Hepg2, Helas3, H1hesc, Gm12878, Bj, Ag04450, A549, Nhek, Sknshra	None	ANNOTATED, CDS, coding, INTERNAL, OVCODE, OVEXON	NM_005389	PCMT1	Jeck2013, Salzman2013
chr12_109072048_109095099_-	hsa_circ_0008081	23052	323	Hs68_RNase, Hs68_control, Nhek, K562, Huvec, Hepg2, Helas3, H1hesc, Gm12878, Bj, Ag04450, A549, Sknshra	None	ANNOTATED, CDS, coding, INTERNAL, OVCODE, OVEXON, UTR5	NM_014325	CORO1C	Jeck2013, Salzman2013
chr18_19371335_19399607_+	hsa_circ_0009149	28273	921	Hs68_RNase, Hs68_control	None	ANNOTATED, CDS, coding, INTERNAL, OVCODE, OVEXON	NM_020774	MIB1	Jeck2013
chr7_6470111_6476164_-	hsa_circ_0079365	6054	682	Gm12878, Ag04450, A549	NA	ANNOTATED, CDS, coding, INTERNAL, OVCODE, OVEXON	NM_139179	DAGLB	Salzman2013
chr2_32716492_32718734_+	hsa_circ_0053786	2243	262	Nhek, K562, Hepg2, Helas3, Gm12878, Ag04450, Sknshra	NA	ANNOTATED, CDS, coding, INTERNAL, OVCODE, OVEXON	NM_016252	BIRC6	Salzman2013
chr5_72370569_72373320_+	hsa_circ_0002490	2752	268	Hs68_RNase, Hs68_control, K562, Huvec, Hsmm, Hepg2, Helas3, H1hesc, Gm12878, Bj, Ag04450, A549, Nhek, Sknshra, Mcf7	None	ANNOTATED, CDS, coding, INTERNAL, OVCODE, OVEXON	NM_138782	FCHO2	Jeck2013, Salzman2013
chr14_74370663_74376133_+	hsa_circ_0032530	5471	423	Nhek, Hsmm, Hepg2, Gm12878	NA	ANNOTATED, CDS, coding, INTERNAL, OVCODE, OVERLAPTX, OVEXON	NM_001242924	ZNF410	Salzman2013
chr1_151214599_151215043_+	hsa_circ_0014132	445	277	Gm12878, Bj, Ag04450, Sknshra	NA	ANNOTATED, CDS, coding, INTERNAL, OVCODE, OVEXON	NM_001135638	PIP5K1A	Salzman2013
chr16_354304_364683_-	hsa_circ_0037158	10380	376	Nhek, K562, Huvec, Hsmm, Hepg2, Helas3, H1hesc, Gm12878, Bj, A549, Sknshra, Mcf7	NA	ANNOTATED, CDS, coding, INTERNAL, OVCODE, OVEXON	NM_003502	AXIN1	Salzman2013
chr12_50848097_50855130_+	hsa_circ_0003222	7034	317	Hs68_RNase, Hs68_control, K562, H1hesc, Gm12878, Ag04450, A549	None	ANNOTATED, CDS, coding, INTERNAL, OVCODE, OVEXON	NM_052879	LARP4	Jeck2013, Salzman2013
chr18_11752852_11753944_+	hsa_circ_0046941	1093	248	Nhek, Hepg2, Helas3, A549	NA	ANNOTATED, CDS, coding, INTERNAL, OVCODE, OVEXON	NM_002071	GNAL	Salzman2013
chr5_54941617_54952602_-	hsa_circ_0005680	10986	470	Hs68_RNase, Hs68_control	None	ANNOTATED, CDS, coding, INTERNAL, OVCODE, OVEXON	NM_173514	SLC38A9	Jeck2013
chr12_31595709_31600703_-	hsa_circ_0008445	4995	383	Hs68_RNase, Hs68_control, K562, Huvec, Gm12878, Ag04450, A549, Sknshra	None	ANNOTATED, CDS, coding, INTERNAL, OVCODE, OVEXON	NM_144973	DENND5B	Jeck2013, Salzman2013
chr12_49333438_49334971_-	hsa_circ_0003770	1534	477	Hs68_RNase, Hs68_control, K562, Huvec, Hepg2, Helas3, Bj, A549, Sknshra	None	ANNOTATED, CDS, coding, INTERNAL, OVCODE, OVEXON, UTR5	NM_001659	ARF3	Jeck2013, Salzman2013
chr6_17507400_17514185_+	hsa_circ_0002245	6786	336	Hs68_RNase, Hs68_control, Hsmm, Helas3, H1hesc, Gm12878, Ag04450, A549, Sknshra	None	ANNOTATED, CDS, coding, INTERNAL, OVCODE, OVEXON	NM_006366	CAP2	Jeck2013, Salzman2013
chr10_72604230_72619256_+	hsa_circ_0004977	15027	588	Hs68_RNase, Hs68_control	None	ANNOTATED, CDS, coding, INTERNAL, OVCODE, OVEXON	NM_003901	SGPL1	Jeck2013
chr2_239352983_239355296_+	hsa_circ_0004461	2314	658	Hs68_RNase, Hs68_control	None	ALT_DONOR, CDS, coding, INTERNAL, OVCODE, OVEXON, UTR3	NM_001040445	ASB1	Jeck2013
chr11_77336008_77336863_-	hsa_circ_0000343	856	210	cd_34, neutr, Hs68_RNase, Hs68_control, K562, Huvec, Hepg2, Helas3, H1hesc, Gm12878, Bj, Ag04450, A549, Sknshra	None	ANNOTATED, CDS, coding, INTERNAL, OVCODE, OVEXON	NM_001293	CLNS1A	Jeck2013, Memczak2013, Salzman2013
chr5_130651669_130651837_+	hsa_circ_0073823	169	169	K562, Gm12878, Ag04450	NA	ANNOTATED, coding, INTERNAL, OVEXON, UTR5	NM_020240	CDC42SE2	Salzman2013
chr17_76410960_76415756_+	hsa_circ_0045904	4797	279	K562, H1hesc, Gm12878, Bj, Ag04450, Sknshra	NA	ANNOTATED, CDS, coding, INTERNAL, OVCODE, OVEXON, UTR3	NM_024419	PGS1	Salzman2013
chr11_66589114_66590145_+	hsa_circ_0023033	1032	233	K562, Huvec, Hepg2, Helas3, H1hesc, Gm12878, Bj, Ag04450, A549, Nhek, Sknshra, Mcf7	NA	ANNOTATED, CDS, coding, INTERNAL, OVCODE, OVEXON	NM_024650	C11orf80	Salzman2013
chr21_32537279_32575328_-	hsa_circ_0061405	38050	603	Nhek, Gm12878, Ag04450	NA	ANNOTATED, CDS, coding, INTERNAL, OVCODE, OVEXON	NM_003253	TIAM1	Salzman2013
chr2_24786773_24807429_+	hsa_circ_0000983	20657	20657	cd_34	None	ALT_ACCEPTOR, coding, upstream_start, UTR5	NM_003743	NCOA1	Memczak2013
chr10_74468041_74475660_+	hsa_circ_0000246	7620	7620	cd_19, Hs68_RNase, Hs68_control	None	ALT_ACCEPTOR, ALT_DONOR, coding, INTERNAL, intronic	NM_138357	MCU	Jeck2013, Memczak2013
chrX_117538301_117544922_+	hsa_circ_0091365	6622	463	K562, Gm12878	NA	ANNOTATED, CDS, coding, INTERNAL, OVCODE, OVERLAPTX, OVEXON	NM_019045	WDR44	Salzman2013
chr3_75790427_75791016_-	hsa_circ_0003424	590	349	Hs68_RNase, Hs68_control, K562, H1hesc, Gm12878, Ag04450, A549, Sknshra	None	ALT_ACCEPTOR, CDS, coding, INTERNAL, intronic, OVCODE, OVEXON	NM_001128223	ZNF717	Jeck2013, Salzman2013
chr12_110778464_110780253_+	hsa_circ_0002628	1790	557	Hs68_RNase, Hs68_control, K562, Hepg2, H1hesc, Bj, Ag04450, A549, Sknshra	None	ANNOTATED, CDS, coding, INTERNAL, OVCODE, OVEXON	NM_170665	ATP2A2	Jeck2013, Salzman2013
chr2_10740979_10747437_-	hsa_circ_0007344	6459	396	Hs68_RNase, Hs68_control	None	ANNOTATED, CDS, coding, INTERNAL, OVCODE, OVEXON	NM_024894	NOL10	Jeck2013
chr11_12883797_12886447_+	hsa_circ_0006284	2651	128	Hs68_RNase, Hs68_control	None	ANNOTATED, CDS, coding, INTERNAL, OVCODE, OVEXON	NM_021961	TEAD1	Jeck2013
chr6_87925621_87955362_+	hsa_circ_0006768	29742	852	Hs68_RNase, Hs68_control	None	ANNOTATED, CDS, coding, INTERNAL, OVCODE, OVEXON	NM_015021	ZNF292	Jeck2013
chr17_28003838_28011702_-	hsa_circ_0042818	7865	257	Nhek, Hepg2, A549	NA	ANNOTATED, CDS, coding, INTERNAL, OVCODE, OVERLAPTX, OVEXON	NM_033389	SSH2	Salzman2013
chr6_36181657_36185787_+	hsa_circ_0009139	4131	601	Hs68_RNase, Hs68_control	None	ANNOTATED, CDS, coding, INTERNAL, OVCODE, OVEXON	NM_015695	BRPF3	Jeck2013
chr20_34446224_34451322_+	hsa_circ_0008695	5099	468	Hs68_RNase, Hs68_control	None	ANNOTATED, CDS, coding, INTERNAL, OVCODE, OVEXON	NM_016436	PHF20	Jeck2013
chr6_34935016_34937943_+	hsa_circ_0076078	2928	238	K562, Hepg2, H1hesc, Bj, Ag04450, Sknshra, Mcf7	NA	ANNOTATED, CDS, coding, INTERNAL, OVCODE, OVEXON	NM_015245	ANKS1A	Salzman2013
chr3_133894453_133914026_-	hsa_circ_0003633	19574	796	Hs68_RNase, Hs68_control, Nhek, K562, Huvec, Hepg2, Helas3, H1hesc, Gm12878, Bj, Ag04450, A549, Nhlf, Sknshra	None	ANNOTATED, CDS, coding, INTERNAL, OVCODE, OVEXON	NM_001005861	RYK	Jeck2013, Salzman2013
chr4_83799883_83803093_-	hsa_circ_0006618	3211	406	Hs68_RNase, Hs68_control, K562, H1hesc, Bj, Ag04450, Sknshra	None	ANNOTATED, CDS, coding, INTERNAL, OVCODE, OVEXON, UTR5	NM_001077207	SEC31A	Jeck2013, Salzman2013
chr4_1219148_1235307_-	hsa_circ_0001386	16160	702	HEK293, cd_19	None	ANNOTATED, CDS, coding, INTERNAL, UTR5	NM_001012614	CTBP1	Memczak2013
chr2_38542426_38546161_-	hsa_circ_0054133	3736	291	Ag04450	NA	ANNOTATED, CDS, coding, INTERNAL, OVCODE, OVERLAPTX, OVEXON	NM_022374	ATL2	Salzman2013
chr7_99701032_99701777_+	hsa_circ_0081426	746	255	Huvec, Hepg2, Gm12878, Bj, Ag04450, A549, Sknshra, Mcf7	NA	ANNOTATED, CDS, coding, INTERNAL, OVCODE, OVERLAPTX, OVEXON	NM_004722	AP4M1	Salzman2013
chr16_69189774_69197081_+	hsa_circ_0040029	7308	483	Nhek, Helas3, Gm12878, Ag04450, A549	NA	ANNOTATED, CDS, coding, INTERNAL, OVCODE, OVEXON	NM_032830	CIRH1A	Salzman2013
chr10_76598441_76603236_+	hsa_circ_0005164	4796	949	Hs68_RNase, Hs68_control, Nhek, Huvec, Hepg2, Helas3, H1hesc, Gm12878, Bj, Ag04450, A549, Nhlf, Sknshra	None	ANNOTATED, CDS, coding, INTERNAL, OVCODE, OVEXON, UTR5	NM_012330	KAT6B	Jeck2013, Salzman2013
chr19_41754419_41754725_+	hsa_circ_0002882	307	174	Hs68_RNase, Hs68_control, Nhek, Helas3, H1hesc, Bj, Ag04450, A549, Sknshra	None	ANNOTATED, CDS, coding, INTERNAL, OVCODE, OVEXON	NM_021913	AXL	Jeck2013, Salzman2013
chr21_40596334_40601362_-	hsa_circ_0001194	5029	382	cd_19, cd_34, Hs68_RNase, Hs68_control, K562, Huvec, H1hesc, Ag04450	None	ANNOTATED, CDS, coding, INTERNAL, OVCODE, OVEXON	NM_033656	BRWD1	Jeck2013, Memczak2013, Salzman2013
chr17_4186093_4200109_-	hsa_circ_0003239	14017	401	Hs68_RNase, Hs68_control, K562, Huvec, H1hesc, Gm12878, Bj, Ag04450, A549, Sknshra	None	ANNOTATED, CDS, coding, INTERNAL, OVCODE, OVEXON, UTR3	NM_003342	UBE2G1	Jeck2013, Salzman2013
chr7_6854395_6862991_-	hsa_circ_0003943	8597	390	Hs68_RNase, Hs68_control, Nhek, K562, Huvec, Hepg2, H1hesc, Gm12878, Bj, Ag04450, A549, Sknshra	None	ANNOTATED, CDS, coding, INTERNAL, OVCODE, OVEXON	NM_198097	CCZ1B	Jeck2013, Salzman2013
chr12_50824278_50829407_+	hsa_circ_0026232	5130	213	Ag04450	NA	ANNOTATED, CDS, coding, INTERNAL, OVCODE, OVERLAPTX, OVEXON	NM_052879	LARP4	Salzman2013
chr9_37126309_37305711_+	hsa_circ_0087046	179403	972	K562, Hepg2, Helas3, Gm12878, Bj, Sknshra	NA	ANNOTATED, CDS, coding, INTERNAL, OVCODE, OVERLAPTX, OVEXON, UTR5	NM_032226	ZCCHC7	Salzman2013
chr20_54956489_54959380_-	hsa_circ_0004887	2892	386	Hs68_RNase, Hs68_control, K562, Hepg2, Helas3, H1hesc, Gm12878, Ag04450, A549	None	ANNOTATED, CDS, coding, INTERNAL, OVCODE, OVEXON	NM_198433	AURKA	Jeck2013, Salzman2013
chr22_44229520_44237812_-	hsa_circ_0063697	8293	434	H1hesc, Sknshra	NA	ANNOTATED, CDS, coding, INTERNAL, OVCODE, OVEXON	NM_014351	SULT4A1	Salzman2013
chr5_137288317_137290065_-	hsa_circ_0008177	1749	423	Hs68_RNase, Hs68_control, Gm12878, Ag04450	None	ANNOTATED, CDS, coding, INTERNAL, OVCODE, OVEXON	NM_016603	FAM13B	Jeck2013, Salzman2013
chr4_102014933_102030235_-	hsa_circ_0070515	15303	523	Nhek	NA	ANNOTATED, CDS, coding, INTERNAL, OVCODE, OVEXON	NM_000944	PPP3CA	Salzman2013
chr14_80963812_80997230_-	hsa_circ_0007332	33419	415	Hs68_RNase, Hs68_control	None	ALT_DONOR, CDS, coding, INTERNAL, OVCODE, OVEXON, UTR3	NM_152446	CEP128	Jeck2013
chr2_68717322_68740812_+	hsa_circ_0003874	23491	526	Hs68_RNase, Hs68_control	None	ANNOTATED, CDS, coding, INTERNAL, OVCODE, OVEXON	NM_173545	APLF	Jeck2013
chr8_141874411_141935848_-	hsa_circ_0008778	61438	571	Hs68_RNase, Hs68_control	SINE	ANNOTATED, CDS, coding, INTERNAL, OVCODE, OVEXON, UTR5	NM_001199649	PTK2	Jeck2013
chr4_183812556_183836728_-	hsa_circ_0002212	24173	540	Hs68_RNase, Hs68_control	None	ALT_DONOR, CDS, coding, INTERNAL, OVCODE, OVEXON	NM_001012732	DCTD	Jeck2013
chr5_40728447_40730445_-	hsa_circ_0006141	1999	214	Hs68_RNase, Hs68_control	None	ANNOTATED, CDS, coding, INTERNAL, OVCODE, OVEXON	NM_012382	TTC33	Jeck2013
chr1_94360170_94363454_-	hsa_circ_0013222	3285	378	Nhek, K562, Helas3, H1hesc, Bj, Ag04450, A549	NA	ANNOTATED, CDS, coding, INTERNAL, OVCODE, OVEXON	NM_002061	GCLM	Salzman2013
chr9_133333788_133333976_+	hsa_circ_0089102	189	189	Hepg2, Helas3, H1hesc, Bj	NA	ANNOTATED, CDS, coding, INTERNAL, OVCODE, OVEXON	NM_000050	ASS1	Salzman2013
chr9_86294690_86297981_-	hsa_circ_0001867	3292	379	neutr, K562, Huvec, H1hesc, Gm12878, Ag04450, Nhek	None	ANNOTATED, CDS, coding, INTERNAL	NM_013438	UBQLN1	Memczak2013, Salzman2013
chr8_99538970_99541880_-	hsa_circ_0007545	2911	2911	Hs68_RNase, Hs68_control	LINE	ALT_ACCEPTOR, CDS, coding, INTERNAL, intronic, OVCODE, OVEXON	NM_006281	STK3	Jeck2013
chr16_66847467_66847749_-	hsa_circ_0039757	283	194	Nhek, K562, H1hesc, Gm12878, Ag04450, A549, Sknshra	NA	ANNOTATED, CDS, coding, INTERNAL, OVCODE, OVEXON	NM_001018159	NAE1	Salzman2013
chr17_80714041_80730383_+	hsa_circ_0006413	16343	454	Hs68_RNase, Hs68_control, Nhek, K562, Huvec, Hepg2, Helas3, H1hesc, Gm12878, Bj, Ag04450, A549, Nhlf, Sknshra, Mcf7	None	ANNOTATED, CDS, coding, INTERNAL, OVCODE, OVEXON	NM_005993	TBCD	Jeck2013, Salzman2013
chrX_44383248_44386611_-	hsa_circ_0007290	3364	403	Hs68_RNase, Hs68_control	None	ALT_DONOR, CDS, coding, INTERNAL, OVCODE, OVEXON, UTR3	NM_173794	FUNDC1	Jeck2013
chr1_54254806_54262817_-	hsa_circ_0006676	8012	477	Hs68_RNase, Hs68_control, K562, H1hesc	None	ANNOTATED, CDS, coding, INTERNAL, OVCODE, OVEXON	NM_018087	TMEM48	Jeck2013, Salzman2013
chr5_353845_376831_+	hsa_circ_0005694	22987	289	Hs68_RNase, Hs68_control, Gm12878, Bj, Nhlf, Mcf7	None	ANNOTATED, CDS, coding, INTERNAL, OVCODE, OVEXON	NM_020731	AHRR	Jeck2013, Salzman2013
chr20_57242546_57248767_+	hsa_circ_0060989	6222	729	K562, Hepg2, Gm12878	NA	ANNOTATED, CDS, coding, INTERNAL, OVCODE, OVEXON	NM_001001433	STX16	Salzman2013
chr4_54280782_54294350_+	hsa_circ_0007476	13569	359	Hs68_RNase, Hs68_control, K562, Huvec, Hepg2, Helas3, H1hesc, Gm12878, Bj, Ag04450, A549, Nhek, Sknshra, Mcf7	None	ANNOTATED, CDS, coding, INTERNAL, OVCODE, OVEXON	NM_030917	FIP1L1	Jeck2013, Salzman2013
chr16_984190_1004666_-	hsa_circ_0004652	20477	375	Hs68_RNase, Hs68_control	None	ALT_DONOR, INTERNAL, intronic, ncRNA, OVCODE, OVEXON	NR_033646	LMF1	Jeck2013
chr9_109734286_109746690_+	hsa_circ_0009029	12405	629	Hs68_RNase, Hs68_control, Huvec, H1hesc, Gm12878, Bj, Ag04450, A549, Nhek, Sknshra, Mcf7	None	ANNOTATED, CDS, coding, INTERNAL, OVCODE, OVERLAPTX, OVEXON	NM_021224	ZNF462	Jeck2013, Salzman2013
chr7_104702611_104707254_+	hsa_circ_0081813	4644	426	Nhek, K562, Hepg2, Helas3, H1hesc, Gm12878, Ag04450, A549, Sknshra	NA	ANNOTATED, CDS, coding, INTERNAL, OVCODE, OVERLAPTX, OVEXON	NM_182931	MLL5	Salzman2013
chr21_34793787_34805178_+	hsa_circ_0002113	11392	673	Hs68_RNase, Hs68_control, Nhek, Hepg2, Helas3, H1hesc, Gm12878, Bj, Ag04450, A549, Sknshra, Mcf7	None	ANNOTATED, CDS, coding, INTERNAL, OVCODE, OVERLAPTX, OVEXON	NM_005534	IFNGR2	Jeck2013, Salzman2013
chr22_50169239_50171461_-	hsa_circ_0007709	2223	529	Hs68_RNase, Hs68_control, Hepg2	None	ANNOTATED, CDS, coding, INTERNAL, OVCODE, OVEXON	NM_014577	BRD1	Jeck2013, Salzman2013
chr13_102047534_102051516_-	hsa_circ_0030789	3983	330	Helas3	NA	ANNOTATED, CDS, coding, INTERNAL, OVCODE, OVEXON, UTR5	NM_052867	NALCN	Salzman2013
chr3_170841385_170846667_-	hsa_circ_0067943	5283	512	Nhek, K562, A549, Sknshra	NA	ANNOTATED, CDS, coding, INTERNAL, OVCODE, OVEXON	NM_015028	TNIK	Salzman2013
chr9_33953283_33973235_-	hsa_circ_0003141	19953	536	Hs68_RNase, Hs68_control, K562, Huvec, Hepg2, Helas3, H1hesc, Gm12878, Bj, Ag04450, A549, Nhek, Sknshra	None	ANNOTATED, CDS, coding, INTERNAL, OVCODE, OVEXON	NM_018449	UBAP2	Jeck2013, Salzman2013
chr20_44444180_44444552_+	hsa_circ_0060551	373	265	K562, Huvec, Hepg2, Helas3, H1hesc, Gm12878, Bj, Ag04450, A549, Sknshra, Mcf7	NA	ANNOTATED, CDS, coding, INTERNAL, OVCODE, OVEXON	NM_181802	UBE2C	Salzman2013
chr3_172003716_172028671_+	hsa_circ_0002422	24956	464	Hs68_RNase, Hs68_control, K562, Helas3, Gm12878, A549	None	ANNOTATED, CDS, coding, INTERNAL, OVCODE, OVEXON	NM_022763	FNDC3B	Jeck2013, Salzman2013
chr5_39002637_39021238_-	hsa_circ_0001475	18602	295	cd_19, Hs68_RNase, Hs68_control, K562, Gm12878, Ag04450, A549	None	ANNOTATED, CDS, coding, INTERNAL, OVCODE, OVEXON	NM_152756	RICTOR	Jeck2013, Memczak2013, Salzman2013
chr14_76184204_76187046_+	hsa_circ_0032708	2843	302	Nhek, K562, Huvec, Helas3, Ag04450, A549, Sknshra	NA	ANNOTATED, CDS, coding, INTERNAL, OVCODE, OVEXON	NM_015072	TTLL5	Salzman2013
chr6_7187667_7189555_+	hsa_circ_0075561	1889	254	K562, Hepg2, Helas3, H1hesc, Gm12878, Bj, Ag04450, A549	NA	ANNOTATED, CDS, coding, INTERNAL, OVCODE, OVERLAPTX, OVEXON	NM_001003699	RREB1	Salzman2013
chr11_68190957_68193655_+	hsa_circ_0023216	2699	610	Helas3, Bj, Ag04450, A549, Nhlf, Sknshra, Mcf7	NA	ANNOTATED, CDS, coding, INTERNAL, OVCODE, OVERLAPTX, OVEXON	NM_002335	LRP5	Salzman2013
chr5_137284644_137284873_-	hsa_circ_0074069	230	230	K562, Gm12878, Nhek	NA	ANNOTATED, CDS, coding, INTERNAL, OVCODE, OVEXON	NM_016603	FAM13B	Salzman2013
chr1_44773982_44804994_-	hsa_circ_0007693	31013	547	Hs68_RNase, Hs68_control, Nhek, K562, Huvec, Hepg2, Helas3, H1hesc, Gm12878, Bj, Ag04450, A549, Nhlf, Sknshra, Mcf7	None	ANNOTATED, CDS, coding, INTERNAL, OVCODE, OVEXON	NM_024066	ERI3	Jeck2013, Salzman2013
chr7_107167682_107188777_-	hsa_circ_0006182	21096	246	Hs68_RNase, Hs68_control, K562	None	ANNOTATED, CDS, coding, INTERNAL, OVCODE, OVEXON	NM_001161520	COG5	Jeck2013, Salzman2013
chr17_47874112_47875920_+	hsa_circ_0044436	1809	417	K562, Hepg2, Helas3, H1hesc, Gm12878, Bj, A549	NA	ANNOTATED, CDS, coding, INTERNAL, OVCODE, OVEXON	NM_007067	KAT7	Salzman2013
chr6_101163338_101173579_-	hsa_circ_0008321	10242	414	Hs68_RNase, Hs68_control, K562, H1hesc, Gm12878, Bj, Ag04450, Nhek	None	ANNOTATED, CDS, coding, INTERNAL, OVCODE, OVEXON	NM_006828	ASCC3	Jeck2013, Salzman2013
chr16_88052034_88071617_+	hsa_circ_0040819	19584	656	Nhek, K562, Hepg2, Helas3, H1hesc, Gm12878, Bj, Ag04450, A549, Mcf7	NA	ANNOTATED, CDS, coding, INTERNAL, OVCODE, OVEXON	NM_001173542	BANP	Salzman2013
chr7_17908030_17937069_-	hsa_circ_0004671	29040	825	Hs68_RNase, Hs68_control, Helas3, Ag04450, Sknshra	None	ANNOTATED, CDS, coding, INTERNAL, OVCODE, OVEXON	NM_015132	SNX13	Jeck2013, Salzman2013
chr19_10694282_10694746_-	hsa_circ_0049282	465	225	Nhek, K562, H1hesc, Mcf7	NA	ANNOTATED, CDS, coding, INTERNAL, OVCODE, OVEXON	NM_005498	AP1M2	Salzman2013
chr9_36246028_36249394_-	hsa_circ_0087009	3367	658	Helas3, Gm12878, Ag04450	NA	ANNOTATED, CDS, coding, INTERNAL, OVCODE, OVEXON, UTR5	NM_005476	GNE	Salzman2013
chr2_203378442_203383775_+	hsa_circ_0008906	5334	434	Hs68_RNase, Hs68_control, Gm12878, Bj, A549	None	ANNOTATED, CDS, coding, INTERNAL, OVCODE, OVEXON	NM_001204	BMPR2	Jeck2013, Salzman2013
chr8_15508206_15519805_+	hsa_circ_0083391	11600	400	K562, H1hesc, A549	NA	ANNOTATED, CDS, coding, INTERNAL, OVCODE, OVEXON	NM_006765	TUSC3	Salzman2013
chr3_149563798_149639014_+	hsa_circ_0001346	75217	716	cd_19, cd_34, Hs68_RNase, Hs68_control, Nhek, K562, Huvec, Hepg2, Helas3, H1hesc, Gm12878, Bj, Ag04450, A549, Sknshra, Mcf7	None	ANNOTATED, CDS, coding, INTERNAL, OVCODE, OVEXON, UTR5	NM_183381	RNF13	Jeck2013, Memczak2013, Salzman2013
chr2_169547544_169574488_+	hsa_circ_0007024	26945	380	Hs68_RNase, Hs68_control, Nhek, K562, Hepg2, Helas3, H1hesc, Gm12878, Bj, Ag04450, A549, Sknshra, Mcf7	None	ANNOTATED, CDS, coding, INTERNAL, OVCODE, OVEXON	NM_203463	CERS6	Jeck2013, Salzman2013
chr6_2116005_2117790_-	hsa_circ_0075450	1786	198	K562, Helas3, Bj	NA	ANNOTATED, CDS, coding, INTERNAL, OVCODE, OVEXON	NM_001500	GMDS	Salzman2013
chr17_35687113_35687365_-	hsa_circ_0043269	253	253	Nhek, K562, Helas3, Ag04450	NA	ANNOTATED, CDS, coding, INTERNAL, OVCODE, OVEXON, UTR5	NM_198839	ACACA	Salzman2013
chr9_33953283_33956144_-	hsa_circ_0003945	2862	258	Hs68_RNase, Hs68_control, K562, Huvec, Hepg2, Helas3, H1hesc, Gm12878, Bj, Ag04450, A549, Nhek, Sknshra	None	ANNOTATED, CDS, coding, INTERNAL, OVCODE, OVEXON	NM_018449	UBAP2	Jeck2013, Salzman2013
chr8_97318672_97343323_+	hsa_circ_0008303	24652	418	Hs68_RNase, Hs68_control, K562, Hepg2, Helas3, Gm12878, Bj, Ag04450, A549	None	ANNOTATED, CDS, coding, INTERNAL, OVCODE, OVEXON	NM_014754	PTDSS1	Jeck2013, Salzman2013
chr2_231624674_231658046_+	hsa_circ_0003898	33373	441	Hs68_RNase, Hs68_control, K562, Ag04450, A549	None	ANNOTATED, CDS, coding, INTERNAL, OVCODE, OVEXON, UTR5	NM_001130849	CAB39	Jeck2013, Salzman2013
chr8_37330596_37333530_-	hsa_circ_0008933	2935	304	Hs68_RNase, Hs68_control	None	ANNOTATED, INTERNAL, ncRNA, OVEXON	TCONS_00014973	TCONS_00014973	Jeck2013
chr1_114372214_114377061_-	hsa_circ_0000110	4848	356	neutr, K562, Gm12878	None	ANNOTATED, CDS, coding, INTERNAL	NM_015967	PTPN22	Memczak2013, Salzman2013
chr2_135010666_135012215_+	hsa_circ_0001068	1550	1550	cd_19, Hs68_RNase, Hs68_control	None	ALT_ACCEPTOR, CDS, coding, OVCODE, OVEXON, upstream_start, UTR5	NM_002410	MGAT5	Jeck2013, Memczak2013
chr14_23395342_23396023_-	hsa_circ_0031250	682	327	Nhek, K562, Huvec, Hepg2, Helas3, H1hesc, Gm12878, A549, Sknshra	NA	ANNOTATED, CDS, coding, INTERNAL, OVCODE, OVERLAPTX, OVEXON	NM_001039619	PRMT5	Salzman2013
chr17_41201138_41209152_-	hsa_circ_0043949	8015	213	Hepg2, Helas3, Ag04450, A549	NA	ANNOTATED, CDS, coding, INTERNAL, OVCODE, OVEXON	NM_007300	BRCA1	Salzman2013
chr2_239090706_239093928_-	hsa_circ_0001116	3223	411	HEK293, cd_19, cd_34, neutr, Hs68_RNase, Hs68_control, Nhek, K562, Huvec, Helas3, H1hesc, Gm12878, Bj, Ag04450, A549, Sknshra, Mcf7	None	ANNOTATED, CDS, coding, INTERNAL, OVCODE, OVEXON	NM_030768	ILKAP	Jeck2013, Memczak2013, Salzman2013
chr10_72462068_72468534_+	hsa_circ_0004606	6467	348	Hs68_RNase, Hs68_control, K562, H1hesc, Bj, Ag04450, Nhlf, Sknshra	None	ANNOTATED, CDS, coding, INTERNAL, OVCODE, OVEXON	NM_139155	ADAMTS14	Jeck2013, Salzman2013
chr1_44750507_44804994_-	hsa_circ_0007437	54488	620	Hs68_RNase, Hs68_control, K562, Huvec, Helas3, H1hesc, Gm12878, Bj, Ag04450, A549	None	ANNOTATED, CDS, coding, INTERNAL, OVCODE, OVEXON	NM_024066	ERI3	Jeck2013, Salzman2013
chr19_34921481_34929671_+	hsa_circ_0006987	8191	443	Hs68_RNase, Hs68_control, Nhek, K562, Huvec, Hepg2, Helas3, H1hesc, Gm12878, Bj, Ag04450, A549, Sknshra	None	ANNOTATED, CDS, coding, INTERNAL, OVCODE, OVEXON	NM_005499	UBA2	Jeck2013, Salzman2013
chr2_37543380_37544322_-	hsa_circ_0000992	943	943	HEK293, cd_19	None	ALT_ACCEPTOR, CDS, coding, upstream_start, UTR5	NM_005813	PRKD3	Memczak2013
chr12_64456697_64480806_+	hsa_circ_0027385	24110	635	Nhek, H1hesc, Bj, Ag04450, A549	NA	ANNOTATED, CDS, coding, INTERNAL, OVCODE, OVERLAPTX, OVEXON	NM_020762	SRGAP1	Salzman2013
chr5_167915607_167919852_+	hsa_circ_0009145	4246	324	Hs68_RNase, Hs68_control, K562, Hepg2, Helas3, Bj, Ag04450, A549, Sknshra	None	ANNOTATED, CDS, coding, INTERNAL, OVCODE, OVEXON	NM_002887	RARS	Jeck2013, Salzman2013
chr7_95820421_95838289_-	hsa_circ_0081185	17869	426	Gm12878	NA	ANNOTATED, CDS, coding, INTERNAL, OVCODE, OVEXON	NM_001160210	SLC25A13	Salzman2013
chr15_90760671_90764997_+	hsa_circ_0000650	4327	704	cd_19, Hs68_RNase, Hs68_control, Nhek, K562, Hepg2, Helas3, H1hesc, Gm12878, Bj, Ag04450, A549, Nhlf, Sknshra, Mcf7	None	ANNOTATED, CDS, coding, INTERNAL, OVCODE, OVEXON	NM_020210	SEMA4B	Jeck2013, Memczak2013, Salzman2013
chr22_28290543_28310335_-	hsa_circ_0062688	19793	436	Nhek, K562, Huvec, Hepg2, Helas3, Gm12878, Bj, Ag04450, A549, Sknshra, Mcf7	NA	ANNOTATED, CDS, coding, INTERNAL, OVCODE, OVEXON	NM_012399	PITPNB	Salzman2013
chr9_125042722_125054119_+	hsa_circ_0003250	11398	367	Hs68_RNase, Hs68_control, K562, Hmec, Hepg2, H1hesc, Gm12878, Bj, Ag04450, A549, Nhek, Sknshra, Mcf7	None	ANNOTATED, CDS, coding, INTERNAL, OVCODE, OVEXON	NM_138777	MRRF	Jeck2013, Salzman2013
chr22_46085592_46098727_+	hsa_circ_0004243	13136	531	Hs68_RNase, Hs68_control, Nhek, K562, H1hesc, Gm12878, Bj, Ag04450, A549	None	ANNOTATED, CDS, coding, INTERNAL, OVCODE, OVEXON	NM_013236	ATXN10	Jeck2013, Salzman2013
chr17_80842021_80869665_+	hsa_circ_0004382	27645	563	Hs68_RNase, Hs68_control, Nhek, K562, Huvec, Hepg2, Helas3, H1hesc, Gm12878, Bj, Ag04450, A549, Sknshra, Mcf7	None	ANNOTATED, CDS, coding, INTERNAL, OVCODE, OVEXON	NM_005993	TBCD	Jeck2013, Salzman2013
chr14_62193424_62194373_+	hsa_circ_0032136	950	316	K562, Hepg2, A549	NA	ANNOTATED, CDS, coding, INTERNAL, OVCODE, OVERLAPTX, OVEXON	NM_001530	HIF1A	Salzman2013
chrX_44833911_44879975_+	hsa_circ_0090323	46065	230	Helas3	NA	ANNOTATED, CDS, coding, INTERNAL, OVCODE, OVERLAPTX, OVEXON	NM_021140	KDM6A	Salzman2013
chr15_72324835_72338975_-	hsa_circ_0002506	14141	1006	Hs68_RNase, Hs68_control, Hsmm, H1hesc, Gm12878, Bj, Ag04450	None	ANNOTATED, CDS, coding, INTERNAL, OVCODE, OVEXON, UTR5	NM_006901	MYO9A	Jeck2013, Salzman2013
chr7_23650790_23651172_+	hsa_circ_0001684	383	383	cd_19, neutr, Hs68_RNase, Hs68_control, Nhek, K562, H1hesc, Gm12878, Bj, Ag04450, Sknshra	None	ANNOTATED, CDS, coding, INTERNAL, OVCODE, OVEXON, UTR5	NM_138771	CCDC126	Jeck2013, Memczak2013, Salzman2013
chr11_110007388_110008139_+	hsa_circ_0005348	752	752	Hs68_RNase, Hs68_control, K562, Huvec, Gm12878, Ag04450, Nhek	None	ANNOTATED, CDS, coding, INTERNAL, OVCODE, OVEXON	NM_033390	ZC3H12C	Jeck2013, Salzman2013
chr6_79752560_79770535_-	hsa_circ_0001615	17976	411	HEK293, cd_19, neutr, Hs68_RNase, Hs68_control, K562, Huvec, Hepg2, Helas3, H1hesc, Gm12878, Bj, Ag04450, A549, Nhek, Sknshra, Mcf7	None	ANNOTATED, CDS, coding, INTERNAL, OVCODE, OVEXON	NM_017934	PHIP	Jeck2013, Memczak2013, Salzman2013
chr16_15973661_15978062_-	hsa_circ_0003349	4402	283	Hs68_RNase, Hs68_control	None	ANNOTATED, CDS, coding, INTERNAL, OVCODE, OVEXON	NM_144600	FOPNL	Jeck2013
chr12_936208_939326_+	hsa_circ_0024960	3119	379	Hepg2, A549	NA	ANNOTATED, CDS, coding, INTERNAL, OVCODE, OVEXON	NM_001184985	WNK1	Salzman2013
chr12_1136914_1137738_+	hsa_circ_0000373	825	825	HEK293, cd_19, Hs68_RNase, Hs68_control, Nhek, K562, Helas3, Bj, Ag04450, A549	None	ANNOTATED, CDS, coding, INTERNAL, ncRNA, OVCODE, OVEXON, UTR5	NM_178040	ERC1	Jeck2013, Memczak2013, Salzman2013
chr11_61205097_61205585_+	hsa_circ_0000311	489	334	cd_34, Hs68_RNase, Hs68_control, K562, Huvec, Hepg2, Helas3, H1hesc, Gm12878, Bj, Ag04450, A549, Nhek, Nhlf, Sknshra	None	ANNOTATED, CDS, coding, INTERNAL, OVCODE, OVEXON	NM_017841	SDHAF2	Jeck2013, Memczak2013, Salzman2013
chr3_119219542_119232566_+	hsa_circ_0006884	13025	402	Hs68_RNase, Hs68_control, Nhek, K562, Hepg2, Helas3, H1hesc, Gm12878, Bj, Ag04450, A549, Nhlf, Sknshra	None	ANNOTATED, CDS, coding, INTERNAL, OVCODE, OVEXON	NM_016589	TIMMDC1	Jeck2013, Salzman2013
chr1_115005726_115006178_-	hsa_circ_0013637	453	278	K562, Helas3, H1hesc, Bj, Ag04450, A549	NA	ANNOTATED, CDS, coding, INTERNAL, OVCODE, OVERLAPTX, OVEXON	NM_015906	TRIM33	Salzman2013
chr21_42609440_42622828_+	hsa_circ_0061775	13389	733	Helas3, Bj, Mcf7	NA	ANNOTATED, CDS, coding, INTERNAL, OVCODE, OVEXON	NM_012105	BACE2	Salzman2013
chr16_58709844_58710250_-	hsa_circ_0004541	407	173	Hs68_RNase, Hs68_control, Hepg2, Helas3, H1hesc, Bj, Ag04450, A549	None	ANNOTATED, CDS, coding, INTERNAL, OVCODE, OVEXON	NM_018231	SLC38A7	Jeck2013, Salzman2013
chrX_106331666_106332069_-	hsa_circ_0002995	404	404	Hs68_RNase, Hs68_control, K562, Gm12878, Nhek	None	ANNOTATED, CDS, coding, INTERNAL, OVCODE, OVEXON	NM_001171080	RBM41	Jeck2013, Salzman2013
chr16_11815433_11830089_-	hsa_circ_0009128	14657	539	Hs68_RNase, Hs68_control, K562, Hepg2, Gm12878, Bj	None	ANNOTATED, CDS, coding, INTERNAL, OVCODE, OVEXON	NM_015914	TXNDC11	Jeck2013, Salzman2013
chr1_225742608_225755116_-	hsa_circ_0016662	12509	344	Nhek, H1hesc, Bj, Ag04450, A549, Sknshra	NA	ANNOTATED, CDS, coding, INTERNAL, OVCODE, OVERLAPTX, OVEXON	NM_001008493	ENAH	Salzman2013
chr1_197621365_197643299_-	hsa_circ_0015797	21935	321	Helas3, Bj	NA	ANNOTATED, CDS, coding, INTERNAL, OVCODE, OVEXON	NM_001195215	DENND1B	Salzman2013
chr2_172821859_172823470_+	hsa_circ_0006532	1612	514	Hs68_RNase, Hs68_control, K562, Helas3, H1hesc, Gm12878, Ag04450, A549, Sknshra	None	ANNOTATED, CDS, coding, INTERNAL, OVCODE, OVEXON	NM_003642	HAT1	Jeck2013, Salzman2013
chr15_93540187_93541851_+	hsa_circ_0000655	1665	413	cd_19, Hs68_RNase, Hs68_control, Bj	None	ANNOTATED, CDS, coding, INTERNAL, OVCODE, OVEXON	NM_001271	CHD2	Jeck2013, Memczak2013, Salzman2013
chr19_5604594_5604947_-	hsa_circ_0000880	354	263	cd_19, cd_34	None	ANNOTATED, CDS, coding, INTERNAL	NM_014649	SAFB2	Memczak2013
chr3_12353879_12422990_+	hsa_circ_0064335	69112	472	A549	NA	ANNOTATED, CDS, coding, INTERNAL, OVCODE, OVERLAPTX, OVEXON, UTR5	NM_138711	PPARG	Salzman2013
chr13_103275227_103280274_+	hsa_circ_0008881	5048	396	Hs68_RNase, Hs68_control	None	ANNOTATED, CDS, coding, INTERNAL, OVCODE, OVEXON	NM_003291	TPP2	Jeck2013
chr2_190593386_190609514_+	hsa_circ_0005644	16129	1026	Hs68_RNase, Hs68_control	None	ANNOTATED, CDS, coding, INTERNAL, OVCODE, OVEXON	NM_144708	ANKAR	Jeck2013
chr10_103432672_103436193_-	hsa_circ_0000255	3522	415	cd_19, Hs68_RNase, Hs68_control, Nhek, K562, Hepg2, H1hesc, Gm12878, Bj, Ag04450, A549, Sknshra, Mcf7	None	ANNOTATED, CDS, coding, INTERNAL, OVCODE, OVEXON	NM_022039	FBXW4	Jeck2013, Memczak2013, Salzman2013
chr9_134888551_134889854_-	hsa_circ_0006825	1304	1304	Hs68_RNase, Hs68_control	None	ALT_DONOR, CDS, coding, INTERNAL, intronic, OVCODE, OVEXON	NM_004269	MED27	Jeck2013
chr6_157357969_157406039_+	hsa_circ_0001658	48071	48071	cd_19, Hs68_RNase, Hs68_control, K562, Huvec, Hepg2, Helas3, H1hesc, Gm12878, Bj, Ag04450, A549, Nhek, Nhlf, Sknshra, Mcf7	None	ALT_ACCEPTOR, CDS, coding, INTERNAL, intronic, OVCODE, OVEXON	NM_017519	ARID1B	Jeck2013, Memczak2013, Salzman2013
chr8_18622959_18662408_-	hsa_circ_0002111	39450	538	Hs68_RNase, Hs68_control, Nhek, Huvec, Hsmm, Hepg2, Helas3, H1hesc, Bj, Ag04450, A549, Sknshra, Mcf7	None	ANNOTATED, CDS, coding, INTERNAL, OVCODE, OVEXON	NM_015310	PSD3	Jeck2013, Salzman2013
chr6_17665470_17669777_-	hsa_circ_0007268	4308	363	Hs68_RNase, Hs68_control, K562, Hepg2, H1hesc, Gm12878, Ag04450, Nhek, Sknshra	None	ANNOTATED, CDS, coding, INTERNAL, OVCODE, OVEXON	NM_005124	NUP153	Jeck2013, Salzman2013
chr8_124089351_124096580_+	hsa_circ_0085438	7230	442	Nhek, K562, Hepg2, H1hesc, Gm12878, Ag04450	NA	ANNOTATED, CDS, coding, INTERNAL, OVCODE, OVEXON	NM_145647	WDR67	Salzman2013
chr6_155108995_155114110_+	hsa_circ_0078373	5116	316	K562, Hsmm, Helas3, Gm12878, Bj, Ag04450	NA	ANNOTATED, CDS, coding, INTERNAL, OVCODE, OVEXON	NM_014892	SCAF8	Salzman2013
chr15_64592518_64592922_-	hsa_circ_0007949	405	405	Hs68_RNase, Hs68_control, K562, Gm12878, Ag04450	None	ANNOTATED, CDS, coding, INTERNAL, OVCODE, OVEXON, UTR5	NM_022048	CSNK1G1	Jeck2013, Salzman2013
chr1_231506308_231509845_-	hsa_circ_0000196	3538	257	HEK293, Hs68_RNase, Hs68_control, K562, Huvec, Helas3, H1hesc, Gm12878, Bj, Ag04450, A549, Nhlf, Sknshra	None	ANNOTATED, CDS, coding, INTERNAL, OVCODE, OVEXON	NM_022051	EGLN1	Jeck2013, Memczak2013, Salzman2013
chr10_26994215_27009288_+	hsa_circ_0008134	15074	382	Hs68_RNase, Hs68_control, H1hesc	None	ANNOTATED, CDS, coding, INTERNAL, OVCODE, OVEXON	NM_014317	PDSS1	Jeck2013, Salzman2013
chr11_59426339_59426942_-	hsa_circ_0004162	604	299	Hs68_RNase, Hs68_control, K562, Hepg2, Helas3, H1hesc, Gm12878, Ag04450, A549, Sknshra	None	ANNOTATED, CDS, coding, INTERNAL, OVCODE, OVEXON	NM_152716	PATL1	Jeck2013, Salzman2013
chr1_54506429_54509198_-	hsa_circ_0012634	2770	317	K562, H1hesc, Bj	NA	ANNOTATED, CDS, coding, INTERNAL, OVCODE, OVEXON	NM_004872	TMEM59	Salzman2013
chr17_57808782_57816308_+	hsa_circ_0006508	7527	440	Hs68_RNase, Hs68_control, Nhek, K562, Huvec, Hepg2, Helas3, H1hesc, Gm12878, Bj, Ag04450, A549, Sknshra, Mcf7	None	ANNOTATED, CDS, coding, INTERNAL, OVCODE, OVEXON, UTR5	NM_030938	VMP1	Jeck2013, Salzman2013
chr17_40990748_40991397_+	hsa_circ_0007635	650	279	Hs68_RNase, Hs68_control, Nhek, K562, Helas3, H1hesc, Gm12878, Ag04450, Sknshra	None	ANNOTATED, CDS, coding, INTERNAL, OVCODE, OVEXON	NM_005789	PSME3	Jeck2013, Salzman2013
chr15_71952869_71953073_+	hsa_circ_0036140	205	205	Nhek, Hepg2, Bj, A549, Sknshra	NA	ANNOTATED, CDS, coding, INTERNAL, OVCODE, OVEXON	NM_024817	THSD4	Salzman2013
chr20_62559688_62562375_+	hsa_circ_0007609	2688	504	Hs68_RNase, Hs68_control, Nhek, K562, Huvec, Hsmm, Hepg2, Helas3, H1hesc, Gm12878, Bj, Ag04450, A549, Sknshra, Mcf7	None	ANNOTATED, CDS, coding, INTERNAL, OVCODE, OVEXON, UTR5	NM_025219	DNAJC5	Jeck2013, Salzman2013
chr22_32874968_32881196_+	hsa_circ_0001222	6229	665	cd_19, Hs68_RNase, Hs68_control, Nhek, K562, Hsmm, Hepg2, Helas3, H1hesc, Gm12878, Bj, Ag04450, A549, Sknshra, Mcf7	None	ANNOTATED, CDS, coding, INTERNAL, OVCODE, OVEXON	NM_012179	FBXO7	Jeck2013, Memczak2013, Salzman2013
chr15_67956935_68040939_+	hsa_circ_0036034	84005	336	Mcf7	NA	ANNOTATED, CDS, coding, INTERNAL, OVCODE, OVERLAPTX, OVEXON	NM_145160	MAP2K5	Salzman2013
chr9_6849507_6893232_+	hsa_circ_0003124	43726	486	Hs68_RNase, Hs68_control, K562, Helas3, Gm12878, Bj, Ag04450, Nhek	None	ANNOTATED, CDS, coding, INTERNAL, OVCODE, OVEXON	NM_015061	KDM4C	Jeck2013, Salzman2013
chr10_93756126_93768032_+	hsa_circ_0007578	11907	504	Hs68_RNase, Hs68_control	None	ANNOTATED, CDS, coding, INTERNAL, OVCODE, OVEXON	NM_003972	BTAF1	Jeck2013
chr5_138994171_138994551_+	hsa_circ_0006716	381	216	Hs68_RNase, Hs68_control, K562, Hepg2, Helas3, H1hesc, Gm12878, Bj, Ag04450, A549, Nhek, Sknshra	None	ANNOTATED, CDS, coding, INTERNAL, OVCODE, OVEXON	NM_181838	UBE2D2	Jeck2013, Salzman2013
chr17_79027468_79031767_+	hsa_circ_0046092	4300	163	Nhek, K562, Helas3, Ag04450	NA	ANNOTATED, CDS, coding, INTERNAL, OVCODE, OVEXON	NM_006340	BAIAP2	Salzman2013
chr17_49340635_49346265_+	hsa_circ_0002789	5631	280	Hs68_RNase, Hs68_control	None	ANNOTATED, CDS, coding, INTERNAL, OVCODE, OVEXON	NM_016001	UTP18	Jeck2013
chr13_42693231_42703768_+	hsa_circ_0003760	10538	8560	Hs68_RNase, Hs68_control	None	ALT_ACCEPTOR, CDS, coding, INTERNAL, intronic, OVCODE, OVEXON	NM_178009	DGKH	Jeck2013
chr14_80971255_80997230_-	hsa_circ_0032815	25976	301	Hepg2, H1hesc, Bj, A549, Nhlf	NA	ANNOTATED, CDS, coding, INTERNAL, OVCODE, OVEXON	NM_152446	CEP128	Salzman2013
chr5_167915607_167924353_+	hsa_circ_0001551	8747	777	cd_19, cd_34, neutr, Hs68_RNase, Hs68_control, K562, Hepg2, Helas3, Gm12878, Bj, Ag04450, A549, Nhek, Sknshra	None	ANNOTATED, CDS, coding, INTERNAL, OVCODE, OVEXON	NM_002887	RARS	Jeck2013, Memczak2013, Salzman2013
chr14_71511850_71524441_+	hsa_circ_0001997	12592	985	Hs68_RNase, Hs68_control, Hepg2, Helas3, Bj, Ag04450	None	ANNOTATED, CDS, coding, INTERNAL, OVCODE, OVEXON	NM_014982	PCNX	Jeck2013, Salzman2013
chrX_71681854_71715118_-	hsa_circ_0006172	33265	568	Hs68_RNase, Hs68_control, Helas3	None	ANNOTATED, CDS, coding, INTERNAL, OVCODE, OVEXON	NM_018486	HDAC8	Jeck2013, Salzman2013
chr17_953290_1003975_-	hsa_circ_0007919	50686	1545	Hs68_RNase, Hs68_control, Helas3	None	ANNOTATED, CDS, coding, INTERNAL, OVCODE, OVEXON	NM_001159746	ABR	Jeck2013, Salzman2013
chr20_25612794_25615463_+	hsa_circ_0059685	2670	2670	K562, Hepg2, H1hesc, Gm12878, Bj, A549, Sknshra, Mcf7	SINE	INTERGENIC	None	None	Salzman2013
chr15_64066893_64067848_-	hsa_circ_0007112	956	956	Hs68_RNase, Hs68_control, K562, Huvec, Gm12878	None	ANNOTATED, CDS, coding, INTERNAL, OVCODE, OVEXON, UTR5	NM_003922	HERC1	Jeck2013, Salzman2013
chr13_51501543_51509135_+	hsa_circ_0030286	7593	372	Nhek, K562, Gm12878	NA	ANNOTATED, CDS, coding, INTERNAL, OVCODE, OVEXON	NM_001142279	RNASEH2B	Salzman2013
chr7_77212872_77230123_+	hsa_circ_0080838	17252	410	K562, Ag04450	NA	ANNOTATED, CDS, coding, INTERNAL, OVCODE, OVEXON	NM_002835	PTPN12	Salzman2013
chr7_92921015_92926555_+	hsa_circ_0002620	5541	419	Hs68_RNase, Hs68_control	None	ANNOTATED, CDS, coding, INTERNAL, OVCODE, OVEXON	NM_017667	CCDC132	Jeck2013
chr17_1339914_1340449_-	hsa_circ_0004445	536	536	Hs68_RNase, Hs68_control	None	ANNOTATED, CDS, coding, INTERNAL, OVCODE, OVEXON	NM_016823	CRK	Jeck2013
chr17_18188456_18188834_-	hsa_circ_0008652	379	280	Hs68_RNase, Hs68_control, K562, H1hesc, Gm12878, Sknshra	None	ANNOTATED, CDS, coding, INTERNAL, OVCODE, OVEXON	NM_004618	TOP3A	Jeck2013, Salzman2013
chr11_66985202_66995634_+	hsa_circ_0023065	10433	397	Bj	NA	ANNOTATED, CDS, coding, INTERNAL, OVCODE, OVEXON	NM_012308	KDM2A	Salzman2013
chr2_48065998_48066908_-	hsa_circ_0003872	911	355	Hs68_RNase, Hs68_control, K562, Huvec, Helas3, H1hesc, Gm12878, Ag04450, A549, Sknshra	None	ANNOTATED, CDS, coding, INTERNAL, OVCODE, OVEXON	NM_001190274	FBXO11	Jeck2013, Salzman2013
chr21_34804484_34805178_+	hsa_circ_0001185	695	318	cd_19, neutr, Hs68_RNase, Hs68_control	None	ANNOTATED, CDS, coding, INTERNAL, OVCODE, OVERLAPTX, OVEXON	NM_005534	IFNGR2	Jeck2013, Memczak2013
chr5_77423854_77461496_-	hsa_circ_0001501	37643	801	cd_19, Hs68_RNase, Hs68_control	None	ANNOTATED, CDS, coding, INTERNAL, OVCODE, OVEXON	NM_003664	AP3B1	Jeck2013, Memczak2013
chr10_1130343_1151207_+	hsa_circ_0007796	20865	707	Hs68_RNase, Hs68_control, Nhek, K562, Huvec, Hepg2, Helas3, H1hesc, Gm12878, Bj, Ag04450, A549, Sknshra, Mcf7	None	ANNOTATED, CDS, coding, INTERNAL, OVCODE, OVEXON	NM_014023	WDR37	Jeck2013, Salzman2013
chr7_140402666_140404763_+	hsa_circ_0007518	2098	249	Hs68_RNase, Hs68_control, Nhek, K562, Huvec, Hsmm, Hepg2, Helas3, H1hesc, Gm12878, Bj, Ag04450, A549, Nhlf, Sknshra, Mcf7	None	ANNOTATED, CDS, coding, INTERNAL, OVCODE, OVEXON, UTR3	NM_004546	NDUFB2	Jeck2013, Salzman2013
chr9_138905045_138908275_-	hsa_circ_0089513	3231	369	K562, Helas3, Gm12878, Bj, Ag04450, A549, Nhek	NA	ANNOTATED, CDS, coding, INTERNAL, OVCODE, OVEXON	NM_144653	NACC2	Salzman2013
chr16_46940754_46943839_+	hsa_circ_0039220	3086	378	Ag04450	NA	ANNOTATED, CDS, coding, INTERNAL, OVCODE, OVEXON	NM_133443	GPT2	Salzman2013
chr20_20512331_20527476_-	hsa_circ_0059567	15146	426	Helas3, Sknshra	NA	ANNOTATED, CDS, coding, INTERNAL, OVCODE, OVEXON	NM_020343	RALGAPA2	Salzman2013
chr6_161455291_161471011_+	hsa_circ_0078617	15721	1555	K562, Hepg2, Helas3, H1hesc, Gm12878, Ag04450, Nhek, Sknshra	NA	ANNOTATED, CDS, coding, INTERNAL, OVCODE, OVEXON	NM_005922	MAP3K4	Salzman2013
chr1_59787208_59844509_+	hsa_circ_0005354	57302	568	Hs68_RNase, Hs68_control, Nhek, K562, Huvec, Hsmm, Hepg2, Helas3, H1hesc, Gm12878, Bj, Ag04450, A549, Sknshra	None	ANNOTATED, CDS, coding, INTERNAL, OVCODE, OVEXON, UTR5	NM_001113411	FGGY	Jeck2013, Salzman2013
chr5_32724804_32739136_+	hsa_circ_0072107	14333	290	Ag04450	NA	ANNOTATED, CDS, coding, INTERNAL, OVCODE, OVEXON	NM_001204375	NPR3	Salzman2013
chr20_47881253_47882803_-	hsa_circ_0004254	1551	281	Hs68_RNase, Hs68_control	None	ANNOTATED, CDS, coding, INTERNAL, OVCODE, OVEXON	NM_021035	ZNFX1	Jeck2013
[truncated: 2,951 more rows]

## Sheet: B_TSCD_Adult
ID	Sample_ID	Junction	Algorithm	BS reads	Symbol	CircRNA Type	Region	Strand	MRE	RBP	Genomic
chr1_44877652_44881895_+	adipose_adult_37_year_male	2	circRNAfinder,CIRI,find_circ	7.60656	RNF220	exon	mRNA	+	miR-1207-5p/4763-3p,7mer-m8|miR-1343-3p/6783-3p,8mer-1a|miR-145-3p,7mer-m8|miR-1470,7mer-1a|miR-15b-3p,7mer-m8|miR-2110,7mer-m8|miR-2110,7mer-m8|miR-2467-3p,7mer-m8|miR-3127-5p,7mer-m8|miR-324-5p,7mer-1a|miR-3667-3p,8mer-1a|miR-3667-5p,7mer-1a|miR-3918,7mer-1a|miR-3938,7mer-m8|miR-4264,7mer-m8|miR-4271/4725-3p/6780-5p,7mer-1a|miR-4271/4725-3p/6780-5p,7mer-1a|miR-4436-3p/4632-5p/6735-5p/6879-5p/78…	n/a	4243
chr3_10128817_10130634_+	adipose_adult_37_year_male	2	circRNAfinder,CIRI	7.60656	FANCD2,FANCD2OS	exon	mRNA	+,-	miR-1-3p/206/613,7mer-m8|miR-106a-3p,7mer-1a|miR-135-3p,8mer-1a|miR-135b-3p,7mer-m8|miR-149-5p,7mer-1a|miR-204-3p/4646-5p,7mer-m8|miR-2276-3p,8mer-1a|miR-3064-5p/6504-5p,8mer-1a|miR-3134,7mer-1a|miR-340-5p,7mer-m8|miR-3652/4430,7mer-1a|miR-3688-3p,7mer-m8|miR-4280,7mer-m8|miR-4302,7mer-1a|miR-4491/4657,7mer-m8|miR-4505/5787,7mer-1a|miR-4534/8082,7mer-1a|miR-4697-3p,7mer-m8|miR-4738-3p,7mer-m8|miR…	eIF4AIII|IGF2BP1|FXR2|AGO2|PTB|AGO1|IGF2BP3|FMRP|IGF2BP2|U2AF65	1817
chr9_130931330_130943078_-	adipose_adult_37_year_male	3	circRNAfinder,CIRI	8.19152	CIZ1	exon	mRNA	-	miR-1237-3p,7mer-m8|miR-1251-5p,8mer-1a|miR-138-1-3p,7mer-m8|miR-139-3p,7mer-1a|miR-26b-3p,7mer-1a|miR-3182,7mer-m8|miR-328-5p/6885-5p,7mer-1a|miR-3672/6864-3p,7mer-1a|miR-3682-5p,7mer-m8|miR-4652-3p,7mer-m8|miR-4659-3p,7mer-m8|miR-4667-5p/4700-5p/8089,7mer-1a|miR-4684-5p,7mer-1a|miR-4778-3p,7mer-m8|miR-4788,8mer-1a|miR-483-3p.1,7mer-m8|miR-483-3p.1,7mer-1a|miR-517-5p,7mer-1a|miR-5193,7mer-1a|miR…	eIF4AIII|IGF2BP3|FMRP|AGO2|IGF2BP2|IGF2BP1|DGCR8	11748
chr9_126319848_126371760_-	adipose_adult_37_year_male	3	CIRI	8.19152	DENND1A	exon	mRNA	-	miR-135-5p,7mer-m8|miR-181a-3p,7mer-m8|miR-3119,7mer-1a|miR-331-5p,7mer-1a|miR-362-5p/500-5p,7mer-1a|miR-423-3p,8mer-1a|miR-450a-5p,7mer-m8|miR-4534/8082,7mer-m8|miR-4681,7mer-1a|miR-4737,7mer-1a|miR-4786-3p,7mer-m8|miR-501-5p,7mer-1a|miR-6509-5p,7mer-m8|miR-6514-5p,7mer-m8|miR-6841-5p,7mer-m8	eIF4AIII|AGO2	51912
chr1_47753222_47765824_-	adipose_adult_37_year_male	3	circRNAfinder,CIRI	8.19152	STIL	exon	mRNA	-	miR-152-5p,7mer-m8|miR-2116-5p,7mer-m8|miR-302a-5p,7mer-1a|miR-3613-3p,7mer-1a|miR-371-5p,7mer-1a|miR-371-5p/373-5p/616-5p,8mer-1a|miR-372-5p,7mer-1a|miR-4263,8mer-1a|miR-452-3p,7mer-1a|miR-4521,8mer-1a|miR-4671-5p,7mer-1a|miR-548at-5p,7mer-m8|miR-548g-3p,7mer-1a|miR-5571-5p,8mer-1a|miR-576-5p,7mer-1a|miR-651-3p,7mer-1a|miR-6818-3p,7mer-1a|miR-6844,7mer-m8	AGO2|U2AF65|eIF4AIII|AGO1|FMRP|DGCR8|HuR|IGF2BP3	12602
chr7_48033911_48035743_-	adipose_adult_37_year_male	2	circRNAfinder,CIRI,find_circ	7.60656	SUN3	exon	mRNA	-	let-7-5p/98-5p/miR-4458/4500,7mer-m8|miR-1289,7mer-1a|miR-1827,7mer-m8|miR-1910-5p,7mer-m8|miR-196-5p,7mer-m8|miR-23-5p,8mer-1a|miR-3121-5p,7mer-1a|miR-3198/4309,7mer-m8|miR-34-5p/2682-5p,7mer-m8|miR-3674,8mer-1a|miR-369-5p,7mer-1a|miR-370-5p,7mer-m8|miR-4254,7mer-m8|miR-4294,8mer-1a|miR-4308,7mer-m8|miR-4725-5p,7mer-m8|miR-4732-5p,7mer-1a|miR-504-5p.1,7mer-m8|miR-6767-3p,7mer-1a|miR-6793-5p,7mer…	n/a	1832
chr14_54875462_54882648_+	adipose_adult_37_year_male	2	circRNAfinder,CIRI	7.60656	CDKN3	exon	mRNA	+	miR-15-5p/16-5p/195-5p/424-5p/497-5p/6838-5p,7mer-1a|miR-150-5p,8mer-1a|miR-2116-3p,7mer-1a|miR-302bd-5p,7mer-1a|miR-3156-5p,7mer-m8|miR-3691-3p,7mer-m8|miR-4520-2-3p,8mer-1a|miR-4520-3p,7mer-1a|miR-4524-5p,7mer-m8|miR-4529-3p,7mer-1a|miR-4659-3p,8mer-1a|miR-4691-5p/6792-3p,7mer-m8|miR-4713-5p,7mer-m8|miR-503-5p,7mer-1a|miR-513-3p/3606-3p,7mer-1a|miR-532-3p,7mer-1a|miR-582-3p,7mer-1a|miR-646,8mer…	U2AF65|eIF4AIII	7186
chr19_14551954_14552255_+	adipose_adult_37_year_male	5	circRNAfinder,CIRI	8.92848	PKN1	exon	mRNA	+	miR-1251-5p,7mer-m8|miR-1293/4483,7mer-1a|miR-1301-5p/6502-5p,8mer-1a|miR-29-3p,7mer-m8|miR-363-5p/6745,7mer-1a|miR-3677-3p,7mer-m8|miR-381-5p,7mer-1a|miR-425-3p,7mer-m8|miR-4284,7mer-m8|miR-4636,7mer-m8|miR-4690-5p,7mer-1a|miR-4707-5p,7mer-m8|miR-4737,7mer-m8|miR-4755-3p,7mer-m8|miR-6068,7mer-m8|miR-6165,7mer-1a|miR-6510-5p,8mer-1a|miR-6748-5p,7mer-m8|miR-6756-5p/6766-5p,7mer-1a|miR-6828-5p,7mer…	FMRP|eIF4AIII|FUS|AGO2	301
chr14_50130032_50133131_-	adipose_adult_37_year_male	2	CIRI	7.60656	POLE2	exon	mRNA	-	miR-1262/4701-3p/6736-5p,7mer-m8|miR-1272,7mer-m8|miR-1273d,8mer-1a|miR-3682-3p,7mer-1a|miR-375,7mer-1a|miR-433-3p,7mer-m8|miR-4509,7mer-m8|miR-4683,7mer-m8|miR-4781-3p,7mer-m8|miR-4788,7mer-1a|miR-548m,7mer-1a|miR-5694,7mer-m8|miR-582-5p,7mer-1a|miR-6505-5p,8mer-1a|miR-6746-5p,8mer-1a|miR-6748-5p,7mer-m8|miR-6771-5p,7mer-m8|miR-9-5p,7mer-1a	LIN28|eIF4AIII	3099
chr10_33552573_33552801_-	adipose_adult_37_year_male,adipose_adult_53_year_female	4,2	CIRI,find_circ	8.60655572355684,7.3597373209881,8.3597373209881	NRP1	exon	mRNA	-	miR-1182,7mer-m8|miR-193a-5p,7mer-m8|miR-2277-3p,7mer-m8|miR-27a-5p,7mer-m8|miR-3162-3p,7mer-m8|miR-3684,7mer-1a|miR-3691-5p,7mer-1a|miR-4475,8mer-1a|miR-4752,8mer-1a|miR-5580-5p,7mer-1a|miR-624-3p,7mer-1a|miR-6753-5p,7mer-1a|miR-6833-5p,7mer-1a|miR-6892-5p,7mer-m8|miR-7702,7mer-1a|miR-8056,7mer-1a|miR-8083,7mer-m8	HuR|AGO2|eIF4AIII|IGF2BP1	228
chr12_72052409_72054207_-	adipose_adult_37_year_male,adipose_omentum_adult_37_year_male	3,2	circRNAfinder,CIRI,find_circ	8.191518224278,7.42051668140838	ZFC3H1	intron	mRNA	-	miR-155-3p,7mer-1a|miR-202-5p,7mer-1a|miR-3685,8mer-1a|miR-384,7mer-1a|miR-4642,7mer-1a|miR-4700-3p,7mer-1a|miR-4719,7mer-m8|miR-4778-3p,7mer-1a|miR-548-3p/1323,7mer-m8|miR-6740-3p,8mer-1a|miR-6761-3p,7mer-1a|miR-6771-3p,7mer-1a	U2AF65	1798
chr3_23996027_23996294_+	adipose_adult_37_year_male,adipose_omentum_adult_51_year_female	4,3	circRNAfinder,CIRI,find_circ	8.60655572355684,8.09278425748783	NR1D2	exon	mRNA	+	miR-1207-5p/4763-3p,7mer-m8|miR-1228-3p,7mer-1a|miR-1228-3p,8mer-1a|miR-1295-3p,7mer-1a|miR-1304-5p,7mer-m8|miR-1915-3p/6764-5p,7mer-1a|miR-3158-3p,7mer-m8|miR-3160-3p,7mer-1a|miR-3188,7mer-1a|miR-3655,7mer-1a|miR-3929/4419/4478,7mer-m8|miR-3975,7mer-1a|miR-4487,8mer-1a|miR-4511,7mer-m8|miR-4663,7mer-m8|miR-4705,7mer-m8|miR-4726-3p,8mer-1a|miR-485-5p/6884-5p,8mer-1a|miR-558,7mer-1a|miR-6077,7mer-…	U2AF65|FMRP|UPF1|HuR|SFRS1|eIF4AIII	267
chr3_196812450_196831876_-	adipose_adult_51_year_female	3	circRNAfinder,CIRI,find_circ	8.19387	DLG1	exon	mRNA	-	miR-1178-5p,7mer-m8|miR-1255-3p,7mer-1a|miR-1289,7mer-1a|miR-3145-5p,7mer-1a|miR-3198/4309,7mer-m8|miR-4294,8mer-1a|miR-4639-3p,7mer-m8|miR-5003-5p,7mer-1a|miR-508-5p,8mer-1a|miR-579-3p/664-3p,7mer-m8|miR-601,7mer-1a|miR-6512-3p/6720-5p,7mer-m8|miR-6777-3p,7mer-m8|miR-6849-3p,8mer-1a|miR-766-3p,7mer-m8	LIN28|eIF4AIII|DGCR8|PTB|AGO2|FMRP|HuR	19426
chrX_2644300_2656297_+	adipose_adult_51_year_female	3	circRNAfinder	8.19387	n/a	intergenic	Unknown	Unknown	miR-1207-3p,7mer-m8|miR-1256,7mer-1a|miR-1306-3p,7mer-m8|miR-149-5p,7mer-m8|miR-3180/3180-3p/3196/6816-5p,7mer-1a|miR-3194-3p,7mer-m8|miR-3943,7mer-m8|miR-4520-5p,7mer-1a|miR-4532,8mer-1a|miR-4642,7mer-1a|miR-4664-3p,7mer-m8|miR-5580-5p,7mer-m8|miR-661,7mer-m8|miR-6822-3p,7mer-1a|miR-6822-3p,7mer-1a|miR-6852-5p,7mer-m8|miR-6856-3p,7mer-m8|miR-760,7mer-1a|miR-760,8mer-1a|miR-8057,7mer-m8|miR-8057,…	eIF4AIII|LIN28|FUS|AGO1	11997
chr17_1145231_1145485_-	adipose_adult_51_year_female	8	circRNAfinder,CIRI,find_circ	9.60891	n/a	intergenic	Unknown	Unknown	miR-223-5p,7mer-m8|miR-3145-3p,7mer-1a|miR-340-3p/6827-3p,7mer-m8|miR-3686,7mer-1a|miR-451a,7mer-1a|miR-4652-3p,7mer-1a|miR-4742-3p,8mer-1a|miR-4743-3p,7mer-1a|miR-4768-5p/6833-3p,8mer-1a|miR-6809-3p,7mer-1a|miR-6830-3p,7mer-1a|miR-6845-3p,7mer-1a|miR-6873-3p,7mer-1a	n/a	254
chr1_225306921_225311316_+	adipose_adult_51_year_female	2,4	CIRI,find_circ	7.60890980202441,8.60890980202441	DNAH14	exon	mRNA	+	miR-1208,7mer-m8|miR-1255-3p,8mer-1a|miR-1255-5p,8mer-1a|miR-139-5p,7mer-1a|miR-140-3p.1,7mer-1a|miR-2355-3p,7mer-m8|miR-26b-3p,7mer-m8|miR-3120-3p,7mer-1a|miR-3690,7mer-1a|miR-3692-3p,8mer-1a|miR-383-3p,7mer-m8|miR-4252,7mer-m8|miR-4254,7mer-1a|miR-4691-3p,7mer-m8|miR-587,8mer-1a|miR-624-5p,7mer-m8|miR-634,7mer-1a|miR-6500-3p,7mer-m8|miR-6744-5p,7mer-1a	eIF4AIII	4395
chr15_69715497_69718796_+	adipose_adult_51_year_female	2	circRNAfinder,CIRI,find_circ	7.60891	KIF23	exon	mRNA	+	let-7a-2-3p/7g-3p,8mer-1a|let-7c-3p,7mer-1a|miR-101-5p,7mer-m8|miR-106a-3p,7mer-1a|miR-136-5p,7mer-1a|miR-138-1-3p,7mer-1a|miR-154-3p/487-3p,7mer-1a|miR-20a-3p,7mer-1a|miR-2276-3p,7mer-1a|miR-324-5p,7mer-1a|miR-3607-3p,7mer-1a|miR-3655,7mer-m8|miR-3686,7mer-m8|miR-378/6839-5p,7mer-1a|miR-4686,7mer-1a|miR-4772-3p,7mer-1a|miR-4782-5p/5706,7mer-m8|miR-493-5p,7mer-1a|miR-514-5p,7mer-m8|miR-518-5p,7me…	eIF4AIII|FMRP|LIN28B|DGCR8|U2AF65|HuR|LIN28|IGF2BP3|ZC3H7B	3299
chr11_31477806_31484852_-	adipose_adult_51_year_female,adipose_adult_53_year_female	2	circRNAfinder,CIRI,find_circ	7.60890980202441,7.3597373209881	IMMP1L	exon	mRNA	-	miR-1245-3p,7mer-1a|miR-186-5p,7mer-1a|miR-196-5p,7mer-m8|miR-3133,7mer-1a|miR-3171,7mer-m8|miR-340-3p/6827-3p,7mer-m8|miR-383-5p.1,7mer-1a|miR-409-5p,7mer-m8|miR-4266,7mer-1a|miR-4330,8mer-1a|miR-4433b-3p,8mer-1a|miR-4509,7mer-1a|miR-454-5p,8mer-1a|miR-4744,8mer-1a|miR-4772-5p,8mer-1a|miR-4798-5p,8mer-1a|miR-651-5p,7mer-1a	eIF4AIII	7046
chr2_10281980_10282502_+	adipose_adult_53_year_female	2	find_circ	7.35974	C2orf48	exon	mRNA	+	miR-1254/3116,7mer-m8|miR-1273g-3p,7mer-1a|miR-150-5p,7mer-1a|miR-181a-2-3p,7mer-1a|miR-2115-5p,7mer-m8|miR-2116-3p,7mer-1a|miR-2861,7mer-m8|miR-3065-3p,7mer-m8|miR-320/4429,7mer-m8|miR-3622-3p,7mer-m8|miR-3690,7mer-m8|miR-378-3p/422,7mer-m8|miR-4325,8mer-1a|miR-4436-5p,7mer-1a|miR-4512,7mer-m8|miR-4686,7mer-m8|miR-4713-5p,7mer-m8|miR-4766-5p,7mer-m8|miR-4772-3p,7mer-m8|miR-507/557,7mer-m8|miR-53…	n/a	522
chr12_49317564_49319461_-	adipose_adult_53_year_female	4	circRNAfinder,CIRI,find_circ	8.35974	n/a	intergenic	Unknown	Unknown	miR-1273h-3p,7mer-1a|miR-210-5p,7mer-1a|miR-24-5p,8mer-1a|miR-3678-3p,7mer-1a|miR-379-5p/3529-5p,8mer-1a|miR-431-5p,8mer-1a|miR-432-5p,7mer-1a|miR-4421/5699-3p,8mer-1a|miR-4451,7mer-1a|miR-4509,7mer-m8|miR-4524b-3p,8mer-1a|miR-4536-5p,7mer-m8|miR-4650-3p,7mer-1a|miR-4749-3p,7mer-1a|miR-4774-3p,7mer-m8|miR-4804-5p,7mer-1a|miR-548m,7mer-1a|miR-5586-3p,7mer-m8|miR-6077,7mer-m8|miR-6748-3p,7mer-1a|mi…	AGO2|eIF4AIII|U2AF65	1897
chr11_103182606_103229087_+	adipose_adult_53_year_female	2	CIRI,find_circ	7.35974	DYNC2H1	exon	mRNA	+	miR-1224-5p,8mer-1a|miR-134-5p/3118,7mer-m8|miR-299-5p,7mer-1a|miR-302bd-5p,7mer-1a|miR-3180-5p,7mer-m8|miR-3689/6851-5p,8mer-1a|miR-3915,7mer-1a|miR-4254,7mer-m8|miR-4432,7mer-m8|miR-4659-3p,7mer-1a|miR-4659-3p,7mer-m8|miR-4689/6858-5p,7mer-1a|miR-4751,7mer-1a|miR-4756-3p,7mer-m8|miR-4768-3p,7mer-m8|miR-4778-3p,7mer-1a|miR-490-3p,7mer-m8|miR-5004-5p,8mer-1a|miR-5186,7mer-m8|miR-520-5p/525-5p,8me…	FMRP|PTB|AGO2|eIF4AIII|U2AF65	46481
chr1_225273411_225284941_+	adipose_adult_53_year_female	4	find_circ	8.35974	DNAH14	exon	mRNA	+	miR-190-5p,8mer-1a|miR-3160-3p,8mer-1a|miR-3185,7mer-1a|miR-3672/6864-3p,8mer-1a|miR-4463,7mer-m8|miR-4487,7mer-1a|miR-4684-3p,8mer-1a|miR-4762-3p,7mer-1a|miR-548/7161-5p,7mer-m8|miR-558,7mer-1a|miR-744-3p,7mer-1a	n/a	11530
chr8_145737774_145738154_-	adipose_adult_53_year_female	6	CIRI,find_circ	8.9447	RECQL4	exon	mRNA	-	miR-3620-3p,8mer-1a|miR-3907,8mer-1a|miR-412-5p,7mer-m8|miR-4421/5699-3p,7mer-1a|miR-4535,7mer-m8|miR-4632-3p,7mer-m8|miR-4740-3p,7mer-m8|miR-4766-5p,7mer-1a|miR-492,7mer-1a|miR-504-5p.1,7mer-m8|miR-548q,7mer-m8|miR-659-5p,7mer-1a|miR-6748-3p,7mer-1a|miR-6790-3p,7mer-m8|miR-6861-3p,8mer-1a|miR-6865-3p,7mer-1a|miR-6879-3p,7mer-m8	eIF4AIII|FMRP|IGF2BP1|IGF2BP3	380
chr1_63119395_63128801_-	adipose_adult_53_year_female	3	circRNAfinder,CIRI,find_circ	7.9447	DOCK7	exon	mRNA	-	miR-129-5p,7mer-m8|miR-132-3p/212-3p,7mer-1a|miR-16-3p/195-3p,7mer-1a|miR-199-3p/3129-5p,7mer-m8|miR-301-5p,8mer-1a|miR-3064-3p,7mer-1a|miR-3182,7mer-1a|miR-345-5p,8mer-1a|miR-3660/4526,7mer-1a|miR-3921/4653-5p,7mer-1a|miR-4256,8mer-1a|miR-4715-3p,8mer-1a|miR-4750-3p,8mer-1a|miR-4776-3p,7mer-1a|miR-500-5p,7mer-m8|miR-518-5p/519-5p/519-5p/520-5p/522-5p/523-5p/526a,7mer-m8|miR-520g-5p,8mer-1a|miR-6…	eIF4AIII|U2AF65|UPF1|AGO2	9406
chr5_77711343_77755185_+	adipose_adult_53_year_female	2	circRNAfinder,CIRI,find_circ	7.35974	SCAMP1	exon	mRNA	+	miR-1225-5p,8mer-1a|miR-1228-3p,7mer-1a|miR-1229-5p,7mer-1a|miR-1273f,7mer-1a|miR-129-5p,7mer-1a|miR-143-3p/4770/6088,8mer-1a|miR-3165,7mer-1a|miR-3174,7mer-1a|miR-323-5p/410-5p/494-5p,7mer-1a|miR-323a-3p,7mer-1a|miR-329-5p,7mer-m8|miR-3689/6851-5p,7mer-1a|miR-412-3p/6754-3p,7mer-1a|miR-4423-3p,7mer-1a|miR-4456,7mer-m8|miR-4485-5p,7mer-m8|miR-4708-5p,7mer-1a|miR-4803,7mer-m8|miR-5002-3p,7mer-1a|m…	UPF1|AGO1|PTB|eIF4AIII|AGO2|IGF2BP1|HuR	43842
chr1_94140169_94140497_-	adipose_adult_53_year_female	4	circRNAfinder,CIRI,find_circ	8.35974	BCAR3	exon	mRNA	-	miR-126-3p.2,7mer-m8|miR-221-5p/8073,7mer-1a|miR-3183/4723-3p/6769-3p,7mer-1a|miR-3184-3p,7mer-m8|miR-3190-3p,7mer-m8|miR-3615,7mer-m8|miR-374-5p/655-3p,7mer-1a|miR-3909/6852-3p,7mer-m8|miR-4795-5p,7mer-m8|miR-6079,7mer-1a|miR-6510-3p,7mer-1a|miR-6743-3p,7mer-1a|miR-676-3p,7mer-m8|miR-7111-3p,7mer-m8|miR-877-3p,7mer-m8	eIF4AIII|U2AF65|AGO2|UPF1|LIN28A	328
chr10_70915567_70917967_+	adipose_adult_53_year_female,adipose_adult_54_year_male	2,3	circRNAfinder,CIRI,find_circ	7.3597373209881,7.94469982170926,8.03819888284638	VPS26A	exon	mRNA	+	miR-1287-3p,8mer-1a|miR-130-5p,7mer-m8|miR-212-5p,7mer-1a|miR-2682-3p/6781-3p,7mer-m8|miR-299-5p,7mer-m8|miR-29a-5p,7mer-1a|miR-3124-3p,7mer-1a|miR-3180-5p,7mer-1a|miR-3189-3p,7mer-1a|miR-329-5p,7mer-1a|miR-3668,8mer-1a|miR-3671,7mer-1a|miR-380-3p,7mer-1a|miR-4272,7mer-1a|miR-4464/4748,7mer-1a|miR-4484,7mer-1a|miR-4694-5p,7mer-1a|miR-4720-3p,7mer-1a|miR-4795-3p,7mer-1a|miR-4804-3p,7mer-1a|miR-502…	eIF4AIII|HuR|UPF1	2400
chr3_67609924_67660020_-	adipose_adult_54_year_male	6	circRNAfinder,CIRI	9.0382	SUCLG2	exon	mRNA	-	miR-3689/6851-5p,7mer-1a|miR-4443,7mer-1a|miR-624-5p,7mer-1a|miR-6510-3p,8mer-1a|miR-6515-5p,7mer-1a|miR-6740-3p,7mer-m8|miR-890,7mer-m8	HuR|U2AF65|eIF4AIII	50096
chr5_170345716_170455993_+	adipose_omentum_adult_37_year_male	3	CIRI	8.00548	RANBP17	exon	mRNA	+	miR-1245-3p,8mer-1a|miR-1324,7mer-1a|miR-151-3p,8mer-1a|miR-3690,7mer-m8|miR-383-5p.1,7mer-m8|miR-3942-3p,7mer-m8|miR-4292/6791-5p,7mer-1a|miR-4308,7mer-1a|miR-4308,7mer-m8|miR-433-3p,8mer-1a|miR-4463,7mer-1a|miR-4499,7mer-1a|miR-4535,7mer-m8|miR-4679,7mer-m8|miR-4760-3p,7mer-m8|miR-492,7mer-1a|miR-504-5p.1,7mer-m8|miR-548c-3p,7mer-m8|miR-619-3p,8mer-1a|miR-659-5p,8mer-1a|miR-6732-3p,7mer-m8|miR-…	U2AF65|TIA1|eIF4AIII	110277
chr17_58342772_58346918_-	adipose_omentum_adult_37_year_male	3	CIRI,find_circ	8.00548	USP32	exon	mRNA	-	miR-1208,7mer-m8|miR-141-5p,7mer-m8|miR-4318,8mer-1a|miR-4693-5p,7mer-m8|miR-4694-5p,7mer-1a|miR-5003-3p,7mer-1a|miR-5682,7mer-1a|miR-585-5p,7mer-1a|miR-606,7mer-m8|miR-6758-5p/6856-5p,7mer-1a|miR-7-3p,7mer-m8|miR-892a,7mer-1a	U2AF65|eIF4AIII|FMRP|AGO2	4146
chr8_38975604_39018484_+	adipose_omentum_adult_37_year_male	2	circRNAfinder,CIRI,find_circ	7.42052	ADAM32	exon	mRNA	+	miR-1290,8mer-1a|miR-1299,7mer-m8|miR-183-3p,7mer-m8|miR-2355-3p,7mer-1a|miR-3137,7mer-1a|miR-3145-3p,7mer-m8|miR-3191-5p,8mer-1a|miR-326/330-5p,7mer-1a|miR-338-5p,7mer-m8|miR-3912-5p,7mer-1a|miR-4646-3p,7mer-1a|miR-4768-5p/6833-3p,7mer-1a|miR-4777-5p,8mer-1a|miR-5004-3p,8mer-1a|miR-518-5p,8mer-1a|miR-518-5p/519-5p/519-5p/520-5p/522-5p/523-5p/526a,7mer-1a|miR-548aa/548ap-3p/548t-3p,7mer-m8|miR-56…	U2AF65	42880
[truncated: 509 more rows]

## Sheet: C_TSCD_Fetal
ID	Sample_ID	Junction	Algorithm	BS reads	Symbol	CircRNA Type	Region	Strand	MRE	RBP	Genomic
[truncated: 508 more rows]

## Sheet: D_Circ2Disease
ID	CircRNA name	Synonyms	Chromosome	Start	End	Strand	Genome version	Gene Symbol	Sequence	Type	Disease name	Methods	Sample	Location	Expression pattern	miRNA validate	miRNA target validate	RBP validated	RBP Target Validated	Functional Description	PubMed ID	Year	Journal	Title	Note
[truncated: 84 more rows]

## Sheet: E_CircFunBase
ID	circRNA Function	Gene	Gene Description	PMID
[truncated: 339 more rows]

## Sheet: F_ExoRBase
ID	exo_circ_ID	N1	N2	N3	N4	N5	N6	N7	N8	N9	N10	N11	N12	N13	N14	N15	N16	N17	N18	N19	N20	N21	N22	N23	N24	N25	N26	N27	N28	N29	N30	N31	N32	CHD1	CHD2	CHD3	CHD4	CHD5	CHD6	CRC1	CRC2	CRC3	CRC4	CRC5	CRC6	CRC7	CRC8	CRC9	CRC10
[truncated: 24 more rows]
[truncated: 42 more columns]

[truncated: 2 more sheets: G_CSCD v2, H_circRNAs_annotated_to_CRC]
