# Supplementary material for: Docker4Circ: A Framework for the Reproducible Characterization of circRNAs from RNA-Seq Data
Source: Int J Mol Sci. 2019 Dec 31;21(1):293. doi: 10.3390/ijms21010293 (PMC6982331; doi:10.3390/ijms21010293)
Supplement: Supplementary file 1 [file ijms-21-00293-s001.zip › Supplementary_Table_7_Differentially_Expressed_circRNAs_cell_lines.xlsx]

## Sheet: NCM460_vs_SW480
ID	baseMean	log2FoldChange	lfcSE	stat	pvalue	padj	DE in Jiang et al., 2018 (Y=yes, N=no)
chr3_98568305_98600611	394.773	5.38438	0.205935	26.1461	1.0926e-150	7.73892e-147	Y
chr5_21491430_21497305	296.55	-3.19937	0.148034	-21.6124	1.3721e-103	4.85929e-100	Y
chr11_33307959_33309057	1567.75	1.8575	0.0883163	21.0323	3.32113e-98	7.8412e-95	Y
chr7_42187825_42188067	319.602	4.22412	0.204807	20.6249	1.64201e-94	2.90759e-91	Y
chr7_99621042_99621930	362.587	2.59804	0.129332	20.0881	9.37532e-90	1.32811e-86	Y
chr20_62407031_62422143	528.692	4.25648	0.215151	19.7836	4.11847e-87	4.86185e-84	Y
chr5_32135678_32143986	428.692	-2.39534	0.127851	-18.7354	2.54748e-78	2.57769e-75	Y
chr7_716866_751164	955.694	2.52498	0.142943	17.6642	7.90623e-70	6.99998e-67	Y
chr17_79660684_79661883	221.742	3.84212	0.219045	17.5403	7.05704e-69	5.55389e-66	Y
chr12_28458582_28460682	525.975	-2.35231	0.14272	-16.482	4.9427e-61	3.50091e-58	Y
chr5_619105_620376	341.009	-3.76178	0.231937	-16.219	3.70235e-59	2.38398e-56	Y
chr5_65284463_65290692	705.855	-2.28035	0.14703	-15.5093	2.99912e-54	1.77023e-51	Y
chr2_135010666_135012215	166.971	3.9165	0.25527	15.3426	3.97205e-53	2.16416e-50	Y
chr10_32197100_32199491	1204.31	2.22087	0.145772	15.2352	2.06383e-52	1.04415e-49	Y
chr2_72945232_72960247	765.624	-1.53947	0.102631	-15	7.33752e-51	3.46478e-48	Y
chr11_66407171_66407594	862.219	-1.86824	0.129811	-14.392	5.81218e-47	2.57298e-44	Y
chr5_1488506_1501718	108.781	-3.66918	0.257516	-14.2484	4.58976e-46	1.91231e-43	Y
chr1_52959283_52975384	392.207	-1.79307	0.134989	-13.2831	2.90079e-40	1.14146e-37	Y
chr1_247320302_247323115	381.028	-2.58399	0.203794	-12.6794	7.6904e-37	2.8669e-34	Y
chr20_62421174_62422143	170.789	3.88999	0.309604	12.5644	3.31354e-36	1.17349e-33	Y
chr7_158552177_158557544	336.807	1.73401	0.140504	12.3414	5.41941e-35	1.82789e-32	Y
chr22_46085592_46114373	414.734	-1.99161	0.161471	-12.3342	5.92991e-35	1.90916e-32	Y
chr3_196831774_196846401	1184.34	1.25946	0.103071	12.2193	2.45297e-34	7.55409e-32	Y
chr7_3658712_3681737	93.5065	3.10885	0.256598	12.1157	8.72679e-34	2.57549e-31	Y
chr18_9931807_9937063	479.83	-1.42688	0.118804	-12.0104	3.13233e-33	8.87453e-31	Y
chr8_141874411_141900868	239.918	-2.10671	0.175469	-12.0062	3.29841e-33	8.98563e-31	Y
chr8_141889570_141900868	137.406	-2.46775	0.207169	-11.9118	1.02713e-32	2.6945e-30	Y
chr14_99924616_99932150	976.478	-1.0495	0.0884765	-11.8619	1.86674e-32	4.72219e-30	Y
chr5_38991051_39003724	138.932	-3.53713	0.299652	-11.8041	3.716e-32	9.07601e-30	Y
chr15_89656956_89659752	470.15	1.79838	0.155037	11.5997	4.13683e-31	9.76705e-29	Y
chr12_51173923_51203372	155.674	-2.47389	0.220105	-11.2396	2.60468e-29	5.95126e-27	Y
chr8_141856359_141900868	270.451	-1.98896	0.177146	-11.2278	2.97845e-29	6.59261e-27	Y
chr13_47297356_47308133	100.527	4.11029	0.366795	11.2059	3.81261e-29	8.18324e-27	Y
chr17_57808782_57816308	329.789	1.67718	0.15012	11.1723	5.57152e-29	1.16068e-26	Y
chr4_186168448_186188309	341.741	2.20865	0.201989	10.9345	7.88172e-28	1.59504e-25	Y
chr5_137320946_137324004	1103.72	-0.869474	0.079672	-10.9132	9.97185e-28	1.96196e-25	N
chr7_1937836_1976533	179.672	1.98538	0.184429	10.765	5.03665e-27	9.64178e-25	Y
chr5_65284463_65310553	108.849	-3.07819	0.286722	-10.7358	6.91063e-27	1.28811e-24	Y
chr8_131370263_131374017	185.769	2.12013	0.198303	10.6914	1.1169e-26	2.02845e-24	Y
chr3_196817783_196846401	142.358	2.89487	0.271105	10.6781	1.28946e-26	2.28331e-24	Y
chr22_46085592_46098727	200.913	-2.38924	0.227093	-10.5209	6.91743e-26	1.19503e-23	Y
chr10_93185038_93221941	89.4885	-2.62634	0.249867	-10.5109	7.6918e-26	1.29717e-23	Y
chr5_6737623_6746540	127.684	-2.66439	0.253956	-10.4915	9.44751e-26	1.5562e-23	Y
chr4_88116476_88116842	226.16	-2.48603	0.238034	-10.444	1.56096e-25	2.51278e-23	Y
chr1_247302018_247323115	146.9	-2.84445	0.272646	-10.4328	1.75681e-25	2.76522e-23	Y
chr5_40728447_40730445	95.1242	-2.84876	0.275149	-10.3535	4.03389e-25	6.21132e-23	Y
chr11_128993341_129034322	231.578	1.84332	0.178282	10.3394	4.67636e-25	7.04738e-23	Y
chr3_4452549_4461830	93.2308	-2.67218	0.260347	-10.2639	1.02496e-24	1.51246e-22	Y
chr5_72151601_72161556	96.1254	-3.87542	0.380023	-10.1979	2.02665e-24	2.92954e-22	Y
chr1_44773982_44785416	172.01	-2.18496	0.215239	-10.1513	3.26991e-24	4.63215e-22	Y
chr10_7318854_7327916	192.648	-11.9119	1.19014	-10.0088	1.39366e-23	1.93555e-21	Y
chr7_22330794_22357656	157.962	11.6086	1.20348	9.64584	5.11916e-22	6.97289e-20	Y
chr8_74585342_74601048	325.615	-1.21917	0.126839	-9.61198	7.11703e-22	9.5113e-20	Y
chr5_21491430_21495291	148.021	-2.08839	0.218361	-9.56394	1.13354e-21	1.48683e-19	Y
chr4_7870349_7873807	150.394	-2.17557	0.227948	-9.54416	1.3722e-21	1.76715e-19	Y
chr7_73770740_73771807	106.968	4.08052	0.428224	9.52892	1.5893e-21	2.01018e-19	Y
chr9_137582758_137593179	130.747	-11.3524	1.19413	-9.5068	1.96609e-21	2.44312e-19	Y
chr11_70505933_70507783	109.127	5.62676	0.602109	9.34509	9.18125e-21	1.12122e-18	Y
chr22_28692186_28693840	112.39	-11.1344	1.1965	-9.30583	1.32953e-20	1.59611e-18	Y
chr1_23356962_23377013	311.789	-1.59561	0.171577	-9.29968	1.40874e-20	1.66301e-18	Y
chr3_138289160_138291774	148.404	11.0378	1.19217	9.25854	2.07241e-20	2.40638e-18	Y
chr21_35475134_35497780	89.3338	3.35092	0.363086	9.22902	2.73118e-20	3.12015e-18	Y
chr2_58449077_58459247	511.176	-1.08741	0.11863	-9.16638	4.89193e-20	5.49992e-18	Y
chr4_4650704_4651269	100.468	-2.22026	0.247099	-8.98529	2.58041e-19	2.85579e-17	Y
chr1_92798948_92846430	273.573	-1.59192	0.179019	-8.89251	5.97429e-19	6.51014e-17	Y
chr12_28378728_28412375	82.491	-10.6881	1.20493	-8.87033	7.29273e-19	7.82643e-17	Y
chr1_65830318_65831879	394.679	-1.10349	0.124453	-8.86673	7.53286e-19	7.96347e-17	Y
chr15_56686363_56687032	80.3922	-2.34702	0.265291	-8.84699	8.99145e-19	9.36565e-17	Y
chr11_128993341_128994789	102.93	3.23182	0.365678	8.83789	9.75406e-19	1.00128e-16	Y
chr12_111990084_111993723	568.814	-1.35708	0.154639	-8.77579	1.69711e-18	1.71724e-16	Y
chr8_15508206_15531345	72.9248	-10.5104	1.20808	-8.70007	3.31677e-18	3.30883e-16	Y
chr11_106849345_106856857	71.1499	-10.4746	1.20631	-8.68321	3.84747e-18	3.78495e-16	Y
chr2_240929491_240946787	358.159	-1.16034	0.134029	-8.65738	4.82724e-18	4.68375e-16	Y
chr20_52773708_52788209	70.564	10.4465	1.2069	8.65566	4.90087e-18	4.69093e-16	Y
chr12_46633462_46648719	104.415	-2.45103	0.285075	-8.59786	8.12142e-18	7.66987e-16	Y
chr6_160819011_160831878	113.472	-10.3386	1.2045	-8.58334	9.2155e-18	8.58861e-16	Y
chr1_247318868_247323115	1185.94	-0.904768	0.105719	-8.55825	1.14597e-17	1.04063e-15	N
chr5_176370336_176378578	89.7781	10.2798	1.20102	8.55926	1.13596e-17	1.04063e-15	Y
chr5_38523521_38530768	69.4821	-10.4402	1.22526	-8.52077	1.58492e-17	1.42101e-15	Y
chr17_57842332_57851246	202.271	-2.91752	0.342687	-8.51367	1.68509e-17	1.49193e-15	Y
chr13_26911704_26928017	109.558	1.94486	0.228865	8.49787	1.93104e-17	1.68859e-15	Y
chr3_196812451_196846401	108.914	2.97857	0.352069	8.46018	2.66958e-17	2.30593e-15	Y
chr5_170305101_170323119	198.865	-1.62979	0.193849	-8.40752	4.18754e-17	3.57354e-15	Y
chr7_128281257_128289036	69.1197	10.1021	1.20596	8.37678	5.43935e-17	4.58654e-15	Y
chr2_9419446_9437574	65.6227	2.39096	0.286168	8.35509	6.53814e-17	5.4482e-15	Y
chr20_30954187_30956926	1145.46	-1.04434	0.125735	-8.30588	9.90846e-17	8.16065e-15	Y
chr11_128932175_128936763	99.3728	2.31503	0.279012	8.29724	1.06555e-16	8.67508e-15	Y
chr7_22347958_22357656	54.5676	10.0754	1.2212	8.25043	1.57828e-16	1.27033e-14	Y
chr2_171538905_171539569	197.863	9.89111	1.20103	8.23552	1.78781e-16	1.42281e-14	Y
chr1_91382197_91383711	184.783	-2.385	0.291428	-8.18382	2.74977e-16	2.16407e-14	Y
chr17_80992911_81006661	58.2722	-9.9197	1.21854	-8.14062	3.93247e-16	3.06084e-14	Y
chr10_7285520_7327916	48.882	-9.93322	1.22326	-8.12031	4.64982e-16	3.57985e-14	Y
chr3_98600384_98611450	64.2791	6.70151	0.829252	8.08139	6.40303e-16	4.87663e-14	Y
chr3_196807922_196846401	100.048	2.78735	0.3459	8.05826	7.73909e-16	5.83149e-14	Y
chr3_68040704_68055887	46.9859	-9.87628	1.22752	-8.04568	8.57653e-16	6.39448e-14	Y
chr7_22306583_22357656	46.5623	9.84691	1.22646	8.0287	9.85123e-16	7.26836e-14	Y
chr11_128963516_129034322	108.698	1.76648	0.220081	8.02649	1.00301e-15	7.32406e-14	Y
chr8_106431372_106456609	46.8865	9.85733	1.23008	8.01358	1.11417e-15	8.05269e-14	Y
chr5_142779221_142780417	49.2789	-9.94444	1.24243	-8.00404	1.20398e-15	8.61396e-14	Y
chr12_28458582_28544344	72.0827	-3.56942	0.447144	-7.98271	1.43157e-15	1.01398e-13	Y
chr1_247322308_247323115	96.1726	-1.87291	0.235026	-7.96894	1.60046e-15	1.12238e-13	Y
chr1_19244856_19246267	64.6699	9.90965	1.24657	7.94951	1.87252e-15	1.3003e-13	Y
chr3_5212188_5216099	71.6529	-2.61959	0.330152	-7.9345	2.11348e-15	1.45338e-13	Y
chr6_57372288_57398317	90.7067	-2.36994	0.299115	-7.92317	2.31526e-15	1.57682e-13	NA
chr17_62817885_62818511	81.1107	3.15555	0.400073	7.88743	3.08467e-15	2.08083e-13	Y
chr22_25771780_25777545	238.947	-2.08232	0.264204	-7.88147	3.23562e-15	2.16207e-13	Y
chr2_148730308_148733544	134.836	-1.92415	0.244471	-7.87067	3.52736e-15	2.3311e-13	Y
chr5_39002637_39021238	41.4467	-5.49329	0.698028	-7.86972	3.55442e-15	2.3311e-13	Y
chr18_12999420_13019205	88.1135	9.48133	1.20642	7.85909	3.86934e-15	2.51436e-13	Y
chr8_128902835_128903244	1172.62	1.04195	0.133287	7.81735	5.39474e-15	3.47372e-13	Y
chr8_131164982_131181313	42.0141	3.06615	0.396674	7.72964	1.07853e-14	6.88216e-13	Y
chr9_33953283_33963789	817.639	0.88213	0.114282	7.7189	1.17339e-14	7.42064e-13	N
chr10_94653106_94659401	159.025	-1.69783	0.221118	-7.67836	1.61139e-14	1.01004e-12	Y
chr14_71880665_71996087	141.739	-1.95329	0.254545	-7.67365	1.67175e-14	1.03868e-12	Y
chr9_98740343_98766983	207.941	-2.18902	0.285318	-7.67221	1.69059e-14	1.04126e-12	Y
chr2_143642918_143685310	39.0383	-9.60855	1.25472	-7.65791	1.88984e-14	1.15394e-12	Y
chr11_65661485_65664477	58.6993	3.05612	0.400085	7.63867	2.19485e-14	1.32873e-12	Y
chr13_33306238_33309467	136.977	-2.22127	0.292404	-7.5966	3.04017e-14	1.82488e-12	Y
chr8_99718695_99719539	624.41	-1.60316	0.211991	-7.56239	3.95719e-14	2.35536e-12	Y
chr15_80412670_80415142	353.095	-1.42101	0.188056	-7.55632	4.14647e-14	2.44745e-12	Y
chr2_53628798_53642744	36.7203	-9.52063	1.26211	-7.5434	4.57861e-14	2.68019e-12	Y
chr15_100821434_100871259	42.0822	9.62113	1.27843	7.52573	5.2428e-14	3.04383e-12	Y
chr5_34179118_34182972	113.156	5.90127	0.78564	7.51142	5.84916e-14	3.36826e-12	Y
chr6_34574332_34574681	257.119	-1.69846	0.226254	-7.50689	6.0547e-14	3.4585e-12	Y
chr6_161443042_161455481	162.743	-2.11528	0.282646	-7.48386	7.2171e-14	4.0895e-12	Y
chr7_42187825_42262894	34.1419	9.39994	1.26271	7.44423	9.75096e-14	5.48143e-12	Y
chr5_72157635_72161556	57.71	-2.6327	0.354488	-7.42677	1.11279e-13	6.20619e-12	Y
chr11_119002245_119003929	42.8699	3.60982	0.487492	7.40488	1.31265e-13	7.26367e-12	Y
chr17_982570_1003975	63.528	3.14673	0.425335	7.39824	1.38002e-13	7.57727e-12	Y
chr9_74817487_74828907	33.401	-9.384	1.27504	-7.35979	1.84202e-13	1.00362e-11	Y
chr15_51240217_51250991	33.5294	-5.64652	0.770781	-7.32571	2.37631e-13	1.28484e-11	Y
chr4_9642695_9643074	32.2682	9.31752	1.27328	7.31775	2.52163e-13	1.35308e-11	Y
chr9_114148657_114154104	358.802	1.16363	0.159524	7.29436	3.00072e-13	1.59805e-11	Y
chr5_10213603_10224173	152.344	-6.24672	0.860131	-7.26252	3.7994e-13	2.0083e-11	Y
chr15_100794341_100871259	32.6381	9.33429	1.28898	7.24158	4.43478e-13	2.32678e-11	Y
chr9_74825603_74834422	30.7592	-9.24329	1.2776	-7.2349	4.65882e-13	2.42635e-11	Y
chr16_89484692_89488713	83.2822	-2.31328	0.321181	-7.20244	5.91462e-13	3.0579e-11	Y
chr14_84112888_84132553	32.3213	-9.33651	1.30387	-7.16061	8.03164e-13	4.12233e-11	Y
chr11_70200407_70202360	51.0982	2.48482	0.349176	7.11624	1.10909e-12	5.59314e-11	Y
chr16_19234367_19236160	29.7556	-9.21724	1.29534	-7.11571	1.11342e-12	5.59314e-11	Y
chr5_43675613_43704502	151.071	-1.51985	0.213552	-7.11699	1.10313e-12	5.59314e-11	Y
chr3_60751257_60752831	28.3321	9.13075	1.28696	7.0948	1.29539e-12	6.46146e-11	Y
chr18_8076453_8088849	28.2758	-9.14349	1.2959	-7.05569	1.71744e-12	8.50674e-11	Y
chr3_80680382_80683122	34.1758	9.03269	1.28075	7.05268	1.75505e-12	8.63265e-11	Y
chr21_37775056_37783902	60.3264	2.74008	0.388651	7.05023	1.78626e-12	8.72557e-11	Y
chr7_716866_720363	48.5882	2.99807	0.425575	7.04476	1.85786e-12	9.01314e-11	Y
chr16_16101673_16110478	48.156	-2.26762	0.322979	-7.02095	2.20367e-12	1.06181e-10	Y
chr18_8113484_8143777	27.0963	-9.08199	1.29782	-6.99789	2.59846e-12	1.24358e-10	Y
chr7_810108_814799	52.0635	2.90239	0.414854	6.99617	2.63049e-12	1.25045e-10	Y
chr2_206305094_206305396	58.7723	-2.65526	0.380172	-6.98437	2.86134e-12	1.35113e-10	Y
chr17_77642782_77647218	27.3263	-9.09449	1.3054	-6.96682	3.24189e-12	1.52068e-10	Y
chr8_52773405_52773806	131.84	-1.28048	0.183924	-6.96199	3.35498e-12	1.56338e-10	Y
chr3_98600384_98609300	41.8318	5.54045	0.796266	6.95805	3.45025e-12	1.59727e-10	Y
chr12_39223181_39268313	26.0537	-9.02548	1.29853	-6.95053	3.63914e-12	1.67377e-10	Y
chr8_141749117_141762415	108.757	-2.08361	0.301126	-6.91942	4.53495e-12	2.07233e-10	Y
chr13_24796957_24798720	29.0118	5.53918	0.80298	6.89828	5.2635e-12	2.38983e-10	Y
chr7_618893_751164	43.5463	4.46954	0.649252	6.88413	5.81419e-12	2.62305e-10	Y
chr19_17387304_17387718	89.4657	-1.91948	0.27925	-6.87368	6.25661e-12	2.80478e-10	Y
chr1_41474466_41475261	29.9048	-8.52573	1.24263	-6.86106	6.83516e-12	3.04487e-10	Y
chr8_141357856_141370292	141.518	2.38472	0.34808	6.85105	7.33074e-12	3.24523e-10	Y
chr5_127782174_127866386	25.2819	-8.98196	1.31122	-6.8501	7.37995e-12	3.24672e-10	Y
chr20_35236118_35238133	38.2069	-2.69712	0.394142	-6.84303	7.75367e-12	3.39008e-10	Y
chr10_86177527_86185649	247.515	-1.01552	0.148985	-6.81624	9.34522e-12	4.06087e-10	Y
chr22_28692186_28702631	25.6537	-9.00341	1.32601	-6.78986	1.12241e-11	4.84758e-10	Y
chr14_66028055_66028484	390.672	1.019	0.150399	6.77532	1.24127e-11	5.29999e-10	N
chr10_12442015_12445368	24.8659	-8.95793	1.32216	-6.77523	1.24213e-11	5.29999e-10	Y
chr2_172782047_172809519	44.5229	-2.25992	0.334266	-6.76084	1.37191e-11	5.8187e-10	Y
chr6_84108086_84117620	241.111	-1.13288	0.167623	-6.75849	1.39433e-11	5.8786e-10	Y
chr11_68153784_68157520	56.0085	4.54185	0.672115	6.75754	1.4035e-11	5.88224e-10	Y
chr22_46125305_46136418	258.963	-1.89407	0.282832	-6.6968	2.13037e-11	8.8761e-10	Y
chr5_145197457_145205763	34.6552	8.84238	1.32094	6.69399	2.17159e-11	8.99496e-10	Y
chr6_107824861_107827631	33.561	-8.61718	1.28793	-6.69074	2.22049e-11	9.14405e-10	Y
chr7_80418622_80440017	23.6532	-8.88561	1.33088	-6.6765	2.44709e-11	1.00189e-09	Y
chr1_225195115_225284941	28.561	-8.62314	1.29372	-6.66539	2.6397e-11	1.07454e-09	Y
chrX_53672263_53681075	654.951	-0.733889	0.110899	-6.61766	3.64927e-11	1.46033e-09	N
chr11_62406455_62407203	156.614	1.85004	0.27956	6.61769	3.6485e-11	1.46033e-09	Y
chr22_46096162_46136418	110.752	-1.79501	0.271211	-6.61849	3.62877e-11	1.46033e-09	Y
chr22_28910745_28915308	22.407	-8.80765	1.33127	-6.616	3.69052e-11	1.46854e-09	Y
chr4_39915231_39927553	56.7304	-3.62449	0.548955	-6.60253	4.0419e-11	1.59937e-09	Y
chr17_28934570_28937960	77.2317	-1.73299	0.264868	-6.54283	6.03664e-11	2.37542e-09	Y
chr9_4286038_4286523	60.2433	3.12075	0.478331	6.52425	6.83429e-11	2.67443e-09	Y
chr1_225273412_225284941	39.2222	-5.3032	0.816445	-6.49548	8.27668e-11	3.22108e-09	Y
chr21_37619815_37620866	51.7154	2.30939	0.356314	6.48133	9.09161e-11	3.5189e-09	Y
chr21_16386665_16415895	487.411	-1.1581	0.17884	-6.47562	9.44227e-11	3.63476e-09	Y
chr10_126176991_126186697	33.33	-5.88867	0.91041	-6.46815	9.92098e-11	3.7984e-09	Y
chr4_41496553_41553412	21.3034	-8.7348	1.35451	-6.44866	1.12841e-10	4.29707e-09	Y
chr21_46538479_46548488	24.3643	-8.82971	1.36942	-6.44775	1.13522e-10	4.29986e-09	Y
chr5_43675613_43677908	163.343	-1.64104	0.254741	-6.442	1.17911e-10	4.44237e-09	Y
chr3_57875768_57882659	186.368	1.40385	0.218357	6.42914	1.28329e-10	4.80927e-09	Y
chr13_101936284_101944717	21.7137	-8.76245	1.36384	-6.42485	1.31998e-10	4.92076e-09	Y
chr10_69902697_69909868	20.5578	-8.68369	1.35217	-6.42205	1.34456e-10	4.92487e-09	Y
chr3_52446827_52448603	37.335	2.89417	0.450736	6.42098	1.354e-10	4.92487e-09	Y
chr4_1221987_1235307	99.0234	-1.8772	0.292399	-6.41999	1.36281e-10	4.92487e-09	Y
chr5_60768508_60768864	125.356	-1.56447	0.243661	-6.42068	1.3567e-10	4.92487e-09	Y
chr6_155095123_155116273	70.6687	2.96076	0.46101	6.42234	1.34193e-10	4.92487e-09	Y
chr7_27668990_27672064	326.12	-1.4116	0.219764	-6.42324	1.33408e-10	4.92487e-09	Y
chr6_117019867_117026323	103.638	-2.01694	0.31429	-6.41744	1.38584e-10	4.98268e-09	Y
chr19_10602253_10602938	25.0785	8.41915	1.31379	6.40828	1.4717e-10	5.26466e-09	Y
chr11_46515158_46534363	134.173	-1.68624	0.263227	-6.40602	1.49371e-10	5.31657e-09	Y
chr10_104018686_104103939	20.3317	-8.6676	1.3553	-6.39532	1.60215e-10	5.67402e-09	Y
chr10_96005703_96006378	21.0361	-8.71657	1.36313	-6.39451	1.61058e-10	5.6755e-09	Y
chr14_61482622_61512885	22.8262	-8.83415	1.38174	-6.39352	1.62115e-10	5.68445e-09	Y
chr11_130130751_130131824	182.056	1.04036	0.163436	6.36556	1.94577e-10	6.7891e-09	N
chrX_21869627_21871621	19.9999	-8.64376	1.36077	-6.35213	2.12361e-10	7.37329e-09	Y
chr17_11998892_12016677	21.2092	-8.72821	1.37433	-6.35089	2.14066e-10	7.39624e-09	Y
chr10_486811_532470	19.8952	-8.63622	1.36224	-6.33974	2.30153e-10	7.91348e-09	Y
chr17_59853762_59857762	135.272	-1.16679	0.18447	-6.32512	2.53042e-10	8.65845e-09	Y
chr12_11181000_11199787	91.6158	-3.0339	0.479938	-6.32144	2.59141e-10	8.82451e-09	Y
chr5_118264232_118280344	57.2218	-2.13015	0.337692	-6.30796	2.82731e-10	9.58174e-09	Y
chr19_34921481_34925873	154.689	1.14057	0.180989	6.30186	2.94086e-10	9.9191e-09	Y
chr2_43725972_43755127	58.0541	2.53299	0.404102	6.26819	3.65265e-10	1.22615e-08	Y
chr12_104682709_104683320	19.1479	-8.58103	1.36942	-6.26617	3.70033e-10	1.23629e-08	Y
chr8_48320423_48353104	105.53	-1.65949	0.265221	-6.25702	3.92409e-10	1.3049e-08	Y
chr8_126692177_126738132	19.3207	8.57747	1.3714	6.25452	3.98737e-10	1.31975e-08	Y
chr2_28974904_29022165	23.0599	-8.8008	1.41305	-6.22825	4.71682e-10	1.55392e-08	Y
chr5_95091100_95099324	356.582	-0.846651	0.135974	-6.22658	4.76712e-10	1.56322e-08	N
chr13_96636058_96651561	82.2646	-2.05446	0.330194	-6.22199	4.90896e-10	1.60231e-08	Y
chr12_19626182_19653155	76.1871	-3.13722	0.504913	-6.21338	5.18558e-10	1.68484e-08	Y
chr7_155295716_155301792	38.6108	7.70206	1.25042	6.15959	7.29315e-10	2.35879e-08	Y
chr6_17507400_17514185	25.859	-8.81191	1.43265	-6.15077	7.71091e-10	2.48256e-08	Y
chr5_151169884_151170623	86.6246	1.7146	0.279401	6.13671	8.42456e-10	2.70005e-08	Y
chr15_100739523_100871259	18.3188	8.50144	1.39275	6.10405	1.03411e-09	3.29937e-08	Y
chr10_74501480_74502031	18.499	-8.53106	1.39958	-6.09545	1.0913e-09	3.46624e-08	Y
chr9_14639894_14680160	29.4571	8.31574	1.36748	6.08105	1.19398e-09	3.77544e-08	Y
chr14_50130033_50141145	142.159	-1.33383	0.219541	-6.07553	1.23577e-09	3.89022e-08	Y
chr12_936208_939326	98.9856	-1.58019	0.260503	-6.0659	1.31221e-09	4.11255e-08	Y
chr19_11258494_11258789	36.2447	4.7904	0.790501	6.05996	1.36157e-09	4.24846e-08	Y
chr5_124036707_124036962	174.013	11.6822	1.9304	6.05169	1.4333e-09	4.45266e-08	Y
chr19_37690302_37698156	17.605	-8.45979	1.39923	-6.04604	1.48452e-09	4.59164e-08	Y
chr5_179688684_179707608	126.934	-1.75953	0.291931	-6.02722	1.66802e-09	5.13677e-08	Y
chr4_79186179_79188586	31.6407	7.9392	1.31745	6.02619	1.67873e-09	5.14737e-08	Y
chr11_117023157_117034608	120.838	1.59335	0.265291	6.00604	1.90106e-09	5.80395e-08	Y
chr20_21346059_21349228	103.036	1.65793	0.276122	6.00433	1.9212e-09	5.84029e-08	Y
chr10_89685270_89712016	17.1601	-8.42282	1.4074	-5.98468	2.1682e-09	6.56296e-08	Y
chr2_136620177_136622733	114.576	1.21302	0.202934	5.97741	2.26719e-09	6.83341e-08	Y
chr12_39223181_39242464	17.0851	-8.41672	1.41719	-5.93901	2.86745e-09	8.60598e-08	Y
chr12_29812813_29814312	17.3032	-8.43518	1.42292	-5.92807	3.06507e-09	9.16029e-08	Y
chr8_142195238_142200516	17.061	8.39802	1.41805	5.92223	3.17612e-09	9.4523e-08	Y
chr1_167935867_167944253	139.275	-1.63629	0.276336	-5.92139	3.19223e-09	9.4605e-08	Y
chr14_71880665_71933964	48.347	-2.61876	0.442314	-5.92059	3.20787e-09	9.46724e-08	Y
chr15_69728477_69729061	97.0246	1.37636	0.232802	5.91214	3.377e-09	9.88399e-08	Y
chr3_171830242_171944737	40.6977	-2.06208	0.348783	-5.91221	3.37543e-09	9.88399e-08	Y
chr5_127854966_127866386	16.6857	-8.38242	1.42415	-5.88591	3.95861e-09	1.15386e-07	Y
chr15_59470592_59480415	16.6102	-7.9041	1.34511	-5.87619	4.19809e-09	1.21865e-07	Y
chr22_48081949_48082955	16.9064	-8.40128	1.43092	-5.87126	4.32485e-09	1.25032e-07	Y
chr11_86778736_86802437	87.7351	-1.40328	0.239309	-5.8639	4.52127e-09	1.29656e-07	Y
chr5_38991051_39021238	107.387	-2.26303	0.385926	-5.86389	4.5214e-09	1.29656e-07	Y
chr12_47497896_47501947	34.8733	-7.60816	1.29879	-5.85788	4.68823e-09	1.33898e-07	Y
chr12_116668238_116675510	60.8571	2.18934	0.374118	5.85201	4.85673e-09	1.38154e-07	Y
chr2_85595809_85598685	33.7886	2.52186	0.43129	5.84725	4.99765e-09	1.41594e-07	Y
chr4_146767108_146770713	57.8928	2.14573	0.36767	5.83603	5.34583e-09	1.50855e-07	Y
chr12_29904599_29911710	17.213	-8.4276	1.44563	-5.8297	5.55256e-09	1.56066e-07	Y
chr3_138289160_138290198	24.1354	8.65286	1.48863	5.81263	6.14978e-09	1.72169e-07	Y
chr9_96233423_96238620	392.987	-1.04349	0.179813	-5.80319	6.50633e-09	1.81434e-07	Y
chr17_81006347_81006661	23.3766	-8.60356	1.48285	-5.80202	6.55195e-09	1.81559e-07	Y
chr19_52785364_52786666	60.92	2.10762	0.363273	5.80176	6.56207e-09	1.81559e-07	Y
chr14_35331250_35331528	76.8177	-1.90216	0.327987	-5.7995	6.65123e-09	1.8331e-07	Y
chr2_135007621_135028121	19.4481	7.94888	1.37411	5.78473	7.26284e-09	1.9939e-07	Y
chr3_150834125_150845771	23.4701	8.65082	1.49744	5.77708	7.60069e-09	2.0786e-07	Y
chr4_115380370_115412085	16.055	-8.3268	1.44568	-5.75979	8.42207e-09	2.29437e-07	Y
chr12_19615444_19626289	123.632	-1.84393	0.320816	-5.74763	9.05056e-09	2.45107e-07	Y
chrX_112291554_112293180	15.7385	-8.2982	1.44384	-5.74733	9.06649e-09	2.45107e-07	Y
chr12_46622936_46648719	70.1652	-1.86916	0.325667	-5.73947	9.49738e-09	2.5557e-07	Y
chr8_100286426_100287482	86.2499	-1.96334	0.342107	-5.73896	9.52569e-09	2.5557e-07	Y
chr10_5827105_5842668	279.983	1.24141	0.216395	5.73676	9.65041e-09	2.57939e-07	Y
chr6_137015278_137019820	42.3806	-3.52965	0.616205	-5.72804	1.01595e-08	2.70525e-07	Y
chr1_63944435_63955889	16.4004	-7.68951	1.34267	-5.72702	1.0221e-08	2.71142e-07	N
chr7_618893_635941	29.0552	4.03197	0.70465	5.72194	1.05314e-08	2.78334e-07	Y
chr16_28112779_28113266	76.6267	-2.20874	0.386258	-5.7183	1.07594e-08	2.83303e-07	Y
chr7_8043538_8099878	15.7123	-8.2956	1.45133	-5.71587	1.09144e-08	2.86321e-07	Y
chr5_79974746_80057497	19.5409	-8.44459	1.48082	-5.70265	1.17962e-08	3.08313e-07	Y
chr12_48134425_48137459	16.9809	8.39111	1.47282	5.69733	1.21701e-08	3.16916e-07	Y
chr12_28408514_28412375	16.5865	-8.37385	1.47317	-5.68425	1.31385e-08	3.40584e-07	Y
chr7_77214860_77230123	111.733	1.25683	0.221127	5.68378	1.31752e-08	3.40584e-07	Y
chr12_50821545_50824353	112.658	1.08161	0.19035	5.68223	1.32947e-08	3.42422e-07	Y
chr2_191774989_191778090	20.7047	7.528	1.32509	5.68114	1.33799e-08	3.4337e-07	Y
chr3_195415404_195416309	15.3246	-8.25962	1.45414	-5.68005	1.34652e-08	3.4431e-07	Y
chr22_46096162_46114373	61.3725	-2.23225	0.393044	-5.6794	1.35167e-08	3.44384e-07	Y
chr17_8354098_8363478	15.1972	-8.24768	1.4533	-5.67512	1.38589e-08	3.51836e-07	Y
chr6_20781376_20846409	38.5985	7.07174	1.24659	5.67287	1.40425e-08	3.55226e-07	Y
chr17_38652239_38652772	16.0164	8.15009	1.4399	5.6602	1.512e-08	3.8112e-07	Y
chr7_47384353_47385954	63.7184	-2.20996	0.390583	-5.65811	1.53049e-08	3.84415e-07	Y
chr16_89484692_89493477	20.4733	-7.63801	1.35182	-5.65017	1.60286e-08	4.01168e-07	Y
chr9_114341076_114348445	15.7386	-8.29846	1.46921	-5.64825	1.6209e-08	4.04255e-07	Y
chr12_113541751_113542103	20.596	7.35156	1.30586	5.62965	1.80575e-08	4.48215e-07	Y
chr17_50850586_50882797	15.0412	-8.23271	1.46249	-5.62926	1.80982e-08	4.48215e-07	Y
chr11_102233627_102239279	46.9655	2.89846	0.515504	5.62257	1.88134e-08	4.64304e-07	Y
chr21_42609440_42629253	42.4308	4.75876	0.846755	5.62	1.90959e-08	4.6964e-07	N
chr12_120592774_120593523	667.984	0.665273	0.119047	5.58833	2.29268e-08	5.61905e-07	N
chr9_37424842_37426651	90.5904	1.34525	0.24111	5.5794	2.41355e-08	5.8949e-07	Y
chr1_247320386_247323115	23.3346	-7.27242	1.30439	-5.57533	2.47064e-08	5.993e-07	Y
chr3_138289160_138291826	235.56	-1.35425	0.242887	-5.57566	2.46587e-08	5.993e-07	Y
chr17_722679_729318	71.8716	2.13356	0.38306	5.56979	2.5505e-08	6.1656e-07	Y
chr8_131370263_131414216	31.775	2.40984	0.433456	5.55961	2.70385e-08	6.51406e-07	Y
chr3_197009550_197009716	31.0384	4.67355	0.840863	5.55805	2.72812e-08	6.55026e-07	Y
chr7_42187825_42212285	29.6983	2.9093	0.523732	5.55493	2.77715e-08	6.64547e-07	Y
chr19_43498902_43499513	15.3017	8.24162	1.48431	5.55248	2.81647e-08	6.71685e-07	Y
chr14_71867511_71884913	17.8859	-8.4198	1.51686	-5.55081	2.84355e-08	6.75868e-07	Y
chr3_53908238_53910107	46.6151	2.35648	0.424704	5.54852	2.88092e-08	6.8246e-07	Y
chr1_28601336_28605752	21.4195	-8.65818	1.56368	-5.53706	3.076e-08	7.26243e-07	Y
chr2_68717322_68742868	15.3099	7.78772	1.40701	5.53495	3.11315e-08	7.32573e-07	Y
chr10_72285679_72291210	27.0717	7.17431	1.2982	5.52633	3.26999e-08	7.66932e-07	Y
chr18_18945988_18983955	14.6055	-8.19024	1.48273	-5.52374	3.31855e-08	7.73246e-07	Y
chr3_196118684_196129890	422.478	-0.996958	0.180486	-5.52373	3.31875e-08	7.73246e-07	Y
chr1_213037067_213046160	15.1163	-7.65589	1.38726	-5.51872	3.41471e-08	7.90405e-07	Y
chr13_20279802_20283739	166.704	0.974568	0.176588	5.51887	3.41179e-08	7.90405e-07	Y
chr17_11958206_11999011	14.8315	-8.21227	1.48913	-5.51481	3.49158e-08	8.05564e-07	Y
chr2_61712903_61717911	114.948	1.1879	0.216175	5.49508	3.9053e-08	8.98093e-07	Y
chr16_88066715_88071617	14.5148	-8.18125	1.48949	-5.49266	3.95924e-08	9.04623e-07	Y
chr3_61975299_61989171	14.7397	-8.20332	1.4934	-5.49305	3.9505e-08	9.04623e-07	Y
chr3_127980971_127983624	138.09	-0.985594	0.17948	-5.49139	3.98784e-08	9.05635e-07	Y
chr7_128845044_128846428	16.0445	7.52831	1.37095	5.49133	3.98925e-08	9.05635e-07	Y
chr17_28011581_28030080	53.4606	-1.76535	0.321747	-5.48678	4.09322e-08	9.26271e-07	Y
chr1_151611364_151611595	244.78	-1.05836	0.193327	-5.47445	4.38873e-08	9.8998e-07	Y
chr2_47604153_47607108	20.7516	7.50796	1.3726	5.46988	4.50332e-08	1.0126e-06	Y
chr1_8601273_8674745	114.547	-1.23694	0.226471	-5.4618	4.71344e-08	1.0565e-06	Y
chr1_61743192_61824946	22.6975	-5.57734	1.02316	-5.45109	5.00614e-08	1.11856e-06	Y
chr9_33971649_33973235	111.822	1.35003	0.248594	5.43066	5.6146e-08	1.25057e-06	Y
chr11_1307232_1317024	36.7378	4.45206	0.820747	5.4244	5.81492e-08	1.2895e-06	Y
chr19_17212470_17213367	104.576	2.0536	0.378608	5.42407	5.82578e-08	1.2895e-06	Y
chr7_5680785_5692141	62.885	1.60629	0.296301	5.42115	5.92157e-08	1.30662e-06	Y
chr1_176132005_176153828	58.7511	-1.55281	0.286617	-5.41771	6.03677e-08	1.3279e-06	Y
chr20_47682729_47683047	35.0365	3.56957	0.659005	5.4166	6.07424e-08	1.33201e-06	Y
chr9_20819795_20823114	208.442	-1.14479	0.211622	-5.40962	6.31599e-08	1.38075e-06	Y
chr7_2393549_2400537	17.7119	8.45289	1.56609	5.39747	6.75887e-08	1.47302e-06	Y
chr16_31733947_31734674	131.447	1.18499	0.219584	5.39652	6.79454e-08	1.47625e-06	Y
chr16_15973661_15978062	84.2992	-2.0497	0.380119	-5.39225	6.95817e-08	1.50718e-06	Y
chr18_18975346_18983955	14.4867	-8.17829	1.51686	-5.3916	6.98314e-08	1.50797e-06	Y
chr13_76134889_76143643	222.203	0.977602	0.181717	5.3798	7.45686e-08	1.60538e-06	N
chr2_47606092_47607108	21.5095	7.78491	1.44778	5.37713	7.56841e-08	1.62445e-06	Y
chr10_12442720_12445368	13.9673	-8.12605	1.51208	-5.37409	7.69715e-08	1.6471e-06	Y
chr5_619105_624694	45.6941	-1.97712	0.368028	-5.3722	7.77799e-08	1.65938e-06	Y
chr8_145245687_145255444	94.8281	1.88277	0.350851	5.36628	8.03752e-08	1.7096e-06	Y
chr2_58311224_58316858	229.736	-1.06261	0.198645	-5.3493	8.82963e-08	1.87246e-06	Y
chr19_11230768_11231198	82.9596	1.5145	0.283567	5.34088	9.24942e-08	1.95563e-06	Y
chr3_3178944_3182332	43.9421	-1.96578	0.368477	-5.33487	9.56109e-08	2.01551e-06	Y
chr6_158317859_158331057	33.0077	3.46418	0.64962	5.33263	9.68017e-08	2.03456e-06	Y
chr4_7857193_7873807	13.5613	-8.08333	1.51767	-5.32615	1.00317e-07	2.10221e-06	Y
chr11_68527037_68529155	37.7158	2.69018	0.505829	5.31837	1.04703e-07	2.18765e-06	Y
chr12_96076483_96077487	13.5743	-8.08468	1.52261	-5.30974	1.09783e-07	2.28704e-06	Y
chr17_8473038_8480656	33.2189	-2.18516	0.411661	-5.30816	1.10735e-07	2.3001e-06	Y
chr1_94107860_94140497	87.6913	-1.39202	0.262406	-5.30483	1.12776e-07	2.33565e-06	Y
chr2_227771509_227779067	36.9349	6.95367	1.31347	5.29411	1.19595e-07	2.46965e-06	Y
chr14_31841016_31844174	15.0805	-8.19214	1.54793	-5.29233	1.20767e-07	2.4866e-06	Y
chrX_23748644_23751334	16.7994	-7.04056	1.33278	-5.28262	1.27349e-07	2.61454e-06	N
chr20_61291764_61292527	44.9331	9.62036	1.82638	5.26744	1.38343e-07	2.83203e-06	Y
chr19_46020921_46021352	36.5412	2.82972	0.537481	5.26479	1.40353e-07	2.86491e-06	Y
chr6_146209156_146216113	67.9464	-2.69969	0.513111	-5.26142	1.42949e-07	2.9095e-06	Y
chr21_35475134_35475818	26.0722	8.30188	1.57897	5.25779	1.45794e-07	2.95891e-06	Y
chr13_42439872_42442613	265.48	1.09688	0.209404	5.23812	1.62225e-07	3.28296e-06	Y
chr8_95676925_95677424	20.2308	6.96403	1.33115	5.23159	1.68056e-07	3.39129e-06	Y
chr19_58904343_58904854	187.697	1.69097	0.324179	5.21617	1.82665e-07	3.67561e-06	Y
chr3_149613260_149639014	101.108	1.54163	0.295854	5.21079	1.88041e-07	3.77306e-06	Y
chr3_183097085_183107567	79.2542	-1.53092	0.294014	-5.20697	1.91954e-07	3.84071e-06	Y
chr18_29691717_29693823	208.737	-1.07558	0.206744	-5.20248	1.96648e-07	3.91253e-06	Y
chr2_47600602_47601187	14.8614	7.18053	1.38013	5.20278	1.96331e-07	3.91253e-06	Y
chr10_116879949_116889297	40.849	2.31164	0.444464	5.20097	1.98254e-07	3.93342e-06	Y
chr3_127800097_127806651	15.9884	-7.25295	1.39549	-5.19742	2.02069e-07	3.99793e-06	Y
chr11_18010144_18029623	45.307	3.11968	0.600971	5.19106	2.09101e-07	4.12551e-06	Y
chr3_98600384_98600611	62.401	6.04878	1.16804	5.17858	2.23579e-07	4.39892e-06	Y
chr16_70497072_70497677	91.2303	1.5105	0.291872	5.17523	2.27633e-07	4.46627e-06	Y
chr6_57393112_57398317	78.3834	-1.83586	0.355503	-5.16413	2.41565e-07	4.72654e-06	NA
chr14_50131344_50141145	13.4146	-7.27835	1.41172	-5.15565	2.52756e-07	4.93187e-06	Y
chrX_67731691_67742759	42.5579	-2.60991	0.506485	-5.15299	2.56362e-07	4.9885e-06	Y
chrX_17491184_17495443	13.2873	-8.05363	1.56633	-5.14171	2.7225e-07	5.28314e-06	Y
chr12_28408514_28460682	52.2024	-1.89755	0.369543	-5.13486	2.8235e-07	5.46417e-06	Y
chr18_59739906_59763183	27.0228	-2.88753	0.563102	-5.1279	2.92998e-07	5.65479e-06	Y
chr3_142455221_142467302	145.261	-1.43127	0.279721	-5.11675	3.1084e-07	5.98282e-06	Y
chr16_7926082_7944397	12.3733	-7.95105	1.55583	-5.11051	3.21296e-07	6.16731e-06	Y
chr14_45705017_45706924	16.2575	-8.26297	1.61722	-5.10936	3.23253e-07	6.18811e-06	Y
chr6_87925621_87928449	303.137	0.852451	0.167143	5.10014	3.39409e-07	6.47987e-06	N
chr9_3330259_3395596	19.1513	8.13759	1.59664	5.0967	3.4563e-07	6.58091e-06	Y
chr14_80963812_80997230	114.174	-1.34854	0.265571	-5.07789	3.81653e-07	7.24732e-06	Y
chr18_33775220_33783152	13.1038	-7.30808	1.44077	-5.07236	3.92914e-07	7.4412e-06	Y
chr22_41277774_41278181	82.262	1.24665	0.246364	5.06019	4.18828e-07	7.91082e-06	Y
chr17_62587202_62602758	32.956	3.40648	0.67347	5.0581	4.23452e-07	7.97689e-06	Y
chr9_137591755_137593179	12.2846	-7.94067	1.57282	-5.04868	4.4487e-07	8.35812e-06	Y
chr18_45391430_45396935	77.2704	-1.76319	0.349414	-5.04613	4.50854e-07	8.44814e-06	Y
chr19_50902108_50902741	88.1709	1.28519	0.254804	5.04385	4.56258e-07	8.52686e-06	Y
chr2_32602656_32620661	16.5058	8.01028	1.5885	5.04268	4.59047e-07	8.55639e-06	Y
chr16_69729039_69729282	72.0739	1.72786	0.34364	5.02811	4.9535e-07	9.20883e-06	Y
chr15_85607601_85610435	82.0331	-1.59214	0.316877	-5.02446	5.04838e-07	9.36065e-06	Y
chr2_68717322_68740812	15.2741	7.68133	1.52974	5.02132	5.13185e-07	9.49057e-06	Y
chr2_75745182_75749613	23.3677	4.33601	0.864537	5.01541	5.29197e-07	9.73585e-06	Y
chr5_34175927_34182972	12.1772	-7.92804	1.58061	-5.01582	5.28077e-07	9.73585e-06	Y
chr5_76745585_76760634	164.861	-0.940842	0.187725	-5.01181	5.39197e-07	9.85872e-06	N
chr10_93902786_93940776	43.5059	-3.63042	0.724417	-5.01151	5.40051e-07	9.85872e-06	Y
chr2_37543380_37544322	43.6738	2.86602	0.571834	5.01198	5.38724e-07	9.85872e-06	Y
chr17_80914571_80923622	18.4623	-6.95626	1.38826	-5.0108	5.42056e-07	9.86987e-06	Y
chr4_148867768_148887990	81.5087	-1.55895	0.31145	-5.00547	5.57245e-07	1.01204e-05	Y
chr8_100182267_100205285	14.0975	-7.9418	1.58749	-5.00272	5.65257e-07	1.02397e-05	Y
chr5_158621724_158630664	35.1313	-4.2892	0.857524	-5.00184	5.67848e-07	1.02604e-05	Y
chr11_68115315_68115711	664.055	1.88265	0.376491	5.00051	5.71788e-07	1.03053e-05	Y
chr4_6925100_6969151	177.767	1.24189	0.248753	4.99247	5.96113e-07	1.07164e-05	Y
chr2_64083440_64085070	266.005	0.748697	0.14998	4.99197	5.97653e-07	1.07169e-05	N
chrX_106394086_106396733	13.8194	-6.89184	1.38083	-4.99108	6.00418e-07	1.07393e-05	N
chr11_9451221_9452550	491.1	-0.780485	0.15645	-4.98872	6.07797e-07	1.08439e-05	N
chr15_93540187_93541851	16.5544	-6.01451	1.20661	-4.98465	6.20741e-07	1.1047e-05	N
chr18_9775275_9815219	12.2453	-7.93617	1.59257	-4.98324	6.25276e-07	1.10998e-05	Y
chr1_23356962_23370979	18.4338	-7.96972	1.6049	-4.96588	6.83908e-07	1.21103e-05	N
chr17_62557618_62568074	27.2526	3.79351	0.765241	4.95727	7.149e-07	1.26275e-05	Y
chr11_43436140_43457884	11.6464	-7.08048	1.43049	-4.9497	7.43278e-07	1.30961e-05	Y
chr17_11958206_12016677	12.8563	-8.006	1.61925	-4.94426	7.64318e-07	1.34334e-05	Y
chr3_186509514_186510736	15.3759	6.75549	1.36703	4.94171	7.74406e-07	1.3577e-05	Y
chr17_79928252_79943483	12.204	7.9146	1.60462	4.93239	8.12276e-07	1.42058e-05	Y
chr7_98988516_98988876	35.866	3.69318	0.749862	4.92515	8.42938e-07	1.47057e-05	Y
chr3_4403723_4418073	30.3605	-2.86005	0.583426	-4.90216	9.47877e-07	1.64959e-05	Y
chr1_155646339_155649303	102.969	-1.43303	0.292665	-4.89648	9.75693e-07	1.69383e-05	Y
chr1_22404922_22413359	163.074	-1.505	0.307847	-4.8888	1.01452e-06	1.75694e-05	Y
chr5_78734833_78752841	87.4615	1.39105	0.284662	4.88668	1.02549e-06	1.77159e-05	Y
chr10_69785303_69804320	13.6506	-7.79241	1.59514	-4.8851	1.03378e-06	1.77725e-05	Y
chr5_73136305_73136585	77.8245	-1.36967	0.28037	-4.8852	1.03323e-06	1.77725e-05	Y
chr20_30954187_30959677	393.079	-0.699261	0.143169	-4.88415	1.03877e-06	1.7815e-05	N
chr1_225140372_225156576	17.2383	-6.08857	1.24736	-4.88115	1.05469e-06	1.80443e-05	Y
chr17_49118862_49133843	140.066	-1.00644	0.206255	-4.87957	1.06318e-06	1.81458e-05	Y
chr6_89554076_89563483	46.731	2.11493	0.434128	4.87168	1.10651e-06	1.88399e-05	Y
chr10_126799559_126811437	93.53	-1.51076	0.310331	-4.86821	1.12611e-06	1.91276e-05	Y
chr5_72144212_72151750	13.361	-7.83149	1.61013	-4.86388	1.15105e-06	1.95046e-05	Y
chr10_518379_532470	16.1845	-7.93544	1.63183	-4.86291	1.1567e-06	1.95535e-05	Y
chr8_80182258_80201046	93.3646	7.94781	1.63793	4.85235	1.22005e-06	2.05752e-05	Y
chr12_12397196_12397589	345.887	-0.551015	0.113594	-4.85075	1.22994e-06	2.06927e-05	N
chr13_41515057_41515506	13.4397	6.99113	1.44173	4.84913	1.24005e-06	2.08135e-05	Y
chr5_140961879_140963182	34.1407	2.40758	0.49749	4.83945	1.30202e-06	2.18019e-05	Y
chr19_49136701_49136912	30.2549	2.11309	0.437856	4.82599	1.39311e-06	2.32721e-05	Y
chr11_13435077_13443385	93.8883	1.74034	0.36077	4.82395	1.40741e-06	2.34557e-05	Y
chr11_103173822_103187349	14.5095	-7.8006	1.61796	-4.82126	1.42658e-06	2.37194e-05	Y
chr6_129932678_129939997	14.4183	-6.77879	1.40657	-4.81938	1.44007e-06	2.38876e-05	Y
chr20_36685934_36694658	132.138	1.36024	0.283163	4.80373	1.55739e-06	2.57733e-05	Y
chr2_58425729_58459247	145.234	-1.33312	0.277732	-4.80002	1.58653e-06	2.61944e-05	N
chr11_103187274_103194718	10.8476	-7.72002	1.60942	-4.79676	1.61252e-06	2.65616e-05	Y
chr17_12011107_12016677	11.54	-7.85077	1.63717	-4.79532	1.62411e-06	2.66905e-05	Y
chr15_99250791_99251336	84.0744	-1.29925	0.271085	-4.79276	1.64501e-06	2.69713e-05	Y
chr20_34487292_34487570	14.826	-7.76808	1.62244	-4.7879	1.68539e-06	2.75696e-05	Y
chr2_101521195_101554304	13.1474	-6.7298	1.40774	-4.78058	1.74789e-06	2.85261e-05	N
chr15_50940884_50955243	88.0894	-1.20867	0.253114	-4.77521	1.79524e-06	2.92315e-05	Y
chr15_42553156_42560230	73.9231	-1.47922	0.309983	-4.77192	1.82474e-06	2.96436e-05	Y
chr9_100756913_100760960	37.3484	-2.01754	0.422978	-4.76985	1.84366e-06	2.98824e-05	Y
chrX_68250842_68256959	13.2919	8.03901	1.6874	4.76413	1.89673e-06	3.06724e-05	Y
chr5_38971979_38978752	11.8606	-6.73768	1.41459	-4.76299	1.90744e-06	3.07753e-05	Y
chr9_132265602_132265951	10.7534	-6.93416	1.45734	-4.75808	1.95447e-06	3.14626e-05	Y
chrX_14814282_14815420	14.1917	-7.77582	1.63448	-4.75736	1.9614e-06	3.15025e-05	Y
chr2_225400245_225422573	193.864	-0.883751	0.185843	-4.75537	1.98088e-06	3.17434e-05	N
chr2_36668401_36669878	99.2881	-1.01547	0.214051	-4.74407	2.09469e-06	3.34913e-05	Y
chr8_37330596_37333530	9.79759	7.07607	1.4927	4.74045	2.13244e-06	3.40183e-05	Y
chr2_135010666_135028121	35.6195	3.86968	0.816666	4.73839	2.15426e-06	3.42891e-05	Y
chr12_20790034_20807139	11.7468	-7.87579	1.6629	-4.73618	2.17788e-06	3.43562e-05	Y
chr18_18945988_18975522	11.1141	-7.79644	1.64581	-4.73715	2.16745e-06	3.43562e-05	Y
chr7_635783_751164	29.9895	3.3746	0.71239	4.73701	2.16892e-06	3.43562e-05	Y
chr9_138741983_138774924	33.7475	2.7201	0.574314	4.73626	2.17703e-06	3.43562e-05	Y
chr8_26439485_26441499	341.167	-0.947421	0.200601	-4.7229	2.32506e-06	3.65965e-05	N
chr7_42063067_42066011	11.263	7.80001	1.65412	4.71551	2.41107e-06	3.7866e-05	Y
chr10_486811_518489	14.2899	-8.06331	1.71653	-4.69743	2.63449e-06	4.12834e-05	Y
chr5_80419461_80422982	12.7946	-7.71971	1.64516	-4.69237	2.70064e-06	4.22266e-05	Y
chr7_140055468_140058585	58.4609	-1.57613	0.33623	-4.68765	2.76361e-06	4.3116e-05	Y
chr2_176835492_176860374	54.9016	-2.46192	0.525521	-4.68473	2.80329e-06	4.36389e-05	Y
chr1_215342542_215345526	10.6385	-7.73309	1.65392	-4.67562	2.93071e-06	4.53237e-05	Y
chr11_44129233_44151688	11.5188	7.18971	1.53755	4.67609	2.92396e-06	4.53237e-05	Y
chr13_99549742_99556960	19.017	6.4617	1.38188	4.67601	2.9251e-06	4.53237e-05	Y
chr15_75215989_75219228	55.058	-1.82019	0.39007	-4.66631	3.06658e-06	4.73215e-05	Y
chr5_170648762_170669824	10.7505	-7.74814	1.66087	-4.6651	3.08464e-06	4.74968e-05	Y
chr19_37689841_37698156	10.829	-7.75868	1.66509	-4.65961	3.16809e-06	4.86759e-05	Y
chr7_2054137_2108973	40.2458	2.91697	0.62754	4.64826	3.34754e-06	5.13217e-05	Y
chr12_117423011_117426674	157.332	-0.876804	0.18892	-4.64115	3.46483e-06	5.30052e-05	N
chr17_29483001_29497015	127.725	-1.32857	0.286827	-4.63196	3.62219e-06	5.52931e-05	Y
chr9_99537070_99538527	45.6366	-2.11815	0.45738	-4.63106	3.63802e-06	5.54152e-05	Y
chr7_77407655_77408131	75.0561	1.30439	0.281938	4.62651	3.71882e-06	5.65244e-05	Y
chr12_102291641_102295211	10.9543	-7.77518	1.68293	-4.62003	3.83682e-06	5.80688e-05	Y
chr5_158608968_158630664	10.6615	-7.73614	1.67435	-4.62038	3.83043e-06	5.80688e-05	Y
chr9_33960824_33963789	56.0151	3.30746	0.717072	4.61246	3.97939e-06	6.00981e-05	N
chr15_49517402_49531564	116.412	-1.21072	0.262607	-4.61038	4.01932e-06	6.0572e-05	Y
chr5_151169884_151175136	27.8065	3.49392	0.758109	4.60873	4.05145e-06	6.09266e-05	Y
chr5_647920_655699	17.9425	-4.64639	1.00891	-4.60536	4.11758e-06	6.17899e-05	Y
chr11_1307232_1311639	27.2743	4.11547	0.894001	4.60342	4.15599e-06	6.22344e-05	N
chr12_8082280_8083238	10.8199	7.74097	1.68182	4.60274	4.16961e-06	6.23067e-05	Y
chr5_58476421_58511794	302.911	-8.32141	1.81067	-4.59575	4.31199e-06	6.42986e-05	Y
chr7_105517627_105553084	11.1095	7.54496	1.64275	4.59287	4.37183e-06	6.5054e-05	Y
chr2_24181171_24199945	42.4083	1.84091	0.400994	4.59086	4.41426e-06	6.55476e-05	Y
chr18_12814202_12836890	26.0812	2.69077	0.586561	4.58736	4.48876e-06	6.65145e-05	Y
chr3_32774915_32778982	35.6304	-2.4625	0.537078	-4.585	4.53994e-06	6.71323e-05	Y
chr10_104018686_104044827	10.6923	-7.74049	1.68898	-4.58293	4.58503e-06	6.76578e-05	Y
chr4_151656410_151729550	77.0007	1.52627	0.333089	4.58217	4.60178e-06	6.77639e-05	Y
chr5_37243115_37247847	12.2763	-7.60188	1.65968	-4.58033	4.64252e-06	6.82219e-05	Y
chr12_29786080_29813818	10.6066	-7.72858	1.68893	-4.57601	4.73934e-06	6.95005e-05	Y
chr17_11984673_11999011	10.2806	-7.68369	1.67999	-4.57365	4.79303e-06	6.99979e-05	Y
chr17_70416841_70417207	13.0841	6.88781	1.50594	4.57375	4.79061e-06	6.99979e-05	Y
chr9_128305338_128348006	12.4411	-7.86755	1.72302	-4.56615	4.9676e-06	7.23981e-05	Y
chr19_23556544_23557566	70.8595	-1.67404	0.367615	-4.55378	5.26902e-06	7.66334e-05	Y
chr7_80447615_80458061	10.6421	-7.73357	1.69909	-4.55159	5.32415e-06	7.72765e-05	Y
chr7_155556503_155567341	19.0305	-6.11816	1.34642	-4.54401	5.51945e-06	7.99473e-05	Y
chr7_42116351_42262894	10.8675	7.74695	1.70936	4.53208	5.84062e-06	8.44268e-05	Y
chr7_23015829_23030758	10.2437	-7.63479	1.68847	-4.52172	6.13395e-06	8.84862e-05	Y
chr5_107521818_107684231	97.2154	-1.25264	0.277186	-4.51914	6.20914e-06	8.93889e-05	Y
chr10_126185530_126205840	9.71972	-7.07546	1.56966	-4.50763	6.55565e-06	9.4186e-05	Y
chr5_79498705_79501179	13.3276	7.12189	1.58141	4.50351	6.6839e-06	9.58341e-05	Y
chr5_14270934_14280545	13.62	-6.66689	1.48097	-4.50172	6.74058e-06	9.64516e-05	Y
chr3_197592294_197602646	84.4435	1.38957	0.308764	4.50042	6.78177e-06	9.68454e-05	Y
chr17_35343916_35348156	77.9785	1.80625	0.401491	4.49886	6.83201e-06	9.73664e-05	Y
chr9_33953283_33956144	25.0764	2.57521	0.572758	4.49616	6.91914e-06	9.84102e-05	Y
chr12_62892699_62895478	11.9636	-7.53379	1.67769	-4.49058	7.10302e-06	0.000100823	Y
chr9_102677460_102691125	64.0724	-1.33361	0.297282	-4.48601	7.25684e-06	0.0001028	Y
chr17_19999944_20013875	12.4057	-6.39966	1.42702	-4.48463	7.304e-06	0.000103262	Y
chr10_5815805_5842668	170.182	0.782606	0.174566	4.48314	7.35521e-06	0.000103779	N
chr12_27183667_27185614	10.9222	6.65578	1.48543	4.48071	7.43961e-06	0.000104761	N
chr20_33632308_33645374	31.6418	2.06653	0.461256	4.48022	7.45669e-06	0.000104793	Y
chr13_52992127_53001354	32.9169	2.21526	0.49482	4.47691	7.57328e-06	0.000106221	Y
chr12_46622936_46637097	951.812	-0.65608	0.146649	-4.47381	7.68379e-06	0.000107558	N
chr6_20739750_20781496	26.1395	-3.18715	0.713133	-4.46922	7.85052e-06	0.000109675	Y
chr1_44804717_44804994	10.5653	-6.66499	1.49183	-4.46765	7.90832e-06	0.000110265	Y
chr10_70218861_70229920	87.0131	-1.92238	0.431106	-4.45918	8.22753e-06	0.00011449	Y
chr2_170401231_170413807	53.0276	1.67264	0.375406	4.45556	8.36764e-06	0.000116212	Y
chr15_89656956_89698765	38.9549	2.69631	0.60553	4.4528	8.47563e-06	0.000117481	Y
chr21_45499445_45500008	21.3396	3.51378	0.789215	4.45224	8.49773e-06	0.000117557	Y
chr9_91680444_91692818	22.9123	-6.32146	1.42041	-4.45044	8.56949e-06	0.000118319	Y
chr20_45891032_45905539	17.2858	4.69144	1.05428	4.4499	8.59114e-06	0.000118387	Y
chr10_103432672_103436193	33.7331	2.47551	0.556517	4.44823	8.65821e-06	0.00011908	Y
chr12_65702309_65762806	10.3281	-7.6902	1.73508	-4.4322	9.3276e-06	0.000128038	N
chr12_50821545_50829407	48.0266	1.82388	0.411693	4.4302	9.41466e-06	0.000128983	Y
chr8_141840571_141900868	53.9521	-3.24471	0.733433	-4.42399	9.68926e-06	0.000132488	N
chr6_147581751_147599340	12.1138	-7.5792	1.71401	-4.4219	9.78381e-06	0.000133524	Y
chr2_234296903_234307095	23.7865	3.52174	0.796933	4.41912	9.91047e-06	0.000134992	Y
chr21_42609440_42622828	15.029	8.04469	1.82235	4.41445	1.01267e-05	0.000137672	Y
chr7_152007051_152012423	190.389	-1.39129	0.315258	-4.41317	1.0187e-05	0.000138227	Y
chrX_133607389_133632714	58.1312	-1.79303	0.406407	-4.41191	1.02462e-05	0.000138764	Y
chr17_80962991_81006661	9.61499	-7.58721	1.72322	-4.40293	1.06797e-05	0.000144338	Y
chr3_32479447_32483505	20.7772	3.69847	0.840074	4.40255	1.06985e-05	0.000144338	Y
chr12_70193989_70195501	183.945	-0.86408	0.196299	-4.40184	1.07335e-05	0.000144535	N
chr4_139135739_139144478	10.066	-7.65336	1.74235	-4.39254	1.12033e-05	0.000150575	Y
chr10_72099752_72100458	9.52191	-6.48195	1.47582	-4.3921	1.12259e-05	0.000150593	Y
chr15_50330965_50339661	9.80727	-7.61574	1.73651	-4.38567	1.15631e-05	0.000154823	Y
chr1_31478700_31479949	100.91	-1.31021	0.299205	-4.37897	1.19243e-05	0.000159358	Y
chr19_1031070_1032695	153.975	1.13514	0.259436	4.37541	1.21207e-05	0.000161678	Y
chr17_43552466_43553092	119.9	1.24622	0.285107	4.37106	1.23645e-05	0.00016462	Y
chr8_98817581_98837381	76.5073	-1.50637	0.345547	-4.35937	1.30439e-05	0.000173339	Y
chr5_78416164_78419286	9.81791	-7.61758	1.74817	-4.35747	1.31575e-05	0.000174521	Y
chr5_37213661_37224842	10.6717	-7.65272	1.76111	-4.3454	1.39023e-05	0.000184056	N
chr15_94899366_94913409	15.1506	-8.05233	1.85391	-4.34342	1.40279e-05	0.000185028	Y
chr19_34699834_34706566	19.6513	3.58105	0.824442	4.3436	1.40164e-05	0.000185028	Y
chr10_134503896_134540409	11.328	-7.40139	1.70453	-4.34219	1.41067e-05	0.000185721	Y
chr20_33954360_33971936	139.96	1.01168	0.23308	4.3405	1.4216e-05	0.000186812	N
chr21_42598193_42629253	24.5989	4.51512	1.04041	4.33973	1.42657e-05	0.000187118	Y
chr11_76670023_76709865	10.5213	-7.36754	1.69875	-4.33704	1.44417e-05	0.000189076	N
chr8_19442677_19459376	9.93175	-7.63384	1.7608	-4.33545	1.45465e-05	0.000190097	Y
chr11_120343759_120348235	42.7521	2.03423	0.469833	4.3297	1.49313e-05	0.000194409	Y
chr15_50330965_50399205	10.6579	-7.39197	1.70715	-4.33001	1.49102e-05	0.000194409	Y
chr8_126194345_126207514	9.41626	-7.55714	1.74609	-4.32803	1.50448e-05	0.000195527	Y
chr9_100109596_100112837	9.34647	-7.54633	1.74391	-4.32724	1.50989e-05	0.000195871	Y
chr7_99616854_99621930	10.0008	6.59672	1.52533	4.32477	1.52688e-05	0.000197713	Y
chr15_93428745_93435302	11.1782	-7.57207	1.75126	-4.32379	1.53374e-05	0.000198239	Y
chr10_93870833_93940776	9.49262	-7.56884	1.7512	-4.32208	1.54566e-05	0.000199415	Y
chr5_142416761_142437312	82.2746	1.38715	0.321327	4.31694	1.58205e-05	0.000203369	Y
chr8_141828376_141900868	72.9648	-1.69878	0.3935	-4.3171	1.58094e-05	0.000203369	Y
chr8_82626153_82630459	10.96	-7.40303	1.71544	-4.31553	1.59219e-05	0.000204302	Y
chr14_53558503_53570574	8.97115	-7.43845	1.72401	-4.31463	1.59872e-05	0.000204769	Y
chr7_33185854_33217203	254.206	-0.988744	0.229251	-4.31293	1.61108e-05	0.00020598	Y
chr5_141843535_141847396	14.0337	7.95376	1.84728	4.30565	1.66493e-05	0.00021248	N
chr5_167915607_167919852	9.38911	-7.55307	1.75453	-4.3049	1.67061e-05	0.000212823	Y
chr2_43655239_43755127	12.4686	6.26781	1.45742	4.30063	1.70314e-05	0.000216577	Y
chr9_74838036_74846097	101.923	-10.9692	2.55887	-4.28674	1.81311e-05	0.000230148	Y
chr5_179976931_179980471	78.1446	-1.2682	0.296555	-4.27643	1.89916e-05	0.00024064	Y
chr20_5939174_5948671	16.9445	5.04836	1.18109	4.27434	1.91707e-05	0.000242475	Y
chr15_48888480_48905289	9.34734	-7.54646	1.76673	-4.27143	1.94221e-05	0.000245217	Y
chr9_33953283_33973235	77.9873	1.2276	0.287468	4.2704	1.95122e-05	0.000245916	Y
chr1_225211317_225211567	16.0284	-6.04605	1.41607	-4.26961	1.95816e-05	0.000246353	Y
chr8_106427103_106456609	9.95244	7.62088	1.78526	4.26877	1.96554e-05	0.000246842	Y
chr17_18634383_18635447	10.0858	-7.65588	1.79581	-4.26319	2.01529e-05	0.000252642	Y
chr7_24663285_24681487	65.9171	-1.16644	0.274462	-4.2499	2.13861e-05	0.000267629	Y
chr7_131071879_131084192	95.0988	1.14687	0.269988	4.24785	2.15828e-05	0.000269613	Y
chr1_150413399_150416853	10.995	-7.31836	1.72334	-4.2466	2.17039e-05	0.000270649	N
chr16_7898762_7901929	9.20898	-7.52511	1.77443	-4.24086	2.22669e-05	0.000277182	Y
chr11_62638217_62639141	9.29663	-7.53878	1.77801	-4.24001	2.23511e-05	0.000277741	Y
chr1_59805630_59844509	15.5595	-5.91891	1.39692	-4.23713	2.264e-05	0.000280839	Y
chr18_18963471_18964364	9.06271	-7.50188	1.77179	-4.23407	2.295e-05	0.000284187	Y
chr1_155695173_155695810	64.7462	-1.40248	0.331884	-4.2258	2.3809e-05	0.00029389	Y
chr5_41927115_41930019	12.672	-7.28522	1.72401	-4.22573	2.38165e-05	0.00029389	Y
chr8_97549528_97551121	9.03878	-7.49815	1.77739	-4.21864	2.45782e-05	0.00030276	Y
chr15_100692817_100871259	9.27175	7.51821	1.78262	4.21751	2.47015e-05	0.000303724	Y
chr9_74810416_74817658	9.19622	-7.52315	1.78395	-4.21714	2.47421e-05	0.000303724	Y
chr12_116674626_116675510	87.9916	1.98744	0.471687	4.21348	2.51469e-05	0.000308158	Y
chr5_78964715_78977884	11.5556	-7.31069	1.73617	-4.21082	2.5444e-05	0.000311261	Y
chr5_167915607_167921655	83.63	-0.882463	0.209728	-4.20766	2.5803e-05	0.000315108	N
chr5_24277273_24282795	9.01487	-7.49408	1.78208	-4.20525	2.60788e-05	0.000317928	Y
chr5_32724804_32739136	8.99279	-7.49063	1.78332	-4.20038	2.66471e-05	0.000324298	Y
chr15_33180373_33194241	10.5308	7.27026	1.73249	4.19642	2.7117e-05	0.00032945	Y
chr11_66407149_66407594	37.0467	-4.02363	0.959242	-4.19459	2.73361e-05	0.000331544	N
chr12_56871444_56872046	11.5707	6.27536	1.49725	4.19125	2.77426e-05	0.000335344	Y
chr5_43700221_43704502	12.266	-7.78717	1.85797	-4.19123	2.77441e-05	0.000335344	Y
chr13_99500846_99508285	9.63635	7.57414	1.80754	4.19031	2.78569e-05	0.000336133	Y
chr5_31431683_31451747	9.7294	-6.45423	1.54146	-4.18708	2.82567e-05	0.000340378	Y
chr10_94733810_94774024	10.6643	-7.27009	1.73776	-4.18361	2.86915e-05	0.000345029	Y
chr12_122734418_122735646	10.2092	-7.29974	1.74518	-4.18281	2.8793e-05	0.000345663	N
chr16_85667520_85667738	90.6162	-1.5037	0.359551	-4.18217	2.88742e-05	0.000346051	Y
chr7_76922269_76924255	9.2132	7.35938	1.76549	4.16847	3.06651e-05	0.000366893	Y
chr10_94291505_94297307	41.2468	-1.67577	0.402099	-4.16756	3.07883e-05	0.000367746	Y
chr3_185251359_185252920	8.93627	-7.4814	1.79721	-4.16278	3.14395e-05	0.000374892	Y
chr1_225195115_225211567	8.25301	-6.63144	1.59378	-4.16081	3.17115e-05	0.0003775	Y
chr12_28408514_28544344	8.37167	-7.33383	1.76385	-4.15785	3.21261e-05	0.000381794	Y
chr13_64793357_64819610	8.52836	-6.64151	1.60017	-4.1505	3.31743e-05	0.000393591	Y
chr15_94942190_94945248	9.25072	-7.21679	1.74024	-4.147	3.36858e-05	0.00039899	Y
chr6_158733083_158735300	30.2512	2.09662	0.505949	4.14393	3.41398e-05	0.000403693	Y
chr2_241492331_241494472	10.1134	6.57118	1.58608	4.14302	3.42757e-05	0.000404624	Y
chr14_35295219_35331528	12.5864	-4.75929	1.14942	-4.14061	3.46379e-05	0.000407542	Y
chr4_79158664_79176529	11.4688	7.43702	1.79604	4.14078	3.46123e-05	0.000407542	Y
chr12_70149164_70150443	23.4431	4.22899	1.02266	4.13527	3.54542e-05	0.000416455	N
chr12_70901675_70916410	8.61221	-7.42829	1.79877	-4.12965	3.63316e-05	0.000426054	Y
chr16_68934337_68961986	9.24917	-7.53095	1.82571	-4.12495	3.70816e-05	0.000434131	Y
chr20_44444180_44444552	24.6855	2.21021	0.535864	4.12457	3.71434e-05	0.000434136	Y
chr3_23631225_23636741	10.2796	-7.5724	1.83742	-4.12121	3.76887e-05	0.000439061	Y
chr6_147527107_147560406	8.59919	-7.42616	1.8018	-4.12151	3.76393e-05	0.000439061	Y
chr1_97981282_98015300	8.61754	-7.42916	1.80332	-4.11971	3.79343e-05	0.000440721	Y
chr10_12291580_12292468	11.3118	-6.03134	1.46407	-4.11958	3.79557e-05	0.000440721	Y
chr17_57842332_57895134	11.2722	-7.67615	1.8651	-4.11568	3.86032e-05	0.000447507	Y
chr11_36248635_36248980	64.6198	-1.26434	0.307272	-4.11473	3.8763e-05	0.000448067	Y
chr3_194877178_194947585	20.4033	3.07376	0.74703	4.11464	3.87781e-05	0.000448067	Y
chr13_30854200_30857928	39.8679	1.90894	0.464249	4.11189	3.92428e-05	0.000452698	Y
chr7_56049903_56051561	132.634	-1.23647	0.300785	-4.11081	3.94265e-05	0.000454078	Y
chr1_213341201_213349835	38.6414	-1.94976	0.475082	-4.10404	4.05994e-05	0.000466827	Y
chr20_32677322_32678408	9.17172	7.18451	1.75122	4.10257	4.08582e-05	0.000469042	Y
chrX_16875717_16881223	11.5614	-7.41656	1.80802	-4.10202	4.09556e-05	0.000469399	Y
chr9_74823141_74834422	8.50758	-7.41071	1.81138	-4.09119	4.29169e-05	0.000491083	Y
chr20_56991842_56993419	8.95827	-7.19029	1.75928	-4.08707	4.36848e-05	0.000499064	Y
chr11_46098305_46113774	205.096	-0.850049	0.208042	-4.08595	4.38963e-05	0.000500673	N
chr11_106810186_106856857	8.55767	-7.41898	1.81775	-4.08142	4.47618e-05	0.000509723	Y
chr16_47531310_47549512	349.055	-0.64257	0.157584	-4.07764	4.54954e-05	0.000517246	N
chr11_72695133_72700142	77.895	-1.13137	0.277614	-4.07533	4.59501e-05	0.000521577	Y
chr11_72468812_72470426	32.5917	5.9891	1.47116	4.07102	4.68077e-05	0.000530462	N
chr7_77394812_77408131	9.4056	7.14784	1.75603	4.07046	4.69209e-05	0.000530896	Y
chr3_154801947_154836600	24.1175	-5.33372	1.31083	-4.06898	4.7219e-05	0.000533416	N
chr12_109046048_109048186	266.559	0.689721	0.169622	4.06623	4.77808e-05	0.000538903	N
chr6_5404775_5431405	118.743	-1.44142	0.354691	-4.06388	4.82638e-05	0.000543485	Y
chr5_154330381_154346797	29.7649	3.04092	0.748495	4.06271	4.85072e-05	0.00054536	Y
chr17_34910661_34923615	52.0679	1.36448	0.335963	4.06141	4.87775e-05	0.000547529	Y
chr7_143884054_144074283	11.3087	6.13325	1.51062	4.06009	4.90544e-05	0.000549766	Y
chr12_8083076_8084081	8.96979	7.47172	1.84065	4.05929	4.92225e-05	0.000550779	Y
chr9_33960824_33973235	54.0514	2.76815	0.682531	4.05572	4.99804e-05	0.000558377	Y
chr1_213251038_213290752	68.9533	-1.24498	0.307101	-4.05398	5.0354e-05	0.000561665	Y
chr2_191523884_191535185	10.7987	-6.23287	1.53811	-4.05229	5.0719e-05	0.000564761	Y
chr7_129679304_129688984	65.6567	1.56963	0.387377	4.05196	5.07911e-05	0.000564761	Y
chrX_106331666_106332069	240.569	-0.567508	0.140108	-4.0505	5.11084e-05	0.000567399	N
chr9_79852918_79853302	37.2615	-3.54953	0.876987	-4.04742	5.1785e-05	0.000574011	N
chr13_33091994_33101669	419.384	-0.466135	0.115284	-4.04336	5.26908e-05	0.000583139	N
chr5_34175550_34179202	14.7672	-7.89099	1.95925	-4.02756	5.63583e-05	0.000622755	Y
chr14_31637504_31638674	11.5303	-7.09972	1.76338	-4.02621	5.66836e-05	0.000625374	Y
chr17_30310018_30315516	64.9213	1.73368	0.431061	4.0219	5.77297e-05	0.000635175	Y
chr6_84894905_84896341	11.9255	-7.15282	1.77851	-4.02182	5.77513e-05	0.000635175	Y
chr5_179135240_179136060	24.2725	2.32247	0.577764	4.01976	5.82586e-05	0.000639761	Y
chr1_151630711_151641111	10.0474	-7.16619	1.78325	-4.01862	5.85408e-05	0.000641864	Y
chr8_141285757_141301177	25.0103	4.31817	1.07489	4.01732	5.88644e-05	0.000644415	N
chr5_80419412_80422982	9.30498	-7.17986	1.78755	-4.01659	5.90469e-05	0.000645415	Y
chr11_28700652_28763455	8.32832	-7.37997	1.83857	-4.01396	5.97072e-05	0.000651628	Y
chr10_70545893_70546449	32.9509	-2.19482	0.546909	-4.01313	5.99188e-05	0.00065293	Y
chr1_200729967_200730226	55.2742	-1.72943	0.431389	-4.00898	6.09826e-05	0.000663502	Y
chr14_37838722_37892154	8.36861	-7.38678	1.84355	-4.00683	6.15396e-05	0.000668535	Y
chr7_44025791_44026276	11.7526	-6.19682	1.54794	-4.00326	6.24744e-05	0.000677651	N
chr3_154832783_154836600	11.1937	-7.14923	1.78672	-4.00133	6.29886e-05	0.000682184	Y
chr17_58700882_58725443	18.5227	3.41353	0.853809	3.998	6.38787e-05	0.000690768	Y
chr15_80390758_80415142	20.3793	-2.15134	0.538182	-3.99741	6.4038e-05	0.000691435	Y
chr18_45391430_45423180	38.9079	-1.61613	0.40434	-3.99695	6.41636e-05	0.000691736	Y
chr2_135694411_135700244	8.88174	-7.08057	1.77263	-3.99438	6.48631e-05	0.000698214	Y
chr2_69267176_69271945	9.81683	-7.5005	1.87994	-3.98976	6.61404e-05	0.000710884	Y
chr22_45970391_45972988	8.15849	-7.35019	1.84958	-3.97397	7.06849e-05	0.000758578	Y
chr9_133333788_133342186	8.05348	-7.33156	1.84522	-3.97327	7.0894e-05	0.00075967	Y
chr16_4029117_4033441	37.113	-1.77474	0.447054	-3.96985	7.19177e-05	0.000769475	Y
chr16_56900982_56902284	8.53511	-7.41526	1.86908	-3.96732	7.2684e-05	0.000776502	Y
chr12_46633462_46637097	446.481	-0.558032	0.140732	-3.9652	7.33331e-05	0.000782256	N
chr1_21377359_21437876	7.97824	-7.31794	1.84847	-3.95892	7.52881e-05	0.000801903	Y
chr6_128643184_128643455	93.1151	-1.09135	0.275717	-3.95822	7.55102e-05	0.000803061	Y
chr13_113845186_113854830	43.1004	-2.95022	0.74562	-3.95673	7.59817e-05	0.000806105	N
chr14_40124049_40125012	14.2037	-5.52402	1.39615	-3.9566	7.60241e-05	0.000806105	N
chr2_48555700_48573890	33.3917	2.37858	0.601419	3.95495	7.65507e-05	0.000810279	Y
chr4_103225474_103236987	291.425	-1.16826	0.295413	-3.95465	7.66465e-05	0.000810279	Y
chr7_157361594_157370832	19.6758	6.68291	1.69046	3.95332	7.7075e-05	0.000813595	N
chr2_10281981_10282502	53.8011	2.2261	0.563532	3.95027	7.80625e-05	0.000822793	N
chr9_4823548_4833228	132.386	-1.23317	0.312255	-3.94925	7.83977e-05	0.000825098	Y
chr1_93070864_93073284	7.82674	-6.98106	1.76844	-3.94759	7.89434e-05	0.000829608	Y
chr7_102106264_102106717	58.7164	1.49709	0.379291	3.94706	7.91161e-05	0.000830191	Y
chr8_95673126_95674783	18.5721	6.46689	1.64007	3.94305	8.0452e-05	0.000842952	N
chr17_47388674_47389404	60.9047	-1.30087	0.329943	-3.9427	8.05702e-05	0.000842952	Y
chr3_145838899_145842016	36.6389	-9.46506	2.40437	-3.93661	8.26424e-05	0.000863357	Y
chr15_57383987_57387361	58.8567	-1.53778	0.390888	-3.93406	8.35212e-05	0.000871253	Y
chr11_17899755_18031686	17.3478	3.53746	0.899282	3.93365	8.36671e-05	0.000871491	Y
chr5_38527257_38530768	8.06688	-7.3339	1.86509	-3.9322	8.4171e-05	0.000875453	Y
chr7_90355881_90377090	7.87026	-7.29835	1.85647	-3.93131	8.44838e-05	0.000877418	Y
chr11_85966264_85967554	14.5365	-5.40216	1.37435	-3.9307	8.46995e-05	0.00087837	Y
chr14_100551024_100563995	7.8932	-7.30246	1.85803	-3.93022	8.48687e-05	0.000878838	Y
chr3_31917925_31921322	172.766	-0.975761	0.248322	-3.92942	8.51511e-05	0.000880475	Y
chr10_7290510_7327916	7.94004	-7.31118	1.86137	-3.92784	8.57131e-05	0.000884994	Y
chr7_157449049_157475629	32.8958	5.70489	1.45439	3.92253	8.76244e-05	0.000903411	N
chr5_167927596_167929110	58.5387	-1.8158	0.463366	-3.91872	8.90219e-05	0.000916485	Y
chr18_9524592_9525849	87.105	1.03033	0.26309	3.91628	8.99276e-05	0.000923127	N
chr17_19921300_20013875	10.786	-6.17438	1.5765	-3.91652	8.98358e-05	0.000923127	Y
chr5_353845_376831	283.689	4.73136	1.2092	3.9128	9.1233e-05	0.000935171	N
chr15_49528048_49531564	277.518	-0.587982	0.150316	-3.91163	9.16763e-05	0.000938357	N
chr6_45399600_45480144	7.9902	7.30462	1.86874	3.90885	9.27364e-05	0.000947838	Y
chr10_530721_532470	26.2435	-8.97581	2.29662	-3.90827	9.29597e-05	0.000948752	N
chr2_106774514_106782539	64.1521	1.43263	0.367039	3.9032	9.49277e-05	0.000967443	Y
chr2_24787164_24807429	45.4738	1.4839	0.380229	3.90265	9.51459e-05	0.000968274	Y
chr12_32871577_32875567	10.5661	-6.76531	1.73435	-3.90079	9.5881e-05	0.000974355	Y
chr9_100372628_100373981	12.7068	-7.72401	1.98101	-3.89902	9.65827e-05	0.00098008	Y
chr17_77642782_77653884	8.30055	-7.37524	1.89195	-3.89823	9.69001e-05	0.000981893	Y
chr7_105103068_105108910	37.9448	1.66718	0.427798	3.89712	9.73443e-05	0.000984985	Y
chr1_21377359_21415706	8.86421	-7.47024	1.91791	-3.895	9.82004e-05	0.00099223	Y
chr16_56906263_56906698	8.07777	-7.33615	1.88371	-3.89452	9.83937e-05	0.000992767	Y
chr15_100871094_100874385	9.93785	7.61973	1.95735	3.89287	9.90637e-05	0.000996124	Y
chr2_198367763_198368054	25.7137	2.34692	0.602907	3.89267	9.91483e-05	0.000996124	Y
chr22_28910745_28913267	7.76228	-7.27849	1.86947	-3.89335	9.88703e-05	0.000996124	Y
chr10_65140078_65214849	27.406	-2.49233	0.641059	-3.88784	0.000101142	0.00101471	Y
chr6_138794443_138817508	45.6478	1.5438	0.39713	3.8874	0.000101322	0.00101509	Y
chr8_37623044_37623873	65.2286	-1.32673	0.341498	-3.88504	0.000102314	0.00102357	Y
chr9_125659558_125659855	7.98648	-7.23424	1.86339	-3.88229	0.000103477	0.00103375	Y
chr1_202385915_202398057	9.99755	-7.50489	1.93482	-3.87885	0.000104951	0.00104552	Y
chr9_111812563_111812972	34.2586	2.08407	0.537264	3.87905	0.000104865	0.00104552	Y
chr19_45528587_45528995	23.9201	2.5679	0.662366	3.87686	0.000105812	0.00105262	Y
chr15_51743842_51747425	10.6357	-7.54469	1.94698	-3.87507	0.000106595	0.00105892	Y
chr13_96637493_96648389	95.8134	-1.44851	0.373921	-3.87383	0.000107139	0.00106135	Y
chr15_76226083_76226820	8.44337	-6.98519	1.80316	-3.87386	0.000107125	0.00106135	Y
chr13_51893807_51894187	7.82773	-7.29071	1.88262	-3.87263	0.000107666	0.00106211	Y
chr14_31097415_31107453	8.32092	-6.99115	1.80525	-3.87268	0.000107645	0.00106211	Y
chr5_65307877_65310553	28.0364	-2.48032	0.640435	-3.87286	0.000107564	0.00106211	Y
chr7_64004085_64004810	117.577	1.19192	0.307833	3.87198	0.000107956	0.0010635	Y
chr10_50701163_50714058	7.75695	-7.27752	1.88024	-3.87052	0.000108601	0.00106837	Y
chr18_21095820_21099138	10.4577	6.96415	1.80071	3.86746	0.000109976	0.00108039	Y
chr15_67956935_68040939	7.70203	-7.26712	1.88207	-3.86123	0.000112816	0.00110676	Y
chr10_7262373_7269899	7.61488	-7.25068	1.87822	-3.8604	0.0001132	0.00110745	Y
chr8_6582391_6605349	38.3619	-2.63128	0.681552	-3.86072	0.000113054	0.00110745	Y
chr10_70190193_70190417	11.3882	-7.10599	1.84141	-3.85899	0.000113856	0.00111234	Y
chr14_67431908_67525503	35.8935	1.37097	0.355412	3.85742	0.000114592	0.00111645	Y
chr15_60648118_60656722	22.8368	2.50633	0.649714	3.85759	0.000114512	0.00111645	Y
chr3_9792629_9793633	7.90132	-7.2178	1.87141	-3.85688	0.000114843	0.00111735	Y
chr3_196812451_196842954	48.3769	1.89705	0.492383	3.85279	0.00011678	0.00113464	Y
chr11_11901724_11919240	8.04594	-7.32989	1.90568	-3.84634	0.000119897	0.00116333	Y
chr1_246890194_246907427	10.6636	-7.54204	1.96127	-3.84548	0.000120315	0.00116579	Y
chr16_88061089_88071617	338.696	0.657362	0.171022	3.84372	0.000121181	0.00116938	N
chr17_29061917_29096983	9.31422	6.95726	1.80995	3.84389	0.000121101	0.00116938	Y
chr7_40037093_40041630	21.502	-3.9942	1.03907	-3.84401	0.000121038	0.00116938	Y
chr17_6493099_6503778	16.2142	3.56319	0.927279	3.84263	0.000121723	0.00117302	Y
chr2_43655239_43657441	25.3188	2.4605	0.64075	3.84004	0.000123016	0.00118387	Y
chr9_102814699_102822454	52.3537	-1.35042	0.351707	-3.83962	0.000123223	0.00118425	Y
chr10_24918925_24924032	7.57794	-7.24382	1.88712	-3.83856	0.00012376	0.0011878	Y
chr1_119805525_119820595	8.69356	-7.33709	1.91235	-3.83669	0.000124702	0.00119438	Y
chr13_113170754_113176823	10.6924	-5.87695	1.53184	-3.83653	0.000124783	0.00119438	Y
chr19_10368898_10369361	9.88257	7.0153	1.82947	3.83461	0.000125764	0.00120214	Y
chr16_16108348_16110478	8.5425	-6.92037	1.80591	-3.83206	0.000127075	0.00121304	Y
chr5_135483521_135489852	48.5119	1.57786	0.411965	3.83008	0.000128103	0.0012212	Y
chr14_55168780_55169298	87.5144	0.958138	0.250718	3.82158	0.000132599	0.00126236	N
chr22_44229520_44237812	7.59877	-7.24769	1.89845	-3.8177	0.000134704	0.00128068	Y
chr7_959605_975141	20.8345	4.82568	1.2643	3.81688	0.000135149	0.00128319	Y
chr1_46290105_46348067	10.581	7.51279	1.96978	3.81402	0.000136726	0.00129642	Y
chr1_115005726_115007010	84.5926	-1.00082	0.262493	-3.81274	0.000137435	0.00130141	Y
chr12_110832906_110834257	9.52505	-7.43092	1.95116	-3.80847	0.000139829	0.00132231	Y
chr22_30032740_30038274	169.261	-0.727411	0.191021	-3.80801	0.000140087	0.00132298	N
chr1_207989274_207990759	49.0242	-2.03996	0.535842	-3.80702	0.000140654	0.00132656	Y
chr7_130737184_130738224	7.64303	-7.25589	1.90734	-3.80418	0.000142272	0.00134005	Y
chr2_188348851_188368497	7.41517	-7.21241	1.89653	-3.80294	0.000142987	0.00134499	Y
chr11_11895347_11901927	24.314	-3.73846	0.983908	-3.79961	0.000144927	0.00136143	Y
chr5_43292576_43297268	18.7738	-5.53357	1.45881	-3.79321	0.000148712	0.00139145	Y
chr6_151226786_151247431	7.70371	-6.91886	1.82394	-3.79337	0.000148619	0.00139145	Y
chr7_94248070_94259153	7.72213	-7.2708	1.9165	-3.79379	0.000148364	0.00139145	Y
chr10_7262373_7327916	7.3957	-7.2087	1.90076	-3.79254	0.000149113	0.00139336	Y
chr8_90600120_90608741	27.7541	-4.00909	1.05842	-3.7878	0.00015199	0.00141837	Y
chr6_56564451_56600087	46.9397	-3.10212	0.81916	-3.78695	0.000152506	0.00142132	N
chr7_101559395_101559787	9.99583	-7.4594	1.97217	-3.78232	0.000155372	0.00144612	Y
chr6_75078806_75081842	7.41182	-7.21177	1.90748	-3.78078	0.000156339	0.00145321	Y
chr7_2414163_2416710	14.8803	6.72551	1.7795	3.77945	0.000157177	0.00145909	Y
chr3_67546222_67559327	136.245	-0.916753	0.242598	-3.7789	0.000157524	0.00146039	N
chr7_101870647_101870949	9.32851	6.90352	1.82832	3.77588	0.000159444	0.00147627	Y
chr4_148886175_148887990	20.7151	-2.92638	0.775277	-3.77463	0.000160246	0.00148176	Y
chr7_16722405_16729531	21.9105	2.77214	0.735885	3.76708	0.000165169	0.00152528	Y
chr9_6420912_6421142	10.213	-5.82501	1.54719	-3.76488	0.000166627	0.00153675	Y
chr1_59787208_59812070	13.7395	-5.57452	1.48093	-3.76419	0.00016709	0.00153901	N
chr12_31595709_31600703	8.26476	-7.25836	1.92945	-3.76189	0.000168634	0.0015492	Y
chr5_79974746_80040434	40.7947	-1.67545	0.445356	-3.76205	0.000168527	0.0015492	Y
chr12_11126254_11199787	40.3762	-2.93307	0.779834	-3.76115	0.000169136	0.00155106	N
chr21_32554738_32567621	51.7122	1.97208	0.524359	3.76094	0.000169274	0.00155106	Y
chr15_72847612_72864506	7.2591	-7.1816	1.91453	-3.75111	0.000176056	0.00161112	Y
chr1_197611841_197643299	7.46737	-7.22231	1.92818	-3.74567	0.000179914	0.0016443	Y
chr1_116562203_116563506	7.47617	-7.22398	1.92987	-3.74324	0.000181665	0.00165816	Y
chr6_43106587_43107263	16.6925	6.46109	1.72848	3.73803	0.000185469	0.00168996	N
chr16_28157415_28181230	8.26986	-6.06144	1.62165	-3.73782	0.000185626	0.00168996	Y
chr11_108098322_108106561	29.4823	3.61731	0.968057	3.73667	0.000186474	0.0016955	N
chr20_57014001_57016139	35.7126	-1.93199	0.517087	-3.73629	0.000186752	0.00169586	Y
chr6_155095123_155114110	9.37811	-6.19132	1.65852	-3.73305	0.000189177	0.00171568	Y
chr8_8011709_8012052	7.17083	-7.16393	1.92064	-3.72997	0.000191503	0.00173455	Y
chr9_113734353_113735838	18.002	6.41248	1.7207	3.72667	0.000194027	0.00175517	N
chr2_72945232_72958374	28.833	-2.96639	0.796391	-3.72479	0.000195479	0.00176604	N
chr14_70442432_70461197	7.1262	-7.15513	1.92131	-3.72409	0.000196023	0.0017687	Y
chr17_80828100_80858607	90.0876	1.25433	0.336949	3.72261	0.000197176	0.00177524	Y
chr2_220657099_220658892	9.00342	7.47681	2.00854	3.72251	0.000197249	0.00177524	Y
chr12_7980091_8083238	7.2327	7.16074	1.92423	3.72135	0.00019816	0.00178118	Y
chr7_8043538_8064444	13.9266	-4.82688	1.29754	-3.72003	0.000199201	0.00178827	Y
chr5_72151601_72171564	7.86878	-7.29776	1.96287	-3.7179	0.000200886	0.00180111	Y
chr1_3496389_3512011	7.73757	7.25687	1.95255	3.71661	0.000201911	0.00180801	Y
chr21_42613746_42622828	7.2351	7.1612	1.92779	3.71472	0.000203429	0.0018193	Y
chrX_80047353_80049271	55.2956	-1.87338	0.504432	-3.71385	0.000204131	0.00182328	N
chr19_37203288_37203769	21.8358	2.01756	0.543368	3.71306	0.000204765	0.00182664	Y
chr5_31448654_31451747	72.5976	-1.63637	0.441191	-3.70899	0.00020809	0.00185397	Y
chr6_57244699_57246966	12.3896	-7.57729	2.04352	-3.70796	0.000208934	0.00185915	NA
chr10_5827815_5842668	41.5565	1.68755	0.455441	3.70532	0.000211125	0.00187628	Y
chr13_114806476_114839312	67.8335	1.22061	0.329565	3.70369	0.000212485	0.001886	Y
chr9_6420912_6434173	170.384	0.84227	0.227458	3.70297	0.000213086	0.00188897	N
chr6_43501644_43516197	6.61843	6.04971	1.63418	3.70198	0.000213926	0.00189404	Y
chr1_214564331_214571344	27.859	1.66626	0.450164	3.70145	0.000214371	0.00189562	Y
chr22_46572650_46594488	7.0455	-7.13864	1.93124	-3.6964	0.000218674	0.00193126	Y
chr12_20774230_20792891	7.55116	-7.23846	1.95867	-3.69561	0.000219362	0.00193492	Y
chr10_76074425_76158337	44.1197	-2.09321	0.566625	-3.69417	0.000220604	0.00194345	Y
chr11_46515158_46529920	313.719	-1.7101	0.463045	-3.69317	0.000221475	0.0019487	Y
chr15_49880213_49882204	7.04413	-7.13837	1.93622	-3.68675	0.000227134	0.00199602	Y
chr11_14880589_14882912	11.4202	-5.67777	1.54064	-3.68532	0.000228416	0.0020048	N
chr12_102107868_102110590	8.847	-7.30963	1.98389	-3.68449	0.000229159	0.00200883	Y
chr2_43805652_43818093	15.7879	4.64674	1.26135	3.68393	0.000229661	0.00201074	Y
chr17_59067332_59067596	7.41672	-6.8091	1.84949	-3.6816	0.000231776	0.00202675	Y
chr5_176562088_176619020	10.7515	-5.97259	1.62248	-3.68114	0.000232194	0.0020279	Y
chr11_110007388_110008139	66.5688	1.04908	0.285145	3.67913	0.000234031	0.00204143	N
chr9_14146688_14179779	43.0504	1.4647	0.398232	3.678	0.000235066	0.00204794	Y
chr2_172305191_172333460	7.47305	-5.82881	1.58722	-3.67234	0.000240341	0.00209132	Y
chr5_37342651_37350367	7.11328	-6.80954	1.85545	-3.67002	0.000242533	0.00210781	Y
chr11_107959254_107960350	8.9739	-5.69315	1.5515	-3.66945	0.000243068	0.00210987	N
chr14_35020920_35024118	41.3379	-1.20727	0.329076	-3.66868	0.000243809	0.00211371	Y
chr6_117010483_117026323	31.9961	-2.12456	0.579284	-3.66756	0.000244878	0.00212038	Y
chr19_24288742_24290845	8.70073	-7.28265	1.98587	-3.66723	0.000245191	0.0021205	Y
chr7_23015829_23023664	6.96368	-7.12175	1.94218	-3.66688	0.000245525	0.00212079	Y
chr1_200729967_200784772	91.2817	-0.952786	0.259937	-3.66546	0.000246898	0.00212895	N
chr7_98985662_98987635	7.85819	6.90529	1.88398	3.66528	0.00024707	0.00212895	Y
chr2_99811214_99812219	27.1908	-3.12276	0.852456	-3.66325	0.000249034	0.00214327	Y
chr13_96837104_96840751	7.05057	-7.13966	1.95194	-3.65772	0.000254466	0.00218736	Y
chr14_32902666_32903023	10.1625	-6.68066	1.82965	-3.65134	0.000260877	0.00223975	Y
chr15_94910834_94928754	8.98538	-7.31097	2.00272	-3.65053	0.0002617	0.00224409	Y
chr15_94899366_94945248	22.9923	-3.74526	1.02655	-3.6484	0.00026388	0.00226005	N
chr5_41794105_41807540	40.1127	-2.74794	0.753308	-3.64783	0.000264464	0.00226232	N
chr2_178326621_178333252	7.42833	-6.73168	1.84601	-3.6466	0.000265729	0.00226493	N
chr9_6814631_6893232	45.8376	2.14857	0.589167	3.64678	0.000265545	0.00226493	N
chr21_32537279_32567621	54.3232	2.06787	0.567042	3.64677	0.000265557	0.00226493	Y
chr2_135010666_135076310	11.7735	6.95059	1.90694	3.64489	0.000267503	0.00227731	Y
chr5_72374007_72378652	10.4177	-6.76479	1.8565	-3.64385	0.000268594	0.00228385	Y
chr3_119624602_119666198	6.90356	-7.10909	1.95122	-3.64341	0.000269049	0.00228498	Y
chr3_98586135_98600611	8.95072	7.3666	2.02325	3.64097	0.000271618	0.00230404	Y
chr1_1158624_1159348	19.5622	2.56634	0.704985	3.64028	0.000272337	0.00230737	Y
chr1_180971742_180974599	51.1659	1.14007	0.313272	3.63922	0.000273465	0.00231416	Y
chr11_128910823_128936763	34.9778	3.36916	0.926867	3.635	0.000277976	0.00234673	Y
chr12_45097509_45108524	6.8581	7.08328	1.94848	3.63528	0.000277684	0.00234673	Y
chr2_113405230_113410375	7.13346	7.04524	1.93862	3.63414	0.000278905	0.00235176	Y
chr1_61798184_61824946	6.80302	-7.08797	1.95231	-3.63055	0.000282816	0.00238191	Y
chr16_29916173_29917448	6.96415	7.0077	1.93066	3.62969	0.000283762	0.00238704	Y
chr3_171830242_171851336	81.2119	-0.957323	0.263886	-3.62779	0.00028586	0.00239926	N
chr4_17963526_17974508	197.665	-0.844692	0.232861	-3.62745	0.000286232	0.00239926	N
chr11_61096835_61097546	34.3706	-1.8773	0.517491	-3.62769	0.000285968	0.00239926	Y
chrX_46510545_46513140	35.8722	-1.76568	0.487407	-3.62259	0.000291668	0.00244194	Y
chr19_2438161_2438529	9.06937	-5.74209	1.58602	-3.62044	0.0002941	0.0024565	N
chr1_156303338_156304709	41.8796	-1.39802	0.38612	-3.62069	0.000293815	0.0024565	Y
chr13_96665561_96684225	19.4361	-3.77708	1.0441	-3.61755	0.000297409	0.00247677	N
chr9_125230840_125231464	16.3434	5.89631	1.62999	3.6174	0.000297576	0.00247677	N
chr12_121220458_121229360	13.3786	-5.08154	1.40459	-3.61782	0.000297097	0.00247677	Y
chr1_118449128_118461358	5.81966	-6.61903	1.83257	-3.61188	0.000303986	0.0025262	Y
chr17_58700882_58711338	62.233	1.53532	0.425099	3.61167	0.000304229	0.0025262	Y
chr6_56564451_56569167	8.02438	-7.18207	1.98891	-3.61106	0.000304944	0.00252918	Y
chr14_45618040_45628483	6.9059	-7.10999	1.97013	-3.60888	0.000307517	0.00254753	Y
chr1_95609447_95616975	40.2871	-2.82904	0.784577	-3.60582	0.000311172	0.00257122	N
chr10_4872867_4950612	7.60019	6.68203	1.85325	3.60557	0.000311466	0.00257122	Y
chr15_90969342_90977027	6.99729	-7.0334	1.95067	-3.60564	0.000311386	0.00257122	Y
chr11_8987451_8989588	6.82185	-7.09229	1.96763	-3.60448	0.000312782	0.00257609	Y
chr7_23650790_23651172	49.0124	-1.48273	0.411333	-3.60469	0.000312524	0.00257609	Y
chr9_115030329_115038293	7.54913	-6.68244	1.85414	-3.60407	0.00031327	0.00257711	Y
chr7_30395344_30405911	50.499	-1.22136	0.339195	-3.60075	0.000317295	0.00260719	Y
chr15_56216844_56258744	7.09917	-7.14974	1.9864	-3.59934	0.000319021	0.00261531	Y
chr5_81548381_81550144	7.21348	-6.6733	1.85392	-3.59957	0.000318747	0.00261531	Y
chr17_4192525_4200109	19.613	-3.75897	1.04531	-3.59602	0.000323121	0.00264586	N
chr3_19992298_19992553	7.08261	-6.77557	1.88542	-3.59367	0.000326054	0.00266679	Y
chr22_46096162_46098727	14.0736	-5.20295	1.44934	-3.58988	0.00033083	0.00270273	Y
chr10_93220184_93221941	6.5883	-7.04185	1.966	-3.58181	0.00034122	0.0027844	Y
chr9_33036572_33037113	15.888	3.93626	1.09913	3.58124	0.00034197	0.00278731	N
chr1_70650468_70654956	6.89722	-7.1082	1.98629	-3.57864	0.000345384	0.0028119	Y
chr16_16101673_16130460	9.35051	-7.31777	2.04516	-3.57809	0.000346108	0.00281456	Y
chr19_3660964_3661999	65.1279	1.11369	0.311344	3.57703	0.000347514	0.00282276	Y
chr17_19843026_19850818	8.37021	-6.78424	1.89753	-3.57529	0.000349836	0.00283264	Y
chr3_4403723_4452662	6.81702	-7.09088	1.98334	-3.57522	0.000349931	0.00283264	Y
chr9_119093523_119097353	6.72788	-7.0723	1.9779	-3.57565	0.000349357	0.00283264	Y
chr10_71243447_71258152	19.1822	-4.86899	1.3623	-3.57411	0.000351426	0.00284149	N
chrX_53627078_53631795	52.1986	1.45246	0.406428	3.57373	0.00035193	0.00284233	Y
chr2_68717322_68753374	7.36524	7.06486	1.97754	3.57255	0.000353516	0.00285188	Y
chr1_21083659_21100103	70.2373	-1.03604	0.290025	-3.57224	0.000353941	0.00285206	Y
chr7_128655033_128658211	682.903	-0.429386	0.120308	-3.56906	0.000358267	0.00288364	N
chr4_7840251_7857301	6.82248	-7.09201	1.98784	-3.5677	0.000360125	0.00289531	Y
chr7_65592691_65599361	52.277	-1.12588	0.315698	-3.56632	0.000362026	0.00290439	Y
chr9_90313571_90315152	6.59053	-7.04232	1.97469	-3.56629	0.000362074	0.00290439	Y
chr21_45497574_45500008	40.337	1.85478	0.520568	3.563	0.000366643	0.00293439	Y
chr5_134388144_134411078	50.5443	-1.47983	0.415313	-3.56317	0.000366404	0.00293439	Y
chr1_179100446_179102509	81.9576	-0.830469	0.233485	-3.55685	0.000375331	0.00300053	N
chr17_41201138_41209152	10.2663	6.95477	1.95766	3.5526	0.000381446	0.00304598	N
chr17_4186093_4200109	129.518	-0.882707	0.248504	-3.55209	0.000382184	0.00304844	N
chr8_128231055_128236720	6.41251	-7.0028	1.97177	-3.55153	0.000382993	0.00305145	Y
chr1_1158624_1164326	6.5256	7.01185	1.97578	3.5489	0.000386851	0.00307771	Y
chr4_139100371_139106398	6.62761	-7.05024	1.98672	-3.54869	0.000387158	0.00307771	Y
chr11_9304918_9316934	7.74074	-7.12462	2.00787	-3.54834	0.000387669	0.00307823	Y
chr5_80911292_80946158	8.23932	-7.19452	2.02774	-3.54805	0.000388093	0.00307823	Y
chr11_122162992_122164314	6.44053	-6.66884	1.88055	-3.54622	0.000390793	0.00308583	Y
chr12_31648744_31652605	9.32125	-7.31256	2.06202	-3.5463	0.000390675	0.00308583	Y
chr5_127800417_127866386	6.86933	-7.10208	2.00226	-3.54702	0.000389609	0.00308583	Y
chr7_8043538_8062199	5.89267	-6.80412	1.91869	-3.54624	0.000390772	0.00308583	Y
chr16_23654276_23672602	10.7157	-6.49495	1.83334	-3.54268	0.000396078	0.00312408	Y
chr1_233482188_233490757	37.5692	-1.42208	0.401713	-3.54003	0.000400081	0.00315214	Y
chr5_37142412_37148370	7.32929	-7.19524	2.03283	-3.53952	0.00040085	0.00315469	Y
chr10_11789348_11797607	6.46718	-7.01523	1.98374	-3.53636	0.000405689	0.00318923	Y
chr10_98703870_98711953	6.62693	-5.79025	1.63782	-3.53534	0.000407245	0.00319791	N
chr21_47801609_47805898	75.4001	-1.20443	0.340754	-3.5346	0.000408395	0.00320339	Y
chr10_4872867_4884696	44.6622	7.86449	2.22604	3.53295	0.000410954	0.00321971	N
chr8_141900642_141900868	6.8878	-7.10588	2.01147	-3.53267	0.000411385	0.00321971	Y
chr19_6262239_6270770	24.8713	-3.03632	0.859792	-3.53145	0.000413284	0.003231	Y
chr4_120166492_120170037	7.35415	-6.77111	1.91804	-3.53022	0.000415207	0.00323889	N
chr6_10703638_10705077	113.488	1.01737	0.288177	3.53035	0.000415012	0.00323889	N
chr9_74817487_74834422	42.7343	-9.6543	2.7359	-3.52874	0.000417537	0.00325348	Y
chrX_76829715_76851255	14.6705	-3.80313	1.0781	-3.52762	0.000419319	0.00326377	Y
chr17_29483001_29491097	6.44637	-7.01022	1.98825	-3.52582	0.000422168	0.00327652	Y
chr18_18945988_18964364	6.51156	-7.02487	1.99217	-3.52625	0.000421496	0.00327652	Y
chr7_99672758_99673253	14.9199	2.48116	0.703732	3.52571	0.000422344	0.00327652	Y
chr8_8873832_8877974	23.6482	-3.5955	1.02037	-3.52374	0.000425508	0.00329745	N
chr8_37971710_37978667	40.3866	1.64961	0.468203	3.52328	0.000426246	0.00329957	Y
chr11_9304918_9309353	6.44314	-7.00951	1.99008	-3.52223	0.000427925	0.00330894	Y
chr13_36939637_36943737	6.4254	-7.00563	1.98955	-3.52122	0.000429566	0.00331439	Y
chr8_6312664_6357450	8.82081	-7.26004	2.06178	-3.52124	0.000429526	0.00331439	Y
chr3_12558110_12560696	29.9288	-3.65087	1.03821	-3.51649	0.000437295	0.00337036	N
chr15_41648237_41650456	7.10157	-7.02046	1.99815	-3.51348	0.000442271	0.0033979	Y
chr15_57523350_57526305	6.45953	-6.67149	1.89861	-3.51387	0.000441624	0.0033979	Y
chr8_27382879_27394372	10.0207	5.73923	1.6335	3.51346	0.000442307	0.0033979	Y
chr14_39782544_39796226	40.9119	-2.7531	0.784407	-3.50978	0.000448472	0.00344152	N
chr8_17532695_17573410	6.35252	-6.98907	1.99284	-3.50709	0.000453043	0.00347284	Y
chr18_11752852_11753944	6.38214	-6.9961	1.99548	-3.50598	0.000454934	0.00348356	Y
chr6_106727536_106740981	6.06745	-6.52042	1.86023	-3.50516	0.000456325	0.00349045	Y
chr4_177632653_177650900	6.34062	-6.98643	1.99532	-3.50141	0.000462809	0.00353622	Y
chr6_57072426_57075243	22.5927	-3.76985	1.07685	-3.5008	0.000463866	0.00354036	N
chr9_101542471_101544855	10.9539	6.65266	1.90048	3.50052	0.00046435	0.00354036	N
chr6_159001972_159010814	380.55	-0.698728	0.199681	-3.49923	0.000466608	0.0035508	N
chr6_155108995_155116273	54.533	1.27208	0.36354	3.49916	0.000466722	0.0035508	Y
chr13_103275227_103280274	62.2399	1.16835	0.334354	3.49436	0.000475201	0.00360558	N
chr16_71748415_71748704	9.10651	-6.76915	1.93724	-3.49422	0.00047545	0.00360558	Y
chr5_83356119_83362425	6.2402	-6.96344	1.9927	-3.49448	0.000474992	0.00360558	Y
chr12_29904599_29921008	6.2128	-6.95724	1.99276	-3.49125	0.000480765	0.00364198	Y
chr9_118997418_118997916	6.56526	-7.03647	2.01627	-3.48985	0.000483299	0.00365727	Y
chr18_13681604_13682104	138.411	0.978888	0.280545	3.48924	0.000484396	0.00366166	N
chr9_140348183_140350938	7.62389	7.23544	2.07458	3.48766	0.000487261	0.00367939	Y
chr2_85097349_85097909	6.52506	-7.02823	2.01558	-3.48694	0.000488576	0.0036854	Y
chr1_233372591_233388534	7.35855	-5.52095	1.58371	-3.48608	0.000490152	0.00369335	N
chr2_9490937_9508648	53.9753	1.37794	0.395337	3.48547	0.000491275	0.00369787	Y
chr7_635783_647089	16.8232	3.9414	1.13122	3.48422	0.000493578	0.00371126	Y
chr2_143642918_143718339	6.14412	-6.94108	1.99279	-3.48309	0.000495653	0.00372291	Y
chr16_929570_961079	8.69883	-5.58263	1.60354	-3.48143	0.000498743	0.00374215	N
chr21_36206707_36231875	38.6332	1.5001	0.431828	3.47383	0.00051309	0.00384573	Y
chr1_219963690_219965397	6.23673	6.94708	2.0007	3.47233	0.000515959	0.00385907	Y
chr4_1102131_1105609	16.3355	-4.56172	1.31364	-3.47258	0.000515477	0.00385907	Y
chr16_66562897_66575856	8.24054	-6.78138	1.95439	-3.46981	0.000520818	0.00389131	Y
chr13_28748409_28771483	47.0357	1.19702	0.345016	3.46946	0.000521499	0.00389229	Y
chr16_85810161_85814886	9.17192	6.69378	1.93067	3.46708	0.000526155	0.0039229	Y
chr14_37969113_37969343	7.10688	-7.15092	2.06315	-3.46602	0.000528217	0.00393414	Y
chr20_57242546_57248767	9.14744	-6.45779	1.86354	-3.46534	0.000529558	0.00393998	Y
chr17_1746097_1756483	104.63	-0.682498	0.196986	-3.4647	0.000530819	0.00394373	N
chr20_35832288_35842268	32.6131	1.77954	0.513648	3.46452	0.000531175	0.00394373	Y
chr2_9490937_9499018	22.4704	3.52693	1.01877	3.46193	0.000536308	0.00397766	N
chr12_22637631_22643152	8.6078	-6.66302	1.92511	-3.46111	0.000537963	0.00398347	Y
chr17_11958206_12032604	14.4083	4.23227	1.22285	3.46098	0.000538216	0.00398347	Y
chr1_53351505_53358647	6.14859	-6.9421	2.00606	-3.46056	0.000539056	0.00398553	Y
chr13_47297356_47303119	8.37957	6.4878	1.87497	3.46022	0.00053973	0.00398635	Y
chr15_83301923_83310433	6.11027	-6.93329	2.00453	-3.45881	0.000542562	0.00400309	Y
chr7_76240771_76247617	7.31016	6.5534	1.89509	3.4581	0.000544001	0.00400953	Y
chr1_23397718_23398690	58.1171	-1.54145	0.446073	-3.45559	0.000549087	0.00403212	Y
chr17_19445706_19454781	6.12243	-6.93609	2.00728	-3.45547	0.000549343	0.00403212	Y
chr3_8784145_8794910	6.3494	-6.98883	2.02206	-3.45629	0.000547662	0.00403212	Y
chr6_30856465_30857207	21.7962	3.84235	1.11184	3.45583	0.000548599	0.00403212	Y
chr11_77090286_77091039	18.4614	-2.896	0.838529	-3.45367	0.000553021	0.00405492	Y
chr6_144858718_144860579	9.04109	-7.23757	2.09672	-3.45185	0.000556749	0.00407803	Y
chr21_44949638_44956941	5.63279	-6.42639	1.86193	-3.45148	0.000557526	0.0040795	NA
chr2_43732761_43755127	9.99166	6.55826	1.90137	3.44923	0.000562189	0.00410937	N
chr4_79158664_79173705	11.5911	6.29663	1.82668	3.44703	0.000566788	0.00413438	N
chr1_212957705_212960979	5.54891	-6.71233	1.94744	-3.44674	0.000567397	0.00413438	Y
chr13_101910794_101944717	6.4455	-7.01004	2.03397	-3.44648	0.000567945	0.00413438	Y
chr4_186168448_186209236	25.0357	2.33615	0.677674	3.4473	0.000566216	0.00413438	Y
chr12_104712691_104715094	6.13953	-6.94002	2.01426	-3.44544	0.000570128	0.00414601	Y
chr12_82763166_82796909	6.54442	-6.60721	1.91822	-3.44445	0.000572214	0.00415084	N
chr15_90414707_90432372	65.2652	-0.9695	0.28148	-3.4443	0.000572549	0.00415084	N
chr10_134421419_134511423	5.7092	-6.58639	1.91207	-3.44464	0.000571821	0.00415084	Y
chr13_52971367_52972329	34.5743	9.32063	2.70733	3.44274	0.000575847	0.00417047	Y
chr15_72810408_72848248	54.6865	-1.24917	0.36293	-3.4419	0.000577646	0.00417923	Y
chr15_35224519_35231014	7.58165	-6.5115	1.89236	-3.44094	0.000579702	0.00418983	Y
chr3_31617888_31621588	560.366	-0.397145	0.115604	-3.43539	0.000591703	0.0042722	N
chr7_73520205_73520573	16.8829	3.62375	1.05497	3.43493	0.000592709	0.00427511	Y
chr9_130285958_130294057	53.4859	-5.90696	1.71989	-3.4345	0.000593647	0.00427752	Y
chr15_59548483_59564648	32.9632	-9.26301	2.69939	-3.43151	0.000600222	0.0043205	Y
chr10_93870833_93952393	6.00998	-6.90946	2.01688	-3.42582	0.000612942	0.00440758	Y
chr11_77336008_77336863	113.414	-0.880381	0.257052	-3.42492	0.000614985	0.00441779	N
chr9_134888551_134889854	6.27771	-6.86262	2.00735	-3.41875	0.000629099	0.0045146	Y
chr9_78682871_78722267	8.67459	7.2037	2.1094	3.41504	0.000637719	0.00457182	Y
chr1_114372214_114377061	10.9286	6.58389	1.9296	3.41205	0.000644759	0.00461762	N
chr12_49317565_49319461	7.52997	-7.04745	2.06713	-3.40928	0.000651337	0.00466002	Y
chr22_18975270_18975708	26.7977	-2.29505	0.673297	-3.40867	0.000652801	0.00466578	Y
chr10_75848954_75984349	6.04023	-6.91654	2.02931	-3.40832	0.000653631	0.004667	Y
chr10_126631026_126631876	709.936	0.438002	0.128647	3.40469	0.000662391	0.00472293	N
chr12_79986391_79990438	6.05437	-6.91984	2.0327	-3.40426	0.000663444	0.00472293	Y
chrX_154645236_154651369	11.5066	-4.90811	1.44176	-3.40425	0.000663464	0.00472293	Y
chr1_21102217_21102498	24.6306	-3.62776	1.0658	-3.40378	0.000664604	0.0047263	N
chr4_42020128_42025401	5.87771	-6.87707	2.02174	-3.40156	0.000670018	0.00476002	Y
chr2_191765290_191789319	37.8621	1.36109	0.40023	3.40077	0.000671955	0.004769	Y
chr2_143676178_143685310	5.86272	-6.87347	2.02181	-3.39967	0.000674683	0.00478356	Y
chr11_120345269_120348235	82.7217	0.858224	0.252474	3.39926	0.000675674	0.0047858	N
chr14_69919958_69922583	7.64612	-6.53197	1.9224	-3.39782	0.000679245	0.00480629	Y
chr9_123583117_123583742	6.54173	-6.89041	2.02824	-3.39724	0.000680702	0.00481179	Y
chr10_123549684_123629553	9.53936	-7.23935	2.13383	-3.39265	0.00069219	0.00488812	Y
chr4_184749331_184751143	5.77085	-6.85069	2.01982	-3.39173	0.000694534	0.00489979	Y
chr21_33331155_33347029	7.91658	7.08136	2.08836	3.39086	0.000696732	0.0049104	Y
chr11_65269792_65272066	5.75349	-6.84645	2.02064	-3.38825	0.000703401	0.00495247	Y
chr3_11399892_11468400	135.87	-0.839543	0.24787	-3.38703	0.000706543	0.00496966	N
chr9_36597219_36643080	35.4676	1.38649	0.409434	3.38636	0.000708263	0.00497681	Y
chr12_133768075_133768589	6.97696	-6.95751	2.05544	-3.38492	0.000711991	0.00499805	Y
chr20_18491466_18492926	7.87003	-6.46747	1.91325	-3.38036	0.000723918	0.00507674	Y
chr12_98989211_98989439	6.57555	-6.42707	1.90169	-3.37966	0.000725757	0.00508461	Y
chr1_247322308_247323097	5.29156	-6.63956	1.96846	-3.37297	0.000743618	0.00519901	Y
chr10_126776760_126811437	5.8973	-6.88177	2.04019	-3.37309	0.000743286	0.00519901	Y
chr6_7861684_7862731	6.00318	-6.90737	2.04801	-3.37272	0.000744288	0.00519901	Y
chr5_167995651_167996003	5.80582	-6.8592	2.03416	-3.372	0.000746243	0.00520753	Y
chr2_182786675_182793005	26.7145	3.78153	1.12195	3.37051	0.000750295	0.00522124	N
chr5_1494815_1501718	6.19003	-6.40176	1.89937	-3.37046	0.000750419	0.00522124	Y
chr9_128305338_128322088	6.86869	-6.93583	2.05774	-3.37061	0.000750021	0.00522124	Y
chr6_45399600_45410930	5.77574	6.83588	2.02925	3.36867	0.00075533	0.00525025	Y
chr11_103182607_103194718	5.68482	-6.82899	2.02749	-3.3682	0.000756619	0.00525405	Y
chr14_50120708_50122529	5.93035	-6.36391	1.88976	-3.36757	0.000758335	0.00525566	Y
chr17_15843339_15843741	6.29996	-6.97692	2.07177	-3.36762	0.000758204	0.00525566	Y
chr5_54941617_54960691	5.66077	-6.82302	2.02651	-3.36688	0.000760227	0.00526362	Y
chr15_62221700_62223458	5.48885	-6.36832	1.89183	-3.36623	0.000762036	0.005271	Y
chr19_34921481_34929671	114.863	0.977233	0.29061	3.3627	0.000771837	0.00532838	N
chr10_12257739_12280484	55.2486	-1.18924	0.353649	-3.36277	0.000771659	0.00532838	Y
chr3_196842798_196846401	472.23	0.433902	0.129087	3.36131	0.000775751	0.00534526	N
chr11_122953793_122955421	5.97465	-6.90065	2.05298	-3.36129	0.000775791	0.00534526	Y
chr15_35207239_35219339	35.43	-2.57251	0.766207	-3.35746	0.000786635	0.00541471	N
chr1_12359259_12368698	30.5319	1.85742	0.553329	3.3568	0.000788501	0.00542228	Y
chr6_64356432_64356700	9.37248	-7.20736	2.14751	-3.35614	0.000790372	0.00542988	Y
chr11_106810186_106810904	5.66609	-6.82434	2.03402	-3.3551	0.00079335	0.00543978	Y
chr9_123952832_123955697	5.67614	-6.82683	2.03461	-3.35535	0.000792646	0.00543978	Y
chr3_36524484_36527741	5.80595	-6.85923	2.04508	-3.35402	0.000796477	0.00545594	Y
chr2_81775742_81797537	7.63648	-7.04224	2.0999	-3.35361	0.000797636	0.0054586	Y
chr8_56879274_56882352	6.61718	-6.54469	1.95186	-3.35306	0.000799226	0.00546421	Y
chr1_180366651_180382606	100.211	-0.944366	0.281772	-3.35152	0.000803683	0.00548938	N
chr3_12343020_12353952	6.64568	-7.05449	2.10772	-3.34698	0.00081697	0.00557476	Y
chr6_53385576_53387325	4.50975	-5.76369	1.72253	-3.34606	0.000819676	0.00558784	N
chr1_53343354_53358647	5.61057	-6.80991	2.03597	-3.3448	0.000823421	0.00560259	Y
chr20_58755108_58755971	6.07462	6.90855	2.06539	3.34492	0.000823064	0.00560259	Y
chr1_35879573_35881315	35.0589	-1.46484	0.438241	-3.34255	0.000830123	0.00564277	Y
chr17_40990748_40991397	8.27587	-6.37663	1.9092	-3.33994	0.000837951	0.00569051	Y
chr5_56160561_56161804	124.491	0.600199	0.179847	3.33728	0.000846025	0.00573984	N
chr1_32381496_32385259	110.344	-1.03711	0.310982	-3.33494	0.000853165	0.00578275	Y
chr1_51253672_51267349	65.2907	-1.35055	0.405127	-3.33364	0.000857182	0.00580442	Y
chr19_10694282_10694746	5.76177	6.83296	2.05032	3.33263	0.000860299	0.00581643	Y
chr3_36570188_36576152	5.62036	-6.81237	2.0442	-3.33253	0.000860599	0.00581643	Y
chr7_38247048_38259261	15.0373	3.82407	1.14793	3.33127	0.000864496	0.0058372	N
chrX_54662668_54662860	8.27543	-5.46788	1.64156	-3.3309	0.000865661	0.0058395	N
chr15_66030045_66031213	7.31676	-7.03405	2.11248	-3.32975	0.000869239	0.00585301	Y
chrX_72797243_72804408	46.177	-1.26557	0.380083	-3.32973	0.000869316	0.00585301	Y
chr1_176050288_176105683	44.6556	1.34079	0.402829	3.32843	0.000873382	0.0058748	Y
chr7_550446_557127	13.3222	6.29279	1.89194	3.3261	0.000880714	0.0059185	N
chr1_21415631_21437876	52.3937	-2.48468	0.747247	-3.32511	0.000883825	0.00593378	N
chr12_122968007_122983410	13.6732	-4.7801	1.43827	-3.3235	0.000888939	0.00595682	Y
chr9_96232611_96238620	5.73657	-6.72237	2.02265	-3.32355	0.000888807	0.00595682	Y
chrX_76845304_76851255	6.52196	-6.38774	1.92253	-3.32257	0.000891918	0.00597113	Y
chr15_67004006_67009478	8.3838	-7.10614	2.13919	-3.32188	0.000894129	0.00598028	Y
chr11_77433733_77436744	8.07206	-7.07167	2.12924	-3.32123	0.000896232	0.00598869	Y
chr1_16116601_16123438	5.55489	-6.79587	2.04699	-3.31992	0.000900418	0.00599505	Y
chr13_25051839_25052414	28.1482	2.44283	0.735709	3.32038	0.000898943	0.00599505	Y
chr17_26490569_26499644	45.1416	1.44997	0.436713	3.3202	0.000899538	0.00599505	Y
chr3_195605124_195615477	12.9153	4.9745	1.49852	3.31962	0.000901416	0.00599505	Y
chr9_2652944_2668061	6.02597	-6.9132	2.08237	-3.31987	0.00090059	0.00599505	Y
chr15_72180345_72186119	5.67533	-6.70532	2.021	-3.31782	0.000907229	0.00602805	Y
chr11_82984690_82989872	6.80848	-6.35655	1.91628	-3.31714	0.000909456	0.00603718	Y
chr3_112968569_112969680	5.68367	6.81219	2.0541	3.31639	0.00091188	0.00604195	Y
chr3_129684544_129690951	7.38156	6.37433	1.92196	3.31657	0.000911293	0.00604195	Y
chr10_69966527_69970304	5.63349	-6.81621	2.05627	-3.31484	0.000916947	0.00606985	Y
chr8_6582391_6590171	23.2012	-2.88386	0.871259	-3.30999	0.000932977	0.00617019	Y
chr14_104433046_104436958	5.39337	-6.75317	2.0404	-3.30973	0.000933861	0.00617028	Y
chr6_7845373_7862731	5.46663	-6.77274	2.04892	-3.30552	0.000948004	0.00625789	Y
chr12_11181000_11273779	5.9687	-6.89971	2.08784	-3.30471	0.000950756	0.00626438	Y
chr7_90355881_90419967	5.38804	-6.75177	2.04292	-3.30496	0.000949892	0.00626438	Y
chr2_27430507_27435014	5.68806	6.69216	2.02544	3.30405	0.000952992	0.00627328	Y
chrX_130917915_130919286	8.47861	-5.70763	1.72772	-3.30356	0.00095464	0.00627513	N
chr12_20766377_20774345	5.57474	-6.80088	2.05872	-3.30345	0.000955045	0.00627513	Y
chr6_87920169_87928449	97.7769	0.789827	0.239161	3.3025	0.000958279	0.00629053	N
chr11_61205097_61205585	63.9425	1.13559	0.343898	3.3021	0.000959639	0.00629363	Y
chr1_235582732_235597595	5.53408	-6.79001	2.05672	-3.30138	0.000962097	0.00630392	Y
chrX_130498723_130503026	5.42163	-6.76052	2.04828	-3.30059	0.000964807	0.00631583	Y
chr19_37696857_37698156	5.38035	-6.74976	2.04529	-3.30014	0.000966355	0.00632012	Y
chr1_23107914_23111569	13.5055	5.67679	1.72089	3.29875	0.00097118	0.00634582	N
chr4_114452372_114469885	5.7489	-6.84531	2.07556	-3.29806	0.000973566	0.00635555	Y
chr14_50136242_50141145	54.4179	-2.39045	0.724963	-3.29734	0.000976062	0.00636597	N
chr14_74203701_74204000	5.43478	-6.76393	2.05274	-3.29507	0.000983955	0.0064087	N
chr10_28223939_28225809	6.20485	-6.95541	2.11094	-3.29494	0.000984423	0.0064087	Y
chr12_64803742_64810534	6.12133	-6.93539	2.10567	-3.29367	0.000988882	0.00643182	Y
chr13_114164553_114188555	5.63028	-6.81486	2.06951	-3.29298	0.000991321	0.00643586	N
chr1_21327692_21329301	33.4712	-2.36032	0.716741	-3.29313	0.000990789	0.00643586	Y
chr4_186180002_186188309	10.0703	5.14588	1.56298	3.29234	0.000993571	0.00644457	Y
chr1_1986880_1991030	10.687	5.98757	1.8191	3.2915	0.00099655	0.00645797	N
chrX_6624384_6685752	5.33561	-6.7374	2.0507	-3.28542	0.00101832	0.00659299	Y
chr10_7262373_7318951	5.29518	-6.72671	2.04797	-3.28457	0.00102138	0.00660678	Y
chrX_134679348_134690225	6.29064	6.95803	2.1189	3.28379	0.00102422	0.00661913	Y
chr17_57161363_57165768	5.33995	-6.73855	2.05332	-3.28178	0.00103153	0.00665938	Y
chr21_16386665_16415891	5.22539	-6.70742	2.04397	-3.28156	0.00103233	0.00665938	Y
chr19_48229069_48229481	5.2275	-6.70798	2.04533	-3.27966	0.00103932	0.00669834	Y
chr5_78324256_78329231	5.5332	-6.79035	2.07078	-3.27913	0.00104128	0.00670493	Y
chr1_193044950_193046180	6.47569	-6.34485	1.93605	-3.27721	0.00104837	0.00674441	Y
chr16_23424769_23428442	5.74041	-6.29699	1.92262	-3.27521	0.00105585	0.00678637	Y
chr5_21491430_21501935	46.1168	-2.33175	0.712016	-3.27486	0.00105713	0.00678845	Y
chr4_148827789_148834329	6.33379	-6.81017	2.08021	-3.27379	0.00106114	0.00680801	Y
chr19_1738954_1740327	9.67878	-5.58892	1.7073	-3.27353	0.00106212	0.00680811	N
chr9_33115989_33135422	5.45125	-6.76877	2.06884	-3.27178	0.00106874	0.00684436	Y
chr3_185638892_185641772	26.7069	1.61393	0.493576	3.26986	0.00107599	0.00688458	Y
chr13_83637349_83676411	5.21238	-6.70391	2.05083	-3.26887	0.00107978	0.00689641	Y
chr3_4490950_4494733	5.53352	-6.66525	2.03901	-3.26887	0.00107978	0.00689641	Y
chr2_44190727_44202356	18.5147	2.67983	0.819981	3.26816	0.00108249	0.00690122	Y
chrX_1404671_1409402	44.2895	-6.28474	1.92293	-3.26831	0.00108193	0.00690122	Y
chr9_133469030_133470975	5.2461	-6.71298	2.0551	-3.2665	0.00108885	0.00693556	Y
chr1_179959642_179961356	6.72919	-6.4848	1.98576	-3.26565	0.00109214	0.006944	Y
chr9_126319849_126345549	5.36187	-6.74492	2.06534	-3.26576	0.0010917	0.006944	Y
chr2_190593386_190609514	8.56869	7.05789	2.16164	3.26507	0.00109438	0.006952	Y
chr18_19395577_19399607	5.36076	-6.74462	2.06621	-3.26425	0.00109756	0.00696594	Y
chr12_49854553_49884514	28.738	-1.55699	0.477216	-3.26266	0.00110373	0.00699883	Y
chr20_33969721_33971936	6.98674	-5.62151	1.72327	-3.26211	0.00110585	0.00700256	N
chr2_234678177_234681224	5.14023	-6.68366	2.04911	-3.26175	0.00110728	0.00700256	Y
chr21_46540709_46554747	5.12932	-6.68068	2.04813	-3.26184	0.00110692	0.00700256	Y
chr7_65751498_65751696	38.8203	-2.8572	0.876075	-3.26136	0.00110879	0.00700586	Y
chr12_112518864_112530940	4.81815	-6.12001	1.87671	-3.26103	0.00111008	0.00700776	Y
chr10_134218130_134219793	5.13826	-6.24011	1.91381	-3.26057	0.0011119	0.00701298	Y
chr3_149540305_149570383	7.42733	-6.96148	2.13632	-3.25863	0.00111953	0.00704857	Y
chr6_86227474_86239993	67.396	1.06611	0.327147	3.2588	0.00111884	0.00704857	Y
chr1_246670356_246835919	5.1282	-6.68037	2.05067	-3.25765	0.00112338	0.00705956	Y
chr17_9757812_9760893	5.14457	-6.68485	2.05212	-3.25754	0.00112383	0.00705956	Y
chr8_41905896_41907225	5.04431	-6.20148	1.9038	-3.25743	0.00112427	0.00705956	Y
chr3_141811903_141820683	24.4506	-1.56237	0.479676	-3.25714	0.0011254	0.00706038	Y
chr8_126687870_126692273	5.1991	6.68378	2.05234	3.25666	0.00112733	0.00706624	Y
chr2_143642918_143643105	5.14792	-6.68576	2.05408	-3.25487	0.00113442	0.00708875	N
chr9_134312007_134314448	113.769	-0.671708	0.206365	-3.25495	0.00113411	0.00708875	N
chr1_227381487_227400920	21.0658	-1.91713	0.589033	-3.25472	0.00113506	0.00708875	Y
chr10_12856194_12858327	5.13254	-6.68156	2.05273	-3.25496	0.00113407	0.00708875	Y
chrX_131516206_131526362	5.40453	-6.75607	2.07592	-3.2545	0.00113592	0.00708875	Y
chr5_137027974_137045545	5.3299	-6.7359	2.07026	-3.25366	0.00113931	0.00710361	Y
chr2_61749746_61761038	616.719	-0.710955	0.218548	-3.25309	0.00114157	0.00711145	N
chr12_12788711_12788908	16.8269	-3.52212	1.08321	-3.25154	0.00114782	0.0071441	N
chr1_224553581_224567357	5.31898	-6.73302	2.07326	-3.24756	0.001164	0.00723848	Y
chr10_75506388_75506762	5.85098	-6.71152	2.06782	-3.24571	0.0011716	0.00727933	Y
chr1_52956404_52975384	5.15015	-6.68637	2.06101	-3.24423	0.0011777	0.00731082	Y
chrX_21896160_21896810	4.80173	-6.49259	2.0015	-3.24386	0.00117924	0.00731396	Y
chr1_245006437_245012158	4.4177	-6.36206	1.96335	-3.24041	0.00119359	0.00739649	Y
chr10_74474869_74475660	53.2921	-4.58191	1.41541	-3.23717	0.00120722	0.0074744	Y
chr4_123949341_124011860	5.10749	-6.67468	2.06319	-3.23512	0.0012159	0.00752158	Y
chr14_76633006_76662315	41.22	1.44892	0.448049	3.23383	0.0012214	0.00754285	Y
chr4_140046318_140060651	40.1634	-1.79279	0.554389	-3.23382	0.00122147	0.00754285	Y
chr14_51101932_51111732	6.57609	-6.82761	2.11383	-3.22997	0.00123802	0.00763178	Y
chr3_168027093_168031964	5.46787	-6.77305	2.09684	-3.23013	0.00123735	0.00763178	Y
chr3_6759256_6774182	4.94932	-6.62911	2.05315	-3.22875	0.00124331	0.00765769	Y
chr14_35276657_35331528	5.39535	-6.75368	2.09202	-3.22831	0.00124524	0.00766293	Y
chr12_8808011_8808426	5.43564	-6.76417	2.0959	-3.22733	0.0012495	0.0076775	Y
chrX_18264697_18266002	7.85096	-6.98298	2.16374	-3.22727	0.00124978	0.0076775	Y
chr17_54985829_54986238	18.5667	3.05672	0.947388	3.22648	0.00125325	0.00767887	N
chr12_27199087_27219830	8.68357	6.15154	1.90631	3.22693	0.00125127	0.00767887	Y
chr21_27269885_27284274	25.8321	1.67859	0.520228	3.22664	0.00125251	0.00767887	Y
chr9_33624261_33624419	5.36387	-6.74486	2.09255	-3.22327	0.00126735	0.0077393	N
chr1_63944435_63974241	6.37212	-6.80958	2.11279	-3.22304	0.00126839	0.0077393	Y
chr14_100826891_100828258	4.75632	-6.08541	1.88812	-3.223	0.00126858	0.0077393	Y
chr4_1902353_1906105	80.0585	1.26593	0.392689	3.22376	0.0012652	0.0077393	Y
chr9_137716446_137717750	5.26592	-6.7189	2.08435	-3.2235	0.00126634	0.0077393	Y
chr13_80094945_80122529	5.35464	-6.61344	2.05223	-3.22257	0.00127048	0.00774155	Y
chr2_135099161_135119979	5.2063	6.68572	2.07475	3.22242	0.00127113	0.00774155	Y
chr9_94058303_94118437	5.22775	-6.70805	2.0827	-3.22084	0.00127816	0.00777764	Y
chr11_57258697_57259335	34.626	6.42702	1.99637	3.21936	0.00128478	0.00781123	N
chr22_47287162_47325531	7.2384	-6.3416	1.9703	-3.21859	0.00128822	0.00782026	Y
chrX_16171143_16177818	5.73734	6.82643	2.12097	3.21854	0.00128847	0.00782026	Y
chr8_145737775_145738154	23.9809	2.32826	0.723516	3.21797	0.001291	0.0078289	Y
chr7_131058469_131084192	6.63692	-6.26149	1.94608	-3.21748	0.00129321	0.0078356	N
chr8_144547887_144557755	8.05147	-6.3642	1.97844	-3.21677	0.00129641	0.00784827	N
chr1_33276192_33276658	4.26346	-6.00347	1.86838	-3.21319	0.0013127	0.00793332	Y
chr10_27821436_27822923	16.5091	-2.7089	0.84305	-3.21322	0.00131258	0.00793332	Y
chr15_44134613_44136252	7.07373	-6.47843	2.0177	-3.2108	0.00132365	0.00798588	Y
chr7_98984308_98985884	4.94143	6.61098	2.05888	3.21095	0.00132295	0.00798588	Y
chr13_28155434_28155940	19.7265	2.22772	0.69394	3.21025	0.0013262	0.00799447	Y
chr5_151166164_151175136	9.73279	4.30409	1.34103	3.20955	0.00132945	0.00800723	Y
chr15_65804633_65808129	6.10195	-6.27979	1.95702	-3.20885	0.00133268	0.00801987	Y
chr12_111855923_111856681	19.404	3.43244	1.0705	3.20638	0.00134417	0.00808212	N
chr7_99952766_99953427	137.739	1.17498	0.366507	3.20587	0.00134653	0.00808947	Y
chr2_29124853_29137074	6.38948	6.20993	1.93808	3.20417	0.00135453	0.00813063	Y
chr14_89041037_89044484	33.1065	2.04189	0.637461	3.20315	0.00135932	0.00815247	Y
chr8_119388021_119391939	5.05965	-6.66079	2.08019	-3.20202	0.0013647	0.00817779	Y
chr12_116668338_116675510	318.183	0.570205	0.178094	3.2017	0.0013662	0.00817989	N
chr13_60485869_60490383	4.87295	-6.60656	2.06379	-3.20118	0.00136865	0.00818716	Y
chr14_31849673_31856581	6.64297	-6.84002	2.13687	-3.20096	0.00136973	0.00818716	Y
chr11_122646927_122647918	5.64013	6.63939	2.07584	3.19841	0.00138187	0.00825276	Y
chr6_151198770_151209117	27.5402	-2.36394	0.739269	-3.19767	0.00138542	0.00826698	N
chr5_127854966_127863660	4.9177	-6.62011	2.07075	-3.19696	0.00138887	0.00828058	Y
chr5_170305101_170308900	33.7053	-3.16371	0.990075	-3.19543	0.00139623	0.00831747	N
chr1_225140372_225195246	41.8027	-2.2481	0.703735	-3.19453	0.0014006	0.0083365	N
chr11_118484009_118484611	5.18666	6.67984	2.09146	3.19386	0.00140383	0.00834872	Y
chr14_93730131_93730339	6.27441	-6.97156	2.18356	-3.19275	0.00140925	0.00837394	Y
chrX_77084528_77086392	5.64908	-6.31847	1.97919	-3.19244	0.00141074	0.00837578	Y
chr15_71534988_71549054	4.76931	-6.57564	2.05993	-3.19217	0.00141207	0.00837661	Y
chr1_65016277_65068595	12.7892	5.65331	1.77152	3.19122	0.00141673	0.00838153	N
chr7_6472420_6476164	5.0493	-6.52078	2.04347	-3.19104	0.00141763	0.00838153	N
chr13_80094945_80113910	34.0606	-1.96339	0.615256	-3.19117	0.00141696	0.00838153	Y
chr17_50679133_50850712	5.00385	-6.64519	2.08245	-3.19105	0.00141757	0.00838153	Y
chr16_15577794_15609285	4.97535	-6.63649	2.08119	-3.1888	0.00142867	0.00843975	Y
chr1_61743192_61849037	4.75183	-6.57048	2.06084	-3.18825	0.00143137	0.00844162	Y
chr15_33149216_33194241	9.0252	7.03518	2.20653	3.18834	0.00143091	0.00844162	Y
chr17_76823327_76825089	6.86831	-6.12128	1.92019	-3.18785	0.00143334	0.00844622	Y
chr13_43639822_43659974	8.3639	6.26394	1.96652	3.18528	0.00144612	0.0085092	N
chr7_2405952_2409317	9.60709	4.04924	1.27126	3.18522	0.00144643	0.0085092	Y
chr13_48562676_48571158	5.18907	6.68048	2.09868	3.18318	0.00145667	0.00856232	Y
chr4_41496553_41601043	4.92414	-6.62195	2.08051	-3.18285	0.00145835	0.00856508	Y
chr17_11958206_11984847	5.08247	-6.66712	2.09633	-3.18038	0.00147084	0.00862416	Y
chr7_8095063_8110761	5.08247	-6.66712	2.09633	-3.18038	0.00147084	0.00862416	Y
chr2_169547544_169574488	53.1335	0.991857	0.311899	3.18006	0.00147245	0.00862641	N
chr17_80721841_80739597	59.6201	1.05339	0.331328	3.1793	0.00147634	0.00864206	Y
chr11_118997645_118997835	9.04878	-6.06748	1.90864	-3.17895	0.00147811	0.00864527	N
chr19_35749848_35750724	8.77959	6.42641	2.02196	3.1783	0.0014814	0.00865027	N
chr11_118454524_118455359	21.3399	1.98687	0.62511	3.17843	0.00148073	0.00865027	Y
chr3_33863447_33870461	4.67001	-6.54535	2.05979	-3.17767	0.00148464	0.00866203	Y
chr22_46493806_46505788	4.83489	-6.59554	2.07601	-3.17703	0.00148792	0.00866845	Y
chr9_74354979_74355148	4.74204	-6.56759	2.06724	-3.17698	0.00148819	0.00866845	Y
chr16_53301206_53302038	7.69692	-6.33974	1.99618	-3.17594	0.00149354	0.00869246	Y
chr5_93410351_93413070	5.34244	6.72431	2.11755	3.17552	0.00149569	0.00869785	N
chr9_36599391_36607670	6.83523	6.41427	2.02066	3.17434	0.00150177	0.00872606	N
chr5_72157635_72173173	4.73881	-6.56663	2.07124	-3.17039	0.00152235	0.00883834	Y
chr22_29025540_29029962	4.90356	-6.61606	2.08788	-3.16879	0.00153075	0.00887984	Y
chr17_42231924_42232779	80.2406	0.796054	0.25132	3.1675	0.00153758	0.00889668	N
chr2_122260743_122287901	118.491	0.756875	0.238937	3.16767	0.00153665	0.00889668	N
chr12_21028169_21054401	5.27983	-6.72203	2.12208	-3.16766	0.00153669	0.00889668	Y
chr7_98985662_98985884	7.34714	6.95587	2.19616	3.16729	0.00153867	0.00889668	Y
chr10_60549022_60553375	4.65476	-6.54076	2.06576	-3.16627	0.00154406	0.00892054	Y
chr22_34157358_34252790	7.02288	6.9154	2.18455	3.16559	0.00154768	0.00893413	Y
chr12_11273609_11285966	11.3863	-5.66559	1.78989	-3.16533	0.00154909	0.00893502	N
chr5_107521818_107563302	3.97141	-6.19618	1.95932	-3.16242	0.00156464	0.00901737	Y
chr10_74468041_74501603	4.88696	-6.6106	2.09065	-3.16199	0.00156694	0.0090233	Y
chr21_45012106_45033828	4.99185	-6.64115	2.10075	-3.16133	0.00157051	0.00903648	Y
chr6_128540067_128563747	6.15771	-6.28703	1.98909	-3.16076	0.00157359	0.00904686	Y
chr14_35044962_35078948	4.5903	-6.52041	2.06368	-3.15959	0.00157989	0.00906838	Y
chr2_214174783_214182080	4.5903	-6.52041	2.06368	-3.15959	0.00157989	0.00906838	Y
chr2_24786773_24807429	45.4042	1.74344	0.551845	3.1593	0.00158151	0.00907031	Y
chr1_213415912_213436159	4.58373	-6.5184	2.06428	-3.15771	0.00159015	0.00911246	Y
chr2_234296903_234299129	128.241	0.829321	0.262683	3.15712	0.00159338	0.00912361	N
chr7_2311485_2317940	5.31079	6.71542	2.12735	3.15672	0.00159557	0.00912876	Y
chr1_225270251_225284941	5.61592	-6.12951	1.9421	-3.15613	0.00159878	0.00913236	Y
chr22_46114293_46136418	7.92134	-6.98462	2.2129	-3.15632	0.00159771	0.00913236	Y
chr2_240929491_240954277	21.3969	-2.68814	0.852069	-3.15484	0.00160586	0.00916545	Y
chr3_157839892_157841780	406.159	0.384864	0.122067	3.15289	0.00161663	0.00921589	N
chr10_97250792_97253043	4.5965	6.50647	2.06373	3.15277	0.0016173	0.00921589	Y
chr14_69670634_69676918	4.96378	-6.00023	1.90381	-3.15169	0.00162326	0.00924241	Y
chr7_73770740_73774608	4.62529	6.51525	2.06738	3.15145	0.00162462	0.0092427	Y
chr5_170640623_170669824	4.56848	-6.51372	2.06786	-3.14999	0.00163278	0.00928168	Y
chr5_38991051_38996984	5.98296	-6.1529	1.95352	-3.14966	0.00163463	0.00928476	Y
chr11_85707869_85742653	4.87816	-6.60807	2.09935	-3.14767	0.00164579	0.00934064	Y
chr8_6335115_6357450	4.48778	-6.48791	2.06137	-3.14738	0.00164743	0.00934245	Y
chr2_38570410_38581319	8.41132	7.05688	2.24355	3.1454	0.00165859	0.00939823	Y
chr3_55038790_55052344	4.5598	-6.51106	2.07059	-3.14454	0.00166346	0.0094183	Y
chr7_77026299_77035422	4.7706	6.56084	2.08768	3.14264	0.00167429	0.00946623	N
chr5_138614016_138614818	67.7639	1.41716	0.450953	3.14259	0.0016746	0.00946623	Y
chr9_17551148_17555080	4.49001	-6.48861	2.06515	-3.14195	0.00167826	0.00947938	Y
chr1_21431610_21437876	4.86986	-6.60567	2.10382	-3.13984	0.00169041	0.0095404	Y
chr9_74838036_74842956	4.78035	-6.57888	2.09546	-3.13959	0.00169186	0.00954096	Y
chr13_22095384_22122056	4.5845	6.50281	2.07158	3.13906	0.00169492	0.0095506	Y
chr15_43707792_43708614	24.3103	-2.60293	0.829606	-3.13755	0.00170369	0.00959237	N
chr5_78415060_78419286	4.79969	-6.58457	2.09888	-3.13718	0.00170582	0.00959674	Y
chr12_65720606_65762806	45.4524	-1.42605	0.454729	-3.13605	0.00171238	0.00962604	Y
chr7_90376996_90419967	4.50849	-6.49437	2.07203	-3.1343	0.00172267	0.00967617	Y
chr13_42742576_42761284	8.29303	6.95499	2.21976	3.13322	0.00172903	0.00970419	Y
chr14_39562391_39565343	6.87134	-6.08944	1.94408	-3.1323	0.00173443	0.00972684	Y
chr12_5269473_5281055	5.28863	-6.72439	2.14712	-3.13181	0.0017373	0.00973517	Y
chr10_128923738_128926028	7.36864	-5.20641	1.66372	-3.12938	0.00175175	0.00980841	N
chr3_56661065_56662642	77.2131	0.867243	0.27722	3.12836	0.00175784	0.00982934	N
chr14_31775938_31778388	4.40919	-6.4623	2.06591	-3.12806	0.00175965	0.00982934	Y
chr5_87581558_87588460	4.61101	-6.52673	2.08641	-3.12821	0.00175875	0.00982934	Y
chr5_78338106_78340375	4.49311	-6.48958	2.07539	-3.12692	0.00176646	0.00985361	Y
chr7_128220053_128232071	25.7002	2.88833	0.923755	3.12672	0.00176766	0.00985361	Y
chr8_131370263_131415139	5.51893	6.77158	2.16577	3.12664	0.00176817	0.00985361	Y
chr4_151223777_151242520	4.50402	-6.49298	2.07685	-3.12636	0.00176983	0.00985509	Y
chr13_114174931_114193822	56.604	1.41367	0.452229	3.12602	0.00177192	0.00985902	N
chr15_67893023_67956983	4.38526	-6.45468	2.06547	-3.12504	0.00177784	0.00988417	Y
chr9_129154345_129184227	4.46596	-6.48108	2.07504	-3.12335	0.00178806	0.0099332	Y
chr8_131226802_131302384	4.67657	6.53217	2.09243	3.12181	0.0017974	0.00997728	Y
chr9_102988344_102992109	7.38584	-6.04961	1.93831	-3.12108	0.00180191	0.00999448	Y
chr22_30384469_30387659	18.6968	-4.26238	1.36642	-3.11938	0.0018123	0.0100442	Y
chr11_65202524_65205128	6.2598	-6.22288	1.99564	-3.11824	0.00181932	0.0100684	Y
chrX_19560043_19564168	4.60807	6.50926	2.0875	3.11821	0.0018195	0.0100684	Y
chr1_94953098_94956803	58.2089	-1.6179	0.51925	-3.11584	0.00183421	0.010118	N
chr11_103173822_103182762	4.41688	-6.46474	2.07501	-3.11553	0.00183615	0.010118	Y
chr16_56900985_56902284	4.72146	-6.56146	2.10615	-3.11539	0.00183705	0.010118	Y
chr17_60038228_60040332	7.47093	-6.07877	1.95095	-3.11579	0.0018345	0.010118	Y
chr6_165862416_165863850	4.56079	-6.51136	2.08949	-3.11625	0.00183168	0.010118	Y
chrX_67494580_67518938	4.41129	-6.46297	2.07421	-3.11587	0.00183406	0.010118	Y
chr20_34446224_34459751	4.80291	-6.58552	2.11455	-3.11438	0.00184334	0.0101448	N
chr4_151023630_151023964	87.7412	-4.51962	1.45155	-3.11366	0.00184783	0.0101539	Y
chr6_99887645_99913012	5.00851	-6.00442	1.92842	-3.11366	0.00184785	0.0101539	Y
chr21_17135210_17150346	4.4201	-6.46577	2.07679	-3.11335	0.00184979	0.0101566	Y
chr12_28378728_28460682	6.78103	-6.79722	2.1835	-3.11299	0.00185201	0.0101609	Y
chr4_169812073_169837178	5.49389	-6.78022	2.17925	-3.11126	0.0018629	0.0102128	Y
chr5_138145727_138163407	6.40347	6.76129	2.17401	3.11005	0.00187056	0.0102468	Y
chr3_170906491_170912424	22.0154	3.25574	1.04702	3.10954	0.00187379	0.0102549	N
chr12_72052410_72054207	5.01674	-6.6488	2.13832	-3.10936	0.00187493	0.0102549	Y
chr4_185637551_185638350	20.5158	2.49072	0.801194	3.10877	0.00187871	0.0102677	N
chr4_6925100_6925838	154.875	0.795889	0.25606	3.10822	0.0018822	0.010277	N
chr7_131060183_131084192	240.022	-0.722123	0.232374	-3.10759	0.00188623	0.010277	N
chr10_76349040_76360251	3.61228	-6.04729	1.94571	-3.10801	0.00188352	0.010277	Y
chr6_125366357_125379252	4.50861	-6.49441	2.08975	-3.10774	0.00188525	0.010277	Y
chr13_33315218_33320238	9.59325	-6.93702	2.23258	-3.10718	0.00188884	0.0102833	Y
chr3_169854207_169867032	64.6928	-1.35843	0.437308	-3.10634	0.0018942	0.0103046	Y
chr1_6007164_6012896	17.5892	-3.29548	1.06098	-3.10607	0.00189591	0.010306	N
chr19_5016268_5033042	3.5131	-6.00351	1.93343	-3.10511	0.0019021	0.0103317	Y
chr10_89527430_89536184	87.2188	-0.860142	0.277085	-3.10426	0.00190759	0.0103536	N
chr11_65271200_65272066	4.2117	-6.39633	2.06109	-3.10337	0.00191332	0.0103762	Y
chr7_99090663_99092254	18.4855	2.19306	0.706769	3.10293	0.00191615	0.0103762	Y
chrX_24080533_24086225	7.33798	-6.31924	2.03645	-3.10307	0.00191522	0.0103762	Y
chr3_141231005_141259451	48.7648	1.34538	0.433725	3.10191	0.00192279	0.0103963	Y
chr3_145820542_145842016	4.32625	-6.43482	2.07436	-3.10207	0.0019217	0.0103963	Y
chr21_46536848_46548488	4.71155	-6.55779	2.11437	-3.10153	0.00192525	0.0104016	Y
chr1_151611364_151641111	5.097	-6.48757	2.09242	-3.10051	0.00193185	0.0104214	Y
chr3_11849307_11858811	4.5479	-5.92448	1.91073	-3.10064	0.00193104	0.0104214	Y
chr9_74817487_74846097	4.41911	-6.46545	2.08551	-3.10018	0.00193404	0.0104253	Y
chr1_38052912_38054683	6.45752	-6.16543	1.98941	-3.09913	0.00194093	0.0104478	N
chr20_20634174_20661445	4.40497	-6.46096	2.08479	-3.09909	0.00194117	0.0104478	Y
chr18_19395577_19424214	4.62081	-6.52971	2.10831	-3.09714	0.001954	0.0105089	Y
chr2_179400459_179407088	9.36169	7.0708	2.28376	3.09612	0.00196072	0.0105263	N
chr1_247320134_247323115	3.6057	-6.04456	1.95223	-3.09623	0.00195998	0.0105263	Y
chr3_37939492_37953318	5.1176	6.47818	2.09246	3.09597	0.0019617	0.0105263	Y
chr13_79951514_79953042	7.0549	-6.16883	1.99349	-3.09449	0.00197152	0.010571	N
chr2_176844538_176859008	6.65001	-6.30477	2.03859	-3.09271	0.00198337	0.0106265	Y
chr3_12531283_12538053	9.57722	-6.92298	2.23879	-3.09228	0.00198625	0.0106339	Y
chr8_57876522_57892756	7.23775	-6.89149	2.22932	-3.0913	0.00199282	0.0106369	N
chr13_28840852_28845003	21.7721	1.76728	0.571627	3.09168	0.0019903	0.0106369	Y
chr4_186168448_186231970	4.3288	6.41988	2.07664	3.09147	0.00199166	0.0106369	Y
chr9_74825603_74846097	4.31633	-6.43161	2.08017	-3.09186	0.00198905	0.0106369	Y
chr9_136699394_136804341	6.70591	-6.77751	2.19357	-3.08971	0.0020035	0.0106761	N
chr1_244715624_244724447	4.19645	-6.39126	2.06883	-3.08931	0.00200619	0.0106761	Y
chr12_64456697_64458999	4.58944	-6.52014	2.1105	-3.08938	0.00200578	0.0106761	Y
chr17_41576230_41577471	52.578	1.0729	0.347272	3.08951	0.00200486	0.0106761	Y
chr15_43120126_43132631	201.059	-0.617178	0.19984	-3.08837	0.0020126	0.0107021	N
chr2_148653870_148657136	3.52647	-6.01189	1.94894	-3.08469	0.00203765	0.0107905	N
chr1_91356594_91383711	4.91325	-6.61818	2.14556	-3.08458	0.00203837	0.0107905	Y
chr15_55619729_55626205	4.41885	-6.46538	2.09561	-3.0852	0.00203418	0.0107905	Y
chr16_22360600_22361170	5.42287	-6.05045	1.96081	-3.08569	0.00203082	0.0107905	Y
chr7_138711454_138719424	4.95933	-6.04285	1.95897	-3.08471	0.00203751	0.0107905	Y
chrX_6685548_6701543	4.39269	-6.45705	2.09331	-3.08461	0.00203819	0.0107905	Y
chr11_122162992_122165713	6.3567	-6.72493	2.1808	-3.0837	0.00204445	0.0108088	Y
chrX_22231021_22263526	4.32724	-6.43514	2.08687	-3.08364	0.00204486	0.0108088	Y
chr6_135621638_135644462	6.62056	-6.80075	2.20603	-3.08279	0.00205068	0.0108314	Y
chr6_57046830_57048709	4.21815	-6.39847	2.0762	-3.08182	0.00205737	0.0108587	Y
chr1_35569896_35570370	4.57548	-6.36381	2.06521	-3.08143	0.00206007	0.0108649	Y
chr15_44671888_44673174	5.95645	-6.69879	2.17413	-3.08114	0.00206212	0.0108676	Y
chrX_44894176_44913200	4.29042	-6.42317	2.08536	-3.08012	0.00206918	0.0108967	Y
chr10_52220433_52350007	4.80502	-6.58614	2.13854	-3.07974	0.00207184	0.0109026	Y
chr19_1147308_1154401	30.8184	-2.15916	0.701226	-3.07913	0.00207607	0.0109167	Y
chr15_51855578_51868378	5.40879	-6.58422	2.13978	-3.07705	0.00209059	0.0109849	Y
chr6_74149932_74150168	4.21269	-6.39666	2.07917	-3.07654	0.00209416	0.0109955	Y
chr8_54723724_54742093	4.90798	-5.95258	1.93698	-3.07313	0.00211827	0.0111139	Y
chr8_18622959_18662408	164.784	-0.612147	0.199267	-3.07199	0.00212635	0.0111315	N
chr2_156666440_156669306	5.72221	6.03278	1.96369	3.07216	0.00212514	0.0111315	Y
chr6_56716195_56765419	4.35798	-6.44593	2.09807	-3.07231	0.00212412	0.0111315	Y
chr10_96201653_96204296	4.2029	-6.3934	2.08215	-3.07057	0.00213648	0.0111411	N
chr1_28337458_28343750	4.40175	-6.45993	2.10377	-3.07065	0.00213596	0.0111411	Y
chr11_106680719_106681204	4.12344	-6.36574	2.07263	-3.07133	0.00213104	0.0111411	Y
chr2_109964130_109988137	4.66864	-6.54493	2.13161	-3.07042	0.00213761	0.0111411	Y
chr9_99324975_99327765	4.14402	-6.3727	2.0754	-3.07059	0.0021364	0.0111411	Y
chrX_9469820_9520565	4.02848	-6.33216	2.06184	-3.07112	0.0021326	0.0111411	Y
chr5_108219097_108295048	4.81271	-6.5884	2.14607	-3.06998	0.00214075	0.0111492	Y
chr16_29917109_29917448	61.0252	5.03834	1.64191	3.0686	0.00215068	0.0111927	Y
chr14_50074118_50074839	4.04373	-6.33744	2.06681	-3.0663	0.00216727	0.0112673	Y
chr17_26685939_26687870	4.18343	-6.3869	2.0831	-3.06606	0.00216901	0.0112673	Y
chr5_79974746_80048075	3.93674	-6.29893	2.05448	-3.06595	0.00216979	0.0112673	Y
chr1_1192372_1192690	74.8244	1.22228	0.398828	3.06468	0.00217902	0.0112964	Y
chr17_994905_1003975	22.3841	2.36854	0.772796	3.06489	0.0021775	0.0112964	Y
chr7_135635347_135661850	4.91155	-6.42669	2.09713	-3.06452	0.00218017	0.0112964	Y
chr5_72370569_72373320	136.63	-1.0037	0.32771	-3.06277	0.00219298	0.0113545	Y
chr2_15534351_15557836	5.13004	6.48277	2.11733	3.06176	0.0022004	0.0113845	Y
chr12_12992008_12999533	3.93562	-6.29854	2.05768	-3.06099	0.00220607	0.0114055	Y
chr9_134381501_134381840	13.7369	3.911	1.27842	3.05926	0.00221888	0.0114634	Y
chr11_6344815_6345265	3.94988	-6.30358	2.06103	-3.05846	0.00222474	0.0114853	Y
chr1_41474466_41475926	41.1523	-2.3031	0.75313	-3.05803	0.00222795	0.0114935	N
chr4_115299603_115315470	3.93996	-6.30008	2.06038	-3.05773	0.00223021	0.0114968	Y
chr10_28420489_28438988	4.22931	-6.40217	2.09626	-3.05409	0.00225743	0.0116202	Y
chr22_24002052_24026054	3.85381	-6.26811	2.05226	-3.05424	0.00225631	0.0116202	Y
chr22_50563821_50566936	4.13955	-6.3712	2.08673	-3.0532	0.00226416	0.0116387	Y
chr7_43436413_43447330	4.13981	-6.37128	2.08677	-3.05318	0.00226431	0.0116387	Y
chr10_70945743_70951522	5.00073	-6.06137	1.98595	-3.05213	0.00227226	0.0116711	Y
chr7_550446_552092	9.60268	5.81055	1.90447	3.05101	0.00228071	0.0116837	N
chr17_19445706_19451446	3.95745	-6.30626	2.06686	-3.05113	0.00227983	0.0116837	Y
chr17_78614243_78617610	4.36008	-6.4466	2.11292	-3.05103	0.00228057	0.0116837	Y
chr6_158994452_159010814	146.951	-1.12152	0.367628	-3.05068	0.00228325	0.0116837	Y
chr6_20758826_20781496	4.43157	-6.02214	1.97415	-3.0505	0.00228461	0.0116837	Y
chr7_618893_647089	3.97187	6.2957	2.06368	3.05071	0.002283	0.0116837	Y
chr3_4418014_4461823	4.09728	-6.35684	2.08403	-3.05026	0.00228645	0.0116846	Y
chr11_14793483_14810788	66.7853	-1.20984	0.396767	-3.04925	0.00229414	0.0117047	N
chr11_12696956_12785981	7.7523	-6.82271	2.23762	-3.04909	0.00229533	0.0117047	Y
chr12_123983091_123984083	3.8517	-6.26734	2.05524	-3.04944	0.00229266	0.0117047	Y
chr3_195250490_195251694	3.86823	6.25773	2.05266	3.0486	0.00229911	0.0117156	Y
chr13_75930283_75936743	4.56334	6.49698	2.1318	3.04765	0.00230635	0.0117187	Y
chr2_32142995_32181667	4.05675	-6.34194	2.08088	-3.04772	0.00230588	0.0117187	Y
chr2_69297779_69304620	3.86038	-6.27048	2.05706	-3.04828	0.00230155	0.0117187	Y
chrX_62885766_62898452	7.60594	-6.08552	1.99661	-3.04793	0.00230425	0.0117187	Y
chr1_21076216_21076468	4.28471	-6.4213	2.10765	-3.04667	0.00231392	0.011735	Y
chr10_105106995_105108756	5.1339	-5.91911	1.9427	-3.04685	0.00231254	0.011735	Y
chr7_48033912_48035743	4.18008	-6.38578	2.09604	-3.04659	0.00231453	0.011735	Y
chr1_109884636_109888503	23.2043	2.37619	0.780095	3.04602	0.00231891	0.0117488	Y
chr1_179271812_179276351	3.85157	-6.2673	2.05818	-3.04508	0.00232622	0.011769	Y
chr5_37605166_37605340	3.85157	-6.2673	2.05818	-3.04508	0.00232622	0.011769	Y
chr1_21599192_21616649	20.0628	-3.4428	1.1308	-3.04458	0.00233005	0.01178	N
chr5_24060288_24062089	3.85716	-6.26932	2.05934	-3.04434	0.00233193	0.0117811	Y
chr22_30366965_30375041	17.5519	-4.58538	1.50642	-3.04389	0.00233544	0.011782	Y
chr9_125617463_125618157	4.6882	-5.99461	1.96934	-3.04398	0.00233474	0.011782	Y
chr1_220771673_220792097	3.76219	-6.23339	2.04829	-3.04321	0.00234068	0.0117939	Y
chr6_166316145_166324420	4.15381	-6.37601	2.0952	-3.04315	0.00234112	0.0117939	Y
chr13_108269565_108287727	3.95212	-6.30437	2.07353	-3.04041	0.00236257	0.0118897	Y
chr2_159922408_159954346	71.2409	-1.01178	0.33279	-3.04029	0.0023635	0.0118897	Y
chr17_49091593_49133843	3.96179	-6.30779	2.07514	-3.0397	0.00236816	0.0119047	N
chr1_61553821_61743257	4.69641	-6.55395	2.15692	-3.03857	0.00237707	0.011941	Y
chr4_7795408_7811490	3.91603	-6.29157	2.07106	-3.03785	0.00238271	0.0119608	N
chr22_46493806_46494438	6.70076	-6.01372	1.97994	-3.03732	0.00238689	0.0119648	N
chr12_514677_527802	3.96067	-6.3074	2.0765	-3.03752	0.00238534	0.0119648	Y
chr12_112498074_112499192	4.56694	-6.41378	2.11305	-3.03532	0.00240282	0.0120362	Y
chr9_20715321_20770237	3.84302	-6.2642	2.06407	-3.03488	0.00240633	0.0120452	Y
chr1_51001041_51032903	3.14962	-5.82994	1.92127	-3.03441	0.00241003	0.0120553	Y
chr2_9377962_9437574	11.1544	3.92836	1.29497	3.03355	0.00241696	0.0120729	Y
chr6_135639657_135644462	3.86695	-6.27286	2.06782	-3.03356	0.00241683	0.0120729	Y
chr9_139115853_139118720	60.2842	1.03486	0.341243	3.03262	0.00242437	0.0120843	N
chr10_34985246_34989132	3.95955	-6.30701	2.07945	-3.03302	0.00242118	0.0120843	Y
chr10_7285520_7318951	3.74037	-6.22529	2.05264	-3.03282	0.00242281	0.0120843	Y
chr18_60015401_60017170	3.86906	-6.27362	2.06942	-3.03159	0.0024327	0.0121173	Y
chr15_86182605_86189185	3.82442	-6.25744	2.06462	-3.0308	0.00243911	0.0121236	Y
chr3_4403723_4403938	3.67381	-6.19904	2.04518	-3.03104	0.0024371	0.0121236	Y
chr6_71136273_71162274	4.65218	-5.92506	1.95486	-3.03094	0.00243796	0.0121236	Y
chr17_18768782_18775962	5.11977	-5.9127	1.95128	-3.03016	0.00244426	0.0121407	Y
chr2_240929491_240951113	6.75957	-6.20781	2.04913	-3.02948	0.00244974	0.0121595	Y
chr3_142455221_142481155	3.66066	-6.19406	2.04492	-3.02899	0.0024537	0.0121705	Y
chr12_113758136_113759153	4.14935	-6.37451	2.10484	-3.02851	0.00245765	0.0121816	Y
chr12_27786295_27788048	20.7136	2.37158	0.783209	3.02803	0.00246156	0.012184	Y
chrX_130522991_130533678	3.74359	-6.22649	2.05617	-3.0282	0.00246015	0.012184	Y
chr4_139135739_139153536	3.57451	-6.15962	2.03435	-3.02781	0.00246333	0.0121842	Y
chr5_58481015_58511794	4.11042	-6.36131	2.10116	-3.02752	0.00246565	0.0121872	Y
chr9_6849507_6893232	58.4712	1.05706	0.349363	3.02569	0.00248066	0.0122147	N
chr12_112371690_112429693	4.45362	-6.3208	2.08927	-3.02537	0.00248328	0.0122147	Y
chr12_29812813_29813818	4.50328	-6.49275	2.14536	-3.02642	0.0024747	0.0122147	Y
chr16_4382216_4383520	23.1188	1.62825	0.538281	3.0249	0.00248713	0.0122147	Y
chr19_20959172_20976684	8.0847	-6.88716	2.27728	-3.02429	0.00249218	0.0122147	Y
chr2_135007621_135012215	18.2095	2.71364	0.896998	3.02524	0.00248432	0.0122147	Y
chr2_143712379_143718339	3.67815	-6.20069	2.04905	-3.02613	0.00247709	0.0122147	Y
chr2_209150450_209153542	49.4967	-1.04215	0.344463	-3.02543	0.00248276	0.0122147	Y
chr22_50810449_50827540	3.90847	-6.28887	2.0793	-3.02451	0.00249035	0.0122147	Y
chr3_23250183_23258803	4.56005	-6.51111	2.15306	-3.02411	0.00249363	0.0122147	Y
chr4_30921775_30924205	4.25868	-6.41275	2.12028	-3.02448	0.00249064	0.0122147	Y
chr7_50771518_50823753	3.73925	-6.22488	2.05702	-3.02616	0.00247683	0.0122147	Y
chr9_74810420_74834422	6.27312	-6.67743	2.20738	-3.02504	0.00248598	0.0122147	Y
chr11_68571468_68575106	53.1164	1.57245	0.52006	3.0236	0.00249784	0.0122217	Y
chr5_87581561_87588460	4.63606	-6.53437	2.16118	-3.02352	0.00249853	0.0122217	Y
chr9_132841909_132854660	3.90735	-6.28847	2.08083	-3.0221	0.0025103	0.0122708	Y
chr1_198231705_198266370	3.83521	-6.26136	2.07205	-3.02183	0.00251254	0.0122733	Y
chr12_11187381_11273779	4.06121	-6.34348	2.09973	-3.02109	0.00251867	0.0122928	Y
chr17_73204622_73214401	6.14002	-5.9226	1.96059	-3.02082	0.0025209	0.0122928	Y
chr4_139135739_139157605	3.84414	-6.2646	2.07388	-3.02072	0.00252174	0.0122928	Y
chrX_112291554_112369568	4.14204	-6.37204	2.10964	-3.02043	0.00252414	0.0122961	Y
chr11_18010144_18031686	18.1749	3.33389	1.10433	3.01893	0.00253669	0.0123149	N
chr1_155377933_155385714	3.48178	-6.12172	2.02745	-3.01941	0.00253267	0.0123149	Y
chr1_245222688_245246990	3.83955	-6.26294	2.0745	-3.01901	0.00253606	0.0123149	Y
chr5_71579332_71609985	4.15592	-6.37673	2.11209	-3.01916	0.0025348	0.0123149	Y
chr9_33886879_33900269	4.15592	-6.37673	2.11209	-3.01916	0.0025348	0.0123149	Y
chr1_156202111_156203519	3.84959	-6.26658	2.07655	-3.01779	0.00254629	0.012353	Y
chr15_93496587_93510743	5.15433	-6.4616	2.14203	-3.01658	0.0025564	0.0123736	N
chr10_86130770_86133571	3.4752	-6.1191	2.02858	-3.01645	0.00255753	0.0123736	Y
chr11_38116674_38144663	3.95869	-6.3067	2.09058	-3.01672	0.00255523	0.0123736	Y
chr3_38006062_38017385	3.69936	6.19321	2.05291	3.01679	0.00255464	0.0123736	Y
chr2_148730308_148739650	102.199	-0.727623	0.241255	-3.01599	0.00256138	0.0123838	N
chrX_2326786_2343345	3.68137	-6.20191	2.05652	-3.01574	0.00256356	0.0123859	Y
chr12_28457559_28544344	4.06654	-6.34532	2.10501	-3.01439	0.00257498	0.0124241	Y
chr7_8043538_8047896	4.06431	-6.34456	2.10463	-3.01456	0.00257348	0.0124241	Y
chr9_133333788_133333976	4.19087	-6.38938	2.12	-3.01386	0.00257946	0.0124372	Y
chr9_124794002_124802758	3.85368	-6.26807	2.07999	-3.01351	0.00258248	0.0124434	Y
chr3_33725851_33738425	109.467	-0.94825	0.314959	-3.01071	0.00260638	0.0125084	N
chr12_96707099_96728643	4.59279	-6.52117	2.166	-3.0107	0.00260646	0.0125084	Y
chr19_48922491_48923071	3.57116	-6.15832	2.04563	-3.01048	0.00260834	0.0125084	Y
chr3_196921296_197024655	3.68472	-6.20318	2.0602	-3.01096	0.00260422	0.0125084	Y
chr6_136472298_136476896	3.57116	-6.15832	2.04563	-3.01048	0.00260834	0.0125084	Y
chr7_35903162_35913385	3.48388	-6.12256	2.03337	-3.01104	0.00260358	0.0125084	Y
chr9_102606931_102609897	3.9138	-6.29077	2.08948	-3.01068	0.00260663	0.0125084	Y
chr15_62871704_62881961	3.90413	-6.28731	2.08865	-3.01023	0.00261048	0.0125101	Y
chr5_137342679_137354835	4.05799	-6.34237	2.1078	-3.009	0.00262109	0.0125525	Y
chr1_168200752_168208398	3.20974	-5.86093	1.94813	-3.0085	0.00262542	0.0125648	N
chr4_103644028_103647840	3.77186	-6.23698	2.07335	-3.00817	0.00262826	0.0125699	Y
chr10_69797850_69826974	3.46653	-6.11563	2.03371	-3.00714	0.00263722	0.012579	Y
chr11_27412641_27434407	3.55603	-6.15242	2.04608	-3.00693	0.002639	0.012579	Y
chr2_191765290_191769893	36.4811	1.32198	0.439531	3.00771	0.00263223	0.012579	Y
chr2_242028603_242033847	38.942	-1.52538	0.507194	-3.00749	0.00263417	0.012579	Y
chr9_97555047_97563284	3.97158	-6.31125	2.09891	-3.00693	0.00263905	0.012579	Y
chr2_78225204_78252550	24.5703	-2.37456	0.789999	-3.00577	0.00264907	0.0125899	N
chr1_98144651_98165103	4.10248	-6.3586	2.11641	-3.00442	0.00266085	0.0125899	Y
chr10_114799784_114849299	3.2952	-6.04232	2.01037	-3.00557	0.00265081	0.0125899	Y
chr10_69902697_69918384	3.37814	-6.07833	2.0229	-3.00476	0.00265793	0.0125899	Y
chr11_28311753_28318478	3.30066	-6.04461	2.01203	-3.00423	0.0026625	0.0125899	Y
chr12_106477642_106480663	3.96415	-6.30863	2.09988	-3.00428	0.0026621	0.0125899	Y
chr18_18963471_18983955	3.66822	-6.19693	2.06132	-3.00629	0.00264454	0.0125899	Y
chr22_29025540_29025818	3.38471	-6.08102	2.02416	-3.00422	0.00266267	0.0125899	Y
chr3_4418014_4461830	3.48401	-6.1226	2.03678	-3.00602	0.00264694	0.0125899	Y
chr6_165792683_165806285	3.30066	-6.04461	2.01203	-3.00423	0.0026625	0.0125899	Y
chr6_20649524_20781496	3.67914	-6.20107	2.06383	-3.00464	0.00265892	0.0125899	Y
chr8_15517016_15531345	4.09814	-6.35712	2.11516	-3.00551	0.00265137	0.0125899	Y
chrX_20204414_20222221	3.23578	-5.87314	1.95516	-3.00391	0.00266532	0.0125941	Y
chr11_120310838_120316173	24.7345	1.91797	0.638587	3.00346	0.0026693	0.0126044	N
chr3_196778448_196793625	3.9891	6.30272	2.09884	3.00295	0.0026738	0.0126127	Y
chr4_169812073_169825057	3.48822	-6.12429	2.03949	-3.00285	0.00267461	0.0126127	Y
chr6_99860427_99864304	4.44948	-6.4751	2.15709	-3.00178	0.00268406	0.0126488	Y
chr2_45925080_45928630	3.86824	6.2577	2.08569	3.00031	0.00269709	0.0126502	N
chr10_12802947_12811798	3.39996	-6.08724	2.02909	-2.99999	0.00269992	0.0126502	Y
chr12_105303433_105322472	3.40207	-6.08811	2.02907	-3.00044	0.00269589	0.0126502	Y
chr2_99811214_99832577	4.98185	-5.93245	1.97692	-3.00085	0.00269224	0.0126502	Y
chr3_29781211_29804480	3.63896	-6.18579	2.06156	-3.00054	0.00269504	0.0126502	Y
chr4_95539155_95561601	4.16917	-6.3821	2.12729	-3.00011	0.00269879	0.0126502	Y
chr6_111708968_111714175	4.19937	-6.22575	2.07444	-3.00117	0.00268943	0.0126502	Y
chr9_138905045_138908275	65.0614	-1.1665	0.388843	-2.99993	0.00270043	0.0126502	Y
chr9_20758089_20778767	3.20682	-6.00304	2.00015	-3.00129	0.00268842	0.0126502	Y
chr17_46189393_46190022	8.59542	4.37902	1.46054	2.99823	0.00271557	0.0127127	N
chr9_74823141_74828907	3.29731	-6.04321	2.01579	-2.99794	0.00271815	0.0127164	Y
chr1_21076216_21100103	52.7378	-1.02046	0.340487	-2.99706	0.00272594	0.0127271	Y
chr12_69084411_69094633	6.87247	-6.74083	2.24954	-2.99654	0.00273063	0.0127271	Y
chr14_45715946_45716580	3.1629	-5.83629	1.94756	-2.99672	0.00272899	0.0127271	Y
chr16_2498856_2499916	4.95777	-5.82791	1.94476	-2.99672	0.00272899	0.0127271	Y
chr18_13012972_13019205	6.36414	6.6759	2.22741	2.99716	0.00272506	0.0127271	Y
chr5_80908381_80946158	3.59521	-6.16765	2.0583	-2.99647	0.00273122	0.0127271	Y
chr20_34312492_34313077	41.3644	1.10644	0.369343	2.99571	0.00273808	0.0127507	N
chr17_19445706_19452990	4.27814	-6.41914	2.14352	-2.99467	0.00274741	0.0127773	Y
chr8_128152989_128161917	3.11409	-5.96073	1.99035	-2.99481	0.00274615	0.0127773	Y
chr1_53326403_53333449	2.74962	-5.7811	1.93074	-2.99424	0.00275131	0.0127787	Y
chr12_111923069_111924628	2.74962	-5.7811	1.93074	-2.99424	0.00275131	0.0127787	Y
chr14_104624092_104633385	3.50025	-6.12907	2.04787	-2.9929	0.00276338	0.0128118	Y
chr3_45130546_45133030	9.92315	5.68905	1.90101	2.99265	0.00276567	0.0128118	Y
chr6_304628_348841	2.74416	-5.77839	1.93073	-2.99285	0.00276388	0.0128118	Y
chr6_5771524_5775549	3.50025	-6.12907	2.04787	-2.9929	0.00276338	0.0128118	Y
chr10_12160748_12162266	3.30165	-6.04503	2.02111	-2.99094	0.00278121	0.0128418	N
chr15_71174814_71175247	2.84346	-5.82946	1.94881	-2.99129	0.00277801	0.0128418	Y
chr19_53887125_53888280	2.84346	-5.82946	1.94881	-2.99129	0.00277801	0.0128418	Y
chr2_227574201_227600966	3.30165	-6.04503	2.02111	-2.99094	0.00278121	0.0128418	Y
chr2_29375551_29390406	2.84235	-5.82892	1.94836	-2.99171	0.00277416	0.0128418	Y
chr10_27855761_27867642	3.49492	-6.12695	2.04879	-2.99052	0.00278503	0.012851	Y
chr15_32498465_32500399	2.92962	-5.87267	1.96596	-2.98718	0.00281562	0.0128554	N
chr3_48215774_48219478	67.8237	0.895569	0.29969	2.98831	0.00280523	0.0128554	N
chr6_111208708_111211559	223.559	-0.574291	0.192345	-2.98574	0.00282894	0.0128554	N
chr6_136990421_137019820	9.03152	-6.82646	2.28331	-2.98972	0.00279229	0.0128554	N
chr11_13009949_13048585	2.92528	-5.87064	1.96429	-2.98869	0.00280178	0.0128554	Y
chr13_36822743_36828280	3.40542	-6.08947	2.03738	-2.98888	0.00280007	0.0128554	Y
chr13_36857606_36869994	2.83912	-5.82737	1.94938	-2.98935	0.00279571	0.0128554	Y
chr14_103915256_103923549	3.27995	-6.03591	2.02142	-2.98598	0.00282673	0.0128554	Y
chr14_71511850_71524441	5.95506	-6.61064	2.21341	-2.98663	0.00282074	0.0128554	Y
chr15_62966026_62978995	3.01367	-5.91364	1.97983	-2.98695	0.00281776	0.0128554	Y
chr15_65799581_65804902	5.74647	-5.95343	1.99362	-2.98624	0.00282433	0.0128554	Y
chr2_136360070_136362586	35.1728	1.42286	0.476447	2.98639	0.0028229	0.0128554	Y
chr2_9985349_9994550	4.23216	-6.40313	2.14349	-2.98724	0.00281505	0.0128554	Y
chr22_28943662_28946139	3.7219	-6.21839	2.07981	-2.98988	0.00279085	0.0128554	Y
chr3_23996028_23996294	3.56024	-6.15407	2.06019	-2.98714	0.00281601	0.0128554	Y
chr4_141868808_141889027	3.19913	-5.99973	2.00685	-2.98962	0.00279327	0.0128554	Y
chr4_89396992_89400658	3.86236	-6.27121	2.09962	-2.98683	0.00281885	0.0128554	Y
chr5_37351292_37358253	3.45673	-6.1117	2.04701	-2.98568	0.00282953	0.0128554	Y
chr6_58246062_58256569	3.01801	-5.91562	1.97981	-2.98798	0.00280831	0.0128554	Y
chr7_87369107_87370895	3.11074	-5.95925	1.99496	-2.98715	0.00281588	0.0128554	Y
chr8_19315937_19316153	5.21347	-6.70468	2.2432	-2.98889	0.00279991	0.0128554	Y
chr9_130931331_130943078	3.29744	-6.04326	2.02146	-2.98954	0.00279394	0.0128554	Y
chr9_136790965_136804341	7.01652	-6.72346	2.25011	-2.98805	0.0028076	0.0128554	Y
chrX_44833911_44879975	3.11074	-5.95925	1.99496	-2.98715	0.00281588	0.0128554	Y
chr12_101413812_101442179	2.74305	-5.77784	1.93549	-2.9852	0.00283389	0.0128669	Y
chr16_792250_792543	302.258	0.831363	0.278599	2.98408	0.00284433	0.0128744	N
chr1_32495899_32498935	3.46752	-6.11602	2.04984	-2.98366	0.00284824	0.0128744	Y
chr12_110778464_110780253	6.78054	6.8195	2.28536	2.98399	0.00284513	0.0128744	Y
chr14_31605737_31626092	2.7464	-5.7795	1.93693	-2.98384	0.00284658	0.0128744	Y
chr16_89371614_89379997	9.11276	-5.70312	1.91096	-2.98443	0.00284109	0.0128744	Y
chr17_2075952_2076153	3.49802	-6.12818	2.05353	-2.98422	0.00284304	0.0128744	Y
chr2_219498828_219499353	3.39674	-6.08593	2.03897	-2.98481	0.00283753	0.0128744	Y
chr6_64088931_64092461	2.94053	-5.87776	1.97013	-2.98345	0.00285023	0.0128751	Y
chr1_144595835_144596473	3.12822	-5.96697	2.00086	-2.98221	0.0028618	0.0128858	NA
chr13_43986052_43987124	4.92501	-6.62216	2.22056	-2.9822	0.00286187	0.0128858	Y
chr14_97299804_97327072	3.36723	-6.07384	2.03645	-2.98256	0.00285846	0.0128858	Y
chr3_47960209_47969840	3.1271	-5.96648	2.00048	-2.98252	0.00285889	0.0128858	Y
chr4_89052213_89061166	3.36946	-6.07476	2.03708	-2.98209	0.00286287	0.0128858	Y
chr9_114337014_114348445	3.46988	-6.11696	2.05141	-2.98183	0.00286532	0.0128858	Y
chrX_2184781_2343345	3.46988	-6.11696	2.05141	-2.98183	0.00286532	0.0128858	Y
chr16_7929541_7944397	3.21326	-6.00581	2.01446	-2.98135	0.00286976	0.0128894	Y
chr8_128996150_129022690	14.637	5.09415	1.70864	2.9814	0.0028693	0.0128894	Y
chr1_176050288_176104222	3.044	-5.77574	1.93809	-2.98012	0.00288135	0.0129169	Y
chr1_54254806_54262817	3.03549	-5.92356	1.98767	-2.98015	0.00288109	0.0129169	Y
chr12_122716677_122717515	2.74739	-5.77999	1.93929	-2.98047	0.00287804	0.0129169	Y
chr14_39815108_39818181	4.9218	-6.62067	2.22178	-2.9799	0.00288343	0.012918	Y
chr8_71126138_71209035	3.2078	-6.00346	2.01496	-2.97945	0.00288768	0.0129288	N
chr14_37709638_37717112	3.30053	-6.04456	2.02976	-2.97796	0.00290173	0.0129606	Y
chr17_29061915_29111910	3.71966	-6.21755	2.08775	-2.97811	0.00290033	0.0129606	Y
chr4_141330991_141334241	2.92416	-5.87011	1.9709	-2.9784	0.00289759	0.0129606	Y
chr8_128152989_128186609	3.38694	-6.08193	2.04234	-2.97792	0.00290209	0.0129606	Y
chr13_31789188_31803431	69.1727	1.25234	0.420575	2.9777	0.0029042	0.0129618	Y
chr7_23435746_23458443	3.48599	-6.1234	2.0568	-2.97715	0.00290944	0.0129771	Y
chr13_88099351_88163725	3.21872	-6.00816	2.01839	-2.97671	0.00291357	0.0129791	Y
chr9_123407003_123421853	3.21872	-6.00816	2.01839	-2.97671	0.00291357	0.0129791	Y
chr1_42094420_42094618	3.02669	-5.91957	1.98932	-2.97568	0.00292343	0.0129797	Y
chr13_100925450_100992513	4.15034	-6.37486	2.14256	-2.97534	0.0029266	0.0129797	Y
chr15_76580187_76588078	3.38347	-6.08051	2.04344	-2.97562	0.00292393	0.0129797	Y
chr17_11984673_12016677	3.02669	-5.91957	1.98932	-2.97568	0.00292343	0.0129797	Y
chr17_66110563_66121621	30.6374	2.47345	0.831299	2.97541	0.00292598	0.0129797	Y
chr18_1626240_1649794	3.58963	-6.1655	2.07162	-2.97617	0.00291874	0.0129797	Y
chr19_21302890_21303163	2.7583	-5.78539	1.94394	-2.97611	0.00291927	0.0129797	Y
chr3_136191255_136221621	6.76306	-5.95585	2.00186	-2.97516	0.00292836	0.0129797	Y
chr6_3737313_3738382	4.50326	-6.49347	2.18279	-2.97485	0.00293128	0.0129845	Y
chr12_110974729_110989773	3.85183	-6.26739	2.10694	-2.97463	0.00293338	0.0129857	Y
chr1_246784731_246797889	5.62272	-6.55653	2.20545	-2.97288	0.00295018	0.0130519	Y
chr15_76566753_76578822	3.27561	-6.03407	2.02992	-2.97257	0.0029532	0.0130571	Y
chr2_192141613_192160952	6.07731	-5.04733	1.6989	-2.97093	0.00296895	0.0130831	N
chr1_51032749_51050483	3.88654	-6.27994	2.11355	-2.97127	0.00296569	0.0130831	Y
chr12_112667502_112669519	2.8457	-5.83053	1.9626	-2.97083	0.00297001	0.0130831	Y
chr13_102047534_102051516	3.62917	-6.18202	2.08039	-2.97157	0.00296283	0.0130831	Y
chr14_55462321_55467710	7.31943	-5.88384	1.98068	-2.97062	0.00297201	0.0130831	Y
chr17_8455364_8480656	2.94599	-5.88031	1.97916	-2.97112	0.00296717	0.0130831	Y
chr9_80537077_80567347	3.31913	-6.05234	2.03739	-2.97064	0.00297182	0.0130831	Y
chr12_118456877_118460164	2.75173	-5.78215	1.94696	-2.96984	0.00297957	0.0130839	Y
chr12_20769164_20787990	2.75173	-5.78215	1.94696	-2.96984	0.00297957	0.0130839	Y
chr3_156638364_156660503	3.12487	-5.9655	2.00847	-2.97016	0.00297641	0.0130839	Y
chr5_37238959_37243221	3.41075	-6.09165	2.05091	-2.97022	0.0029759	0.0130839	Y
chr10_64148155_64159552	4.05043	-6.33977	2.13541	-2.96888	0.00298886	0.0131084	Y
chr13_73467922_73505405	3.03872	-5.92502	1.9957	-2.9689	0.00298869	0.0131084	Y
chr2_55812187_55816092	3.13256	-5.96888	2.01067	-2.9686	0.00299156	0.0131122	N
chr10_52100147_52104105	3.21214	-6.00533	2.02308	-2.96841	0.00299343	0.0131122	Y
chr5_37115062_37120442	3.2176	-6.00768	2.02477	-2.96709	0.00300637	0.0131574	Y
chr6_52935855_52941341	3.13144	-5.96839	2.01161	-2.96697	0.00300747	0.0131574	Y
chr5_127782174_127855061	2.94388	-5.87932	1.98192	-2.96648	0.00301229	0.0131634	Y
chr6_165862416_165868183	3.77397	-6.23777	2.10277	-2.96645	0.00301255	0.0131634	Y
chr2_72922129_72958374	2.76165	-5.78705	1.95114	-2.96598	0.00301716	0.0131754	Y
chr2_228352333_228356356	3.78303	-6.24111	2.1046	-2.96545	0.00302237	0.01319	Y
chr2_38349127_38358756	3.22752	-6.01193	2.02782	-2.96473	0.00302952	0.0132131	Y
chr20_7976673_7990962	69.3428	0.795708	0.268454	2.96403	0.00303634	0.0132347	N
chr17_43111303_43268537	3.12178	-5.96412	2.01237	-2.96372	0.00303941	0.01324	Y
chr12_133393126_133398897	4.44232	-6.26018	2.11344	-2.96209	0.00305561	0.0132697	Y
chr5_37342651_37358253	3.6955	-6.20727	2.09517	-2.96266	0.00304996	0.0132697	Y
chr8_15508206_15519805	3.91591	-6.29151	2.12395	-2.96217	0.0030548	0.0132697	Y
chr9_108467878_108510471	5.89216	-6.56593	2.21665	-2.96209	0.00305556	0.0132697	Y
chr9_13247634_13250371	3.03103	-5.92154	1.99895	-2.96232	0.0030533	0.0132697	Y
chr20_50224066_50230371	2.76383	5.77356	1.94937	2.96176	0.00305888	0.0132725	N
chr1_227381487_227504947	3.13033	-5.9679	2.01519	-2.96146	0.00306187	0.0132725	Y
chr14_39746138_39764233	5.40955	-6.49571	2.19333	-2.96158	0.00306066	0.0132725	Y
chr10_52193236_52226692	4.32461	-6.22769	2.10305	-2.96126	0.0030638	0.0132727	Y
chr12_51442817_51450285	4.13831	-6.37079	2.15152	-2.96106	0.0030658	0.0132733	Y
chr10_28023385_28024303	3.57575	-6.1601	2.0816	-2.95932	0.00308321	0.0133405	Y
chr2_69585461_69597240	2.82499	-5.82054	1.96766	-2.9581	0.00309544	0.0133852	Y
chr1_212179981_212190365	4.49822	-5.92447	2.00296	-2.95786	0.00309784	0.0133874	Y
chr12_63083479_63114069	3.22864	-6.01241	2.03301	-2.9574	0.00310247	0.0133911	Y
chr12_8866407_8866637	30.0478	-1.62478	0.549384	-2.95746	0.00310185	0.0133911	Y
chr13_46090278_46104053	6.40917	6.6387	2.24498	2.95714	0.00310511	0.0133943	Y
chr12_123262038_123265877	3.7121	-6.2147	2.10207	-2.95646	0.00311194	0.0134156	N
chr9_4823531_4827033	6.44901	-5.863	1.98326	-2.95624	0.00311416	0.013417	N
chr5_65307877_65324171	3.20037	-6.00025	2.02984	-2.95602	0.0031164	0.0134185	Y
chr12_122181535_122190129	7.64509	-6.74293	2.28199	-2.95484	0.00312827	0.0134437	N
chr10_52066604_52071175	3.60612	-6.17189	2.08868	-2.95493	0.00312742	0.0134437	Y
chr5_170308810_170323119	3.11198	-5.95979	2.01684	-2.95501	0.00312654	0.0134437	Y
chr5_32121601_32143986	3.56781	-6.15701	2.08381	-2.95469	0.00312983	0.0134437	Y
chr3_179418796_179426745	3.10107	-5.95495	2.01563	-2.95439	0.00313286	0.0134485	Y
chr2_135011833_135012215	7.77594	5.96052	2.0178	2.95397	0.00313712	0.0134587	N
chrX_10058811_10066619	3.21648	-6.0072	2.03407	-2.95329	0.00314405	0.0134802	Y
chr12_108136974_108140201	18.1056	2.13165	0.722024	2.95233	0.00315387	0.0134896	Y
chr2_19844520_19874103	3.12723	-5.96653	2.02086	-2.95248	0.00315233	0.0134896	Y
chr3_12570387_12574272	3.76263	-6.04638	2.04778	-2.95266	0.00315048	0.0134896	Y
chr3_183584413_183585848	2.9352	-5.87527	1.98988	-2.95257	0.00315137	0.0134896	Y
chr11_76687333_76709865	2.91003	-5.86346	1.98627	-2.952	0.00315726	0.013496	Y
chr10_6875605_6880164	3.22542	-6.01103	2.03679	-2.95123	0.00316514	0.0135052	Y
chr7_135327940_135330979	4.01594	6.31297	2.13885	2.95157	0.00316161	0.0135052	Y
chr7_33303902_33313568	3.4162	-6.09387	2.06484	-2.95125	0.00316487	0.0135052	Y
chr5_78399987_78419286	2.94264	-5.87875	1.99226	-2.95079	0.00316961	0.0135162	Y
chr3_141087463_141122873	19.8966	1.84179	0.624814	2.94775	0.00320099	0.0135221	N
chr14_50647290_50655418	2.94921	-5.88182	1.99505	-2.94821	0.00319624	0.0135221	Y
chr14_53327059_53340944	2.81953	-5.8179	1.97357	-2.9479	0.00319936	0.0135221	Y
chr14_70477471_70490164	2.94921	-5.88182	1.99505	-2.94821	0.00319624	0.0135221	Y
chr16_25162875_25170279	2.73214	-5.7724	1.95813	-2.94791	0.00319929	0.0135221	Y
chr16_71712658_71715808	30.8434	-1.47194	0.499142	-2.94895	0.00318858	0.0135221	Y
chr19_44580475_44589956	5.42046	-6.49912	2.20397	-2.94882	0.00318993	0.0135221	Y
chr2_187604955_187618776	2.9759	5.87933	1.99315	2.94978	0.00318004	0.0135221	Y
chr2_212483902_212495319	3.04417	-5.9275	2.00932	-2.95	0.0031777	0.0135221	Y
chr2_39552659_39553418	4.90694	-6.37273	2.16156	-2.94821	0.00319616	0.0135221	Y
chr3_119666115_119812440	3.88976	-6.28111	2.12982	-2.94913	0.00318667	0.0135221	Y
chr3_41722999_41759353	5.64763	6.50791	2.207	2.94876	0.00319048	0.0135221	Y
chr5_133316420_133316647	3.81697	6.23698	2.11602	2.94751	0.00320344	0.0135221	Y
chr8_104709314_104709524	3.80736	6.23346	2.11414	2.94846	0.00319358	0.0135221	Y
chr8_28827560_28837673	3.13591	-5.97036	2.02367	-2.95026	0.00317504	0.0135221	Y
chr9_125627628_125639862	3.5134	-6.13429	2.08118	-2.94751	0.00320346	0.0135221	Y
chr9_74810420_74817658	2.94921	-5.88182	1.99505	-2.94821	0.00319624	0.0135221	Y
chr11_10019813_10024236	3.21128	-6.00496	2.03761	-2.94706	0.0032081	0.0135336	Y
chr1_227192695_227204751	20.8837	-2.51794	0.854684	-2.94605	0.00321861	0.0135566	N
chr6_57372288_57472441	2.74317	-5.77789	1.96121	-2.94608	0.00321827	0.0135566	NA
chr11_9069490_9074762	2.76152	-5.787	1.96437	-2.94598	0.0032193	0.0135566	Y
chr12_102107868_102114032	3.85294	-6.2678	2.12782	-2.94564	0.00322283	0.0135635	Y
chr7_50737419_50778687	2.90681	-5.86194	1.99058	-2.94484	0.00323124	0.0135908	Y
chr2_201881714_201887655	6.91457	-5.81947	1.97661	-2.94417	0.00323825	0.0136041	Y
chrX_2129531_2139270	3.11284	-5.96018	2.02435	-2.94425	0.00323743	0.0136041	Y
chr1_246600450_246603426	62.8127	-1.07617	0.36555	-2.94398	0.00324023	0.0136044	Y
chr12_82780582_82796909	3.97293	-6.31271	2.14452	-2.94365	0.00324366	0.0136107	Y
chr9_136726496_136804341	2.82486	-5.82048	1.9777	-2.94305	0.00324993	0.0136289	Y
chr20_13550154_13568017	8.73053	5.44331	1.85145	2.94002	0.0032819	0.0136834	N
chr1_246899277_246907427	3.2647	-6.02944	2.05052	-2.94045	0.00327737	0.0136834	Y
chr1_44750507_44785416	46.7527	-1.4115	0.480012	-2.94054	0.00327637	0.0136834	Y
chr12_112371690_112381173	34.4752	-1.41693	0.481774	-2.94107	0.00327081	0.0136834	Y
chr12_7171571_7172603	2.84334	-5.82941	1.98295	-2.93976	0.00328464	0.0136834	Y
chr14_62187097_62188541	3.36078	-6.07117	2.0643	-2.94103	0.0032712	0.0136834	Y
chr14_92562437_92563182	3.71743	-6.21669	2.114	-2.94072	0.00327449	0.0136834	Y
chr15_94927251_94945248	3.5067	-6.13164	2.08481	-2.94111	0.00327042	0.0136834	Y
chr4_144449021_144449867	3.08681	-5.94859	2.0232	-2.9402	0.00328005	0.0136834	Y
chr4_41600937_41621457	2.84334	-5.82941	1.98295	-2.93976	0.00328464	0.0136834	Y
chr5_36953720_36962376	3.42067	-6.09569	2.0735	-2.93981	0.00328416	0.0136834	Y
chr8_131226802_131414216	3.68017	6.1859	2.10432	2.93962	0.00328611	0.0136834	Y
chr1_116576379_116580009	3.56595	-6.15628	2.09502	-2.93854	0.00329767	0.0137235	Y
chr1_225273246_225284941	2.91325	-5.86498	1.99631	-2.93791	0.00330437	0.0137433	Y
chr17_76411033_76415806	6.983	-5.87215	1.99906	-2.93746	0.00330912	0.0137492	Y
chr3_172003716_172028671	3.2983	-6.04362	2.05747	-2.93741	0.00330966	0.0137492	Y
chr3_195800801_195802231	3.71646	6.01555	2.04831	2.93684	0.00331573	0.0137663	Y
chr8_66534498_66539668	6.61984	-5.86357	1.99684	-2.93642	0.00332024	0.0137731	N
chr11_9597435_9598810	3.13703	-5.97086	2.03355	-2.93617	0.00332289	0.0137731	Y
chr14_80944597_80997230	2.85425	-5.83466	1.98718	-2.93614	0.0033232	0.0137731	Y
chr5_59982789_59983665	8.25685	5.51027	1.87714	2.93547	0.00333044	0.0137912	N
chr2_61406116_61413632	3.52987	-6.14213	2.09245	-2.93537	0.00333146	0.0137912	Y
chr1_53343354_53347337	2.76809	-5.79025	1.97304	-2.93469	0.0033388	0.0138055	Y
chr7_90537633_90585132	2.76809	-5.79025	1.97304	-2.93469	0.0033388	0.0138055	Y
chr10_31661947_31676727	2.94152	-5.87824	2.0034	-2.93413	0.00334489	0.0138115	N
chr8_11666303_11696082	7.8766	-5.77401	1.96796	-2.93401	0.00334611	0.0138115	N
chr12_123651202_123665757	2.94152	-5.87824	2.0034	-2.93413	0.00334489	0.0138115	Y
chr1_23356962_23385660	3.47756	-6.12003	2.08613	-2.93367	0.00334978	0.0138181	Y
chr3_72757995_72765768	4.68668	-6.34873	2.16435	-2.93332	0.00335357	0.0138181	Y
chr9_80921230_80923499	3.27983	-6.03584	2.0576	-2.93344	0.00335233	0.0138181	Y
chr3_81627076_81630426	3.32012	-6.05277	2.06361	-2.93309	0.00335602	0.0138202	Y
chr10_121663596_121668642	14.9549	3.57184	1.21808	2.93235	0.00336406	0.0138211	Y
chr2_143638914_143685310	2.75495	-5.78375	1.97236	-2.9324	0.00336356	0.0138211	Y
chr2_197777606_197786910	26.81	2.14019	0.729809	2.93254	0.00336207	0.0138211	Y
chr6_25605040_25606501	2.75495	-5.78375	1.97236	-2.9324	0.00336356	0.0138211	Y
chr3_31774749_31921322	2.99631	-5.90568	2.01411	-2.93215	0.0033662	0.0138219	Y
chr16_29916173_29917280	14.1464	4.77049	1.62718	2.93175	0.00337061	0.0138281	Y
chr19_49407604_49409142	3.3081	-6.04774	2.06294	-2.93161	0.00337209	0.0138281	Y
chr6_56535439_56569167	2.95045	-5.8824	2.00663	-2.93148	0.00337355	0.0138281	Y
chr12_20076132_20127661	3.08358	-5.94715	2.02902	-2.93104	0.00337831	0.0138396	Y
chr4_7787921_7811490	3.31355	-6.05002	2.06447	-2.93055	0.00338365	0.0138534	Y
chr15_72873072_72874528	4.95057	-6.38828	2.1801	-2.93027	0.00338666	0.0138577	Y
chr12_124882665_124934413	3.54413	-6.14773	2.09887	-2.92907	0.00339982	0.0139035	Y
chr1_185183639_185200840	3.91045	-6.28955	2.14742	-2.92888	0.00340183	0.0139037	Y
chr7_138738197_138740041	3.36735	-6.07387	2.07447	-2.92791	0.00341245	0.0139391	Y
chr8_15480589_15531345	3.0847	-5.94764	2.03268	-2.92601	0.00343341	0.0140086	Y
chr9_73941876_73944193	3.94194	-6.30078	2.15328	-2.92613	0.00343202	0.0140086	Y
chr1_233334685_233344435	4.37017	-6.23253	2.13048	-2.92542	0.00343993	0.0140141	Y
chr1_246490503_246498776	69.5166	-1.17618	0.402055	-2.92542	0.00343989	0.0140141	Y
chr10_104809464_104816721	2.90457	-5.86087	2.00358	-2.9252	0.00344234	0.0140141	Y
chr2_113520920_113528473	4.02553	6.3163	2.15929	2.92517	0.00344269	0.0140141	Y
chr1_243362362_243375266	2.74949	-5.78104	1.97792	-2.92279	0.00346915	0.0141056	Y
chr14_53539315_53570574	3.76628	-6.23492	2.1332	-2.92281	0.00346889	0.0141056	Y
chr5_122868263_122893258	3.2362	-6.01567	2.05849	-2.92237	0.00347375	0.0141162	Y
chr14_58718837_58724716	4.34538	-6.22328	2.12981	-2.92198	0.00347809	0.0141257	Y
chr15_72837161_72855841	2.81185	-5.81415	1.98992	-2.9218	0.00348018	0.0141261	Y
chr17_18210205_18212255	3.03996	-5.9256	2.02907	-2.92036	0.00349632	0.0141796	N
chr3_149415493_149421115	2.95355	-5.88386	2.01484	-2.92026	0.00349735	0.0141796	Y
chr13_101997617_102051516	3.41942	-6.0952	2.08811	-2.919	0.00351156	0.0142209	Y
chr9_90219869_90221143	2.85971	-5.83728	1.99967	-2.91912	0.00351017	0.0142209	Y
chr21_38792601_38794954	3.03016	-5.92114	2.02866	-2.91874	0.00351446	0.0142245	Y
chr5_158368702_158368987	2.73102	-5.77183	1.97827	-2.91762	0.00352716	0.0142505	N
chr1_117944808_117984947	4.54622	-6.29862	2.15904	-2.91733	0.00353047	0.0142505	Y
chr1_230398319_230401113	2.86529	-5.83996	2.00178	-2.91738	0.00352982	0.0142505	Y
chr12_20790034_20803534	3.13814	-5.97136	2.04653	-2.9178	0.00352513	0.0142505	Y
chr17_26685939_26687594	2.76586	-5.78916	1.98456	-2.91711	0.00353293	0.0142505	Y
chr5_127782174_127800614	2.86206	-5.83841	2.00156	-2.91693	0.00353497	0.0142505	Y
chr5_64863340_64868113	2.86206	-5.83841	2.00156	-2.91693	0.00353497	0.0142505	Y
chr4_102014933_102030235	2.71912	-5.76587	1.97684	-2.9167	0.00353753	0.0142528	Y
chr17_57767997_57851246	3.11173	-5.95968	2.04358	-2.9163	0.00354215	0.0142558	Y
chr5_108281831_108295048	35.8923	-2.10633	0.722265	-2.91628	0.00354231	0.0142558	Y
chr8_17532695_17542051	2.73536	-5.774	1.98005	-2.91609	0.00354449	0.0142563	N
chr11_28711107_28763455	3.61392	-6.17613	2.1182	-2.91574	0.00354849	0.0142563	Y
chr3_136045645_136048826	6.3974	-5.98739	2.0534	-2.91585	0.00354722	0.0142563	Y
chr15_83357488_83358205	3.04309	5.91017	2.02716	2.9155	0.00355121	0.0142592	Y
chr14_31792771_31795548	3.04628	-5.92847	2.03408	-2.91458	0.00356168	0.0142931	Y
chr15_94983405_95001475	5.14569	-6.40248	2.19689	-2.91434	0.00356446	0.0142962	Y
chr22_50191453_50198008	9.22647	-5.37792	1.84625	-2.91289	0.00358101	0.0143463	N
chr10_60374053_60380661	2.74429	-5.77844	1.98369	-2.91297	0.00358007	0.0143463	Y
chr3_33853564_33863574	3.14248	-5.97327	2.0511	-2.91222	0.00358867	0.0143689	Y
chr3_197592294_197593090	3.598	-5.9723	2.0513	-2.91147	0.00359735	0.0143884	N
chr11_38113314_38144663	2.80862	-5.81257	1.99646	-2.91145	0.00359761	0.0143884	Y
chr2_153431650_153437563	77.2738	-3.11679	1.07089	-2.91048	0.00360876	0.0144167	N
chr7_128898422_128928900	2.7397	-5.77616	1.98457	-2.91053	0.00360814	0.0144167	N
chr18_19144164_19148055	33.7232	-1.27539	0.438327	-2.90968	0.00361797	0.0144454	Y
chr19_5077378_5082515	2.75929	-5.78591	1.98887	-2.90914	0.00362428	0.0144624	Y
chr7_152760682_152768089	11.488	-4.95205	1.70264	-2.90845	0.00363227	0.0144861	N
chrX_7432923_7434331	3.87426	-6.27554	2.1584	-2.9075	0.00364329	0.0145219	Y
chr12_70903992_70916410	2.74975	-5.78116	1.98864	-2.90709	0.0036481	0.01453	Y
chrX_133938131_133941738	3.34962	6.04978	2.08113	2.90697	0.00364943	0.01453	Y
chr5_70888753_70900295	123.014	0.680482	0.234159	2.90607	0.00366	0.0145639	N
chr12_60098553_60098799	3.48264	-6.12207	2.10687	-2.90576	0.00366362	0.0145701	Y
chr13_95813443_95818621	25.9204	1.57224	0.541286	2.90465	0.00367664	0.0145913	N
chr10_31644073_31676195	2.8664	-5.8405	2.01077	-2.9046	0.00367719	0.0145913	Y
chr12_28378232_28379132	3.49595	-5.92904	2.04117	-2.90473	0.0036757	0.0145913	Y
chr15_65743337_65744440	4.47853	-6.27334	2.15968	-2.90475	0.00367547	0.0145913	Y
chr15_51204275_51207768	5.77292	-6.50868	2.24134	-2.90392	0.00368517	0.0146148	Y
chrX_154645236_154649223	18.6328	-3.93151	1.35447	-2.90262	0.0037005	0.014651	N
chr3_100002451_100009545	2.93495	-5.87517	2.02397	-2.90279	0.00369857	0.014651	Y
chr3_145820542_145828235	3.03859	-5.92499	2.04113	-2.9028	0.00369845	0.014651	Y
chr11_86778736_86868448	3.46231	-6.11391	2.10707	-2.90162	0.00371236	0.0146897	Y
chr12_110832906_110839309	2.92081	-5.86853	2.0229	-2.90104	0.00371925	0.0147032	Y
chr16_521295_539000	4.22929	-6.40297	2.20717	-2.90099	0.0037199	0.0147032	Y
chr17_79254409_79258695	44.4558	1.75422	0.604805	2.90047	0.00372604	0.0147192	Y
chr1_116202262_116206889	16.0686	3.26976	1.12749	2.90005	0.00373104	0.0147308	N
chr5_37301539_37303516	20.3111	-3.29275	1.13571	-2.89928	0.00374026	0.0147507	N
chr17_15881114_15890682	3.47868	-6.12047	2.11103	-2.89929	0.00374011	0.0147507	Y
chr12_518534_527802	43.9067	-1.0736	0.3705	-2.8977	0.00375908	0.014792	Y
chr16_19474602_19475346	4.62541	-6.27127	2.16404	-2.89795	0.00375609	0.014792	Y
chr17_9559720_9570068	2.77368	-5.79303	1.99887	-2.89815	0.00375375	0.014792	Y
chr3_15452752_15455669	3.02037	-5.91668	2.04174	-2.89787	0.00375709	0.014792	Y
chr16_11827838_11830089	3.004	-5.90919	2.03939	-2.89752	0.00376122	0.0147922	Y
chr8_9437003_9437893	2.81631	-5.8163	2.0077	-2.89699	0.00376762	0.0148091	N
chr8_42317414_42323435	4.04681	6.08672	2.1021	2.89554	0.00378512	0.0148697	Y
chr2_240944627_240946787	7.03968	-5.83484	2.01545	-2.89505	0.00379097	0.0148759	N
chr1_178777180_178802685	3.02768	-5.92003	2.04488	-2.89505	0.00379101	0.0148759	Y
chr1_27056142_27059283	5.05589	-6.42907	2.22099	-2.89469	0.00379535	0.0148759	Y
chr12_95451329_95451654	5.26927	-6.44451	2.22645	-2.89452	0.00379742	0.0148759	Y
chr16_28619612_28620180	3.1987	-5.77678	1.99581	-2.89445	0.00379818	0.0148759	Y
chrX_135095117_135098917	27.5382	-1.51049	0.521873	-2.89436	0.0037993	0.0148759	Y
chr5_76621364_76633140	3.51872	-6.13643	2.12044	-2.89394	0.00380436	0.0148792	Y
chr9_37768073_37776402	3.40526	6.07406	2.09882	2.89403	0.00380333	0.0148792	Y
chr5_137353991_137354835	3.39425	-6.08493	2.10289	-2.8936	0.00380853	0.0148873	Y
chr17_34864736_34867294	2.96124	-5.88745	2.0349	-2.89324	0.00381294	0.0148964	Y
chr21_32537279_32575328	30.7492	1.8222	0.630012	2.89233	0.00382401	0.0149313	Y
chr13_35615070_35619538	4.17439	-6.38301	2.20708	-2.89206	0.00382728	0.0149359	Y
chr1_233296029_233314921	3.21605	-5.78542	2.00064	-2.89178	0.00383064	0.0149408	Y
chr3_33648083_33686395	5.4347	-6.50421	2.24957	-2.89131	0.00383636	0.0149466	Y
chr9_130230019_130236210	2.86516	-5.83992	2.01974	-2.89142	0.0038351	0.0149466	Y
chr15_52188616_52194233	4.07029	-6.11296	2.11455	-2.8909	0.00384138	0.014958	N
chr1_25124233_25153607	3.18078	-5.99174	2.07313	-2.89019	0.00385006	0.0149753	Y
chr17_80972330_81006661	3.23938	-5.87481	2.03266	-2.89021	0.00384985	0.0149753	Y
chr14_103894724_103923549	3.05285	-5.93146	2.05245	-2.88994	0.00385312	0.014979	Y
chr12_11187381_11199787	152.778	-3.63759	1.25893	-2.88943	0.00385939	0.0149951	N
chr9_20448121_20456784	16.508	-4.31279	1.493	-2.88868	0.00386861	0.0150155	Y
chrX_151130895_151131115	3.23942	-6.01707	2.083	-2.88866	0.00386889	0.0150155	Y
chr19_54025110_54025938	3.24166	-6.01803	2.08363	-2.88824	0.00387406	0.0150274	Y
chr2_86479080_86491164	3.48959	-6.12483	2.12078	-2.88801	0.00387689	0.0150301	Y
chr2_177161588_177193640	4.52005	-6.28927	2.17795	-2.8877	0.00388076	0.0150369	Y
chr3_186522066_186522513	8.07871	-6.14063	2.12801	-2.88562	0.00390643	0.0151198	N
chr19_35169642_35174143	7.2878	6.62732	2.29656	2.88576	0.00390467	0.0151198	Y
chr11_66254011_66255478	21.2914	1.98281	0.687286	2.88499	0.00391426	0.0151418	Y
chr9_111868788_111870850	86.0273	-0.638744	0.221435	-2.88457	0.00391953	0.015154	N
chr9_137293478_137300965	3.68769	-6.20434	2.15103	-2.88436	0.00392214	0.0151557	Y
chr5_118264232_118274985	2.80428	-5.81043	2.01482	-2.88384	0.00392858	0.0151724	Y
chr15_64066893_64067848	13.8424	2.7498	0.953656	2.88343	0.00393368	0.0151838	Y
chr4_148775827_148803083	4.1853	-6.16466	2.13841	-2.88283	0.00394125	0.0152047	N
chr18_59805476_59815571	18.1068	-4.1509	1.44008	-2.8824	0.00394659	0.0152171	N
chr1_165649724_165664634	2.75817	-5.78536	2.00777	-2.88148	0.00395809	0.0152437	N
chr10_74468041_74475660	72.2419	-3.17827	1.10299	-2.8815	0.00395782	0.0152437	N
chr16_11791981_11815526	2.9502	-5.88231	2.04165	-2.88116	0.00396212	0.0152437	Y
chr5_146070691_146080705	3.30736	-6.04742	2.09892	-2.88121	0.00396157	0.0152437	Y
chr8_128174167_128186609	4.76173	-6.57396	2.28212	-2.88063	0.0039688	0.0152611	Y
chr3_195686054_195686957	28.3245	8.80902	3.05841	2.88026	0.00397345	0.0152707	Y
chr1_212216335_212220759	4.52065	-6.23175	2.16387	-2.87991	0.00397787	0.0152794	Y
chr19_41088257_41089623	3.57364	6.01711	2.08987	2.87918	0.00398712	0.0153066	Y
chr3_40351362_40353660	3.24178	-6.01808	2.09075	-2.87843	0.00399662	0.0153348	Y
chr1_55637229_55643805	4.27519	-6.41738	2.22986	-2.87792	0.00400302	0.0153511	Y
chr12_133428204_133430159	9.07395	5.36092	1.86321	2.87726	0.00401151	0.015367	N
chr5_34175550_34182972	26.5263	-3.21503	1.11735	-2.87736	0.00401022	0.015367	Y
chr1_86241357_86252144	3.20334	-6.00154	2.08619	-2.8768	0.0040173	0.015376	Y
chr18_9927093_9937063	3.42265	-6.09653	2.11928	-2.8767	0.00401863	0.015376	Y
chr3_12353879_12422990	4.9192	-6.3777	2.21713	-2.87656	0.00402039	0.015376	Y
chr20_34284299_34286512	2.72556	-5.76907	2.00682	-2.87473	0.00404369	0.0154568	N
chr11_9492849_9501093	3.05521	-5.93254	2.0665	-2.87081	0.00409419	0.0156414	Y
chr8_141710990_141716304	58.1295	-1.08499	0.37799	-2.87043	0.00409917	0.015652	N
chr14_56746394_56757174	3.12475	-5.96546	2.07875	-2.86974	0.00410812	0.0156631	Y
chr15_56993131_56999504	3.60412	-6.17231	2.15099	-2.86952	0.00411094	0.0156631	Y
chr5_37153842_37154095	3.87698	-6.27748	2.18736	-2.86989	0.00410619	0.0156631	Y
chr6_141125372_141137367	2.8054	-5.81096	2.02501	-2.8696	0.00410994	0.0156631	Y
chr9_123945208_123955697	4.9901	-6.64122	2.31462	-2.86925	0.00411444	0.0156681	Y
chr14_50941795_50952912	20.3763	-1.93347	0.674056	-2.8684	0.00412547	0.0157016	Y
chr8_80182258_80204573	8.93334	7.46525	2.60319	2.86774	0.00413421	0.0157264	N
chr7_75728758_75730732	14.4629	3.60695	1.25806	2.86707	0.00414291	0.0157511	Y
chr1_44773982_44818597	2.73858	-5.7756	2.01563	-2.8654	0.00416477	0.0158257	N
chr14_50933301_50943024	2.76908	-5.79079	2.02176	-2.86423	0.00418026	0.015876	N
chr10_71977568_71978573	8.15045	-5.37769	1.87781	-2.86381	0.00418576	0.0158884	N
chr2_120885264_120932580	30.8549	-1.62203	0.566432	-2.8636	0.00418862	0.0158907	Y
chr12_11199619_11281962	6.28597	-6.53676	2.28289	-2.86337	0.00419159	0.0158935	N
chr10_103783234_103789502	7.33368	-5.7282	2.0009	-2.86281	0.004199	0.0159131	N
chr3_58351601_58368427	4.11046	-6.12906	2.14159	-2.86191	0.00421092	0.0159497	Y
chr12_120287978_120313985	3.45871	-6.11245	2.13618	-2.86139	0.00421783	0.0159673	Y
chr13_96622366_96648389	15.7681	-3.52643	1.23263	-2.8609	0.00422445	0.0159839	Y
chr12_117365828_117402659	2.99507	-5.90507	2.06476	-2.85994	0.00423725	0.0160237	N
chr14_81362062_81372425	217.752	0.444171	0.155344	2.85928	0.004246	0.0160482	N
chr17_50351394_50357514	2.84544	-5.83043	2.03982	-2.85831	0.00425899	0.0160888	Y
chr17_79937060_79943483	122.632	-0.780428	0.273104	-2.85762	0.00426826	0.0161152	N
chr1_179012850_179023773	8.10293	-6.71212	2.34964	-2.85665	0.00428132	0.0161559	N
chr6_42941741_42942776	53.6656	1.31332	0.459819	2.85616	0.00428793	0.0161722	Y
chr2_114697536_114699936	6.30058	-6.55846	2.29647	-2.85589	0.00429169	0.0161778	Y
chr3_195101738_195133645	48.8225	-1.41528	0.495876	-2.8541	0.00431589	0.0162517	N
chr10_31644073_31647262	4.84022	-6.29464	2.20544	-2.85415	0.00431528	0.0162517	Y
chr1_92786156_92811471	4.72123	-6.30661	2.21029	-2.8533	0.00432682	0.0162586	Y
chr12_19646734_19646920	3.50863	-5.93058	2.07848	-2.85332	0.00432645	0.0162586	Y
chr17_45043900_45047675	2.9331	-5.87429	2.05878	-2.85329	0.0043269	0.0162586	Y
chr5_78399987_78417175	3.28193	-6.03671	2.11545	-2.85362	0.00432235	0.0162586	Y
chr11_63960550_63962092	12.3635	4.4877	1.57482	2.84966	0.00437659	0.0164319	N
chr7_99672758_99675056	3.82994	5.99325	2.1032	2.84958	0.00437768	0.0164319	Y
chr9_119114985_119116072	2.79994	-5.80827	2.03862	-2.84912	0.0043841	0.0164473	Y
chr10_32150323_32199491	2.87424	5.82737	2.04661	2.84733	0.00440876	0.0165311	N
chr12_64456697_64480806	3.22988	-6.01298	2.11273	-2.84607	0.00442628	0.016588	Y
chr12_102301964_102308010	2.96781	-5.89055	2.0705	-2.84498	0.00444141	0.0166359	Y
chr1_1737914_1756921	2.74726	-5.77993	2.03391	-2.84178	0.00448624	0.0167772	N
chr5_137041681_137045545	2.74726	-5.77993	2.03391	-2.84178	0.00448624	0.0167772	N
chr10_64148155_64219556	2.80093	-5.80875	2.04388	-2.84202	0.00448292	0.0167772	Y
chr10_76002496_76158337	3.34108	-6.06156	2.13407	-2.84038	0.00450604	0.0168342	Y
chr5_54941617_54952602	3.52976	-6.14084	2.16199	-2.84036	0.00450623	0.0168342	Y
chr1_155927504_155928187	3.34207	-6.06198	2.13479	-2.83962	0.00451675	0.0168646	Y
chr8_15588175_15605974	2.92838	-5.87208	2.06961	-2.83729	0.00454977	0.0169789	Y
chr3_37170554_37196147	4.00528	-6.32404	2.22909	-2.83705	0.0045532	0.0169828	N
chr7_34994310_35013217	3.49995	-5.92664	2.08982	-2.83596	0.00456879	0.017032	Y
chr8_95897295_95897786	5.14992	-6.35896	2.24341	-2.83451	0.00458961	0.0171006	Y
chr1_212502477_212519275	3.05496	-5.93245	2.09334	-2.83397	0.00459737	0.0171114	Y
chr5_37238959_37239971	16.0206	-4.11516	1.45217	-2.8338	0.00459975	0.0171114	Y
chr9_115014958_115060196	3.05496	-5.93245	2.09334	-2.83397	0.00459737	0.0171114	Y
chr17_20922397_20931987	3.14	-5.97223	2.10854	-2.83239	0.0046201	0.017178	Y
chr10_86177527_86198463	91.7884	-3.08491	1.08954	-2.83139	0.00463459	0.0172138	N
chr19_11507920_11508273	6.92469	6.70416	2.36774	2.83146	0.00463353	0.0172138	N
chr5_126140468_126141388	4.66904	-6.28797	2.22114	-2.83097	0.00464077	0.0172278	Y
chr15_94841430_94858866	4.85514	-6.26455	2.21402	-2.82949	0.00466217	0.0172981	Y
chr16_89462185_89484776	5.56132	-6.39778	2.26161	-2.82886	0.00467147	0.0173236	Y
chr15_100692817_100695525	9.7162	7.37061	2.60567	2.82868	0.00467399	0.0173238	N
chr6_157357969_157406039	104.624	0.861068	0.304439	2.82837	0.00467855	0.0173317	N
chr1_78324623_78327007	5.18943	-6.36502	2.25089	-2.82778	0.00468717	0.0173516	Y
chr11_62649365_62655690	3.23534	-6.01534	2.12731	-2.82767	0.00468882	0.0173516	Y
chr2_9048751_9098771	47.0785	-2.202	0.778932	-2.82695	0.00469941	0.0173768	N
chr5_95099212_95119667	65.5281	-0.782284	0.276731	-2.82687	0.00470054	0.0173768	N
chr14_60582437_60592541	5.18412	-5.94194	2.10212	-2.82664	0.00470398	0.0173804	Y
chr12_50055749_50062337	3.0887	5.93095	2.09839	2.82642	0.00470713	0.017383	Y
chr16_28970038_28970421	6.08208	-5.94274	2.10301	-2.82583	0.00471582	0.017406	Y
chr18_8718422_8720494	75.6972	-0.873194	0.309048	-2.82543	0.0047217	0.0174187	N
chr5_677865_678179	3.79368	-5.99825	2.12437	-2.82355	0.0047495	0.0175121	Y
chr13_101881744_101944717	2.93272	-5.87412	2.08075	-2.82308	0.00475646	0.0175286	Y
chr3_120489575_120495511	4.75531	-6.26301	2.21967	-2.8216	0.00477845	0.0175921	Y
chrX_67316712_67339174	6.36113	-6.48651	2.29888	-2.82159	0.00477864	0.0175921	Y
chr16_1682213_1691188	3.71842	-6.21701	2.20364	-2.82125	0.00478371	0.0176016	Y
chr2_55209651_55214834	477.138	-0.529688	0.187853	-2.8197	0.00480688	0.0176633	N
chr2_208692947_208725986	3.92319	-6.06473	2.15084	-2.8197	0.00480681	0.0176633	Y
chr9_126519982_126641300	32.7123	-1.64112	0.582034	-2.81963	0.00480796	0.0176633	Y
chr3_135979321_136035906	2.72445	-5.76848	2.0467	-2.81843	0.00482585	0.0177198	N
chr17_489510_505136	7.56238	5.54814	1.96887	2.81793	0.00483336	0.017729	N
chr8_38994176_39009067	4.80359	-6.38939	2.26734	-2.81801	0.00483221	0.017729	Y
chr15_77544709_77578846	3.28472	-5.82147	2.06775	-2.81536	0.00487223	0.0178482	Y
chr2_24205766_24207701	52.4552	1.28165	0.455247	2.81528	0.00487341	0.0178482	Y
chr7_72159677_72178756	5.46775	-6.41705	2.27935	-2.8153	0.00487318	0.0178482	Y
chr12_4626227_4628046	10.1422	3.44018	1.2221	2.81498	0.00487805	0.0178559	N
chr3_33161836_33175757	3.27327	6.01898	2.13842	2.81469	0.00488247	0.0178629	Y
chr22_41670604_41677086	11.8635	4.25894	1.51352	2.81393	0.00489398	0.0178957	N
chr3_188472846_188478070	2.73313	-5.77284	2.05211	-2.81312	0.00490634	0.0179317	N
chr7_127447538_127528065	14.8169	-3.12975	1.11274	-2.81264	0.00491359	0.0179397	N
chr17_59924462_59938930	2.81717	-5.81668	2.06803	-2.81266	0.00491329	0.0179397	Y
chrX_85233771_85282561	5.7184	-6.41771	2.28246	-2.81175	0.00492725	0.0179803	Y
chr8_141856359_141874498	4.79982	-6.2792	2.2341	-2.81062	0.00494469	0.0180253	N
chr3_185404845_185407415	4.078	6.09939	2.17007	2.81069	0.00494354	0.0180253	Y
chr12_56493432_56494029	8.52073	5.70609	2.03192	2.80823	0.00498154	0.0181503	Y
chr12_27872741_27877119	5.99289	-5.76478	2.05319	-2.80771	0.00498951	0.01817	N
chr17_28808161_28811788	25.7663	1.62071	0.577335	2.80723	0.00499691	0.0181867	N
chr1_109884636_109888500	17.773	2.13503	0.760587	2.80708	0.00499921	0.0181867	Y
chr1_245180544_245246990	2.9233	-5.86966	2.09272	-2.8048	0.0050348	0.0182924	Y
chr18_74561482_74567157	5.77302	-6.41914	2.28869	-2.80472	0.00503604	0.0182924	Y
chr9_133364720_133370410	3.55466	-6.15184	2.19316	-2.80501	0.00503154	0.0182924	Y
chr5_72151601_72157741	5.71711	-6.44126	2.29677	-2.80449	0.00503965	0.0182962	Y
chr3_167422630_167443261	2.78334	-5.79789	2.0688	-2.80254	0.00507025	0.0183513	N
chr10_116091562_116093054	4.01877	6.31455	2.25294	2.8028	0.00506604	0.0183513	Y
chr17_49057107_49064598	14.4692	2.52758	0.901685	2.80317	0.00506026	0.0183513	Y
chr18_19112434_19112621	4.71049	-6.25341	2.23125	-2.80265	0.00506839	0.0183513	Y
chr18_19371335_19399607	2.98961	-5.90252	2.10562	-2.80322	0.00505952	0.0183513	Y
chr22_34157358_34161940	7.68921	6.53784	2.33284	2.80253	0.00507038	0.0183513	Y
chr13_95686859_95715113	3.60791	-5.97828	2.13437	-2.80096	0.00509509	0.0184219	N
chr3_33725851_33731424	58.5791	-1.78707	0.638004	-2.80104	0.00509383	0.0184219	Y
chr14_89178615_89181539	15.7121	3.23715	1.15619	2.79984	0.00511276	0.01847	N
chr12_110975949_110989773	3.62013	-6.17739	2.20642	-2.79974	0.00511441	0.01847	Y
chr2_72692289_72707879	35.1326	-1.27575	0.455686	-2.79962	0.00511621	0.01847	Y
chr11_68115315_68133170	42.5143	1.12591	0.402321	2.79854	0.00513338	0.0185225	N
chr6_112522809_112537670	4.07162	-6.34715	2.26845	-2.79801	0.00514183	0.0185436	Y
chr10_116247717_116251637	28.1575	1.23092	0.439953	2.79784	0.0051446	0.0185441	Y
chr8_1824737_1833873	12.0544	-3.53354	1.26314	-2.79741	0.00515135	0.018559	N
chr19_10246412_10246963	10.625	2.93699	1.04997	2.79722	0.00515444	0.0185607	N
chr5_37173857_37176088	2.87831	-5.8463	2.09042	-2.79671	0.00516266	0.0185809	Y
chr5_38510566_38530768	2.7857	-5.79906	2.07464	-2.79521	0.00518653	0.0186573	N
chr6_131481199_131490413	2.96992	-5.89157	2.10794	-2.79494	0.00519099	0.0186639	Y
chr17_80842021_80869665	110.983	0.727614	0.26039	2.79432	0.00520083	0.0186898	N
chr17_15580490_15586471	3.55955	-5.88188	2.10555	-2.79351	0.00521398	0.0187275	Y
chr3_194140068_194140541	3.94976	-6.012	2.15255	-2.79296	0.00522281	0.0187497	Y
chr18_8076453_8114825	3.52629	-6.13949	2.19839	-2.79272	0.00522677	0.0187544	Y
chr1_65278421_65280523	6.4631	-6.5338	2.34036	-2.79179	0.0052417	0.0187985	Y
chrX_22129585_22151741	7.01054	-6.62862	2.3757	-2.79018	0.00526794	0.018883	N
chr15_94841430_94841959	28.103	-2.9398	1.05418	-2.78871	0.00529187	0.0189592	Y
chr7_56150971_56151408	11.9391	3.41066	1.22324	2.78821	0.00530003	0.0189788	N
chr10_30736711_30740673	3.1219	-5.9642	2.14044	-2.78644	0.00532904	0.0190731	Y
chr10_17636204_17646046	3.97196	-6.31144	2.26545	-2.78596	0.00533695	0.0190917	Y
chr6_169982932_170038756	3.46149	-5.8332	2.09432	-2.78525	0.00534865	0.0191239	Y
chr12_124904503_124934413	4.21953	-6.11158	2.19508	-2.78422	0.00536567	0.0191751	Y
chr3_141259375_141278837	6.91247	6.46224	2.32188	2.7832	0.00538264	0.0192261	Y
chr4_128590191_128609022	29.8419	-2.39474	0.860549	-2.7828	0.00538922	0.0192398	N
chr3_11643307_11744521	2.96657	-5.89002	2.1174	-2.78172	0.00540712	0.019294	Y
chr17_80828100_80869665	21.8951	2.21429	0.796198	2.78108	0.00541776	0.019322	N
chr2_72945232_72945436	2.78248	-5.79747	2.08473	-2.78093	0.00542042	0.019322	N
chr19_21368809_21369090	2.96038	-5.88711	2.11719	-2.78062	0.0054255	0.0193304	N
chr14_31139462_31169464	5.03659	-6.26337	2.25351	-2.77938	0.00544628	0.0193942	Y
chr7_79828541_79842185	3.5202	-6.1382	2.2086	-2.77922	0.00544889	0.0193942	Y
chr3_138244332_138256189	23.8302	1.59163	0.572879	2.7783	0.00546446	0.0194399	Y
chr16_142594_143323	7.26407	-5.51416	1.9854	-2.77735	0.00548033	0.0194865	N
chr11_28420335_28445911	3.36207	-5.78216	2.08236	-2.77674	0.00549071	0.0195136	Y
chr1_54284644_54298264	4.24075	-6.18242	2.22722	-2.77584	0.00550587	0.0195577	Y
chr2_45773871_45780869	27.7292	1.48377	0.535102	2.77287	0.00555638	0.0197272	N
chr10_70411603_70433244	11.8118	4.72968	1.70634	2.77183	0.00557428	0.0197809	N
chr11_62549366_62550297	19.1321	1.60686	0.579819	2.77131	0.00558318	0.0198026	N
chrX_77270159_77275895	27.9283	-1.77125	0.639183	-2.77111	0.00558657	0.0198046	N
chr10_1130343_1151207	35.8518	1.57725	0.56942	2.76992	0.00560706	0.0198611	N
[truncated: 5,088 more rows]

## Sheet: NCM460_vs_SW640
ID	baseMean	log2FoldChange	lfcSE	stat	pvalue	padj	DE in Jiang et al., 2018 (Y=yes, N=no)
chr2_72945232_72960247	765.624	-2.8258	0.117164	-24.1184	1.60474e-128	1.13664e-124	Y
chr3_98568305_98600611	394.773	4.03092	0.211114	19.0935	2.85784e-81	1.0121e-77	Y
chr5_137320946_137324004	1103.72	-1.62361	0.0859129	-18.8983	1.17792e-79	2.78108e-76	Y
chr5_32135678_32143986	428.692	-2.56851	0.137916	-18.6238	2.06171e-77	3.65078e-74	Y
chr5_65284463_65290692	705.855	-2.78622	0.154759	-18.0037	1.82362e-72	2.58334e-69	Y
chr17_79660684_79661883	221.742	3.93265	0.221275	17.7727	1.14981e-70	1.35735e-67	Y
chr7_99621042_99621930	362.587	2.20863	0.133717	16.5172	2.75753e-61	2.79023e-58	Y
chr13_111274563_111276626	326.611	3.05125	0.190371	16.0279	8.15321e-58	7.21865e-55	Y
chr18_9931807_9937063	479.83	-2.07284	0.129543	-16.0012	1.25408e-57	9.86958e-55	Y
chr11_68115315_68115711	664.055	5.65168	0.371501	15.2131	2.89594e-52	2.05119e-49	Y
chr5_21491430_21497305	296.55	-2.16882	0.142797	-15.1882	4.2357e-52	2.72741e-49	Y
chr15_89656956_89659752	470.15	2.29245	0.155609	14.7321	4.00955e-49	2.36664e-46	Y
chr10_32197100_32199491	1204.31	2.12165	0.146643	14.4681	1.92651e-47	1.04965e-44	Y
chr2_135010666_135012215	166.971	3.7317	0.258969	14.4098	4.48739e-47	2.2703e-44	Y
chr8_141889570_141900868	137.406	-3.34537	0.249994	-13.3818	7.72434e-41	3.64743e-38	Y
chr13_47297356_47308133	100.527	4.7805	0.367002	13.0258	8.7292e-39	3.86431e-36	Y
chr21_16386665_16415895	487.411	-2.44684	0.190325	-12.8561	7.94495e-38	3.31024e-35	Y
chr1_12638746_12639440	152.154	-3.01161	0.237659	-12.672	8.45471e-37	3.32693e-34	Y
chr3_138289160_138291826	235.56	-3.52261	0.279804	-12.5896	2.41031e-36	8.98539e-34	Y
chr16_69404386_69406258	196.666	2.41774	0.193496	12.495	7.9467e-36	2.81432e-33	Y
chr1_52959283_52975384	392.207	-1.74087	0.140584	-12.3831	3.22491e-35	1.08772e-32	Y
chr5_619105_620376	341.009	-2.81428	0.228981	-12.2905	1.01924e-34	3.28148e-32	Y
chr5_1488506_1501718	108.781	-3.27413	0.269829	-12.1341	6.96721e-34	2.1456e-31	Y
chr3_196118684_196129890	422.478	-2.30725	0.192961	-11.9571	5.96319e-33	1.75989e-30	Y
chr13_33091994_33101669	419.384	-1.53059	0.128138	-11.9449	6.90721e-33	1.95695e-30	Y
chr5_170305101_170323119	198.865	-2.56231	0.216611	-11.8291	2.76203e-32	7.52441e-30	Y
chr5_95091100_95099324	356.582	-1.75563	0.148856	-11.7942	4.18347e-32	1.09746e-29	Y
chr2_207144264_207162097	224.64	-2.06867	0.176484	-11.7216	9.88423e-32	2.50036e-29	Y
chr11_70505933_70507783	109.127	6.90403	0.600505	11.497	1.36526e-30	3.33453e-28	Y
chr7_716866_751164	955.694	1.66812	0.145274	11.4826	1.61411e-30	3.81091e-28	Y
chr11_66407171_66407594	862.219	-1.47112	0.131039	-11.2266	3.0194e-29	6.89885e-27	Y
chr17_57842332_57851246	202.271	-4.06062	0.373487	-10.8722	1.56403e-27	3.46188e-25	Y
chr12_28458582_28460682	525.975	-1.53962	0.142064	-10.8375	2.28698e-27	4.90869e-25	Y
chr5_65284463_65310553	108.849	-3.4625	0.320039	-10.819	2.79748e-27	5.8278e-25	Y
chr3_4452549_4461830	93.2308	-3.28679	0.30388	-10.8161	2.88869e-27	5.84589e-25	Y
chr1_94107860_94140497	87.6913	-4.51837	0.419663	-10.7667	4.9455e-27	9.73026e-25	Y
chr22_25771780_25777545	238.947	2.37486	0.223465	10.6274	2.2219e-26	4.25343e-24	Y
chr10_93185038_93221941	89.4885	-6.18835	0.586461	-10.552	4.9716e-26	9.2668e-24	Y
chr20_30954187_30959677	393.079	-1.62319	0.15393	-10.545	5.35678e-26	9.72874e-24	Y
chr5_72151601_72161556	96.1254	-5.02475	0.477461	-10.5239	6.70382e-26	1.182e-23	Y
chr8_141874411_141900868	239.918	-1.91099	0.181619	-10.522	6.84202e-26	1.182e-23	Y
chr22_30032740_30038274	169.261	-2.31468	0.222661	-10.3955	2.59829e-25	4.38183e-23	Y
chr4_103225474_103236987	291.425	-3.29588	0.31806	-10.3624	3.67491e-25	6.05335e-23	Y
chr20_30954187_30956926	1145.46	-1.32347	0.128232	-10.3208	5.67225e-25	9.13103e-23	Y
chr12_51173923_51203372	155.674	-2.38527	0.231215	-10.3162	5.95086e-25	9.36665e-23	Y
chr1_94032836_94033408	212.492	-2.79452	0.273853	-10.2045	1.89379e-24	2.91603e-22	Y
chr5_34179118_34182972	113.156	7.95347	0.782317	10.1666	2.79617e-24	4.21389e-22	Y
chr6_10703638_10705077	113.488	2.82073	0.28045	10.0579	8.48253e-24	1.2517e-21	Y
chr12_120592774_120593523	667.984	1.19396	0.119544	9.98762	1.72683e-23	2.49615e-21	Y
chr5_167915607_167921655	83.63	-2.82942	0.285085	-9.92483	3.24661e-23	4.59915e-21	Y
chr20_21346059_21349228	103.036	2.70836	0.273771	9.89281	4.47308e-23	6.21232e-21	Y
chr11_46515158_46534363	134.173	-2.93348	0.296957	-9.87848	5.16105e-23	7.02995e-21	Y
chr13_76134889_76143643	222.203	1.78879	0.181217	9.87096	5.56304e-23	7.43453e-21	Y
chr6_34574332_34574681	257.119	-2.33983	0.238283	-9.81954	9.27674e-23	1.2168e-20	Y
chr3_171830242_171851336	81.2119	-3.61466	0.370122	-9.76613	1.57341e-22	2.02627e-20	Y
chr12_111990084_111993723	568.814	-1.54965	0.158748	-9.76174	1.64318e-22	2.07832e-20	Y
chr22_46085592_46114373	414.734	-1.58918	0.163596	-9.714	2.62805e-22	3.2657e-20	Y
chr10_5827105_5842668	279.983	2.08417	0.215963	9.65058	4.88783e-22	5.96905e-20	Y
chr21_35475134_35497780	89.3338	3.52058	0.366035	9.61813	6.70409e-22	8.04832e-20	Y
chr2_171538905_171539569	197.863	11.533	1.20025	9.6088	7.34003e-22	8.55669e-20	Y
chr3_196842798_196846401	472.23	-1.37607	0.143216	-9.60839	7.36917e-22	8.55669e-20	Y
chr11_14793483_14810788	66.7853	3.02516	0.316758	9.55038	1.29215e-21	1.47618e-19	Y
chr10_7318854_7327916	192.648	-11.1963	1.19014	-9.40754	5.07898e-21	5.71023e-19	Y
chr11_128932175_128936763	99.3728	2.64127	0.281574	9.38036	6.57463e-21	7.27626e-19	Y
chrX_53672263_53681075	654.951	-1.08103	0.115667	-9.34613	9.09173e-21	9.90719e-19	Y
chr19_1031070_1032695	153.975	2.34992	0.256802	9.15069	5.65721e-20	6.07121e-18	Y
chr4_6925100_6925838	154.875	2.294	0.251622	9.11686	7.73358e-20	8.17567e-18	Y
chr6_57372288_57398317	90.7067	-3.04646	0.335295	-9.08591	1.02835e-19	1.07115e-17	NA
chr8_131370263_131374017	185.769	-4.68461	0.518599	-9.03319	1.66735e-19	1.71158e-17	Y
chr11_62406455_62407203	156.614	2.5165	0.279763	8.99512	2.35969e-19	2.38767e-17	Y
chr11_128993341_129034322	231.578	1.62835	0.18265	8.91515	4.87138e-19	4.85971e-17	Y
chr9_137582758_137593179	130.747	-10.6367	1.19413	-8.9075	5.21941e-19	5.1346e-17	Y
chr5_38991051_39003724	138.932	-2.62471	0.295417	-8.88476	6.40608e-19	6.15491e-17	Y
chr6_159004986_159010814	760.312	1.12787	0.12695	8.88434	6.43037e-19	6.15491e-17	Y
chr14_80963812_80997230	114.174	-2.66749	0.301156	-8.85749	8.1834e-19	7.7284e-17	Y
chr22_28692186_28693840	112.39	-10.4187	1.1965	-8.70771	3.10073e-18	2.8898e-16	Y
chr2_148730308_148739650	102.199	-2.50236	0.288655	-8.66903	4.35821e-18	4.00899e-16	Y
chr8_26439485_26441499	341.167	-1.80968	0.209891	-8.62198	6.58051e-18	5.97561e-16	Y
chr5_60768508_60768864	125.356	-2.29585	0.266852	-8.60346	7.73463e-18	6.93473e-16	Y
chr17_982570_1003975	63.528	3.64909	0.426724	8.55141	1.21597e-17	1.07659e-15	Y
chr8_48320423_48353104	105.53	-2.47672	0.293842	-8.42875	3.4937e-17	3.05505e-15	Y
chr16_70497072_70497677	91.2303	2.44193	0.290249	8.41323	3.98872e-17	3.44538e-15	Y
chr20_62407031_62422143	528.692	1.86975	0.222836	8.39072	4.83174e-17	4.12328e-15	Y
chr4_6925100_6969151	177.767	2.07697	0.248197	8.36823	5.84907e-17	4.93202e-15	Y
chr17_28934570_28937960	77.2317	-2.53338	0.30392	-8.33569	7.70474e-17	6.42032e-15	Y
chr18_12999420_13019205	88.1135	10.0037	1.20672	8.28995	1.13294e-16	9.33093e-15	Y
chr16_47531310_47549512	349.055	-1.38193	0.166743	-8.28778	1.15381e-16	9.39357e-15	Y
chr12_28378728_28412375	82.491	-9.9725	1.20493	-8.2764	1.26951e-16	1.02181e-14	Y
chr7_22999875_23030758	67.8506	-4.88068	0.591811	-8.24701	1.62404e-16	1.29248e-14	Y
chr4_7870349_7873807	150.394	-1.9198	0.234756	-8.17782	2.89015e-16	2.27455e-14	Y
chr3_67546222_67559327	136.245	-2.20051	0.269345	-8.16986	3.08751e-16	2.40317e-14	Y
chr10_5815805_5842668	170.182	1.42884	0.175047	8.16262	3.27841e-16	2.52402e-14	Y
chr5_170610199_170632616	190.772	-1.78068	0.218232	-8.15956	3.36252e-16	2.56094e-14	Y
chr3_138289160_138291774	148.404	9.70083	1.19451	8.12115	4.61769e-16	3.47948e-14	Y
chr8_15508206_15531345	72.9248	-9.79473	1.20808	-8.10769	5.15916e-16	3.84656e-14	Y
chr11_106849345_106856857	71.1499	-9.75897	1.20631	-8.08996	5.96846e-16	4.4036e-14	Y
chr2_36668401_36669878	99.2881	-9.66012	1.19484	-8.08485	6.22409e-16	4.54487e-14	Y
chr3_183056588_183107567	75.0503	-5.99246	0.744164	-8.0526	8.10533e-16	5.85817e-14	Y
chr14_71880665_71996087	141.739	-2.14575	0.267381	-8.02509	1.01453e-15	7.25849e-14	Y
chr13_113170754_113181798	279.331	1.73517	0.216264	8.0234	1.02857e-15	7.28539e-14	Y
chr12_116534474_116549317	149.81	-1.89034	0.235809	-8.01637	1.08919e-15	7.63834e-14	Y
chr10_94653106_94659401	159.025	-1.86069	0.232374	-8.00731	1.17244e-15	8.14155e-14	Y
chr22_46085592_46098727	200.913	-1.8287	0.228878	-7.98981	1.35146e-15	9.29359e-14	Y
chr5_38523521_38530768	69.4821	-9.72454	1.22526	-7.9367	2.07633e-15	1.4141e-13	Y
chr9_139115853_139118720	60.2842	2.60336	0.331976	7.842	4.43421e-15	2.99119e-13	Y
chr17_49118862_49133843	140.066	-1.7742	0.226341	-7.83865	4.55423e-15	3.02602e-13	Y
chr2_225400245_225422573	193.864	-1.56873	0.20017	-7.83701	4.614e-15	3.02602e-13	Y
chr3_183097085_183107567	79.2542	-9.48603	1.21027	-7.83796	4.57942e-15	3.02602e-13	Y
chr20_16506737_16509085	88.3035	2.31695	0.295969	7.82837	4.94239e-15	3.21165e-13	Y
chr3_31617888_31621588	560.366	-0.947215	0.121578	-7.79103	6.6465e-15	4.27974e-13	N
chr13_103275227_103280274	62.2399	2.53856	0.32761	7.74872	9.2822e-15	5.92305e-13	Y
chr11_128963516_129034322	108.698	1.74185	0.22601	7.70694	1.28871e-14	8.14991e-13	Y
chr17_80842021_80861354	318.471	-1.50318	0.196368	-7.6549	1.93467e-14	1.21268e-12	Y
chr12_116668338_116675510	318.183	-1.48968	0.195824	-7.60725	2.79989e-14	1.73262e-12	Y
chr19_52785364_52786666	60.92	2.76679	0.363733	7.60664	2.81309e-14	1.73262e-12	Y
chr9_6814631_6893232	45.8376	4.36907	0.57567	7.58954	3.21045e-14	1.96031e-12	Y
chr12_19626182_19653155	76.1871	-4.31237	0.568808	-7.58141	3.41824e-14	2.05181e-12	Y
chr3_111632166_111639266	86.8532	-9.13867	1.20525	-7.58238	3.3926e-14	2.05181e-12	Y
chr2_206305094_206305396	58.7723	-9.27242	1.22828	-7.54908	4.38334e-14	2.60901e-12	Y
chr10_7285520_7327916	48.882	-9.21758	1.22326	-7.53528	4.87283e-14	2.87619e-12	Y
chr5_176370336_176378578	89.7781	9.05685	1.20455	7.51887	5.52498e-14	3.23417e-12	Y
chr3_31617888_31641951	88.1357	-2.4903	0.331891	-7.50336	6.22029e-14	3.61134e-12	Y
chr6_20781376_20846409	38.5985	9.2957	1.23935	7.50049	6.35798e-14	3.66127e-12	Y
chr6_155095123_155116273	70.6687	3.45325	0.462223	7.47096	7.96106e-14	4.54743e-12	Y
chr3_68040704_68055887	46.9859	-9.16063	1.22752	-7.46269	8.47762e-14	4.80376e-12	Y
chr5_142779221_142780417	49.2789	-9.2288	1.24243	-7.42804	1.10219e-13	6.19589e-12	Y
chr5_95099212_95119667	65.5281	-2.51398	0.339549	-7.40388	1.32261e-13	7.37644e-12	Y
chr8_141856359_141900868	270.451	-1.31008	0.177465	-7.38218	1.55724e-13	8.61714e-12	Y
chr1_85816098_85824530	66.7799	-3.50346	0.474799	-7.37883	1.59691e-13	8.76816e-12	Y
chr2_10281981_10282502	53.8011	4.0813	0.55524	7.35052	1.97432e-13	1.0757e-11	Y
chr3_98600384_98611450	64.2791	6.12357	0.833549	7.34638	2.03646e-13	1.10109e-11	Y
chr7_155295716_155301792	38.6108	9.119	1.24765	7.30897	2.69201e-13	1.44451e-11	Y
chr5_118264232_118280344	57.2218	-2.73557	0.379246	-7.21316	5.46673e-13	2.91134e-11	Y
chr15_80412670_80415142	353.095	-1.37945	0.191987	-7.18511	6.71538e-13	3.54963e-11	Y
chr15_72837161_72864506	49.9209	-3.36972	0.469733	-7.17368	7.30068e-13	3.80226e-11	Y
chr3_51575514_51586079	77.2488	-2.14217	0.298579	-7.17454	7.25506e-13	3.80226e-11	Y
chr16_1004357_1004666	169.543	1.69277	0.236301	7.16362	7.85759e-13	4.06243e-11	Y
chr2_170401231_170413807	53.0276	2.66367	0.37266	7.14771	8.82373e-13	4.49629e-11	Y
chr9_98740343_98766983	207.941	-2.07846	0.29075	-7.14863	8.76498e-13	4.49629e-11	Y
chr21_38792601_38802702	181.108	-1.34103	0.187675	-7.14547	8.96878e-13	4.53756e-11	Y
chr22_46096162_46136418	110.752	-2.04173	0.286571	-7.12471	1.043e-12	5.23943e-11	Y
chr3_171830242_171944737	40.6977	-8.64328	1.2187	-7.09224	1.31959e-12	6.58216e-11	Y
chr2_143642918_143685310	39.0383	-8.8929	1.25472	-7.08755	1.36508e-12	6.76143e-11	Y
chr2_227771509_227779067	36.9349	9.24377	1.30582	7.07889	1.45317e-12	7.14777e-11	Y
chr14_55168780_55169298	87.5144	-8.50047	1.20298	-7.06617	1.59268e-12	7.77995e-11	Y
chr7_30395344_30405911	50.499	-6.29073	0.891695	-7.0548	1.72851e-12	8.38563e-11	Y
chr12_65720606_65762806	45.4524	-4.42383	0.631175	-7.00888	2.40234e-12	1.15754e-10	Y
chr1_23356962_23377013	311.789	-1.21903	0.174032	-7.00461	2.4768e-12	1.18535e-10	Y
chr11_68153784_68157520	56.0085	4.71651	0.674578	6.9918	2.71383e-12	1.29007e-10	Y
chr2_53628798_53642744	36.7203	-8.80498	1.26211	-6.97638	3.02875e-12	1.43018e-10	Y
chr1_179100446_179102509	81.9576	-1.87036	0.268985	-6.9534	3.56581e-12	1.67263e-10	Y
chr19_58904343_58904854	187.697	2.25479	0.32465	6.94531	3.77635e-12	1.75973e-10	Y
chr5_40728447_40730445	95.1242	-1.85162	0.268546	-6.89496	5.38804e-12	2.49435e-10	Y
chr5_73136305_73136585	77.8245	-2.12471	0.310689	-6.83868	7.99255e-12	3.67605e-10	Y
chr6_161443042_161455481	162.743	-1.97469	0.289014	-6.8325	8.34456e-12	3.8132e-10	Y
chr7_810108_814799	52.0635	2.86674	0.421088	6.80794	9.90093e-12	4.4954e-10	Y
chr9_74817487_74828907	33.401	-8.66835	1.27504	-6.79851	1.05703e-11	4.76876e-10	Y
chr15_75215989_75219228	55.058	-3.03881	0.447274	-6.79406	1.09022e-11	4.88737e-10	Y
chr3_98600384_98609300	41.8318	5.43483	0.800485	6.78943	1.12578e-11	5.01501e-10	Y
chr11_119002245_119003929	42.8699	3.35833	0.49568	6.77519	1.24245e-11	5.50016e-10	Y
chr20_33954360_33971936	139.96	1.58332	0.233971	6.76717	1.31325e-11	5.77747e-10	Y
chr17_79937060_79943483	122.632	1.72437	0.255739	6.7427	1.55473e-11	6.79761e-10	Y
chr5_179688684_179707608	126.934	-2.04382	0.304863	-6.70406	2.02702e-11	8.80819e-10	Y
chr2_36623757_36669878	49.827	-5.95335	0.889333	-6.69417	2.16894e-11	9.36743e-10	Y
chr18_45391430_45396935	77.2704	-2.53794	0.379557	-6.68659	2.28427e-11	9.80576e-10	Y
chr11_128993341_128994789	102.93	2.48889	0.373058	6.6716	2.53025e-11	1.07962e-09	Y
chr19_11230768_11231198	82.9596	1.90914	0.286202	6.67062	2.54731e-11	1.0804e-09	Y
chr7_104678573_104681470	112.56	-2.14135	0.321379	-6.663	2.6829e-11	1.13113e-09	Y
chr10_72285679_72291210	27.0717	8.6102	1.29427	6.65253	2.88091e-11	1.20743e-09	Y
chr5_72157635_72161556	57.71	-2.47325	0.372072	-6.64724	2.9864e-11	1.24428e-09	Y
chr7_128281257_128289036	69.1197	8.06321	1.21402	6.64175	3.09977e-11	1.28396e-09	Y
chr1_94360170_94367225	65.0182	-2.32998	0.350989	-6.63834	3.17225e-11	1.30634e-09	Y
chr1_19244856_19246267	64.6699	8.31264	1.25273	6.63563	3.23112e-11	1.32289e-09	Y
chr19_11258494_11258789	36.2447	5.24573	0.792051	6.62297	3.52045e-11	1.43306e-09	Y
chr16_16101673_16110478	48.156	-2.31978	0.350678	-6.61512	3.71242e-11	1.50258e-09	Y
chr14_84112888_84132553	32.3213	-8.62087	1.30387	-6.61175	3.79796e-11	1.52846e-09	Y
chr5_353845_376831	283.689	7.95846	1.20683	6.59449	4.26712e-11	1.70757e-09	Y
chr16_19234367_19236160	29.7556	-8.50159	1.29534	-6.56323	5.2655e-11	2.09526e-09	Y
chr21_37775056_37783902	60.3264	2.58938	0.395373	6.5492	5.78463e-11	2.28897e-09	Y
chr5_111594926_111602027	45.2823	-7.96777	1.21769	-6.54336	6.0153e-11	2.36702e-09	Y
chr2_11426665_11428575	41.999	-8.04512	1.23016	-6.5399	6.1562e-11	2.40908e-09	Y
chr10_11893996_11894214	43.1509	-8.06744	1.23527	-6.5309	6.53737e-11	2.54418e-09	Y
chr3_142455221_142467302	145.261	-1.90783	0.292579	-6.52075	6.99583e-11	2.70773e-09	Y
chr4_78694235_78697546	107.103	-1.49761	0.230018	-6.51083	7.47387e-11	2.87704e-09	Y
chr18_8076453_8088849	28.2758	-8.42785	1.2959	-6.50346	7.84953e-11	2.98915e-09	Y
chr4_79186179_79188586	31.6407	8.57087	1.31778	6.504	7.82102e-11	2.98915e-09	Y
chr3_78987751_78988077	21.555	8.73587	1.34522	6.49399	8.35923e-11	3.16623e-09	Y
chr16_15973661_15978062	84.2992	-2.61538	0.403843	-6.47624	9.40343e-11	3.54279e-09	Y
chr18_8113484_8143777	27.0963	-8.36635	1.29782	-6.44647	1.14486e-10	4.29049e-09	Y
chr3_4403723_4418073	30.3605	-8.34502	1.29484	-6.44481	1.15742e-10	4.31476e-09	Y
chr7_157449049_157475629	32.8958	9.224	1.43313	6.43624	1.22469e-10	4.53157e-09	Y
chr9_111868788_111870850	86.0273	-1.63108	0.253439	-6.43578	1.22838e-10	4.53157e-09	Y
chr11_68115315_68133170	42.5143	2.52661	0.393668	6.41814	1.37948e-10	5.03651e-09	Y
chr17_77642782_77647218	27.3263	-8.37885	1.3054	-6.4186	1.37533e-10	5.03651e-09	Y
chr17_80992911_81006661	58.2722	-2.30052	0.358857	-6.4107	1.44853e-10	5.26152e-09	Y
chr12_28458582_28544344	72.0827	-2.86525	0.447449	-6.40353	1.51828e-10	5.48672e-09	Y
chr12_39223181_39268313	26.0537	-8.30984	1.29853	-6.39941	1.55976e-10	5.60799e-09	Y
chr4_140046318_140060651	40.1634	-5.35159	0.836408	-6.3983	1.57115e-10	5.62043e-09	Y
chr12_19615444_19626289	123.632	-2.13274	0.333488	-6.39525	1.60281e-10	5.70487e-09	Y
chr9_20819795_20823114	208.442	-1.40511	0.219817	-6.39217	1.63546e-10	5.79198e-09	Y
chr9_6849507_6893232	58.4712	2.20391	0.344905	6.38992	1.65972e-10	5.84865e-09	Y
chr7_42187825_42188067	319.602	-7.62707	1.19537	-6.38053	1.76471e-10	6.18782e-09	Y
chr1_214089278_214139627	22.9225	8.82406	1.39214	6.33849	2.32021e-10	8.09558e-09	Y
chr4_154191487_154197282	38.3139	-5.06278	0.799166	-6.33508	2.37215e-10	8.23623e-09	Y
chr3_31917925_31921322	172.766	-1.65034	0.260793	-6.32816	2.48108e-10	8.57244e-09	Y
chr1_29362338_29365938	51.843	2.45582	0.388653	6.3188	2.63606e-10	9.06368e-09	Y
chr11_72468812_72470426	32.5917	9.18147	1.45466	6.31178	2.75839e-10	9.43849e-09	Y
chr1_94685814_94697199	33.2834	-4.8127	0.762715	-6.30996	2.79109e-10	9.50448e-09	Y
chr16_792250_792543	302.258	1.75301	0.278076	6.30405	2.89958e-10	9.77986e-09	Y
chr5_127782174_127866386	25.2819	-8.26632	1.31122	-6.30431	2.89477e-10	9.77986e-09	Y
chr12_11181000_11199787	91.6158	-3.12303	0.495861	-6.29819	3.01138e-10	1.01088e-08	Y
chr9_74825603_74834422	30.7592	-6.0799	0.967428	-6.28461	3.28685e-10	1.09815e-08	Y
chr22_28692186_28702631	25.6537	-8.28777	1.32601	-6.25016	4.10022e-10	1.36347e-08	Y
chr12_46622936_46637097	951.812	-0.92924	0.148891	-6.24106	4.34613e-10	1.43849e-08	N
chr10_12442015_12445368	24.8659	-8.24229	1.32216	-6.23396	4.548e-10	1.4983e-08	Y
chr7_1937836_1976533	179.672	1.20502	0.193699	6.22111	4.93644e-10	1.61874e-08	Y
chr10_1130343_1142186	151.369	1.55109	0.249662	6.21276	5.20625e-10	1.69935e-08	Y
chr9_88233898_88248289	142.203	-4.59293	0.740052	-6.20623	5.42715e-10	1.76333e-08	Y
chr18_21644104_21649235	325.969	-0.828999	0.13373	-6.19907	5.67977e-10	1.83698e-08	N
chr22_50810449_50832564	73.1162	-2.78737	0.450354	-6.1893	6.04316e-10	1.93736e-08	Y
chr5_176370336_176385155	598.252	-1.04381	0.168648	-6.18926	6.04484e-10	1.93736e-08	Y
chr2_176835492_176860374	54.9016	-3.6005	0.58198	-6.18664	6.14617e-10	1.96096e-08	Y
chr13_33306238_33309467	136.977	-1.8324	0.296524	-6.17959	6.42699e-10	2.04136e-08	Y
chr7_73770740_73771807	106.968	2.70347	0.43782	6.17484	6.62308e-10	2.09425e-08	Y
chr17_62817885_62818511	81.1107	2.5164	0.407923	6.16881	6.88078e-10	2.16607e-08	Y
chr14_103470265_103478525	77.8975	-3.28266	0.534235	-6.14461	8.01583e-10	2.51222e-08	N
chr7_80418622_80440017	23.6532	-8.16997	1.33088	-6.13878	8.3157e-10	2.59472e-08	Y
chr5_154330381_154346797	29.7649	4.54844	0.741338	6.13545	8.49161e-10	2.63798e-08	N
chr10_5827815_5842668	41.5565	2.7648	0.45162	6.12196	9.24284e-10	2.85726e-08	Y
chr7_618893_751164	43.5463	4.01913	0.656575	6.12136	9.27812e-10	2.85726e-08	Y
chr12_936208_939326	98.9856	-1.67316	0.27369	-6.11335	9.75632e-10	2.99152e-08	Y
chr8_95676925_95677424	20.2308	8.10262	1.32828	6.1001	1.06001e-09	3.23623e-08	Y
chr17_80828100_80858607	90.0876	2.04895	0.33641	6.09063	1.12464e-09	3.41881e-08	Y
chr22_28910745_28915308	22.407	-8.09201	1.33127	-6.07843	1.21363e-09	3.67358e-08	Y
chr10_5836848_5842668	118.433	1.38281	0.227739	6.07189	1.26415e-09	3.80974e-08	Y
chr3_11399892_11468400	135.87	-1.60435	0.264255	-6.07123	1.26938e-09	3.80974e-08	Y
chr12_113541751_113542103	20.596	7.92925	1.30673	6.06802	1.29494e-09	3.87006e-08	N
chr3_183361268_183369064	50.8031	-3.21386	0.531623	-6.04537	1.4907e-09	4.43639e-08	Y
chr1_1192372_1192690	74.8244	2.3901	0.395668	6.04066	1.53485e-09	4.54868e-08	Y
chr1_115005726_115007010	84.5926	-1.73772	0.287818	-6.03757	1.56448e-09	4.61716e-08	Y
chr7_64004085_64004810	117.577	1.85234	0.308126	6.01162	1.8368e-09	5.39837e-08	Y
chr6_57393112_57398317	78.3834	-2.25977	0.376511	-6.00187	1.95054e-09	5.70897e-08	NA
chr1_165648679_165652347	25.5269	-7.81314	1.30724	-5.9768	2.27566e-09	6.63312e-08	Y
chr11_102233627_102239279	46.9655	3.10042	0.519277	5.97064	2.3632e-09	6.86007e-08	Y
chr11_63426233_63426724	60.0943	-3.75412	0.629143	-5.96705	2.41589e-09	6.96402e-08	Y
chr20_62421174_62422143	170.789	1.92218	0.322142	5.96686	2.41868e-09	6.96402e-08	Y
chr1_32745272_32745811	18.1031	8.48359	1.42338	5.96017	2.51973e-09	7.20571e-08	Y
chr2_172782047_172809519	44.5229	-2.11471	0.354819	-5.95996	2.52297e-09	7.20571e-08	Y
chr8_141357856_141370292	141.518	2.09251	0.351938	5.94567	2.75325e-09	7.83184e-08	Y
chr15_69728477_69729061	97.0246	1.41817	0.238711	5.94094	2.83389e-09	8.02897e-08	Y
chr19_20327949_20331226	17.1481	8.40564	1.4166	5.93368	2.96215e-09	8.35892e-08	Y
chr1_78183552_78191447	24.6338	-7.55741	1.27457	-5.92939	3.04054e-09	8.54608e-08	Y
chr9_21476898_21477291	24.3781	-7.70951	1.30091	-5.92626	3.09919e-09	8.67651e-08	Y
chr4_41496553_41553412	21.3034	-8.01915	1.35451	-5.92032	3.21311e-09	8.96002e-08	Y
chr13_101936284_101944717	21.7137	-8.04681	1.36384	-5.90012	3.6323e-09	1.00893e-07	Y
chr10_69902697_69909868	20.5578	-7.96805	1.35217	-5.89279	3.79731e-09	1.04713e-07	Y
chr5_145197457_145205763	34.6552	7.82504	1.32807	5.89206	3.81421e-09	1.04713e-07	Y
chr5_76745585_76760634	164.861	-1.16673	0.198009	-5.89232	3.80816e-09	1.04713e-07	Y
chr1_214068006_214139627	17.1745	8.40774	1.42736	5.89039	3.85275e-09	1.05363e-07	Y
chr3_154801947_154836600	24.1175	3.45464	0.587113	5.88412	4.00188e-09	1.0902e-07	Y
chr2_191774989_191778090	20.7047	7.81087	1.32774	5.88285	4.03268e-09	1.09439e-07	Y
chr9_114148657_114154104	358.802	0.957699	0.162891	5.87939	4.1179e-09	1.11325e-07	N
chr14_61482622_61512885	22.8262	-8.11851	1.38174	-5.87558	4.21354e-09	1.13477e-07	Y
chr13_98865474_98865667	87.1838	2.44545	0.416354	5.87349	4.26712e-09	1.14485e-07	Y
chr10_96005703_96006378	21.0361	-8.00092	1.36313	-5.86951	4.37072e-09	1.16822e-07	Y
chr10_104018686_104103939	20.3317	-7.95195	1.3553	-5.86728	4.4299e-09	1.17192e-07	Y
chr11_46515158_46529920	313.719	-2.75946	0.470386	-5.86637	4.45434e-09	1.17192e-07	Y
chr13_114174931_114193822	56.604	2.62918	0.448196	5.86615	4.46038e-09	1.17192e-07	Y
chr3_169854207_169867032	64.6928	-2.82325	0.481299	-5.86589	4.46731e-09	1.17192e-07	Y
chr9_14639894_14680160	29.4571	8.04756	1.37166	5.86704	4.43641e-09	1.17192e-07	Y
chr8_18622959_18662408	164.784	-1.24791	0.212915	-5.86105	4.5996e-09	1.20218e-07	Y
chr8_100286426_100287482	86.2499	-2.08881	0.356492	-5.85935	4.64674e-09	1.21003e-07	Y
chr7_618893_635941	29.0552	4.1472	0.709709	5.84352	5.11082e-09	1.326e-07	Y
chr3_127980971_127983624	138.09	-1.11492	0.190905	-5.84015	5.21541e-09	1.3482e-07	Y
chr3_143704385_143708679	36.2394	-7.92708	1.35849	-5.8352	5.37256e-09	1.38378e-07	Y
chr17_11998892_12016677	21.2092	-8.01256	1.37433	-5.83017	5.53703e-09	1.42097e-07	Y
chr14_91444650_91467503	51.1944	-4.33429	0.743876	-5.82663	5.65579e-09	1.44461e-07	Y
chrX_21869627_21871621	19.9999	-7.92812	1.36077	-5.82621	5.66992e-09	1.44461e-07	Y
chr2_219299249_219300157	20.2934	8.64825	1.48664	5.81731	5.98012e-09	1.51818e-07	Y
chr10_486811_532470	19.8952	-7.92058	1.36224	-5.8144	6.08535e-09	1.53938e-07	Y
chr11_18010144_18029623	45.307	3.48338	0.603249	5.77437	7.724e-09	1.94694e-07	Y
chr9_134312007_134314448	113.769	-1.2954	0.22541	-5.74686	9.09181e-09	2.28359e-07	Y
chr12_104682709_104683320	19.1479	-7.86539	1.36942	-5.74358	9.26938e-09	2.31996e-07	Y
chr9_14146688_14179779	43.0504	-7.12469	1.24104	-5.74089	9.41806e-09	2.34888e-07	Y
chr15_43120126_43132631	201.059	-1.20618	0.210576	-5.72801	1.01616e-08	2.52543e-07	Y
chr12_50821545_50824353	112.658	1.12645	0.19675	5.72525	1.03281e-08	2.55784e-07	Y
chr7_3658712_3681737	93.5065	-6.88533	1.20464	-5.71567	1.09274e-08	2.69682e-07	Y
chr7_30363258_30363918	24.5945	-7.31054	1.28177	-5.70348	1.17384e-08	2.88692e-07	Y
chr2_47604153_47607108	20.7516	7.83802	1.37487	5.70091	1.19171e-08	2.92071e-07	Y
chr3_195101738_195112876	69.7694	-1.895	0.332561	-5.6982	1.21077e-08	2.9572e-07	Y
chr12_46633462_46648719	104.415	-1.60912	0.282854	-5.68886	1.27887e-08	3.1128e-07	Y
chr6_159001972_159010814	380.55	1.11247	0.195576	5.68815	1.28419e-08	3.11505e-07	Y
chr19_3660964_3661999	65.1279	1.77323	0.311886	5.68552	1.30414e-08	3.15264e-07	Y
chr7_27668990_27672064	326.12	-1.26373	0.222758	-5.67312	1.40223e-08	3.37822e-07	Y
chr1_61743192_61824946	22.6975	-8.07984	1.42451	-5.67201	1.41136e-08	3.38869e-07	Y
chr19_17212470_17213367	104.576	2.15781	0.381496	5.65618	1.5478e-08	3.70373e-07	Y
chr3_149563798_149589941	177.841	-1.02202	0.180738	-5.6547	1.56118e-08	3.72317e-07	Y
chr3_171965323_171969331	37.0814	-3.34009	0.591517	-5.64664	1.6361e-08	3.88876e-07	Y
chr2_48555700_48573890	33.3917	3.37648	0.598728	5.63943	1.70611e-08	4.04161e-07	Y
chr13_51501543_51523641	68.2418	2.11362	0.376956	5.60707	2.0578e-08	4.84233e-07	Y
chr3_80680382_80683122	34.1758	7.25372	1.29357	5.60753	2.05232e-08	4.84233e-07	Y
chr9_88211277_88248289	38.524	-4.30551	0.767955	-5.60645	2.06515e-08	4.84352e-07	Y
chr4_85818064_85853516	32.1344	-5.58065	0.995726	-5.6046	2.08733e-08	4.87939e-07	Y
chr1_21083659_21100103	70.2373	-1.77841	0.318172	-5.58947	2.27761e-08	5.30669e-07	Y
chr10_74501480_74502031	18.499	-7.81542	1.39958	-5.58412	2.34885e-08	5.45471e-07	Y
chr3_186509514_186510736	15.3759	7.61711	1.3658	5.57704	2.44649e-08	5.66292e-07	Y
chr4_1219148_1235307	438.662	0.655266	0.117535	5.57506	2.47451e-08	5.7091e-07	N
chr9_96238538_96261168	55.0897	-1.97117	0.353655	-5.57369	2.49397e-08	5.73531e-07	Y
chr7_33185854_33217203	254.206	-1.31109	0.235601	-5.56488	2.62333e-08	6.01329e-07	Y
chr19_50902108_50902741	88.1709	1.44069	0.259771	5.546	2.92279e-08	6.6781e-07	Y
chr11_117023157_117034608	120.838	1.49692	0.270274	5.53854	3.05005e-08	6.93228e-07	Y
chr5_70888753_70900295	123.014	1.30068	0.234851	5.53833	3.05361e-08	6.93228e-07	Y
chr1_247319708_247323115	269.544	1.27565	0.230415	5.53631	3.08905e-08	6.99033e-07	Y
chr19_37690302_37698156	17.605	-7.74414	1.39923	-5.53458	3.11973e-08	7.03727e-07	Y
chr2_61749746_61753656	286.96	-0.963816	0.174269	-5.53061	3.19119e-08	7.17562e-07	Y
chr3_5212188_5216099	71.6529	-1.81153	0.327921	-5.52429	3.3083e-08	7.4154e-07	Y
chr7_128655033_128658211	682.903	-0.683584	0.123757	-5.5236	3.32126e-08	7.42098e-07	N
chr20_57014001_57016139	35.7126	-3.29143	0.596458	-5.5183	3.42288e-08	7.60873e-07	Y
chr8_48308936_48320523	21.4586	-7.59963	1.37722	-5.5181	3.42677e-08	7.60873e-07	Y
chr6_157357969_157406039	104.624	1.67452	0.30378	5.51228	3.54209e-08	7.84019e-07	Y
chrX_47705504_47755339	382.87	0.919175	0.167616	5.48382	4.16244e-08	9.18461e-07	N
chr19_10602253_10602938	25.0785	7.25959	1.3248	5.47974	4.25949e-08	9.36956e-07	Y
chr15_56686363_56687032	80.3922	-1.42729	0.260582	-5.4773	4.31861e-08	9.47019e-07	Y
chr10_89685270_89712016	17.1601	-7.70717	1.4074	-5.47619	4.34582e-08	9.50045e-07	Y
chr12_46622936_46648719	70.1652	-1.86107	0.340107	-5.47201	4.44952e-08	9.69722e-07	Y
chr20_47682729_47683047	35.0365	3.62954	0.663967	5.46645	4.59147e-08	9.97588e-07	Y
chr12_8866407_8866637	30.0478	-6.23574	1.14613	-5.44068	5.30774e-08	1.14968e-06	Y
chr12_39223181_39242464	17.0851	-7.70108	1.41719	-5.43404	5.50925e-08	1.1897e-06	Y
chr9_86297866_86301070	104.86	-1.43455	0.264041	-5.43307	5.53929e-08	1.19255e-06	Y
chr4_103635595_103647840	40.0613	-2.63576	0.485722	-5.42647	5.74788e-08	1.2337e-06	Y
chr12_29812813_29814312	17.3032	-7.71953	1.42292	-5.42513	5.79109e-08	1.23922e-06	Y
chr7_47474880_47481653	62.4919	2.53385	0.467822	5.41626	6.08576e-08	1.29836e-06	Y
chr10_89527430_89536184	87.2188	1.38718	0.257048	5.39657	6.79275e-08	1.44142e-06	Y
chr7_152007051_152012423	190.389	-1.7416	0.322731	-5.39646	6.79702e-08	1.44142e-06	Y
chr4_151023630_151023964	87.7412	-9.99991	1.85553	-5.38925	7.07526e-08	1.49594e-06	Y
chr5_127854966_127866386	16.6857	-7.66677	1.42415	-5.38341	7.30888e-08	1.54074e-06	Y
chr3_124560230_124592378	25.4492	-6.8133	1.26637	-5.38017	7.44171e-08	1.56408e-06	Y
chr22_48081949_48082955	16.9064	-7.68564	1.43092	-5.37113	7.82431e-08	1.63963e-06	Y
chr10_126631026_126631876	709.936	-0.720428	0.134525	-5.35535	8.53889e-08	1.7841e-06	N
chr15_89656956_89698765	38.9549	3.24082	0.606827	5.34061	9.26368e-08	1.92984e-06	Y
chr5_122881111_122893258	78.6458	-1.51691	0.284241	-5.33672	9.46452e-08	1.9659e-06	Y
chr19_34921481_34925873	154.689	0.99952	0.187318	5.33594	9.50485e-08	1.9685e-06	N
chr12_29904599_29911710	17.213	-7.71196	1.44563	-5.33467	9.57206e-08	1.97665e-06	Y
chr10_116247717_116251637	28.1575	-6.67921	1.25362	-5.32793	9.93378e-08	2.04538e-06	Y
chr14_66028055_66028484	390.672	0.816075	0.153731	5.30845	1.10563e-07	2.26991e-06	N
chr14_68151732_68157138	18.6005	-7.05578	1.33017	-5.30443	1.13023e-07	2.31371e-06	Y
chr2_182786675_182793005	26.7145	5.88811	1.1114	5.29794	1.17118e-07	2.39063e-06	Y
chr2_47606092_47607108	21.5095	7.68061	1.45224	5.28882	1.23108e-07	2.50566e-06	Y
chr3_195101738_195133645	48.8225	-2.90661	0.549663	-5.28798	1.23675e-07	2.50999e-06	Y
chr20_35236118_35238133	38.2069	-2.10455	0.399115	-5.27303	1.34187e-07	2.71556e-06	Y
chr4_115380370_115412085	16.055	-7.61116	1.44568	-5.26476	1.4037e-07	2.83259e-06	Y
chr5_78734833_78752841	87.4615	1.5213	0.289299	5.25857	1.45181e-07	2.92136e-06	Y
chr3_197009550_197009716	31.0384	4.45159	0.847103	5.25508	1.47963e-07	2.96891e-06	Y
chrX_112291554_112293180	15.7385	-7.58256	1.44384	-5.25167	1.50723e-07	3.01574e-06	Y
chr10_70227880_70229920	427.009	0.891636	0.170053	5.2433	1.5773e-07	3.14705e-06	N
chr6_155108995_155116273	54.533	1.90975	0.364302	5.24222	1.58656e-07	3.14779e-06	Y
chr6_87925621_87928449	303.137	-0.957731	0.182695	-5.24224	1.58638e-07	3.14779e-06	Y
chr5_133534777_133541822	80.7489	-1.72925	0.330669	-5.22955	1.69926e-07	3.36198e-06	Y
chr16_68300496_68309152	121.708	1.56996	0.300411	5.22606	1.73162e-07	3.41646e-06	Y
chr7_8043538_8099878	15.7123	-7.57995	1.45133	-5.22277	1.76262e-07	3.46796e-06	Y
chr15_50940884_50955243	88.0894	-1.39985	0.268146	-5.22048	1.7846e-07	3.50147e-06	Y
chr2_47600602_47601187	14.8614	7.21931	1.38568	5.20993	1.8891e-07	3.69628e-06	Y
chr16_66655965_66657405	13.1957	8.02807	1.54206	5.20607	1.92877e-07	3.7635e-06	Y
chr12_28408514_28412375	16.5865	-7.6582	1.47317	-5.19847	2.00939e-07	3.91002e-06	Y
chr3_195415404_195416309	15.3246	-7.54397	1.45414	-5.18791	2.12663e-07	4.12683e-06	Y
chr11_1307232_1311639	27.2743	4.64009	0.895347	5.18245	2.18985e-07	4.22634e-06	Y
chr17_8354098_8363478	15.1972	-7.53204	1.4533	-5.1827	2.18698e-07	4.22634e-06	Y
chr11_120524394_120531109	13.5888	8.06996	1.55787	5.18014	2.21724e-07	4.26758e-06	Y
chr16_67662273_67663436	59.4365	2.1962	0.424647	5.17182	2.31827e-07	4.44995e-06	Y
chr10_71243447_71258152	19.1822	3.60045	0.696961	5.16593	2.39248e-07	4.57999e-06	Y
chr3_11399892_11421526	82.9817	-1.68995	0.327238	-5.16427	2.41384e-07	4.60842e-06	Y
chr9_114341076_114348445	15.7386	-7.58282	1.46921	-5.16115	2.45431e-07	4.67308e-06	Y
chr4_39077585_39088347	17.1251	-6.88306	1.33606	-5.15177	2.58036e-07	4.89991e-06	Y
chr17_50850586_50882797	15.0412	-7.51707	1.46249	-5.13993	2.74843e-07	5.20511e-06	Y
chr13_76195899_76301234	35.6297	3.04172	0.592171	5.13656	2.79817e-07	5.28518e-06	Y
chr17_29483001_29497015	127.725	-1.52239	0.296566	-5.1334	2.84556e-07	5.36039e-06	Y
chr2_135007621_135028121	19.4481	7.10291	1.38478	5.12926	2.90886e-07	5.46511e-06	Y
chr7_128845044_128846428	16.0445	7.05271	1.38036	5.10933	3.23301e-07	6.05804e-06	Y
chr8_145245687_145255444	94.8281	1.81498	0.355363	5.1074	3.26622e-07	6.10412e-06	Y
chr17_44143903_44172067	238.709	-0.882419	0.172857	-5.10492	3.30937e-07	6.16849e-06	N
chr21_46548317_46554747	14.6602	-6.96291	1.36454	-5.10276	3.34728e-07	6.22278e-06	Y
chr7_959605_975141	20.8345	6.41144	1.25771	5.09771	3.43784e-07	6.3744e-06	Y
chr2_43655239_43755127	12.4686	7.40629	1.45316	5.09667	3.45688e-07	6.39298e-06	Y
chr14_99924616_99932150	976.478	-0.452042	0.0888961	-5.08505	3.67524e-07	6.7791e-06	N
chr10_116879949_116889297	40.849	-6.38325	1.25681	-5.07893	3.79559e-07	6.98289e-06	Y
chr19_17387304_17387718	89.4657	-1.43767	0.283306	-5.07463	3.88242e-07	7.12414e-06	Y
chr12_70193989_70195501	183.945	-1.03698	0.204367	-5.07408	3.89378e-07	7.12653e-06	Y
chr3_196831774_196846401	1184.34	-0.552859	0.109159	-5.06471	4.09033e-07	7.46696e-06	N
chr12_50821545_50822873	82.1917	1.21937	0.241349	5.05232	4.3648e-07	7.94752e-06	Y
chr1_214564331_214571344	27.859	-6.3454	1.2575	-5.04605	4.5104e-07	8.19158e-06	Y
chr11_1307232_1317024	36.7378	4.16812	0.82655	5.0428	4.58777e-07	8.31079e-06	Y
chr18_18945988_18983955	14.6055	-7.47459	1.48273	-5.04109	4.62887e-07	8.36385e-06	Y
chr14_71880665_71933964	48.347	-2.28447	0.45334	-5.0392	4.67481e-07	8.42537e-06	Y
chr17_11958206_11999011	14.8315	-7.49662	1.48913	-5.03423	4.7977e-07	8.6249e-06	Y
chr3_195047614_195066046	21.8396	-4.59323	0.915176	-5.01896	5.19516e-07	9.31578e-06	Y
chr8_124349865_124351686	82.4542	1.35041	0.269206	5.01629	5.26791e-07	9.42237e-06	Y
chr19_6702138_6702590	14.5985	-6.86239	1.36849	-5.01458	5.31483e-07	9.48235e-06	Y
chr3_61975299_61989171	14.7397	-7.48767	1.4934	-5.01385	5.33527e-07	9.49491e-06	Y
chr16_88066715_88071617	14.5148	-7.46561	1.48949	-5.0122	5.38119e-07	9.55263e-06	Y
chr7_635783_751164	29.9895	3.58751	0.716511	5.00692	5.53086e-07	9.79378e-06	Y
chr11_70200407_70202360	51.0982	1.82065	0.364152	4.9997	5.74204e-07	1.01424e-05	Y
chr6_158870028_158873300	30.0329	3.1721	0.635332	4.99283	5.95019e-07	1.04839e-05	Y
chr8_95673126_95674783	18.5721	8.12498	1.63387	4.97285	6.59754e-07	1.15956e-05	Y
chr9_125230840_125231464	16.3434	8.04353	1.61781	4.97185	6.63169e-07	1.16268e-05	Y
chr11_108098322_108106561	29.4823	4.79465	0.965004	4.96853	6.74637e-07	1.17987e-05	Y
chr4_148778704_148803083	37.2039	-2.85077	0.574646	-4.96091	7.01637e-07	1.22406e-05	Y
chr2_184022172_184025923	14.0403	-6.96261	1.40469	-4.95671	7.16987e-07	1.24777e-05	Y
chr5_108281831_108295048	35.8923	-4.06368	0.823965	-4.93185	8.14526e-07	1.41404e-05	N
chr11_120343759_120348235	42.7521	2.33541	0.47367	4.93046	8.2035e-07	1.42067e-05	Y
chr16_29323671_29339945	22.1541	5.47246	1.1119	4.92172	8.57858e-07	1.482e-05	Y
chr8_129021836_129022690	72.955	-1.40787	0.286091	-4.92105	8.60825e-07	1.48351e-05	Y
chr18_18975346_18983955	14.4867	-7.46264	1.51686	-4.91981	8.66281e-07	1.48929e-05	Y
chr13_41515057_41515506	13.4397	7.11279	1.44688	4.91595	8.83533e-07	1.51527e-05	Y
chr5_142434004_142437312	157.43	1.51709	0.308686	4.91466	8.8935e-07	1.52156e-05	Y
chr10_12442720_12445368	13.9673	-7.4104	1.51208	-4.9008	9.54457e-07	1.62902e-05	Y
chr13_24796957_24798720	29.0118	4.03199	0.823094	4.89857	9.65359e-07	1.64366e-05	N
chr10_116719485_116734144	22.179	-4.24269	0.866236	-4.89785	9.68926e-07	1.64578e-05	Y
chr7_103777228_103805730	18.1107	-6.51037	1.33185	-4.8882	1.01764e-06	1.72438e-05	Y
chr1_32381496_32385259	110.344	-1.58784	0.325085	-4.88439	1.0375e-06	1.75385e-05	Y
chr13_28748409_28752072	55.3257	-1.91704	0.393038	-4.8775	1.07441e-06	1.81192e-05	Y
chr12_112371690_112381173	34.4752	-2.65538	0.544538	-4.87639	1.08045e-06	1.81777e-05	Y
chr19_49136701_49136912	30.2549	-6.11158	1.25363	-4.87509	1.08759e-06	1.82544e-05	Y
chr5_111570331_111602027	15.471	-6.5443	1.34295	-4.87306	1.09881e-06	1.83992e-05	Y
chr4_39900009_39904080	35.7183	2.47966	0.509706	4.86488	1.14527e-06	1.9132e-05	Y
chr2_55209651_55214834	477.138	-0.931689	0.191746	-4.85897	1.17995e-06	1.96649e-05	N
chr4_7857193_7873807	13.5613	-7.36769	1.51767	-4.85461	1.20626e-06	2.00561e-05	Y
chr12_56871444_56872046	11.5707	7.24213	1.49465	4.84535	1.26386e-06	2.09647e-05	Y
chr1_214133453_214139627	11.5774	7.83922	1.61905	4.84185	1.28633e-06	2.1274e-05	Y
chr7_157361594_157370832	19.6758	8.16285	1.68601	4.84152	1.28852e-06	2.1274e-05	Y
chr12_96076483_96077487	13.5743	-7.36903	1.52261	-4.83973	1.30017e-06	2.13671e-05	Y
chr2_28974904_29022165	23.0599	-4.89036	1.01046	-4.83973	1.30019e-06	2.13671e-05	Y
chr3_33109722_33110462	35.9483	-3.87409	0.800717	-4.83828	1.30966e-06	2.14729e-05	Y
chr7_74119496_74133260	180.746	-1.16615	0.241372	-4.83133	1.35625e-06	2.21855e-05	Y
chr19_46020921_46021352	36.5412	2.63628	0.545882	4.8294	1.36948e-06	2.23503e-05	Y
chr21_35475134_35475818	26.0722	7.64264	1.58491	4.82212	1.42038e-06	2.31277e-05	Y
chr7_143884054_144074283	11.3087	7.26095	1.50621	4.82067	1.4308e-06	2.32439e-05	Y
chr2_58449077_58459247	511.176	0.549199	0.113956	4.8194	1.43989e-06	2.3338e-05	N
chr9_99537070_99538527	45.6366	-2.31325	0.481427	-4.80499	1.54758e-06	2.50263e-05	Y
chr9_114332371_114348445	21.4169	-7.67293	1.59742	-4.80334	1.56041e-06	2.51763e-05	Y
chr17_15449099_15458678	14.5033	-6.79484	1.42444	-4.77019	1.84051e-06	2.96281e-05	Y
chr1_200729967_200730226	55.2742	-2.17151	0.455315	-4.76925	1.84915e-06	2.96996e-05	Y
chr4_128842679_128861152	20.7803	-4.36365	0.917188	-4.75764	1.95871e-06	3.13881e-05	Y
chr17_28011581_28030080	53.4606	-1.59396	0.335334	-4.75335	2.00076e-06	3.19896e-05	Y
chr2_98430434_98435184	13.2888	-6.53023	1.3764	-4.74444	2.09084e-06	3.33545e-05	Y
chr2_44436349_44445676	49.1995	-1.89218	0.398893	-4.74358	2.09971e-06	3.34208e-05	Y
chr8_131370263_131414216	31.775	-5.937	1.25235	-4.74067	2.13008e-06	3.38282e-05	Y
chr17_26490569_26499644	45.1416	-2.96468	0.625841	-4.73712	2.16773e-06	3.4349e-05	Y
chr1_40654727_40668286	43.615	-2.3715	0.50093	-4.7342	2.19919e-06	3.46923e-05	Y
chr9_100756913_100760960	37.3484	-2.12887	0.449674	-4.73426	2.19857e-06	3.46923e-05	Y
chr16_4382216_4383520	23.1188	-6.10586	1.29093	-4.7298	2.24739e-06	3.5374e-05	Y
chr17_70416841_70417207	13.0841	7.13705	1.50991	4.72681	2.28076e-06	3.58195e-05	Y
chr1_246490503_246498776	69.5166	-2.014	0.426273	-4.72468	2.30474e-06	3.61162e-05	Y
chr11_17899755_18031686	17.3478	4.2473	0.89932	4.72279	2.32626e-06	3.63728e-05	Y
chr9_113734353_113735838	18.002	8.08002	1.71452	4.71271	2.44443e-06	3.81364e-05	Y
chr3_98600384_98600611	62.401	5.50817	1.17109	4.70346	2.55785e-06	3.98181e-05	Y
chr12_27149675_27152609	56.5359	1.76134	0.374558	4.70246	2.57045e-06	3.99266e-05	Y
chrX_17491184_17495443	13.2873	-7.33798	1.56633	-4.68482	2.80209e-06	4.34293e-05	Y
chr3_63898264_63898901	114.703	1.37423	0.29361	4.68046	2.86238e-06	4.42669e-05	Y
chr5_77805607_77806221	193.755	1.05874	0.227037	4.66329	3.11193e-06	4.80213e-05	Y
chr1_231506308_231509845	28.0845	-4.12469	0.884652	-4.6625	3.12397e-06	4.81023e-05	Y
chr21_45497574_45500008	40.337	2.43006	0.521815	4.65694	3.20946e-06	4.93116e-05	Y
chr8_131164982_131181313	42.0141	-5.77054	1.24092	-4.6502	3.3161e-06	5.073e-05	N
chr16_7926082_7944397	12.3733	-7.23541	1.55583	-4.65053	3.31083e-06	5.073e-05	Y
chr1_175996708_176015460	20.1416	-5.51515	1.18721	-4.64547	3.39305e-06	5.17953e-05	Y
chr11_18312989_18313566	72.051	-1.72728	0.372004	-4.64316	3.43123e-06	5.22653e-05	Y
chr11_57258697_57259335	34.626	9.22557	1.98803	4.64056	3.4747e-06	5.28139e-05	Y
chr7_16722405_16729531	21.9105	3.41677	0.736656	4.63822	3.51418e-06	5.32996e-05	Y
chr1_214068006_214074752	10.5667	7.70727	1.6643	4.63093	3.64032e-06	5.50949e-05	Y
chr4_110580167_110585550	23.9679	-4.94812	1.06999	-4.62445	3.75586e-06	5.67222e-05	Y
chr21_46538479_46548488	24.3643	-3.80874	0.823728	-4.62378	3.76815e-06	5.67869e-05	Y
chr10_70411603_70433244	11.8118	7.69498	1.67343	4.59834	4.25872e-06	6.37728e-05	Y
chr2_44139571_44153100	35.9081	2.1844	0.47496	4.59912	4.2428e-06	6.37728e-05	Y
chrX_74965453_74965904	13.1434	7.96946	1.73297	4.59872	4.25094e-06	6.37728e-05	Y
chr6_43106587_43107263	16.6925	7.9183	1.72352	4.59426	4.34292e-06	6.48965e-05	Y
chr9_137591755_137593179	12.2846	-7.22503	1.57282	-4.59368	4.35507e-06	6.4941e-05	Y
chr12_27183667_27185614	10.9222	6.84473	1.49088	4.59105	4.4102e-06	6.56249e-05	N
chr11_110007388_110008139	66.5688	-1.62041	0.353835	-4.57956	4.65945e-06	6.91885e-05	Y
chr13_52992127_53001354	32.9169	2.29692	0.502016	4.57539	4.75334e-06	7.0435e-05	Y
chr15_101775287_101775782	44.8709	-2.01707	0.441728	-4.56631	4.96383e-06	7.34004e-05	Y
chr6_158733083_158735300	30.2512	2.33612	0.511715	4.56528	4.98833e-06	7.3609e-05	Y
chr11_32611093_32617593	47.4007	2.19279	0.480428	4.56424	5.01303e-06	7.38197e-05	Y
chr5_34175927_34182972	12.1772	-7.2124	1.58061	-4.56306	5.04145e-06	7.40842e-05	Y
chr1_91382197_91383711	184.783	-1.31366	0.288202	-4.5581	5.16181e-06	7.56959e-05	Y
chr4_1902353_1906105	80.0585	1.79449	0.393858	4.55619	5.20889e-06	7.62284e-05	Y
chr12_22796697_22826594	115.566	1.10379	0.242448	4.55268	5.29665e-06	7.73529e-05	Y
chr7_716866_720363	48.5882	2.01042	0.442005	4.54841	5.40516e-06	7.87751e-05	Y
chr7_106921745_106924177	13.0158	-6.658	1.46517	-4.54417	5.51534e-06	8.00515e-05	Y
chr7_30363258_30405911	14.4925	-6.24643	1.3745	-4.5445	5.50646e-06	8.00515e-05	Y
chr1_23107914_23111569	13.5055	7.75548	1.70785	4.54107	5.59698e-06	8.10704e-05	Y
chr18_9775275_9815219	12.2453	-7.22053	1.59257	-4.53388	5.79102e-06	8.37098e-05	Y
chr3_179481790_179483636	23.9015	-3.85109	0.851265	-4.52395	6.0695e-06	8.75565e-05	Y
chr16_74491772_74493687	31.3412	2.39872	0.530873	4.51844	6.22969e-06	8.96848e-05	Y
chr17_59853762_59857762	135.272	-0.856998	0.189885	-4.51326	6.38396e-06	9.17193e-05	N
chr21_26825503_26838789	10.1365	7.64721	1.69713	4.50598	6.60679e-06	9.47286e-05	Y
chr4_1102131_1105609	16.3355	-7.57533	1.68182	-4.50425	6.66062e-06	9.53075e-05	Y
chr17_11958206_12016677	12.8563	-7.29035	1.61925	-4.5023	6.72205e-06	9.58735e-05	Y
chr3_149563798_149619949	46.6307	-1.98648	0.441231	-4.50214	6.72726e-06	9.58735e-05	Y
chr3_33725851_33731424	58.5791	-3.01682	0.672187	-4.48807	7.18703e-06	0.00010222	N
chr1_176132005_176153828	58.7511	-1.33798	0.298206	-4.48675	7.23191e-06	0.000102653	Y
chr11_120345269_120348235	82.7217	1.14891	0.256716	4.4754	7.62676e-06	0.000107893	N
chr14_50666409_50671127	15.5844	-7.27814	1.6263	-4.47527	7.63154e-06	0.000107893	Y
chr21_34717552_34721849	11.4786	-6.39263	1.43043	-4.46904	7.85706e-06	0.00011086	Y
chr18_77208782_77211816	12.0727	-6.29883	1.41239	-4.45969	8.20794e-06	0.00011558	Y
chr2_36596251_36623930	17.3561	-7.3849	1.65648	-4.45819	8.26537e-06	0.000116158	Y
chr19_40964062_40964452	12.3706	-6.3443	1.42422	-4.45457	8.40608e-06	0.000117902	Y
chr2_68717322_68742868	15.3099	6.35712	1.42741	4.45362	8.44335e-06	0.00011819	Y
chr1_214068006_214089442	10.0021	7.62788	1.71402	4.45029	8.57541e-06	0.000119802	Y
chr5_170667932_170669824	35.787	-3.0062	0.675661	-4.44928	8.61582e-06	0.00012013	Y
chr5_142416761_142437312	82.2746	1.44967	0.326232	4.44367	8.84383e-06	0.000123066	Y
chr21_36206707_36231875	38.6332	1.93164	0.435117	4.43936	9.02276e-06	0.00012531	Y
chr17_79254409_79258695	44.4558	2.6752	0.603296	4.43431	9.23665e-06	0.00012803	Y
chr6_101163338_101173579	35.0173	-2.1361	0.482693	-4.42537	9.62762e-06	0.000133188	Y
chrX_154645236_154649223	18.6328	-7.73356	1.74849	-4.423	9.73398e-06	0.000134397	Y
chr11_66589114_66595835	12.5125	-6.19894	1.40257	-4.4197	9.88399e-06	0.000136065	Y
chr5_170610203_170632616	99.8553	-1.41295	0.319707	-4.4195	9.89316e-06	0.000136065	Y
chr14_103865288_103894777	29.1233	-3.141	0.71175	-4.41306	1.01919e-05	0.000139902	Y
chrX_67266836_67273652	65.1097	-1.37258	0.311393	-4.40789	1.04382e-05	0.000143006	Y
chr22_46085592_46125470	48.3823	-2.7887	0.634776	-4.3932	1.11696e-05	0.00015273	Y
chr11_120310838_120316173	24.7345	2.79552	0.636587	4.39141	1.12618e-05	0.000153694	Y
chr5_158621724_158630664	35.1313	-3.82096	0.87021	-4.39085	1.12906e-05	0.000153791	Y
chr5_79498705_79501179	13.3276	6.95818	1.58848	4.38039	1.18467e-05	0.000161056	Y
chr11_61205097_61205585	63.9425	1.51786	0.346939	4.37501	1.21425e-05	0.000164762	Y
chr3_43591212_43607219	29.9158	-3.6423	0.832872	-4.37319	1.22447e-05	0.00016583	Y
chr9_111812563_111812972	34.2586	2.36816	0.541605	4.37249	1.22839e-05	0.000166044	Y
chr2_61712903_61717911	114.948	0.978731	0.223878	4.37172	1.23271e-05	0.00016631	N
chr8_99718695_99719539	624.41	-0.926478	0.212094	-4.36825	1.25246e-05	0.000168521	N
chr12_46339032_46345510	11.2904	-6.6947	1.53267	-4.36801	1.25385e-05	0.000168521	Y
chr1_247302018_247323115	146.9	-1.12984	0.258797	-4.36575	1.26689e-05	0.000169951	Y
chr17_12011107_12016677	11.54	-7.13513	1.63717	-4.3582	1.31135e-05	0.000175582	Y
chr1_65016277_65068595	12.7892	7.66154	1.75906	4.35548	1.32773e-05	0.00017744	Y
chr13_95813443_95818621	25.9204	2.35279	0.540352	4.35418	1.33567e-05	0.000178165	Y
chr7_99616854_99621930	10.0008	6.65459	1.53259	4.34205	1.41157e-05	0.000187936	Y
chr11_13435077_13443385	93.8883	1.5875	0.365777	4.34008	1.42428e-05	0.000189272	Y
chr8_71071740_71075089	58.865	-1.56735	0.362016	-4.3295	1.49449e-05	0.00019823	Y
chr4_17963526_17974508	197.665	-1.03357	0.239317	-4.31881	1.5687e-05	0.000207685	Y
chr13_42439872_42442613	265.48	0.918772	0.21279	4.31773	1.57641e-05	0.000208268	N
chr5_102231555_102237117	9.5137	7.55589	1.75011	4.31737	1.57899e-05	0.000208268	Y
chr11_68571468_68575106	53.1164	2.24402	0.520351	4.31251	1.61413e-05	0.000212307	Y
chr2_170728746_170735084	48.3691	-1.9052	0.441847	-4.3119	1.6186e-05	0.000212307	Y
chr3_53908238_53910107	46.6151	1.88109	0.436224	4.31222	1.61622e-05	0.000212307	Y
chr12_20790034_20807139	11.7468	-7.16015	1.6629	-4.30582	1.6637e-05	0.000217819	Y
chr7_24663285_24681487	65.9171	1.05979	0.246214	4.30434	1.67485e-05	0.000218873	N
chr18_18945988_18975522	11.1141	-7.0808	1.64581	-4.30232	1.69017e-05	0.00022047	Y
chr10_225934_267296	82.2747	1.5165	0.352717	4.29949	1.71189e-05	0.000222891	Y
chr11_129551030_129552361	9.8622	7.60753	1.77181	4.29365	1.7576e-05	0.000228424	Y
chr22_43286953_43287188	102.433	-1.06233	0.248013	-4.28334	1.84106e-05	0.000238832	Y
chr4_129913322_129925031	153.488	-1.55872	0.364074	-4.28133	1.85779e-05	0.000240562	Y
chr2_68717322_68740812	15.2741	6.59701	1.54441	4.27155	1.94119e-05	0.000250903	Y
chr16_69170599_69177292	9.80041	7.59877	1.77963	4.26986	1.95598e-05	0.000252353	Y
chr10_120488807_120489922	51.6692	-1.65662	0.388265	-4.26674	1.98352e-05	0.000254977	Y
chr15_85607601_85610435	82.0331	-1.38547	0.324698	-4.26695	1.98165e-05	0.000254977	Y
chr1_213341201_213349835	38.6414	-2.13142	0.499829	-4.26431	2.00525e-05	0.000257133	Y
chr1_94037227_94041686	14.9857	-6.05871	1.42088	-4.26405	2.00755e-05	0.000257133	Y
chr18_29691717_29693823	208.737	-0.898479	0.21088	-4.26062	2.03864e-05	0.000260644	N
chr5_108203468_108219219	14.9065	-6.40466	1.50427	-4.25766	2.06574e-05	0.000263633	Y
chr7_2414163_2416710	14.8803	7.55656	1.77871	4.24833	2.1537e-05	0.000274365	Y
chr1_215342542_215345526	10.6385	-7.01745	1.65392	-4.24292	2.20629e-05	0.000280559	Y
chr4_151719233_151738409	114.467	-1.18695	0.280066	-4.23811	2.25412e-05	0.000286128	Y
chr9_33953283_33963789	817.639	0.495376	0.116918	4.23695	2.2658e-05	0.000287096	N
chr5_170648762_170669824	10.7505	-7.0325	1.66087	-4.23422	2.29348e-05	0.000290084	Y
chr11_9983504_10011142	11.4479	-6.94913	1.64198	-4.23217	2.3145e-05	0.000292221	Y
chr2_44190727_44202356	18.5147	3.46507	0.819107	4.2303	2.3338e-05	0.000294133	Y
chr19_37689841_37698156	10.829	-7.04304	1.66509	-4.22982	2.3388e-05	0.000294181	Y
chr5_131013396_131034695	13.1681	-5.88646	1.39177	-4.22946	2.34248e-05	0.000294181	Y
chr4_185637551_185638350	20.5158	3.37936	0.799197	4.22845	2.3531e-05	0.000294991	Y
chr14_71880665_72043304	9.06704	-6.49859	1.53729	-4.2273	2.36514e-05	0.000295977	N
chr3_11641366_11643496	15.1184	5.32178	1.25908	4.22672	2.37119e-05	0.000296211	Y
chr2_241492331_241494472	10.1134	6.7128	1.59209	4.21634	2.483e-05	0.000309632	Y
chr11_68115315_68131411	13.4204	7.9327	1.88504	4.20824	2.57371e-05	0.000320379	Y
chr7_42187825_42212285	29.6983	-5.40832	1.28633	-4.20445	2.6172e-05	0.000325221	Y
chr10_4872867_4884696	44.6622	9.34479	2.22455	4.20075	2.66037e-05	0.000329431	Y
chr13_114806476_114839312	67.8335	1.40453	0.334335	4.20096	2.6578e-05	0.000329431	Y
chr2_240078348_240085619	55.8452	3.00449	0.716026	4.19607	2.71591e-05	0.00033572	Y
chr12_102291641_102295211	10.9543	-7.05954	1.68293	-4.19479	2.73119e-05	0.000337021	Y
chr5_158608968_158630664	10.6615	-7.0205	1.67435	-4.19296	2.75335e-05	0.000339165	Y
chr15_51240217_51250991	33.5294	-2.32088	0.554037	-4.18903	2.80145e-05	0.000344491	Y
chr1_1192372_1203372	27.4522	2.88172	0.688589	4.18497	2.85205e-05	0.000350105	Y
chr14_90397885_90398971	47.9156	-2.00213	0.478463	-4.1845	2.85798e-05	0.000350226	Y
chr2_206023446_206058044	11.0905	-5.9457	1.42149	-4.18271	2.88051e-05	0.000352378	Y
chr1_94360170_94363454	25.5485	-3.54764	0.849382	-4.17673	2.9573e-05	0.000361148	Y
chr16_70346512_70350007	8.91077	7.46148	1.78821	4.17261	3.01137e-05	0.000367117	Y
chr22_46829290_46835308	20.1551	-3.9076	0.937195	-4.16946	3.05316e-05	0.000371573	Y
chr4_140058784_140060651	37.8066	-8.5833	2.06118	-4.16427	3.12355e-05	0.000379487	Y
chr10_104018686_104044827	10.6923	-7.02485	1.68898	-4.15922	3.19338e-05	0.000387307	Y
chrX_1404671_1409402	44.2895	-9.05663	2.17908	-4.15617	3.2363e-05	0.000391842	Y
chr12_29786080_29813818	10.6066	-7.01293	1.68893	-4.15228	3.29175e-05	0.000397875	Y
chr1_214625148_214638300	14.8899	-6.20651	1.49598	-4.1488	3.34225e-05	0.000403151	Y
chrX_107083900_107097934	17.5844	-5.99663	1.4455	-4.14849	3.34679e-05	0.000403151	Y
chr17_11984673_11999011	10.2806	-6.96805	1.67999	-4.14767	3.35878e-05	0.000403909	Y
chr15_99250791_99251336	84.0744	-1.1607	0.280195	-4.14246	3.43598e-05	0.000412492	Y
chr7_80447615_80458061	10.6421	-7.01793	1.69909	-4.1304	3.62132e-05	0.000434007	Y
chr20_45891032_45905539	17.2858	4.39194	1.06399	4.12781	3.66232e-05	0.00043818	Y
chrX_154645236_154651369	11.5066	-7.08259	1.71965	-4.11863	3.81125e-05	0.00045523	Y
chr15_100821434_100871259	42.0822	5.47273	1.3295	4.11638	3.84872e-05	0.000458931	N
chr3_138289160_138290198	24.1354	6.22049	1.51291	4.11161	3.92902e-05	0.000467718	Y
chr8_6582391_6605349	38.3619	-2.91751	0.709906	-4.10972	3.96144e-05	0.000470786	Y
chr2_43725972_43755127	58.0541	1.71404	0.417155	4.10889	3.97572e-05	0.000471692	Y
chr1_214110597_214139627	9.20614	7.50853	1.82944	4.10429	4.05562e-05	0.000479712	Y
chr17_1540003_1540356	12.4248	-5.81018	1.41566	-4.10422	4.05686e-05	0.000479712	Y
chr9_3330259_3395596	19.1513	6.60236	1.61215	4.09537	4.215e-05	0.000497581	N
chrX_71681854_71684581	58.6269	-1.86344	0.455095	-4.09461	4.22885e-05	0.000498385	Y
chr17_44159807_44172067	72.7385	-1.4421	0.352348	-4.09282	4.26167e-05	0.000501419	Y
chr11_44129233_44151688	11.5188	6.35648	1.55345	4.09184	4.2796e-05	0.000502694	Y
chr1_92798948_92846430	273.573	-0.725723	0.177887	-4.07969	4.50959e-05	0.000528831	N
chr11_68527037_68529155	37.7158	2.11595	0.518708	4.07927	4.51776e-05	0.000528914	Y
chr15_67984817_67995746	15.4137	-7.04668	1.72781	-4.07839	4.53481e-05	0.000530034	Y
chr18_12814202_12836890	26.0812	2.43656	0.598195	4.07318	4.63762e-05	0.000541157	Y
chr10_93902786_93940776	43.5059	-2.95014	0.725472	-4.06651	4.77221e-05	0.000555947	N
chr3_57569625_57570191	46.5774	-2.52945	0.622343	-4.0644	4.81564e-05	0.000560085	Y
chr18_9931807_9950565	21.8854	-4.00726	0.986374	-4.06261	4.85263e-05	0.000563462	Y
chr9_125042722_125054119	131.378	-0.865197	0.213026	-4.06147	4.87644e-05	0.000564755	N
chr1_213251038_213290752	68.9533	-1.30144	0.320447	-4.06131	4.87971e-05	0.000564755	Y
chr2_209150450_209153542	49.4967	-1.50107	0.369846	-4.05865	4.9358e-05	0.000570314	Y
chr10_62021617_62039397	9.06812	7.48667	1.85053	4.04568	5.21711e-05	0.000601837	Y
chr11_18010144_18031686	18.1749	4.44458	1.10063	4.03822	5.38574e-05	0.000620279	Y
chr21_33825620_33840156	12.3947	-6.02655	1.49274	-4.03723	5.40856e-05	0.000621897	Y
chr2_88482218_88482592	12.7748	-5.65523	1.40145	-4.03528	5.45381e-05	0.000626084	Y
chr5_39002637_39021238	41.4467	-2.09689	0.519793	-4.03408	5.48162e-05	0.000628258	Y
chr5_10213603_10224173	152.344	-3.26285	0.810216	-4.02714	5.64598e-05	0.00064605	Y
chr10_17645559_17646046	13.8441	-7.05443	1.75246	-4.02544	5.68695e-05	0.000649688	Y
chr12_70149164_70150443	23.4431	4.13526	1.02852	4.02061	5.80486e-05	0.000662091	Y
chr1_155823067_155823597	117.492	0.921725	0.229278	4.02012	5.81693e-05	0.000662384	N
chr12_65702309_65762806	10.3281	-6.97456	1.73508	-4.01974	5.82613e-05	0.000662384	Y
chr4_123900387_124011860	9.56366	-5.93391	1.47805	-4.01469	5.95238e-05	0.000675652	Y
chr5_79974746_80040434	40.7947	-1.8739	0.467983	-4.0042	6.22269e-05	0.000705206	Y
chr20_5939174_5948671	16.9445	4.75462	1.18986	3.99595	6.4435e-05	0.000729063	Y
chr2_72692289_72707879	35.1326	-1.96998	0.49355	-3.99146	6.5669e-05	0.00074184	Y
chr17_80962991_81006661	9.61499	-6.87157	1.72322	-3.98764	6.67343e-05	0.000750284	Y
chr7_550446_557127	13.3222	7.53038	1.8881	3.98834	6.65364e-05	0.000750284	Y
chr8_142170731_142173528	25.956	-3.93073	0.985684	-3.98782	6.66834e-05	0.000750284	Y
chr4_139135739_139144478	10.066	-6.93772	1.74235	-3.98181	6.83929e-05	0.000767713	Y
chr20_34430495_34446303	14.2972	-6.90367	1.73525	-3.97849	6.93542e-05	0.000777272	Y
chr1_172520652_172526934	107.947	-1.3609	0.342417	-3.97439	7.05591e-05	0.000789107	Y
chr1_1986880_1991030	10.687	7.20886	1.81428	3.97339	7.08558e-05	0.000789107	Y
chr15_50330965_50339661	9.80727	-6.9001	1.73651	-3.97355	7.08091e-05	0.000789107	Y
chr7_106921745_106938791	11.146	-5.99335	1.50832	-3.97352	7.08186e-05	0.000789107	Y
chr6_149899958_149901859	12.0614	3.92384	0.988544	3.96931	7.20808e-05	0.000801489	Y
chr4_88116476_88116842	226.16	-0.914129	0.230382	-3.96788	7.2514e-05	0.000805042	N
chr1_46032241_46032692	48.5512	2.0264	0.511039	3.96525	7.33182e-05	0.000812696	Y
chr4_79158664_79173705	11.5911	7.23319	1.82481	3.9638	7.37652e-05	0.000816373	Y
chr2_43805652_43818093	15.7879	5.00705	1.2644	3.96002	7.49434e-05	0.000828119	Y
chr2_32142995_32168452	49.1918	-1.5369	0.388617	-3.95481	7.65954e-05	0.000845055	Y
chr9_140622801_140638542	11.0001	-5.88238	1.48765	-3.95413	7.68148e-05	0.000846157	Y
chr1_33097428_33099711	28.8661	2.17833	0.551111	3.95262	7.73008e-05	0.000850189	Y
chr5_78416164_78419286	9.81791	-6.90194	1.74817	-3.9481	7.87734e-05	0.000865041	Y
chr4_39915231_39927553	56.7304	-2.07875	0.526921	-3.94509	7.97702e-05	0.000874632	Y
chr1_198247091_198266370	9.33203	-5.98926	1.52054	-3.93889	8.18596e-05	0.000896153	Y
chr3_76399974_76403536	9.44621	7.5459	1.91731	3.93567	8.29639e-05	0.000906842	Y
chr4_85800559_85853516	14.1679	-6.86677	1.74732	-3.92988	8.49897e-05	0.000927553	Y
chr8_19442677_19459376	9.93175	-6.91819	1.7608	-3.92901	8.52947e-05	0.00092945	Y
chr3_188208210_188242575	35.9385	-1.93708	0.493835	-3.92253	8.76253e-05	0.00095338	Y
chr8_126194345_126207514	9.41626	-6.8415	1.74609	-3.91818	8.92211e-05	0.000969254	Y
chr9_100109596_100112837	9.34647	-6.83068	1.74391	-3.91687	8.97047e-05	0.000973015	Y
chr14_71867511_71884913	17.8859	-4.50564	1.15072	-3.91548	9.0223e-05	0.00097714	Y
chr10_93870833_93940776	9.49262	-6.8532	1.7512	-3.91342	9.09976e-05	0.000984025	Y
chr6_158317859_158331057	33.0077	2.59391	0.663871	3.90724	9.33553e-05	0.00100605	N
chr2_32523303_32532259	8.59336	-6.11453	1.56489	-3.90732	9.33238e-05	0.00100605	Y
chr7_98988516_98988876	35.866	2.9689	0.759899	3.90697	9.34602e-05	0.00100605	Y
chr11_36248635_36248980	64.6198	-1.25012	0.320105	-3.90533	9.40956e-05	0.00101135	Y
chr3_150834125_150845771	23.4701	5.96185	1.52686	3.90464	9.43648e-05	0.00101271	N
chr14_102486230_102489217	46.7836	-1.63559	0.418984	-3.90372	9.47272e-05	0.00101506	N
chr2_148730308_148733544	134.836	-0.94055	0.241149	-3.90029	9.60774e-05	0.00102797	Y
chr4_154236637_154237151	13.632	-5.50788	1.41259	-3.89914	9.65351e-05	0.00103131	Y
chr5_167915607_167919852	9.38911	-6.83742	1.75453	-3.89702	9.73851e-05	0.00103882	Y
chr20_43248940_43251571	8.04792	7.31437	1.87848	3.89377	9.86984e-05	0.00105125	Y
chr2_191765290_191789319	37.8621	1.58139	0.406665	3.88868	0.000100791	0.00107193	N
chr5_58476421_58511794	302.911	-6.96056	1.79041	-3.88769	0.000101202	0.00107468	Y
chr1_65830318_65831879	394.679	-0.485992	0.125075	-3.8856	0.000102076	0.00108072	N
chr19_5039847_5047680	81.3259	-1.09692	0.282288	-3.88584	0.000101978	0.00108072	Y
chr7_137597737_137600758	21.8798	-3.54178	0.91207	-3.88323	0.000103076	0.00108968	Y
chr7_73520205_73520573	16.8829	4.10492	1.05726	3.88262	0.000103336	0.00109081	Y
chr5_14330887_14336836	36.442	-2.20718	0.569447	-3.876	0.000106188	0.00111924	Y
chr8_37330596_37333530	9.79759	5.8823	1.518	3.87505	0.000106605	0.00112196	Y
chr8_128902835_128903244	1172.62	-0.532686	0.137496	-3.87418	0.000106985	0.00112246	N
chr16_68090267_68105011	8.39148	7.37525	1.90386	3.87385	0.000107131	0.00112246	Y
chr21_42860321_42861520	7.9001	7.2876	1.8814	3.87349	0.000107286	0.00112246	Y
chr6_142094010_142119292	9.1438	7.49833	1.9355	3.87411	0.000107017	0.00112246	Y
chr15_48888480_48905289	9.34734	-6.83081	1.76673	-3.86637	0.000110469	0.00115406	Y
chr3_52446827_52448603	37.335	1.82526	0.472301	3.86461	0.000111267	0.00115897	N
chr17_18634383_18635447	10.0858	-6.94024	1.79581	-3.86468	0.000111233	0.00115897	Y
chr2_169547544_169574488	53.1335	1.22626	0.317856	3.85791	0.000114361	0.00118901	N
chr1_108724563_108738102	11.8834	-6.79553	1.76174	-3.85728	0.000114654	0.00118901	Y
chr16_68308594_68309152	20.139	2.64924	0.686816	3.85728	0.000114654	0.00118901	Y
chr1_167935867_167944253	139.275	-1.07104	0.277818	-3.85521	0.000115631	0.00119739	Y
chr14_31841016_31844174	15.0805	-5.01872	1.30194	-3.85481	0.000115821	0.00119761	Y
chr4_4088385_4089120	7.73078	7.25649	1.88635	3.84684	0.000119652	0.00123541	Y
chr7_105103068_105108910	37.9448	1.67772	0.436189	3.84632	0.000119907	0.00123624	N
chr22_46125305_46136418	258.963	-1.08568	0.282298	-3.84586	0.000120132	0.00123676	Y
chr1_236332006_236347206	11.4959	-6.7656	1.75995	-3.84421	0.000120942	0.00124329	Y
chr11_66583524_66595835	17.3854	-4.54068	1.18163	-3.84272	0.00012168	0.00124907	Y
chr12_133428204_133430159	9.07395	7.11083	1.85065	3.84234	0.000121869	0.0012492	Y
chr11_62638217_62639141	9.29663	-6.82314	1.77801	-3.83751	0.000124287	0.00127031	Y
chr16_7898762_7901929	9.20898	-6.80947	1.77443	-3.83755	0.000124269	0.00127031	Y
chr22_41277774_41278181	82.262	0.982795	0.256341	3.83394	0.000126108	0.00128706	N
chr8_30557598_30560757	8.74909	-5.77292	1.50688	-3.83105	0.000127599	0.00130041	Y
chr18_18963471_18964364	9.06271	-6.78624	1.77179	-3.83016	0.00012806	0.00130323	Y
chr20_56846419_56847931	61.3875	-1.46651	0.383665	-3.82236	0.00013218	0.00134323	N
chr12_19406874_19413955	35.6835	-2.52133	0.66013	-3.81944	0.000133755	0.00135729	Y
chr8_97549528_97551121	9.03878	-6.78251	1.77739	-3.816	0.000135632	0.00137251	Y
chr9_74810416_74817658	9.19622	-6.80751	1.78395	-3.81598	0.000135643	0.00137251	Y
chr15_50330965_50366382	12.9026	-7.19804	1.88663	-3.8153	0.000136018	0.00137434	Y
chr12_129299320_129299615	104.89	1.07879	0.282982	3.81222	0.000137725	0.00138961	N
chr20_13550154_13568017	8.73053	7.01427	1.84103	3.80998	0.000138977	0.00140025	Y
chr2_148653870_148657467	69.5755	-1.37892	0.362233	-3.80671	0.000140827	0.00141687	Y
chr5_24277273_24282795	9.01487	-6.77844	1.78208	-3.80368	0.000142565	0.00143232	Y
chr15_72300167_72320134	51.3274	-1.4533	0.382272	-3.80173	0.00014369	0.00143955	N
chr1_224553581_224559125	14.8708	-4.22367	1.1109	-3.80202	0.000143523	0.00143955	Y
chr11_65661485_65664477	58.6993	1.5977	0.420493	3.79959	0.000144934	0.00144996	N
chr5_32724804_32739136	8.99279	-6.77498	1.78332	-3.79908	0.000145235	0.00145091	Y
chr3_3819409_3830758	53.4276	1.38504	0.364683	3.79794	0.000145906	0.00145375	N
chr7_90355881_90356126	57.6675	-9.43402	2.48401	-3.7979	0.000145929	0.00145375	Y
chr1_200729967_200784772	91.2817	-1.02777	0.27095	-3.7932	0.00014872	0.0014774	Y
chr9_100780571_100788733	20.2148	-3.88958	1.0254	-3.79324	0.000148695	0.0014774	Y
chr3_45130546_45133030	9.92315	7.17544	1.89308	3.79035	0.000150437	0.00149236	Y
chr10_126370176_126370948	22.272	4.66263	1.23091	3.78796	0.000151889	0.00150255	Y
chr16_70548238_70551643	7.79323	7.26769	1.91855	3.78811	0.000151796	0.00150255	Y
chr2_32602656_32620661	16.5058	6.09768	1.61192	3.78288	0.000155026	0.00153145	Y
chr6_108243001_108250718	36.2894	-2.48047	0.65605	-3.78091	0.000156257	0.00154146	Y
chr16_87782279_87795646	77.4193	1.87385	0.495855	3.77903	0.00015744	0.00155097	Y
chr5_141511373_141524241	15.5099	-5.33746	1.41365	-3.77565	0.000159591	0.00156998	N
chr7_155465561_155473602	428.42	0.818853	0.217065	3.77238	0.000161699	0.00158851	N
chr3_196812451_196846401	108.914	1.37986	0.366022	3.76988	0.000163328	0.0015998	N
chr2_43655239_43657441	25.3188	2.44671	0.648974	3.77012	0.000163167	0.0015998	Y
chr22_46096162_46114373	61.3725	-1.47866	0.392262	-3.76958	0.000163526	0.0015998	Y
chr3_185251359_185252920	8.93627	-6.76576	1.79721	-3.76458	0.000166826	0.00162983	Y
chr3_56694759_56707753	27.5419	-3.19671	0.850595	-3.7582	0.000171137	0.00166965	Y
chr1_47753223_47761520	9.11652	-5.57769	1.48606	-3.75334	0.000174494	0.00170005	N
chr1_21097423_21100103	66.9704	-1.43228	0.38167	-3.75266	0.000174969	0.00170234	Y
chr5_111570331_111576507	11.2761	-6.68198	1.78098	-3.75185	0.000175534	0.0017055	Y
chr5_124036707_124036962	174.013	7.27846	1.94031	3.75119	0.000175997	0.00170636	N
chr4_140263980_140265493	23.787	-2.94941	0.78635	-3.75076	0.0001763	0.00170636	Y
chr8_87386259_87393858	16.3365	-5.51754	1.47107	-3.75069	0.000176345	0.00170636	Y
chr14_50941795_50952912	20.3763	-2.78156	0.742745	-3.74497	0.000180414	0.00174335	Y
chr3_183695305_183696439	10.9496	-5.4064	1.44521	-3.74092	0.00018335	0.0017693	Y
chr16_68934337_68961986	9.24917	-6.81531	1.82571	-3.73297	0.000189237	0.00182126	Y
chr17_8473038_8480656	33.2189	-1.54663	0.414318	-3.73295	0.000189248	0.00182126	Y
chr12_70901675_70916410	8.61221	-6.71265	1.79877	-3.7318	0.000190118	0.0018239	Y
chr7_32914319_32914769	18.6915	3.2395	0.868065	3.73187	0.000190064	0.0018239	Y
chr9_97686268_97718297	9.70946	-5.99447	1.60642	-3.73156	0.000190295	0.0018239	Y
chr20_10536879_10541468	102.982	0.88795	0.238086	3.72953	0.000191834	0.00183369	N
chr1_78324623_78332076	24.3825	-5.06932	1.35917	-3.72971	0.000191702	0.00183369	Y
chr1_31478700_31479949	100.91	-1.13939	0.30572	-3.72692	0.000193838	0.00185034	Y
chr5_179976931_179980471	78.1446	-1.13843	0.305568	-3.72562	0.000194832	0.00185733	Y
chr6_147527107_147560406	8.59919	-6.71051	1.8018	-3.72433	0.000195834	0.00186437	Y
chr1_97981282_98015300	8.61754	-6.71352	1.80332	-3.72287	0.000196974	0.00187271	Y
chr2_106774514_106782539	64.1521	1.38941	0.373457	3.72041	0.000198896	0.00188844	Y
chr7_550446_552092	9.60268	7.06181	1.89901	3.71867	0.000200271	0.00189895	Y
chr13_99109422_99118815	12.3168	7.68927	2.07401	3.70744	0.000209362	0.0019825	Y
chr5_170346445_170395381	12.1944	-6.78501	1.8317	-3.70422	0.000212045	0.00200522	Y
chr1_21091870_21100103	39.4934	-1.86057	0.502551	-3.70226	0.000213685	0.00201805	Y
chr7_158566032_158591763	98.88	-0.981403	0.265224	-3.70028	0.000215363	0.00203118	N
chr10_4872867_4889491	7.38419	7.19064	1.94366	3.69953	0.000216	0.00203177	Y
chr3_141811903_141820683	24.4506	-1.92453	0.520188	-3.69969	0.000215862	0.00203177	Y
chr3_72881520_72893574	42.8847	-2.34215	0.633496	-3.69719	0.000218002	0.00204789	Y
chr9_74823141_74834422	8.50758	-6.69506	1.81138	-3.69611	0.000218931	0.00205389	Y
chr17_79813018_79813462	75.5059	1.32068	0.357454	3.69468	0.000220167	0.00206275	Y
chr2_65228582_65237897	9.20475	-5.61942	1.52175	-3.69273	0.000221856	0.00207583	Y
chr11_106810186_106856857	8.55767	-6.70334	1.81775	-3.68772	0.000226273	0.00211437	Y
chr12_12332744_12340053	60.3722	2.10172	0.570038	3.68698	0.000226934	0.00211775	Y
chrX_130883334_130928494	25.9634	2.0538	0.55771	3.68256	0.000230907	0.002152	Y
chr5_59982789_59983665	8.25685	6.88011	1.86913	3.68092	0.000232396	0.00216302	Y
chr4_148867768_148887990	81.5087	-1.1625	0.316235	-3.67608	0.000236848	0.00220157	Y
chr12_49333438_49334971	49.7874	1.52561	0.415656	3.67036	0.000242211	0.00224846	Y
chr10_93902786_93952393	10.6827	-6.94306	1.89245	-3.66883	0.000243665	0.00225605	Y
chr14_103465902_103478525	10.245	-6.54856	1.78479	-3.6691	0.000243406	0.00225605	Y
chr9_33953283_33956144	25.0764	2.15384	0.587619	3.66538	0.000246976	0.00228372	N
chr18_8718422_8720494	75.6972	1.07291	0.293161	3.65979	0.000252421	0.00233102	N
chr7_156516806_156619438	45.0414	-1.57014	0.429271	-3.6577	0.000254492	0.00234657	Y
chr8_141828376_141900868	72.9648	-1.46469	0.400471	-3.65742	0.000254766	0.00234657	Y
chr6_43501644_43516197	6.61843	6.01485	1.64587	3.65451	0.000257669	0.00237022	Y
chr20_30954187_30978970	67.8215	-1.13941	0.311909	-3.65303	0.000259159	0.00238084	N
chr16_74942806_74943815	9.60878	7.43722	2.03911	3.64729	0.000265017	0.0024315	Y
chr20_2944918_2945848	10.6442	-5.37723	1.47614	-3.64277	0.000269717	0.00247141	Y
chr5_74130251_74137504	35.1877	1.63596	0.449601	3.6387	0.000274019	0.00250436	N
chr3_195016437_195022903	8.48421	-5.71913	1.5717	-3.63882	0.00027389	0.00250436	Y
chr4_129919029_129925031	8.64668	-5.60799	1.54304	-3.63438	0.000278649	0.00254339	Y
chr1_46543187_46546422	13.4607	-7.16942	1.97648	-3.62737	0.000286327	0.00260675	Y
chr5_43295854_43297268	14.0921	-7.22216	1.99091	-3.62756	0.000286111	0.00260675	Y
chr22_46085592_46136418	72.788	-1.27631	0.351958	-3.62631	0.000287498	0.00261406	Y
chr11_28700652_28763455	8.32832	-6.66432	1.83857	-3.62473	0.000289267	0.00262677	Y
chr17_58700882_58725443	18.5227	3.13502	0.865046	3.62411	0.000289959	0.00262968	N
chr1_24143165_24147083	11.5375	-6.61436	1.82646	-3.6214	0.00029301	0.00265056	Y
chr14_71880665_71979562	18.8972	-5.02254	1.38687	-3.62149	0.00029291	0.00265056	Y
chr20_61291764_61292527	44.9331	6.66494	1.84155	3.6192	0.000295517	0.00266879	N
chr12_70671912_70704797	88.0932	-1.25251	0.3461	-3.61891	0.000295849	0.00266879	Y
chr14_37838722_37892154	8.36861	-6.67113	1.84355	-3.61864	0.000296155	0.00266879	Y
chr4_151656410_151729550	77.0007	1.23064	0.34105	3.60838	0.000308112	0.00277301	N
chr9_101542471_101544855	10.9539	6.86055	1.90457	3.60215	0.000315593	0.00283674	Y
chrX_67731691_67742759	42.5579	-1.81562	0.504389	-3.59964	0.000318653	0.00286061	Y
chr17_28808161_28811788	25.7663	2.08898	0.580512	3.5985	0.000320054	0.00286955	Y
chr9_37424842_37426651	90.5904	0.907063	0.252121	3.59772	0.000321013	0.00287451	N
chr4_160107794_160131735	12.3402	-7.09315	1.97311	-3.59492	0.000324493	0.002902	Y
chr16_21623966_21636436	38.0797	-2.26616	0.630655	-3.59335	0.000326458	0.00291589	N
chr7_8043538_8064444	13.9266	-5.45218	1.51897	-3.5894	0.00033144	0.00295666	Y
chr22_45970391_45972988	8.15849	-6.63455	1.84958	-3.58705	0.000334444	0.0029797	Y
chr19_47919909_47920607	18.0093	-5.96517	1.66369	-3.58552	0.000336414	0.00299071	N
chr9_133333788_133342186	8.05348	-6.61591	1.84522	-3.58543	0.000336524	0.00299071	Y
chr16_56900982_56902284	8.53511	-6.69962	1.86908	-3.58444	0.000337802	0.00299831	Y
chr5_131013396_131044965	13.2566	-4.51876	1.26176	-3.58131	0.000341873	0.00303065	Y
chr3_32774915_32778982	35.6304	-1.94258	0.542697	-3.5795	0.00034425	0.00304791	Y
chr1_114372214_114377061	10.9286	6.90794	1.93272	3.57421	0.000351286	0.00310632	Y
chr1_21377359_21437876	7.97824	-6.6023	1.84847	-3.57177	0.000354577	0.00313151	Y
chr2_15629018_15651474	30.0193	-3.03891	0.852117	-3.56631	0.000362048	0.00319351	N
chr12_19646734_19653155	10.1729	-6.47737	1.81646	-3.56593	0.000362574	0.00319417	Y
chr19_1147308_1154401	30.8184	-2.61844	0.734397	-3.56543	0.000363259	0.00319622	Y
chr3_170906491_170912424	22.0154	3.73113	1.04885	3.55737	0.000374591	0.00329185	Y
chr5_172359439_172362313	8.85678	-5.83416	1.64047	-3.55639	0.000375981	0.00329997	Y
chr4_2492064_2502465	31.5246	1.73355	0.487622	3.5551	0.000377831	0.0033121	Y
chr13_20279802_20283739	166.704	0.654656	0.184181	3.55441	0.000378825	0.00331671	N
chr6_20546577_20577388	9.04928	-5.44825	1.53426	-3.55105	0.000383693	0.00335518	Y
chr5_21491430_21501935	46.1168	-2.59499	0.730895	-3.55043	0.000384605	0.00335901	N
chr5_38527257_38530768	8.06688	-6.61825	1.86509	-3.5485	0.000387436	0.00337956	Y
chr7_90355881_90377090	7.87026	-6.58271	1.85647	-3.54582	0.000391386	0.00340983	Y
chr14_100551024_100563995	7.8932	-6.58681	1.85803	-3.54506	0.00039253	0.00341559	Y
chr1_28601336_28605752	21.4195	-4.06051	1.14602	-3.54313	0.000395408	0.0034322	N
chr10_7290510_7327916	7.94004	-6.59554	1.86137	-3.54337	0.000395052	0.0034322	Y
chr5_109049221_109051965	52.5698	-1.43435	0.405219	-3.53969	0.0004006	0.00347301	N
chr2_135010666_135076310	11.7735	6.76834	1.91374	3.53671	0.000405141	0.00350809	Y
chr3_119719399_119721086	11.905	-7.03599	1.99034	-3.53506	0.000407676	0.00352573	Y
chr1_35879573_35881315	35.0589	-1.63049	0.461616	-3.53214	0.000412217	0.00356065	Y
chr17_11958206_12032604	14.4083	4.3374	1.22882	3.52974	0.000415974	0.00358872	Y
chr20_47682729_47683817	26.3182	2.08815	0.592283	3.52559	0.000422544	0.00364097	N
chr1_21377359_21415706	8.86421	-6.75459	1.91791	-3.52186	0.000428533	0.00368809	Y
chr17_77642782_77653884	8.30055	-6.6596	1.89195	-3.51997	0.000431598	0.00370996	Y
chr17_58700882_58711338	62.233	1.51516	0.43058	3.51889	0.00043336	0.00372059	Y
chr13_45725822_45781640	31.1031	-1.72776	0.491613	-3.51446	0.000440644	0.00376943	N
chr16_56906263_56906698	8.07777	-6.62051	1.88371	-3.51461	0.000440403	0.00376943	Y
chr17_40858025_40860101	10.3793	-6.87333	1.95572	-3.51447	0.000440625	0.00376943	Y
chr3_149563798_149613357	7.57532	-5.59546	1.59243	-3.51379	0.000441765	0.00377445	Y
chr2_191523884_191537878	214.293	0.812815	0.231474	3.51147	0.000445636	0.00380294	N
chr11_126051390_126052982	6.57017	7.02158	1.99983	3.51108	0.000446289	0.00380393	Y
chr2_43732761_43755127	9.99166	6.69248	1.90651	3.51034	0.000447541	0.00380544	Y
chr22_28910745_28913267	7.76228	-6.56285	1.86947	-3.51054	0.000447194	0.00380544	Y
chr2_72945232_72958374	28.833	-2.86918	0.81779	-3.50845	0.000450721	0.00382788	Y
chr18_21095820_21099138	10.4577	6.3568	1.81311	3.50603	0.000454848	0.00385831	N
chr19_34685383_34687668	17.5737	-3.38947	0.967253	-3.50422	0.000457944	0.00387992	Y
chr20_62895782_62899363	6.67082	7.04388	2.01097	3.50272	0.000460532	0.00389719	Y
chr4_89570991_89579642	10.2832	-6.85887	1.96024	-3.499	0.00046701	0.0039473	Y
chr6_158994452_159010814	146.951	1.25078	0.357504	3.49864	0.000467629	0.00394782	Y
chr7_959605_966280	6.66242	7.04211	2.01467	3.49542	0.000473314	0.00399105	Y
chr13_51893807_51894187	7.82773	-6.57506	1.88262	-3.4925	0.000478517	0.00403013	Y
chr10_50701163_50714058	7.75695	-6.56188	1.88024	-3.48991	0.00048318	0.00406456	Y
chrX_76872081_76876000	12.2741	-7.06818	2.02551	-3.48957	0.000483796	0.00406492	Y
chr1_219366424_219392054	26.9868	-2.49353	0.715174	-3.48661	0.000489185	0.00410533	Y
chr12_27199087_27219830	8.68357	6.65306	1.90849	3.48604	0.000490231	0.00410924	N
chr6_2116005_2124965	40.643	1.74335	0.500147	3.48568	0.00049089	0.0041099	Y
chr16_47531310_47581459	116.591	-0.785504	0.225414	-3.48471	0.000492669	0.00411992	N
chr15_67956935_68040939	7.70203	-6.55148	1.88207	-3.48099	0.000499562	0.00417264	Y
chr10_7262373_7269899	7.61488	-6.53504	1.87822	-3.47938	0.000502574	0.00419285	Y
chr7_11101418_11101712	20.5357	2.3146	0.665756	3.47664	0.00050773	0.00423089	Y
chr16_29332249_29339945	7.06021	7.12511	2.05238	3.47163	0.000517315	0.00430569	Y
chr11_11901724_11919240	8.04594	-6.61424	1.90568	-3.4708	0.000518902	0.00431383	Y
chr1_12638746_12640694	15.4597	-6.25868	1.80372	-3.46987	0.000520702	0.00432372	Y
chr12_123798167_123800207	23.5038	-2.64237	0.761687	-3.46911	0.000522191	0.004331	N
chr9_14146688_14155892	10.6057	-5.24559	1.51289	-3.46727	0.000525779	0.00435566	N
chr9_88190230_88194011	10.613	-6.37343	1.83934	-3.46507	0.0005301	0.00438633	Y
chr3_33704937_33731424	8.75312	-6.40037	1.84839	-3.46267	0.000534836	0.00442036	Y
chr8_129001408_129022690	27.4853	-3.19665	0.923497	-3.46147	0.00053724	0.00443505	N
chr11_86778736_86802437	87.7351	-0.836749	0.241787	-3.46068	0.000538808	0.00444281	N
chr10_24918925_24924032	7.57794	-6.52818	1.88712	-3.45933	0.000541519	0.00445997	Y
chr12_52139687_52145377	10.508	-6.3687	1.84211	-3.45728	0.000545667	0.00448892	Y
chr7_40037093_40087476	9.79064	-5.72004	1.65495	-3.45631	0.00054762	0.00449976	Y
chrX_79988955_79991587	22.3754	-3.31964	0.961201	-3.45364	0.000553083	0.00453938	N
chr1_89236035_89251896	9.90842	-5.32971	1.54417	-3.4515	0.000557483	0.0045702	N
chr5_170305101_170319557	11.7752	-6.43157	1.86443	-3.44961	0.000561396	0.00459165	Y
chr6_99936076_99958106	6.23099	6.94544	2.01328	3.44981	0.000560973	0.00459165	Y
chr7_47451325_47454804	9.34693	7.3396	2.12793	3.44917	0.000562314	0.00459385	Y
chr12_50385781_50386438	263.858	0.623406	0.180833	3.44741	0.000565982	0.00461721	N
chr12_14018732_14019160	6.21664	6.94223	2.01389	3.44718	0.000566477	0.00461721	Y
chr3_127429419_127441409	9.48099	-6.39346	1.85692	-3.44304	0.000575208	0.00468299	Y
chr15_90984738_90986710	17.244	-3.67649	1.06855	-3.44062	0.000580382	0.00471428	Y
chr22_44229520_44237812	7.59877	-6.53205	1.89845	-3.44073	0.000580141	0.00471428	Y
chr22_32044087_32046764	14.4931	-3.91037	1.13718	-3.43865	0.00058462	0.00474326	Y
chr17_34869272_34871833	7.7738	-5.5088	1.60265	-3.43731	0.000587519	0.00476132	Y
chr9_88284400_88327481	14.2878	-7.13741	2.07712	-3.4362	0.000589938	0.00477546	Y
chr11_103187274_103194718	10.8476	-5.13359	1.49462	-3.43471	0.000593199	0.00479638	Y
chr14_69583083_69589077	67.8359	-1.31242	0.382459	-3.43152	0.0006002	0.00484193	N
chr17_6493099_6503778	16.2142	3.2252	0.939838	3.43166	0.0005999	0.00484193	N
chr7_130737184_130738224	7.64303	-6.54025	1.90734	-3.42898	0.000605853	0.00488198	Y
chr2_239090706_239093928	100.527	1.0816	0.315602	3.42711	0.000610041	0.00491014	N
chr2_188348851_188368497	7.41517	-6.49677	1.89653	-3.4256	0.000613442	0.00493191	Y
chr2_24205766_24207701	52.4552	1.57048	0.458792	3.42307	0.000619182	0.00497241	N
chr7_635783_647089	16.8232	3.89456	1.13819	3.42172	0.000622271	0.00499155	Y
chr7_94248070_94259153	7.72213	-6.55515	1.9165	-3.42038	0.000625337	0.00501048	Y
chr10_12123471_12133683	8.04217	-5.37383	1.573	-3.41629	0.000634794	0.00507956	Y
chr10_7262373_7327916	7.3957	-6.49306	1.90076	-3.41604	0.000635393	0.00507956	Y
chr13_113669077_113699675	6.64422	7.03827	2.0608	3.41532	0.000637076	0.00508727	Y
chr3_196098767_196129890	17.1574	-3.00365	0.879702	-3.4144	0.000639233	0.00509875	Y
chr12_13906251_13906849	6.22907	6.945	2.03495	3.41287	0.000642829	0.00512166	Y
chr8_124089351_124096580	95.9935	1.12701	0.330462	3.4104	0.000648673	0.00516241	Y
chr15_93521464_93522513	17.3644	-3.59179	1.0547	-3.4055	0.000660418	0.0052441	Y
chr6_75078806_75081842	7.41182	-6.49613	1.90748	-3.4056	0.000660183	0.0052441	Y
chr6_42941741_42942776	53.6656	1.57805	0.463441	3.40506	0.000661484	0.00524669	Y
chr17_65941525_65972074	5.69779	6.76654	1.98801	3.40367	0.00066488	0.00526772	Y
chr17_489510_505136	7.56238	6.68177	1.96373	3.4026	0.000667489	0.00528248	Y
chr17_60061532_60062451	40.179	1.58124	0.464799	3.40198	0.000669006	0.00528569	N
chr20_60888144_60888516	7.83595	-5.23926	1.54013	-3.40182	0.000669387	0.00528569	N
chr4_39739040_39757359	10.0677	-6.3883	1.8827	-3.39315	0.000690931	0.00544974	Y
chr11_36415396_36424928	10.4742	-5.12217	1.50999	-3.39218	0.000693385	0.00546301	N
chr1_23356936_23377013	7.87701	-6.53134	1.92598	-3.39117	0.000695955	0.00547717	Y
chr5_170585338_170597207	14.1757	-3.65422	1.07803	-3.38973	0.00069962	0.0054999	Y
chr3_124746049_124748332	9.41895	-6.29587	1.85861	-3.38741	0.000705561	0.00553432	Y
chr8_124798735_124801985	9.01342	-6.27027	1.85099	-3.38752	0.000705288	0.00553432	Y
chr13_96637493_96648389	95.8134	-1.28634	0.379821	-3.38669	0.000707407	0.00554266	Y
chr12_56493432_56494029	8.52073	6.8613	2.02726	3.38452	0.000713036	0.00558059	Y
chr10_52193236_52350007	31.9623	-2.99463	0.886254	-3.37897	0.000727583	0.00568816	Y
chr15_72847612_72864506	7.2591	-6.46596	1.91453	-3.37731	0.000731984	0.00571626	Y
chr1_197611841_197643299	7.46737	-6.50667	1.92818	-3.37452	0.000739449	0.00576819	Y
chr3_47960209_47963368	7.08845	-6.18201	1.83226	-3.37398	0.000740899	0.00577314	Y
chr1_116562203_116563506	7.47617	-6.50833	1.92987	-3.37241	0.000745125	0.00579969	Y
chr2_72945232_72968598	8.76767	-5.24639	1.55589	-3.37196	0.000746343	0.00580279	N
chr3_51575605_51624575	32.8734	2.00695	0.595337	3.37112	0.00074864	0.00581428	Y
chr12_72020040_72022817	21.6464	2.17908	0.646711	3.36948	0.000753089	0.00584242	Y
chr12_111855923_111856681	19.404	3.61934	1.07496	3.36696	0.00076002	0.00588331	Y
chr7_158590633_158591763	14.8343	3.81801	1.13392	3.36708	0.000759692	0.00588331	Y
chr13_60485869_60499004	13.6008	-7.0491	2.09481	-3.36503	0.000765344	0.00591805	Y
chr9_119380603_119382722	9.74208	-6.54178	1.94685	-3.36019	0.000778883	0.00601617	Y
chr5_170319391_170351554	9.17534	-6.25094	1.86064	-3.35957	0.00078065	0.00602325	Y
chr1_225742608_225755116	59.3213	-4.69226	1.39714	-3.35847	0.000783755	0.00604063	N
chr8_48706851_48710958	6.07484	6.90889	2.05784	3.35736	0.000786915	0.00605182	Y
chr8_8011709_8012052	7.17083	-6.44829	1.92064	-3.35736	0.000786898	0.00605182	Y
chr11_128993341_128997200	56.8067	1.20293	0.358432	3.35608	0.000790565	0.00607329	N
chr21_46538479_46554747	17.8218	-4.551	1.35622	-3.35565	0.000791781	0.00607604	Y
chr1_247322308_247323115	96.1726	-0.764797	0.228143	-3.35228	0.000801497	0.0061188	N
chr9_96233423_96261168	360.291	0.606807	0.181016	3.35223	0.000801623	0.0061188	N
chr15_81199004_81201647	5.95983	6.88103	2.05286	3.35192	0.000802536	0.0061188	Y
chr16_70765398_70778482	6.47179	7.00052	2.08795	3.35282	0.000799927	0.0061188	Y
chr5_72151601_72171564	7.86878	-6.58211	1.96287	-3.35331	0.000798512	0.0061188	Y
chr9_86292642_86301070	11.0194	-6.18144	1.84401	-3.35217	0.000801794	0.0061188	Y
chr14_70442432_70461197	7.1262	-6.43948	1.92131	-3.35161	0.000803427	0.00611901	Y
chr6_20781376_20955816	8.3555	7.21008	2.152	3.35041	0.000806917	0.00613898	Y
chr1_233225807_233231609	8.1471	-6.24829	1.86528	-3.34978	0.000808744	0.00614628	N
chrX_322140_323067	119.834	-1.3235	0.395347	-3.34769	0.000814867	0.00618618	Y
chr1_51001041_51061888	29.1071	1.90024	0.567706	3.34723	0.000816246	0.00619001	Y
chr17_38652239_38652772	16.0164	5.01868	1.4997	3.34645	0.000818533	0.00619821	N
chr1_175956079_175958615	9.86889	-6.20121	1.85317	-3.34627	0.000819077	0.00619821	Y
chr5_76342172_76344097	53.4475	-1.39492	0.417063	-3.34462	0.000823946	0.0062284	Y
chr2_190656516_190670480	67.4587	1.2996	0.38876	3.34294	0.000828959	0.00625961	Y
chr2_242514536_242523001	5.65009	6.80414	2.03691	3.34043	0.0008365	0.0063086	Y
chr21_26793020_26796961	5.77324	6.83548	2.04644	3.34018	0.000837227	0.0063086	Y
chr9_138741983_138774924	33.7475	1.96706	0.589112	3.33903	0.00084072	0.00632818	N
chr1_10155519_10165802	68.1274	-1.19668	0.358588	-3.33719	0.000846298	0.0063587	N
chr16_72122886_72124685	30.9655	2.0618	0.617842	3.3371	0.00084657	0.0063587	Y
chr2_47600602_47602438	9.64998	7.33195	2.2007	3.33164	0.00086336	0.00647109	Y
chr3_197592294_197598333	18.8381	-3.26617	0.980275	-3.33189	0.000862582	0.00647109	Y
chr12_20774230_20792891	7.55116	-6.52281	1.95867	-3.33023	0.000867731	0.00649698	Y
chr13_113669077_113679072	5.90452	6.86805	2.06257	3.32985	0.000868937	0.00649913	Y
chr16_11647389_11650591	20.5036	-2.57321	0.772925	-3.32919	0.000870988	0.00650761	Y
chr11_18305342_18308257	10.529	-6.27569	1.88611	-3.32732	0.000876862	0.00654458	Y
chr22_46572650_46594488	7.0455	-6.423	1.93124	-3.32584	0.000881514	0.00657238	Y
chr6_87920169_87928449	97.7769	-0.896558	0.269837	-3.32259	0.000891856	0.0066425	N
chr11_46098305_46113774	205.096	-0.704677	0.212173	-3.32123	0.000896205	0.00666788	N
chr7_117825701_117828459	8.29176	-5.41949	1.63248	-3.31979	0.000900837	0.00669531	Y
chr15_49880213_49882204	7.04413	-6.42273	1.93622	-3.31714	0.000909426	0.00675206	Y
chr7_158580695_158591763	291.249	-0.801064	0.241538	-3.31651	0.000911488	0.00676028	N
chr5_65288538_65290692	12.1843	-6.9447	2.09484	-3.31515	0.000915937	0.00678618	Y
chr13_47297356_47303119	8.37957	6.24809	1.88532	3.31406	0.000919503	0.00680547	Y
chr1_56977648_56990226	6.18192	6.84328	2.06514	3.31371	0.00092067	0.006807	Y
chr14_76184204_76187046	9.12267	-5.30584	1.60149	-3.31306	0.0009228	0.00681563	N
chr6_160412216_160431817	22.3656	-2.05919	0.622876	-3.30594	0.000946595	0.00698409	N
chr19_13039156_13039661	65.2728	1.10724	0.335081	3.30439	0.000951825	0.00701538	N
chr2_135007621_135012215	18.2095	2.97486	0.901985	3.29813	0.000973312	0.00715027	N
chr5_151169884_151170623	86.6246	0.963638	0.292143	3.29852	0.000971959	0.00715027	N
chr8_145737775_145738154	23.9809	2.4083	0.730257	3.29788	0.000974166	0.00715027	N
chr7_23015829_23023664	6.96368	-6.4061	1.94218	-3.29841	0.000972343	0.00715027	Y
chr5_170336665_170351554	8.62573	-6.20873	1.88445	-3.29472	0.000985195	0.00722374	Y
chr4_77055328_77065626	8.27355	-6.22922	1.89228	-3.29191	0.000995097	0.0072888	Y
chr13_96837104_96840751	7.05057	-6.42402	1.95194	-3.29109	0.000997995	0.00730248	Y
chr1_16119332_16123438	8.3965	-6.21618	1.88904	-3.29065	0.000999569	0.00730644	Y
chr14_45481178_45497532	7.7555	-6.17685	1.87936	-3.28668	0.00101377	0.00740262	Y
chr5_179135240_179136060	24.2725	1.94517	0.59255	3.28271	0.00102816	0.00749279	N
chr12_11187381_11199787	152.778	-4.16356	1.26834	-3.28268	0.00102824	0.00749279	Y
chr11_73418465_73431944	97.1281	-1.47339	0.448986	-3.28159	0.00103222	0.00750638	Y
chr13_43639822_43659974	8.3639	6.47061	1.97171	3.28172	0.00103175	0.00750638	Y
chr5_112868576_112871495	14.9359	-3.46022	1.05461	-3.28104	0.00103425	0.00751342	Y
chr11_20424465_20448411	85.6782	1.39112	0.42407	3.28039	0.00103662	0.00752294	Y
chr3_185316200_185331196	5.36312	6.72883	2.05155	3.27987	0.00103856	0.00752929	Y
chr16_66632081_66632743	5.62641	6.7983	2.07333	3.27893	0.001042	0.00754654	Y
chr1_178745817_178754742	8.65943	-6.17325	1.88359	-3.27739	0.00104771	0.00758008	Y
chr14_31765115_31771725	8.73762	-6.2195	1.89788	-3.27709	0.00104884	0.00758052	Y
chr3_119624602_119666198	6.90356	-6.39345	1.95122	-3.27664	0.00105049	0.00758473	Y
chr9_94518353_94538100	7.72157	-5.15421	1.57369	-3.27525	0.0010557	0.00761061	N
chr6_111726673_111737675	23.0732	-3.44134	1.05076	-3.27511	0.00105622	0.00761061	Y
chr1_214089278_214139601	5.78568	6.83845	2.0887	3.27403	0.00106025	0.00763187	Y
chr3_122422589_122427115	18.708	-3.63259	1.10968	-3.27354	0.00106208	0.00763727	N
chr3_149563798_149639014	201.633	-0.806376	0.246371	-3.27301	0.00106407	0.00764385	N
chr19_10368898_10369361	9.88257	6.04242	1.84689	3.27167	0.00106916	0.00767257	N
chr2_234296903_234307095	23.7865	2.65873	0.812933	3.27053	0.00107345	0.00768784	N
chr12_121220458_121229360	13.3786	-4.79387	1.46576	-3.27057	0.00107332	0.00768784	Y
chr15_33180373_33194241	10.5308	5.74885	1.75819	3.26975	0.00107642	0.00770127	N
chr14_45705017_45706924	16.2575	-4.10044	1.25449	-3.26861	0.00108079	0.00772473	Y
chr1_61798184_61824946	6.80302	-6.37232	1.95231	-3.26399	0.00109855	0.00783763	Y
chr14_51107468_51111732	51.2977	-1.37919	0.42259	-3.26366	0.00109985	0.00783763	Y
chr3_18082941_18105554	5.35928	6.72783	2.06145	3.26364	0.0010999	0.00783763	Y
chr7_101870647_101870949	9.32851	6.0174	1.84557	3.26047	0.0011123	0.00791799	N
chr7_129679304_129688984	65.6567	1.28847	0.395248	3.2599	0.00111453	0.00792591	N
chr4_103446669_103459113	56.9466	-4.09872	1.25772	-3.25885	0.00111863	0.00794711	N
chr5_95084037_95103870	7.4194	-6.42255	1.97228	-3.25641	0.0011283	0.00800776	Y
chr1_9991949_9994918	178.967	0.771819	0.237123	3.25493	0.00113422	0.00804169	N
chr1_42730786_42789498	7.30128	-6.16225	1.897	-3.24843	0.00116045	0.00821948	N
chr11_121348827_121367758	5.33057	6.72039	2.06996	3.24663	0.0011678	0.00826323	Y
chr4_4650704_4651269	100.468	-0.758886	0.233842	-3.2453	0.00117329	0.00827728	N
chr13_111303381_111319820	5.22178	6.69021	2.06134	3.24556	0.0011722	0.00827728	Y
chr14_45618040_45628483	6.9059	-6.39434	1.97013	-3.24564	0.00117188	0.00827728	Y
chr2_242593961_242594758	5.877	6.86151	2.11541	3.24358	0.00118039	0.00831707	Y
chr7_155556503_155567341	19.0305	2.16405	0.667223	3.24336	0.00118128	0.00831707	Y
chr9_33960824_33973235	54.0514	2.23424	0.68896	3.24291	0.00118314	0.00832194	Y
chr1_224918164_224922408	5.22489	6.69103	2.06439	3.24117	0.0011904	0.00835827	Y
chr12_112086984_112087575	12.4334	-6.90336	2.12994	-3.24111	0.00119067	0.00835827	Y
chr11_8987451_8989588	6.82185	-6.37665	1.96763	-3.24077	0.00119208	0.00835987	Y
chr16_27224906_27226329	82.3231	-0.799724	0.246798	-3.2404	0.00119362	0.00836243	N
chr12_49227060_49228280	6.04539	6.90208	2.13025	3.24004	0.00119514	0.00836482	Y
chr15_56216844_56258744	7.09917	-6.4341	1.9864	-3.23907	0.00119919	0.00838485	Y
chr3_23541099_23574192	57.1778	-2.10748	0.650858	-3.23801	0.00120367	0.00840788	Y
chr16_85810161_85814886	9.17192	6.28604	1.94162	3.23752	0.00120572	0.00841392	N
chr1_7837220_7838229	41.1924	1.70771	0.528079	3.23382	0.00122146	0.00851539	N
chr11_883148_884169	20.2615	4.29318	1.32848	3.23165	0.00123077	0.00857179	Y
chr2_24787164_24807429	45.4738	1.26348	0.39109	3.23065	0.0012351	0.00859354	N
chr12_122973933_122977336	14.7198	-4.64884	1.43974	-3.22894	0.00124248	0.00863639	Y
chrX_149962164_149984551	9.0311	-5.0739	1.57187	-3.22794	0.00124683	0.00865815	N
chr17_29061917_29096983	9.31422	5.90254	1.82983	3.22574	0.00125649	0.00869961	N
chr11_70200407_70208594	40.5369	2.45806	0.761966	3.22595	0.00125557	0.00869961	Y
chr4_17910717_17974508	6.24321	-5.47286	1.69641	-3.22614	0.00125473	0.00869961	Y
chr2_135011833_135012215	7.77594	6.51359	2.01954	3.22529	0.00125846	0.00870479	Y
chr6_87925621_87943245	22.9512	-4.55954	1.41455	-3.22331	0.00126717	0.00875642	Y
chr22_40915468_40948371	6.21416	-6.19762	1.92406	-3.22111	0.00127695	0.00881546	Y
chr16_21979949_21987564	25.1649	1.54284	0.479189	3.21968	0.00128334	0.00885091	N
chr1_70650468_70654956	6.89722	-6.39256	1.98629	-3.21835	0.0012893	0.00887844	Y
chr7_8062113_8110761	9.65872	-6.71029	2.08509	-3.21823	0.00128984	0.00887844	Y
chr10_93220184_93221941	6.5883	-6.3262	1.966	-3.2178	0.00129177	0.0088831	Y
chr1_44773982_44785416	172.01	-0.66213	0.205826	-3.21693	0.00129568	0.00890138	N
chr2_175976296_175986268	9.98747	-4.91554	1.52828	-3.21639	0.00129815	0.00890968	N
chr3_4403723_4452662	6.81702	-6.37523	1.98334	-3.21439	0.0013072	0.00896311	Y
chr9_119093523_119097353	6.72788	-6.35665	1.9779	-3.21383	0.00130976	0.00897199	Y
chr7_77407655_77408131	75.0561	0.939354	0.292564	3.21076	0.00132384	0.0090597	N
chr3_67546222_67571058	36.7539	-1.59811	0.497851	-3.21001	0.00132731	0.00907463	N
chr4_7840251_7857301	6.82248	-6.37636	1.98784	-3.20769	0.00133805	0.00913926	Y
chr8_28827560_28828036	8.50468	-5.00666	1.56158	-3.20615	0.00134526	0.00917966	N
chr15_78337242_78346529	31.0353	-2.23335	0.696925	-3.20457	0.00135263	0.00922104	Y
chr9_90313571_90315152	6.59053	-6.32668	1.97469	-3.20388	0.00135589	0.00923439	Y
chr15_67923226_67956983	9.62822	-6.70523	2.09387	-3.20231	0.00136328	0.00927581	N
chr17_41201138_41209152	10.2663	6.30616	1.9697	3.20159	0.00136672	0.00929025	Y
chr10_96201653_96234540	66.7475	-1.11386	0.348046	-3.20031	0.00137278	0.00931359	N
chr1_160293221_160302347	23.7135	-3.64508	1.13889	-3.20054	0.00137168	0.00931359	Y
chr19_11223954_11224438	30.418	1.61436	0.50454	3.19966	0.00137588	0.00931705	N
chr1_151288049_151288985	7.58209	-5.42569	1.69571	-3.19966	0.00137592	0.00931705	Y
chr17_58342773_58346918	7.76713	-6.11255	1.91213	-3.19673	0.00138996	0.00940314	Y
chr7_2405952_2409317	9.60709	4.0938	1.28076	3.19638	0.00139163	0.00940481	N
chr17_17045941_17046983	9.25051	4.34931	1.36093	3.19585	0.00139419	0.00940481	Y
chr7_23015829_23030758	10.2437	-5.04662	1.57904	-3.196	0.00139345	0.00940481	Y
chr17_46189393_46190022	8.59542	4.68246	1.46616	3.19368	0.00140471	0.00946678	Y
chr18_19144164_19148055	33.7232	-1.47442	0.461891	-3.19213	0.00141226	0.0095086	N
chr4_110412483_110416012	39.9329	-2.10629	0.660107	-3.19083	0.00141864	0.00954246	N
chr7_943763_959687	4.91972	6.60428	2.0701	3.19032	0.00142117	0.00955044	Y
chr5_170597134_170610434	8.42651	-6.06349	1.90085	-3.18988	0.0014233	0.00955566	Y
chr5_127800417_127866386	6.86933	-6.38644	2.00226	-3.18961	0.00142466	0.00955577	Y
chr4_139100371_139106398	6.62761	-6.3346	1.98672	-3.18847	0.00143026	0.00955713	Y
chr5_170305101_170308900	33.7053	-3.22641	1.01183	-3.18867	0.00142927	0.00955713	Y
chr8_128231055_128236720	6.41251	-6.28715	1.97177	-3.18859	0.00142969	0.00955713	Y
chr9_127818155_127828337	7.82894	-6.48562	2.03381	-3.1889	0.00142813	0.00955713	Y
chr5_37142412_37148370	7.32929	-6.47959	2.03283	-3.18748	0.00143518	0.00958095	Y
chr7_56150971_56151408	11.9391	3.90464	1.22589	3.18515	0.00144681	0.00964949	Y
chr13_99890681_99896878	92.9714	1.16851	0.366958	3.18431	0.00145098	0.00965001	N
chr3_72873575_72893574	5.5536	-5.06287	1.58981	-3.18458	0.00144963	0.00965001	N
chr15_94039463_94041986	5.16601	6.67532	2.0963	3.18433	0.0014509	0.00965001	Y
chr15_45467417_45470504	15.8081	4.53462	1.42429	3.18378	0.00145364	0.00965863	Y
chr19_35749848_35750724	8.77959	6.45732	2.02844	3.18338	0.00145565	0.00966294	Y
chr8_141900642_141900868	6.8878	-6.39023	2.01147	-3.17689	0.00148863	0.00987265	Y
chr10_11789348_11797607	6.46718	-6.29958	1.98374	-3.1756	0.00149526	0.00990733	Y
chr3_32479447_32483505	20.7772	2.72642	0.858881	3.17439	0.00150151	0.00993943	N
chr19_44237010_44237885	10.3192	-4.86568	1.5333	-3.17334	0.00150694	0.00994945	N
chr19_56657616_56658577	6.19545	6.93639	2.1856	3.17368	0.00150522	0.00994945	N
chr2_72958136_72960247	7.6471	-6.05605	1.90845	-3.17329	0.00150724	0.00994945	Y
chr9_102814699_102822454	52.3537	-1.14795	0.361825	-3.17268	0.00151038	0.00996089	N
chr11_128910823_128936763	34.9778	2.95658	0.933212	3.16817	0.001534	0.0101073	Y
chr18_18945988_18964364	6.51156	-6.30923	1.99217	-3.16702	0.00154011	0.0101381	Y
chr17_29483001_29491097	6.44637	-6.29458	1.98825	-3.16589	0.0015461	0.0101681	Y
chr11_9304918_9309353	6.44314	-6.29387	1.99008	-3.16263	0.00156351	0.0102731	Y
chr15_80762559_80767564	4.75397	6.55505	2.07305	3.16203	0.00156673	0.0102847	Y
chr13_36939637_36943737	6.4254	-6.28999	1.98955	-3.16152	0.00156949	0.0102932	Y
chr17_30310018_30315516	64.9213	1.38646	0.438639	3.16082	0.00157325	0.0103083	N
chr16_72556452_72604414	11.1253	5.01411	1.58807	3.15737	0.001592	0.0104215	Y
chr10_65140078_65169748	7.69488	-6.05135	1.9178	-3.15536	0.001603	0.0104839	Y
chr4_79158664_79176529	11.4688	5.7448	1.82166	3.15361	0.00161266	0.0105373	N
chr12_50821545_50829407	48.0266	1.33609	0.423897	3.15191	0.00162205	0.0105889	N
chr7_156619299_156629579	354.91	-0.474827	0.150672	-3.15139	0.00162496	0.0105982	N
chr8_37971710_37978667	40.3866	1.50321	0.477164	3.1503	0.00163101	0.0106278	N
chr5_138994171_138994551	30.426	-1.52425	0.483915	-3.14983	0.00163364	0.0106352	N
chr8_17532695_17573410	6.35252	-6.27343	1.99284	-3.14798	0.00164403	0.010693	Y
chr18_11752852_11753944	6.38214	-6.28045	1.99548	-3.14734	0.0016476	0.0107064	Y
chr5_37221426_37224842	10.9001	-6.77162	2.15174	-3.14705	0.00164927	0.0107074	Y
chr6_139264650_139265759	73.4809	0.939976	0.29901	3.14363	0.00166867	0.0108234	N
chr4_177632653_177650900	6.34062	-6.27078	1.99532	-3.14275	0.00167371	0.0108462	Y
chr2_61552510_61561106	5.61748	-5.11968	1.63002	-3.14086	0.00168451	0.0109062	N
chr3_72830456_72842187	9.64916	-6.06071	1.93008	-3.14014	0.00168868	0.0109232	Y
chr13_47285926_47308133	12.6479	5.00467	1.59547	3.13681	0.00170798	0.011038	Y
chr6_17507400_17514185	25.859	-2.72672	0.869579	-3.13567	0.0017146	0.0110706	Y
chr5_83356119_83362425	6.2402	-6.24779	1.9927	-3.13534	0.00171653	0.011073	Y
chr9_118997418_118997916	6.56526	-6.32083	2.01627	-3.13491	0.00171906	0.0110792	Y
chr1_51005264_51061888	43.5707	1.30098	0.415238	3.13309	0.00172974	0.011138	N
chr12_29904599_29921008	6.2128	-6.24159	1.99276	-3.13213	0.00173543	0.0111635	Y
chr2_85097349_85097909	6.52506	-6.31258	2.01558	-3.13189	0.00173686	0.0111635	Y
chr1_176118142_176145143	16.5611	-2.67124	0.853128	-3.13111	0.00174147	0.011183	N
chr7_83758439_83823984	4.90272	6.59949	2.10832	3.13021	0.00174684	0.0112073	Y
chr3_136136727_136141886	7.14709	-5.16045	1.65049	-3.12662	0.00176831	0.0113245	N
chr7_6472468_6476164	92.6195	-1.05068	0.336017	-3.12687	0.00176677	0.0113245	N
chr2_143642918_143718339	6.14412	-6.22543	1.99279	-3.12398	0.00178423	0.0114162	Y
chr3_31774749_31789612	8.06935	-4.86236	1.55689	-3.12312	0.00178944	0.0114392	N
chr7_158704241_158711560	65.7683	-1.165	0.373132	-3.12221	0.00179496	0.0114641	N
chrX_72797243_72804408	46.177	-1.23039	0.394127	-3.12182	0.00179738	0.0114692	N
chr4_140037803_140060651	19.5612	-4.13988	1.32624	-3.12152	0.0017992	0.0114705	Y
chr13_50279757_50280508	28.3973	2.01174	0.644637	3.12072	0.00180406	0.0114809	N
chr5_79974746_80057497	19.5409	-3.04511	0.975715	-3.1209	0.00180296	0.0114809	Y
chr4_107216251_107230146	8.18026	-6.07516	1.94712	-3.12007	0.00180807	0.011496	Y
chr14_37969113_37969343	7.10688	-6.43527	2.06315	-3.11915	0.00181371	0.0115215	Y
chr7_8043538_8110761	31.3603	-8.51069	2.72966	-3.11786	0.00182172	0.011562	Y
chr19_47865733_47865950	77.0816	0.838854	0.269197	3.11613	0.0018324	0.0116194	N
chr16_23113640_23120102	7.82145	7.0634	2.2677	3.11478	0.00184081	0.0116623	Y
chr12_70671912_70713144	18.5235	-3.12864	1.00503	-3.11299	0.00185199	0.0117011	N
chr13_61013822_61041513	357.788	0.697911	0.224229	3.11249	0.00185519	0.0117011	N
chr3_48960181_48965246	7.36254	-6.38871	2.05258	-3.11253	0.0018549	0.0117011	Y
chr6_111281617_111283708	5.01461	6.63244	2.13073	3.11276	0.00185345	0.0117011	Y
chr8_71550050_71553285	54.8	-4.74442	1.52405	-3.11304	0.00185172	0.0117011	Y
chr10_121663596_121668642	14.9549	3.80011	1.22274	3.10787	0.00188443	0.0118749	N
chr4_174213259_174225269	6.29287	6.96018	2.24018	3.10697	0.00189013	0.0119003	Y
chr6_158850768_158852695	19.4408	2.43162	0.782911	3.10587	0.00189721	0.0119342	N
chr2_156666440_156668476	9.35916	7.15348	2.30404	3.10475	0.0019044	0.0119688	Y
chr1_231084645_231097049	4.46699	6.46508	2.08252	3.10444	0.00190637	0.0119706	Y
chr1_53351505_53358647	6.14859	-6.22646	2.00606	-3.10382	0.00191041	0.0119853	Y
chr15_91256398_91258273	6.3892	-6.20575	1.99983	-3.10314	0.00191482	0.0120023	Y
chr3_8784145_8794910	6.3494	-6.27319	2.02206	-3.10237	0.00191975	0.0120226	Y
chr15_83301923_83310433	6.11027	-6.21765	2.00453	-3.1018	0.00192348	0.0120247	Y
chr9_99083280_99084362	4.72645	6.54702	2.11054	3.10206	0.0019218	0.0120247	Y
chr14_91947920_91952074	46.4586	-1.69986	0.548421	-3.09956	0.00193811	0.0121055	N
chr17_19445706_19454781	6.12243	-6.22045	2.00728	-3.09894	0.00194213	0.0121199	Y
chr11_47837031_47841010	35.2601	1.32965	0.429201	3.09797	0.00194854	0.0121409	N
chr3_122928046_122978436	9.52535	-6.06602	1.9581	-3.09791	0.00194892	0.0121409	Y
chr13_101910794_101944717	6.4455	-6.29439	2.03397	-3.09463	0.00197057	0.0122587	Y
chr7_83739786_83823984	4.64016	6.51963	2.10683	3.09452	0.0019713	0.0122587	Y
chr14_40124049_40125012	14.2037	2.37073	0.76662	3.09245	0.00198513	0.0123339	Y
chr3_111828390_111831992	8.81534	-4.6863	1.5161	-3.09103	0.00199466	0.0123714	N
chr2_78426731_78430944	8.50369	-6.1224	1.9807	-3.09103	0.00199464	0.0123714	Y
chr6_168910595_168949883	4.61025	6.5107	2.10672	3.09044	0.00199857	0.0123848	Y
chr12_104712691_104715094	6.13953	-6.22438	2.01426	-3.09015	0.00200053	0.0123861	Y
chr3_129684544_129690951	7.38156	5.97519	1.93553	3.08711	0.00202111	0.0124917	N
chr17_28808161_28819771	8.01241	-5.96953	1.93359	-3.08728	0.00201994	0.0124917	Y
chr3_12421203_12434251	5.84201	-5.86696	1.90144	-3.08554	0.00203184	0.0125471	Y
chr1_51253672_51323669	16.0325	-3.33386	1.08075	-3.08476	0.00203717	0.012569	Y
chr11_63918711_63919865	31.2344	3.37663	1.09478	3.0843	0.00204029	0.0125773	Y
chr19_9643521_9645955	10.0017	-6.05393	1.96347	-3.08327	0.00204736	0.01261	Y
chr6_5404775_5431405	118.743	-1.10224	0.357983	-3.07904	0.00207672	0.0127686	N
chr7_151927008_151935911	7.52404	-6.00719	1.95099	-3.07904	0.00207667	0.0127686	N
chr12_19615444_19619784	5.08689	-5.16301	1.6787	-3.0756	0.00210081	0.0129055	N
chr6_168944305_168999684	4.44185	6.4573	2.09976	3.07526	0.00210318	0.0129089	Y
chr1_212502477_212506940	56.0676	-4.09058	1.33065	-3.07412	0.00211121	0.0129357	Y
chr16_24979672_24981901	7.9877	-5.91596	1.92432	-3.07432	0.00210986	0.0129357	Y
chr1_197552282_197614873	10.8036	-6.68088	2.1741	-3.07295	0.00211956	0.0129644	N
chrX_62729824_62736962	8.15282	-6.48055	2.10882	-3.07307	0.00211871	0.0129644	Y
chr14_71970329_71996087	14.8979	-5.46103	1.77814	-3.07121	0.00213193	0.013027	N
chr10_93870833_93952393	6.00998	-6.19382	2.01688	-3.07099	0.00213347	0.013027	Y
chr16_72651082_72651452	23.082	3.82136	1.24481	3.06983	0.00214184	0.0130669	Y
chr16_960931_1004666	40.3018	2.23687	0.728927	3.06872	0.00214978	0.013104	Y
chr20_60714131_60716000	67.3942	-0.863845	0.281596	-3.06767	0.00215733	0.0131388	N
chr2_183531127_183539245	8.80015	7.06637	2.3064	3.06381	0.00218541	0.0132983	Y
chr3_149563798_149570383	8.50626	-5.87741	1.91906	-3.06265	0.00219389	0.0133385	Y
chr20_32207323_32211102	74.8291	0.917274	0.299705	3.06059	0.00220904	0.0133977	N
chr17_76388557_76400170	4.43372	6.45477	2.10876	3.06093	0.00220652	0.0133977	Y
chr2_215632206_215646233	49.9547	-2.06705	0.675386	-3.06055	0.00220931	0.0133977	Y
chr20_36685934_36694658	132.138	0.886659	0.28988	3.05871	0.00222291	0.0134686	N
chr10_65140078_65214849	27.406	-1.98038	0.647524	-3.05839	0.0022253	0.0134716	Y
chr11_9225207_9229179	14.6229	-3.62617	1.18609	-3.05725	0.00223377	0.0135113	N
chr7_77394812_77408131	9.4056	5.46397	1.78776	3.05633	0.00224067	0.0135415	N
chr10_75848954_75984349	6.04023	-6.2009	2.02931	-3.05567	0.00224558	0.0135596	Y
chr1_214139414_214141405	4.57003	6.49858	2.12756	3.05447	0.00225455	0.0136022	Y
chr11_68190957_68193655	14.3489	2.10462	0.689273	3.05338	0.00226276	0.0136287	N
chr19_46357433_46357765	33.4136	1.60243	0.524806	3.05338	0.00226279	0.0136287	N
chr16_72984368_72984864	7.43749	-5.88962	1.92943	-3.05252	0.00226931	0.0136564	Y
chr12_79986391_79990438	6.05437	-6.20419	2.0327	-3.05219	0.00227177	0.0136595	Y
chr2_174223440_174224219	52.5623	1.10854	0.363295	3.05135	0.00227817	0.0136864	N
chr5_37697757_37703189	10.2249	-3.80201	1.24651	-3.05013	0.00228743	0.0137304	N
chr16_66847467_66847749	5.76902	6.68182	2.19156	3.04888	0.00229693	0.0137702	Y
chr9_16727795_16738483	8.00032	-6.46005	2.11892	-3.04875	0.00229796	0.0137702	Y
chr4_42020128_42025401	5.87771	-6.16143	2.02174	-3.04759	0.00230685	0.0138119	Y
chr2_143676178_143685310	5.86272	-6.15783	2.02181	-3.0457	0.00232136	0.013887	Y
chr4_79747191_79754841	19.452	1.9709	0.64792	3.04189	0.00235098	0.0140523	N
chr17_76410960_76415756	4.42558	6.45223	2.12167	3.04111	0.00235704	0.0140767	N
chr5_134388144_134411078	50.5443	-1.29198	0.424941	-3.04038	0.00236283	0.0140993	N
chr12_27824364_27827154	9.77485	-4.80646	1.58124	-3.03967	0.00236838	0.0141206	N
chr4_184749331_184751143	5.77085	-6.13505	2.01982	-3.03742	0.00238614	0.0142145	Y
chr20_34312492_34313077	41.3644	1.14913	0.378363	3.0371	0.00238867	0.0142176	N
chr3_119582266_119624699	25.3031	-2.15063	0.708346	-3.03614	0.00239631	0.0142511	N
chr5_38991051_39021238	107.387	-1.15801	0.381592	-3.03469	0.00240783	0.0143076	Y
chr11_65269792_65272066	5.75349	-6.13081	2.02064	-3.03408	0.00241267	0.0143243	Y
chr17_29483001_29490394	39.0056	-1.88099	0.620138	-3.03317	0.00241996	0.0143556	Y
chr5_138654597_138655190	7.2375	6.96108	2.29767	3.02962	0.00244858	0.0145132	Y
chr1_21327692_21329301	33.4712	-2.21185	0.730288	-3.02874	0.00245578	0.0145437	Y
chr11_46098305_46105853	51.4908	-1.34344	0.443717	-3.0277	0.00246419	0.0145813	N
chr6_7861684_7862731	6.00318	-6.19173	2.04801	-3.02329	0.00250043	0.0147834	Y
chr10_126776760_126811437	5.8973	-6.16613	2.04019	-3.02232	0.00250844	0.0148124	Y
chr17_15843339_15843741	6.29996	-6.26127	2.07177	-3.02219	0.00250951	0.0148124	Y
chr14_71492834_71502874	6.08185	-5.8414	1.93334	-3.0214	0.00251608	0.0148388	Y
chr5_167995651_167996003	5.80582	-6.14356	2.03416	-3.02019	0.00252617	0.0148859	Y
chr17_80521230_80529746	12.4268	-5.79775	1.91999	-3.01968	0.00253041	0.0148985	N
chr1_41578955_41608784	44.8652	-1.96038	0.649451	-3.01851	0.00254017	0.0149436	Y
chr8_70667659_70674110	4.89987	6.59868	2.18706	3.01716	0.00255159	0.0149983	Y
chr1_109200073_109202584	8.39428	-5.83168	1.93316	-3.01666	0.00255577	0.0150104	Y
chr11_103182607_103194718	5.68482	-6.11334	2.02749	-3.01523	0.00256788	0.0150619	Y
chr20_37630373_37634999	4.42055	6.45064	2.13943	3.01512	0.0025688	0.0150619	Y
chr5_54941617_54960691	5.66077	-6.10737	2.02651	-3.01374	0.00258046	0.0151178	Y
chr11_122953793_122955421	5.97465	-6.18501	2.05298	-3.0127	0.00258932	0.0151572	Y
chr5_1032267_1038837	4.56572	6.49726	2.15957	3.0086	0.00262458	0.0153509	Y
chr3_12343020_12353952	6.64568	-6.33884	2.10772	-3.00745	0.00263453	0.0153964	Y
chr17_41576230_41577471	52.578	1.06778	0.355431	3.00417	0.00266309	0.0155419	N
chr3_36524484_36527741	5.80595	-6.14359	2.04508	-3.00408	0.00266383	0.0155419	Y
chr9_123952832_123955697	5.67614	-6.11119	2.03461	-3.00362	0.00266792	0.015553	Y
chr11_106810186_106810904	5.66609	-6.1087	2.03402	-3.00327	0.00267098	0.015558	Y
chr5_130883740_130940386	43.5305	-2.08353	0.693829	-3.00294	0.00267382	0.0155618	N
chr14_53558503_53570574	8.97115	-4.8623	1.61965	-3.00207	0.0026815	0.0155937	Y
chr10_70218861_70229920	87.0131	-1.2964	0.432101	-3.00023	0.00269775	0.0156753	Y
chr17_73038276_73038754	12.7558	-3.78823	1.26337	-2.99852	0.00271295	0.0157507	N
chr12_120995085_120995485	36.6951	-1.63434	0.545126	-2.99811	0.00271663	0.0157591	N
chr1_53343354_53358647	5.61057	-6.09427	2.03597	-2.9933	0.00275979	0.0159964	Y
chr3_171799153_171851336	9.00901	-6.53199	2.18317	-2.99197	0.00277183	0.016053	N
chr2_136360070_136362586	35.1728	1.44871	0.484596	2.98952	0.00279418	0.0161429	N
chr3_169863211_169867032	43.2395	-2.51527	0.841354	-2.98955	0.00279387	0.0161429	N
chr2_85188797_85194004	7.65182	6.93272	2.31893	2.98961	0.0027933	0.0161429	Y
chr8_25101190_25136181	9.72698	-6.57836	2.20245	-2.98684	0.00281875	0.0162716	Y
chr1_94140170_94140497	35.625	-1.94782	0.652384	-2.9857	0.00282934	0.0163194	N
chr9_22046750_22056386	70.0543	-2.89311	0.969291	-2.98477	0.00283789	0.0163554	Y
chr2_198367763_198368054	25.7137	1.84328	0.618081	2.98226	0.00286131	0.0164636	N
chr3_36570188_36576152	5.62036	-6.09673	2.0442	-2.98245	0.00285954	0.0164636	Y
chr14_62188227_62188541	71.0038	-1.26432	0.424277	-2.97995	0.00288298	0.0165748	Y
chr22_26853825_26854543	20.7536	2.67673	0.899054	2.97727	0.00290829	0.0167067	N
chr17_29086509_29096983	6.89348	-5.83527	1.96061	-2.97625	0.00291801	0.0167377	Y
chr9_2652944_2668061	6.02597	-6.19756	2.08237	-2.9762	0.00291841	0.0167377	Y
chr7_105517627_105553084	11.1095	5.03648	1.69272	2.97538	0.00292622	0.016769	N
chr4_140616351_140625350	8.22872	-6.44662	2.16735	-2.97443	0.00293534	0.0168076	Y
chr16_14645878_14649566	9.61534	-6.55637	2.20693	-2.97081	0.00297016	0.0169933	N
chr1_16116601_16123438	5.55489	-6.08022	2.04699	-2.97032	0.00297492	0.0170067	Y
chr19_18258253_18258434	37.1979	2.29326	0.772388	2.96905	0.00298719	0.0170631	Y
chr10_4872867_4950612	7.60019	5.57301	1.87798	2.96755	0.00300184	0.017133	N
chr10_69966527_69970304	5.63349	-6.10056	2.05627	-2.96681	0.00300904	0.0171603	Y
chr5_37238959_37239971	16.0206	-4.58951	1.54792	-2.96496	0.00302727	0.0172503	Y
chr3_67546222_67548719	51.2008	-2.12793	0.718154	-2.96306	0.00304597	0.0173429	N
chr12_96717726_96728643	42.6658	-1.32132	0.446	-2.9626	0.00305054	0.017355	N
chr12_11181000_11273779	5.9687	-6.18406	2.08784	-2.96194	0.00305707	0.0173782	Y
chr6_89554076_89563483	46.731	1.33024	0.449241	2.96108	0.00306561	0.0174127	N
chr11_118454524_118455359	21.3399	1.88434	0.636762	2.95926	0.00308383	0.0175022	N
chr14_104433046_104436958	5.39337	-6.03752	2.0404	-2.95899	0.00308646	0.0175031	Y
chr1_36814371_36823872	12.1766	-3.64917	1.23449	-2.956	0.00311653	0.0176271	N
chr10_28223939_28225809	6.20485	-6.23977	2.11094	-2.95592	0.00311733	0.0176271	Y
chr12_20766377_20774345	5.57474	-6.08524	2.05872	-2.95583	0.00311828	0.0176271	Y
chr6_7845373_7862731	5.46663	-6.0571	2.04892	-2.95624	0.00311413	0.0176271	Y
chr7_76240771_76247617	7.31016	5.66326	1.91636	2.95521	0.00312453	0.0176484	N
chr7_90355881_90419967	5.38804	-6.03613	2.04292	-2.95466	0.00313015	0.017666	Y
chr12_64803742_64810534	6.12133	-6.21975	2.10567	-2.95381	0.00313881	0.0177008	Y
chr1_235582732_235597595	5.53408	-6.07437	2.05672	-2.95343	0.00314265	0.0177039	Y
chr4_114452372_114469885	5.7489	-6.12967	2.07556	-2.95326	0.00314436	0.0177039	Y
chr7_103828699_103844682	34.3343	-1.67282	0.566614	-2.95232	0.003154	0.0177441	N
chr17_7351898_7352107	5.18536	6.54364	2.21741	2.95103	0.00316715	0.0177898	Y
chrX_130498723_130503026	5.42163	-6.04488	2.04828	-2.95121	0.00316537	0.0177898	Y
chr19_37696857_37698156	5.38035	-6.03412	2.04529	-2.95025	0.00317521	0.0178209	Y
chr18_8244056_8253412	6.79572	-6.24584	2.11724	-2.94999	0.00317781	0.0178214	Y
chr7_102106264_102106717	58.7164	1.14693	0.389053	2.948	0.00319833	0.0179177	N
chr8_26439485_26492416	8.34851	-5.84176	1.98171	-2.94784	0.00320005	0.0179177	Y
chr13_114164553_114188555	5.63028	-6.09922	2.06951	-2.94718	0.00320691	0.017942	N
chr14_74203701_74204000	5.43478	-6.04829	2.05274	-2.94645	0.00321448	0.0179701	Y
chr20_7976673_7990962	69.3428	-0.904356	0.307049	-2.94532	0.00322623	0.0180216	N
chr11_28250418_28252532	15.3045	-3.28564	1.11587	-2.94446	0.00323521	0.0180575	N
chr12_109212025_109217137	31.1723	-1.92144	0.652878	-2.94303	0.00325015	0.0181266	N
chr3_47210659_47215753	6.74974	-5.88344	2.00312	-2.93713	0.00331261	0.0184604	Y
chr15_67984817_68040939	6.98616	-6.02599	2.05242	-2.93604	0.00332434	0.0184822	Y
chr6_83667031_83754378	28.9124	2.07728	0.707506	2.93605	0.00332418	0.0184822	Y
chrX_6624384_6685752	5.33561	-6.02176	2.0507	-2.93644	0.00332001	0.0184822	Y
chr10_7262373_7318951	5.29518	-6.01106	2.04797	-2.93513	0.00333407	0.0185217	Y
chr5_78324256_78329231	5.5332	-6.0747	2.07078	-2.93354	0.00335124	0.0186026	Y
chr17_57161363_57165768	5.33995	-6.02291	2.05332	-2.93325	0.0033543	0.0186049	Y
chr2_18825436_18869594	7.34204	-5.77367	1.96922	-2.93195	0.0033684	0.0186685	N
chr21_16386665_16415891	5.22539	-5.99177	2.04397	-2.93144	0.00337395	0.0186846	Y
chr19_48229069_48229481	5.2275	-5.99234	2.04533	-2.92977	0.00339213	0.0187706	Y
chr8_62588699_62596747	6.67125	-6.21688	2.12392	-2.92708	0.0034216	0.018919	Y
chr9_33115989_33135422	5.45125	-6.05313	2.06884	-2.92586	0.00343503	0.0189784	Y
chr20_39896103_39897723	7.07049	-6.2871	2.15047	-2.92359	0.00346019	0.0191025	Y
chr12_121220458_121222396	67.9107	-2.93669	1.00507	-2.92188	0.00347922	0.0191781	N
chr2_29124853_29137074	6.38948	5.71261	1.95512	2.92188	0.00347929	0.0191781	N
chr11_34097783_34098189	7.83587	3.99686	1.36832	2.92099	0.00348921	0.0192178	N
chr13_83637349_83676411	5.21238	-5.98826	2.05083	-2.91992	0.00350124	0.0192691	Y
chr9_126319849_126345549	5.36187	-6.02927	2.06534	-2.91926	0.00350862	0.0192947	Y
chr9_133469030_133470975	5.2461	-5.99734	2.0551	-2.91827	0.00351976	0.0193409	Y
chr18_19395577_19399607	5.36076	-6.02898	2.06621	-2.91789	0.00352407	0.0193496	Y
chr12_117467827_117468639	5.77501	6.63461	2.2773	2.91337	0.00357555	0.0196171	Y
chr2_234678177_234681224	5.14023	-5.96802	2.04911	-2.9125	0.00358548	0.0196458	Y
chr21_46540709_46554747	5.12932	-5.96503	2.04813	-2.91243	0.00358633	0.0196458	Y
chrX_131516206_131526362	5.40453	-6.04043	2.07592	-2.90976	0.00361701	0.0197985	Y
chr9_26861064_26887511	6.48223	-5.72055	1.96623	-2.9094	0.00362123	0.0198063	Y
chr1_246670356_246835919	5.1282	-5.96473	2.05067	-2.90867	0.00362966	0.0198065	Y
chr17_9757812_9760893	5.14457	-5.96921	2.05212	-2.9088	0.00362814	0.0198065	Y
chr8_135521862_135533244	7.18649	-5.77964	1.9868	-2.90901	0.00362572	0.0198065	Y
chr16_4029117_4033441	37.113	-1.31876	0.453468	-2.90816	0.00363562	0.0198202	N
chr5_137027974_137045545	5.3299	-6.02026	2.07026	-2.90798	0.00363775	0.0198202	Y
chr16_89484692_89488713	83.2822	-0.899202	0.309245	-2.90773	0.0036406	0.0198204	N
chr15_60648118_60656722	22.8368	-3.49837	1.2038	-2.9061	0.00365962	0.0198629	N
chr2_143642918_143643105	5.14792	-5.97012	2.05408	-2.90647	0.00365528	0.0198629	N
chr10_12856194_12858327	5.13254	-5.96592	2.05273	-2.90633	0.00365691	0.0198629	Y
chr12_125436944_125438757	5.8252	6.60517	2.2724	2.9067	0.00365267	0.0198629	Y
chr10_99416042_99416731	7.22582	-5.85752	2.01784	-2.90286	0.00369766	0.020054	Y
chr1_224553581_224567357	5.31898	-6.01738	2.07326	-2.90238	0.0037034	0.0200698	Y
chr5_151166164_151175136	9.73279	3.93407	1.35569	2.9019	0.00370908	0.0200852	N
chr14_61497163_61512885	19.3062	-7.78286	2.68535	-2.89827	0.00375225	0.0203034	Y
chr20_21321359_21327188	46.3392	1.33345	0.460214	2.89745	0.00376215	0.0203415	N
chr1_52956404_52975384	5.15015	-5.97073	2.06101	-2.897	0.00376753	0.020355	Y
chr10_93000241_93011197	7.02609	-5.72933	1.97991	-2.89374	0.00380688	0.0205519	Y
chr6_86267694_86284096	31.6459	-1.96543	0.679352	-2.89309	0.00381471	0.0205785	N
chr1_1158624_1159348	19.5622	2.08388	0.721435	2.88852	0.00387063	0.0208326	N
chr20_33632308_33645374	31.6418	1.38795	0.48047	2.88873	0.00386799	0.0208326	N
chr3_168027093_168031964	5.46787	-6.05741	2.09684	-2.88883	0.00386677	0.0208326	Y
chr4_123949341_124011860	5.10749	-5.95904	2.06319	-2.88826	0.00387377	0.0208336	Y
chr2_197777606_197786910	26.81	2.12625	0.736791	2.88582	0.00390389	0.0209162	N
chr4_39843568_39847500	17.0613	1.97811	0.685269	2.88662	0.00389404	0.0209162	N
chr12_8808011_8808426	5.43564	-6.04853	2.0959	-2.88588	0.00390317	0.0209162	Y
chr14_35276657_35331528	5.39535	-6.03804	2.09202	-2.88623	0.0038989	0.0209162	Y
chr16_72556452_72589225	15.4337	4.16714	1.44384	2.88614	0.00389994	0.0209162	Y
chr12_49053688_49054402	104.096	0.871129	0.302115	2.88344	0.00393358	0.0210594	N
chr6_128643184_128643455	93.1151	-0.810824	0.281261	-2.88281	0.0039414	0.0210853	N
chr20_32677322_32678408	9.17172	5.16411	1.79219	2.88146	0.00395844	0.0211133	N
chr9_33624261_33624419	5.36387	-6.02922	2.09255	-2.88128	0.00396067	0.0211133	N
chr9_95018962_95032265	106.369	0.789623	0.274037	2.88145	0.00395853	0.0211133	N
chr12_106477642_106500303	8.40566	-6.41252	2.22509	-2.88191	0.00395276	0.0211133	Y
chr12_62877950_62895478	21.9638	-7.96091	2.76304	-2.88121	0.00396154	0.0211133	Y
chrX_106331666_106332069	240.569	0.397769	0.138113	2.88004	0.0039763	0.0211442	N
chr3_6759256_6774182	4.94932	-5.91347	2.05315	-2.8802	0.00397429	0.0211442	Y
chr9_137716446_137717750	5.26592	-6.00325	2.08435	-2.88016	0.00397474	0.0211442	Y
chr3_49928630_49929271	4.68887	6.53582	2.26976	2.87952	0.00398281	0.0211629	N
chr5_111594926_111616020	7.88763	-5.64563	1.96078	-2.87927	0.00398594	0.0211637	Y
chr6_158850768_158873300	22.2968	2.68214	0.931718	2.87871	0.00399305	0.0211808	N
chr7_33388680_33427756	34.6868	-2.25509	0.783413	-2.87854	0.00399514	0.0211808	Y
chr2_110321943_110332344	6.47937	-5.71732	1.98695	-2.87743	0.00400928	0.0212377	Y
chr9_94058303_94118437	5.22775	-5.99241	2.0827	-2.87723	0.00401187	0.0212377	Y
chr11_17899755_18029623	11.8563	4.68471	1.62863	2.87648	0.00402141	0.0212669	Y
chr15_80750270_80767564	5.62468	6.56216	2.28144	2.87632	0.00402338	0.0212669	Y
chr2_62227836_62228117	19.6572	-2.793	0.971957	-2.87359	0.0040584	0.021425	N
chr1_197621365_197684204	30.867	-1.90355	0.662446	-2.87351	0.00405934	0.021425	Y
chr3_194169186_194175121	23.4786	1.5961	0.555623	2.87264	0.00407061	0.0214684	N
chr10_4872867_4932115	7.21363	6.84263	2.3827	2.8718	0.00408146	0.0215097	Y
chr3_183368084_183369064	8.85814	-5.69584	1.98373	-2.87128	0.00408813	0.0215288	Y
chr3_196817783_196846401	142.358	0.832659	0.290103	2.87022	0.00410185	0.021585	N
chr4_106640217_106650656	7.65657	-4.09117	1.4261	-2.86878	0.00412056	0.0216674	N
chr15_67956935_67995746	17.8044	-3.87577	1.35264	-2.86534	0.00416561	0.021888	Y
chr14_93730131_93730339	6.27441	-6.25592	2.18356	-2.86501	0.00416999	0.0218947	Y
chr11_11348633_11362551	8.27543	6.74323	2.35466	2.86379	0.00418611	0.0219631	N
chr5_43675613_43677908	163.343	-0.724027	0.252941	-2.86243	0.004204	0.0220407	N
chr1_78105134_78107340	17.2661	2.06913	0.723152	2.86127	0.00421951	0.0220819	N
chr3_194877178_194947585	20.4033	2.19553	0.767489	2.86067	0.00422745	0.0220819	N
chr13_103275227_103279516	13.0993	4.95925	1.73356	2.86073	0.00422661	0.0220819	Y
chr2_10931921_10933328	10.4941	-6.47653	2.26387	-2.86082	0.0042254	0.0220819	Y
chr3_11399892_11518742	5.43644	-5.6735	1.98303	-2.86103	0.0042227	0.0220819	Y
chr12_28408514_28544344	8.37167	-4.74419	1.65909	-2.85951	0.00424294	0.0221465	Y
chr8_119388021_119391939	5.05965	-5.94514	2.08019	-2.85799	0.00426338	0.0222367	Y
chr2_85595809_85598685	33.7886	1.31253	0.459439	2.8568	0.0042793	0.0223034	N
chr1_108697605_108728576	9.11494	-6.42673	2.24994	-2.85641	0.00428467	0.0223149	Y
chr13_60485869_60490383	4.87295	-5.89092	2.06379	-2.85442	0.00431154	0.0224384	N
chr22_32134373_32134897	24.3053	-2.55621	0.895751	-2.85371	0.0043212	0.0224721	Y
chr7_87593949_87607727	89.1891	0.950246	0.333225	2.85167	0.00434906	0.0226004	N
chr5_127854966_127863660	4.9177	-5.90446	2.07075	-2.85136	0.00435327	0.0226057	Y
chr5_167927596_167929110	58.5387	-1.33002	0.466878	-2.84874	0.00438924	0.0227758	Y
chr17_50679133_50850712	5.00385	-5.92955	2.08245	-2.8474	0.00440786	0.0228557	Y
chr5_50045985_50059076	8.01713	6.70368	2.3546	2.84706	0.00441249	0.022863	N
chr9_33036572_33037113	15.888	3.17357	1.11495	2.84638	0.00442192	0.0228951	N
chr15_71534988_71549054	4.76931	-5.85999	2.05993	-2.84476	0.00444448	0.0229783	Y
chr16_15577794_15609285	4.97535	-5.92085	2.08119	-2.84493	0.00444207	0.0229783	Y
chr2_63660879_63667005	71.7097	-0.961112	0.338226	-2.84162	0.00448846	0.0231887	N
chr5_138614016_138614818	67.7639	1.29672	0.456465	2.84078	0.00450032	0.0231902	N
chr8_125332327_125343033	9.67538	-3.51696	1.23807	-2.84067	0.00450184	0.0231902	N
chr1_61743192_61849037	4.75183	-5.85484	2.06084	-2.84099	0.00449734	0.0231902	Y
chr4_148827789_148834290	9.78384	-6.46965	2.27722	-2.84103	0.00449683	0.0231902	Y
chr16_1859239_1859834	10.0685	-5.57327	1.96295	-2.83924	0.00452218	0.0232202	N
chr14_31112522_31122794	7.26321	-6.26684	2.20686	-2.83971	0.00451549	0.0232202	Y
chr17_11958206_11984847	5.08247	-5.95148	2.09633	-2.839	0.00452556	0.0232202	Y
chr4_148860976_148876525	110.942	-1.09465	0.38544	-2.84001	0.00451126	0.0232202	Y
chr4_41496553_41601043	4.92414	-5.9063	2.08051	-2.83887	0.00452733	0.0232202	Y
chr7_8095063_8110761	5.08247	-5.95148	2.09633	-2.839	0.00452556	0.0232202	Y
chr11_63960550_63962092	12.3635	4.48771	1.58115	2.83826	0.00453606	0.0232481	N
chr9_107513237_107521452	6.98385	-6.22392	2.19311	-2.83794	0.00454059	0.0232545	Y
chr3_47747899_47755980	43.2945	1.03887	0.36619	2.83696	0.0045546	0.0233094	N
chr16_69820899_69833198	10.8668	4.05367	1.43013	2.83447	0.00459013	0.0234743	Y
chr22_30374431_30394846	23.8288	-2.11052	0.745157	-2.83232	0.00462112	0.0235827	N
chr10_93841077_93851701	20.5666	-7.85171	2.77204	-2.83247	0.00461897	0.0235827	Y
chr22_46493806_46505788	4.83489	-5.8799	2.07601	-2.83231	0.00462132	0.0235827	Y
chr14_45475211_45495075	4.78191	-5.77602	2.03977	-2.83171	0.00463005	0.0236103	Y
chr9_74354979_74355148	4.74204	-5.85194	2.06724	-2.83079	0.00464325	0.0236605	N
chr12_21028169_21054401	5.27983	-6.00639	2.12208	-2.83043	0.0046486	0.0236679	Y
chr3_33863447_33870461	4.67001	-5.8297	2.05979	-2.83024	0.00465138	0.0236679	Y
chr5_76745585_76785397	29.4039	-2.10627	0.744317	-2.8298	0.00465773	0.0236832	N
chr19_34942886_34955036	7.31079	-5.72301	2.02276	-2.82931	0.00466483	0.0237023	N
chr18_43702433_43704859	7.47379	6.75209	2.38742	2.82819	0.00468117	0.0237682	N
chr17_49294695_49302570	16.1231	-2.91022	1.02941	-2.82709	0.00469731	0.0238331	N
chr13_80094945_80113910	34.0606	-1.77195	0.627004	-2.82605	0.00471253	0.0238779	Y
chr22_29025540_29029962	4.90356	-5.90041	2.08788	-2.82603	0.00471289	0.0238779	Y
chr17_35343916_35348156	77.9785	1.15967	0.410487	2.8251	0.00472659	0.0239299	N
chr5_72157635_72173173	4.73881	-5.85099	2.07124	-2.82488	0.00472991	0.0239299	Y
chr3_141087463_141122873	19.8966	1.79783	0.636498	2.82457	0.00473445	0.0239358	N
chr17_80842021_80869665	110.983	0.749989	0.2656	2.82375	0.00474647	0.0239795	N
chr3_157839892_157841780	406.159	0.354362	0.125547	2.82255	0.00476436	0.0240527	N
chr4_148867768_148944564	6.99109	-5.61722	1.99034	-2.82224	0.00476899	0.024059	N
chr21_45012106_45033828	4.99185	-5.92551	2.10075	-2.82067	0.00479237	0.0241597	Y
chr3_156411809_156413814	187.07	-0.458841	0.162724	-2.81976	0.004806	0.0241823	N
chr10_60549022_60553375	4.65476	-5.82511	2.06576	-2.81984	0.00480473	0.0241823	Y
chr10_74468041_74501603	4.88696	-5.89496	2.09065	-2.81968	0.0048071	0.0241823	Y
chr12_79968646_79990438	8.14825	-6.37836	2.26535	-2.81562	0.00486836	0.0244731	Y
chr10_486811_518489	14.2899	-3.87988	1.37836	-2.81486	0.00487983	0.0245134	Y
chr19_10246412_10246963	10.625	2.98474	1.06065	2.81405	0.0048921	0.0245576	N
chr2_156666440_156669306	5.72221	5.57499	1.9818	2.8131	0.00490661	0.0246001	N
chr14_35044962_35078948	4.5903	-5.80476	2.06368	-2.81281	0.004911	0.0246001	Y
chr2_214174783_214182080	4.5903	-5.80476	2.06368	-2.81281	0.004911	0.0246001	Y
chr6_101214441_101215221	5.83811	-4.81588	1.71301	-2.81136	0.00493331	0.0246945	N
chr1_213415912_213436159	4.58373	-5.80275	2.06428	-2.81103	0.00493833	0.0247021	Y
chr13_99549742_99556960	19.017	3.97543	1.41646	2.80659	0.00500695	0.02501	N
chr11_85707869_85742653	4.87816	-5.89243	2.09935	-2.80678	0.00500394	0.02501	Y
chr4_88005272_88012981	19.6427	-7.77632	2.77147	-2.80584	0.00501852	0.0250502	Y
chr10_15838099_15889942	4.95038	-5.82702	2.07789	-2.8043	0.00504253	0.0251523	Y
chr5_170640623_170669824	4.56848	-5.79808	2.06786	-2.80391	0.00504874	0.0251655	Y
chr11_12785726_12785981	238.44	0.612138	0.218369	2.80323	0.00505939	0.0252009	N
chr12_105321751_105322472	34.0659	-1.37351	0.490602	-2.79965	0.00511581	0.0253926	N
chr18_56363598_56367823	46.2378	-1.47034	0.525127	-2.79996	0.00511083	0.0253926	N
chr8_6335115_6357450	4.48778	-5.77227	2.06137	-2.80021	0.00510697	0.0253926	N
chr1_21431610_21437876	4.86986	-5.89003	2.10382	-2.79968	0.00511541	0.0253926	Y
chrX_71681854_71708891	5.20767	-5.87893	2.09969	-2.7999	0.00511181	0.0253926	Y
chr22_47370186_47433094	16.1241	-2.6285	0.939232	-2.79856	0.00513306	0.025411	N
chr12_5269473_5281055	5.28863	-6.00875	2.14712	-2.79851	0.00513387	0.025411	Y
chr3_55038790_55052344	4.5598	-5.79541	2.07059	-2.79892	0.00512737	0.025411	Y
chr9_128305338_128348006	12.4411	-3.94852	1.41093	-2.79852	0.00513372	0.025411	Y
chr9_74838036_74842956	4.78035	-5.86324	2.09546	-2.79807	0.00514094	0.0254283	Y
chr2_98504515_98543950	9.36294	-4.54731	1.6255	-2.79749	0.0051501	0.0254412	N
chr4_154191490_154197282	11.4387	-5.07937	1.81571	-2.79745	0.00515073	0.0254412	Y
chr8_19221583_19231171	7.97524	-4.55016	1.62713	-2.79643	0.00516709	0.0255032	N
chr5_78415060_78419286	4.79969	-5.86892	2.09888	-2.79622	0.00517049	0.0255032	Y
chr9_17551148_17555080	4.49001	-5.77297	2.06515	-2.79542	0.00518326	0.0255484	Y
chr5_43292576_43297268	18.7738	-3.82332	1.36913	-2.79252	0.00522985	0.0257422	N
chr15_67873092_67893087	7.94972	-5.54889	1.987	-2.7926	0.00522864	0.0257422	Y
chr6_150092298_150094305	54.9325	1.0593	0.379377	2.79222	0.00523471	0.0257482	N
chr7_47436397_47440511	24.2439	1.38266	0.495319	2.79145	0.00524728	0.0257922	N
chr11_72695133_72700142	77.895	-0.790438	0.283299	-2.79012	0.00526886	0.0258803	N
chr3_141272699_141278837	6.54193	-4.67282	1.67511	-2.78955	0.00527813	0.0259078	N
chr7_90376996_90419967	4.50849	-5.77872	2.07203	-2.78891	0.0052885	0.0259408	Y
chr6_110988637_110991744	7.86347	-6.31726	2.26541	-2.78857	0.00529407	0.0259501	Y
chr5_179688684_179714067	15.6421	-3.34227	1.19886	-2.78787	0.00530555	0.0259602	Y
chr9_91680444_91692818	22.9123	2.2415	0.80398	2.788	0.00530343	0.0259602	Y
chrX_44870206_44879975	22.8191	-3.88278	1.39279	-2.78778	0.00530712	0.0259602	Y
chr1_227381487_227400920	21.0658	-1.6915	0.606962	-2.78682	0.00532278	0.0260009	N
chr16_983991_1004666	18.0351	8.26251	2.96483	2.78684	0.00532249	0.0260009	Y
chr20_33057853_33069011	61.5261	1.38315	0.496407	2.78633	0.00533085	0.0260223	N
chr15_31200321_31206294	6.88855	-5.547	1.99116	-2.78582	0.00533927	0.0260455	Y
chr5_87581558_87588460	4.61101	-5.81108	2.08641	-2.78521	0.00534937	0.0260768	Y
chr5_80071513_80109560	16.5913	-2.82168	1.01354	-2.78398	0.00536971	0.0261579	N
chr13_76287318_76335174	11.5605	4.56219	1.6392	2.78317	0.00538302	0.0262048	Y
chr4_169812073_169837178	5.49389	-6.06458	2.17925	-2.78287	0.00538799	0.026211	Y
chr5_78338106_78340375	4.49311	-5.77394	2.07539	-2.7821	0.00540086	0.0262555	Y
chr14_31775938_31778388	4.40919	-5.74666	2.06591	-2.78165	0.00540827	0.0262555	Y
chr4_151223777_151242520	4.50402	-5.77734	2.07685	-2.78178	0.00540613	0.0262555	Y
chr8_141889570_141935848	6.62826	-6.14412	2.20993	-2.78023	0.00543207	0.026353	Y
chr15_67893023_67956983	4.38526	-5.73904	2.06547	-2.77856	0.00546011	0.02646	Y
chr9_129154345_129184227	4.46596	-5.76544	2.07504	-2.77847	0.0054616	0.02646	Y
chr14_54875463_54878424	4.63917	-5.40996	1.94919	-2.7755	0.00551176	0.0266301	Y
chr16_56900985_56902284	4.72146	-5.84582	2.10615	-2.7756	0.00551003	0.0266301	Y
chr20_34446224_34459751	4.80291	-5.86987	2.11455	-2.77594	0.00550424	0.0266301	Y
chr3_182804481_182810333	8.58915	-6.33182	2.28127	-2.77557	0.00551051	0.0266301	Y
chr12_72052410_72054207	5.01674	-5.93316	2.13832	-2.77468	0.00552553	0.0266785	Y
chr2_240111529_240274613	7.00263	6.60011	2.37959	2.77363	0.00554343	0.0266921	N
chr1_211092982_211093411	6.89118	-6.17937	2.22758	-2.77403	0.00553658	0.0266921	Y
chr22_38046159_38046732	5.77661	6.54207	2.35845	2.77388	0.00553918	0.0266921	Y
chr6_165862416_165863850	4.56079	-5.79571	2.08949	-2.77375	0.00554142	0.0266921	Y
chr20_34446224_34451322	5.65614	-5.47721	1.97533	-2.7728	0.00555758	0.0267421	N
chr11_103173822_103182762	4.41688	-5.7491	2.07501	-2.77064	0.00559458	0.0268836	Y
chrX_67494580_67518938	4.41129	-5.74733	2.07421	-2.77085	0.00559107	0.0268836	Y
chr21_17135210_17150346	4.4201	-5.75012	2.07679	-2.76876	0.00562708	0.0270214	Y
chr9_36599391_36607670	6.83523	5.64468	2.04002	2.76697	0.00565802	0.0271516	N
chr6_125366357_125379252	4.50861	-5.77877	2.08975	-2.76528	0.00568732	0.0272737	Y
chr13_95858786_95863035	18.8542	1.79535	0.649577	2.76388	0.00571191	0.02737	N
chr20_25612794_25615463	34.475	1.23077	0.445334	2.76369	0.00571512	0.02737	N
chr1_233313548_233344435	6.54254	-5.63755	2.04043	-2.76293	0.00572854	0.0273972	Y
chr21_46536848_46548488	4.71155	-5.84215	2.11437	-2.76306	0.00572618	0.0273972	Y
chr5_178965995_178967833	4.31813	-5.39736	1.95409	-2.76208	0.00574349	0.0274501	Y
chr18_55833020_55919286	21.8288	-3.39334	1.2287	-2.76174	0.00574949	0.0274603	Y
chr3_4403723_4461823	6.4801	-6.14383	2.22575	-2.76034	0.00577405	0.027559	Y
chr18_19395577_19424214	4.62081	-5.81407	2.10831	-2.7577	0.00582102	0.0277645	Y
chr3_145820542_145842016	4.32625	-5.71918	2.07436	-2.75708	0.00583203	0.0277838	Y
chr9_74817487_74846097	4.41911	-5.74981	2.08551	-2.75703	0.00583292	0.0277838	Y
chr11_65271200_65272066	4.2117	-5.68069	2.06109	-2.75615	0.00584857	0.0278397	Y
chr20_20634174_20661445	4.40497	-5.74532	2.08479	-2.75582	0.00585452	0.0278492	Y
chr6_4891947_4892613	7.26569	-6.22387	2.25903	-2.75511	0.00586731	0.0278914	Y
chr12_105385490_105389804	35.1221	1.35162	0.490729	2.75431	0.00588152	0.0279402	N
chr8_87540764_87544808	6.32142	-6.08381	2.20906	-2.75403	0.00588669	0.027946	Y
chr2_207144264_207146633	13.5484	-2.64676	0.96126	-2.75343	0.00589745	0.0279783	N
chr14_61449226_61497241	7.28636	-6.20455	2.25414	-2.75252	0.00591389	0.0280375	N
chr1_91356594_91383711	4.91325	-5.90253	2.14556	-2.75104	0.00594065	0.0281456	Y
chr12_64456697_64458999	4.58944	-5.8045	2.1105	-2.75029	0.00595427	0.0281912	Y
chr11_103173822_103194718	10.9179	-4.25781	1.5496	-2.74768	0.00600183	0.0283785	Y
chr9_74825603_74846097	4.31633	-5.71596	2.08017	-2.74783	0.00599908	0.0283785	Y
chr1_227327277_227335260	35.1003	-1.29727	0.472278	-2.74683	0.00601746	0.0284144	N
chr6_84618728_84634311	5.01465	-5.4078	1.96863	-2.74699	0.00601444	0.0284144	Y
chr2_200233328_200298237	5.42951	-5.61158	2.04315	-2.74653	0.00602291	0.0284212	Y
chr10_52220433_52350007	4.80502	-5.8705	2.13854	-2.74509	0.00604934	0.0285269	Y
chr14_31813102_31817113	7.20429	-6.18483	2.25384	-2.74412	0.00606726	0.0285924	Y
chr1_244715624_244724447	4.19645	-5.67561	2.06883	-2.7434	0.00608071	0.0286036	Y
chr15_55619729_55626205	4.41885	-5.74974	2.09561	-2.7437	0.00607511	0.0286036	Y
chr4_106370507_106377902	5.02142	-5.52689	2.01466	-2.74334	0.00608175	0.0286036	Y
chr19_34699834_34706566	19.6513	2.32989	0.849494	2.74268	0.00609403	0.0286233	N
chrX_6685548_6701543	4.39269	-5.74141	2.09331	-2.74274	0.00609291	0.0286233	Y
chr15_94899366_94928754	20.4593	-7.80851	2.84865	-2.74113	0.00612288	0.0287398	Y
chrX_22231021_22263526	4.32724	-5.7195	2.08687	-2.74071	0.00613063	0.0287571	Y
chr5_68470704_68471364	288.426	-0.533151	0.194554	-2.74037	0.00613696	0.0287678	N
chr14_99723808_99724173	7.83169	7.27527	2.65532	2.73988	0.00614615	0.0287918	Y
chr16_148143_150507	25.8225	2.52306	0.921281	2.73864	0.00616936	0.0288814	Y
chr2_26587170_26598016	30.5025	-1.86617	0.681624	-2.73783	0.00618456	0.0289334	N
chr17_60741909_60742310	8.68133	-6.28981	2.29774	-2.73739	0.00619281	0.0289529	Y
chr6_57046830_57048709	4.21815	-5.68283	2.0762	-2.73713	0.00619772	0.0289542	Y
chrX_44894176_44913200	4.29042	-5.70752	2.08536	-2.73694	0.00620127	0.0289542	Y
chr5_108219097_108295048	4.81271	-5.87275	2.14607	-2.73651	0.00620944	0.0289733	Y
chr10_1130343_1151207	35.8518	1.57609	0.57629	2.7349	0.00623996	0.029096	N
chr2_109964130_109988137	4.66864	-5.82929	2.13161	-2.73469	0.00624396	0.029096	Y
chr2_169018297_169023917	38.0396	-1.31356	0.480687	-2.73268	0.00628214	0.0292266	N
chr6_42559889_42562042	25.7184	-2.01621	0.737753	-2.73291	0.00627774	0.0292266	N
chr17_28011581_28022541	6.86967	-6.15119	2.25109	-2.73253	0.00628494	0.0292266	Y
chr6_74149932_74150168	4.21269	-5.68102	2.07917	-2.73235	0.00628849	0.0292266	Y
chr2_236945205_236957925	6.90857	-5.4448	1.99333	-2.73151	0.00630444	0.0292624	Y
chr2_72907743_72960247	6.28634	-6.07442	2.22365	-2.73173	0.00630032	0.0292624	Y
chr6_56716195_56765419	4.35798	-5.73028	2.09807	-2.73121	0.0063102	0.0292699	Y
chr1_28337458_28343750	4.40175	-5.74429	2.10377	-2.73047	0.00632433	0.0293162	Y
chr12_122332645_122341013	4.2389	-5.32208	1.94939	-2.73013	0.00633095	0.0293277	N
chr9_129102787_129148937	8.00129	-6.23784	2.2862	-2.72848	0.00636269	0.0294555	Y
chr10_96201653_96204296	4.2029	-5.67776	2.08215	-2.72687	0.00639381	0.0295803	Y
chr15_68434284_68439038	17.0652	-3.0496	1.11877	-2.72584	0.00641377	0.0296215	N
chr11_106680719_106681204	4.12344	-5.65009	2.07263	-2.72605	0.0064097	0.0296215	Y
chr9_99324975_99327765	4.14402	-5.65706	2.0754	-2.72576	0.00641528	0.0296215	Y
chr14_35331250_35331528	76.8177	-0.880581	0.32309	-2.7255	0.00642044	0.029626	N
chr9_88257742_88261333	7.33681	-5.52293	2.02669	-2.72509	0.00642832	0.0296431	Y
chrX_9469820_9520565	4.02848	-5.61652	2.06184	-2.72403	0.00644911	0.0297196	Y
chr22_19808121_19808898	8.339	6.61231	2.42781	2.72357	0.00645814	0.0297419	N
chr12_28515371_28544344	3.20831	-5.201	1.91029	-2.72262	0.00647667	0.0297982	N
chr17_26685939_26687870	4.18343	-5.67126	2.0831	-2.72251	0.00647878	0.0297982	Y
chr14_50074118_50074839	4.04373	-5.6218	2.06681	-2.72004	0.00652736	0.0300021	Y
chr1_179955304_179961356	8.67494	-6.26711	2.30452	-2.71949	0.00653831	0.030033	Y
chr5_37213661_37224842	10.6717	-4.05683	1.49206	-2.71894	0.0065491	0.0300436	Y
chr6_160205698_160209175	8.70276	4.5785	1.68387	2.71904	0.00654717	0.0300436	Y
chr9_36594625_36607670	17.0265	-2.97848	1.09559	-2.71861	0.00655559	0.0300539	N
chr5_79974746_80048075	3.93674	-5.58329	2.05448	-2.71762	0.00657537	0.0301251	N
chr5_80063752_80074655	4.19813	-5.57594	2.05292	-2.71611	0.00660545	0.0302433	Y
chr5_60768508_60790237	6.21679	-6.05651	2.23104	-2.71466	0.00663434	0.030356	Y
chr12_12992008_12999533	3.93562	-5.5829	2.05768	-2.7132	0.00666372	0.0304707	Y
chr10_28420489_28438988	4.22931	-5.68653	2.09626	-2.7127	0.00667373	0.0304968	Y
chr12_109210814_109217137	25.8118	-1.99293	0.734844	-2.71205	0.00668681	0.0304975	N
chr12_19615444_19646920	5.33457	-5.88846	2.1712	-2.71207	0.00668643	0.0304975	Y
chr17_78614243_78617610	4.36008	-5.73095	2.11292	-2.71233	0.00668115	0.0304975	Y
chr19_30476130_30477324	32.651	1.96098	0.723126	2.71181	0.00669176	0.0305005	Y
chr11_6344815_6345265	3.94988	-5.58794	2.06103	-2.71124	0.00670323	0.0305135	Y
chrX_155125286_155130251	5.65148	-5.47178	2.01816	-2.71127	0.00670265	0.0305135	Y
chr22_50563821_50566936	4.13955	-5.65556	2.08673	-2.71025	0.00672328	0.0305275	Y
chr4_115299603_115315470	3.93996	-5.58443	2.06038	-2.71039	0.00672035	0.0305275	Y
chr4_153332455_153333681	6.36066	-6.06937	2.2391	-2.71063	0.00671559	0.0305275	Y
chr7_43436413_43447330	4.13981	-5.65564	2.08677	-2.71024	0.00672355	0.0305275	Y
chr2_62100137_62107529	8.15978	6.56399	2.42268	2.70939	0.00674068	0.0305857	Y
chr1_21076216_21076468	4.28471	-5.70566	2.10765	-2.70712	0.0067869	0.0307487	Y
chr1_61553821_61743257	4.69641	-5.83831	2.15692	-2.70678	0.00679398	0.0307487	Y
chr3_4418014_4461823	4.09728	-5.64119	2.08403	-2.70687	0.00679219	0.0307487	Y
chr5_111595588_111602027	8.24076	-5.43598	2.00811	-2.70701	0.0067892	0.0307487	Y
chr17_54985829_54986238	18.5667	2.59704	0.959766	2.70591	0.00681167	0.0308091	N
chr22_24002052_24026054	3.85381	-5.55247	2.05226	-2.70553	0.00681951	0.0308249	Y
chr7_48033912_48035743	4.18008	-5.67014	2.09604	-2.70516	0.00682706	0.0308393	Y
chr17_19445706_19451446	3.95745	-5.59061	2.06686	-2.70488	0.00683286	0.0308458	Y
chr7_102039995_102047945	31.2939	-1.38953	0.513856	-2.70413	0.00684837	0.0308848	N
chr7_156549087_156619438	130.273	-1.07115	0.396221	-2.70341	0.00686328	0.0308848	N
chr1_227192695_227204751	20.8837	-2.36301	0.874053	-2.70351	0.00686107	0.0308848	Y
chr2_32142995_32181667	4.05675	-5.6263	2.08088	-2.7038	0.00685511	0.0308848	Y
chr5_170345717_170395381	20.2732	-3.80943	1.40897	-2.70369	0.00685742	0.0308848	Y
chr5_134509732_134589702	6.44418	-5.45075	2.01648	-2.7031	0.00686966	0.0308938	Y
chr22_42204879_42206295	74.1129	0.794785	0.294052	2.70287	0.00687431	0.0308951	N
chr6_166316145_166324420	4.15381	-5.66037	2.0952	-2.70159	0.00690085	0.0309948	Y
chr12_123983091_123984083	3.8517	-5.5517	2.05524	-2.70124	0.00690816	0.0310079	Y
chr21_42609440_42622828	15.029	5.04706	1.86872	2.70081	0.00691712	0.0310285	N
chr14_76330010_76368567	6.01366	-5.48908	2.03271	-2.70037	0.00692616	0.0310297	Y
chr2_69297779_69304620	3.86038	-5.55484	2.05706	-2.70038	0.00692595	0.0310297	Y
chr5_167986037_167993271	7.7542	-4.69478	1.73914	-2.69948	0.0069448	0.0310936	N
chr9_130285958_130294057	53.4859	-4.58071	1.69716	-2.69904	0.00695392	0.0311147	Y
chr1_22188250_22188608	14.1171	2.74352	1.01679	2.69823	0.006971	0.0311259	N
chr1_23397718_23398690	58.1171	1.12624	0.417462	2.69784	0.00697916	0.0311259	N
chr1_51926763_51930998	54.4395	-0.929188	0.344545	-2.69686	0.00699971	0.0311259	N
chr10_7839010_7844817	35.3144	1.14659	0.425017	2.69775	0.00698089	0.0311259	N
chr7_38247048_38259261	15.0373	3.13825	1.163	2.69842	0.00696696	0.0311259	N
chr1_179271812_179276351	3.85157	-5.55166	2.05818	-2.69737	0.00698899	0.0311259	Y
chr1_227381487_227387353	11.9436	-3.7876	1.40369	-2.69833	0.00696888	0.0311259	Y
chr5_24060288_24062089	3.85716	-5.55368	2.05934	-2.69683	0.00700037	0.0311259	Y
chr5_37605166_37605340	3.85157	-5.55166	2.05818	-2.69737	0.00698899	0.0311259	Y
chr5_78742876_78752841	4.36789	6.43376	2.38567	2.69683	0.00700021	0.0311259	Y
chr5_111594926_111643187	5.48001	-5.36448	1.98939	-2.69654	0.00700643	0.0311334	Y
chr18_12951854_12971250	7.52451	6.52435	2.41993	2.69609	0.00701584	0.0311556	N
chr2_61749746_61761038	616.719	-0.59254	0.219874	-2.69491	0.00704083	0.0311954	N
chr12_12672796_12674397	8.31717	-6.2347	2.31334	-2.69511	0.00703656	0.0311954	Y
chr13_108269565_108287727	3.95212	-5.58873	2.07353	-2.69528	0.00703302	0.0311954	Y
chr17_49091593_49133843	3.96179	-5.59215	2.07514	-2.69483	0.00704241	0.0311954	Y
chr1_220771673_220792097	3.76219	-5.51775	2.04829	-2.69383	0.0070637	0.0312701	Y
chr12_29812813_29813818	4.50328	-5.77711	2.14536	-2.69284	0.0070846	0.0313235	Y
chr12_514677_527802	3.96067	-5.59176	2.0765	-2.69288	0.00708377	0.0313235	Y
chr4_7795408_7811490	3.91603	-5.57593	2.07106	-2.69231	0.00709594	0.0313345	Y
chr5_87581561_87588460	4.63606	-5.81873	2.16118	-2.69238	0.00709431	0.0313345	Y
chr3_23250183_23258803	4.56005	-5.79546	2.15306	-2.69173	0.00710825	0.0313693	Y
chr12_4626227_4628046	10.1422	3.3187	1.23405	2.68927	0.00716091	0.031582	N
chr10_34985246_34989132	3.95955	-5.59136	2.07945	-2.68887	0.00716942	0.0315999	Y
chr3_57875768_57882659	186.368	0.60907	0.226568	2.68825	0.0071828	0.0316078	N
chr9_20715321_20770237	3.84302	-5.54856	2.06407	-2.68816	0.00718461	0.0316078	N
chr12_113758136_113759153	4.14935	-5.65887	2.10484	-2.68851	0.0071772	0.0316078	Y
chr3_11399892_11406208	26.6763	-1.29333	0.481269	-2.68734	0.00720238	0.0316462	N
chr4_30921775_30924205	4.25868	-5.69711	2.12028	-2.68695	0.00721068	0.0316462	Y
chr5_58481015_58511794	4.11042	-5.64567	2.10116	-2.68693	0.00721119	0.0316462	Y
chr6_135639657_135644462	3.86695	-5.55722	2.06782	-2.68748	0.00719939	0.0316462	Y
chr13_28830429_28835595	40.0788	-1.769	0.658541	-2.68624	0.00722609	0.0316919	N
chr12_39154649_39170103	21.4479	-7.85934	2.92623	-2.68582	0.00723512	0.0316973	Y
chr18_60015401_60017170	3.86906	-5.55798	2.06942	-2.68577	0.00723626	0.0316973	Y
chr10_7285520_7318951	3.74037	-5.50965	2.05264	-2.68417	0.00727093	0.0318098	Y
chr15_86182605_86189185	3.82442	-5.54179	2.06462	-2.68417	0.00727095	0.0318098	Y
chr13_114541042_114542823	6.2931	6.59366	2.45716	2.68345	0.00728671	0.0318591	Y
chr1_211526581_211527809	30.0559	6.31395	2.35325	2.68307	0.00729494	0.0318754	Y
chr22_50810449_50827540	3.90847	-5.57323	2.0793	-2.68034	0.00735482	0.0319379	N
chr7_98985662_98987635	7.85819	5.15218	1.92106	2.68195	0.00731942	0.0319379	N
chr9_31233745_31235417	7.40203	7.19342	2.68287	2.68124	0.00733509	0.0319379	N
chr1_84644860_84650865	8.77436	-4.48864	1.67431	-2.68088	0.00734279	0.0319379	Y
chr12_11187381_11273779	4.06121	-5.62784	2.09973	-2.68026	0.0073564	0.0319379	Y
chr12_96707099_96728643	4.59279	-5.80553	2.166	-2.6803	0.00735558	0.0319379	Y
chr3_4403723_4403938	3.67381	-5.4834	2.04518	-2.68113	0.00733744	0.0319379	Y
chr5_71579332_71609985	4.15592	-5.66109	2.11209	-2.68032	0.00735507	0.0319379	Y
chr9_33886879_33900269	4.15592	-5.66109	2.11209	-2.68032	0.00735507	0.0319379	Y
chrX_112291554_112369568	4.14204	-5.6564	2.10964	-2.68121	0.00733569	0.0319379	Y
chrX_130522991_130533678	3.74359	-5.51085	2.05617	-2.68015	0.00735883	0.0319379	Y
chr3_142455221_142481155	3.66066	-5.47842	2.04492	-2.67903	0.00738351	0.0320131	Y
chrX_67412761_67421552	8.62453	-5.42464	2.02491	-2.67896	0.00738521	0.0320131	Y
chr10_99196948_99197507	24.4365	-2.31515	0.86434	-2.67852	0.00739484	0.032029	N
chr7_50771518_50823753	3.73925	-5.50924	2.05702	-2.67826	0.00740067	0.032029	Y
chr9_132841909_132854660	3.90735	-5.57283	2.08083	-2.67818	0.00740244	0.032029	Y
chr12_90049456_90049884	6.43175	-6.06346	2.26458	-2.67752	0.007417	0.0320528	N
chr3_47702784_47719801	13.8545	1.79485	0.670302	2.67767	0.00741353	0.0320528	N
chr2_143712379_143718339	3.67815	-5.48505	2.04905	-2.67687	0.00743133	0.0320952	Y
chr1_198231705_198266370	3.83521	-5.54572	2.07205	-2.67645	0.00744074	0.0321113	Y
chr9_133333788_133333976	4.19087	-5.67374	2.12	-2.67629	0.00744414	0.0321113	Y
chr4_139135739_139153536	3.57451	-5.44398	2.03435	-2.67603	0.00745	0.0321171	Y
chr17_57886157_57895134	15.8131	-3.92825	1.46823	-2.67551	0.00746153	0.0321277	Y
chr4_139135739_139157605	3.84414	-5.54896	2.07388	-2.67565	0.00745855	0.0321277	Y
chr11_38116674_38144663	3.95869	-5.59106	2.09058	-2.67441	0.00748619	0.0321752	Y
chr12_28457559_28544344	4.06654	-5.62968	2.10501	-2.67442	0.00748593	0.0321752	Y
chr7_8043538_8047896	4.06431	-5.62891	2.10463	-2.67453	0.00748335	0.0321752	Y
chr1_245222688_245246990	3.83955	-5.5473	2.0745	-2.67404	0.00749446	0.0321912	Y
chr7_107188556_107198560	7.77344	-4.25569	1.59211	-2.67298	0.00751801	0.0322532	N
chr1_156202111_156203519	3.84959	-5.55094	2.07655	-2.67315	0.00751416	0.0322532	Y
chr1_59805630_59844509	15.5595	2.05042	0.767151	2.67277	0.00752287	0.0322545	N
chr5_137342679_137347634	7.51845	-5.37383	2.0123	-2.67048	0.00757418	0.0324549	Y
chr6_99860427_99864304	4.44948	-5.75946	2.15709	-2.67002	0.00758475	0.0324756	Y
chr8_19315937_19316153	5.21347	-5.98904	2.2432	-2.66986	0.00758819	0.0324756	Y
chr5_137342679_137354835	4.05799	-5.62673	2.1078	-2.66948	0.0075969	0.0324769	N
chr9_124794002_124802758	3.85368	-5.55242	2.07999	-2.66945	0.00759767	0.0324769	Y
chr9_102606931_102609897	3.9138	-5.57513	2.08948	-2.66818	0.00762627	0.0325795	Y
chr15_62871704_62881961	3.90413	-5.57167	2.08865	-2.6676	0.00763956	0.032597	Y
chrX_2326786_2343345	3.68137	-5.48627	2.05652	-2.66775	0.00763613	0.032597	Y
chr8_15517016_15531345	4.09814	-5.64148	2.11516	-2.66717	0.00764934	0.0326191	Y
chr5_140961879_140963182	34.1407	1.38333	0.518843	2.66618	0.00767179	0.0326362	N
chr6_142487365_142491558	41.275	1.34464	0.504225	2.66674	0.00765903	0.0326362	N
chr1_155377933_155385714	3.48178	-5.40607	2.02745	-2.66643	0.00766605	0.0326362	Y
chr1_98144651_98165103	4.10248	-5.64296	2.11641	-2.66628	0.00766948	0.0326362	Y
chr9_97555047_97563284	3.97158	-5.59561	2.09891	-2.66597	0.00767676	0.0326378	Y
chr10_86130770_86133571	3.4752	-5.40346	2.02858	-2.66367	0.00772935	0.0328012	Y
chr12_106477642_106480663	3.96415	-5.59298	2.09988	-2.66348	0.00773373	0.0328012	Y
chr3_196921296_197024655	3.68472	-5.48753	2.0602	-2.66359	0.00773106	0.0328012	Y
chr4_95539155_95561601	4.16917	-5.66646	2.12729	-2.6637	0.00772859	0.0328012	Y
chr4_103644028_103647840	3.77186	-5.52134	2.07335	-2.66301	0.00774458	0.0328276	Y
chr11_85722073_85742653	6.63854	-6.06829	2.27908	-2.6626	0.00775387	0.0328473	Y
chr7_140055468_140058585	58.4609	-0.896455	0.33688	-2.66105	0.00778965	0.0329408	N
chr17_19445706_19452990	4.27814	-5.70349	2.14352	-2.66081	0.00779534	0.0329408	Y
chr19_48922491_48923071	3.57116	-5.44268	2.04563	-2.66064	0.0077992	0.0329408	Y
chr6_136472298_136476896	3.57116	-5.44268	2.04563	-2.66064	0.0077992	0.0329408	Y
chr9_102866780_102888831	5.69786	-5.48665	2.06173	-2.6612	0.00778637	0.0329408	Y
chr13_43986052_43987124	4.92501	-5.90652	2.22056	-2.65992	0.00781597	0.032992	Y
chr18_18963471_18983955	3.66822	-5.48129	2.06132	-2.65912	0.00783459	0.033034	Y
chr7_35903162_35913385	3.48388	-5.40692	2.03337	-2.65909	0.00783527	0.033034	Y
chr14_39815108_39818181	4.9218	-5.90503	2.22178	-2.6578	0.00786536	0.0331018	Y
chr2_184181483_184198937	13.0879	-4.65253	1.75027	-2.65817	0.00785651	0.0331018	Y
chr6_20649524_20781496	3.67914	-5.48543	2.06383	-2.65789	0.00786317	0.0331018	Y
chr11_27412641_27434407	3.55603	-5.43678	2.04608	-2.65717	0.00788003	0.0331439	Y
chr9_99589362_99607298	5.80732	-5.94389	2.23739	-2.65662	0.00789282	0.033178	N
chr10_69797850_69826974	3.46653	-5.39999	2.03371	-2.65524	0.0079251	0.0332939	Y
chr19_39408364_39409453	33.252	1.52789	0.575571	2.65457	0.00794103	0.0333213	N
chr3_4418014_4461830	3.48401	-5.40696	2.03678	-2.65466	0.00793889	0.0333213	Y
chr20_47570093_47580435	23.798	1.90905	0.719247	2.65423	0.00794905	0.0333352	N
chr2_9985349_9994550	4.23216	-5.68749	2.14349	-2.65338	0.0079691	0.0333797	Y
chr3_29781211_29804480	3.63896	-5.47014	2.06156	-2.6534	0.00796853	0.0333797	Y
chr4_169812073_169825057	3.48822	-5.40864	2.03949	-2.65196	0.0080026	0.0335002	N
chr14_51259430_51288795	8.42914	-5.24553	1.97898	-2.65062	0.00803443	0.033574	N
chr10_69902697_69918384	3.37814	-5.36268	2.0229	-2.65099	0.00802571	0.033574	Y
chr22_29025540_29025818	3.38471	-5.36537	2.02416	-2.65067	0.00803334	0.033574	Y
chr11_28311753_28318478	3.30066	-5.32896	2.01203	-2.64855	0.00808374	0.0336019	N
chr12_122218778_122219098	22.8367	-2.30007	0.868135	-2.64944	0.00806252	0.0336019	N
chr12_518534_527802	43.9067	-1.01743	0.384145	-2.64855	0.00808381	0.0336019	N
chr7_156549087_156619471	4.45059	-5.20347	1.96437	-2.64892	0.00807487	0.0336019	N
chr10_114799784_114849299	3.2952	-5.32668	2.01037	-2.6496	0.00805878	0.0336019	Y
chr5_80908381_80946158	3.59521	-5.45201	2.0583	-2.64879	0.00807811	0.0336019	Y
chr6_165792683_165806285	3.30066	-5.32896	2.01203	-2.64855	0.00808374	0.0336019	Y
chr6_17675136_17676001	13.2366	-3.97645	1.50062	-2.64987	0.00805232	0.0336019	Y
chr7_50737419_50742355	5.50489	-5.88331	2.22111	-2.64882	0.00807741	0.0336019	Y
chr5_344008_376831	10.8941	4.77372	1.80255	2.64832	0.00808925	0.0336048	Y
chr12_105303433_105322472	3.40207	-5.37246	2.02907	-2.64775	0.00810305	0.0336424	Y
chr8_42914235_42919358	72.9208	-0.737882	0.27879	-2.64673	0.00812751	0.0336452	N
chr10_12802947_12811798	3.39996	-5.3716	2.02909	-2.64729	0.00811386	0.0336452	Y
chr15_49319562_49320879	6.72377	-6.06602	2.29143	-2.64726	0.00811462	0.0336452	Y
chr17_76187051_76188866	9.9659	4.41577	1.6683	2.64687	0.00812399	0.0336452	Y
chr6_3737313_3738382	4.50326	-5.77783	2.18279	-2.647	0.00812101	0.0336452	Y
chr9_20448121_20456784	16.508	-4.02815	1.52205	-2.64653	0.00813222	0.0336452	Y
chrX_135095117_135098917	27.5382	-1.4268	0.539237	-2.64596	0.00814593	0.0336597	N
chr22_28943662_28946139	3.7219	-5.50274	2.07981	-2.64579	0.00814999	0.0336597	Y
chr4_89396992_89400658	3.86236	-5.55557	2.09962	-2.64599	0.00814529	0.0336597	Y
chr17_27248706_27254081	5.49648	-5.3354	2.01731	-2.64481	0.00817372	0.033738	N
chr10_15317854_15326104	7.91852	-5.34073	2.02037	-2.64344	0.00820671	0.0337954	N
chr9_20758089_20778767	3.20682	-5.28739	2.00015	-2.64349	0.00820557	0.0337954	N
chr14_104624092_104633385	3.50025	-5.41342	2.04787	-2.64345	0.0082067	0.0337954	Y
chr6_5771524_5775549	3.50025	-5.41342	2.04787	-2.64345	0.0082067	0.0337954	Y
chr15_56243574_56258744	22.051	-7.88551	2.9838	-2.64278	0.0082229	0.0338228	Y
chr9_74823141_74828907	3.29731	-5.32756	2.01579	-2.64292	0.00821952	0.0338228	Y
chr7_91948644_91957214	11.5755	-3.14316	1.18952	-2.64238	0.00823255	0.0338428	N
chr12_116675273_116675510	10.747	-3.05989	1.15811	-2.64215	0.00823822	0.0338465	N
chr17_59820374_59857762	4.41638	-5.62061	2.12771	-2.64162	0.008251	0.0338793	Y
chr10_27855761_27867642	3.49492	-5.4113	2.04879	-2.64122	0.0082608	0.0338803	Y
chr13_100925450_100992513	4.15034	-5.65922	2.14256	-2.64133	0.00825809	0.0338803	Y
chr19_49834874_49835577	6.09063	-5.41162	2.04994	-2.63989	0.00829328	0.0339697	Y
chr3_23996028_23996294	3.56024	-5.43842	2.06019	-2.63977	0.00829619	0.0339697	Y
chr4_123900387_123978443	5.89843	-5.96438	2.25946	-2.63974	0.00829699	0.0339697	Y
chr13_36822743_36828280	3.40542	-5.37383	2.03738	-2.63762	0.00834905	0.0341631	Y
chr10_12160748_12162266	3.30165	-5.32938	2.02111	-2.63686	0.00836786	0.0341957	N
chr2_227574201_227600966	3.30165	-5.32938	2.02111	-2.63686	0.00836786	0.0341957	N
chr12_57463017_57466695	7.09561	6.46372	2.45153	2.63661	0.00837387	0.0341957	Y
chr12_6442235_6443410	12.911	-3.86343	1.46536	-2.63651	0.00837633	0.0341957	Y
chr5_37351292_37358253	3.45673	-5.39606	2.04701	-2.63607	0.00838723	0.0342205	Y
chr8_128152989_128161917	3.11409	-5.24508	1.99035	-2.63526	0.0084074	0.0342239	N
chr17_2075952_2076153	3.49802	-5.41254	2.05353	-2.63572	0.00839578	0.0342239	Y
chr17_29061915_29111910	3.71966	-5.5019	2.08775	-2.63533	0.00840562	0.0342239	Y
chr9_130931331_130943078	3.29744	-5.32761	2.02146	-2.63552	0.00840081	0.0342239	Y
chr12_110974729_110989773	3.85183	-5.55175	2.10694	-2.63498	0.00841434	0.0342325	Y
chr17_54921380_54925426	3.84693	-5.44021	2.06497	-2.63452	0.00842566	0.0342392	N
chr1_32495899_32498935	3.46752	-5.40038	2.04984	-2.63454	0.00842521	0.0342392	Y
chr4_141868808_141889027	3.19913	-5.28408	2.00685	-2.63302	0.00846297	0.0342582	N
chr6_159026299_159029782	29.3172	1.74702	0.663553	2.63283	0.00846765	0.0342582	N
chr1_246490503_246518396	5.441	-5.85901	2.22526	-2.63296	0.00846449	0.0342582	Y
chr1_51032749_51050483	3.88654	-5.5643	2.11355	-2.63267	0.00847154	0.0342582	Y
chr10_64148155_64159552	4.05043	-5.62413	2.13541	-2.63375	0.00844477	0.0342582	Y
chr15_36983886_37002162	6.17476	-5.29719	2.01217	-2.63258	0.00847386	0.0342582	Y
chr2_219498828_219499353	3.39674	-5.37029	2.03897	-2.63383	0.00844282	0.0342582	Y
chr9_114337014_114348445	3.46988	-5.40132	2.05141	-2.63298	0.00846405	0.0342582	Y
chrX_2184781_2343345	3.46988	-5.40132	2.05141	-2.63298	0.00846405	0.0342582	Y
chr2_36615115_36623930	4.97087	-5.31247	2.01827	-2.63218	0.00848377	0.0342592	N
chrX_147013944_147014282	8.36881	-5.17613	1.96639	-2.6323	0.0084808	0.0342592	N
chr14_103915256_103923549	3.27995	-5.32026	2.02142	-2.63195	0.00848969	0.0342635	N
chr6_158994452_159029782	8.72684	4.55058	1.72919	2.63163	0.00849769	0.0342763	Y
chr14_97299804_97327072	3.36723	-5.3582	2.03645	-2.63115	0.00850975	0.0342859	N
chr15_56434976_56436681	6.02328	-5.99891	2.27992	-2.63119	0.00850854	0.0342859	Y
chr18_1626240_1649794	3.58963	-5.44986	2.07162	-2.63072	0.00852046	0.03429	Y
chr4_89052213_89061166	3.36946	-5.35912	2.03708	-2.63078	0.00851884	0.03429	Y
chr10_126799559_126811437	93.53	-0.816608	0.310574	-2.62935	0.00855483	0.0344036	N
chr7_23435746_23458443	3.48599	-5.40776	2.0568	-2.62921	0.00855841	0.0344036	Y
chr12_110983685_110989773	5.37033	-5.87086	2.23366	-2.62836	0.00857973	0.0344112	N
chr7_87369107_87370895	3.11074	-5.2436	1.99496	-2.62843	0.00857804	0.0344112	N
chrX_44833911_44879975	3.11074	-5.2436	1.99496	-2.62843	0.00857804	0.0344112	N
chr12_51442817_51450285	4.13831	-5.65515	2.15152	-2.62844	0.00857773	0.0344112	Y
chr13_102047534_102051516	3.62917	-5.46638	2.08039	-2.62757	0.00859962	0.0344381	Y
chr2_240061380_240085619	17.9643	3.98877	1.51787	2.62788	0.00859176	0.0344381	Y
chr8_128152989_128186609	3.38694	-5.36628	2.04234	-2.62752	0.00860101	0.0344381	Y
chr11_13009949_13048585	2.92528	-5.15499	1.96429	-2.62436	0.00868118	0.034477	N
chr12_133084739_133124618	6.43466	-5.34352	2.03492	-2.62592	0.00864161	0.034477	N
chr14_37709638_37717112	3.30053	-5.32892	2.02976	-2.62539	0.00865506	0.034477	N
chr15_62966026_62978995	3.01367	-5.198	1.97983	-2.62548	0.00865263	0.034477	N
chr15_71174814_71175247	2.84346	-5.11381	1.94881	-2.62407	0.0086886	0.034477	N
chr16_7929541_7944397	3.21326	-5.29017	2.01446	-2.6261	0.00863691	0.034477	N
chr19_53887125_53888280	2.84346	-5.11381	1.94881	-2.62407	0.0086886	0.034477	N
chr2_29375551_29390406	2.84235	-5.11328	1.94836	-2.62441	0.00867999	0.034477	N
chr3_47960209_47969840	3.1271	-5.25083	2.00048	-2.62478	0.00867045	0.034477	N
chr6_58246062_58256569	3.01801	-5.19998	1.97981	-2.62651	0.00862666	0.034477	N
chr8_71126138_71209035	3.2078	-5.28782	2.01496	-2.62428	0.00868315	0.034477	N
chr1_144595835_144596473	3.12822	-5.25132	2.00086	-2.62454	0.00867667	0.034477	NA
chr15_76580187_76588078	3.38347	-5.36487	2.04344	-2.62541	0.00865449	0.034477	Y
chr2_228352333_228356356	3.78303	-5.52546	2.1046	-2.62542	0.00865429	0.034477	Y
chr6_165862416_165868183	3.77397	-5.52212	2.10277	-2.62612	0.00863642	0.034477	Y
chr8_15508206_15519805	3.91591	-5.57587	2.12395	-2.62523	0.00865905	0.034477	Y
chr1_53326403_53333449	2.74962	-5.06545	1.93074	-2.62358	0.00870107	0.0344878	N
chr12_111923069_111924628	2.74962	-5.06545	1.93074	-2.62358	0.00870107	0.0344878	N
chr15_32498465_32500399	2.92962	-5.15702	1.96596	-2.62316	0.00871174	0.0345108	N
chr13_36857606_36869994	2.83912	-5.11173	1.94938	-2.62224	0.00873547	0.0345362	N
chr13_88099351_88163725	3.21872	-5.29251	2.01839	-2.62215	0.00873767	0.0345362	N
chr6_304628_348841	2.74416	-5.06275	1.93073	-2.62219	0.00873669	0.0345362	N
chr9_123407003_123421853	3.21872	-5.29251	2.01839	-2.62215	0.00873767	0.0345362	N
chr3_12353879_12434251	6.51778	-6.03117	2.30054	-2.62162	0.00875118	0.034551	N
chr16_70497072_70499079	14.3094	4.78768	1.82613	2.62176	0.00874763	0.034551	Y
chr5_37238959_37243221	3.41075	-5.37601	2.05091	-2.62128	0.00876011	0.0345668	Y
chr5_37342651_37358253	3.6955	-5.49163	2.09517	-2.62109	0.00876493	0.0345668	Y
chr1_151214599_151215043	5.20351	-5.3272	2.03295	-2.62043	0.0087819	0.0345983	N
chr1_54254806_54262817	3.03549	-5.20791	1.98767	-2.62011	0.00879021	0.0345983	N
chr6_64088931_64092461	2.94053	-5.16212	1.97013	-2.6202	0.00878787	0.0345983	N
chr15_76566753_76578822	3.27561	-5.31843	2.02992	-2.62002	0.00879245	0.0345983	Y
chr9_80537077_80567347	3.31913	-5.3367	2.03739	-2.61938	0.0088089	0.0346438	N
chr9_123593609_123595734	5.00614	-5.78427	2.20884	-2.61869	0.00882684	0.0346951	Y
chr1_70758071_70781249	26.6519	-2.2287	0.851253	-2.61814	0.00884112	0.0347071	N
chr2_215609791_215646233	5.14067	-5.29582	2.02298	-2.61782	0.00884924	0.0347071	N
chr4_79158664_79166479	6.92011	6.32702	2.41643	2.61833	0.00883604	0.0347071	Y
chr7_50771518_50773020	7.00042	-6.11313	2.33521	-2.61781	0.00884951	0.0347071	Y
chr18_45391430_45423180	38.9079	-1.0689	0.408387	-2.61738	0.00886078	0.0347321	N
chr2_105990016_106002997	6.61101	-6.06119	2.31622	-2.61685	0.00887458	0.034767	Y
chr1_42094420_42094618	3.02669	-5.20392	1.98932	-2.61593	0.00889837	0.0347846	N
chr17_11984673_12016677	3.02669	-5.20392	1.98932	-2.61593	0.00889837	0.0347846	N
chr12_123262038_123265877	3.7121	-5.49905	2.10207	-2.61601	0.00889634	0.0347846	Y
chr7_17908030_17933057	5.79741	-5.35196	2.04592	-2.61592	0.00889874	0.0347846	Y
chr12_101413812_101442179	2.74305	-5.0622	1.93549	-2.61546	0.00891081	0.0347909	N
chr4_141330991_141334241	2.92416	-5.15447	1.9709	-2.61529	0.00891509	0.0347909	N
chr10_28023385_28024303	3.57575	-5.44446	2.0816	-2.61552	0.00890912	0.0347909	Y
chr10_52100147_52104105	3.21214	-5.28969	2.02308	-2.61467	0.00893131	0.0348351	N
chr14_31605737_31626092	2.7464	-5.06385	1.93693	-2.61437	0.00893933	0.0348472	N
chr3_156638364_156660503	3.12487	-5.24985	2.00847	-2.61385	0.00895277	0.0348804	N
chr5_37115062_37120442	3.2176	-5.29204	2.02477	-2.61364	0.00895828	0.0348826	N
chr21_38792601_38845182	86.0949	-0.725308	0.277583	-2.61294	0.00897658	0.0348963	N
chr9_33971649_33973235	111.822	0.677911	0.259425	2.61313	0.00897181	0.0348963	N
chr3_119666115_119812440	3.88976	-5.56547	2.12982	-2.61312	0.00897194	0.0348963	Y
chr1_22047529_22048257	5.93835	-5.32392	2.03874	-2.61138	0.00901787	0.0349007	N
chr12_122716677_122717515	2.74739	-5.06435	1.93929	-2.61145	0.00901595	0.0349007	N
chr2_55812187_55816092	3.13256	-5.25324	2.01067	-2.61268	0.00898352	0.0349007	N
chr6_52935855_52941341	3.13144	-5.25275	2.01161	-2.61122	0.00902206	0.0349007	N
chr9_115336337_115337531	29.878	-1.5631	0.598472	-2.61182	0.00900619	0.0349007	N
chr10_52066604_52071175	3.60612	-5.45625	2.08868	-2.6123	0.00899358	0.0349007	Y
chr2_38349127_38358756	3.22752	-5.29629	2.02782	-2.61181	0.00900632	0.0349007	Y
chr3_171944661_171969331	7.75033	-6.12377	2.34469	-2.61177	0.00900755	0.0349007	Y
chr5_32121601_32143986	3.56781	-5.44137	2.08381	-2.61126	0.00902092	0.0349007	Y
chr4_7840251_7845077	24.7104	-8.01481	3.07016	-2.61055	0.00903959	0.0349495	Y
chr13_73467922_73505405	3.03872	-5.20938	1.9957	-2.61031	0.00904614	0.0349557	N
chr12_82780582_82796909	3.97293	-5.59707	2.14452	-2.60994	0.00905573	0.0349737	Y
chr17_8455364_8480656	2.94599	-5.16466	1.97916	-2.60953	0.0090667	0.034997	N
chr12_102107868_102114032	3.85294	-5.55215	2.12782	-2.60932	0.00907232	0.0349996	Y
chr11_66982811_66986874	7.28094	-5.24652	2.01144	-2.60834	0.00909812	0.0350609	N
chr17_43111303_43268537	3.12178	-5.24848	2.01237	-2.6081	0.00910457	0.0350609	N
chr19_21302890_21303163	2.7583	-5.06975	1.94394	-2.60797	0.00910801	0.0350609	N
chr4_54280782_54294350	4.55156	-5.1601	1.97851	-2.60807	0.00910543	0.0350609	N
chr1_227381487_227504947	3.13033	-5.25226	2.01519	-2.60633	0.00915175	0.0351903	N
chr1_44750507_44785416	46.7527	-1.27602	0.489794	-2.60523	0.00918138	0.0351903	N
chr12_112667502_112669519	2.8457	-5.11489	1.9626	-2.60618	0.00915572	0.0351903	N
chr12_63083479_63114069	3.22864	-5.29677	2.03301	-2.60539	0.00917707	0.0351903	N
chr19_12923897_12924379	55.5184	0.9214	0.353652	2.60538	0.00917715	0.0351903	N
chr3_195605124_195615477	12.9153	3.94902	1.51579	2.60526	0.00918054	0.0351903	N
chr5_127782174_127855061	2.94388	-5.16368	1.98192	-2.60539	0.00917684	0.0351903	N
chr5_80021272_80037367	4.6675	-5.15197	1.97748	-2.60532	0.00917886	0.0351903	N
chr7_33303902_33313568	3.4162	-5.37823	2.06484	-2.60467	0.00919631	0.0352285	Y
chr9_13247634_13250371	3.03103	-5.2059	1.99895	-2.60431	0.00920591	0.0352462	N
chr9_125627628_125639862	3.5134	-5.41865	2.08118	-2.60364	0.00922384	0.0352957	Y
chr5_65307877_65324171	3.20037	-5.28461	2.02984	-2.60346	0.0092289	0.0352961	N
chr1_180971742_180974599	51.1659	0.849429	0.326446	2.60205	0.00926681	0.0353647	N
chr12_118456877_118460164	2.75173	-5.0665	1.94696	-2.60227	0.00926095	0.0353647	N
chr12_20769164_20787990	2.75173	-5.0665	1.94696	-2.60227	0.00926095	0.0353647	N
chr14_92562437_92563182	3.71743	-5.50105	2.114	-2.6022	0.00926288	0.0353647	Y
chrX_10058811_10066619	3.21648	-5.29156	2.03407	-2.60146	0.00928271	0.0354063	N
chr2_230633332_230636348	32.1409	2.03261	0.781395	2.60126	0.00928812	0.0354078	Y
chr5_170308810_170323119	3.11198	-5.24415	2.01684	-2.60018	0.00931747	0.0354815	N
chr9_128419930_128434922	94.5595	-0.807395	0.310501	-2.6003	0.00931427	0.0354815	N
chr10_6875605_6880164	3.22542	-5.29539	2.03679	-2.59987	0.00932592	0.0354946	N
chr2_72922129_72958374	2.76165	-5.07141	1.95114	-2.5992	0.00934408	0.0355256	N
chr3_179418796_179426745	3.10107	-5.2393	2.01563	-2.59934	0.0093402	0.0355256	N
chr2_19844520_19874103	3.12723	-5.25089	2.02086	-2.59835	0.00936728	0.0355947	N
chr14_81362062_81366373	16.1926	2.38436	0.917786	2.59794	0.00937845	0.0356093	N
chr15_94927251_94945248	3.5067	-5.416	2.08481	-2.59784	0.00938118	0.0356093	Y
chr4_170501993_170511960	38.1908	1.20953	0.465815	2.59658	0.00941566	0.0356828	N
chr8_28827560_28837673	3.13591	-5.25472	2.02367	-2.59663	0.00941442	0.0356828	N
chr1_116576379_116580009	3.56595	-5.44064	2.09502	-2.59694	0.00940577	0.0356828	Y
chr11_10019813_10024236	3.21128	-5.28931	2.03761	-2.59584	0.0094359	0.0357404	N
chr1_185183639_185200840	3.91045	-5.57391	2.14742	-2.59563	0.00944188	0.0357439	N
chr2_69585461_69597240	2.82499	-5.1049	1.96766	-2.5944	0.00947572	0.0358187	N
chr14_62187097_62188541	3.36078	-5.35552	2.0643	-2.59436	0.00947681	0.0358187	Y
chr5_36953720_36962376	3.42067	-5.38005	2.0735	-2.59467	0.00946817	0.0358187	Y
chr2_212483902_212495319	3.04417	-5.21186	2.00932	-2.59384	0.00949102	0.0358401	N
chr9_73941876_73944193	3.94194	-5.58514	2.15328	-2.59378	0.0094926	0.0358401	Y
chr2_61406116_61413632	3.52987	-5.42649	2.09245	-2.59336	0.00950427	0.0358651	Y
chr14_102506573_102507010	75.3242	-1.07457	0.414428	-2.59289	0.00951743	0.0358765	N
chr3_183584413_183585848	2.9352	-5.15963	1.98988	-2.59293	0.00951615	0.0358765	N
chr1_235643370_235658138	38.1696	-1.24693	0.481457	-2.5899	0.00960034	0.035966	N
chr1_246899277_246907427	3.2647	-5.3138	2.05052	-2.59144	0.00955744	0.035966	N
chr11_76687333_76709865	2.91003	-5.14782	1.98627	-2.5917	0.00955024	0.035966	N
chr11_77823696_77832220	14.2649	2.71758	1.04884	2.59103	0.00956878	0.035966	N
chr14_50647290_50655418	2.94921	-5.16618	1.99505	-2.5895	0.00961164	0.035966	N
chr14_70477471_70490164	2.94921	-5.16618	1.99505	-2.5895	0.00961164	0.035966	N
chr19_14854232_14854596	8.20434	6.21809	2.40146	2.58929	0.00961735	0.035966	N
chr3_172003716_172028671	3.2983	-5.32798	2.05747	-2.58958	0.00960922	0.035966	N
chr5_78399987_78419286	2.94264	-5.16311	1.99226	-2.59158	0.00955362	0.035966	N
chr9_74810420_74817658	2.94921	-5.16618	1.99505	-2.5895	0.00961164	0.035966	N
chrX_2129531_2139270	3.11284	-5.24454	2.02435	-2.59073	0.00957733	0.035966	N
chr1_23356962_23385660	3.47756	-5.40438	2.08613	-2.59062	0.0095802	0.035966	Y
chr19_49348627_49355583	7.20232	6.22464	2.40306	2.59029	0.00958941	0.035966	Y
chr5_10213603_10227759	5.80141	-5.94664	2.29604	-2.58996	0.00959877	0.035966	Y
chr8_25126361_25136181	4.89633	-5.39519	2.08356	-2.58941	0.00961415	0.035966	Y
chr1_198222170_198233365	24.9044	-2.93729	1.13467	-2.58867	0.00963472	0.036012	Y
chr22_29439287_29442871	8.00326	6.1908	2.39184	2.5883	0.00964513	0.0360319	Y
chr12_124882665_124934413	3.54413	-5.43209	2.09887	-2.5881	0.00965068	0.0360336	Y
chr1_233482188_233490757	37.5692	-1.06137	0.410246	-2.58716	0.00967717	0.0360755	N
chr5_353845_361037	6.79169	7.06927	2.73211	2.58747	0.00966825	0.0360755	N
chr14_53539315_53570574	3.76628	-5.51928	2.1332	-2.58733	0.00967229	0.0360755	Y
chr12_28408514_28460682	52.2024	-0.942892	0.364504	-2.58678	0.0096878	0.036089	N
chr3_81627076_81630426	3.32012	-5.33713	2.06361	-2.5863	0.00970117	0.036089	N
chr4_144449021_144449867	3.08681	-5.23295	2.0232	-2.58648	0.00969627	0.036089	N
chr12_19626182_19646920	12.1148	-4.15795	1.60757	-2.58649	0.00969594	0.036089	Y
chr14_53327059_53340944	2.81953	-5.10225	1.97357	-2.58529	0.00972968	0.0361191	N
chr7_50737419_50778687	2.90681	-5.1463	1.99058	-2.58532	0.00972877	0.0361191	N
chr9_80921230_80923499	3.27983	-5.3202	2.0576	-2.58563	0.00972008	0.0361191	N
chr9_36052262_36065621	7.79976	-6.12928	2.37078	-2.58534	0.00972826	0.0361191	Y
chr11_9597435_9598810	3.13703	-5.25522	2.03355	-2.58426	0.00975896	0.0361345	N
chr19_49407604_49409142	3.3081	-5.33209	2.06294	-2.58471	0.0097462	0.0361345	N
chr2_168869144_168921891	5.31685	-5.15906	1.99635	-2.58424	0.00975931	0.0361345	N
chr22_43222946_43231499	11.4811	-3.15831	1.22209	-2.58435	0.00975616	0.0361345	N
chr5_43675613_43704502	151.071	-0.544549	0.21071	-2.58436	0.00975609	0.0361345	N
chr4_7787921_7811490	3.31355	-5.33438	2.06447	-2.5839	0.009769	0.0361514	N
chr9_146102_164037	6.7265	6.1908	2.3963	2.58349	0.00978068	0.0361758	N
chr7_138738197_138740041	3.36735	-5.35823	2.07447	-2.58294	0.00979632	0.0362147	Y
chr16_25162875_25170279	2.73214	-5.05676	1.95813	-2.58244	0.00981046	0.036248	N
chr11_9069490_9074762	2.76152	-5.07136	1.96437	-2.58167	0.0098323	0.0362909	N
chr14_66096210_66136198	9.12821	4.67188	1.80954	2.58181	0.00982836	0.0362909	Y
chr9_136726496_136804341	2.82486	-5.10484	1.9777	-2.5812	0.00984583	0.0362957	N
chr6_57372288_57472441	2.74317	-5.06225	1.96121	-2.58118	0.00984623	0.0362957	NA
chr2_228356263_228389631	56.289	-3.93699	1.52532	-2.58109	0.00984898	0.0362957	Y
chr16_981642_1004666	7.06542	6.22693	2.41291	2.58068	0.00986064	0.0363198	N
chr1_225273246_225284941	2.91325	-5.14933	1.99631	-2.57942	0.00989652	0.036433	N
chr12_7171571_7172603	2.84334	-5.11376	1.98295	-2.57886	0.00991257	0.0364542	N
chr4_41600937_41621457	2.84334	-5.11376	1.98295	-2.57886	0.00991257	0.0364542	N
chr12_20076132_20127661	3.08358	-5.2315	2.02902	-2.57834	0.00992777	0.0364722	N
chr16_20833084_20839859	4.5326	-5.14782	1.9965	-2.57842	0.00992529	0.0364722	N
chr11_28711107_28763455	3.61392	-5.46048	2.1182	-2.57788	0.00994074	0.0365009	Y
chr10_31661947_31676727	2.94152	-5.1626	2.0034	-2.57691	0.00996873	0.0365072	N
chr12_123651202_123665757	2.94152	-5.1626	2.0034	-2.57691	0.00996873	0.0365072	N
chr3_31774749_31921322	2.99631	-5.19004	2.01411	-2.57684	0.00997084	0.0365072	N
chr6_150157221_150174296	9.23845	-5.19352	2.01498	-2.57745	0.00995317	0.0365072	N
chrX_53627078_53631795	52.1986	1.07476	0.417036	2.57713	0.00996238	0.0365072	N
chr16_521295_539000	4.22929	-5.68733	2.20717	-2.57675	0.00997338	0.0365072	Y
chr14_80944597_80997230	2.85425	-5.11901	1.98718	-2.57602	0.00999463	0.0365214	N
chr8_141285757_141301177	25.0103	2.81474	1.09272	2.5759	0.00999787	0.0365214	N
chr13_101997617_102051516	3.41942	-5.37956	2.08811	-2.57628	0.00998704	0.0365214	Y
chrX_7432923_7434331	3.87426	-5.55989	2.1584	-2.57594	0.00999684	0.0365214	Y
chr5_122868263_122893258	3.2362	-5.30003	2.05849	-2.57472	0.0100322	0.0366089	N
chr6_56535439_56569167	2.95045	-5.16676	2.00663	-2.57484	0.0100287	0.0366089	N
chr8_15480589_15531345	3.0847	-5.232	2.03268	-2.57394	0.0100548	0.0366725	N
chr12_109509417_109511337	4.76065	-5.67558	2.20517	-2.57376	0.0100601	0.036673	Y
chr5_95099212_95124562	18.7014	-3.97192	1.54339	-2.57351	0.0100672	0.0366801	Y
chr5_141843535_141847396	14.0337	4.88466	1.89862	2.57274	0.0100897	0.036743	N
chr1_53343354_53347337	2.76809	-5.07461	1.97304	-2.57198	0.0101119	0.0367861	N
chr7_90537633_90585132	2.76809	-5.07461	1.97304	-2.57198	0.0101119	0.0367861	N
chr15_67938569_67956983	5.5144	-5.27035	2.04968	-2.5713	0.0101318	0.0368397	N
chr10_74474869_74475660	53.2921	-3.6254	1.41017	-2.5709	0.0101435	0.0368441	Y
chr9_36246028_36246479	5.44458	-5.83064	2.26791	-2.57093	0.0101424	0.0368441	Y
chr2_143638914_143685310	2.75495	-5.06811	1.97236	-2.56956	0.0101827	0.0369483	N
chr2_75745182_75749613	23.3677	-3.74682	1.45825	-2.56939	0.0101878	0.0369483	N
chr6_25605040_25606501	2.75495	-5.06811	1.97236	-2.56956	0.0101827	0.0369483	N
chr10_104809464_104816721	2.90457	-5.14523	2.00358	-2.56802	0.0102282	0.0370384	N
chr12_20790034_20803534	3.13814	-5.25572	2.04653	-2.56811	0.0102254	0.0370384	N
chr17_18210205_18212255	3.03996	-5.20995	2.02907	-2.56766	0.0102387	0.0370384	N
chr11_68115315_68125315	48.9694	3.29813	1.28449	2.56766	0.0102388	0.0370384	Y
chr13_35615070_35619538	4.17439	-5.66737	2.20708	-2.56781	0.0102343	0.0370384	Y
chr10_15875629_15889942	24.9318	-5.30877	2.068	-2.5671	0.0102552	0.0370662	Y
chr8_128174167_128186609	4.76173	-5.85832	2.28212	-2.56705	0.0102569	0.0370662	Y
chr17_57767997_57851246	3.11173	-5.24404	2.04358	-2.5661	0.0102848	0.0371237	N
chr21_38792601_38794954	3.03016	-5.2055	2.02866	-2.56598	0.0102886	0.0371237	N
chr12_60098553_60098799	3.48264	-5.40642	2.10687	-2.56609	0.0102852	0.0371237	Y
chr18_13681604_13682104	138.411	0.733424	0.28589	2.5654	0.0103056	0.0371663	N
chr3_149415493_149421115	2.95355	-5.16821	2.01484	-2.56508	0.0103153	0.0371822	N
chr5_170305101_170351554	5.30018	-5.81546	2.26773	-2.56444	0.0103343	0.0372318	Y
chr1_1601103_1666274	8.1944	7.08114	2.76155	2.56419	0.0103417	0.0372397	N
chr3_33853564_33863574	3.14248	-5.25763	2.0511	-2.56332	0.0103677	0.0373144	N
chr1_243362362_243375266	2.74949	-5.0654	1.97792	-2.56097	0.010438	0.0373398	N
chr1_6007164_6022009	25.5079	-2.00385	0.782386	-2.5612	0.0104312	0.0373398	N
chr13_21436856_21442840	5.64762	-5.31925	2.07663	-2.56149	0.0104225	0.0373398	N
chr14_31792771_31795548	3.04628	-5.21283	2.03408	-2.56275	0.0103846	0.0373398	N
chr15_72837161_72855841	2.81185	-5.09851	1.98992	-2.56216	0.0104022	0.0373398	N
chr2_15743316_15747437	5.65145	-5.2305	2.04239	-2.56097	0.0104381	0.0373398	N
chr21_45499445_45500008	21.3396	2.09139	0.816524	2.56133	0.0104273	0.0373398	N
chr9_90219869_90221143	2.85971	-5.12164	1.99967	-2.56124	0.0104298	0.0373398	N
chrX_44383248_44386611	37.4269	-1.34288	0.524142	-2.56206	0.0104052	0.0373398	N
chr11_86778736_86868448	3.46231	-5.39826	2.10707	-2.56198	0.0104077	0.0373398	Y
chr17_57092971_57094785	8.73714	-4.42005	1.72547	-2.56164	0.0104179	0.0373398	Y
chr3_171451234_171453427	6.13052	-5.9228	2.31222	-2.56153	0.0104214	0.0373398	Y
chr17_15881114_15890682	3.47868	-5.40483	2.11103	-2.56029	0.0104586	0.0373944	Y
chr1_230398319_230401113	2.86529	-5.12431	2.00178	-2.55988	0.0104708	0.037397	N
chr17_44143903_44145033	19.0701	-2.89291	1.1303	-2.55943	0.0104845	0.037397	N
chr5_127782174_127800614	2.86206	-5.12277	2.00156	-2.55939	0.0104857	0.037397	N
chr5_64863340_64868113	2.86206	-5.12277	2.00156	-2.55939	0.0104857	0.037397	N
chr9_123945208_123955697	4.9901	-5.92558	2.31462	-2.56007	0.0104652	0.037397	N
chr5_137353991_137356886	4.46654	-5.11017	1.99707	-2.55883	0.0105025	0.0374379	N
chr1_55637229_55643805	4.27519	-5.70174	2.22986	-2.55699	0.0105583	0.0376179	Y
chr17_26685939_26687594	2.76586	-5.07352	1.98456	-2.5565	0.0105731	0.0376197	N
chr17_73317740_73328878	5.24649	-5.77429	2.25864	-2.55654	0.010572	0.0376197	Y
chr5_76621364_76633140	3.51872	-5.42079	2.12044	-2.55645	0.0105747	0.0376197	Y
chr5_158368702_158368987	2.73102	-5.05619	1.97827	-2.55587	0.0105924	0.0376636	N
chr7_4780469_4780654	26.2171	1.67368	0.654896	2.55564	0.0105994	0.0376695	N
chr10_77306789_77307420	6.02102	-5.15562	2.01763	-2.55528	0.0106102	0.0376892	N
chr4_102014933_102030235	2.71912	-5.05022	1.97684	-2.55469	0.0106283	0.0377183	N
chr8_17532695_17542051	2.73536	-5.05836	1.98005	-2.55466	0.0106291	0.0377183	N
chr11_38113314_38144663	2.80862	-5.09693	1.99646	-2.55299	0.0106803	0.0378381	N
chr3_50102464_50103935	144.557	0.78671	0.308168	2.55286	0.0106842	0.0378381	N
chr5_137353991_137354835	3.39425	-5.36929	2.10289	-2.55329	0.0106712	0.0378381	Y
[truncated: 5,088 more rows]

## Sheet: SW640_vs_SW480
ID	baseMean	log2FoldChange	lfcSE	stat	pvalue	padj	DE in Jiang et al., 2018 (Y=yes, N=no)
chr11_33307959_33309057	1567.75	-1.81357	0.0905291	-20.0331	2.83653e-89	1.89196e-85	Y
chr22_25771780_25777545	238.947	4.45717	0.257452	17.3127	3.77521e-67	1.25903e-63	Y
chr3_196831774_196846401	1184.34	-1.81231	0.107382	-16.8772	6.6201e-64	1.47187e-60	Y
chr13_111274563_111276626	326.611	2.57368	0.185574	13.8687	9.798e-44	1.63382e-40	Y
chr2_58449077_58459247	511.176	1.63661	0.119136	13.7373	6.06602e-43	8.09206e-40	Y
chr8_131370263_131374017	185.769	-6.80474	0.514466	-13.2268	6.14532e-40	6.83155e-37	Y
chr2_207144264_207162097	224.64	-2.24069	0.175794	-12.7461	3.27717e-37	3.12267e-34	Y
chr3_196842798_196846401	472.23	-1.80997	0.142183	-12.7299	4.03447e-37	3.36374e-34	Y
chr7_158552177_158557544	336.807	-1.89084	0.148789	-12.7082	5.32604e-37	3.94718e-34	Y
chr1_12638746_12639440	152.154	-2.94898	0.237846	-12.3987	2.65544e-35	1.77118e-32	Y
chr20_62407031_62422143	528.692	-2.38673	0.203779	-11.7123	1.10242e-31	6.68467e-29	Y
chr8_128902835_128903244	1172.62	-1.57464	0.13634	-11.5493	7.44095e-31	4.13593e-28	Y
chr11_14793483_14810788	66.7853	4.235	0.368129	11.5041	1.25765e-30	6.45273e-28	Y
chr16_69404386_69406258	196.666	2.04799	0.188968	10.8378	2.27948e-27	1.08601e-24	Y
chr2_72945232_72960247	765.624	-1.28634	0.120093	-10.7111	9.0237e-27	4.01254e-24	Y
chr11_68115315_68115711	664.055	3.76904	0.355625	10.5983	3.03285e-26	1.19872e-23	Y
chr12_116668338_116675510	318.183	-2.05989	0.194372	-10.5977	3.05522e-26	1.19872e-23	Y
chr17_57808782_57816308	329.789	-1.63581	0.155828	-10.4975	8.86717e-26	3.28578e-23	Y
chr3_98568305_98600611	394.773	-1.35346	0.1292	-10.4757	1.11664e-25	3.91998e-23	Y
chr5_21491430_21495291	148.021	2.30893	0.221134	10.4413	1.60575e-25	5.18252e-23	Y
chr6_159004986_159010814	760.312	1.33119	0.127511	10.4398	1.63168e-25	5.18252e-23	Y
chr1_247320302_247323115	381.028	2.15091	0.20657	10.4125	2.17505e-25	6.59436e-23	Y
chr6_87925621_87928449	303.137	-1.81018	0.180097	-10.0512	9.07966e-24	2.6331e-21	Y
chr12_116534474_116549317	149.81	-2.33539	0.233865	-9.98604	1.75447e-23	4.87598e-21	Y
chr7_42187825_42188067	319.602	-11.8512	1.1907	-9.95311	2.44429e-23	6.52135e-21	Y
chr13_26911704_26928017	109.558	-2.56362	0.258254	-9.92673	3.18529e-23	8.17149e-21	Y
chr4_186168448_186188309	341.741	-2.04333	0.206122	-9.91321	3.64732e-23	9.01023e-21	Y
chr16_1004357_1004666	169.543	2.36957	0.242945	9.75353	1.78162e-22	4.24408e-20	Y
chr2_9419446_9437574	65.6227	-3.32891	0.351296	-9.47608	2.64017e-21	6.07238e-19	Y
chr5_6737623_6746540	127.684	2.45129	0.259149	9.459	3.109e-21	6.91233e-19	Y
chr1_247318868_247323115	1185.94	1.007	0.106731	9.43493	3.91252e-21	8.41823e-19	N
chr17_79937060_79943483	122.632	2.5048	0.265934	9.41886	4.55993e-21	9.5046e-19	Y
chr6_159001972_159010814	380.55	1.8112	0.198496	9.12458	7.2014e-20	1.45556e-17	Y
chr7_22330794_22357656	157.962	-10.9091	1.20349	-9.06455	1.25123e-19	2.45463e-17	Y
chr1_94032836_94033408	212.492	-2.48184	0.274588	-9.03841	1.58967e-19	3.02945e-17	Y
chr10_126631026_126631876	709.936	-1.15843	0.133728	-8.66259	4.61178e-18	8.5446e-16	Y
chr13_113170754_113181798	279.331	1.87462	0.217014	8.63822	5.70971e-18	1.02929e-15	Y
chr5_137320946_137324004	1103.72	-0.754135	0.0874233	-8.62624	6.34021e-18	1.11287e-15	N
chr7_3658712_3681737	93.5065	-9.99418	1.1974	-8.34656	7.0282e-17	1.202e-14	Y
chr10_89527430_89536184	87.2188	2.24732	0.270782	8.29937	1.04665e-16	1.74528e-14	Y
chr7_24663285_24681487	65.9171	2.22622	0.27032	8.23552	1.78776e-16	2.90838e-14	Y
chr6_160819011_160831878	113.472	9.92742	1.20591	8.23228	1.83683e-16	2.91707e-14	Y
chr13_33091994_33101669	419.384	-1.06446	0.129483	-8.22083	2.02092e-16	3.13477e-14	Y
chr20_52773708_52788209	70.564	-9.74692	1.2069	-8.07601	6.6921e-16	1.01446e-13	Y
chr7_22999875_23030758	67.8506	-4.72745	0.592277	-7.98183	1.4418e-15	2.13706e-13	Y
chr2_61749746_61753656	286.96	-1.37703	0.172875	-7.96549	1.64577e-15	2.38636e-13	Y
chr7_104678573_104681470	112.56	-2.54264	0.319696	-7.95332	1.81575e-15	2.57683e-13	Y
chr17_80842021_80861354	318.471	-1.55205	0.196214	-7.90996	2.57471e-15	3.57777e-13	Y
chr14_55168780_55169298	87.5144	-9.45861	1.20167	-7.87119	3.51275e-15	4.78164e-13	Y
chr20_16506737_16509085	88.3035	2.28315	0.295121	7.73634	1.02319e-14	1.36494e-12	Y
chr11_110007388_110008139	66.5688	-2.66949	0.346597	-7.702	1.33953e-14	1.7519e-12	Y
chr7_22347958_22357656	54.5676	-9.37588	1.2212	-7.67757	1.62132e-14	2.07965e-12	Y
chr3_196817783_196846401	142.358	-2.06221	0.26887	-7.66994	1.72082e-14	2.16564e-12	Y
chr3_138289160_138291826	235.56	-2.16835	0.283062	-7.66034	1.85435e-14	2.29047e-12	Y
chr1_94360170_94367225	65.0182	-2.60399	0.349161	-7.45783	8.79587e-14	1.04765e-11	Y
chr7_22306583_22357656	46.5623	-9.14737	1.22647	-7.4583	8.76451e-14	1.04765e-11	Y
chr8_106431372_106456609	46.8865	-9.15779	1.23008	-7.44486	9.70482e-14	1.13563e-11	Y
chr1_225273412_225284941	39.2222	6.06902	0.81608	7.43679	1.03158e-13	1.18631e-11	Y
chr3_111632166_111639266	86.8532	-8.94689	1.20548	-7.42188	1.15474e-13	1.30544e-11	Y
chr1_94107860_94140497	87.6913	-3.12635	0.425525	-7.34705	2.02626e-13	2.25252e-11	Y
chr7_47384353_47385954	63.7184	2.86886	0.390888	7.33935	2.14635e-13	2.30905e-11	Y
chr9_4286038_4286523	60.2433	-3.95579	0.538916	-7.34028	2.13153e-13	2.30905e-11	Y
chr2_36668401_36669878	99.2881	-8.64464	1.19604	-7.22769	4.91263e-13	5.20115e-11	Y
chr8_131164982_131181313	42.0141	-8.83669	1.22572	-7.20942	5.61923e-13	5.85629e-11	Y
chr2_240929491_240946787	358.159	0.988915	0.137819	7.17546	7.20655e-13	7.39502e-11	N
chr17_26490569_26499644	45.1416	-4.41466	0.617473	-7.14955	8.70627e-13	8.63254e-11	Y
chr17_722679_729318	71.8716	-3.0192	0.422181	-7.15143	8.58783e-13	8.63254e-11	Y
chr3_51575514_51586079	77.2488	-2.13399	0.298541	-7.14807	8.80079e-13	8.63254e-11	Y
chr3_171830242_171851336	81.2119	-2.65734	0.374766	-7.09066	1.33478e-12	1.29028e-10	Y
chr10_86177527_86185649	247.515	1.0793	0.152577	7.07378	1.50773e-12	1.43666e-10	Y
chr22_30032740_30038274	169.261	-1.58727	0.225562	-7.03695	1.96492e-12	1.84591e-10	Y
chr3_196807922_196846401	100.048	-2.47245	0.353519	-6.99381	2.67512e-12	2.4782e-10	Y
chr14_91444650_91467503	51.1944	-5.16524	0.740728	-6.9732	3.09818e-12	2.8308e-10	Y
chr10_116879949_116889297	40.849	-8.69489	1.24792	-6.96753	3.22564e-12	2.90744e-10	Y
chr9_14146688_14179779	43.0504	-8.58939	1.23674	-6.9452	3.77912e-12	3.3609e-10	Y
chr3_183056588_183107567	75.0503	-5.17438	0.746181	-6.93449	4.07702e-12	3.57812e-10	Y
chr8_74585342_74601048	325.615	0.913408	0.131943	6.92272	4.43046e-12	3.78861e-10	N
chr12_47497896_47501947	34.8733	8.97236	1.29601	6.92306	4.4198e-12	3.78861e-10	Y
chr7_42187825_42262894	34.1419	-8.7004	1.26272	-6.89021	5.57097e-12	4.70359e-10	Y
chr2_171538905_171539569	197.863	1.64188	0.238695	6.87855	6.04636e-12	5.04115e-10	Y
chr3_154801947_154836600	24.1175	8.78836	1.27973	6.86738	6.53909e-12	5.38466e-10	Y
chr13_96636058_96651561	82.2646	2.28536	0.333434	6.85401	7.18081e-12	5.84098e-10	Y
chr1_44773982_44785416	172.01	1.52283	0.222602	6.84102	7.8632e-12	6.31898e-10	Y
chr20_62421174_62422143	170.789	-1.96781	0.288685	-6.81646	9.33084e-12	7.33308e-10	Y
chr6_10703638_10705077	113.488	1.80336	0.264568	6.81625	9.34501e-12	7.33308e-10	Y
chr7_128281257_128289036	69.1197	-2.03886	0.299459	-6.80848	9.86373e-12	7.65013e-10	Y
chrX_106331666_106332069	240.569	0.965277	0.142064	6.79464	1.08581e-11	8.32455e-10	N
chr4_9642695_9643074	32.2682	-8.61797	1.27328	-6.76832	1.30283e-11	9.87483e-10	Y
chr5_111594926_111602027	45.2823	-8.23343	1.21702	-6.76525	1.33076e-11	9.97322e-10	Y
chr8_131370263_131414216	31.775	-8.34685	1.23998	-6.73144	1.67987e-11	1.24497e-09	Y
chr3_196118684_196129890	422.478	-1.31029	0.194898	-6.72295	1.78078e-11	1.30525e-09	Y
chr15_100794341_100871259	32.6381	-8.63475	1.28899	-6.69885	2.10062e-11	1.49055e-09	Y
chr21_16386665_16415895	487.411	-1.28874	0.192344	-6.70017	2.08181e-11	1.49055e-09	Y
chr5_167915607_167921655	83.63	-1.94696	0.290583	-6.70018	2.08165e-11	1.49055e-09	Y
chr15_100821434_100871259	42.0822	-4.1484	0.620289	-6.68785	2.26469e-11	1.59005e-09	Y
chr4_103225474_103236987	291.425	-2.12762	0.320007	-6.64867	2.95752e-11	2.05486e-09	Y
chr19_49136701_49136912	30.2549	-8.22467	1.24326	-6.61539	3.70562e-11	2.54809e-09	Y
chr16_85667520_85667738	90.6162	2.36626	0.358558	6.59937	4.12908e-11	2.8103e-09	Y
chr3_138289160_138291774	148.404	-1.33697	0.202669	-6.59681	4.20084e-11	2.83027e-09	Y
chr8_52773405_52773806	131.84	1.25274	0.189991	6.59367	4.29092e-11	2.86205e-09	Y
chr3_31617888_31641951	88.1357	-2.19542	0.333286	-6.5872	4.48207e-11	2.95994e-09	Y
chr3_183097085_183107567	79.2542	-7.95511	1.21276	-6.55953	5.39792e-11	3.49555e-09	Y
chr7_42187825_42212285	29.6983	-8.31762	1.26774	-6.56096	5.34628e-11	3.49555e-09	Y
chr3_60751257_60752831	28.3321	-8.4312	1.28697	-6.55122	5.70702e-11	3.66017e-09	Y
chr14_99924616_99932150	976.478	0.597458	0.0914139	6.53575	6.32912e-11	4.0205e-09	N
chr3_78987751_78988077	21.555	8.75197	1.34523	6.50594	7.72113e-11	4.85435e-09	Y
chr5_77805607_77806221	193.755	1.49502	0.229838	6.50465	7.78734e-11	4.85435e-09	Y
chr6_158994452_159010814	146.951	2.3723	0.365468	6.49111	8.52045e-11	5.26217e-09	Y
chr10_11893996_11894214	43.1509	-8.0092	1.23538	-6.48318	8.98081e-11	5.4956e-09	Y
chr8_129021836_129022690	72.955	-1.83165	0.282822	-6.47635	9.39657e-11	5.69774e-09	Y
chr17_44143903_44172067	238.709	-1.11259	0.171877	-6.47315	9.59807e-11	5.76749e-09	Y
chr5_34179118_34182972	113.156	2.0522	0.317491	6.46381	1.02096e-10	6.02637e-09	Y
chr9_88211277_88248289	38.524	-4.94511	0.764888	-6.46514	1.01202e-10	6.02637e-09	Y
chr2_11426665_11428575	41.999	-7.9483	1.23037	-6.46008	1.0465e-10	6.12294e-09	Y
chr4_88116476_88116842	226.16	1.5719	0.244194	6.43708	1.21792e-10	7.06395e-09	Y
chr10_71243447_71258152	19.1822	8.46944	1.32015	6.4155	1.40362e-10	8.07084e-09	Y
chr1_214564331_214571344	27.859	-8.01166	1.24966	-6.41106	1.44509e-10	8.23822e-09	Y
chr6_87920169_87928449	97.7769	-1.68639	0.264745	-6.36984	1.89228e-10	1.06962e-08	Y
chr18_8718422_8720494	75.6972	1.9461	0.305638	6.36735	1.92326e-10	1.078e-08	Y
chr1_247320386_247323115	23.3346	8.2855	1.30254	6.36101	2.00434e-10	1.11408e-08	Y
chr1_214089278_214139627	22.9225	8.84016	1.39214	6.35004	2.15262e-10	1.18661e-08	Y
chr10_116247717_116251637	28.1575	-7.91012	1.24839	-6.33628	2.35376e-10	1.28685e-08	Y
chr2_36623757_36669878	49.827	-5.60106	0.890356	-6.29081	3.15812e-10	1.71258e-08	Y
chr6_107824861_107827631	33.561	8.12246	1.29278	6.28296	3.32192e-10	1.78687e-08	Y
chr1_41474466_41475261	29.9048	7.84166	1.24931	6.27679	3.45632e-10	1.84429e-08	Y
chr1_85816098_85824530	66.7799	-2.98015	0.47707	-6.24678	4.19014e-10	2.21811e-08	Y
chr5_21491430_21497305	296.55	1.03055	0.165251	6.23627	4.48119e-10	2.35351e-08	N
chr7_155556503_155567341	19.0305	8.28221	1.33336	6.21154	5.24666e-10	2.734e-08	Y
chrX_47705504_47755339	382.87	1.04265	0.168062	6.20396	5.50584e-10	2.84682e-08	Y
chr17_80992911_81006661	58.2722	7.61918	1.2298	6.19545	5.81201e-10	2.98201e-08	Y
chr4_6925100_6925838	154.875	1.49811	0.243453	6.1536	7.57443e-10	3.8566e-08	Y
chr7_716866_751164	955.694	-0.85686	0.13951	-6.14192	8.15318e-10	4.11983e-08	N
chr16_28112779_28113266	76.6267	2.36846	0.389657	6.07832	1.21447e-09	6.09059e-08	Y
chr1_247302018_247323115	146.9	1.71461	0.282179	6.07633	1.22966e-09	6.09394e-08	Y
chr9_91680444_91692818	22.9123	8.56296	1.40935	6.07584	1.23341e-09	6.09394e-08	Y
chr2_148730308_148739650	102.199	-1.77474	0.292314	-6.07134	1.2685e-09	6.22127e-08	Y
chr6_84108086_84117620	241.111	1.04181	0.171697	6.06772	1.29737e-09	6.31637e-08	N
chr3_124560230_124592378	25.4492	-7.62714	1.26281	-6.03982	1.54283e-09	7.457e-08	Y
chr16_4382216_4383520	23.1188	-7.73411	1.28203	-6.03272	1.61224e-09	7.73643e-08	Y
chr1_23397718_23398690	58.1171	2.66769	0.442742	6.02538	1.6871e-09	8.03781e-08	Y
chr5_170610199_170632616	190.772	-1.32298	0.219893	-6.01648	1.78256e-09	8.43237e-08	Y
chr5_95091100_95099324	356.582	-0.908977	0.151433	-6.00251	1.94286e-09	9.12597e-08	N
chr1_32745272_32745811	18.1031	8.49969	1.42339	5.97146	2.35138e-09	1.09676e-07	Y
chr10_93185038_93221941	89.4885	-3.56201	0.59728	-5.96372	2.46563e-09	1.14206e-07	N
chr19_20327949_20331226	17.1481	8.42174	1.4166	5.94503	2.76413e-09	1.2715e-07	Y
chr10_70227880_70229920	427.009	1.01081	0.170428	5.931	3.01101e-09	1.36622e-07	N
chr20_30954187_30959677	393.079	-0.923933	0.15578	-5.93102	3.01052e-09	1.36622e-07	N
chr1_214068006_214139627	17.1745	8.42384	1.42737	5.90165	3.59878e-09	1.62188e-07	Y
chr3_183361268_183369064	50.8031	-3.10262	0.532126	-5.83062	5.52223e-09	2.47203e-07	Y
chr2_219299249_219300157	20.2934	8.66435	1.48665	5.82812	5.60548e-09	2.49257e-07	Y
chr7_77214860_77230123	111.733	-1.34839	0.232999	-5.78713	7.15986e-09	3.16267e-07	Y
chr2_75745182_75749613	23.3677	-8.08283	1.40071	-5.77053	7.90206e-09	3.46755e-07	Y
chr1_59805630_59844509	15.5595	7.96932	1.38313	5.76181	8.32161e-09	3.62421e-07	Y
chr5_122881111_122893258	78.6458	-1.63233	0.283348	-5.76088	8.36775e-09	3.62421e-07	Y
chrX_23748644_23751334	16.7994	7.67603	1.33327	5.75729	8.54765e-09	3.67825e-07	N
chr8_126692177_126738132	19.3207	-7.87793	1.37141	-5.74441	9.22428e-09	3.94397e-07	Y
chr14_40124049_40125012	14.2037	7.89476	1.37564	5.73898	9.52489e-09	4.04656e-07	Y
chr17_62587202_62602758	32.956	-4.59211	0.800809	-5.73433	9.7896e-09	4.1327e-07	Y
chr1_225195115_225284941	28.561	7.4637	1.30351	5.72586	1.02911e-08	4.30919e-07	Y
chr17_80914571_80923622	18.4623	7.9367	1.3863	5.72511	1.03369e-08	4.30919e-07	Y
chr16_89484692_89493477	20.4733	7.71819	1.35561	5.69351	1.24453e-08	5.15593e-07	Y
chr1_225211317_225211567	16.0284	7.99064	1.40423	5.69039	1.26749e-08	5.19442e-07	Y
chr10_1130343_1142186	151.369	1.41338	0.24839	5.69013	1.2694e-08	5.19442e-07	Y
chr7_30395344_30405911	50.499	-5.06937	0.895685	-5.65977	1.5158e-08	6.16487e-07	Y
chr20_7976673_7990962	69.3428	-1.70006	0.300691	-5.65385	1.56889e-08	6.34213e-07	Y
chr4_4650704_4651269	100.468	1.46137	0.258932	5.64384	1.66299e-08	6.68202e-07	Y
chr12_12397196_12397589	345.887	0.659237	0.116939	5.63744	1.72598e-08	6.89358e-07	N
chr9_88233898_88248289	142.203	-4.17156	0.740582	-5.63281	1.77295e-08	7.03904e-07	Y
chr15_72837161_72864506	49.9209	-2.66681	0.473969	-5.62656	1.83842e-08	7.25577e-07	Y
chr3_149563798_149619949	46.6307	-2.45891	0.437714	-5.61762	1.93604e-08	7.59612e-07	Y
chr3_143704385_143708679	36.2394	-7.63321	1.35925	-5.61576	1.95697e-08	7.63332e-07	Y
chr15_100739523_100871259	18.3188	-7.80189	1.39276	-5.60176	2.12185e-08	8.22834e-07	Y
chr7_30363258_30363918	24.5945	-7.13836	1.28243	-5.56627	2.60248e-08	1.00338e-06	Y
chr5_176370336_176385155	598.252	-0.933109	0.168807	-5.52767	3.24516e-08	1.24398e-06	N
chr2_64083440_64085070	266.005	-0.857767	0.156326	-5.48704	4.08717e-08	1.55779e-06	N
chr21_32554738_32567621	51.7122	-3.11444	0.571143	-5.45299	4.95288e-08	1.87703e-06	N
chr4_78694235_78697546	107.103	-1.25892	0.231446	-5.43936	5.34728e-08	2.01505e-06	Y
chr14_67431908_67525503	35.8935	-2.23669	0.411535	-5.435	5.47974e-08	2.05336e-06	Y
chr8_142195238_142200516	17.061	-7.69848	1.41806	-5.42889	5.67043e-08	2.11295e-06	Y
chr12_28458582_28460682	525.975	0.812686	0.149822	5.42434	5.81694e-08	2.14359e-06	N
chr13_99890681_99896878	92.9714	2.03662	0.375432	5.42474	5.80386e-08	2.14359e-06	Y
chr10_126176991_126186697	33.33	4.95808	0.920502	5.38628	7.19317e-08	2.63618e-06	Y
chr10_70545893_70546449	32.9509	2.93867	0.546445	5.3778	7.5403e-08	2.74829e-06	Y
chr7_156619299_156629579	354.91	-0.803293	0.149547	-5.37149	7.80865e-08	2.83064e-06	N
chr17_80721841_80739597	59.6201	-1.96151	0.365278	-5.36992	7.87705e-08	2.84e-06	Y
chr3_171830242_171944737	40.6977	-6.5812	1.22614	-5.36742	7.987e-08	2.86416e-06	Y
chr2_206305094_206305396	58.7723	-6.61716	1.23626	-5.35255	8.67248e-08	3.09334e-06	Y
chr1_59787208_59812070	13.7395	7.82827	1.463	5.35082	8.75562e-08	3.10638e-06	Y
chr4_148778704_148803083	37.2039	-3.05661	0.5732	-5.33253	9.68519e-08	3.418e-06	Y
chr1_78183552_78191447	24.6338	-6.79989	1.27783	-5.32145	1.02942e-07	3.61381e-06	Y
chr6_129932678_129939997	14.4183	7.48032	1.40655	5.31819	1.04807e-07	3.66e-06	Y
chr10_225934_267296	82.2747	1.89437	0.357055	5.30554	1.12343e-07	3.90274e-06	Y
chr6_20781376_20846409	38.5985	2.22396	0.419725	5.29861	1.16689e-07	4.03273e-06	Y
chr7_103777228_103805730	18.1107	-7.01871	1.32895	-5.2814	1.282e-07	4.40772e-06	Y
chrX_106394086_106396733	13.8194	7.30084	1.38342	5.27737	1.31051e-07	4.48261e-06	N
chr3_127800097_127806651	15.9884	7.38478	1.3998	5.27558	1.32335e-07	4.50343e-06	Y
chr15_101775287_101775782	44.8709	-2.31132	0.439433	-5.25979	1.44222e-07	4.88306e-06	Y
chr5_56160561_56161804	124.491	-1.02406	0.195535	-5.23723	1.63002e-07	5.4361e-06	N
chr21_38792601_38802702	181.108	-0.991594	0.189269	-5.23907	1.61391e-07	5.4361e-06	Y
chr4_1221987_1235307	99.0234	1.56735	0.299255	5.2375	1.62768e-07	5.4361e-06	Y
chr3_11641366_11643496	15.1184	8.20426	1.56705	5.23549	1.64547e-07	5.46033e-06	Y
chr12_48134425_48137459	16.9809	-7.69157	1.47282	-5.22234	1.76679e-07	5.8339e-06	Y
chr16_66655965_66657405	13.1957	8.04417	1.54206	5.2165	1.8234e-07	5.99118e-06	Y
chr1_8601273_8674745	114.547	1.20921	0.232198	5.20766	1.91233e-07	6.25258e-06	Y
chr11_120524394_120531109	13.5888	8.08606	1.55787	5.19045	2.09785e-07	6.82569e-06	Y
chr9_79852918_79853302	37.2615	4.54031	0.875345	5.18688	2.13845e-07	6.92401e-06	N
chr21_32537279_32567621	54.3232	-3.15295	0.608415	-5.18223	2.19243e-07	7.0645e-06	N
chr2_101521195_101554304	13.1474	7.29398	1.40899	5.17673	2.25806e-07	7.24098e-06	N
chr8_129001408_129022690	27.4853	-4.72463	0.913588	-5.17151	2.32205e-07	7.41056e-06	Y
chr17_19999944_20013875	12.4057	7.35457	1.42445	5.16309	2.42904e-07	7.71509e-06	Y
chr3_149613260_149639014	101.108	-1.57984	0.306078	-5.16156	2.44905e-07	7.74178e-06	Y
chr9_4823548_4833228	132.386	1.61882	0.313784	5.15904	2.48226e-07	7.80974e-06	Y
chr5_141511373_141524241	15.5099	-7.21288	1.39874	-5.15668	2.51365e-07	7.87138e-06	Y
chr14_102486230_102489217	46.7836	-2.13599	0.414976	-5.14725	2.64332e-07	8.23875e-06	Y
chr1_94685814_94697199	33.2834	-3.94732	0.767491	-5.14315	2.70175e-07	8.38169e-06	Y
chr1_63944435_63955889	16.4004	6.9272	1.35469	5.11349	3.16268e-07	9.76622e-06	Y
chr5_107521818_107684231	97.2154	1.43657	0.281045	5.11153	3.19567e-07	9.82265e-06	Y
chr4_103635595_103647840	40.0613	-2.48635	0.486718	-5.10839	3.2491e-07	9.94106e-06	Y
chr17_44159807_44172067	72.7385	-1.78281	0.350204	-5.09076	3.56626e-07	1.08616e-05	Y
chr19_43498902_43499513	15.3017	-7.54207	1.48432	-5.08117	3.75118e-07	1.13214e-05	Y
chr9_139115853_139118720	60.2842	1.5685	0.308669	5.08149	3.74488e-07	1.13214e-05	Y
chr16_68300496_68309152	121.708	1.522	0.299862	5.07568	3.86109e-07	1.16007e-05	Y
chr15_60648118_60656722	22.8368	-6.0047	1.18426	-5.07041	3.96968e-07	1.18734e-05	Y
chr6_137015278_137019820	42.3806	3.16091	0.623614	5.06869	4.00569e-07	1.19277e-05	Y
chr4_154191487_154197282	38.3139	-4.07004	0.80379	-5.06356	4.115e-07	1.21987e-05	Y
chr8_124089351_124096580	95.9935	1.69991	0.335906	5.06068	4.17767e-07	1.23297e-05	Y
chr10_12291580_12292468	11.3118	7.32999	1.45728	5.02991	4.90722e-07	1.43558e-05	Y
chrX_107083900_107097934	17.5844	-7.23457	1.43818	-5.03036	4.8956e-07	1.43558e-05	Y
chr2_38812786_38818790	58.0962	-1.85247	0.368513	-5.02687	4.98543e-07	1.45209e-05	Y
chr5_95099212_95119667	65.5281	-1.73169	0.3448	-5.02231	5.10529e-07	1.48053e-05	Y
chr5_14270934_14280545	13.62	7.41675	1.48053	5.00952	5.45651e-07	1.57554e-05	Y
chr1_46032241_46032692	48.5512	2.5975	0.521348	4.98228	6.28394e-07	1.80663e-05	Y
chrX_133607389_133632714	58.1312	2.04028	0.410067	4.97549	6.50836e-07	1.86312e-05	Y
chr17_62557618_62568074	27.2526	-4.17006	0.84076	-4.95987	7.05416e-07	2.01074e-05	Y
chr7_5680785_5692141	62.885	-1.53722	0.310257	-4.95467	7.24533e-07	2.05644e-05	Y
chr5_38971979_38978752	11.8606	7.02794	1.41873	4.95369	7.28203e-07	2.0581e-05	Y
chr7_2393549_2400537	17.7119	-7.75335	1.56609	-4.95077	7.39222e-07	2.08043e-05	Y
chr19_1031070_1032695	153.975	1.21478	0.245578	4.94662	7.55149e-07	2.11632e-05	Y
chr9_21476898_21477291	24.3781	-6.45422	1.30671	-4.93928	7.84133e-07	2.18835e-05	Y
chr4_154236637_154237151	13.632	-6.91322	1.40123	-4.93367	8.06992e-07	2.24276e-05	Y
chr9_96233423_96238620	392.987	0.898331	0.182361	4.92612	8.3877e-07	2.32141e-05	N
chr14_68151732_68157138	18.6005	-6.54641	1.33285	-4.91158	9.03475e-07	2.47991e-05	Y
chr3_196812451_196842954	48.3769	-2.58218	0.525725	-4.91166	9.03107e-07	2.47991e-05	Y
chr5_111570331_111602027	15.471	-6.57289	1.34269	-4.89532	9.81458e-07	2.68292e-05	Y
chr1_165648679_165652347	25.5269	-6.42083	1.31355	-4.88815	1.01789e-06	2.75989e-05	Y
chr11_14880589_14882912	11.4202	7.46853	1.52776	4.88856	1.01576e-06	2.75989e-05	Y
chr4_39077585_39088347	17.1251	-6.5021	1.33819	-4.85887	1.18055e-06	3.18796e-05	Y
chr1_214133453_214139627	11.5774	7.85532	1.61906	4.85178	1.22359e-06	3.27432e-05	Y
chr11_70505933_70507783	109.127	1.27727	0.263208	4.85271	1.21788e-06	3.27432e-05	Y
chr7_30363258_30405911	14.4925	-6.65428	1.37168	-4.85119	1.22726e-06	3.27432e-05	Y
chr4_129913322_129925031	153.488	-1.76261	0.363479	-4.84926	1.2392e-06	3.28207e-05	Y
chr8_142170731_142173528	25.956	-4.75703	0.981005	-4.84914	1.24e-06	3.28207e-05	Y
chr1_94037227_94041686	14.9857	-6.85465	1.41561	-4.8422	1.2841e-06	3.38536e-05	Y
chr18_9931807_9937063	479.83	-0.645955	0.133583	-4.8356	1.32747e-06	3.48592e-05	N
chr2_88482218_88482592	12.7748	-6.71794	1.39278	-4.82342	1.41121e-06	3.69128e-05	Y
chr5_131013396_131034695	13.1681	-6.66125	1.38582	-4.80671	1.53435e-06	3.9977e-05	Y
chr6_150092298_150094305	54.9325	1.87966	0.391681	4.79896	1.59488e-06	4.13925e-05	Y
chr14_50131344_50141145	13.4146	6.81966	1.4224	4.79445	1.63118e-06	4.21704e-05	Y
chr15_59470592_59480415	16.6102	6.53271	1.36393	4.78964	1.67083e-06	4.2536e-05	Y
chr6_86267694_86284096	31.6459	-3.20957	0.669934	-4.79088	1.66053e-06	4.2536e-05	Y
chr8_141749117_141762415	108.757	1.48101	0.309102	4.79133	1.6568e-06	4.2536e-05	Y
chr9_125042722_125054119	131.378	-1.01567	0.212046	-4.78986	1.66896e-06	4.2536e-05	Y
chr13_113170754_113176823	10.6924	7.27641	1.52367	4.77557	1.79197e-06	4.54466e-05	Y
chr2_170728746_170735084	48.3691	-2.10255	0.440379	-4.77442	1.80223e-06	4.55337e-05	Y
chr1_65830318_65831879	394.679	0.617499	0.129734	4.75971	1.93867e-06	4.8796e-05	N
chr22_18975270_18975708	26.7977	3.1937	0.671203	4.75817	1.95358e-06	4.89864e-05	Y
chr7_44025791_44026276	11.7526	7.33641	1.54352	4.75304	2.00383e-06	5.00581e-05	Y
chr5_176370336_176378578	89.7781	-1.22296	0.257635	-4.74688	2.06577e-06	5.14129e-05	Y
chr1_213037067_213046160	15.1163	6.65602	1.4025	4.74583	2.0765e-06	5.1488e-05	Y
chr6_151198770_151209117	27.5402	3.4804	0.735309	4.73325	2.20951e-06	5.45831e-05	Y
chr1_247319708_247323115	269.544	1.08078	0.229469	4.70989	2.47852e-06	6.10027e-05	Y
chr5_39002637_39021238	41.4467	3.3964	0.722234	4.70263	2.56831e-06	6.29803e-05	N
chr3_67546222_67559327	136.245	-1.28376	0.273269	-4.69778	2.62999e-06	6.42564e-05	Y
chr3_43591212_43607219	29.9158	-3.90265	0.831364	-4.69427	2.67554e-06	6.51309e-05	N
chr2_15629018_15651474	30.0193	-3.97267	0.846657	-4.69218	2.70312e-06	6.55005e-05	N
chr12_65720606_65762806	45.4524	-2.99777	0.638962	-4.69163	2.71036e-06	6.55005e-05	Y
chr3_149563798_149639014	201.633	-1.14886	0.245176	-4.68586	2.78789e-06	6.68893e-05	Y
chr3_196812451_196846401	108.914	-1.59871	0.341164	-4.68604	2.78545e-06	6.68893e-05	Y
chr11_63426233_63426724	60.0943	-2.96055	0.632127	-4.68347	2.8206e-06	6.74315e-05	N
chr9_6420912_6421142	10.213	7.20633	1.53898	4.68253	2.83359e-06	6.75001e-05	Y
chr1_92798948_92846430	273.573	0.866201	0.185268	4.67539	2.93395e-06	6.93951e-05	N
chr13_76134889_76143643	222.203	0.811186	0.17349	4.6757	2.92949e-06	6.93951e-05	N
chr17_1540003_1540356	12.4248	-6.57299	1.40956	-4.66313	3.11431e-06	7.34008e-05	Y
chr13_76195899_76301234	35.6297	2.7048	0.58184	4.6487	3.34026e-06	7.84491e-05	Y
chr2_191523884_191535185	10.7987	7.13883	1.53591	4.64795	3.35256e-06	7.84617e-05	Y
chr1_214068006_214074752	10.5667	7.72337	1.66431	4.64058	3.47429e-06	8.10263e-05	Y
chr12_22796697_22826594	115.566	1.12188	0.242485	4.62658	3.71756e-06	8.63976e-05	Y
chr21_37619815_37620866	51.7154	-1.64973	0.357404	-4.61586	3.9148e-06	9.06657e-05	Y
chr18_33775220_33783152	13.1038	6.69681	1.45308	4.60869	4.05217e-06	9.35224e-05	Y
chr2_58425729_58459247	145.234	1.29189	0.281462	4.58994	4.4338e-06	0.000101977	N
chr11_43436140_43457884	11.6464	6.6103	1.44275	4.58175	4.61103e-06	0.000105689	N
chr7_17885218_17890587	64.0502	1.36388	0.298521	4.56881	4.90512e-06	0.000112045	Y
chr7_152760682_152768089	11.488	7.63563	1.67538	4.55754	5.1756e-06	0.00011782	Y
chr17_19921300_20013875	10.786	7.16362	1.57345	4.55282	5.29315e-06	0.000120086	Y
chr14_103470265_103478525	77.8975	-2.43977	0.537185	-4.54177	5.57849e-06	0.000125705	N
chr16_31733947_31734674	131.447	-1.02687	0.226088	-4.54189	5.57515e-06	0.000125705	Y
chr3_183695305_183696439	10.9496	-6.50847	1.43497	-4.53561	5.74366e-06	0.000128991	Y
chr11_107959254_107960350	8.9739	6.99657	1.54335	4.53336	5.80521e-06	0.000129935	N
chr1_44804717_44804994	10.5653	6.77879	1.49813	4.52483	6.04433e-06	0.000134835	Y
chr13_103275227_103280274	62.2399	1.3702	0.303002	4.52209	6.12334e-06	0.000136142	Y
chr1_214625148_214638300	14.8899	-6.74526	1.49263	-4.51904	6.21213e-06	0.000137658	Y
chr21_26825503_26838789	10.1365	7.66331	1.69713	4.51545	6.31836e-06	0.000139548	Y
chr4_85818064_85853516	32.1344	-4.511	1.00053	-4.50859	6.52592e-06	0.000143184	Y
chr6_117019867_117026323	103.638	1.45223	0.322081	4.5089	6.51653e-06	0.000143184	Y
chr11_130130751_130131824	182.056	-0.756638	0.167952	-4.50509	6.63433e-06	0.000144611	N
chr12_120592774_120593523	667.984	0.528686	0.117339	4.50563	6.61777e-06	0.000144611	N
chr5_133534777_133541822	80.7489	-1.49427	0.331941	-4.50162	6.7438e-06	0.000146518	Y
chr2_240078348_240085619	55.8452	3.23658	0.719865	4.49609	6.9213e-06	0.000149298	N
chr11_66589114_66595835	12.5125	-6.30143	1.4017	-4.49555	6.93888e-06	0.000149298	Y
chr17_79928252_79943483	12.204	-7.21506	1.60462	-4.49642	6.91067e-06	0.000149298	Y
chr10_72099752_72100458	9.52191	6.65973	1.48211	4.49343	7.00859e-06	0.000150313	Y
chr3_31617888_31621588	560.366	-0.550069	0.122544	-4.48874	7.16462e-06	0.000153167	N
chr5_176562088_176619020	10.7515	7.25121	1.61629	4.48634	7.24568e-06	0.000154405	Y
chr6_20739750_20781496	26.1395	3.2189	0.719524	4.47365	7.68945e-06	0.00016334	Y
chr9_6814631_6893232	45.8376	2.2205	0.497053	4.46734	7.91984e-06	0.000167699	Y
chr1_214068006_214089442	10.0021	7.64398	1.71402	4.45967	8.20876e-06	0.000172721	Y
chr1_247322308_247323115	96.1726	1.10811	0.248453	4.46005	8.19401e-06	0.000172721	Y
chr9_132265602_132265951	10.7534	6.5349	1.46951	4.44698	8.70849e-06	0.000182659	Y
chr3_141231005_141259451	48.7648	-2.06091	0.463882	-4.44273	8.88226e-06	0.00018572	Y
chr22_50810449_50832564	73.1162	-2.01528	0.453809	-4.44081	8.96208e-06	0.000186221	Y
chr4_146767108_146770713	57.8928	-1.6539	0.372384	-4.4414	8.93773e-06	0.000186221	Y
chr2_98430434_98435184	13.2888	-6.11725	1.37931	-4.43502	9.20621e-06	0.0001907	N
chr19_2438161_2438529	9.06937	6.99799	1.57881	4.43243	9.31763e-06	0.000192411	N
chr11_9451221_9452550	491.1	0.702611	0.158675	4.42799	9.5117e-06	0.000195812	N
chr12_116674626_116675510	87.9916	-2.13275	0.482305	-4.422	9.7793e-06	0.000200701	Y
chr20_56846419_56847931	61.3875	-1.68502	0.382142	-4.4094	1.03656e-05	0.000212081	Y
chr20_2944918_2945848	10.6442	-6.46106	1.46602	-4.40722	1.04708e-05	0.000213579	Y
chr19_47919909_47920607	18.0093	-7.29298	1.65691	-4.40155	1.07479e-05	0.000218562	Y
chr5_43675613_43704502	151.071	0.975297	0.221624	4.40068	1.07914e-05	0.000218781	N
chr13_45725822_45781640	31.1031	-2.14357	0.487363	-4.39829	1.09105e-05	0.000220525	Y
chr5_108203468_108219219	14.9065	-6.59919	1.50304	-4.39055	1.13064e-05	0.000227817	Y
chr8_48308936_48320523	21.4586	-6.08085	1.38519	-4.38991	1.13396e-05	0.000227817	Y
chr14_50130033_50141145	142.159	0.993464	0.22649	4.38634	1.15273e-05	0.000230201	N
chr16_47531310_47549512	349.055	-0.739356	0.168545	-4.38671	1.15078e-05	0.000230201	N
chr7_1937836_1976533	179.672	-0.780355	0.178139	-4.38059	1.1836e-05	0.000235659	N
chr3_122422589_122427115	18.708	-4.8199	1.10093	-4.378	1.19771e-05	0.00023776	Y
chr16_929570_961079	8.69883	6.97647	1.59404	4.37661	1.20541e-05	0.000238578	Y
chr6_2116005_2124965	40.643	2.22484	0.509139	4.36981	1.24357e-05	0.000245402	Y
chr11_36415396_36424928	10.4742	-6.53515	1.49606	-4.36823	1.25257e-05	0.00024645	Y
chr2_206023446_206058044	11.0905	-6.19826	1.41926	-4.36725	1.25821e-05	0.000246831	Y
chr5_31431683_31451747	9.7294	6.74079	1.54613	4.35977	1.30199e-05	0.000254672	Y
chr19_44237010_44237885	10.3192	-6.59422	1.51497	-4.35269	1.34474e-05	0.000262264	Y
chr4_108603171_108608333	20.9774	-4.4496	1.02254	-4.35153	1.35188e-05	0.000262888	Y
chrX_68250842_68256959	13.2919	-7.33947	1.68741	-4.34954	1.36421e-05	0.000264515	Y
chr13_113845186_113854830	43.1004	3.2522	0.747843	4.34877	1.36903e-05	0.000264678	N
chr5_619105_624694	45.6941	1.65103	0.3799	4.34594	1.38678e-05	0.000267336	Y
chr13_30854200_30857928	39.8679	-2.12233	0.489128	-4.33901	1.43129e-05	0.000275121	Y
chr9_14146688_14155892	10.6057	-6.51145	1.50094	-4.33824	1.43631e-05	0.000275294	Y
chr5_102231555_102237117	9.5137	7.57199	1.75012	4.32655	1.51462e-05	0.00028947	Y
chr3_56694759_56707753	27.5419	-3.66597	0.847703	-4.32459	1.52819e-05	0.000291229	N
chr19_6702138_6702590	14.5985	-5.94299	1.37484	-4.32267	1.54153e-05	0.000292935	Y
chr2_58311224_58316858	229.736	0.876165	0.202781	4.32074	1.55508e-05	0.000294669	N
chr7_74119496_74133260	180.746	-1.04417	0.241775	-4.31877	1.56902e-05	0.00029647	Y
chr18_77208782_77211816	12.0727	-6.09694	1.41385	-4.3123	1.61563e-05	0.000303556	Y
chr2_175976296_175986268	9.98747	-6.51745	1.51122	-4.3127	1.61273e-05	0.000303556	Y
chr16_148143_150507	25.8225	4.23625	0.982745	4.31063	1.62787e-05	0.000304998	N
chr21_33825620_33840156	12.3947	-6.41953	1.48981	-4.30895	1.64031e-05	0.000306468	Y
chr11_129551030_129552361	9.8622	7.62363	1.77182	4.30272	1.68716e-05	0.000314339	Y
chr2_136620177_136622733	114.576	-0.896232	0.208545	-4.29754	1.72701e-05	0.000320867	N
chr7_42063067_42066011	11.263	-7.10047	1.65412	-4.29258	1.76607e-05	0.000327213	Y
chr19_40964062_40964452	12.3706	-6.115	1.42584	-4.2887	1.7972e-05	0.000332059	Y
chr14_80963812_80997230	114.174	-1.31895	0.307625	-4.28753	1.80668e-05	0.000332889	Y
chr21_32537279_32575328	30.7492	-2.95518	0.690045	-4.28259	1.84727e-05	0.000339429	Y
chr16_69170599_69177292	9.80041	7.61487	1.77964	4.27889	1.87831e-05	0.000344184	Y
chr9_102677460_102691125	64.0724	1.30346	0.305011	4.27349	1.92435e-05	0.000351655	Y
chr15_49528048_49531564	277.518	0.656148	0.153684	4.26945	1.95953e-05	0.000357107	N
chr1_23356962_23370979	18.4338	6.88362	1.61646	4.25845	2.05848e-05	0.000374117	N
chr3_111828390_111831992	8.81534	-6.35144	1.4955	-4.24703	2.1662e-05	0.000392624	Y
chrX_54662668_54662860	8.27543	6.92209	1.63083	4.24451	2.19073e-05	0.000395994	N
chr20_21346059_21349228	103.036	1.05044	0.24774	4.24008	2.23444e-05	0.000402051	N
chr16_89484692_89488713	83.2822	1.41408	0.333518	4.23989	2.2363e-05	0.000402051	Y
chr19_1738954_1740327	9.67878	7.18402	1.69654	4.23452	2.29045e-05	0.000409579	Y
chr19_45528587_45528995	23.9201	-3.03976	0.71777	-4.23501	2.28545e-05	0.000409579	Y
chr1_29362338_29365938	51.843	1.56258	0.369768	4.22583	2.38065e-05	0.000423515	Y
chr7_56049903_56051561	132.634	1.28513	0.304117	4.22579	2.38108e-05	0.000423515	Y
chr1_233372591_233388534	7.35855	6.66148	1.57679	4.22471	2.39245e-05	0.000424406	Y
chr2_37543380_37544322	43.6738	-2.44802	0.579701	-4.22289	2.41185e-05	0.000426712	Y
chr17_15449099_15458678	14.5033	-6.03241	1.42943	-4.22016	2.4413e-05	0.000430779	Y
chr4_140046318_140060651	40.1634	-3.5588	0.845432	-4.20945	2.55997e-05	0.000449714	N
chr7_104800954_104809712	30.912	-2.76186	0.65614	-4.20926	2.56209e-05	0.000449714	Y
chr17_64092369_64128881	26.8829	-4.56319	1.08646	-4.20005	2.6686e-05	0.00046718	Y
chr12_11273609_11285966	11.3863	7.4682	1.77864	4.19883	2.68293e-05	0.000468459	Y
chr9_140622801_140638542	11.0001	-6.23137	1.48471	-4.19702	2.70454e-05	0.000470999	Y
chr10_5836848_5842668	118.433	0.934135	0.222863	4.19152	2.77097e-05	0.000481311	N
chr1_40654727_40668286	43.615	-2.10624	0.502611	-4.19059	2.78232e-05	0.000482028	Y
chr21_46548317_46554747	14.6602	-5.75028	1.37335	-4.18705	2.82601e-05	0.000487645	N
chr12_8082280_8083238	10.8199	-7.04143	1.68182	-4.18678	2.82936e-05	0.000487645	Y
chr3_4403723_4418073	30.3605	-5.48497	1.3118	-4.18125	2.89905e-05	0.000497087	N
chr16_70346512_70350007	8.91077	7.47758	1.78822	4.18159	2.89476e-05	0.000497087	Y
chr17_81006347_81006661	23.3766	6.29174	1.50603	4.1777	2.94474e-05	0.000502773	N
chr4_1219148_1235307	438.662	0.487607	0.116722	4.1775	2.94729e-05	0.000502773	N
chr5_170305101_170323119	198.865	-0.932513	0.223327	-4.17554	2.97282e-05	0.000505834	N
chr15_72810408_72848248	54.6865	1.53156	0.367156	4.17142	3.02712e-05	0.000513764	Y
chr6_17507400_17514185	25.859	6.0852	1.46125	4.16438	3.12205e-05	0.000527192	N
chr12_27824364_27827154	9.77485	-6.50873	1.56288	-4.16457	3.11934e-05	0.000527192	Y
chr11_77336008_77336863	113.414	1.08323	0.260646	4.15596	3.23931e-05	0.000545612	Y
chr2_44436349_44445676	49.1995	-1.66174	0.40056	-4.14854	3.34607e-05	0.000562173	Y
chr15_51240217_51250991	33.5294	3.32564	0.802181	4.14575	3.38706e-05	0.000567631	N
chr6_138794443_138817508	45.6478	-1.73074	0.417999	-4.14054	3.46492e-05	0.000579223	Y
chr13_25051839_25052414	28.1482	-3.28294	0.794805	-4.1305	3.61977e-05	0.000603597	Y
chr4_110580167_110585550	23.9679	-4.42702	1.0727	-4.12699	3.6755e-05	0.000611361	Y
chr1_89236035_89251896	9.90842	-6.33103	1.5347	-4.12526	3.7032e-05	0.000614436	N
chr6_155095123_155114110	9.37811	6.84071	1.65907	4.12321	3.73625e-05	0.000617905	Y
chr7_42116351_42262894	10.8675	-7.04741	1.70937	-4.12282	3.74263e-05	0.000617905	Y
chr2_172305191_172333460	7.47305	6.53254	1.58716	4.11587	3.8572e-05	0.000635248	Y
chr10_128923738_128926028	7.36864	6.78636	1.64948	4.11425	3.88438e-05	0.000638148	Y
chr1_214110597_214139627	9.20614	7.52464	1.82944	4.11307	3.9043e-05	0.000639845	Y
chr20_50290692_50307358	26.1656	-3.94693	0.961834	-4.10355	4.06862e-05	0.00066514	N
chr11_46515158_46534363	134.173	-1.24724	0.304412	-4.09723	4.18121e-05	0.000680211	Y
chr7_106921745_106938791	11.146	-6.17426	1.5068	-4.0976	4.17454e-05	0.000680211	Y
chr7_157449049_157475629	32.8958	3.51911	0.859034	4.09659	4.19283e-05	0.000680442	Y
chr16_29323671_29339945	22.1541	4.04283	0.987217	4.09518	4.21842e-05	0.000682934	Y
chr16_28157415_28181230	8.26986	6.62207	1.62343	4.07905	4.52196e-05	0.000730302	Y
chr8_141710990_141716304	58.1295	1.54837	0.380183	4.07269	4.64741e-05	0.000748749	Y
chr3_179481790_179483636	23.9015	-3.47359	0.853736	-4.06869	4.72778e-05	0.000759863	N
chr8_26439485_26441499	341.167	-0.862255	0.212066	-4.06597	4.78329e-05	0.000766936	N
chr1_9991949_9994918	178.967	0.967863	0.238203	4.06318	4.84085e-05	0.000774304	N
chr2_98504515_98543950	9.36294	-6.50489	1.60257	-4.05903	4.92777e-05	0.000784445	Y
chr4_186168448_186209236	25.0357	-2.97519	0.73297	-4.0591	4.92629e-05	0.000784445	Y
chr10_62021617_62039397	9.06812	7.50277	1.85054	4.05436	5.02708e-05	0.000798348	Y
chr12_22811948_22826594	61.8638	2.10142	0.518497	4.05291	5.05854e-05	0.000801436	N
chr1_155823067_155823597	117.492	0.926901	0.22919	4.04424	5.24931e-05	0.000829689	N
chr21_34717552_34721849	11.4786	-5.80185	1.43517	-4.04262	5.28577e-05	0.000833477	N
chr1_47753223_47761520	9.11652	-5.98502	1.48192	-4.03871	5.3747e-05	0.000845501	N
chr10_5827105_5842668	279.983	0.842765	0.20888	4.03469	5.46755e-05	0.000858084	N
chr4_128842679_128861152	20.7803	-3.7138	0.921853	-4.02863	5.61036e-05	0.000878429	N
chr13_28748409_28752072	55.3257	-1.5887	0.395233	-4.01966	5.82824e-05	0.000910406	Y
chrX_149962164_149984551	9.0311	-6.25395	1.55947	-4.0103	6.06427e-05	0.000942859	Y
chrX_46510545_46513140	35.8722	1.97623	0.492779	4.01038	6.06215e-05	0.000942859	Y
chr12_8866407_8866637	30.0478	-4.61096	1.15371	-3.99664	6.42481e-05	0.000996593	Y
chrX_130917915_130919286	8.47861	6.87414	1.72187	3.99226	6.54478e-05	0.00101285	Y
chr7_107188556_107198560	7.77344	-6.2384	1.56324	-3.99069	6.5881e-05	0.00101719	N
chr19_41758256_41762516	10.6471	-6.84545	1.71763	-3.98541	6.73627e-05	0.00103767	Y
chr8_28827560_28828036	8.50468	-6.15907	1.54871	-3.97691	6.98167e-05	0.00107299	Y
chr7_106921745_106924177	13.0158	-5.84641	1.47096	-3.97454	7.05148e-05	0.00108123	N
chr8_27382879_27394372	10.0207	-6.90492	1.73801	-3.97289	7.10067e-05	0.00108627	Y
chr3_31774749_31789612	8.06935	-6.11378	1.54185	-3.96523	7.33254e-05	0.00111918	Y
chr6_20546577_20577388	9.04928	-6.05843	1.52817	-3.96451	7.35471e-05	0.00112	Y
chr14_102506573_102507010	75.3242	-1.62993	0.411489	-3.96106	7.46192e-05	0.00113374	Y
chr10_12257739_12280484	55.2486	1.41844	0.358521	3.95637	7.60973e-05	0.00115357	Y
chr13_98865474_98865667	87.1838	1.60747	0.406592	3.95353	7.70051e-05	0.00116468	Y
chr2_72945232_72968598	8.76767	-6.10539	1.54694	-3.94676	7.92171e-05	0.00119543	Y
chr3_76399974_76403536	9.44621	7.562	1.91732	3.94405	8.0116e-05	0.00120626	Y
chr2_65228582_65237897	9.20475	-5.97355	1.51826	-3.93448	8.33763e-05	0.00125252	Y
chr5_37331787_37341344	8.99638	7.20362	1.83412	3.92757	8.581e-05	0.00128619	Y
chr6_146209156_146216113	67.9464	2.04164	0.5207	3.92095	8.82023e-05	0.00131908	N
chr4_123900387_124011860	9.56366	-5.78995	1.47927	-3.91407	9.07546e-05	0.00135119	N
chr17_76187051_76188866	9.9659	7.57348	1.93477	3.9144	9.06292e-05	0.00135119	Y
chr22_50191453_50198008	9.22647	7.15978	1.83309	3.90585	9.38965e-05	0.00139485	Y
chr2_184022172_184025923	14.0403	-5.52708	1.41577	-3.90393	9.46438e-05	0.00140283	N
chr20_43248940_43251571	8.04792	7.33047	1.87849	3.90232	9.52738e-05	0.00140904	Y
chr2_191523884_191537878	214.293	0.903889	0.231865	3.89834	9.68534e-05	0.00142923	N
chr15_93540187_93541851	16.5544	4.77804	1.22585	3.89772	9.71025e-05	0.00142974	N
chr3_195101738_195112876	69.7694	-1.31046	0.3364	-3.89555	9.7975e-05	0.00143941	Y
chr4_186180002_186188309	10.0703	-6.89864	1.77238	-3.89232	9.92919e-05	0.00145555	Y
chr16_68090267_68105011	8.39148	7.39135	1.90387	3.88229	0.000103479	0.00150527	Y
chr2_227771509_227779067	36.9349	2.2901	0.589704	3.88347	0.000102974	0.00150527	Y
chr21_42860321_42861520	7.9001	7.30371	1.88141	3.88203	0.000103586	0.00150527	Y
chr6_142094010_142119292	9.1438	7.51443	1.93551	3.88241	0.000103427	0.00150527	Y
chr11_65661485_65664477	58.6993	-1.45842	0.376138	-3.87734	0.000105605	0.00152882	Y
chr6_137015278_137018525	8.44347	7.21352	1.86075	3.87667	0.000105894	0.00152882	Y
chr8_106427103_106456609	9.95244	-6.92134	1.78527	-3.87691	0.000105791	0.00152882	Y
chr14_76184204_76187046	9.12267	-6.16316	1.59316	-3.86851	0.000109503	0.00157751	Y
chr20_17937577_17941969	37.4379	1.49013	0.38537	3.86675	0.000110294	0.00158548	Y
chr11_68125118_68133170	7.95878	7.14011	1.84732	3.86512	0.000111034	0.00159267	Y
chr8_19221583_19231171	7.97524	-6.20574	1.60611	-3.86383	0.000111625	0.00159772	Y
chr2_168920010_168931741	49.1028	-1.50401	0.389732	-3.8591	0.000113807	0.00162546	Y
chr10_5815805_5842668	170.182	0.646232	0.167532	3.85737	0.000114614	0.00163349	N
chr2_148730308_148733544	134.836	0.983603	0.255155	3.85492	0.000115769	0.00164293	N
chr4_4088385_4089120	7.73078	7.27259	1.88636	3.85536	0.000115561	0.00164293	Y
chr1_151611364_151611595	244.78	0.761862	0.197872	3.85028	0.000117985	0.00166729	N
chr5_135483521_135489852	48.5119	-1.64911	0.428269	-3.85064	0.000117808	0.00166729	Y
chr4_110412483_110416012	39.9329	-2.53026	0.657667	-3.84733	0.000119411	0.00168388	N
chr22_43286953_43287188	102.433	-0.956311	0.248607	-3.84668	0.000119731	0.00168482	Y
chr9_111868788_111870850	86.0273	-0.992332	0.258049	-3.84551	0.000120302	0.00168929	Y
chr12_22796697_22796956	8.29418	7.13099	1.85491	3.84438	0.000120857	0.00169352	Y
chr4_151509200_151512011	24.0791	-2.85198	0.742391	-3.84162	0.000122227	0.00170912	Y
chr5_619105_620376	341.009	0.947503	0.246741	3.84007	0.000122999	0.00171475	N
chr11_68115315_68133170	42.5143	1.4007	0.364787	3.83978	0.000123143	0.00171475	Y
chr2_192141613_192160952	6.07731	6.46822	1.68549	3.83759	0.000124249	0.00172654	N
chr12_32871577_32875567	10.5661	6.68119	1.74163	3.83617	0.000124966	0.0017329	Y
chr20_34487292_34487570	14.826	6.29284	1.64129	3.83408	0.000126037	0.00174412	N
chr4_52729603_52744020	42.6446	1.53103	0.399565	3.83175	0.000127234	0.00175705	Y
chr6_30856465_30857207	21.7962	-4.70294	1.22776	-3.8305	0.000127885	0.00176239	Y
chr7_158566032_158591763	98.88	-1.01415	0.264931	-3.82797	0.000129204	0.00177689	Y
chr15_100692817_100871259	9.27175	-6.81867	1.78263	-3.82507	0.000130735	0.00178758	Y
chr17_73038276_73038754	12.7558	-4.79768	1.25406	-3.82573	0.000130385	0.00178758	Y
chr3_196612022_196613565	8.07092	-6.36788	1.66482	-3.82497	0.000130786	0.00178758	Y
chr18_697240_706578	8.62876	7.12983	1.86564	3.82165	0.00013256	0.00180813	Y
chr10_98703870_98711953	6.62693	6.27016	1.64128	3.8203	0.00013329	0.00181438	N
chr10_518379_532470	16.1845	6.29897	1.65105	3.81513	0.000136112	0.00184525	N
chr20_60888144_60888516	7.83595	-5.84917	1.53312	-3.81522	0.000136062	0.00184525	N
chr7_42185037_42188067	12.5479	-7.16828	1.88053	-3.81184	0.000137937	0.0018662	Y
chr5_41927115_41930019	12.672	6.6074	1.73531	3.80761	0.000140316	0.00189455	N
chr13_64793357_64819610	8.52836	6.14715	1.61547	3.80518	0.000141704	0.00190942	N
chr13_99500846_99508285	9.63635	-6.8746	1.80754	-3.80328	0.00014279	0.00192019	Y
chr3_195047614_195066046	21.8396	-3.50533	0.923114	-3.79729	0.000146286	0.00196324	N
chr16_70548238_70551643	7.79323	7.2838	1.91856	3.79649	0.000146761	0.00196566	Y
chr1_156303338_156304709	41.8796	1.49251	0.393571	3.79223	0.000149301	0.00199567	Y
chr16_23654276_23672602	10.7157	6.95587	1.83542	3.7898	0.000150769	0.00201125	N
chr10_25226113_25231365	29.5005	2.06278	0.544774	3.78648	0.000152797	0.00203425	Y
chr1_179100446_179102509	81.9576	-1.03989	0.274955	-3.78203	0.000155553	0.00206682	N
chr12_122218778_122219098	22.8367	-3.25466	0.860723	-3.78131	0.000156006	0.00206871	Y
chr8_30557598_30560757	8.74909	-5.69929	1.50748	-3.78068	0.000156401	0.00206984	N
chr4_129919029_129925031	8.64668	-5.82103	1.5408	-3.77793	0.000158134	0.00208862	N
chr1_12638746_12640694	15.4597	-6.80212	1.80103	-3.7768	0.000158858	0.00209007	Y
chr20_33969721_33971936	6.98674	6.49859	1.72067	3.77678	0.00015887	0.00209007	Y
chr20_50329505_50346517	18.6182	-4.17561	1.10726	-3.77111	0.000162526	0.00213395	Y
chr6_158994452_159029782	8.72684	7.38827	1.96063	3.76831	0.000164359	0.00215378	Y
chr16_21623966_21636436	38.0797	-2.37336	0.629926	-3.76769	0.000164768	0.00215491	N
chr5_31448654_31451747	72.5976	1.675	0.44524	3.76201	0.000168552	0.00220008	N
chr1_225195115_225211567	8.25301	6.04089	1.61114	3.74946	0.000177218	0.00230868	N
chr9_94518353_94538100	7.72157	-5.86687	1.56547	-3.74768	0.000178481	0.0023206	N
chr2_10281981_10282502	53.8011	1.8552	0.495116	3.747	0.000178959	0.00232229	Y
chr10_116719485_116734144	22.179	-3.27141	0.873518	-3.7451	0.00018032	0.00233541	N
chr20_30954187_30978970	67.8215	-1.16415	0.311613	-3.73587	0.000187068	0.0024181	Y
chr1_59805630_59812070	38.5608	2.83772	0.762027	3.72391	0.000196157	0.00253069	N
chr17_74763468_74772623	35.468	-2.77063	0.745228	-3.71783	0.000200942	0.00258659	N
chr13_31789188_31803431	69.1727	-1.6179	0.435222	-3.71742	0.000201265	0.00258659	Y
chr10_12123471_12133683	8.04217	-5.82246	1.56811	-3.71304	0.000204787	0.00262678	N
chr9_97054623_97055351	7.50338	6.98298	1.8812	3.71198	0.000205645	0.00263273	Y
chr10_71977568_71978573	8.15045	6.92489	1.86692	3.70925	0.000207874	0.00265617	Y
chr10_4872867_4889491	7.38419	7.20674	1.94367	3.7078	0.000209071	0.00266635	N
chr1_19244856_19246267	64.6699	-1.597	0.43087	-3.70647	0.00021017	0.00267526	Y
chr1_198247091_198266370	9.33203	-5.64602	1.52363	-3.70564	0.000210859	0.00267892	N
chr11_103173822_103187349	14.5095	6.07479	1.64092	3.70207	0.000213844	0.00271167	N
chr19_34685383_34687668	17.5737	-3.57269	0.965656	-3.69976	0.000215805	0.00273135	N
chr10_126185530_126205840	9.71972	5.89402	1.59366	3.69843	0.000216939	0.0027405	N
chr3_57569625_57570191	46.5774	-2.30135	0.623413	-3.69154	0.000222899	0.00281046	N
chr14_31637504_31638674	11.5303	6.54811	1.77423	3.69067	0.000223661	0.00281475	N
chr16_89371614_89379997	9.11276	7.02519	1.90424	3.68925	0.000224918	0.00281994	Y
chr5_138221901_138240130	13.5225	-3.99977	1.08407	-3.6896	0.000224605	0.00281994	Y
chr2_236706403_236715975	49.51	-2.51105	0.681889	-3.68248	0.000230972	0.00289037	N
chr6_84894905_84896341	11.9255	6.58731	1.78905	3.68201	0.000231403	0.00289037	N
chr12_8083076_8084081	8.96979	-6.77218	1.84066	-3.67922	0.000233948	0.00291669	Y
chr16_69729039_69729282	72.0739	-1.27892	0.347762	-3.67758	0.000235454	0.00292454	Y
chr4_151791677_151814301	5.97095	6.7377	1.83209	3.6776	0.000235439	0.00292454	Y
chr2_236791989_236817550	18.1757	-2.88206	0.784028	-3.67597	0.000236945	0.00293759	Y
chr14_69583083_69589077	67.8359	-1.4023	0.381831	-3.67258	0.000240114	0.00296666	Y
chr7_131071879_131084192	95.0988	-1.01972	0.277662	-3.67251	0.000240179	0.00296666	Y
chr3_171965323_171969331	37.0814	-2.20096	0.599433	-3.67173	0.000240915	0.00297025	N
chr7_40037093_40087476	9.79064	-6.05835	1.65207	-3.66712	0.0002453	0.00301873	Y
chr1_225140372_225156576	17.2383	4.64388	1.26817	3.66188	0.000250368	0.00307542	Y
chrX_77270159_77275895	27.9283	2.34354	0.640549	3.65864	0.000253562	0.00310893	Y
chrX_106410879_106418423	7.18567	6.92777	1.89422	3.65731	0.000254877	0.00311932	Y
chr1_175996708_176015460	20.1416	-4.36665	1.19422	-3.65648	0.000255702	0.00312369	N
chr3_11399892_11421526	82.9817	-1.2023	0.32999	-3.64344	0.000269015	0.00328031	Y
chr18_21644104_21649235	325.969	-0.491376	0.135017	-3.63935	0.000273323	0.00332676	N
chr3_149563798_149589941	177.841	-0.664201	0.182542	-3.63861	0.000274109	0.00333025	N
chr16_69189774_69201088	6.84595	6.82737	1.87878	3.63394	0.00027913	0.00338508	Y
chr8_141856359_141900868	270.451	0.678874	0.186854	3.63319	0.000279943	0.00338878	N
chrX_14814282_14815420	14.1917	6.01778	1.65823	3.62903	0.000284488	0.00343757	N
chr3_57875768_57882659	186.368	-0.794778	0.21914	-3.62681	0.000286943	0.00346096	N
chr9_114332371_114348445	21.4169	-5.82224	1.60656	-3.62404	0.000290042	0.00349203	N
chr14_32902666_32903023	10.1625	6.65383	1.83629	3.62352	0.000290617	0.00349264	Y
chr2_113258783_113260758	35.5734	-2.54325	0.702794	-3.61878	0.000296	0.00355093	Y
chr11_31474265_31484852	19.894	3.24954	0.899419	3.61293	0.000302757	0.00361898	Y
chr2_10784446_10808849	41.3067	-1.53056	0.423632	-3.61296	0.000302726	0.00361898	Y
chr7_117825701_117828459	8.29176	-5.8658	1.62794	-3.60321	0.000314311	0.00374367	N
chr11_9225207_9229179	14.6229	-4.2553	1.18088	-3.60351	0.000313951	0.00374367	Y
chr3_195016437_195022903	8.48421	-5.65944	1.57216	-3.59979	0.000318474	0.00378649	N
chr11_72468812_72470426	32.5917	3.19237	0.887295	3.59786	0.00032084	0.00380784	N
chr9_97686268_97718297	9.70946	-5.76873	1.60822	-3.58702	0.000334479	0.00396265	N
chr12_117423011_117426674	157.332	0.700501	0.195318	3.58647	0.000335185	0.00396398	N
chr3_197592294_197602646	84.4435	-1.12855	0.314963	-3.58313	0.000339504	0.00400795	Y
chr14_99723808_99724176	45.8798	6.24866	1.74515	3.58059	0.000342816	0.0040399	Y
chr11_118997645_118997835	9.04878	6.83057	1.90801	3.57995	0.000343654	0.00404264	N
chr16_72122886_72124685	30.9655	2.22192	0.621056	3.57765	0.000346703	0.00407132	Y
chr1_59787208_59844509	6.7977	6.74124	1.8855	3.57531	0.000349818	0.00409895	Y
chr5_142434004_142437312	157.43	1.09396	0.306007	3.57496	0.000350285	0.00409895	Y
chr1_91382197_91383711	184.783	1.07134	0.299881	3.57255	0.00035352	0.00412956	N
chr16_67662273_67663436	59.4365	1.47632	0.413623	3.56925	0.000358007	0.00417466	Y
chr5_72374007_72378652	10.4177	6.63672	1.86381	3.56084	0.000369667	0.00430311	N
chr5_647920_655699	17.9425	3.64524	1.02702	3.54933	0.000386218	0.00448793	N
chr2_9490937_9508648	53.9753	-1.45312	0.409523	-3.54832	0.000387702	0.00449734	Y
chr7_73770740_73771807	106.968	-1.37705	0.388172	-3.54752	0.00038887	0.00450307	Y
chr2_242695264_242698774	6.41796	6.82551	1.92519	3.54536	0.000392077	0.00453233	Y
chr5_135489281_135489852	7.58641	-6.36698	1.7966	-3.5439	0.000394254	0.00454961	N
chr5_167986037_167993271	7.7542	-6.1017	1.72292	-3.54149	0.00039787	0.00458341	Y
chr5_79974746_80057497	19.5409	5.39947	1.52599	3.53834	0.000402649	0.00463046	N
chr22_32044087_32046764	14.4931	-4.017	1.13619	-3.53549	0.000407016	0.00466504	N
chr15_100871094_100874385	9.93785	-6.9202	1.95736	-3.53547	0.000407055	0.00466504	Y
chr6_45399600_45480144	7.9902	-6.60508	1.86875	-3.5345	0.000408553	0.00467419	Y
chr3_154832783_154836600	11.1937	6.35361	1.80035	3.5291	0.000416972	0.00476233	N
chr9_6849507_6893232	58.4712	1.14685	0.325289	3.52563	0.000422484	0.00481704	Y
chr5_78964715_78977884	11.5556	6.1755	1.75384	3.52112	0.000429724	0.00489123	N
chr11_126051390_126052982	6.57017	7.03768	1.99984	3.51912	0.000432988	0.00491999	Y
chr2_206036935_206058044	9.33046	-6.45946	1.83618	-3.51789	0.000434998	0.00493442	Y
chr1_225140372_225195246	41.8027	2.48456	0.70666	3.51592	0.000438238	0.00496273	N
chr20_57242546_57248767	9.14744	6.57075	1.86937	3.51495	0.000439835	0.00497237	Y
chr20_62895782_62899363	6.67082	7.05998	2.01098	3.51071	0.00044691	0.00504381	Y
chr17_34869272_34871833	7.7738	-5.61796	1.60135	-3.50826	0.000451049	0.00508192	N
chr10_70190193_70190417	11.3882	6.49106	1.85256	3.50383	0.000458625	0.00514952	N
chr15_72300167_72320134	51.3274	-1.34224	0.383048	-3.50411	0.000458144	0.00514952	N
chr7_959605_966280	6.66242	7.05822	2.01468	3.5034	0.000459365	0.00514952	Y
chr4_6925100_6969151	177.767	0.835077	0.238479	3.50168	0.000462336	0.00517413	N
chr21_46538479_46548488	24.3643	5.02097	1.43447	3.50022	0.000464879	0.00519387	N
chr5_43675613_43677908	163.343	0.917011	0.262067	3.49915	0.000466739	0.00520594	N
chr3_124560230_124567405	11.6738	-4.23596	1.21189	-3.49533	0.000473479	0.00527229	Y
chr10_69785303_69804320	13.6506	5.67782	1.62735	3.48899	0.000484851	0.00538992	N
chr1_67861088_67865589	7.13142	7.06386	2.02878	3.48183	0.000498001	0.0055269	Y
chr16_70497072_70497677	91.2303	0.931428	0.267567	3.4811	0.000499355	0.00553272	N
chr16_29332249_29339945	7.06021	7.14122	2.0524	3.47946	0.000502434	0.00555761	Y
chr5_130883740_130940386	43.5305	-2.40399	0.692207	-3.47294	0.00051479	0.00568485	N
chr14_76633006_76662315	41.22	-1.62311	0.467482	-3.47202	0.000516562	0.00569499	Y
chr16_89857811_89858955	7.92118	7.19025	2.07181	3.47051	0.000519478	0.00571769	Y
chr3_141272699_141278837	6.54193	-5.75951	1.66055	-3.46843	0.000523504	0.0057525	N
chr5_56152427_56161804	11.7704	-4.75985	1.37359	-3.46526	0.000529726	0.00581131	Y
chrX_76829715_76851255	14.6705	3.75643	1.08639	3.45772	0.00054477	0.00595674	N
chr6_99936076_99958106	6.23099	6.96154	2.01329	3.4578	0.000544615	0.00595674	Y
chr12_14018732_14019160	6.21664	6.95834	2.0139	3.45516	0.000549976	0.00600383	Y
chr18_13666478_13682104	25.3515	-1.84777	0.535086	-3.45323	0.000553921	0.00603702	Y
chr3_136136727_136141886	7.14709	-5.67693	1.64443	-3.45221	0.000556017	0.00604851	N
chr16_8952207_8953192	8.00492	7.23517	2.09604	3.45183	0.000556789	0.00604851	Y
chr5_172359439_172362313	8.85678	-5.66445	1.64189	-3.44995	0.000560694	0.00607869	N
chr7_99621042_99621930	362.587	-0.389412	0.112886	-3.44961	0.000561391	0.00607869	N
chr13_28830429_28835595	40.0788	-2.25954	0.655659	-3.44621	0.000568514	0.00613591	N
chr5_131013396_131044965	13.2566	-4.35285	1.26299	-3.44647	0.000567962	0.00613591	N
chr10_1046617_1053068	5.52436	6.57871	1.90981	3.44469	0.000571724	0.00616058	N
chr2_183993015_183998351	54.0665	1.02921	0.298927	3.443	0.000575297	0.00618908	N
chr7_92921015_92926555	108.291	-1.38004	0.401044	-3.44112	0.000579307	0.00620221	N
chr20_44444180_44444552	24.6855	-1.89568	0.550806	-3.44165	0.000578179	0.00620221	Y
chr3_23541099_23574192	57.1778	-2.23787	0.650293	-3.44134	0.000578851	0.00620221	Y
chr1_46290105_46295253	26.4408	-2.64082	0.768224	-3.43757	0.00058696	0.00627407	N
chr17_80521230_80529746	12.4268	-6.58271	1.91536	-3.43679	0.000588645	0.00628202	N
chr12_106770137_106773917	6.72945	6.6489	1.93838	3.43013	0.000603285	0.00642798	Y
chr4_76898799_76903190	5.90593	6.81796	1.9902	3.42577	0.000613052	0.00652162	Y
chr3_197592294_197598333	18.8381	-3.35369	0.979519	-3.42381	0.000617492	0.00655717	N
chr13_113669077_113699675	6.64422	7.05438	2.06081	3.42311	0.00061908	0.00655717	Y
chr15_90982564_90986710	7.63326	-6.27476	1.83312	-3.423	0.000619343	0.00655717	Y
chr5_10213603_10224173	152.344	2.98387	0.871917	3.42219	0.000621182	0.00656426	N
chr13_22095384_22113827	7.52106	-6.26871	1.83197	-3.42184	0.000621981	0.00656426	Y
chr3_149563798_149613357	7.57532	-5.45266	1.59385	-3.42107	0.000623754	0.00656957	N
chr12_13906251_13906849	6.22907	6.96111	2.03496	3.42076	0.000624454	0.00656957	Y
chr12_46633462_46637097	446.481	0.489283	0.143515	3.40928	0.000651354	0.00683295	N
chr7_156549087_156619438	130.273	-1.34771	0.395317	-3.4092	0.000651538	0.00683295	N
chr1_231506308_231509845	28.0845	-3.03423	0.891139	-3.40489	0.000661916	0.00693089	N
chr16_29917109_29917448	61.0252	-5.77417	1.6969	-3.40277	0.000667063	0.00697384	Y
chr8_11666303_11696082	7.8766	6.68295	1.96557	3.40001	0.000673837	0.00703364	N
chr21_46275125_46281186	92.9207	-1.06596	0.313648	-3.39857	0.00067738	0.00705957	Y
chr19_30471066_30477324	6.47722	6.93613	2.04266	3.39564	0.000684675	0.00712447	Y
chr12_116668238_116675510	60.8571	-1.25399	0.36937	-3.39494	0.000686428	0.00713158	Y
chr13_49761258_49762769	6.77783	6.76159	1.9943	3.39046	0.000697766	0.0072381	Y
chr1_150413399_150416853	10.995	5.91165	1.74612	3.38559	0.000710258	0.00735624	N
chr17_76396816_76397138	8.35838	7.21554	2.13352	3.38199	0.00071962	0.00744165	Y
chr10_134503896_134540409	11.328	5.84211	1.72941	3.3781	0.000729897	0.00753624	N
chr12_50821545_50822873	82.1917	0.794979	0.235384	3.37738	0.000731808	0.0075443	N
chr6_158870028_158873300	30.0329	2.02827	0.600692	3.37655	0.000734002	0.00755523	Y
chr2_220657099_220658892	9.00342	-6.77727	2.00855	-3.37421	0.000740266	0.00760797	Y
chr12_62892699_62895478	11.9636	5.75213	1.70558	3.37253	0.000744797	0.00763102	N
chr19_55610152_55614936	54.8115	1.49938	0.444538	3.37289	0.000743844	0.00763102	Y
chr15_89656956_89659752	470.15	0.494073	0.146603	3.37013	0.00075132	0.00768605	N
chr9_97535284_97563284	8.44513	-6.35372	1.88559	-3.36961	0.000752737	0.00768875	Y
chr2_240066279_240085619	6.67898	6.98363	2.07377	3.36761	0.000758235	0.00773307	Y
chr8_48706851_48710958	6.07484	6.92499	2.05785	3.36516	0.00076498	0.00778712	N
chr9_33953283_33963789	817.639	-0.386754	0.11494	-3.36484	0.00076587	0.00778712	N
chr16_70765398_70778482	6.47179	7.01662	2.08796	3.36052	0.000777972	0.00789814	Y
chr15_81199004_81201647	5.95983	6.89714	2.05287	3.35975	0.000780143	0.00790813	Y
chr2_225400245_225422573	193.864	-0.68498	0.203956	-3.35847	0.000783745	0.00791275	N
chr5_37243115_37247847	12.2763	5.67682	1.68998	3.35911	0.000781936	0.00791275	N
chr1_3496389_3512011	7.73757	-6.55733	1.95256	-3.35833	0.000784157	0.00791275	Y
chr12_7980091_8083238	7.2327	-6.4612	1.92424	-3.35779	0.000785676	0.0079161	Y
chr19_37203288_37203769	21.8358	-1.90443	0.567537	-3.3556	0.000791935	0.00796713	Y
chrX_74965453_74965904	13.1434	4.77029	1.42201	3.35462	0.000794755	0.00798345	Y
chr16_142594_143323	7.26407	6.63692	1.98005	3.35189	0.000802609	0.00801583	N
chr16_792250_792543	302.258	0.921643	0.274965	3.35186	0.000802708	0.00801583	N
chr5_170610203_170632616	99.8553	-1.07711	0.321322	-3.35212	0.000801955	0.00801583	N
chr21_42613746_42622828	7.2351	-6.46167	1.9278	-3.35183	0.000802784	0.00801583	Y
chr17_38652239_38652772	16.0164	-3.13141	0.93526	-3.34818	0.000813452	0.00809012	Y
chr2_242514536_242523001	5.65009	6.82024	2.03692	3.34831	0.000813047	0.00809012	Y
chr21_26793020_26796961	5.77324	6.85158	2.04645	3.34804	0.000813864	0.00809012	Y
chr15_76584772_76588078	42.9843	1.42479	0.425879	3.34554	0.000821232	0.00815121	Y
chr10_94733810_94774024	10.6643	5.88226	1.76072	3.34084	0.000835259	0.00827813	Y
chr15_67984817_67995746	15.4137	-5.79103	1.73474	-3.33826	0.000843035	0.0083428	N
chr13_113669077_113679072	5.90452	6.88416	2.06258	3.33764	0.00084494	0.00834926	Y
chr5_40728447_40730445	95.1242	0.997146	0.29917	3.33304	0.000859034	0.00846346	N
chrX_130883334_130928494	25.9634	1.83832	0.551544	3.33304	0.000859034	0.00846346	Y
chr22_38891801_38895504	4.8915	-5.49111	1.65062	-3.3267	0.000878797	0.00864539	N
chr17_40990748_40991397	8.27587	6.36558	1.91684	3.32087	0.000897386	0.0088023	N
chr1_151288049_151288985	7.58209	-5.62423	1.69354	-3.321	0.000896971	0.0088023	Y
chr4_151719233_151738409	114.467	-0.933855	0.281286	-3.31995	0.000900336	0.00881827	N
chr17_49118862_49133843	140.066	-0.767766	0.231605	-3.31499	0.00091648	0.00896323	N
chr20_34430495_34446303	14.2972	-5.76165	1.74187	-3.30773	0.000940542	0.0091736	N
chr4_85800559_85853516	14.1679	-5.79981	1.75344	-3.30767	0.000940767	0.0091736	N
chr17_34910661_34923615	52.0679	-1.14431	0.345999	-3.30727	0.000942117	0.0091736	Y
chr8_141889570_141900868	137.406	-0.877613	0.265399	-3.30677	0.000943789	0.0091765	N
chr17_76388557_76394432	10.0662	4.05913	1.2287	3.30361	0.000954493	0.00926706	N
chr6_45399600_45405788	30.3163	-8.47833	2.56764	-3.302	0.000959982	0.00930681	Y
chr2_148653870_148657467	69.5755	-1.19528	0.363304	-3.29004	0.00100173	0.0096974	Y
chr10_79741912_79744056	6.99645	6.81235	2.07153	3.28856	0.001007	0.00970798	N
chr12_46339032_46345510	11.2904	-5.08888	1.54734	-3.28879	0.00100617	0.00970798	N
chr3_136162129_136221621	9.34203	-6.49561	1.9757	-3.28774	0.00100994	0.00970798	N
chr21_42609440_42629253	42.4308	-2.597	0.789784	-3.28824	0.00100816	0.00970798	Y
chr3_185316200_185331196	5.36312	6.74493	2.05157	3.2877	0.0010101	0.00970798	Y
chr3_80680382_80683122	34.1758	-1.77897	0.541191	-3.28715	0.00101208	0.00971307	Y
chr16_66632081_66632743	5.62641	6.81441	2.07334	3.28668	0.00101375	0.00971511	Y
chr9_86297866_86301070	104.86	-0.876981	0.267253	-3.28147	0.00103269	0.00986825	N
chr1_214089278_214139601	5.78568	6.85456	2.08871	3.28172	0.00103175	0.00986825	Y
chr2_36596251_36623930	17.3561	-5.47168	1.6679	-3.28058	0.00103595	0.00988528	N
chr7_155295716_155301792	38.6108	1.41694	0.432429	3.27671	0.00105026	0.0100074	Y
chr12_45097509_45108524	6.8581	-6.38374	1.94849	-3.27624	0.00105198	0.0100096	Y
chr10_103783234_103789502	7.33368	6.54843	1.99946	3.2751	0.00105625	0.0100359	N
chr3_18082941_18105554	5.35928	6.74394	2.06146	3.27144	0.00107003	0.0101523	Y
chr5_80419461_80422982	12.7946	5.49226	1.6811	3.26706	0.00108669	0.0102958	N
chr9_102988344_102992109	7.38584	6.34686	1.94309	3.26638	0.00108931	0.010306	N
chr2_32523303_32532259	8.59336	-5.14354	1.57495	-3.26585	0.00109136	0.0103107	N
chr11_62621273_62622688	5.90385	6.47214	1.98219	3.26515	0.00109408	0.0103218	N
chr11_78176922_78204241	83.1222	-0.921429	0.282486	-3.26186	0.00110683	0.0104273	N
chr6_33365806_33366164	7.38527	-6.17826	1.89451	-3.26115	0.00110963	0.0104389	Y
chr16_87760371_87764250	10.2228	7.38132	2.26559	3.25802	0.00112194	0.01054	N
chr2_64083440_64090062	7.6532	-6.31449	1.93998	-3.25492	0.00113423	0.0106404	Y
chr11_121348827_121367758	5.33057	6.73649	2.06997	3.25439	0.00113635	0.0106453	Y
chr6_147581751_147599340	12.1138	5.67258	1.74338	3.25378	0.00113878	0.0106531	N
chr13_111303381_111319820	5.22178	6.70631	2.06135	3.25336	0.00114051	0.0106543	Y
chr14_55462321_55467710	7.31943	6.4473	1.98229	3.25244	0.00114418	0.0106737	N
chr2_242593961_242594758	5.877	6.87762	2.11543	3.25117	0.0011493	0.0107065	Y
chr1_224918164_224922408	5.22489	6.70714	2.0644	3.24895	0.00115831	0.0107753	Y
chr17_60038228_60040332	7.47093	6.35308	1.95591	3.24815	0.00116159	0.0107908	N
chr12_49227060_49228280	6.04539	6.91819	2.13026	3.24758	0.00116391	0.0107974	Y
chr15_65994643_65995346	23.1251	1.63301	0.503161	3.2455	0.00117246	0.0108615	N
chr11_128963516_128994789	39.3802	-2.40033	0.742011	-3.2349	0.00121685	0.0112407	N
chr11_66583524_66595835	17.3854	-3.83727	1.18635	-3.23452	0.00121847	0.0112407	N
chr8_82626153_82630459	10.96	5.64429	1.74473	3.23506	0.00121617	0.0112407	N
chr2_26453060_26457223	7.12143	-6.13214	1.89607	-3.23413	0.00122012	0.0112407	Y
chr1_151630711_151641111	10.0474	5.83834	1.80602	3.23272	0.0012262	0.0112758	N
chr14_69369194_69387842	6.69153	-6.13547	1.89808	-3.23245	0.00122732	0.0112758	Y
chrX_16875717_16881223	11.5614	5.91464	1.83012	3.23183	0.00123	0.0112849	N
chr11_66407149_66407594	37.0467	3.12707	0.967891	3.23081	0.00123438	0.0113095	N
chr5_138614016_138615747	15.9974	-3.28247	1.01632	-3.22977	0.00123891	0.0113354	N
chr9_86292642_86301070	11.0194	-5.94636	1.84545	-3.22216	0.00127227	0.0116247	N
chr5_142421381_142437312	5.36125	6.66643	2.07327	3.21541	0.00130257	0.0118853	Y
chr2_201881714_201887655	6.91457	6.35313	1.97869	3.21077	0.00132379	0.0120624	N
chr3_72873575_72893574	5.5536	-5.09613	1.58911	-3.20691	0.0013417	0.012209	N
chr12_49333438_49334971	49.7874	1.3211	0.412379	3.20361	0.00135714	0.0123326	Y
chr5_72144212_72151750	13.361	5.29526	1.65334	3.20276	0.00136117	0.0123524	N
chr8_98817581_98837381	76.5073	1.132	0.353916	3.19851	0.00138142	0.0125191	N
chr7_943763_959687	4.91972	6.62039	2.07011	3.19808	0.00138347	0.0125207	Y
chrX_62885766_62898452	7.60594	6.395	2.00098	3.19594	0.00139377	0.0125968	N
chr1_1158624_1164326	6.5256	-6.31231	1.97579	-3.19482	0.00139916	0.0126284	Y
chr15_56686363_56687032	80.3922	0.919737	0.287951	3.19407	0.00140282	0.0126443	N
chr17_49118862_49145373	9.08342	-6.39055	2.0013	-3.19319	0.00140709	0.0126486	N
chr6_7176888_7189555	11.8768	-3.67246	1.15009	-3.19319	0.00140708	0.0126486	N
chr15_94039463_94041986	5.16601	6.69143	2.09632	3.19199	0.00141294	0.0126841	Y
chr11_18312989_18313566	72.051	-1.19697	0.375047	-3.19153	0.00141521	0.0126874	N
chr18_74561482_74563895	140.122	0.877145	0.275108	3.18836	0.00143081	0.0128101	N
chr3_119624602_119635021	21.8906	-2.54586	0.799532	-3.18419	0.0014516	0.0129788	N
chr19_56657616_56658577	6.19545	6.95249	2.18561	3.18103	0.00146754	0.0131037	Y
chr16_1859239_1859834	10.0685	-6.2277	1.95834	-3.18009	0.00147231	0.013115	N
chr6_101214441_101215221	5.83811	-5.42064	1.7046	-3.18	0.00147274	0.013115	N
chr5_65284463_65290692	705.855	-0.505877	0.15919	-3.17782	0.00148385	0.0131964	N
chr16_71748415_71748704	9.10651	6.19219	1.95004	3.17541	0.00149625	0.013289	N
chr11_76670023_76709865	10.5213	5.49753	1.73199	3.17411	0.00150294	0.0133306	N
chr12_22637631_22643152	8.6078	6.14653	1.93801	3.17156	0.00151621	0.0134278	N
chr20_18491466_18492926	7.87003	6.10543	1.92546	3.17089	0.00151973	0.0134278	N
chr8_144547887_144557755	8.05147	6.29924	1.98661	3.17085	0.00151994	0.0134278	N
chr15_80762559_80767564	4.75397	6.57116	2.07306	3.16978	0.00152554	0.0134594	Y
chr17_76411033_76415806	6.983	6.34072	2.00189	3.16737	0.00153824	0.0135536	N
chr9_96238538_96261168	55.0897	-1.1411	0.360358	-3.16658	0.00154245	0.0135728	N
chr2_240944627_240946787	7.03968	6.38682	2.01724	3.16611	0.0015449	0.0135764	N
chr18_59739906_59763183	27.0228	1.85471	0.58625	3.16368	0.00155789	0.0136725	N
chr10_116879949_116931050	8.96827	-6.32578	2.00013	-3.16269	0.0015632	0.0137011	N
chr3_183361268_183382827	4.20035	-5.28202	1.67103	-3.16094	0.00157263	0.0137657	N
chr8_100182267_100205285	14.0975	5.16907	1.6361	3.15939	0.00158099	0.0138207	N
chr15_50330965_50399205	10.6579	5.49591	1.74038	3.15788	0.00158923	0.0138746	N
chr2_62227836_62228117	19.6572	-3.0603	0.969883	-3.15533	0.00160314	0.0139742	N
chr6_90458942_90460251	4.72641	6.4794	2.05417	3.15427	0.00160902	0.0139742	N
chr8_124349865_124351686	82.4542	0.827897	0.26246	3.15438	0.0016084	0.0139742	N
chr8_128981662_129001537	8.16167	-6.51409	2.06509	-3.15439	0.00160835	0.0139742	Y
chr17_76823327_76825089	6.86831	6.08332	1.92969	3.15248	0.0016189	0.0140417	N
chr14_90397885_90398971	47.9156	-1.51784	0.481602	-3.15164	0.00162356	0.0140456	N
chr13_99573208_99575625	8.6679	-6.57418	2.08583	-3.15182	0.00162255	0.0140456	Y
chr8_99718695_99719539	624.41	0.676685	0.214762	3.15086	0.0016279	0.0140649	N
chr9_140348183_140350938	7.62389	-6.5359	2.07459	-3.15045	0.00163018	0.0140663	Y
chr9_103065914_103072661	9.31704	7.17508	2.27909	3.14822	0.00164266	0.0141558	Y
chr1_48821342_48825442	44.2946	4.47468	1.42355	3.14332	0.00167043	0.0143765	N
chr1_144921835_144922638	7.56633	-6.02915	1.91838	-3.14283	0.00167321	0.0143818	NA
chr1_6007164_6012896	17.5892	3.35203	1.06711	3.1412	0.00168255	0.0144435	N
chr1_21091870_21100103	39.4934	-1.58396	0.504562	-3.13928	0.00169361	0.0145198	N
chr7_83758439_83823984	4.90272	6.61559	2.10834	3.13783	0.00170205	0.0145734	Y
chr14_39562391_39565343	6.87134	6.11388	1.95266	3.13105	0.00174183	0.0148598	N
chr14_50136242_50141145	54.4179	2.28227	0.728799	3.13155	0.00173885	0.0148598	N
chr2_230633332_230636348	32.1409	2.47011	0.788922	3.13099	0.00174218	0.0148598	N
chr3_33725851_33738425	109.467	0.998173	0.318951	3.12954	0.00175078	0.014914	N
chr5_170305101_170319557	11.7752	-5.83765	1.86801	-3.12506	0.00177769	0.015124	N
chr12_122734418_122735646	10.2092	5.54724	1.77593	3.12357	0.0017867	0.0151812	N
chr1_219963690_219965397	6.23673	-6.24755	2.00071	-3.12267	0.00179219	0.0152086	Y
chr1_94140170_94140497	35.625	-2.03429	0.651748	-3.12128	0.00180067	0.0152417	Y
chr4_48552609_48553595	6.1153	-6.15436	1.97162	-3.12147	0.00179949	0.0152417	Y
chr6_111281617_111283708	5.01461	6.64855	2.13074	3.1203	0.00180664	0.0152729	Y
chr14_50666409_50671127	15.5844	-5.11851	1.64199	-3.11725	0.00182545	0.0154124	N
chr18_21776089_21819346	6.73451	-5.96161	1.91412	-3.11454	0.00184233	0.0155352	Y
chr4_174213259_174225269	6.29287	6.97629	2.24019	3.11415	0.00184478	0.0155363	Y
chr1_231084645_231097049	4.46699	6.48119	2.08254	3.11216	0.00185724	0.0156172	N
chr6_150157221_150174296	9.23845	-6.24474	2.00675	-3.11187	0.00185908	0.0156172	N
chr9_99083280_99084362	4.72645	6.56313	2.11055	3.10967	0.00187296	0.015714	Y
chr2_61552510_61561106	5.61748	-5.06896	1.63056	-3.10872	0.00187898	0.015725	N
chr6_114274441_114277315	5.89316	6.73808	2.16726	3.10903	0.00187702	0.015725	Y
chr16_68900982_68914533	20.1912	3.47133	1.11758	3.1061	0.0018957	0.015845	N
chr7_42079637_42088295	5.46271	-6.0081	1.9346	-3.1056	0.00189895	0.0158523	Y
chr8_66534498_66539668	6.61984	6.2134	2.00134	3.10462	0.00190525	0.015885	N
chr7_83739786_83823984	4.64016	6.53573	2.10684	3.10215	0.00192121	0.0159981	Y
chrX_154018229_154020560	14.5496	-3.34169	1.07791	-3.10015	0.00193425	0.0160866	N
chr15_35224519_35231014	7.58165	5.9149	1.90838	3.09943	0.0019389	0.0161052	N
chr5_170585338_170597207	14.1757	-3.34804	1.08068	-3.09809	0.0019477	0.0161257	N
chr5_138117612_138163407	6.10896	-6.15392	1.98645	-3.09795	0.00194863	0.0161257	Y
chr6_168910595_168949883	4.61025	6.52681	2.10673	3.09807	0.00194784	0.0161257	Y
chr3_27453133_27465643	29.0831	2.40514	0.777244	3.09444	0.00197184	0.0162774	N
chr6_139264650_139265759	73.4809	0.924253	0.298658	3.09469	0.00197019	0.0162774	N
chr9_4823531_4827033	6.44901	6.14646	1.98878	3.09056	0.00199778	0.0164712	N
chr16_74982417_74990508	5.62386	6.49908	2.10361	3.0895	0.00200497	0.01651	N
chr3_136191255_136221621	6.76306	6.1952	2.00762	3.08584	0.00202979	0.0166938	N
chr1_156286957_156287338	6.4648	6.84775	2.21941	3.08539	0.00203283	0.0166983	N
chr16_53301206_53302038	7.69692	6.18656	2.00567	3.08454	0.0020387	0.0167116	N
chr3_196778448_196796131	6.49821	-6.22564	2.01859	-3.08416	0.0020413	0.0167116	Y
chrX_147013944_147014282	8.36881	-6.04145	1.95893	-3.08406	0.00204197	0.0167116	Y
chr6_168944305_168999684	4.44185	6.4734	2.09977	3.08291	0.00204984	0.016735	N
chr7_155465561_155473602	428.42	0.667934	0.216637	3.08319	0.00204795	0.016735	N
chr1_27269151_27269556	11.3453	3.41179	1.1083	3.07839	0.00208126	0.0169344	N
chr12_27786295_27788048	20.7136	-2.50981	0.815323	-3.07829	0.00208189	0.0169344	N
chr16_16108348_16110478	8.5425	5.6386	1.83145	3.07876	0.00207861	0.0169344	N
chr1_1192372_1192690	74.8244	1.16782	0.379428	3.07784	0.00208508	0.0169397	N
chr22_46493806_46494438	6.70076	6.11515	1.98759	3.07667	0.00209326	0.0169855	N
chr19_40747845_40748594	10.9231	3.70403	1.20408	3.07623	0.00209634	0.0169897	N
chr11_33307959_33308498	13.982	-3.60602	1.17241	-3.07574	0.00209978	0.016997	N
chr7_128622302_128633968	5.62555	-5.81496	1.89161	-3.07407	0.00211157	0.0170717	N
chr19_18650181_18650530	73.8062	1.05143	0.342442	3.07037	0.00213792	0.0172638	N
chr17_76388557_76400170	4.43372	6.47087	2.10877	3.06855	0.00215102	0.0173486	N
chr17_1746097_1756483	104.63	0.629002	0.205025	3.06793	0.00215547	0.0173635	N
chr12_12788711_12788908	16.8269	3.34628	1.0918	3.06493	0.00217718	0.0175172	N
chr1_36814371_36823872	12.1766	-3.77742	1.23321	-3.06309	0.00219065	0.0176044	N
chr1_214139414_214141405	4.57003	6.51469	2.12757	3.06203	0.00219844	0.0176457	Y
chr18_20814572_20817209	20.5219	3.38255	1.10499	3.06115	0.00220489	0.0176762	N
chr13_42439872_42461497	7.19403	-6.34307	2.07292	-3.05997	0.00221356	0.0177244	Y
chr11_33307959_33350179	6.10171	-5.82288	1.90446	-3.05749	0.00223199	0.0178506	N
chr1_94360170_94363454	25.5485	-2.61551	0.855661	-3.05672	0.00223775	0.0178752	N
chr3_186522066_186522513	8.07871	6.50845	2.1313	3.05375	0.00226	0.0180313	N
chr17_55974637_55974865	7.53547	-6.06857	1.98778	-3.05293	0.00226618	0.0180591	Y
chr13_79951514_79953042	7.0549	6.11035	2.00266	3.05111	0.00227999	0.0181189	N
chr14_51259430_51288795	8.42914	-6.01823	1.97248	-3.0511	0.00228008	0.0181189	N
chr14_69919958_69922583	7.64612	5.91363	1.93835	3.05086	0.00228185	0.0181189	N
chr17_76410960_76415756	4.42558	6.46833	2.12168	3.04869	0.00229843	0.0182289	N
chr1_22404922_22413359	163.074	0.953597	0.313135	3.04532	0.00232431	0.0184123	N
chr17_19843026_19850818	8.37021	5.83585	1.9169	3.04442	0.00233129	0.0184456	N
chr1_51001041_51061888	29.1071	1.71385	0.563291	3.04256	0.00234578	0.0185383	Y
chr1_94953098_94956803	58.2089	1.59247	0.523987	3.03915	0.00237249	0.0187272	N
chr7_100417179_100417918	7.60137	-6.42247	2.11467	-3.0371	0.00238867	0.0188327	Y
chr1_101379219_101387397	21.3421	1.64016	0.540647	3.0337	0.00241572	0.0190235	N
chr10_76978821_76979114	43.892	1.38875	0.458061	3.0318	0.002431	0.0190987	N
chr7_99952766_99953427	137.739	-1.12512	0.371089	-3.03194	0.00242986	0.0190987	N
chr4_140058784_140060651	37.8066	-6.26276	2.06698	-3.02991	0.00244628	0.0191961	N
chr3_63898264_63898901	114.703	0.875523	0.289345	3.02588	0.00247913	0.019431	N
chr17_73204622_73214401	6.14002	5.95788	1.96995	3.02438	0.00249145	0.0194818	N
chr8_70667659_70674110	4.89987	6.61479	2.18707	3.0245	0.00249043	0.0194818	Y
chr6_45399600_45410930	5.77574	-6.13634	2.02926	-3.02392	0.00249519	0.0194882	Y
chr16_28123138_28137169	8.87278	7.01033	2.31894	3.02308	0.00250218	0.0195199	Y
[truncated: 6,232 more rows]

## Sheet: Overlap
	log2FoldChange			pvalue			padj			DE in Jiang et al., 2018 (Y=yes, N=no)
[truncated: 7,088 more rows]
