# Supplementary material for: Docker4Circ: A Framework for the Reproducible Characterization of circRNAs from RNA-Seq Data
Source: Int J Mol Sci. 2019 Dec 31;21(1):293. doi: 10.3390/ijms21010293 (PMC6982331; doi:10.3390/ijms21010293)
Supplement: Supplementary file 1 [file ijms-21-00293-s001.zip › Supplementary_Table_8_Quantification_and_DESeq2_results.xlsx]

## Sheet: A_DE_analysis_CRC_tissue
	Average normalized reads (log2)		DESeq 2 result			log2 normalized read counts
ID	NCM	CRC	log2FoldChange	pvalue	padj	SRR6067729_N	SRR6067731_N	SRR6067733_N	SRR6067723_C	SRR6067725_C	SRR6067727_C
chr1_10032076_10041228	0	0.432813	0.157357	0.843372	0.995233	0	0	0	1.29844	0	0
chr1_100459093_100464971	0.718636	0.404115	-0.49251	0.602526	0.995233	2.15591	0	0	0	0	1.21235
chr1_100515465_100535241	0	0.65686	0.38901	0.639658	0.995233	0	0	0	1.97058	0	0
chr1_100661770_100672192	0	0	NA	NA	NA	0	0	0	0	0	0
chr1_101372408_101387397	0	0	NA	NA	NA	0	0	0	0	0	0
chr1_101379219_101387397	0	0	NA	NA	NA	0	0	0	0	0	0
chr1_10155519_10165802	0.330335	0.524411	0.124889	0.887565	0.995233	0.991005	0	0	0	0	1.57323
chr1_10161166_10179671	0.330335	0.432813	-0.13101	0.877001	0.995233	0.991005	0	0	1.29844	0	0
chr1_10327438_10328321	0.330335	0	-0.340494	0.669749	0.995233	0.991005	0	0	0	0	0
chr1_10500404_10502498	0.437042	1.13346	0.506122	0.608659	0.995233	1.31113	0	0	1.29844	0	2.10194
chr1_10527247_10529395	0.451262	0.850989	0.303565	0.755499	0.995233	0.578972	0.774815	0	0	1.34062	1.21235
chr1_108690901_108703915	0	0	NA	NA	NA	0	0	0	0	0	0
chr1_108697605_108728576	0	0	NA	NA	NA	0	0	0	0	0	0
chr1_108724563_108728576	0	0	NA	NA	NA	0	0	0	0	0	0
chr1_108724563_108738102	0	0	NA	NA	NA	0	0	0	0	0	0
chr1_109200073_109202584	0	0	NA	NA	NA	0	0	0	0	0	0
chr1_109294879_109302707	0	0	NA	NA	NA	0	0	0	0	0	0
chr1_109439486_109446876	0	0	NA	NA	NA	0	0	0	0	0	0
chr1_109878862_109888500	1.33554	2.20045	0.320135	0.737816	0.995233	3.23179	0.774815	0	2.42731	0.820731	3.35332
chr1_109883346_109888500	0	0	NA	NA	NA	0	0	0	0	0	0
chr1_109883346_109888503	1.19456	1.85531	0.550152	0.575006	0.995233	2.30751	1.27616	0	2.77368	0	2.79226
chr1_109884636_109888500	0	0	NA	NA	NA	0	0	0	0	0	0
chr1_109884636_109888503	0	0.273577	0.157357	0.843372	0.995233	0	0	0	0	0.820731	0
chr1_110203787_110233186	4.85636	4.75599	-0.315753	0.639194	0.995233	5.3747	5.53923	3.65515	4.84463	4.87544	4.54791
chr1_11076901_11078930	1.32045	2.71098	0.853636	0.353225	0.995233	2.68518	1.27616	0	3.48767	1.72199	2.92328
chr1_11130957_11137005	0	0	NA	NA	NA	0	0	0	0	0	0
chr1_11133991_11137005	0	0	NA	NA	NA	0	0	0	0	0	0
chr1_111690264_111717585	0.192991	0	-0.213771	0.788477	0.995233	0.578972	0	0	0	0	0
chr1_11181303_11182183	0	0	NA	NA	NA	0	0	0	0	0	0
chr1_113153463_113159517	0	0	NA	NA	NA	0	0	0	0	0	0
chr1_113196220_113202401	0.192991	0.243313	-0.0120842	0.987921	0.995233	0.578972	0	0	0	0	0.72994
chr1_114214356_114216087	0	0	NA	NA	NA	0	0	0	0	0	0
chr1_114367764_114377061	0	0	NA	NA	NA	0	0	0	0	0	0
chr1_114372214_114377061	0	0	NA	NA	NA	0	0	0	0	0	0
chr1_114391162_114397671	0	0	NA	NA	NA	0	0	0	0	0	0
chr1_115005726_115006178	0	0	NA	NA	NA	0	0	0	0	0	0
chr1_115005726_115007010	0	0	NA	NA	NA	0	0	0	0	0	0
chr1_1158624_1159348	0	0	NA	NA	NA	0	0	0	0	0	0
chr1_1158624_1164326	0	0	NA	NA	NA	0	0	0	0	0	0
chr1_116202262_116206889	0	0	NA	NA	NA	0	0	0	0	0	0
chr1_116562203_116563506	0	0.809102	0.727336	0.419488	0.995233	0	0	0	2.42731	0	0
chr1_116576379_116580009	0	0.273577	0.157357	0.843372	0.995233	0	0	0	0	0.820731	0
chr1_117944808_117963271	0.192991	0.676127	0.222667	0.802837	0.995233	0.578972	0	0	1.29844	0	0.72994
chr1_117944808_117984947	0	0	NA	NA	NA	0	0	0	0	0	0
chr1_117957335_117984947	0	0	NA	NA	NA	0	0	0	0	0	0
chr1_118035769_118045592	0	0	NA	NA	NA	0	0	0	0	0	0
chr1_118449128_118461358	0	0	NA	NA	NA	0	0	0	0	0	0
chr1_118454616_118461358	0.524319	0.949704	0.0465022	0.962317	0.995233	1.57296	0	0	1.29844	0.820731	0.72994
chr1_1191425_1203372	0	0	NA	NA	NA	0	0	0	0	0	0
chr1_1192372_1192690	0	0	NA	NA	NA	0	0	0	0	0	0
chr1_1192372_1203372	0	0	NA	NA	NA	0	0	0	0	0	0
chr1_119805525_119820595	0	0	NA	NA	NA	0	0	0	0	0	0
chr1_12359259_12368698	0	0	NA	NA	NA	0	0	0	0	0	0
chr1_12460238_12476880	0.524319	0.836928	0.0297181	0.975502	0.995233	1.57296	0	0	1.29844	0	1.21235
chr1_12475140_12476880	0.856647	2.21645	0.634586	0.517495	0.995233	2.56994	0	0	3.05279	2.02333	1.57323
chr1_12638746_12639440	0	0.273577	0.157357	0.843372	0.995233	0	0	0	0	0.820731	0
chr1_12638746_12640694	0	0	NA	NA	NA	0	0	0	0	0	0
chr1_1417518_1454370	1.6745	3.01147	0.568239	0.520391	0.995233	3.376	1.6475	0	2.42731	3.34988	3.25722
chr1_144595835_144596473	4.97115	2.78706	-1.86602	0.015518	0.995233	4.26829	4.28431	6.36085	1.29844	3.45443	3.6083
chr1_144921835_144922638	0	0	NA	NA	NA	0	0	0	0	0	0
chr1_145592633_145595220	0.977857	1.19885	0.150701	0.88068	0.995233	0.991005	1.94256	0	0	2.02333	1.57323
chr1_145646115_145663367	0	0	NA	NA	NA	0	0	0	0	0	0
chr1_146724278_146731572	0.662162	2.07302	0.908777	0.360072	0.995233	1.98649	0	0	1.29844	2.27247	2.64813
chr1_146757975_146759412	0	0	NA	NA	NA	0	0	0	0	0	0
chr1_1499985_1500296	0	0	NA	NA	NA	0	0	0	0	0	0
chr1_150202906_150204264	0	0	NA	NA	NA	0	0	0	0	0	0
chr1_150413399_150416853	0	0	NA	NA	NA	0	0	0	0	0	0
chr1_150429764_150430046	0	0	NA	NA	NA	0	0	0	0	0	0
chr1_150634290_150636239	0.718636	2.5742	1.34542	0.164533	0.995233	2.15591	0	0	2.77368	1.34062	3.6083
chr1_150902443_150913904	0.695314	0.930437	0.127771	0.897787	0.995233	1.31113	0.774815	0	1.97058	0.820731	0
chr1_150997087_150998149	0.192991	0	-0.213771	0.788477	0.995233	0.578972	0	0	0	0	0
chr1_150997087_150999803	0	0	NA	NA	NA	0	0	0	0	0	0
chr1_150999709_151001420	0	0	NA	NA	NA	0	0	0	0	0	0
chr1_151139410_151139890	0	0	NA	NA	NA	0	0	0	0	0	0
chr1_151209034_151209239	0	0	NA	NA	NA	0	0	0	0	0	0
chr1_151214599_151215043	0	0	NA	NA	NA	0	0	0	0	0	0
chr1_151288049_151288985	0	0	NA	NA	NA	0	0	0	0	0	0
chr1_151611364_151611595	0	0	NA	NA	NA	0	0	0	0	0	0
chr1_151611364_151641111	0	0	NA	NA	NA	0	0	0	0	0	0
chr1_151630711_151641111	0	0	NA	NA	NA	0	0	0	0	0	0
chr1_151630711_151655921	0	0.243313	0.157357	0.843372	0.995233	0	0	0	0	0	0.72994
chr1_152287100_152307915	0	0	NA	NA	NA	0	0	0	0	0	0
chr1_152287382_152307915	0	0	NA	NA	NA	0	0	0	0	0	0
chr1_153524495_153532853	3.13229	2.32416	-0.520817	0.538733	0.995233	3.23179	2.88728	3.27779	3.48767	2.27247	1.21235
chr1_153637696_153641033	1.60047	3.7466	1.29105	0.123328	0.995233	3.15389	1.6475	0	3.82137	3.81015	3.6083
chr1_153727118_153730239	0	0	NA	NA	NA	0	0	0	0	0	0
chr1_153791267_153792211	0	0	NA	NA	NA	0	0	0	0	0	0
chr1_154213989_154218851	0.437042	2.06045	1.38126	0.165525	0.995233	1.31113	0	0	3.05279	0.820731	2.30784
chr1_155322497_155324421	0	0	NA	NA	NA	0	0	0	0	0	0
chr1_155377933_155385714	0	0	NA	NA	NA	0	0	0	0	0	0
chr1_155408118_155429689	0	0	NA	NA	NA	0	0	0	0	0	0
chr1_155640111_155644887	0.76917	2.33587	0.825163	0.399466	0.995233	2.30751	0	0	2.42731	2.27247	2.30784
chr1_155644801_155649303	0	0	NA	NA	NA	0	0	0	0	0	0
chr1_155646339_155649303	0	0	NA	NA	NA	0	0	0	0	0	0
chr1_155646339_155650247	0	0	NA	NA	NA	0	0	0	0	0	0
chr1_155646339_155753880	0	0	NA	NA	NA	0	0	0	0	0	0
chr1_155686797_155695810	0	0	NA	NA	NA	0	0	0	0	0	0
chr1_155691308_155695810	0	0	NA	NA	NA	0	0	0	0	0	0
chr1_155695173_155695810	0	0	NA	NA	NA	0	0	0	0	0	0
chr1_155747413_155753880	0	0	NA	NA	NA	0	0	0	0	0	0
chr1_155783425_155784240	0	0	NA	NA	NA	0	0	0	0	0	0
chr1_155823067_155823597	0	0	NA	NA	NA	0	0	0	0	0	0
chr1_155891166_155891709	0.524319	0.404115	-0.218798	0.807691	0.995233	1.57296	0	0	0	0	1.21235
chr1_155895423_155896947	0	0	NA	NA	NA	0	0	0	0	0	0
chr1_155896467_155896947	0.856647	1.85141	0.251654	0.800288	0.995233	2.56994	0	0	1.97058	1.72199	1.86167
chr1_155927504_155928187	0	0	NA	NA	NA	0	0	0	0	0	0
chr1_156169626_156170263	0.524319	1.11051	0.190462	0.847962	0.995233	1.57296	0	0	1.29844	0.820731	1.21235
chr1_156202111_156203519	0	0	NA	NA	NA	0	0	0	0	0	0
chr1_156286957_156287338	0	0	NA	NA	NA	0	0	0	0	0	0
chr1_156290630_156304709	0	0	NA	NA	NA	0	0	0	0	0	0
chr1_156303338_156304709	0	0	NA	NA	NA	0	0	0	0	0	0
chr1_156303338_156305679	0	0	NA	NA	NA	0	0	0	0	0	0
chr1_156921365_156925591	0.856647	0.432813	-0.750298	0.440045	0.995233	2.56994	0	0	1.29844	0	0
chr1_15860732_15874923	0	0.243313	0.157357	0.843372	0.995233	0	0	0	0	0	0.72994
chr1_15964802_15970145	0.330335	0.273577	-0.121722	0.879417	0.995233	0.991005	0	0	0	0.820731	0
chr1_15970017_15976318	0	0.273577	0.157357	0.843372	0.995233	0	0	0	0	0.820731	0
chr1_159888553_159890327	0	0	NA	NA	NA	0	0	0	0	0	0
chr1_1599766_1671143	0	0	NA	NA	NA	0	0	0	0	0	0
chr1_1601103_1666274	0	0	NA	NA	NA	0	0	0	0	0	0
chr1_160293221_160302347	0	0	NA	NA	NA	0	0	0	0	0	0
chr1_16044388_16047883	0	0	NA	NA	NA	0	0	0	0	0	0
chr1_161071838_161072165	0	0	NA	NA	NA	0	0	0	0	0	0
chr1_16116601_16123438	0	0	NA	NA	NA	0	0	0	0	0	0
chr1_16119332_16123438	0	0	NA	NA	NA	0	0	0	0	0	0
chr1_161748034_161753886	0	0	NA	NA	NA	0	0	0	0	0	0
chr1_16237596_16242774	0	0	NA	NA	NA	0	0	0	0	0	0
chr1_162535802_162536138	1.50265	3.32464	1.0141	0.248754	0.995233	3.23179	1.27616	0	3.66414	2.48486	3.82491
chr1_16464348_16464925	0	0	NA	NA	NA	0	0	0	0	0	0
chr1_16474873_16475542	0	0	NA	NA	NA	0	0	0	0	0	0
chr1_16490966_16494748	0	0.65686	0.38901	0.639658	0.995233	0	0	0	1.97058	0	0
chr1_16528277_16529069	0	0	NA	NA	NA	0	0	0	0	0	0
chr1_165648679_165652347	0	0	NA	NA	NA	0	0	0	0	0	0
chr1_165649724_165664634	0	0	NA	NA	NA	0	0	0	0	0	0
chr1_167734820_167742605	0	0	NA	NA	NA	0	0	0	0	0	0
chr1_167734820_167745403	0	0	NA	NA	NA	0	0	0	0	0	0
chr1_167741512_167745403	0	0	NA	NA	NA	0	0	0	0	0	0
chr1_167921038_167944253	0	0	NA	NA	NA	0	0	0	0	0	0
chr1_167935867_167944253	0	0	NA	NA	NA	0	0	0	0	0	0
chr1_167971720_167974031	0	0	NA	NA	NA	0	0	0	0	0	0
chr1_168200752_168208398	0.782591	0.620557	-0.0821005	0.933173	0.995233	1.57296	0.774815	0	0	0	1.86167
chr1_169199956_169256646	0	0	NA	NA	NA	0	0	0	0	0	0
chr1_169446393_169446995	0	0	NA	NA	NA	0	0	0	0	0	0
chr1_169947226_170001116	0	0	NA	NA	NA	0	0	0	0	0	0
chr1_171492360_171496983	0	0	NA	NA	NA	0	0	0	0	0	0
chr1_171537386_171544267	0.856647	1.7624	0.31771	0.749889	0.995233	2.56994	0	0	1.29844	1.34062	2.64813
chr1_1724684_1749314	0	0	NA	NA	NA	0	0	0	0	0	0
chr1_172520652_172526934	0	0	NA	NA	NA	0	0	0	0	0	0
chr1_172525009_172526934	0.192991	0	-0.213771	0.788477	0.995233	0.578972	0	0	0	0	0
chr1_172569204_172571927	0.330335	1.40704	0.8298	0.406946	0.995233	0.991005	0	0	1.29844	0.820731	2.10194
chr1_1735858_1737977	1.30957	2.03038	0.0393944	0.967315	0.995233	3.15389	0.774815	0	1.29844	2.48486	2.30784
chr1_1735858_1749314	0	0	NA	NA	NA	0	0	0	0	0	0
chr1_173702852_173703425	0.598163	0.676127	-0.221597	0.81783	0.995233	1.79449	0	0	1.29844	0	0.72994
chr1_173725062_173726298	0.192991	0.51689	0.160116	0.850099	0.995233	0.578972	0	0	0	0.820731	0.72994
chr1_1737914_1756921	1.4862	2.79436	0.393906	0.669346	0.995233	3.68379	0.774815	0	3.05279	1.72199	3.6083
chr1_173961893_173962273	0	0	NA	NA	NA	0	0	0	0	0	0
chr1_174188263_174200493	0.192991	0	-0.213771	0.788477	0.995233	0.578972	0	0	0	0	0
chr1_1747195_1756938	2.31017	3.7024	0.54216	0.523155	0.995233	4.19239	0.774815	1.96331	3.48767	3.7291	3.89044
chr1_175956079_175958615	0	0	NA	NA	NA	0	0	0	0	0	0
chr1_175996708_176015460	0	0	NA	NA	NA	0	0	0	0	0	0
chr1_176050288_176085817	0	0	NA	NA	NA	0	0	0	0	0	0
chr1_176050288_176104222	0	0	NA	NA	NA	0	0	0	0	0	0
chr1_176050288_176105683	0	0	NA	NA	NA	0	0	0	0	0	0
chr1_176050288_176118210	0	0	NA	NA	NA	0	0	0	0	0	0
chr1_176118142_176133027	0	0	NA	NA	NA	0	0	0	0	0	0
chr1_176118142_176145143	0	0	NA	NA	NA	0	0	0	0	0	0
chr1_176118142_176153828	0	0	NA	NA	NA	0	0	0	0	0	0
chr1_176132005_176133027	0	0	NA	NA	NA	0	0	0	0	0	0
chr1_176132005_176145143	0	0	NA	NA	NA	0	0	0	0	0	0
chr1_176132005_176153828	0	0	NA	NA	NA	0	0	0	0	0	0
chr1_178252699_178269253	0	0	NA	NA	NA	0	0	0	0	0	0
chr1_178745817_178754742	0.330335	0.836928	0.266018	0.778138	0.995233	0.991005	0	0	1.29844	0	1.21235
chr1_178777180_178802685	0	0	NA	NA	NA	0	0	0	0	0	0
chr1_179012850_179023773	0.330335	0.65686	0.230563	0.801435	0.995233	0.991005	0	0	1.97058	0	0
chr1_179033062_179033631	0.524319	0.432813	-0.310085	0.73107	0.995233	1.57296	0	0	1.29844	0	0
chr1_179033062_179035994	0	0	NA	NA	NA	0	0	0	0	0	0
chr1_179054763_179057224	0.718636	0.900173	-0.120054	0.903685	0.995233	2.15591	0	0	1.97058	0	0.72994
chr1_179089325_179091002	0	0	NA	NA	NA	0	0	0	0	0	0
chr1_179100446_179102509	0	0	NA	NA	NA	0	0	0	0	0	0
chr1_179271812_179276351	0	0	NA	NA	NA	0	0	0	0	0	0
chr1_179955304_179961356	0	0	NA	NA	NA	0	0	0	0	0	0
chr1_179959642_179961356	0	0	NA	NA	NA	0	0	0	0	0	0
chr1_179972309_179975702	0	0.432813	0.157357	0.843372	0.995233	0	0	0	1.29844	0	0
chr1_180047598_180049796	0.192991	0.900173	0.55192	0.560991	0.995233	0.578972	0	0	1.97058	0	0.72994
chr1_180366651_180382606	0	0	NA	NA	NA	0	0	0	0	0	0
chr1_180793889_180794480	0	0	NA	NA	NA	0	0	0	0	0	0
chr1_180953813_180962561	0	0	NA	NA	NA	0	0	0	0	0	0
chr1_180953813_180974599	0.330335	1.66009	1.0498	0.29608	0.995233	0.991005	0	0	2.42731	1.34062	1.21235
chr1_180971742_180974599	0	0	NA	NA	NA	0	0	0	0	0	0
chr1_182811680_182812569	0	0	NA	NA	NA	0	0	0	0	0	0
chr1_183083666_183084772	0	0	NA	NA	NA	0	0	0	0	0	0
chr1_183481972_183486955	0	0	NA	NA	NA	0	0	0	0	0	0
chr1_185056684_185060871	0.598163	1.4041	0.339821	0.734998	0.995233	1.79449	0	0	1.29844	1.34062	1.57323
chr1_185183639_185200840	0	0.432813	0.157357	0.843372	0.995233	0	0	0	1.29844	0	0
chr1_19244856_19246267	0	0	NA	NA	NA	0	0	0	0	0	0
chr1_192997215_192998787	0.814894	2.15213	0.691008	0.482964	0.995233	2.44468	0	0	1.29844	2.66996	2.488
chr1_193044950_193046180	0.192991	0.676127	0.222667	0.802837	0.995233	0.578972	0	0	1.29844	0	0.72994
chr1_193065778_193070334	2.54568	2.85648	0.28139	0.740017	0.995233	1.79449	2.1874	3.65515	2.42731	3.34988	2.79226
chr1_193202123_193205486	0.718636	1.69972	0.481461	0.630838	0.995233	2.15591	0	0	1.97058	0.820731	2.30784
chr1_197552282_197586889	0	0	NA	NA	NA	0	0	0	0	0	0
chr1_197552282_197614873	0	0	NA	NA	NA	0	0	0	0	0	0
chr1_197564338_197586889	0	0	NA	NA	NA	0	0	0	0	0	0
chr1_197611841_197627499	0	0	NA	NA	NA	0	0	0	0	0	0
chr1_197611841_197643299	0	0	NA	NA	NA	0	0	0	0	0	0
chr1_197611841_197684204	0.192991	0.243313	-0.0120842	0.987921	0.995233	0.578972	0	0	0	0	0.72994
chr1_197611841_197742062	0	0	NA	NA	NA	0	0	0	0	0	0
chr1_197621365_197643299	0	0	NA	NA	NA	0	0	0	0	0	0
chr1_197621365_197684204	0	0	NA	NA	NA	0	0	0	0	0	0
chr1_197641167_197643299	0	0	NA	NA	NA	0	0	0	0	0	0
chr1_197641167_197684204	0	0	NA	NA	NA	0	0	0	0	0	0
chr1_198201683_198233365	0	0	NA	NA	NA	0	0	0	0	0	0
chr1_198222170_198233365	0	0.404115	0.302324	0.704956	0.995233	0	0	0	0	0	1.21235
chr1_198231705_198266370	0	0	NA	NA	NA	0	0	0	0	0	0
chr1_198247091_198266370	0	0	NA	NA	NA	0	0	0	0	0	0
chr1_1986880_1991030	0.192991	0	-0.213771	0.788477	0.995233	0.578972	0	0	0	0	0
chr1_200583446_200584737	0	0	NA	NA	NA	0	0	0	0	0	0
chr1_200729967_200730226	0	0	NA	NA	NA	0	0	0	0	0	0
chr1_200729967_200784772	0	0	NA	NA	NA	0	0	0	0	0	0
chr1_200729967_200801973	0	0	NA	NA	NA	0	0	0	0	0	0
chr1_200776504_200784772	0	0	NA	NA	NA	0	0	0	0	0	0
chr1_200776504_200801973	0	0.65686	0.38901	0.639658	0.995233	0	0	0	1.97058	0	0
chr1_201816407_201817722	0.330335	0.974222	0.5531	0.57067	0.995233	0.991005	0	0	0	0.820731	2.10194
chr1_201826224_201828122	0.598163	0.677692	-0.173817	0.857116	0.995233	1.79449	0	0	0	0.820731	1.21235
chr1_202385915_202398057	0	0	NA	NA	NA	0	0	0	0	0	0
chr1_202724399_202727638	0	0	NA	NA	NA	0	0	0	0	0	0
chr1_202742246_202746222	0	0	NA	NA	NA	0	0	0	0	0	0
chr1_203676137_203677232	0	0	NA	NA	NA	0	0	0	0	0	0
chr1_204082043_204083733	0	0	NA	NA	NA	0	0	0	0	0	0
chr1_207930359_207933069	0	0	NA	NA	NA	0	0	0	0	0	0
chr1_207989274_207990759	0	0	NA	NA	NA	0	0	0	0	0	0
chr1_21076216_21076468	0	0	NA	NA	NA	0	0	0	0	0	0
chr1_21076216_21100103	0	0	NA	NA	NA	0	0	0	0	0	0
chr1_21083659_21100103	0	0	NA	NA	NA	0	0	0	0	0	0
chr1_21091870_21100103	0	0	NA	NA	NA	0	0	0	0	0	0
chr1_21097423_21100103	1.07726	2.66016	0.666322	0.486098	0.995233	3.23179	0	0	3.28655	1.34062	3.35332
chr1_21102217_21102498	0	0	NA	NA	NA	0	0	0	0	0	0
chr1_211092982_211093411	0	0	NA	NA	NA	0	0	0	0	0	0
chr1_211526581_211527809	0	0	NA	NA	NA	0	0	0	0	0	0
chr1_211952260_211966532	0	0	NA	NA	NA	0	0	0	0	0	0
chr1_212179981_212184763	0	1.63497	1.39723	0.160356	0.995233	0	0	0	1.97058	1.72199	1.21235
chr1_212179981_212190365	0	0	NA	NA	NA	0	0	0	0	0	0
chr1_212179981_212194554	0	0	NA	NA	NA	0	0	0	0	0	0
chr1_212190228_212194554	0	0	NA	NA	NA	0	0	0	0	0	0
chr1_21220010_21221994	0	0	NA	NA	NA	0	0	0	0	0	0
chr1_212216335_212220759	0	0	NA	NA	NA	0	0	0	0	0	0
chr1_212218002_212220759	0	1.04286	0.961096	0.310951	0.995233	0	0	0	0	0.820731	2.30784
chr1_212502477_212506940	0.895061	1.06097	-0.289167	0.773211	0.995233	2.68518	0	0	1.97058	0	1.21235
chr1_212502477_212519275	0	0	NA	NA	NA	0	0	0	0	0	0
chr1_212957705_212960979	0	0	NA	NA	NA	0	0	0	0	0	0
chr1_213037067_213046160	0	0	NA	NA	NA	0	0	0	0	0	0
chr1_213037067_213058738	0.330335	0.573995	0.176243	0.844374	0.995233	0.991005	0	0	0	1.72199	0
chr1_213043396_213046160	0	0	NA	NA	NA	0	0	0	0	0	0
chr1_213244348_213290752	0	0	NA	NA	NA	0	0	0	0	0	0
chr1_213251038_213290752	0.192991	0.432813	-0.0123831	0.987718	0.995233	0.578972	0	0	1.29844	0	0
chr1_21327692_21329301	0	0	NA	NA	NA	0	0	0	0	0	0
chr1_213290659_213303232	0.330335	0.243313	-0.145737	0.855711	0.995233	0.991005	0	0	0	0	0.72994
chr1_213302870_213349835	0.192991	1.50785	1.05929	0.289589	0.995233	0.578972	0	0	1.97058	1.34062	1.21235
chr1_213341201_213349835	0	0.404115	0.302324	0.704956	0.995233	0	0	0	0	0	1.21235
chr1_213415912_213436159	0.425388	1.48679	0.807927	0.420962	0.995233	0	1.27616	0	2.42731	0.820731	1.21235
chr1_21377359_21415706	0	0	NA	NA	NA	0	0	0	0	0	0
chr1_21377359_21437876	0	0	NA	NA	NA	0	0	0	0	0	0
chr1_214068006_214068861	0	0	NA	NA	NA	0	0	0	0	0	0
chr1_214068006_214074752	0	0	NA	NA	NA	0	0	0	0	0	0
chr1_214068006_214089442	0	0	NA	NA	NA	0	0	0	0	0	0
chr1_214068006_214139627	0	0	NA	NA	NA	0	0	0	0	0	0
chr1_214089278_214139601	0	0	NA	NA	NA	0	0	0	0	0	0
chr1_214089278_214139627	0	0	NA	NA	NA	0	0	0	0	0	0
chr1_214110597_214139627	0	0	NA	NA	NA	0	0	0	0	0	0
chr1_214133453_214139601	0	0	NA	NA	NA	0	0	0	0	0	0
chr1_214133453_214139627	0	0	NA	NA	NA	0	0	0	0	0	0
chr1_214139414_214141405	0	0	NA	NA	NA	0	0	0	0	0	0
chr1_21415631_21437876	0	0	NA	NA	NA	0	0	0	0	0	0
chr1_214169812_214185058	0	0	NA	NA	NA	0	0	0	0	0	0
chr1_21431610_21437876	0	0	NA	NA	NA	0	0	0	0	0	0
chr1_214564331_214571344	0	0	NA	NA	NA	0	0	0	0	0	0
chr1_214625148_214638300	0	0	NA	NA	NA	0	0	0	0	0	0
chr1_214637973_214638300	0	0	NA	NA	NA	0	0	0	0	0	0
chr1_215342542_215345526	0	0	NA	NA	NA	0	0	0	0	0	0
chr1_215749244_215752480	0	0	NA	NA	NA	0	0	0	0	0	0
chr1_21599192_21616649	0.330335	0	-0.340494	0.669749	0.995233	0.991005	0	0	0	0	0
chr1_217783663_217787544	0	0	NA	NA	NA	0	0	0	0	0	0
chr1_219366424_219385094	0	0	NA	NA	NA	0	0	0	0	0	0
chr1_219366424_219392054	1.17184	2.60823	1.01251	0.274917	0.995233	1.57296	1.94256	0	3.05279	2.66996	2.10194
chr1_219366424_219414650	0	0	NA	NA	NA	0	0	0	0	0	0
chr1_219366472_219385094	0	0	NA	NA	NA	0	0	0	0	0	0
chr1_219366472_219392054	0.991877	2.0668	0.696886	0.473954	0.995233	0.578972	2.39666	0	3.28655	1.34062	1.57323
chr1_219963690_219965397	0	0	NA	NA	NA	0	0	0	0	0	0
chr1_220179448_220180680	0	0	NA	NA	NA	0	0	0	0	0	0
chr1_220275471_220276119	0	0	NA	NA	NA	0	0	0	0	0	0
chr1_220386229_220387321	0	0	NA	NA	NA	0	0	0	0	0	0
chr1_22047529_22048257	0	0	NA	NA	NA	0	0	0	0	0	0
chr1_22074631_22078108	0	0	NA	NA	NA	0	0	0	0	0	0
chr1_22074631_22079612	0	0	NA	NA	NA	0	0	0	0	0	0
chr1_220752696_220754460	0	0	NA	NA	NA	0	0	0	0	0	0
chr1_220771673_220792097	0	0	NA	NA	NA	0	0	0	0	0	0
chr1_22188250_22188608	0	0	NA	NA	NA	0	0	0	0	0	0
chr1_222897434_222898897	0.192991	0.243313	-0.0120842	0.987921	0.995233	0.578972	0	0	0	0	0.72994
chr1_223946972_223959941	0	0	NA	NA	NA	0	0	0	0	0	0
chr1_223991876_223994649	0	0	NA	NA	NA	0	0	0	0	0	0
chr1_22404922_22413359	2.72696	5.93178	1.09527	0.185203	0.995233	5.99346	2.1874	0	5.89203	5.73087	6.17244
chr1_224142179_224149975	0	0	NA	NA	NA	0	0	0	0	0	0
chr1_224142179_224150410	0.437042	0.70639	0.00172563	0.998535	0.998535	1.31113	0	0	1.29844	0.820731	0
chr1_224437914_224455835	0	0	NA	NA	NA	0	0	0	0	0	0
chr1_224454706_224455835	0	0	NA	NA	NA	0	0	0	0	0	0
chr1_224553581_224559125	3.35643	4.08853	0.501799	0.509095	0.995233	4.11227	3.99371	1.96331	3.05279	4.83728	4.37553
chr1_224553581_224567357	0.192991	1.05337	0.694026	0.472049	0.995233	0.578972	0	0	1.29844	0	1.86167
chr1_224918164_224922408	0	0	NA	NA	NA	0	0	0	0	0	0
chr1_225140372_225156576	0	0	NA	NA	NA	0	0	0	0	0	0
chr1_225140372_225161855	0	0	NA	NA	NA	0	0	0	0	0	0
chr1_225140372_225195246	0	0	NA	NA	NA	0	0	0	0	0	0
chr1_225195115_225211567	0	0	NA	NA	NA	0	0	0	0	0	0
chr1_225195115_225284941	0	0	NA	NA	NA	0	0	0	0	0	0
chr1_225211317_225211567	0	0	NA	NA	NA	0	0	0	0	0	0
chr1_225270251_225284941	0	0.273577	0.157357	0.843372	0.995233	0	0	0	0	0.820731	0
chr1_225273246_225284941	0	0	NA	NA	NA	0	0	0	0	0	0
chr1_225273412_225284941	0	0	NA	NA	NA	0	0	0	0	0	0
chr1_225306922_225311316	0	0	NA	NA	NA	0	0	0	0	0	0
chr1_225372993_225394922	0	0	NA	NA	NA	0	0	0	0	0	0
chr1_225600156_225603034	0	0	NA	NA	NA	0	0	0	0	0	0
chr1_225718256_225755116	0	0	NA	NA	NA	0	0	0	0	0	0
chr1_225742608_225755116	0	0	NA	NA	NA	0	0	0	0	0	0
chr1_227192695_227204751	0	0	NA	NA	NA	0	0	0	0	0	0
chr1_227327277_227335260	0	0	NA	NA	NA	0	0	0	0	0	0
chr1_227381487_227387353	0	0	NA	NA	NA	0	0	0	0	0	0
chr1_227381487_227400920	0	0	NA	NA	NA	0	0	0	0	0	0
chr1_227381487_227441856	0	0	NA	NA	NA	0	0	0	0	0	0
chr1_227381487_227504947	0	0	NA	NA	NA	0	0	0	0	0	0
chr1_227935393_227935934	0.192991	0.51689	0.160116	0.850099	0.995233	0.578972	0	0	0	0.820731	0.72994
chr1_22816373_22818026	0.192991	0	-0.213771	0.788477	0.995233	0.578972	0	0	0	0	0
chr1_230398319_230401113	0	0	NA	NA	NA	0	0	0	0	0	0
chr1_230798887_230800333	0	0	NA	NA	NA	0	0	0	0	0	0
chr1_230798887_230807386	0	0	NA	NA	NA	0	0	0	0	0	0
chr1_230798887_230810870	0	0	NA	NA	NA	0	0	0	0	0	0
chr1_23107914_23111569	0.451262	1.123	0.45576	0.647092	0.995233	0.578972	0.774815	0	1.29844	1.34062	0.72994
chr1_231079552_231097049	0	0	NA	NA	NA	0	0	0	0	0	0
chr1_231081135_231097049	0	0	NA	NA	NA	0	0	0	0	0	0
chr1_231084645_231097049	0	0	NA	NA	NA	0	0	0	0	0	0
chr1_231090079_231097049	0	0	NA	NA	NA	0	0	0	0	0	0
chr1_231506308_231509845	0	0	NA	NA	NA	0	0	0	0	0	0
chr1_231672959_231678357	0	0	NA	NA	NA	0	0	0	0	0	0
chr1_231930988_231954263	0	0	NA	NA	NA	0	0	0	0	0	0
chr1_2327223_2332374	0	0	NA	NA	NA	0	0	0	0	0	0
chr1_233190014_233193036	0	0	NA	NA	NA	0	0	0	0	0	0
chr1_233225807_233231609	0	0	NA	NA	NA	0	0	0	0	0	0
chr1_233296029_233314921	0	0	NA	NA	NA	0	0	0	0	0	0
chr1_233313548_233344435	0	1.00681	0.754362	0.410575	0.995233	0	0	0	1.29844	1.72199	0
chr1_233334685_233344435	0	0	NA	NA	NA	0	0	0	0	0	0
chr1_233334685_233372726	0	0	NA	NA	NA	0	0	0	0	0	0
chr1_233353645_233363117	0	0	NA	NA	NA	0	0	0	0	0	0
chr1_233353645_233372726	0	0	NA	NA	NA	0	0	0	0	0	0
chr1_233362972_233372726	0	0	NA	NA	NA	0	0	0	0	0	0
chr1_233372591_233388534	0	0	NA	NA	NA	0	0	0	0	0	0
chr1_233482188_233490757	0	0	NA	NA	NA	0	0	0	0	0	0
chr1_233482188_233498039	0	0	NA	NA	NA	0	0	0	0	0	0
chr1_23356936_23377013	0.598163	2.10058	0.963049	0.332874	0.995233	1.79449	0	0	1.97058	2.02333	2.30784
chr1_23356962_23366927	0	0	NA	NA	NA	0	0	0	0	0	0
chr1_23356962_23370979	0.437042	2.44446	1.71834	0.0795906	0.995233	1.31113	0	0	3.48767	2.27247	1.57323
chr1_23356962_23377013	0	0	NA	NA	NA	0	0	0	0	0	0
chr1_23356962_23385660	1.30957	2.86972	0.728804	0.42783	0.995233	3.15389	0.774815	0	3.05279	3.45443	2.10194
chr1_23366752_23370979	0	0	NA	NA	NA	0	0	0	0	0	0
chr1_23376880_23385660	0	0	NA	NA	NA	0	0	0	0	0	0
chr1_23397718_23398690	0.662162	2.94764	1.66691	0.0790461	0.995233	1.98649	0	0	3.28655	3.45443	2.10194
chr1_234553830_234563512	0	0	NA	NA	NA	0	0	0	0	0	0
chr1_234586174_234608557	0	0	NA	NA	NA	0	0	0	0	0	0
chr1_234593413_234608557	0	0	NA	NA	NA	0	0	0	0	0	0
chr1_235416045_235424067	0	0	NA	NA	NA	0	0	0	0	0	0
chr1_235505023_235506198	3.32706	3.7719	0.00563038	0.994244	0.998535	2.44468	4.77114	2.76535	3.82137	3.81015	3.68417
chr1_235582732_235597595	0	0	NA	NA	NA	0	0	0	0	0	0
chr1_235582788_235597595	0.192991	1.93876	1.51967	0.130037	0.995233	0.578972	0	0	1.97058	2.27247	1.57323
chr1_235643370_235658138	0	0	NA	NA	NA	0	0	0	0	0	0
chr1_235643370_235659618	0	0.432813	0.157357	0.843372	0.995233	0	0	0	1.29844	0	0
chr1_235657991_235659618	3.7096	3.05046	-0.682326	0.378984	0.995233	3.62726	2.74152	4.76001	2.77368	3.45443	2.92328
chr1_235775424_235775806	0	0	NA	NA	NA	0	0	0	0	0	0
chr1_236332006_236347206	0	0	NA	NA	NA	0	0	0	0	0	0
chr1_236341714_236347206	0	0	NA	NA	NA	0	0	0	0	0	0
chr1_236969444_236979843	0	0	NA	NA	NA	0	0	0	0	0	0
chr1_237013644_237016388	0.330335	0	-0.340494	0.669749	0.995233	0.991005	0	0	0	0	0
chr1_237023133_237026854	0	0	NA	NA	NA	0	0	0	0	0	0
chr1_24112165_24112913	0	0.432813	0.157357	0.843372	0.995233	0	0	0	1.29844	0	0
chr1_24140680_24147083	0	0	NA	NA	NA	0	0	0	0	0	0
chr1_24143165_24147083	0	0	NA	NA	NA	0	0	0	0	0	0
chr1_243362362_243375266	0	0	NA	NA	NA	0	0	0	0	0	0
chr1_243385026_243388623	0	0	NA	NA	NA	0	0	0	0	0	0
chr1_243708812_243736350	0	0	NA	NA	NA	0	0	0	0	0	0
chr1_244715624_244724447	0	0	NA	NA	NA	0	0	0	0	0	0
chr1_245006437_245012158	0	0	NA	NA	NA	0	0	0	0	0	0
chr1_245165423_245180628	0.330335	1.21322	0.743685	0.453473	0.995233	0.991005	0	0	2.42731	0	1.21235
chr1_245165423_245185598	0	0	NA	NA	NA	0	0	0	0	0	0
chr1_245180544_245222760	0	0	NA	NA	NA	0	0	0	0	0	0
chr1_245180544_245246990	0.192991	0.273577	-0.0120841	0.987921	0.995233	0.578972	0	0	0	0.820731	0
chr1_245222688_245246990	0	0.524411	0.392335	0.624885	0.995233	0	0	0	0	0	1.57323
chr1_245765879_245775278	0	0	NA	NA	NA	0	0	0	0	0	0
chr1_246078832_246093239	0	0	NA	NA	NA	0	0	0	0	0	0
chr1_246091233_246093239	0	0	NA	NA	NA	0	0	0	0	0	0
chr1_246490503_246493839	0	0	NA	NA	NA	0	0	0	0	0	0
chr1_246490503_246498776	0	0	NA	NA	NA	0	0	0	0	0	0
chr1_246490503_246518396	0	1.2838	0.989223	0.304356	0.995233	0	0	0	1.29844	1.34062	1.21235
chr1_246518333_246603426	0.192991	0.404115	0.123077	0.878155	0.995233	0.578972	0	0	0	0	1.21235
chr1_246599247_246603426	0	0	NA	NA	NA	0	0	0	0	0	0
chr1_246600450_246603426	0	0	NA	NA	NA	0	0	0	0	0	0
chr1_246670356_246835919	0	0	NA	NA	NA	0	0	0	0	0	0
chr1_246754814_246755243	0.330335	0.243313	-0.145737	0.855711	0.995233	0.991005	0	0	0	0	0.72994
chr1_246784731_246797889	0	0	NA	NA	NA	0	0	0	0	0	0
chr1_246890194_246903603	0	0	NA	NA	NA	0	0	0	0	0	0
chr1_246890194_246907427	0	0	NA	NA	NA	0	0	0	0	0	0
chr1_246899277_246907427	0	0	NA	NA	NA	0	0	0	0	0	0
chr1_247302018_247323115	0	0	NA	NA	NA	0	0	0	0	0	0
chr1_247318868_247323115	0.755723	0.971285	0.154224	0.877409	0.995233	0.991005	1.27616	0	0	1.34062	1.57323
chr1_247319708_247323115	0	0	NA	NA	NA	0	0	0	0	0	0
chr1_247320134_247323115	0	0	NA	NA	NA	0	0	0	0	0	0
chr1_247320302_247323115	0	0	NA	NA	NA	0	0	0	0	0	0
chr1_247320386_247323115	0	0	NA	NA	NA	0	0	0	0	0	0
chr1_247322308_247323097	0.451262	0.957225	0.386239	0.694017	0.995233	0.578972	0.774815	0	1.29844	0	1.57323
chr1_247322308_247323115	0.192991	0.51689	0.160116	0.850099	0.995233	0.578972	0	0	0	0.820731	0.72994
chr1_24840804_24841057	0.437042	0.432813	-0.224094	0.798615	0.995233	1.31113	0	0	1.29844	0	0
chr1_25124233_25153607	0.695314	0.957225	0.133026	0.893611	0.995233	1.31113	0.774815	0	1.29844	0	1.57323
chr1_25666965_25678184	0	0.432813	0.157357	0.843372	0.995233	0	0	0	1.29844	0	0
chr1_26581662_26582356	0	0	NA	NA	NA	0	0	0	0	0	0
chr1_26584088_26586293	0	0	NA	NA	NA	0	0	0	0	0	0
chr1_26772807_26774151	0	0	NA	NA	NA	0	0	0	0	0	0
chr1_27056142_27059283	0	0	NA	NA	NA	0	0	0	0	0	0
chr1_27269151_27269556	1.93718	3.07633	0.500762	0.558403	0.995233	2.7919	3.01965	0	3.28655	3.45443	2.488
chr1_28116073_28120143	0	0	NA	NA	NA	0	0	0	0	0	0
chr1_28337458_28343750	0	0	NA	NA	NA	0	0	0	0	0	0
chr1_28601336_28605752	0.662162	0.404115	-0.407069	0.66277	0.995233	1.98649	0	0	0	0	1.21235
chr1_28907072_28907741	0	0	NA	NA	NA	0	0	0	0	0	0
chr1_29362338_29365938	0.718636	1.18127	0.109054	0.913227	0.995233	2.15591	0	0	1.97058	0	1.57323
chr1_29481208_29481422	0	0	NA	NA	NA	0	0	0	0	0	0
chr1_31413998_31414970	0	0	NA	NA	NA	0	0	0	0	0	0
chr1_31452909_31455487	0	0	NA	NA	NA	0	0	0	0	0	0
chr1_31465237_31468067	0.524319	0.524411	-0.0880206	0.924103	0.995233	1.57296	0	0	0	0	1.57323
chr1_31465237_31479949	0.895061	2.36087	0.659961	0.497706	0.995233	2.68518	0	0	3.05279	1.72199	2.30784
chr1_31478700_31479946	0	0.432813	0.157357	0.843372	0.995233	0	0	0	1.29844	0	0
chr1_31478700_31479949	0	0	NA	NA	NA	0	0	0	0	0	0
chr1_31896540_31899670	0.258272	0.243313	-0.0640533	0.936124	0.995233	0	0.774815	0	0	0	0.72994
chr1_32381492_32385259	0	0.676127	0.340667	0.677794	0.995233	0	0	0	1.29844	0	0.72994
chr1_32381496_32385259	0.258272	0	-0.224361	0.778305	0.995233	0	0.774815	0	0	0	0
chr1_32495899_32498935	0	0	NA	NA	NA	0	0	0	0	0	0
chr1_32502511_32504220	0	0	NA	NA	NA	0	0	0	0	0	0
chr1_32502511_32505174	0	0	NA	NA	NA	0	0	0	0	0	0
chr1_32745272_32745811	1.43703	0.949704	-0.477188	0.633928	0.995233	1.57296	0.774815	1.96331	1.29844	0.820731	0.72994
chr1_32792540_32793278	1.9841	4.23693	0.946499	0.253214	0.995233	4.30479	1.6475	0	4.21066	4.21916	4.28095
chr1_33097428_33099711	0	0	NA	NA	NA	0	0	0	0	0	0
chr1_33099246_33099711	4.66721	3.66814	-1.20201	0.123543	0.995233	2.44468	5.53923	6.01771	2.77368	3.81015	4.4206
chr1_33276192_33276658	0	0	NA	NA	NA	0	0	0	0	0	0
chr1_33413823_33415375	0	0	NA	NA	NA	0	0	0	0	0	0
chr1_33760538_33760906	0	0	NA	NA	NA	0	0	0	0	0	0
chr1_3496389_3512011	0	0	NA	NA	NA	0	0	0	0	0	0
chr1_35569896_35570370	0.192991	0	-0.213771	0.788477	0.995233	0.578972	0	0	0	0	0
chr1_35758627_35761589	0	0	NA	NA	NA	0	0	0	0	0	0
chr1_35846860_35847359	0	0	NA	NA	NA	0	0	0	0	0	0
chr1_35846860_35854683	0	0	NA	NA	NA	0	0	0	0	0	0
chr1_35879573_35881315	0.598163	1.8349	0.914621	0.360317	0.995233	1.79449	0	0	3.05279	1.72199	0.72994
chr1_35881067_35881315	0.192991	0	-0.213771	0.788477	0.995233	0.578972	0	0	0	0	0
chr1_35944567_35944813	0	0	NA	NA	NA	0	0	0	0	0	0
chr1_36213508_36214205	0	0	NA	NA	NA	0	0	0	0	0	0
chr1_36432556_36439112	0	0	NA	NA	NA	0	0	0	0	0	0
chr1_36814371_36823872	0	0	NA	NA	NA	0	0	0	0	0	0
chr1_36826822_36828257	0	0	NA	NA	NA	0	0	0	0	0	0
chr1_38052912_38054683	0	0	NA	NA	NA	0	0	0	0	0	0
chr1_38332131_38339760	0	0	NA	NA	NA	0	0	0	0	0	0
chr1_39696854_39723700	0	0	NA	NA	NA	0	0	0	0	0	0
chr1_39775242_39776672	0	0	NA	NA	NA	0	0	0	0	0	0
chr1_40654727_40668286	0	0	NA	NA	NA	0	0	0	0	0	0
chr1_40656444_40668286	0	0	NA	NA	NA	0	0	0	0	0	0
chr1_40733458_40737707	0.192991	0.65686	0.32404	0.717516	0.995233	0.578972	0	0	1.97058	0	0
chr1_41474466_41475261	1.67751	1.2838	-0.393386	0.68869	0.995233	0.991005	1.27616	2.76535	1.29844	1.34062	1.21235
chr1_41474466_41475926	0	0	NA	NA	NA	0	0	0	0	0	0
chr1_41536267_41541123	0	0	NA	NA	NA	0	0	0	0	0	0
chr1_41578955_41582682	0	0	NA	NA	NA	0	0	0	0	0	0
chr1_41578955_41608784	0	0	NA	NA	NA	0	0	0	0	0	0
chr1_41578955_41627104	0	0	NA	NA	NA	0	0	0	0	0	0
chr1_41651793_41660071	0	0	NA	NA	NA	0	0	0	0	0	0
chr1_42094420_42094618	0	0	NA	NA	NA	0	0	0	0	0	0
chr1_42094420_42111914	0	0	NA	NA	NA	0	0	0	0	0	0
chr1_42693554_42744343	0.437042	0.957225	0.274914	0.777229	0.995233	1.31113	0	0	1.29844	0	1.57323
chr1_42693554_42776781	0	0	NA	NA	NA	0	0	0	0	0	0
chr1_42730786_42744343	0.192991	0	-0.213771	0.788477	0.995233	0.578972	0	0	0	0	0
chr1_42730786_42744455	0	0	NA	NA	NA	0	0	0	0	0	0
chr1_42730786_42776781	0	0	NA	NA	NA	0	0	0	0	0	0
chr1_42730786_42789498	0.598163	0.676127	-0.221597	0.81783	0.995233	1.79449	0	0	1.29844	0	0.72994
chr1_42744019_42744343	0	0	NA	NA	NA	0	0	0	0	0	0
chr1_42744019_42776781	0	0	NA	NA	NA	0	0	0	0	0	0
chr1_43130534_43133111	0	0	NA	NA	NA	0	0	0	0	0	0
chr1_43239234_43241150	0	0	NA	NA	NA	0	0	0	0	0	0
chr1_44713611_44785416	1.65553	2.36786	0.216598	0.812973	0.995233	2.56994	2.39666	0	1.97058	2.48486	2.64813
chr1_44713611_44804994	0	0	NA	NA	NA	0	0	0	0	0	0
chr1_44750507_44785416	1.94089	2.69372	0.226739	0.797648	0.995233	2.56994	3.25273	0	2.42731	3.55191	2.10194
chr1_44750507_44804994	0	0	NA	NA	NA	0	0	0	0	0	0
chr1_44773982_44785416	0	0	NA	NA	NA	0	0	0	0	0	0
chr1_44773982_44804994	1.07317	1.2838	-0.262604	0.792866	0.995233	2.44468	0.774815	0	1.29844	1.34062	1.21235
chr1_44773982_44818597	0	0	NA	NA	NA	0	0	0	0	0	0
chr1_44785300_44804994	0	0	NA	NA	NA	0	0	0	0	0	0
chr1_44804717_44804994	0	0	NA	NA	NA	0	0	0	0	0	0
chr1_44877653_44878394	0	0	NA	NA	NA	0	0	0	0	0	0
chr1_44877653_44881895	0	0	NA	NA	NA	0	0	0	0	0	0
chr1_45223228_45223812	0.330335	2.19185	1.64832	0.0973225	0.995233	0.991005	0	0	1.29844	2.48486	2.79226
chr1_45553553_45553909	0	0	NA	NA	NA	0	0	0	0	0	0
chr1_46032241_46032692	1.19456	0.51689	-0.890072	0.374218	0.995233	2.30751	1.27616	0	0	0.820731	0.72994
chr1_46096154_46106075	0	0	NA	NA	NA	0	0	0	0	0	0
chr1_46099161_46108171	0	0	NA	NA	NA	0	0	0	0	0	0
chr1_46105882_46108171	0	0	NA	NA	NA	0	0	0	0	0	0
chr1_46193303_46195441	0	0	NA	NA	NA	0	0	0	0	0	0
chr1_46290105_46295253	0	0	NA	NA	NA	0	0	0	0	0	0
chr1_46290105_46348067	0	0	NA	NA	NA	0	0	0	0	0	0
chr1_46290105_46425149	0.192991	0	-0.213771	0.788477	0.995233	0.578972	0	0	0	0	0
chr1_46543187_46546422	0.192991	0.404115	0.123077	0.878155	0.995233	0.578972	0	0	0	0	1.21235
chr1_47753223_47761520	0.192991	0	-0.213771	0.788477	0.995233	0.578972	0	0	0	0	0
chr1_47753223_47765824	0	0.273577	0.157357	0.843372	0.995233	0	0	0	0	0.820731	0
chr1_47761437_47767420	0	0	NA	NA	NA	0	0	0	0	0	0
chr1_47761437_47770668	0	0	NA	NA	NA	0	0	0	0	0	0
chr1_47834141_47838779	1.31244	4.10409	1.24635	0.16319	0.995233	3.93732	0	0	4.84463	3.45443	4.0132
chr1_48821342_48825442	0	0	NA	NA	NA	0	0	0	0	0	0
chr1_51001041_51032903	0	0	NA	NA	NA	0	0	0	0	0	0
chr1_51001041_51061888	0	0	NA	NA	NA	0	0	0	0	0	0
chr1_51005264_51061888	0	0	NA	NA	NA	0	0	0	0	0	0
chr1_51032749_51050483	0	0	NA	NA	NA	0	0	0	0	0	0
chr1_51032749_51061888	0	0	NA	NA	NA	0	0	0	0	0	0
chr1_51048290_51061888	0.451262	2.81484	2.17118	0.0228351	0.995233	0.578972	0.774815	0	3.28655	2.66996	2.488
chr1_51121114_51210447	0	0	NA	NA	NA	0	0	0	0	0	0
chr1_51171458_51210447	0	0	NA	NA	NA	0	0	0	0	0	0
chr1_51171458_51246716	0	0	NA	NA	NA	0	0	0	0	0	0
chr1_51204535_51267349	0	0	NA	NA	NA	0	0	0	0	0	0
chr1_51253672_51267349	0	0	NA	NA	NA	0	0	0	0	0	0
chr1_51253672_51323669	0	0	NA	NA	NA	0	0	0	0	0	0
chr1_51868107_51874004	0	0	NA	NA	NA	0	0	0	0	0	0
chr1_51871577_51874004	0	0	NA	NA	NA	0	0	0	0	0	0
chr1_51906019_51913807	0	0	NA	NA	NA	0	0	0	0	0	0
chr1_51926763_51930998	0	0	NA	NA	NA	0	0	0	0	0	0
chr1_52211208_52231653	0.192991	0.432813	-0.0123831	0.987718	0.995233	0.578972	0	0	1.29844	0	0
chr1_52215817_52227643	0.192991	0	-0.213771	0.788477	0.995233	0.578972	0	0	0	0	0
chr1_52215817_52231653	0	0	NA	NA	NA	0	0	0	0	0	0
chr1_52237742_52238395	0	0	NA	NA	NA	0	0	0	0	0	0
chr1_52289336_52299842	0	0	NA	NA	NA	0	0	0	0	0	0
chr1_52293468_52299842	0	0	NA	NA	NA	0	0	0	0	0	0
chr1_52956404_52975384	0	0	NA	NA	NA	0	0	0	0	0	0
chr1_52959283_52962855	0	0	NA	NA	NA	0	0	0	0	0	0
chr1_52959283_52975384	0	0	NA	NA	NA	0	0	0	0	0	0
chr1_53326403_53333449	0	0	NA	NA	NA	0	0	0	0	0	0
chr1_53343354_53347337	0	0	NA	NA	NA	0	0	0	0	0	0
chr1_53343354_53358647	0	0	NA	NA	NA	0	0	0	0	0	0
chr1_53351505_53358647	0	0	NA	NA	NA	0	0	0	0	0	0
chr1_53459075_53459374	0	0	NA	NA	NA	0	0	0	0	0	0
chr1_54254806_54262817	0	0	NA	NA	NA	0	0	0	0	0	0
chr1_54284644_54298264	0	0	NA	NA	NA	0	0	0	0	0	0
chr1_54506429_54509198	0	0	NA	NA	NA	0	0	0	0	0	0
chr1_55637229_55643805	0	0	NA	NA	NA	0	0	0	0	0	0
chr1_56977648_56990226	0.598163	1.32695	0.322135	0.748108	0.995233	1.79449	0	0	1.29844	0.820731	1.86167
chr1_56977648_57002784	0	0	NA	NA	NA	0	0	0	0	0	0
chr1_58971732_59002413	0	0	NA	NA	NA	0	0	0	0	0	0
chr1_59787208_59812070	0	0	NA	NA	NA	0	0	0	0	0	0
chr1_59787208_59844509	0.192991	0.971285	0.61616	0.519227	0.995233	0.578972	0	0	0	1.34062	1.57323
chr1_59805630_59812070	0.588607	2.5684	2.06859	0.03124	0.995233	0.991005	0.774815	0	4.0922	0.820731	2.79226
chr1_59805630_59844509	0	0.243313	0.157357	0.843372	0.995233	0	0	0	0	0	0.72994
chr1_6007164_6012896	0	0	NA	NA	NA	0	0	0	0	0	0
chr1_6007164_6022009	0	0	NA	NA	NA	0	0	0	0	0	0
chr1_61553821_61743257	0	0.243313	0.157357	0.843372	0.995233	0	0	0	0	0	0.72994
chr1_61743192_61824946	0.192991	0	-0.213771	0.788477	0.995233	0.578972	0	0	0	0	0
chr1_61743192_61849037	0	0	NA	NA	NA	0	0	0	0	0	0
chr1_61798184_61824946	0	0.432813	0.157357	0.843372	0.995233	0	0	0	1.29844	0	0
chr1_62234955_62241006	0	0	NA	NA	NA	0	0	0	0	0	0
chr1_62257020_62263100	0.662162	1.06097	0.0820308	0.934305	0.995233	1.98649	0	0	1.97058	0	1.21235
chr1_6291962_6293703	0	0	NA	NA	NA	0	0	0	0	0	0
chr1_63042933_63052295	0	0	NA	NA	NA	0	0	0	0	0	0
chr1_63119396_63128801	0	0	NA	NA	NA	0	0	0	0	0	0
chr1_6341162_6355040	0	0	NA	NA	NA	0	0	0	0	0	0
chr1_63944435_63955889	0	0	NA	NA	NA	0	0	0	0	0	0
chr1_63944435_63974241	0	0	NA	NA	NA	0	0	0	0	0	0
chr1_65016277_65068595	0	0	NA	NA	NA	0	0	0	0	0	0
chr1_65243306_65255197	0.994741	1.50024	-0.256824	0.797089	0.995233	2.98422	0	0	1.29844	1.34062	1.86167
chr1_65278421_65280523	0	0	NA	NA	NA	0	0	0	0	0	0
chr1_65811294_65831879	0	0	NA	NA	NA	0	0	0	0	0	0
chr1_65830318_65831879	0	0	NA	NA	NA	0	0	0	0	0	0
chr1_6659107_6659512	0	0	NA	NA	NA	0	0	0	0	0	0
chr1_67356837_67371058	0	0	NA	NA	NA	0	0	0	0	0	0
chr1_67861088_67865589	0	0	NA	NA	NA	0	0	0	0	0	0
chr1_6867043_6885270	0.451262	0	-0.37959	0.634756	0.995233	0.578972	0.774815	0	0	0	0
chr1_70650468_70654956	0	0	NA	NA	NA	0	0	0	0	0	0
chr1_70758071_70771973	0	0	NA	NA	NA	0	0	0	0	0	0
chr1_70758071_70781249	0	0	NA	NA	NA	0	0	0	0	0	0
chr1_70761813_70771973	0	0	NA	NA	NA	0	0	0	0	0	0
chr1_70766447_70781249	0	0	NA	NA	NA	0	0	0	0	0	0
chr1_741179_745550	0	0	NA	NA	NA	0	0	0	0	0	0
chr1_76253182_76255041	0.192991	0.243313	-0.0120842	0.987921	0.995233	0.578972	0	0	0	0	0.72994
chr1_77672325_77678032	0	0	NA	NA	NA	0	0	0	0	0	0
chr1_78098800_78107340	0	0	NA	NA	NA	0	0	0	0	0	0
chr1_78105134_78107340	0	0.243313	0.157357	0.843372	0.995233	0	0	0	0	0	0.72994
chr1_78107069_78107340	0	0	NA	NA	NA	0	0	0	0	0	0
chr1_78183552_78184326	0	0	NA	NA	NA	0	0	0	0	0	0
chr1_78183552_78191447	0.330335	1.27742	0.753466	0.44774	0.995233	0.991005	0	0	1.97058	0	1.86167
chr1_78267016_78272786	0	0	NA	NA	NA	0	0	0	0	0	0
chr1_78267016_78280916	0	0	NA	NA	NA	0	0	0	0	0	0
chr1_78268955_78272786	0	0.243313	0.157357	0.843372	0.995233	0	0	0	0	0	0.72994
chr1_78324623_78327007	0	0	NA	NA	NA	0	0	0	0	0	0
chr1_78324623_78329713	0	0	NA	NA	NA	0	0	0	0	0	0
chr1_78324623_78332076	0	0.676127	0.340667	0.677794	0.995233	0	0	0	1.29844	0	0.72994
chr1_7837220_7838229	0.192991	0	-0.213771	0.788477	0.995233	0.578972	0	0	0	0	0
chr1_8037712_8045195	5.65949	5.36556	-0.614312	0.380953	0.995233	4.47461	7.12556	5.3783	5.78152	5.14908	5.16608
chr1_84644860_84650865	0.994741	2.61227	0.793911	0.408361	0.995233	2.98422	0	0	3.05279	1.34062	3.44341
chr1_84644860_84680000	0	0	NA	NA	NA	0	0	0	0	0	0
chr1_8482787_8601377	0	0	NA	NA	NA	0	0	0	0	0	0
chr1_8482787_8674745	0	0	NA	NA	NA	0	0	0	0	0	0
chr1_8525985_8601377	0	0	NA	NA	NA	0	0	0	0	0	0
chr1_8525985_8674745	0	0	NA	NA	NA	0	0	0	0	0	0
chr1_8555123_8601377	0	0	NA	NA	NA	0	0	0	0	0	0
chr1_8555123_8617582	0	0	NA	NA	NA	0	0	0	0	0	0
chr1_8555123_8674745	0	0	NA	NA	NA	0	0	0	0	0	0
chr1_8568686_8617582	0	0	NA	NA	NA	0	0	0	0	0	0
chr1_8568686_8674745	0	0	NA	NA	NA	0	0	0	0	0	0
chr1_85816098_85817262	0	0	NA	NA	NA	0	0	0	0	0	0
chr1_85816098_85824530	0	0	NA	NA	NA	0	0	0	0	0	0
chr1_8601273_8617582	0	0	NA	NA	NA	0	0	0	0	0	0
chr1_8601273_8674745	0	0	NA	NA	NA	0	0	0	0	0	0
chr1_8616534_8674745	0	0	NA	NA	NA	0	0	0	0	0	0
chr1_86241357_86252144	0	0	NA	NA	NA	0	0	0	0	0	0
chr1_8674620_8684439	0	0	NA	NA	NA	0	0	0	0	0	0
chr1_87181407_87185318	0	0	NA	NA	NA	0	0	0	0	0	0
chr1_89236035_89251896	0	0	NA	NA	NA	0	0	0	0	0	0
chr1_89250322_89251896	0	0	NA	NA	NA	0	0	0	0	0	0
chr1_91356594_91383711	0	0	NA	NA	NA	0	0	0	0	0	0
chr1_91382197_91383711	0	0	NA	NA	NA	0	0	0	0	0	0
chr1_92508380_92511217	0	0	NA	NA	NA	0	0	0	0	0	0
chr1_92786156_92811471	0	0	NA	NA	NA	0	0	0	0	0	0
chr1_92798948_92811471	0.258272	0	-0.224361	0.778305	0.995233	0	0.774815	0	0	0	0
chr1_92798948_92823600	0	0	NA	NA	NA	0	0	0	0	0	0
chr1_92798948_92829327	0	0	NA	NA	NA	0	0	0	0	0	0
chr1_92798948_92846430	0.437042	0.243313	-0.252619	0.760138	0.995233	1.31113	0	0	0	0	0.72994
chr1_92798973_92846430	0.258272	0.949704	0.422663	0.659593	0.995233	0	0.774815	0	1.29844	0.820731	0.72994
chr1_93070864_93073284	0	0	NA	NA	NA	0	0	0	0	0	0
chr1_93301747_93303190	0.258272	0.273577	-0.0533871	0.946765	0.995233	0	0.774815	0	0	0.820731	0
chr1_94032836_94033408	0	0	NA	NA	NA	0	0	0	0	0	0
chr1_94037227_94041686	0	0	NA	NA	NA	0	0	0	0	0	0
chr1_94047858_94049678	0	0	NA	NA	NA	0	0	0	0	0	0
chr1_94107860_94140497	0	0	NA	NA	NA	0	0	0	0	0	0
chr1_94140170_94140497	0	0	NA	NA	NA	0	0	0	0	0	0
chr1_94360170_94363454	0	0	NA	NA	NA	0	0	0	0	0	0
chr1_94360170_94367225	0.192991	0.797988	0.450475	0.62738	0.995233	0.578972	0	0	0	0.820731	1.57323
chr1_94360170_94370144	0	0	NA	NA	NA	0	0	0	0	0	0
chr1_94685814_94697199	0	0	NA	NA	NA	0	0	0	0	0	0
chr1_94924163_94941293	0.192991	0.273577	-0.0120841	0.987921	0.995233	0.578972	0	0	0	0.820731	0
chr1_94924163_94946162	0	0	NA	NA	NA	0	0	0	0	0	0
chr1_94953098_94956803	0.930633	2.45022	0.934344	0.33541	0.995233	2.7919	0	0	2.77368	0.820731	3.75626
chr1_95603831_95639445	0	0	NA	NA	NA	0	0	0	0	0	0
chr1_95609447_95616975	0	0	NA	NA	NA	0	0	0	0	0	0
chr1_95609447_95639445	1.11477	0.97811	-0.156579	0.876155	0.995233	0.578972	0	2.76535	0	1.72199	1.21235
chr1_97235259_97236407	0	0	NA	NA	NA	0	0	0	0	0	0
chr1_97235259_97250810	0	0.432813	0.157357	0.843372	0.995233	0	0	0	1.29844	0	0
chr1_97839117_97848017	0	0	NA	NA	NA	0	0	0	0	0	0
chr1_97981282_98015300	0	0	NA	NA	NA	0	0	0	0	0	0
chr1_98144651_98165103	0.192991	0.432813	-0.0123831	0.987718	0.995233	0.578972	0	0	1.29844	0	0
chr1_9931245_9938047	0	0	NA	NA	NA	0	0	0	0	0	0
chr1_9991949_9994918	0	0	NA	NA	NA	0	0	0	0	0	0
chr1_9991949_9995685	0	0	NA	NA	NA	0	0	0	0	0	0
chr10_101657843_101659823	0	0	NA	NA	NA	0	0	0	0	0	0
chr10_102019975_102021820	0	0	NA	NA	NA	0	0	0	0	0	0
chr10_102697159_102703885	0	0	NA	NA	NA	0	0	0	0	0	0
chr10_102697159_102710510	0	1.05242	0.949397	0.317463	0.995233	0	0	0	2.42731	0	0.72994
chr10_103384502_103436193	2.3303	2.63259	-0.312798	0.717786	0.995233	3.73819	3.25273	0	1.97058	2.66996	3.25722
chr10_103427643_103436193	0	0	NA	NA	NA	0	0	0	0	0	0
chr10_103432672_103436193	0	0	NA	NA	NA	0	0	0	0	0	0
chr10_103649169_103717489	0	0	NA	NA	NA	0	0	0	0	0	0
chr10_103699620_103717489	0	0	NA	NA	NA	0	0	0	0	0	0
chr10_103783234_103789502	0	0	NA	NA	NA	0	0	0	0	0	0
chr10_104018686_104019873	0.524319	0.243313	-0.364457	0.672959	0.995233	1.57296	0	0	0	0	0.72994
chr10_104018686_104044827	0	0	NA	NA	NA	0	0	0	0	0	0
chr10_104018686_104103939	0	0	NA	NA	NA	0	0	0	0	0	0
chr10_104117796_104119192	0.598163	1.32599	0.400693	0.689816	0.995233	1.79449	0	0	2.42731	0.820731	0.72994
chr10_104119941_104120152	0.524319	0.894134	0.193752	0.84326	0.995233	1.57296	0	0	0	0.820731	1.86167
chr10_1046617_1053068	0.76917	3.16788	1.62165	0.0822414	0.995233	2.30751	0	0	3.28655	3.7291	2.488
chr10_104809464_104816721	0.524319	0.676127	-0.123189	0.896903	0.995233	1.57296	0	0	1.29844	0	0.72994
chr10_105106995_105108756	0.451262	0.243313	-0.207309	0.805451	0.995233	0.578972	0.774815	0	0	0	0.72994
chr10_105197772_105198565	0	0	NA	NA	NA	0	0	0	0	0	0
chr10_105750433_105752891	0	0	NA	NA	NA	0	0	0	0	0	0
chr10_106019334_106022835	3.87773	4.72516	0.170309	0.818412	0.995233	4.15289	5.517	1.96331	4.42188	4.91262	4.84096
chr10_112262479_112266912	0	0	NA	NA	NA	0	0	0	0	0	0
chr10_1125951_1126416	0	0	NA	NA	NA	0	0	0	0	0	0
chr10_1130343_1142186	0	0	NA	NA	NA	0	0	0	0	0	0
chr10_1130343_1151207	0	0	NA	NA	NA	0	0	0	0	0	0
chr10_114220283_114224416	0	0	NA	NA	NA	0	0	0	0	0	0
chr10_114286846_114298089	0	0	NA	NA	NA	0	0	0	0	0	0
chr10_114648494_114665972	0	0	NA	NA	NA	0	0	0	0	0	0
chr10_114799784_114849299	0.192991	0	-0.213771	0.788477	0.995233	0.578972	0	0	0	0	0
chr10_11523769_11527910	0	0	NA	NA	NA	0	0	0	0	0	0
chr10_11551594_11569566	0	0	NA	NA	NA	0	0	0	0	0	0
chr10_115636280_115644139	0	0.273577	0.157357	0.843372	0.995233	0	0	0	0	0.820731	0
chr10_116091562_116093054	0	0	NA	NA	NA	0	0	0	0	0	0
chr10_116247717_116251637	0	0	NA	NA	NA	0	0	0	0	0	0
chr10_11639630_11643979	0	0	NA	NA	NA	0	0	0	0	0	0
chr10_116719485_116734144	0.330335	2.21215	1.62474	0.101861	0.995233	0.991005	0	0	3.05279	1.72199	1.86167
chr10_116879949_116889297	0	0	NA	NA	NA	0	0	0	0	0	0
chr10_116879949_116925405	0	0	NA	NA	NA	0	0	0	0	0	0
chr10_116879949_116931050	0	0	NA	NA	NA	0	0	0	0	0	0
chr10_116879949_116975638	0	0	NA	NA	NA	0	0	0	0	0	0
chr10_11789348_11797607	0.192991	0.446873	0.158817	0.845786	0.995233	0.578972	0	0	0	1.34062	0
chr10_11893996_11894214	0.618379	0.676127	-0.114341	0.906088	0.995233	0.578972	1.27616	0	1.29844	0	0.72994
chr10_12039671_12056183	0.192991	1.10373	0.727435	0.453757	0.995233	0.578972	0	0	1.97058	1.34062	0
chr10_120460818_120489922	0.437042	0.243313	-0.252619	0.760138	0.995233	1.31113	0	0	0	0	0.72994
chr10_120467004_120489922	0	0	NA	NA	NA	0	0	0	0	0	0
chr10_120488807_120489922	0	0	NA	NA	NA	0	0	0	0	0	0
chr10_120828958_120830597	0	0	NA	NA	NA	0	0	0	0	0	0
chr10_12123471_12126750	0.192991	0.243313	-0.0120842	0.987921	0.995233	0.578972	0	0	0	0	0.72994
chr10_12123471_12133683	0	0	NA	NA	NA	0	0	0	0	0	0
chr10_121338238_121347760	0.976908	2.23375	0.836004	0.386396	0.995233	2.15591	0.774815	0	3.05279	1.34062	2.30784
chr10_12160748_12162266	0	0	NA	NA	NA	0	0	0	0	0	0
chr10_121663596_121668642	0.598163	1.95662	0.861326	0.388298	0.995233	1.79449	0	0	2.42731	1.34062	2.10194
chr10_12251966_12259466	0	0.273577	0.157357	0.843372	0.995233	0	0	0	0	0.820731	0
chr10_12257739_12280484	0	0	NA	NA	NA	0	0	0	0	0	0
chr10_12272947_12280484	0	0	NA	NA	NA	0	0	0	0	0	0
chr10_12291580_12292468	0	0	NA	NA	NA	0	0	0	0	0	0
chr10_123549684_123629553	0	0	NA	NA	NA	0	0	0	0	0	0
chr10_123670421_123683844	0	0	NA	NA	NA	0	0	0	0	0	0
chr10_123718839_123721032	0	0	NA	NA	NA	0	0	0	0	0	0
chr10_124151819_124184475	0	0	NA	NA	NA	0	0	0	0	0	0
chr10_12442015_12445368	0	0	NA	NA	NA	0	0	0	0	0	0
chr10_12442720_12445368	0	0	NA	NA	NA	0	0	0	0	0	0
chr10_126097111_126100769	0	0	NA	NA	NA	0	0	0	0	0	0
chr10_126172708_126177144	0	0	NA	NA	NA	0	0	0	0	0	0
chr10_126172708_126186697	0.524319	0.677692	-0.0765755	0.936046	0.995233	1.57296	0	0	0	0.820731	1.21235
chr10_126176991_126186697	0.192991	0	-0.213771	0.788477	0.995233	0.578972	0	0	0	0	0
chr10_126185530_126205840	0.588607	1.11051	0.286645	0.774293	0.995233	0.991005	0.774815	0	1.29844	0.820731	1.21235
chr10_126370176_126370948	0	0	NA	NA	NA	0	0	0	0	0	0
chr10_126370176_126384781	0	0	NA	NA	NA	0	0	0	0	0	0
chr10_126370176_126395456	0.192991	0.524411	0.252567	0.767116	0.995233	0.578972	0	0	0	0	1.57323
chr10_126463244_126478907	0	0	NA	NA	NA	0	0	0	0	0	0
chr10_126631026_126631876	0	0	NA	NA	NA	0	0	0	0	0	0
chr10_126727566_126799662	0.856434	1.04286	0.203384	0.83951	0.995233	1.79449	0.774815	0	0	0.820731	2.30784
chr10_126727566_126811437	0	0	NA	NA	NA	0	0	0	0	0	0
chr10_126727566_126822181	0	0	NA	NA	NA	0	0	0	0	0	0
chr10_126763312_126799662	0	0	NA	NA	NA	0	0	0	0	0	0
chr10_126776760_126811437	0	0	NA	NA	NA	0	0	0	0	0	0
chr10_126799559_126811437	0	0	NA	NA	NA	0	0	0	0	0	0
chr10_12802947_12811798	0	0	NA	NA	NA	0	0	0	0	0	0
chr10_12856194_12858327	0	0	NA	NA	NA	0	0	0	0	0	0
chr10_128768966_128788867	0.192991	0	-0.213771	0.788477	0.995233	0.578972	0	0	0	0	0
chr10_128768966_128798571	0	0	NA	NA	NA	0	0	0	0	0	0
chr10_128859932_128908618	1.07317	1.40704	-0.0512472	0.959005	0.995233	2.44468	0.774815	0	1.29844	0.820731	2.10194
chr10_128859932_128926028	0	0	NA	NA	NA	0	0	0	0	0	0
chr10_128923738_128926028	0	0	NA	NA	NA	0	0	0	0	0	0
chr10_131943475_131959261	1.36616	3.92418	1.9792	0.0163768	0.995233	2.15591	1.94256	0	3.48767	4.15855	4.12633
chr10_131964771_131969900	0	0	NA	NA	NA	0	0	0	0	0	0
chr10_134218130_134219793	1.25345	1.50785	-0.104037	0.916043	0.995233	1.57296	2.1874	0	1.97058	1.34062	1.21235
chr10_134421419_134464009	0	0	NA	NA	NA	0	0	0	0	0	0
chr10_134421419_134511423	0	0	NA	NA	NA	0	0	0	0	0	0
chr10_134421419_134523960	0	0	NA	NA	NA	0	0	0	0	0	0
chr10_134503896_134523960	0	0	NA	NA	NA	0	0	0	0	0	0
chr10_134503896_134540409	0	0	NA	NA	NA	0	0	0	0	0	0
chr10_135209217_135216277	0.598163	1.47417	0.444023	0.658507	0.995233	1.79449	0	0	1.97058	1.72199	0.72994
chr10_15290638_15326104	0.662162	0.273577	-0.547368	0.550091	0.995233	1.98649	0	0	0	0.820731	0
chr10_15317854_15326104	0	0	NA	NA	NA	0	0	0	0	0	0
chr10_15838099_15889942	0	0	NA	NA	NA	0	0	0	0	0	0
chr10_15858834_15885271	0	0	NA	NA	NA	0	0	0	0	0	0
chr10_15858834_15889942	0	0	NA	NA	NA	0	0	0	0	0	0
chr10_15875629_15889942	0	0	NA	NA	NA	0	0	0	0	0	0
chr10_16794538_16824083	0	0	NA	NA	NA	0	0	0	0	0	0
chr10_17199440_17210916	0	0	NA	NA	NA	0	0	0	0	0	0
chr10_17636204_17646046	0	0	NA	NA	NA	0	0	0	0	0	0
chr10_17645559_17646046	0	0	NA	NA	NA	0	0	0	0	0	0
chr10_17746430_17747740	0	0	NA	NA	NA	0	0	0	0	0	0
chr10_18955504_18957606	0	0	NA	NA	NA	0	0	0	0	0	0
chr10_21246660_21250708	0	0.677692	0.433798	0.598974	0.995233	0	0	0	0	0.820731	1.21235
chr10_21903760_21940697	0	0	NA	NA	NA	0	0	0	0	0	0
chr10_21970261_22002879	0	0.404115	0.302324	0.704956	0.995233	0	0	0	0	0	1.21235
chr10_22002701_22016857	0	0	NA	NA	NA	0	0	0	0	0	0
chr10_225934_255988	0	0	NA	NA	NA	0	0	0	0	0	0
chr10_225934_267296	0	0	NA	NA	NA	0	0	0	0	0	0
chr10_24918925_24924032	0	0	NA	NA	NA	0	0	0	0	0	0
chr10_25226113_25231365	0	0	NA	NA	NA	0	0	0	0	0	0
chr10_26994215_27009288	0	0	NA	NA	NA	0	0	0	0	0	0
chr10_27054147_27059274	0	0	NA	NA	NA	0	0	0	0	0	0
chr10_27420788_27425314	0	0	NA	NA	NA	0	0	0	0	0	0
chr10_27431316_27434519	0	0	NA	NA	NA	0	0	0	0	0	0
chr10_27453993_27454468	0	0	NA	NA	NA	0	0	0	0	0	0
chr10_27469882_27470510	0.192991	0	-0.213771	0.788477	0.995233	0.578972	0	0	0	0	0
chr10_27821436_27822923	0	0.243313	0.157357	0.843372	0.995233	0	0	0	0	0	0.72994
chr10_27855761_27867642	0	0	NA	NA	NA	0	0	0	0	0	0
chr10_28023385_28024303	0	0	NA	NA	NA	0	0	0	0	0	0
chr10_28223939_28225809	0	0	NA	NA	NA	0	0	0	0	0	0
chr10_28358701_28378770	0	0	NA	NA	NA	0	0	0	0	0	0
chr10_28420489_28438988	0	0	NA	NA	NA	0	0	0	0	0	0
chr10_28872328_28879761	0	0	NA	NA	NA	0	0	0	0	0	0
chr10_30736711_30740673	0	0	NA	NA	NA	0	0	0	0	0	0
chr10_30739187_30740673	0	0.850989	0.603702	0.493314	0.995233	0	0	0	0	1.34062	1.21235
chr10_31644073_31647262	0	0	NA	NA	NA	0	0	0	0	0	0
chr10_31644073_31676195	0	0	NA	NA	NA	0	0	0	0	0	0
chr10_31644076_31647262	0	0	NA	NA	NA	0	0	0	0	0	0
chr10_31661947_31676727	0	0	NA	NA	NA	0	0	0	0	0	0
chr10_32150323_32199491	0	0	NA	NA	NA	0	0	0	0	0	0
chr10_32197100_32199491	0	0	NA	NA	NA	0	0	0	0	0	0
chr10_32197100_32211888	0	0	NA	NA	NA	0	0	0	0	0	0
chr10_32759992_32762951	0	0	NA	NA	NA	0	0	0	0	0	0
chr10_33552574_33552801	0	0	NA	NA	NA	0	0	0	0	0	0
chr10_34558585_34573173	0.984772	0.971285	0.145069	0.884968	0.995233	0.991005	0	1.96331	0	1.34062	1.57323
chr10_34759013_34806087	0	0	NA	NA	NA	0	0	0	0	0	0
chr10_34985246_34989132	0	0	NA	NA	NA	0	0	0	0	0	0
chr10_35349802_35360267	0.330335	1.06097	0.524332	0.59138	0.995233	0.991005	0	0	1.97058	0	1.21235
chr10_35805451_35819171	0	0	NA	NA	NA	0	0	0	0	0	0
chr10_43654163_43671480	0.524319	0.432813	-0.310085	0.73107	0.995233	1.57296	0	0	1.29844	0	0
chr10_46158028_46159290	0	0	NA	NA	NA	0	0	0	0	0	0
chr10_46158990_46159290	0	0	NA	NA	NA	0	0	0	0	0	0
chr10_486811_518489	0	0	NA	NA	NA	0	0	0	0	0	0
chr10_486811_532470	0	0	NA	NA	NA	0	0	0	0	0	0
chr10_4872867_4884696	0.330335	0.243313	-0.145737	0.855711	0.995233	0.991005	0	0	0	0	0.72994
chr10_4872867_4889491	0	0.432813	0.157357	0.843372	0.995233	0	0	0	1.29844	0	0
chr10_4872867_4932115	0	0	NA	NA	NA	0	0	0	0	0	0
chr10_4872867_4950612	0	0.432813	0.157357	0.843372	0.995233	0	0	0	1.29844	0	0
chr10_4872867_4951798	0	0	NA	NA	NA	0	0	0	0	0	0
chr10_49609655_49613024	0	0	NA	NA	NA	0	0	0	0	0	0
chr10_49609655_49618211	0	0.930437	0.711226	0.43478	0.995233	0	0	0	1.97058	0.820731	0
chr10_50701163_50714058	0	0	NA	NA	NA	0	0	0	0	0	0
chr10_51040849_51051678	0	0	NA	NA	NA	0	0	0	0	0	0
chr10_51579128_51581378	0	0	NA	NA	NA	0	0	0	0	0	0
chr10_518379_532470	0	0	NA	NA	NA	0	0	0	0	0	0
chr10_52066604_52071175	0	0	NA	NA	NA	0	0	0	0	0	0
chr10_52100147_52104105	0	0	NA	NA	NA	0	0	0	0	0	0
chr10_52103252_52104105	0	0	NA	NA	NA	0	0	0	0	0	0
chr10_52193236_52226692	0	0	NA	NA	NA	0	0	0	0	0	0
chr10_52193236_52350007	0	0	NA	NA	NA	0	0	0	0	0	0
chr10_52220433_52350007	0	0	NA	NA	NA	0	0	0	0	0	0
chr10_530721_532470	0	0	NA	NA	NA	0	0	0	0	0	0
chr10_5751493_5754881	0	0	NA	NA	NA	0	0	0	0	0	0
chr10_5751493_5756170	0	0	NA	NA	NA	0	0	0	0	0	0
chr10_5815805_5842668	0	0	NA	NA	NA	0	0	0	0	0	0
chr10_5827105_5842668	0	0	NA	NA	NA	0	0	0	0	0	0
chr10_5827815_5842668	0	0	NA	NA	NA	0	0	0	0	0	0
chr10_5836848_5842668	0	0	NA	NA	NA	0	0	0	0	0	0
chr10_60374053_60380661	0	0	NA	NA	NA	0	0	0	0	0	0
chr10_60549022_60553375	0	0	NA	NA	NA	0	0	0	0	0	0
chr10_61592283_61612460	0	0	NA	NA	NA	0	0	0	0	0	0
chr10_61844360_61845011	0	0	NA	NA	NA	0	0	0	0	0	0
chr10_62021617_62039397	0	0	NA	NA	NA	0	0	0	0	0	0
chr10_64148155_64159552	0	0	NA	NA	NA	0	0	0	0	0	0
chr10_64148155_64219556	0	0	NA	NA	NA	0	0	0	0	0	0
chr10_65140078_65140242	0	0	NA	NA	NA	0	0	0	0	0	0
chr10_65140078_65169748	0	0	NA	NA	NA	0	0	0	0	0	0
chr10_65140078_65214849	0	0	NA	NA	NA	0	0	0	0	0	0
chr10_6875605_6880164	0	0	NA	NA	NA	0	0	0	0	0	0
chr10_69647175_69651312	0.330335	0.432813	-0.13101	0.877001	0.995233	0.991005	0	0	1.29844	0	0
chr10_69714352_69773943	0	0	NA	NA	NA	0	0	0	0	0	0
chr10_69726440_69752439	0	0	NA	NA	NA	0	0	0	0	0	0
chr10_69726440_69773943	0	0	NA	NA	NA	0	0	0	0	0	0
chr10_69748420_69773943	0	0	NA	NA	NA	0	0	0	0	0	0
chr10_69751956_69773943	0	0	NA	NA	NA	0	0	0	0	0	0
chr10_69785303_69804320	0	0	NA	NA	NA	0	0	0	0	0	0
chr10_69797850_69826974	0	0	NA	NA	NA	0	0	0	0	0	0
chr10_69902697_69909868	0	0	NA	NA	NA	0	0	0	0	0	0
chr10_69902697_69918384	0	0	NA	NA	NA	0	0	0	0	0	0
chr10_69966527_69970304	0	0	NA	NA	NA	0	0	0	0	0	0
chr10_70152895_70154208	0.330335	1.62641	1.05238	0.294866	0.995233	0.991005	0	0	2.42731	1.72199	0.72994
chr10_70153832_70154208	0	0	NA	NA	NA	0	0	0	0	0	0
chr10_70190193_70190417	0	0	NA	NA	NA	0	0	0	0	0	0
chr10_70218861_70229920	0	0	NA	NA	NA	0	0	0	0	0	0
chr10_70227880_70229920	0	0	NA	NA	NA	0	0	0	0	0	0
chr10_70246901_70253327	0	0	NA	NA	NA	0	0	0	0	0	0
chr10_70246901_70266475	0.598163	1.37509	0.541531	0.589512	0.995233	1.79449	0	0	0	2.02333	2.10194
chr10_70246901_70276600	0	0	NA	NA	NA	0	0	0	0	0	0
chr10_70411603_70433244	0	0	NA	NA	NA	0	0	0	0	0	0
chr10_70545893_70546449	0	0	NA	NA	NA	0	0	0	0	0	0
chr10_70696692_70703013	0	0	NA	NA	NA	0	0	0	0	0	0
chr10_70723047_70726959	0.662162	2.99334	1.69965	0.0723924	0.995233	1.98649	0	0	3.66414	2.27247	3.04339
chr10_70733301_70741337	0.76917	3.64251	2.01177	0.0259419	0.995233	2.30751	0	0	3.96313	3.81015	3.15427
chr10_70915568_70917967	0.976908	3.48599	1.87944	0.0335842	0.995233	2.15591	0.774815	0	3.28655	3.64322	3.52821
chr10_70945743_70951522	0.524319	2.77728	1.75312	0.0688397	0.995233	1.57296	0	0	2.42731	2.98125	2.92328
chr10_71243447_71258152	0	0	NA	NA	NA	0	0	0	0	0	0
chr10_71968961_71969441	0	0	NA	NA	NA	0	0	0	0	0	0
chr10_71977568_71978573	0.258272	0	-0.224361	0.778305	0.995233	0	0.774815	0	0	0	0
chr10_72099752_72100458	3.5906	3.43227	-0.288541	0.703734	0.995233	4.37514	2.74152	3.65515	3.48767	3.55191	3.25722
chr10_72285679_72291210	0	0	NA	NA	NA	0	0	0	0	0	0
chr10_72462068_72468534	0	0	NA	NA	NA	0	0	0	0	0	0
chr10_72604230_72610967	0	0	NA	NA	NA	0	0	0	0	0	0
chr10_72604230_72619256	0	0	NA	NA	NA	0	0	0	0	0	0
chr10_7262373_7269899	0	0	NA	NA	NA	0	0	0	0	0	0
chr10_7262373_7318951	0	0	NA	NA	NA	0	0	0	0	0	0
chr10_7262373_7327916	0	0	NA	NA	NA	0	0	0	0	0	0
chr10_7285520_7318951	0	0	NA	NA	NA	0	0	0	0	0	0
chr10_7285520_7327916	0	0	NA	NA	NA	0	0	0	0	0	0
chr10_7290510_7327916	0	0	NA	NA	NA	0	0	0	0	0	0
chr10_7318854_7327916	0	0.243313	0.157357	0.843372	0.995233	0	0	0	0	0	0.72994
chr10_73887840_73892939	0	0	NA	NA	NA	0	0	0	0	0	0
chr10_73887840_73912746	0	0	NA	NA	NA	0	0	0	0	0	0
chr10_74100547_74100928	0	0	NA	NA	NA	0	0	0	0	0	0
chr10_74468041_74475660	0	0	NA	NA	NA	0	0	0	0	0	0
chr10_74468041_74501603	0	0	NA	NA	NA	0	0	0	0	0	0
chr10_74474869_74475660	0	0	NA	NA	NA	0	0	0	0	0	0
chr10_74501480_74502031	0	0	NA	NA	NA	0	0	0	0	0	0
chr10_75156277_75160615	0	0	NA	NA	NA	0	0	0	0	0	0
chr10_75331179_75336119	0	0	NA	NA	NA	0	0	0	0	0	0
chr10_75506388_75506762	0	0	NA	NA	NA	0	0	0	0	0	0
chr10_75576781_75583842	0.856434	1.71472	0.544793	0.584006	0.995233	1.79449	0.774815	0	1.29844	2.27247	1.57323
chr10_75848954_75984349	0	0	NA	NA	NA	0	0	0	0	0	0
chr10_76002496_76158337	0	0	NA	NA	NA	0	0	0	0	0	0
chr10_76074425_76158337	0	0.273577	0.157357	0.843372	0.995233	0	0	0	0	0.820731	0
chr10_76349040_76360251	0	0.273577	0.157357	0.843372	0.995233	0	0	0	0	0.820731	0
chr10_76598441_76603236	0.330335	0.432813	-0.13101	0.877001	0.995233	0.991005	0	0	1.29844	0	0
chr10_76910272_76910864	0	0	NA	NA	NA	0	0	0	0	0	0
chr10_76978821_76979114	0	0.524411	0.392335	0.624885	0.995233	0	0	0	0	0	1.57323
chr10_77306789_77307420	0	0	NA	NA	NA	0	0	0	0	0	0
chr10_7839010_7844817	0	0	NA	NA	NA	0	0	0	0	0	0
chr10_79613112_79614128	0	0	NA	NA	NA	0	0	0	0	0	0
chr10_79741912_79744056	0	0	NA	NA	NA	0	0	0	0	0	0
chr10_82228303_82249070	0	0.676127	0.340667	0.677794	0.995233	0	0	0	1.29844	0	0.72994
chr10_86130770_86133571	0	0	NA	NA	NA	0	0	0	0	0	0
chr10_86177527_86185649	0	0	NA	NA	NA	0	0	0	0	0	0
chr10_86177527_86198463	0	0	NA	NA	NA	0	0	0	0	0	0
chr10_88203032_88206206	0	0	NA	NA	NA	0	0	0	0	0	0
chr10_882343_890995	0	0	NA	NA	NA	0	0	0	0	0	0
chr10_88598622_88635842	0	0	NA	NA	NA	0	0	0	0	0	0
chr10_89268093_89280926	0.192991	0.273577	-0.0120841	0.987921	0.995233	0.578972	0	0	0	0.820731	0
chr10_89527430_89536184	0	0	NA	NA	NA	0	0	0	0	0	0
chr10_89685270_89693008	0.662162	1.89585	0.737235	0.460068	0.995233	1.98649	0	0	2.77368	1.34062	1.57323
chr10_89685270_89712016	0.192991	0	-0.213771	0.788477	0.995233	0.578972	0	0	0	0	0
chr10_90653628_90665417	0	0	NA	NA	NA	0	0	0	0	0	0
chr10_909683_910210	0	0	NA	NA	NA	0	0	0	0	0	0
chr10_909683_931700	0	0	NA	NA	NA	0	0	0	0	0	0
chr10_93000241_93011197	0	0	NA	NA	NA	0	0	0	0	0	0
chr10_93185038_93221941	0	0	NA	NA	NA	0	0	0	0	0	0
chr10_93220184_93221941	0	0	NA	NA	NA	0	0	0	0	0	0
chr10_93699709_93702325	0.192991	0	-0.213771	0.788477	0.995233	0.578972	0	0	0	0	0
chr10_93754292_93768032	0	0	NA	NA	NA	0	0	0	0	0	0
chr10_93756126_93768032	0	0	NA	NA	NA	0	0	0	0	0	0
chr10_93841077_93851701	0	0	NA	NA	NA	0	0	0	0	0	0
chr10_93870833_93940776	0	0	NA	NA	NA	0	0	0	0	0	0
chr10_93870833_93952393	0	0	NA	NA	NA	0	0	0	0	0	0
chr10_93902786_93904869	0	0	NA	NA	NA	0	0	0	0	0	0
chr10_93902786_93940776	0.192991	0	-0.213771	0.788477	0.995233	0.578972	0	0	0	0	0
chr10_93902786_93952393	0	0	NA	NA	NA	0	0	0	0	0	0
chr10_94291505_94297307	0	0	NA	NA	NA	0	0	0	0	0	0
chr10_94653106_94659401	0	0.243313	0.157357	0.843372	0.995233	0	0	0	0	0	0.72994
chr10_94653106_94669388	0	0	NA	NA	NA	0	0	0	0	0	0
chr10_94653106_94679807	0	0	NA	NA	NA	0	0	0	0	0	0
chr10_94733810_94774024	0	0	NA	NA	NA	0	0	0	0	0	0
chr10_95140976_95148911	0	0	NA	NA	NA	0	0	0	0	0	0
chr10_96005703_96006378	0	0	NA	NA	NA	0	0	0	0	0	0
chr10_96201653_96203180	0.598163	0.243313	-0.469693	0.597897	0.995233	1.79449	0	0	0	0	0.72994
chr10_96201653_96204296	0	0	NA	NA	NA	0	0	0	0	0	0
chr10_96201653_96234540	0	0.432813	0.157357	0.843372	0.995233	0	0	0	1.29844	0	0
chr10_96201653_96253204	0	0.243313	0.157357	0.843372	0.995233	0	0	0	0	0	0.72994
chr10_97156977_97158946	0	0	NA	NA	NA	0	0	0	0	0	0
chr10_97250792_97253043	5.68029	5.29369	-0.389513	0.538972	0.995233	5.30434	5.32565	6.41087	5.57616	5.43117	4.87374
chr10_98618049_98667504	0	0	NA	NA	NA	0	0	0	0	0	0
chr10_98667022_98667504	0	0	NA	NA	NA	0	0	0	0	0	0
chr10_98667022_98704002	0	0	NA	NA	NA	0	0	0	0	0	0
chr10_98703870_98711953	0	0	NA	NA	NA	0	0	0	0	0	0
chr10_99196174_99197507	0	0	NA	NA	NA	0	0	0	0	0	0
chr10_99196948_99197507	0	0	NA	NA	NA	0	0	0	0	0	0
chr10_99236440_99238146	0	0	NA	NA	NA	0	0	0	0	0	0
chr10_99416042_99416731	0	0	NA	NA	NA	0	0	0	0	0	0
chr10_99416042_99424741	0	0	NA	NA	NA	0	0	0	0	0	0
chr10_99502851_99504672	0	0	NA	NA	NA	0	0	0	0	0	0
chr10_99915850_99923154	0	0	NA	NA	NA	0	0	0	0	0	0
chr11_1000432_1003804	0	0	NA	NA	NA	0	0	0	0	0	0
chr11_10019813_10024236	0	0	NA	NA	NA	0	0	0	0	0	0
chr11_102076624_102080295	0.330335	0.65686	0.230563	0.801435	0.995233	0.991005	0	0	1.97058	0	0
chr11_10209896_10215534	0	0	NA	NA	NA	0	0	0	0	0	0
chr11_102233627_102239279	1.11492	2.78603	1.17898	0.205243	0.995233	2.56994	0.774815	0	3.66414	1.34062	3.35332
chr11_103090644_103093815	0	0	NA	NA	NA	0	0	0	0	0	0
chr11_103173822_103182762	0	0	NA	NA	NA	0	0	0	0	0	0
chr11_103173822_103187349	0	0	NA	NA	NA	0	0	0	0	0	0
chr11_103173822_103194718	0	0	NA	NA	NA	0	0	0	0	0	0
chr11_103182607_103194718	0	0	NA	NA	NA	0	0	0	0	0	0
chr11_103182607_103229087	0	0	NA	NA	NA	0	0	0	0	0	0
chr11_103187274_103194718	0.192991	0	-0.213771	0.788477	0.995233	0.578972	0	0	0	0	0
chr11_106680719_106681204	0	0	NA	NA	NA	0	0	0	0	0	0
chr11_106810186_106810904	0	0	NA	NA	NA	0	0	0	0	0	0
chr11_106810186_106856857	0	0	NA	NA	NA	0	0	0	0	0	0
chr11_106849345_106856857	0	0	NA	NA	NA	0	0	0	0	0	0
chr11_107200644_107224462	0	0	NA	NA	NA	0	0	0	0	0	0
chr11_107260800_107263621	0	0	NA	NA	NA	0	0	0	0	0	0
chr11_107673727_107677602	0	0	NA	NA	NA	0	0	0	0	0	0
chr11_107673727_107686691	0	0	NA	NA	NA	0	0	0	0	0	0
chr11_107959254_107960350	0	0	NA	NA	NA	0	0	0	0	0	0
chr11_108046973_108047817	0	0	NA	NA	NA	0	0	0	0	0	0
chr11_108057209_108061227	0	0	NA	NA	NA	0	0	0	0	0	0
chr11_108098322_108100050	0	0	NA	NA	NA	0	0	0	0	0	0
chr11_108098322_108106561	0	0.432813	0.157357	0.843372	0.995233	0	0	0	1.29844	0	0
chr11_108129713_108138069	0	0.243313	0.157357	0.843372	0.995233	0	0	0	0	0	0.72994
chr11_108172375_108175579	0	0	NA	NA	NA	0	0	0	0	0	0
chr11_110007388_110008139	0	0	NA	NA	NA	0	0	0	0	0	0
chr11_110134685_110135599	0	0	NA	NA	NA	0	0	0	0	0	0
chr11_111477419_111491126	0	0	NA	NA	NA	0	0	0	0	0	0
chr11_111486967_111491126	0	0	NA	NA	NA	0	0	0	0	0	0
chr11_111622883_111624301	0	0	NA	NA	NA	0	0	0	0	0	0
chr11_111948939_111951282	0.862431	1.97071	0.852603	0.385971	0.995233	1.31113	1.27616	0	2.42731	2.27247	1.21235
chr11_11348633_11362551	0.330335	0.836928	0.266018	0.778138	0.995233	0.991005	0	0	1.29844	0	1.21235
chr11_117023157_117034608	0	0	NA	NA	NA	0	0	0	0	0	0
chr11_117030650_117034608	0	0	NA	NA	NA	0	0	0	0	0	0
chr11_118379851_118382740	0	0	NA	NA	NA	0	0	0	0	0	0
chr11_118425174_118430579	0.425388	1.34705	0.616575	0.53751	0.995233	0	1.27616	0	1.97058	1.34062	0.72994
chr11_118453894_118455359	0	0	NA	NA	NA	0	0	0	0	0	0
chr11_118454524_118455359	1.07726	2.31007	0.387756	0.689359	0.995233	3.23179	0	0	3.48767	1.34062	2.10194
chr11_118484009_118484611	0.437042	0	-0.440742	0.581888	0.995233	1.31113	0	0	0	0	0
chr11_118625414_118627996	0	0	NA	NA	NA	0	0	0	0	0	0
chr11_118629483_118634015	0	0	NA	NA	NA	0	0	0	0	0	0
chr11_118656761_118657227	0	0	NA	NA	NA	0	0	0	0	0	0
chr11_118940944_118944661	0	0	NA	NA	NA	0	0	0	0	0	0
chr11_11895347_11901927	0	0	NA	NA	NA	0	0	0	0	0	0
chr11_118997645_118997835	0	0	NA	NA	NA	0	0	0	0	0	0
chr11_119002245_119003929	0	0	NA	NA	NA	0	0	0	0	0	0
chr11_11901724_11919240	0	0	NA	NA	NA	0	0	0	0	0	0
chr11_119103158_119103405	0	0.432813	0.157357	0.843372	0.995233	0	0	0	1.29844	0	0
chr11_119144578_119145663	0	0	NA	NA	NA	0	0	0	0	0	0
chr11_120310838_120316173	0	0	NA	NA	NA	0	0	0	0	0	0
chr11_120339997_120348235	0.662162	1.62521	0.680176	0.498294	0.995233	1.98649	0	0	2.77368	0	2.10194
chr11_120343759_120348235	1.02744	1.45485	0.00749047	0.994007	0.998535	2.30751	0.774815	0	1.97058	0.820731	1.57323
chr11_120345269_120348235	0	0	NA	NA	NA	0	0	0	0	0	0
chr11_120347370_120348235	0.192991	1.33351	1.03565	0.297313	0.995233	0.578972	0	0	2.42731	0	1.57323
chr11_120524394_120531109	0	0	NA	NA	NA	0	0	0	0	0	0
chr11_120916383_120918376	0	0	NA	NA	NA	0	0	0	0	0	0
chr11_120916383_120924441	0	0	NA	NA	NA	0	0	0	0	0	0
chr11_120916383_120926017	0	0	NA	NA	NA	0	0	0	0	0	0
chr11_120916383_120930794	0	0	NA	NA	NA	0	0	0	0	0	0
chr11_121348827_121367758	0	0	NA	NA	NA	0	0	0	0	0	0
chr11_122162992_122164314	0	0	NA	NA	NA	0	0	0	0	0	0
chr11_122162992_122165713	0	0	NA	NA	NA	0	0	0	0	0	0
chr11_122646927_122647918	0	0	NA	NA	NA	0	0	0	0	0	0
chr11_122953793_122955421	0	0	NA	NA	NA	0	0	0	0	0	0
chr11_12525861_12535612	0	0	NA	NA	NA	0	0	0	0	0	0
chr11_125513687_125514538	0.192991	1.98997	1.65586	0.0985328	0.995233	0.578972	0	0	1.29844	2.02333	2.64813
chr11_125513687_125526230	0	0	NA	NA	NA	0	0	0	0	0	0
chr11_126051390_126052982	0	0	NA	NA	NA	0	0	0	0	0	0
chr11_126275991_126279306	1.54391	2.4262	0.585609	0.529628	0.995233	2.98422	1.6475	0	2.77368	0.820731	3.68417
chr11_12696956_12785981	0	0	NA	NA	NA	0	0	0	0	0	0
chr11_12785726_12785981	0	0.243313	0.157357	0.843372	0.995233	0	0	0	0	0	0.72994
chr11_12785726_12815925	0	0	NA	NA	NA	0	0	0	0	0	0
chr11_12883797_12886447	0	0	NA	NA	NA	0	0	0	0	0	0
chr11_128910823_128936763	0	0	NA	NA	NA	0	0	0	0	0	0
chr11_128932175_128936763	0	0	NA	NA	NA	0	0	0	0	0	0
chr11_128963516_128994789	0	0	NA	NA	NA	0	0	0	0	0	0
chr11_128963516_128997200	0	0	NA	NA	NA	0	0	0	0	0	0
chr11_128963516_129034322	0	0	NA	NA	NA	0	0	0	0	0	0
chr11_128993341_128994789	0	0	NA	NA	NA	0	0	0	0	0	0
chr11_128993341_128997200	0	0	NA	NA	NA	0	0	0	0	0	0
chr11_128993341_129034322	0	0	NA	NA	NA	0	0	0	0	0	0
chr11_12901255_12923660	0	0	NA	NA	NA	0	0	0	0	0	0
chr11_12902552_12923660	0	0	NA	NA	NA	0	0	0	0	0	0
chr11_129551030_129552361	0	0	NA	NA	NA	0	0	0	0	0	0
chr11_129979324_129980556	0	0	NA	NA	NA	0	0	0	0	0	0
chr11_13009949_13048585	0	0	NA	NA	NA	0	0	0	0	0	0
chr11_130130751_130131824	0	0	NA	NA	NA	0	0	0	0	0	0
chr11_1307232_1311639	0	0	NA	NA	NA	0	0	0	0	0	0
chr11_1307232_1317024	0	0	NA	NA	NA	0	0	0	0	0	0
chr11_1309854_1311639	0	0	NA	NA	NA	0	0	0	0	0	0
chr11_134063911_134064633	0.330335	1.2308	0.596537	0.547274	0.995233	0.991005	0	0	1.29844	0.820731	1.57323
chr11_13435077_13443385	0	0	NA	NA	NA	0	0	0	0	0	0
chr11_14316017_14317401	0	0	NA	NA	NA	0	0	0	0	0	0
chr11_14793483_14810788	0	0.51689	0.315698	0.692707	0.995233	0	0	0	0	0.820731	0.72994
chr11_14839729_14840755	0	0.676127	0.340667	0.677794	0.995233	0	0	0	1.29844	0	0.72994
chr11_14880589_14882912	0.330335	1.05242	0.626177	0.524344	0.995233	0.991005	0	0	2.42731	0	0.72994
chr11_17042020_17045203	0.192991	0.243313	-0.0120842	0.987921	0.995233	0.578972	0	0	0	0	0.72994
chr11_17190224_17191353	0	0	NA	NA	NA	0	0	0	0	0	0
chr11_17358507_17359081	0	0	NA	NA	NA	0	0	0	0	0	0
chr11_17378198_17378548	0	0	NA	NA	NA	0	0	0	0	0	0
chr11_17899755_18029623	0	0	NA	NA	NA	0	0	0	0	0	0
chr11_17899755_18031686	0	0	NA	NA	NA	0	0	0	0	0	0
chr11_17981017_18029623	0	0	NA	NA	NA	0	0	0	0	0	0
chr11_17981017_18031686	0	0	NA	NA	NA	0	0	0	0	0	0
chr11_18010144_18029623	0	0	NA	NA	NA	0	0	0	0	0	0
chr11_18010144_18031686	0	0	NA	NA	NA	0	0	0	0	0	0
chr11_18022044_18031686	0	0	NA	NA	NA	0	0	0	0	0	0
chr11_18305342_18307006	0	0	NA	NA	NA	0	0	0	0	0	0
chr11_18305342_18308257	0	0	NA	NA	NA	0	0	0	0	0	0
chr11_18312989_18313566	0	0	NA	NA	NA	0	0	0	0	0	0
chr11_18312989_18314523	0	0	NA	NA	NA	0	0	0	0	0	0
chr11_18536225_18537711	0	0	NA	NA	NA	0	0	0	0	0	0
chr11_18536225_18541150	0	0	NA	NA	NA	0	0	0	0	0	0
chr11_18566170_18579877	0.437042	1.25012	0.478002	0.631567	0.995233	1.31113	0	0	1.29844	1.72199	0.72994
chr11_19848422_19864469	0	0	NA	NA	NA	0	0	0	0	0	0
chr11_19961207_20005793	0	0.273577	0.157357	0.843372	0.995233	0	0	0	0	0.820731	0
chr11_19998293_20005793	0	0	NA	NA	NA	0	0	0	0	0	0
chr11_20417349_20419267	0	0	NA	NA	NA	0	0	0	0	0	0
chr11_20424465_20429578	0.437042	2.08531	1.28874	0.196065	0.995233	1.31113	0	0	2.42731	1.34062	2.488
chr11_20424465_20448411	0.192991	0	-0.213771	0.788477	0.995233	0.578972	0	0	0	0	0
chr11_20429457_20473754	0	0	NA	NA	NA	0	0	0	0	0	0
chr11_20470387_20486092	0	0	NA	NA	NA	0	0	0	0	0	0
chr11_20473676_20486092	0	0.273577	0.157357	0.843372	0.995233	0	0	0	0	0.820731	0
chr11_27412641_27434407	0	0	NA	NA	NA	0	0	0	0	0	0
chr11_28056934_28058211	0	0	NA	NA	NA	0	0	0	0	0	0
chr11_28080473_28084063	0	0	NA	NA	NA	0	0	0	0	0	0
chr11_28098554_28113060	0	0.404115	0.302324	0.704956	0.995233	0	0	0	0	0	1.21235
chr11_28232609_28233878	0	0	NA	NA	NA	0	0	0	0	0	0
chr11_28250418_28252532	0	0	NA	NA	NA	0	0	0	0	0	0
chr11_28311753_28318478	0	0	NA	NA	NA	0	0	0	0	0	0
chr11_28420335_28445911	0	0	NA	NA	NA	0	0	0	0	0	0
chr11_28700652_28763455	0	0	NA	NA	NA	0	0	0	0	0	0
chr11_28711107_28763455	0	0	NA	NA	NA	0	0	0	0	0	0
chr11_2991033_3000467	0	0	NA	NA	NA	0	0	0	0	0	0
chr11_31474265_31484852	0	0	NA	NA	NA	0	0	0	0	0	0
chr11_31477807_31484852	0	0	NA	NA	NA	0	0	0	0	0	0
chr11_32118690_32120074	1.02385	3.77648	1.77692	0.049801	0.995233	3.07155	0	0	5.17117	3.11487	3.04339
chr11_32610140_32610681	0	0	NA	NA	NA	0	0	0	0	0	0
chr11_32610140_32611187	2.73307	5.40816	1.58687	0.0329312	0.995233	4.34039	3.85882	0	5.33664	6.08041	4.80743
chr11_32611093_32617593	0	0	NA	NA	NA	0	0	0	0	0	0
chr11_33127113_33127610	0	0.243313	0.157357	0.843372	0.995233	0	0	0	0	0	0.72994
chr11_33163213_33163532	0	0	NA	NA	NA	0	0	0	0	0	0
chr11_33163213_33182915	0	0	NA	NA	NA	0	0	0	0	0	0
chr11_33307959_33308498	0.330335	0.243313	-0.145737	0.855711	0.995233	0.991005	0	0	0	0	0.72994
chr11_33307959_33309057	0	0	NA	NA	NA	0	0	0	0	0	0
chr11_33307959_33350179	0	0	NA	NA	NA	0	0	0	0	0	0
chr11_34093273_34098189	0	0	NA	NA	NA	0	0	0	0	0	0
chr11_34097783_34098189	0.895061	2.63311	1.14726	0.233311	0.995233	2.68518	0	0	3.82137	0.820731	3.25722
chr11_34969053_34991833	0.76917	2.39268	0.917822	0.346884	0.995233	2.30751	0	0	3.05279	2.02333	2.10194
chr11_34991686_35006275	0	0	NA	NA	NA	0	0	0	0	0	0
chr11_35747472_35747711	0	0	NA	NA	NA	0	0	0	0	0	0
chr11_36103203_36120011	0	0	NA	NA	NA	0	0	0	0	0	0
chr11_36248635_36248980	0.192991	0	-0.213771	0.788477	0.995233	0.578972	0	0	0	0	0
chr11_36415396_36424928	0.524319	1.18127	0.385583	0.698126	0.995233	1.57296	0	0	1.97058	0	1.57323
chr11_36415396_36440853	0.718636	1.66009	0.406634	0.684977	0.995233	2.15591	0	0	2.42731	1.34062	1.21235
chr11_36415396_36459026	0	0	NA	NA	NA	0	0	0	0	0	0
chr11_36422547_36424928	0.330335	0.620557	0.246574	0.78695	0.995233	0.991005	0	0	0	0	1.86167
chr11_3712577_3714605	0.437042	1.53572	0.85975	0.392092	0.995233	1.31113	0	0	1.29844	0.820731	2.488
chr11_3712577_3716836	0.718636	1.34705	0.133759	0.89408	0.995233	2.15591	0	0	1.97058	1.34062	0.72994
chr11_3723693_3724122	0	0	NA	NA	NA	0	0	0	0	0	0
chr11_3726430_3727857	0	0	NA	NA	NA	0	0	0	0	0	0
chr11_3735048_3740780	0	0	NA	NA	NA	0	0	0	0	0	0
chr11_3792978_3794969	0	0	NA	NA	NA	0	0	0	0	0	0
chr11_3794862_3797251	0	0	NA	NA	NA	0	0	0	0	0	0
chr11_3800103_3803375	0	0	NA	NA	NA	0	0	0	0	0	0
chr11_38113314_38144663	0	0	NA	NA	NA	0	0	0	0	0	0
chr11_38116674_38144663	0	0	NA	NA	NA	0	0	0	0	0	0
chr11_38116674_38222598	0	0	NA	NA	NA	0	0	0	0	0	0
chr11_4123223_4127453	0.76917	2.18419	0.697432	0.479315	0.995233	2.30751	0	0	2.42731	2.02333	2.10194
chr11_4123223_4133292	0.437042	2.29706	1.46464	0.138846	0.995233	1.31113	0	0	1.97058	2.27247	2.64813
chr11_4128665_4133292	0	0	NA	NA	NA	0	0	0	0	0	0
chr11_43436140_43457884	0	0	NA	NA	NA	0	0	0	0	0	0
chr11_43819870_43861614	0	0	NA	NA	NA	0	0	0	0	0	0
chr11_43852526_43861614	0.814894	3.26245	1.60527	0.0830856	0.995233	2.44468	0	0	3.96313	2.66996	3.15427
chr11_44129233_44135851	0	0.432813	0.157357	0.843372	0.995233	0	0	0	1.29844	0	0
chr11_44129233_44151688	0.662162	1.45485	0.315203	0.753732	0.995233	1.98649	0	0	1.97058	0.820731	1.57323
chr11_44146339_44151688	0	0	NA	NA	NA	0	0	0	0	0	0
chr11_45986866_46113774	0	0	NA	NA	NA	0	0	0	0	0	0
chr11_46098305_46105853	0	0	NA	NA	NA	0	0	0	0	0	0
chr11_46098305_46113774	0	0	NA	NA	NA	0	0	0	0	0	0
chr11_46515158_46529920	0	0	NA	NA	NA	0	0	0	0	0	0
chr11_46515158_46534363	0	0	NA	NA	NA	0	0	0	0	0	0
chr11_46804824_46810323	0	0	NA	NA	NA	0	0	0	0	0	0
chr11_46810231_46812133	0	0	NA	NA	NA	0	0	0	0	0	0
chr11_46811626_46812133	0	0	NA	NA	NA	0	0	0	0	0	0
chr11_47187819_47189802	2.73731	3.40053	0.432914	0.588099	0.995233	3.50709	2.74152	1.96331	3.96313	2.98125	3.25722
chr11_47444125_47444524	0	0	NA	NA	NA	0	0	0	0	0	0
chr11_47504247_47510576	0	0	NA	NA	NA	0	0	0	0	0	0
chr11_47505005_47506075	0	0	NA	NA	NA	0	0	0	0	0	0
chr11_47505941_47510576	0	0	NA	NA	NA	0	0	0	0	0	0
chr11_47508302_47510576	0	0.273577	0.157357	0.843372	0.995233	0	0	0	0	0.820731	0
chr11_47508302_47522484	0	0	NA	NA	NA	0	0	0	0	0	0
chr11_47774468_47776216	0	0	NA	NA	NA	0	0	0	0	0	0
chr11_47804625_47808106	0	0	NA	NA	NA	0	0	0	0	0	0
chr11_47837031_47841010	0	0	NA	NA	NA	0	0	0	0	0	0
chr11_47843276_47859175	0	0	NA	NA	NA	0	0	0	0	0	0
chr11_57258697_57259335	0	0	NA	NA	NA	0	0	0	0	0	0
chr11_59406521_59406856	0	0	NA	NA	NA	0	0	0	0	0	0
chr11_59426339_59426942	0	0	NA	NA	NA	0	0	0	0	0	0
chr11_61094251_61097546	0	0	NA	NA	NA	0	0	0	0	0	0
chr11_61096835_61097546	0	0	NA	NA	NA	0	0	0	0	0	0
chr11_61133517_61135470	0.192991	1.62641	1.26807	0.206613	0.995233	0.578972	0	0	2.42731	1.72199	0.72994
chr11_61205097_61205585	0	1.33455	1.09784	0.260049	0.995233	0	0	0	1.97058	0.820731	1.21235
chr11_62406455_62407203	0	0	NA	NA	NA	0	0	0	0	0	0
chr11_62549366_62550297	0.524319	1.54239	0.96608	0.33628	0.995233	1.57296	0	0	3.28655	1.34062	0
chr11_62621273_62622688	0	0	NA	NA	NA	0	0	0	0	0	0
chr11_62638217_62639141	0.192991	1.2308	0.784606	0.425448	0.995233	0.578972	0	0	1.29844	0.820731	1.57323
chr11_62649365_62655690	0.856434	1.123	-0.0430874	0.965789	0.995233	1.79449	0.774815	0	1.29844	1.34062	0.72994
chr11_62650380_62653080	0	0.243313	0.157357	0.843372	0.995233	0	0	0	0	0	0.72994
chr11_62652649_62653080	2.81061	4.45701	0.674522	0.383117	0.995233	4.37514	4.0567	0	3.82137	5.08538	4.46429
chr11_63419408_63420047	0	0	NA	NA	NA	0	0	0	0	0	0
chr11_63426233_63426724	0.437042	1.63108	0.865699	0.388893	0.995233	1.31113	0	0	1.97058	0.820731	2.10194
chr11_6344815_6345265	0	0	NA	NA	NA	0	0	0	0	0	0
chr11_63662631_63663105	0	0	NA	NA	NA	0	0	0	0	0	0
chr11_63918711_63919865	0	0	NA	NA	NA	0	0	0	0	0	0
chr11_63960550_63962092	0.192991	0	-0.213771	0.788477	0.995233	0.578972	0	0	0	0	0
chr11_64627396_64627808	0	0	NA	NA	NA	0	0	0	0	0	0
chr11_65061624_65063461	0.949707	1.73542	0.489397	0.621363	0.995233	1.57296	1.27616	0	1.97058	2.02333	1.21235
chr11_65202524_65205128	0	0	NA	NA	NA	0	0	0	0	0	0
chr11_65269792_65272066	1.68103	4.11402	0.934654	0.278995	0.995233	4.26829	0.774815	0	4.42188	4.09528	3.82491
chr11_65271200_65272066	1.42013	1.92536	0.0434666	0.963948	0.995233	2.98422	1.27616	0	2.77368	2.27247	0.72994
chr11_65661485_65664477	0	0	NA	NA	NA	0	0	0	0	0	0
chr11_66254011_66255478	0.437042	0.97811	0.342127	0.726576	0.995233	1.31113	0	0	0	1.72199	1.21235
chr11_66407149_66407594	0	0	NA	NA	NA	0	0	0	0	0	0
chr11_66407171_66407594	1.59442	3.97492	1.32305	0.115581	0.995233	3.50709	1.27616	0	4.21066	3.64322	4.07088
chr11_66410921_66411611	1.14402	2.66122	1.10473	0.233993	0.995233	2.15591	1.27616	0	2.42731	3.45443	2.10194
chr11_66523824_66526567	0	0	NA	NA	NA	0	0	0	0	0	0
chr11_66583524_66590145	0	0	NA	NA	NA	0	0	0	0	0	0
chr11_66583524_66595835	1.25345	1.28804	0.2531	0.799063	0.995233	1.57296	2.1874	0	0	0.820731	3.04339
chr11_66589114_66590145	0	0	NA	NA	NA	0	0	0	0	0	0
chr11_66589114_66595835	0	0	NA	NA	NA	0	0	0	0	0	0
chr11_66982811_66986874	0.330335	0	-0.340494	0.669749	0.995233	0.991005	0	0	0	0	0
chr11_66985202_66995634	0	0	NA	NA	NA	0	0	0	0	0	0
chr11_68115315_68115711	0	0	NA	NA	NA	0	0	0	0	0	0
chr11_68115315_68125315	0	0	NA	NA	NA	0	0	0	0	0	0
chr11_68115315_68131411	0	0	NA	NA	NA	0	0	0	0	0	0
chr11_68115315_68133170	0	0	NA	NA	NA	0	0	0	0	0	0
chr11_68125118_68133170	0	0	NA	NA	NA	0	0	0	0	0	0
chr11_68153784_68157520	0.662162	1.17375	0.0929255	0.926108	0.995233	1.98649	0	0	1.97058	0.820731	0.72994
chr11_68190957_68193655	0	0	NA	NA	NA	0	0	0	0	0	0
chr11_68272613_68305359	0	0	NA	NA	NA	0	0	0	0	0	0
chr11_68282496_68287119	0	0	NA	NA	NA	0	0	0	0	0	0
chr11_68286969_68305359	0	0	NA	NA	NA	0	0	0	0	0	0
chr11_68305127_68305359	0	0	NA	NA	NA	0	0	0	0	0	0
chr11_68334482_68343511	0	0	NA	NA	NA	0	0	0	0	0	0
chr11_68527037_68529155	0	0	NA	NA	NA	0	0	0	0	0	0
chr11_68571468_68575106	0	0	NA	NA	NA	0	0	0	0	0	0
chr11_68571468_68580044	0.895061	1.40704	-0.0808946	0.935721	0.995233	2.68518	0	0	1.29844	0.820731	2.10194
chr11_70013348_70026162	0	0	NA	NA	NA	0	0	0	0	0	0
chr11_70200407_70202360	0	0	NA	NA	NA	0	0	0	0	0	0
chr11_70200407_70208594	0	0	NA	NA	NA	0	0	0	0	0	0
chr11_70505933_70507783	0	0.432813	0.157357	0.843372	0.995233	0	0	0	1.29844	0	0
chr11_71693807_71701763	0	0	NA	NA	NA	0	0	0	0	0	0
chr11_72468812_72470426	0	0	NA	NA	NA	0	0	0	0	0	0
chr11_72578910_72600990	0	0	NA	NA	NA	0	0	0	0	0	0
chr11_72578910_72613683	0	0	NA	NA	NA	0	0	0	0	0	0
chr11_72598515_72600990	0	0	NA	NA	NA	0	0	0	0	0	0
chr11_72598515_72613683	0	0	NA	NA	NA	0	0	0	0	0	0
chr11_72695133_72700142	0	0	NA	NA	NA	0	0	0	0	0	0
chr11_73418465_73429763	0	0	NA	NA	NA	0	0	0	0	0	0
chr11_73418465_73429935	0	0	NA	NA	NA	0	0	0	0	0	0
chr11_73418465_73431944	0	0	NA	NA	NA	0	0	0	0	0	0
chr11_73620444_73630077	1.41669	2.74764	0.804992	0.373111	0.995233	2.30751	1.94256	0	2.77368	2.98125	2.488
chr11_73829273_73834180	0	0	NA	NA	NA	0	0	0	0	0	0
chr11_73843889_73844602	0	0	NA	NA	NA	0	0	0	0	0	0
chr11_74500671_74528759	0	0	NA	NA	NA	0	0	0	0	0	0
chr11_74521229_74528759	0	0	NA	NA	NA	0	0	0	0	0	0
chr11_74617284_74618318	0	0	NA	NA	NA	0	0	0	0	0	0
chr11_755879_760253	0	0	NA	NA	NA	0	0	0	0	0	0
chr11_75590923_75623083	0	0	NA	NA	NA	0	0	0	0	0	0
chr11_75715049_75728024	0	0	NA	NA	NA	0	0	0	0	0	0
chr11_75718578_75728024	0	0	NA	NA	NA	0	0	0	0	0	0
chr11_76224430_76227356	0	0	NA	NA	NA	0	0	0	0	0	0
chr11_76670023_76709865	0	0	NA	NA	NA	0	0	0	0	0	0
chr11_76687333_76709865	0	0	NA	NA	NA	0	0	0	0	0	0
chr11_76696687_76709865	0	0	NA	NA	NA	0	0	0	0	0	0
chr11_77085373_77091039	0	0	NA	NA	NA	0	0	0	0	0	0
chr11_77090286_77091039	0	0	NA	NA	NA	0	0	0	0	0	0
chr11_77330651_77336863	0	0	NA	NA	NA	0	0	0	0	0	0
chr11_77330651_77340944	0	0	NA	NA	NA	0	0	0	0	0	0
chr11_77333545_77336863	0	0.446873	0.330042	0.679747	0.995233	0	0	0	0	1.34062	0
chr11_77336008_77336863	0	0	NA	NA	NA	0	0	0	0	0	0
chr11_77336008_77340944	0	0	NA	NA	NA	0	0	0	0	0	0
chr11_77394755_77404656	0	0	NA	NA	NA	0	0	0	0	0	0
chr11_77396150_77404656	0	0	NA	NA	NA	0	0	0	0	0	0
chr11_77433733_77436744	0	0	NA	NA	NA	0	0	0	0	0	0
chr11_77435393_77436744	0	0	NA	NA	NA	0	0	0	0	0	0
chr11_77666988_77672184	0	0	NA	NA	NA	0	0	0	0	0	0
chr11_77823696_77832220	0	0	NA	NA	NA	0	0	0	0	0	0
chr11_77824932_77832220	0	0	NA	NA	NA	0	0	0	0	0	0
chr11_77830228_77838482	0	0	NA	NA	NA	0	0	0	0	0	0
chr11_78176922_78189729	0	0	NA	NA	NA	0	0	0	0	0	0
chr11_78176922_78204241	0.618379	2.48978	1.61223	0.0953156	0.995233	0.578972	1.27616	0	2.77368	2.83398	1.86167
chr11_78180293_78204241	0	0	NA	NA	NA	0	0	0	0	0	0
chr11_78270585_78282489	0	0	NA	NA	NA	0	0	0	0	0	0
chr11_82560091_82571159	0	0	NA	NA	NA	0	0	0	0	0	0
chr11_82917100_82922472	0.192991	0.51689	0.160116	0.850099	0.995233	0.578972	0	0	0	0.820731	0.72994
chr11_82984690_82989872	0	0	NA	NA	NA	0	0	0	0	0	0
chr11_847201_850367	0	0	NA	NA	NA	0	0	0	0	0	0
chr11_85685751_85695016	0	0	NA	NA	NA	0	0	0	0	0	0
chr11_85692172_85693046	0	0	NA	NA	NA	0	0	0	0	0	0
chr11_85692172_85695016	0	0	NA	NA	NA	0	0	0	0	0	0
chr11_85692788_85695016	0	0	NA	NA	NA	0	0	0	0	0	0
chr11_85692788_85701442	0	0	NA	NA	NA	0	0	0	0	0	0
chr11_85692788_85707972	0	0	NA	NA	NA	0	0	0	0	0	0
chr11_85707869_85714494	0	0	NA	NA	NA	0	0	0	0	0	0
chr11_85707869_85742653	0	0	NA	NA	NA	0	0	0	0	0	0
chr11_85718585_85742653	0	0	NA	NA	NA	0	0	0	0	0	0
chr11_85722073_85726006	0	0	NA	NA	NA	0	0	0	0	0	0
chr11_85722073_85742653	0	0	NA	NA	NA	0	0	0	0	0	0
chr11_85961338_85963282	0	0	NA	NA	NA	0	0	0	0	0	0
chr11_85961338_85967554	0	0	NA	NA	NA	0	0	0	0	0	0
chr11_85966264_85967554	0	0	NA	NA	NA	0	0	0	0	0	0
chr11_85966264_85968638	0	0	NA	NA	NA	0	0	0	0	0	0
chr11_86267595_86270865	0.192991	1.0176	1.00515	0.306028	0.995233	0.578972	0	0	3.05279	0	0
chr11_86778736_86782657	0	0	NA	NA	NA	0	0	0	0	0	0
chr11_86778736_86784012	0	0.432813	0.157357	0.843372	0.995233	0	0	0	1.29844	0	0
chr11_86778736_86786828	0	0	NA	NA	NA	0	0	0	0	0	0
chr11_86778736_86802437	0.437042	0	-0.440742	0.581888	0.995233	1.31113	0	0	0	0	0
chr11_86778736_86868448	0	0	NA	NA	NA	0	0	0	0	0	0
chr11_86868383_86869813	0.524319	0.900173	0.148189	0.879597	0.995233	1.57296	0	0	1.97058	0	0.72994
chr11_8693444_8696430	0	0	NA	NA	NA	0	0	0	0	0	0
chr11_883148_884169	0	0	NA	NA	NA	0	0	0	0	0	0
chr11_8987451_8989588	0	0	NA	NA	NA	0	0	0	0	0	0
chr11_9069490_9074762	0	0	NA	NA	NA	0	0	0	0	0	0
chr11_9199679_9200620	0	0	NA	NA	NA	0	0	0	0	0	0
chr11_9225207_9229179	0	0	NA	NA	NA	0	0	0	0	0	0
chr11_9304918_9309353	0	0	NA	NA	NA	0	0	0	0	0	0
chr11_9304918_9316934	0	0	NA	NA	NA	0	0	0	0	0	0
chr11_9304918_9321248	0	0	NA	NA	NA	0	0	0	0	0	0
chr11_9308002_9316934	0	0	NA	NA	NA	0	0	0	0	0	0
chr11_9308002_9321248	0	0	NA	NA	NA	0	0	0	0	0	0
chr11_9309249_9316934	0	0	NA	NA	NA	0	0	0	0	0	0
chr11_93435626_93440063	0.437042	1.05337	0.39622	0.686444	0.995233	1.31113	0	0	1.29844	0	1.86167
chr11_94178976_94180604	0	0	NA	NA	NA	0	0	0	0	0	0
chr11_94219090_94224131	0	0	NA	NA	NA	0	0	0	0	0	0
chr11_9430033_9435958	0.437042	1.61993	1.15563	0.250003	0.995233	1.31113	0	0	3.28655	0	1.57323
chr11_9430033_9438695	0	0	NA	NA	NA	0	0	0	0	0	0
chr11_9430033_9442245	0.437042	2.69613	2.0211	0.036532	0.995233	1.31113	0	0	3.96313	2.02333	2.10194
chr11_9441958_9446809	0	0	NA	NA	NA	0	0	0	0	0	0
chr11_9450087_9452550	0.192991	0.676127	0.222667	0.802837	0.995233	0.578972	0	0	1.29844	0	0.72994
chr11_9451221_9452550	0.662162	2.72728	1.3995	0.1459	0.995233	1.98649	0	0	2.77368	2.48486	2.92328
chr11_9451221_9455393	0	0	NA	NA	NA	0	0	0	0	0	0
chr11_9462002_9463744	0	0	NA	NA	NA	0	0	0	0	0	0
chr11_9492849_9501093	0	0	NA	NA	NA	0	0	0	0	0	0
chr11_9597435_9598810	0	0	NA	NA	NA	0	0	0	0	0	0
chr11_9983504_10011142	0	0	NA	NA	NA	0	0	0	0	0	0
chr12_100491143_100492319	0	0	NA	NA	NA	0	0	0	0	0	0
chr12_100598718_100601564	0	0.243313	0.157357	0.843372	0.995233	0	0	0	0	0	0.72994
chr12_100676721_100691953	0.192991	1.78332	1.43525	0.153124	0.995233	0.578972	0	0	2.42731	0.820731	2.10194
chr12_100985514_101005919	0	0	NA	NA	NA	0	0	0	0	0	0
chr12_101413812_101442179	0	0	NA	NA	NA	0	0	0	0	0	0
chr12_101727079_101728282	0.258272	0.677692	0.257284	0.777263	0.995233	0	0.774815	0	0	0.820731	1.21235
chr12_102107868_102110590	0	0	NA	NA	NA	0	0	0	0	0	0
chr12_102107868_102114032	0	0	NA	NA	NA	0	0	0	0	0	0
chr12_102291641_102295211	0	0.879687	0.584857	0.507213	0.995233	0	0	0	1.29844	1.34062	0
chr12_102301964_102308010	0.192991	1.56611	1.30753	0.192768	0.995233	0.578972	0	0	1.29844	2.66996	0.72994
chr12_102301964_102313979	0	0.676127	0.340667	0.677794	0.995233	0	0	0	1.29844	0	0.72994
chr12_102419752_102439897	0	0	NA	NA	NA	0	0	0	0	0	0
chr12_102433646_102439897	0	0	NA	NA	NA	0	0	0	0	0	0
chr12_102433646_102444069	0	0	NA	NA	NA	0	0	0	0	0	0
chr12_102542008_102559661	0.524319	1.34705	0.437149	0.662783	0.995233	1.57296	0	0	1.97058	1.34062	0.72994
chr12_104200100_104208899	0.192991	0	-0.213771	0.788477	0.995233	0.578972	0	0	0	0	0
chr12_104514178_104517201	0	0	NA	NA	NA	0	0	0	0	0	0
chr12_104682709_104683320	0.192991	0.243313	-0.0120842	0.987921	0.995233	0.578972	0	0	0	0	0.72994
chr12_104712691_104715094	0	0	NA	NA	NA	0	0	0	0	0	0
chr12_105303433_105322472	0	0	NA	NA	NA	0	0	0	0	0	0
chr12_105321751_105322472	0	0	NA	NA	NA	0	0	0	0	0	0
chr12_105385490_105389804	0	0.432813	0.157357	0.843372	0.995233	0	0	0	1.29844	0	0
chr12_106477642_106480663	0	0	NA	NA	NA	0	0	0	0	0	0
chr12_106477642_106500303	0	0	NA	NA	NA	0	0	0	0	0	0
chr12_106770137_106773917	0	0	NA	NA	NA	0	0	0	0	0	0
chr12_107177775_107219598	0.192991	0.836928	0.412538	0.655988	0.995233	0.578972	0	0	1.29844	0	1.21235
chr12_107236367_107245372	0	0.404115	0.302324	0.704956	0.995233	0	0	0	0	0	1.21235
chr12_107914264_107937916	0	0	NA	NA	NA	0	0	0	0	0	0
chr12_108136974_108140201	0	0	NA	NA	NA	0	0	0	0	0	0
chr12_109046048_109048186	0	0	NA	NA	NA	0	0	0	0	0	0
chr12_109072048_109095099	0	0	NA	NA	NA	0	0	0	0	0	0
chr12_109210814_109217137	0	0	NA	NA	NA	0	0	0	0	0	0
chr12_109212025_109212334	0	0	NA	NA	NA	0	0	0	0	0	0
chr12_109212025_109217137	0	0	NA	NA	NA	0	0	0	0	0	0
chr12_109242811_109246454	0	0	NA	NA	NA	0	0	0	0	0	0
chr12_109509417_109511337	0.524319	0.930437	0.165751	0.865614	0.995233	1.57296	0	0	1.97058	0.820731	0
chr12_110566755_110570441	0.192991	1.34705	0.924772	0.35228	0.995233	0.578972	0	0	1.97058	1.34062	0.72994
chr12_110729825_110734542	0	0	NA	NA	NA	0	0	0	0	0	0
chr12_110729825_110760877	0.963754	2.07208	0.299129	0.760917	0.995233	2.89126	0	0	2.77368	1.34062	2.10194
chr12_110778464_110780253	0	0	NA	NA	NA	0	0	0	0	0	0
chr12_110819557_110834257	0	0	NA	NA	NA	0	0	0	0	0	0
chr12_110826317_110834257	0	0	NA	NA	NA	0	0	0	0	0	0
chr12_110832906_110834257	0	0	NA	NA	NA	0	0	0	0	0	0
chr12_110832906_110839309	0	0	NA	NA	NA	0	0	0	0	0	0
chr12_110922883_110925748	0	0	NA	NA	NA	0	0	0	0	0	0
chr12_110974729_110983883	0.598163	1.62641	0.621068	0.536249	0.995233	1.79449	0	0	2.42731	1.72199	0.72994
chr12_110974729_110989773	0	0	NA	NA	NA	0	0	0	0	0	0
chr12_110975949_110989773	0	0	NA	NA	NA	0	0	0	0	0	0
chr12_110983685_110989773	0	0	NA	NA	NA	0	0	0	0	0	0
chr12_11126254_11199787	0.425388	0	-0.417572	0.601665	0.995233	0	1.27616	0	0	0	0
chr12_11181000_11199787	0	0	NA	NA	NA	0	0	0	0	0	0
chr12_11181000_11273779	0	0	NA	NA	NA	0	0	0	0	0	0
chr12_111855923_111856681	0	0	NA	NA	NA	0	0	0	0	0	0
chr12_11187381_11199787	0	0	NA	NA	NA	0	0	0	0	0	0
chr12_11187381_11273779	0	0	NA	NA	NA	0	0	0	0	0	0
chr12_111923069_111924628	0.437042	0.676127	-0.0240274	0.979534	0.995233	1.31113	0	0	1.29844	0	0.72994
chr12_111947353_111948386	0	0	NA	NA	NA	0	0	0	0	0	0
chr12_111990084_111993723	0	0	NA	NA	NA	0	0	0	0	0	0
chr12_111991962_111993723	0	0	NA	NA	NA	0	0	0	0	0	0
chr12_11199619_11273779	0	0	NA	NA	NA	0	0	0	0	0	0
chr12_11199619_11281962	0	0	NA	NA	NA	0	0	0	0	0	0
chr12_112086984_112087575	0	0	NA	NA	NA	0	0	0	0	0	0
chr12_112096540_112097149	0	0	NA	NA	NA	0	0	0	0	0	0
chr12_112116955_112121111	0	0.273577	0.157357	0.843372	0.995233	0	0	0	0	0.820731	0
chr12_112303054_112308984	0.437042	1.2819	0.694778	0.486783	0.995233	1.31113	0	0	0	2.27247	1.57323
chr12_112370390_112381173	0	0	NA	NA	NA	0	0	0	0	0	0
chr12_112371690_112381173	0	0	NA	NA	NA	0	0	0	0	0	0
chr12_112371690_112429693	0	0	NA	NA	NA	0	0	0	0	0	0
chr12_112498074_112499192	0	0	NA	NA	NA	0	0	0	0	0	0
chr12_112518864_112530940	0	0	NA	NA	NA	0	0	0	0	0	0
chr12_112667502_112669519	0	0	NA	NA	NA	0	0	0	0	0	0
chr12_112707508_112711599	0	0	NA	NA	NA	0	0	0	0	0	0
chr12_11273609_11276922	0	0	NA	NA	NA	0	0	0	0	0	0
chr12_11273609_11281962	0	0	NA	NA	NA	0	0	0	0	0	0
chr12_11273609_11285966	0	0	NA	NA	NA	0	0	0	0	0	0
chr12_112743868_112750951	0	0	NA	NA	NA	0	0	0	0	0	0
chr12_112757029_112757546	0	0	NA	NA	NA	0	0	0	0	0	0
chr12_112910748_112915819	0.437042	2.69726	1.82629	0.0596779	0.995233	1.31113	0	0	2.77368	2.66996	2.64813
chr12_112915455_112915819	0	0	NA	NA	NA	0	0	0	0	0	0
chr12_113541751_113542103	0	0	NA	NA	NA	0	0	0	0	0	0
chr12_1136914_1137738	0	0	NA	NA	NA	0	0	0	0	0	0
chr12_113758136_113759153	0.662162	0.65686	-0.149305	0.876767	0.995233	1.98649	0	0	1.97058	0	0
chr12_116434281_116435035	0.437042	0	-0.440742	0.581888	0.995233	1.31113	0	0	0	0	0
chr12_116534474_116549317	0	0	NA	NA	NA	0	0	0	0	0	0
chr12_116534474_116675510	0	0	NA	NA	NA	0	0	0	0	0	0
chr12_116668238_116675510	0	0	NA	NA	NA	0	0	0	0	0	0
chr12_116668338_116675510	0	0	NA	NA	NA	0	0	0	0	0	0
chr12_116674626_116675510	0	0	NA	NA	NA	0	0	0	0	0	0
chr12_116675273_116675510	0	0	NA	NA	NA	0	0	0	0	0	0
chr12_117271597_117274087	0	0	NA	NA	NA	0	0	0	0	0	0
chr12_117365828_117387511	0	0	NA	NA	NA	0	0	0	0	0	0
chr12_117365828_117402659	0	0	NA	NA	NA	0	0	0	0	0	0
chr12_117383169_117387511	0	0	NA	NA	NA	0	0	0	0	0	0
chr12_117383169_117402659	0	0	NA	NA	NA	0	0	0	0	0	0
chr12_117402502_117426674	0	0	NA	NA	NA	0	0	0	0	0	0
chr12_117423011_117426674	0	0	NA	NA	NA	0	0	0	0	0	0
chr12_117467827_117468639	0	0	NA	NA	NA	0	0	0	0	0	0
chr12_117476788_117484643	0	0	NA	NA	NA	0	0	0	0	0	0
chr12_118456877_118460164	0	0.432813	0.157357	0.843372	0.995233	0	0	0	1.29844	0	0
chr12_118456877_118463633	0	0.273577	0.157357	0.843372	0.995233	0	0	0	0	0.820731	0
chr12_11992074_12006495	0.192991	0	-0.213771	0.788477	0.995233	0.578972	0	0	0	0	0
chr12_120260624_120263172	0	0	NA	NA	NA	0	0	0	0	0	0
chr12_120260624_120272032	0	0	NA	NA	NA	0	0	0	0	0	0
chr12_120260624_120288079	0	0	NA	NA	NA	0	0	0	0	0	0
chr12_120287978_120295502	0	0	NA	NA	NA	0	0	0	0	0	0
chr12_120287978_120313985	0	0	NA	NA	NA	0	0	0	0	0	0
chr12_12037379_12038960	0.524319	1.14752	0.432887	0.663734	0.995233	1.57296	0	0	0	1.34062	2.10194
chr12_120580311_120580745	0	0	NA	NA	NA	0	0	0	0	0	0
chr12_120588949_120589195	0	0	NA	NA	NA	0	0	0	0	0	0
chr12_120592774_120593523	0	0	NA	NA	NA	0	0	0	0	0	0
chr12_120995085_120995485	0	0.243313	0.157357	0.843372	0.995233	0	0	0	0	0	0.72994
chr12_121002875_121004783	2.77631	2.39052	-0.278009	0.745142	0.995233	2.98422	2.57937	2.76535	3.28655	2.02333	1.86167
chr12_121154431_121154845	0	0	NA	NA	NA	0	0	0	0	0	0
chr12_121220458_121222396	0.524319	1.70745	0.763883	0.446849	0.995233	1.57296	0	0	1.29844	1.72199	2.10194
chr12_121220458_121229360	0	0	NA	NA	NA	0	0	0	0	0	0
chr12_122181535_122190129	0	0.432813	0.157357	0.843372	0.995233	0	0	0	1.29844	0	0
chr12_122181535_122199644	0	0	NA	NA	NA	0	0	0	0	0	0
chr12_122218778_122219098	2.55327	2.19584	-0.415641	0.639137	0.995233	1.98649	3.71001	1.96331	1.29844	2.98125	2.30784
chr12_122332645_122341013	0	0	NA	NA	NA	0	0	0	0	0	0
chr12_122716677_122717515	0	0	NA	NA	NA	0	0	0	0	0	0
chr12_122720333_122723271	0.330335	1.87653	1.24239	0.215598	0.995233	0.991005	0	0	2.42731	1.34062	1.86167
chr12_122734418_122735646	0	0	NA	NA	NA	0	0	0	0	0	0
chr12_122745808_122748746	0	0	NA	NA	NA	0	0	0	0	0	0
chr12_122773036_122801402	0	0	NA	NA	NA	0	0	0	0	0	0
chr12_122968007_122983410	0	0	NA	NA	NA	0	0	0	0	0	0
chr12_122973933_122977336	0	0	NA	NA	NA	0	0	0	0	0	0
chr12_12301876_12303972	0	0	NA	NA	NA	0	0	0	0	0	0
chr12_123030723_123032516	0	0	NA	NA	NA	0	0	0	0	0	0
chr12_123030723_123036243	0	0	NA	NA	NA	0	0	0	0	0	0
chr12_123041931_123042236	0.330335	0.676127	0.088375	0.923303	0.995233	0.991005	0	0	1.29844	0	0.72994
chr12_123068825_123073363	0	0	NA	NA	NA	0	0	0	0	0	0
chr12_123102890_123107154	0.618379	1.52893	0.930495	0.35368	0.995233	0.578972	1.27616	0	0	2.48486	2.10194
chr12_123262038_123265877	0	0	NA	NA	NA	0	0	0	0	0	0
chr12_12332744_12340053	0	0	NA	NA	NA	0	0	0	0	0	0
chr12_12339857_12356334	0	0	NA	NA	NA	0	0	0	0	0	0
chr12_123651202_123665757	0	0	NA	NA	NA	0	0	0	0	0	0
chr12_123678933_123679148	0.192991	0	-0.213771	0.788477	0.995233	0.578972	0	0	0	0	0
chr12_123678933_123682881	0	0.949704	0.637604	0.482539	0.995233	0	0	0	1.29844	0.820731	0.72994
chr12_123798167_123800207	0	0	NA	NA	NA	0	0	0	0	0	0
chr12_123818600_123825635	0	0	NA	NA	NA	0	0	0	0	0	0
chr12_12397196_12397589	0	0	NA	NA	NA	0	0	0	0	0	0
chr12_12397196_12412829	0	0	NA	NA	NA	0	0	0	0	0	0
chr12_123983091_123984083	0	0	NA	NA	NA	0	0	0	0	0	0
chr12_124071294_124074996	0	0	NA	NA	NA	0	0	0	0	0	0
chr12_124102305_124103384	0	0	NA	NA	NA	0	0	0	0	0	0
chr12_124123811_124137282	0	0	NA	NA	NA	0	0	0	0	0	0
chr12_124130002_124137282	0	0	NA	NA	NA	0	0	0	0	0	0
chr12_124172598_124177270	0	0	NA	NA	NA	0	0	0	0	0	0
chr12_124882665_124934413	0	0	NA	NA	NA	0	0	0	0	0	0
chr12_124904503_124915333	0	0	NA	NA	NA	0	0	0	0	0	0
chr12_124904503_124934413	0	0	NA	NA	NA	0	0	0	0	0	0
chr12_124950719_124971114	0	0	NA	NA	NA	0	0	0	0	0	0
chr12_125436944_125438757	0.330335	0.432813	-0.13101	0.877001	0.995233	0.991005	0	0	1.29844	0	0
chr12_125587225_125591814	0.598163	0.51689	-0.329401	0.728007	0.995233	1.79449	0	0	0	0.820731	0.72994
chr12_12672796_12674397	0	0	NA	NA	NA	0	0	0	0	0	0
chr12_12788711_12788908	0	0	NA	NA	NA	0	0	0	0	0	0
chr12_129293333_129299615	0	0	NA	NA	NA	0	0	0	0	0	0
chr12_129299320_129299615	0	0	NA	NA	NA	0	0	0	0	0	0
chr12_12992008_12999533	0	0	NA	NA	NA	0	0	0	0	0	0
chr12_13061177_13062105	1.36017	3.95523	1.55152	0.0712719	0.995233	3.3057	0.774815	0	3.28655	4.15855	4.4206
chr12_133083838_133084936	0	0	NA	NA	NA	0	0	0	0	0	0
chr12_133084739_133104574	0	0	NA	NA	NA	0	0	0	0	0	0
chr12_133084739_133124618	0.330335	0	-0.340494	0.669749	0.995233	0.991005	0	0	0	0	0
chr12_133245397_133248908	0.524319	0.432813	-0.310085	0.73107	0.995233	1.57296	0	0	1.29844	0	0
chr12_133291444_133294706	0.330335	0.243313	-0.145737	0.855711	0.995233	0.991005	0	0	0	0	0.72994
chr12_133310971_133312098	0	0	NA	NA	NA	0	0	0	0	0	0
chr12_133331261_133331719	0	0	NA	NA	NA	0	0	0	0	0	0
chr12_133357384_133359079	0	0	NA	NA	NA	0	0	0	0	0	0
chr12_133393126_133398897	0	0	NA	NA	NA	0	0	0	0	0	0
chr12_133428204_133430159	0	0	NA	NA	NA	0	0	0	0	0	0
chr12_133624541_133625434	0.330335	0.51689	0.0181467	0.983648	0.995233	0.991005	0	0	0	0.820731	0.72994
chr12_133768075_133768589	0	0	NA	NA	NA	0	0	0	0	0	0
chr12_13906251_13906849	0	0	NA	NA	NA	0	0	0	0	0	0
chr12_14018732_14019160	0	0	NA	NA	NA	0	0	0	0	0	0
chr12_15834160_15866259	0	0	NA	NA	NA	0	0	0	0	0	0
chr12_1887020_1893239	0	0.432813	0.157357	0.843372	0.995233	0	0	0	1.29844	0	0
chr12_19406874_19410471	0	0	NA	NA	NA	0	0	0	0	0	0
chr12_19406874_19413955	0	0	NA	NA	NA	0	0	0	0	0	0
chr12_19406874_19418784	0	0	NA	NA	NA	0	0	0	0	0	0
chr12_19496257_19501453	0.662162	0.573995	-0.198953	0.835179	0.995233	1.98649	0	0	0	1.72199	0
chr12_19498776_19501453	0.662162	2.15238	0.894347	0.366642	0.995233	1.98649	0	0	2.42731	1.72199	2.30784
chr12_19498776_19506936	0	0	NA	NA	NA	0	0	0	0	0	0
chr12_19615444_19619784	0	0	NA	NA	NA	0	0	0	0	0	0
chr12_19615444_19626289	0	0.949704	0.637604	0.482539	0.995233	0	0	0	1.29844	0.820731	0.72994
chr12_19615444_19636987	0	0	NA	NA	NA	0	0	0	0	0	0
chr12_19615444_19646920	0.192991	0.65686	0.32404	0.717516	0.995233	0.578972	0	0	1.97058	0	0
chr12_19615444_19653155	0	0	NA	NA	NA	0	0	0	0	0	0
chr12_19626182_19646920	0	0	NA	NA	NA	0	0	0	0	0	0
chr12_19626182_19653155	0.524319	1.29117	0.734962	0.463555	0.995233	1.57296	0	0	3.05279	0.820731	0
chr12_19646734_19646920	0	0	NA	NA	NA	0	0	0	0	0	0
chr12_19646734_19653155	0	0	NA	NA	NA	0	0	0	0	0	0
chr12_19705787_19706326	4.09166	4.19657	-0.122911	0.866046	0.995233	4.93674	2.74152	4.59673	4.42188	3.88688	4.28095
chr12_20076132_20127661	0	0	NA	NA	NA	0	0	0	0	0	0
chr12_20766377_20774345	0.192991	0.432813	-0.0123831	0.987718	0.995233	0.578972	0	0	1.29844	0	0
chr12_20769164_20787990	0	0	NA	NA	NA	0	0	0	0	0	0
chr12_20774230_20792891	0	0	NA	NA	NA	0	0	0	0	0	0
chr12_20790034_20803534	0.192991	0	-0.213771	0.788477	0.995233	0.578972	0	0	0	0	0
chr12_20790034_20807139	0	0	NA	NA	NA	0	0	0	0	0	0
chr12_21028169_21054401	0	0	NA	NA	NA	0	0	0	0	0	0
chr12_22631247_22637822	0	0	NA	NA	NA	0	0	0	0	0	0
chr12_22637631_22643152	0	0	NA	NA	NA	0	0	0	0	0	0
chr12_22643057_22659753	0	0	NA	NA	NA	0	0	0	0	0	0
chr12_22646157_22659753	0	0	NA	NA	NA	0	0	0	0	0	0
chr12_22796697_22796956	0.976908	1.50024	0.123632	0.901391	0.995233	2.15591	0.774815	0	1.29844	1.34062	1.86167
chr12_22796697_22826594	0	0	NA	NA	NA	0	0	0	0	0	0
chr12_22811948_22826594	1.80288	2.97093	0.462657	0.595172	0.995233	2.15591	3.25273	0	3.28655	2.83398	2.79226
chr12_27075549_27081838	0.330335	1.72686	1.1579	0.249064	0.995233	0.991005	0	0	2.42731	2.02333	0.72994
chr12_27077288_27081838	0	0	NA	NA	NA	0	0	0	0	0	0
chr12_27132717_27143560	0	0	NA	NA	NA	0	0	0	0	0	0
chr12_27143383_27152609	0	0	NA	NA	NA	0	0	0	0	0	0
chr12_27143383_27156323	0	0	NA	NA	NA	0	0	0	0	0	0
chr12_27148170_27156323	0	0	NA	NA	NA	0	0	0	0	0	0
chr12_27149675_27152609	0	0	NA	NA	NA	0	0	0	0	0	0
chr12_27183091_27185614	0	0.243313	0.157357	0.843372	0.995233	0	0	0	0	0	0.72994
chr12_27183667_27185614	0	0	NA	NA	NA	0	0	0	0	0	0
chr12_27199087_27219830	0	0	NA	NA	NA	0	0	0	0	0	0
chr12_27199091_27219159	0	0	NA	NA	NA	0	0	0	0	0	0
chr12_27199091_27219830	2.86191	1.70902	-1.05813	0.235767	0.995233	2.98422	1.6475	3.95399	1.29844	1.34062	2.488
chr12_27521195_27523163	0.330335	0	-0.340494	0.669749	0.995233	0.991005	0	0	0	0	0
chr12_27521195_27529349	0	0	NA	NA	NA	0	0	0	0	0	0
chr12_27521195_27533337	0	0	NA	NA	NA	0	0	0	0	0	0
chr12_27533180_27543172	0	1.63497	1.39723	0.160356	0.995233	0	0	0	1.97058	1.72199	1.21235
chr12_27731085_27788048	0	0	NA	NA	NA	0	0	0	0	0	0
chr12_27786295_27788048	0	0	NA	NA	NA	0	0	0	0	0	0
chr12_27824364_27827154	0.588607	0.404115	-0.174078	0.849789	0.995233	0.991005	0.774815	0	0	0	1.21235
chr12_27867713_27877119	0	0	NA	NA	NA	0	0	0	0	0	0
chr12_27867713_27878600	0	0	NA	NA	NA	0	0	0	0	0	0
chr12_27867713_27890541	0	0	NA	NA	NA	0	0	0	0	0	0
chr12_27872741_27877119	0	0	NA	NA	NA	0	0	0	0	0	0
chr12_28378232_28379132	0	0	NA	NA	NA	0	0	0	0	0	0
chr12_28378728_28412375	0.598163	0.620557	-0.043398	0.963709	0.995233	1.79449	0	0	0	0	1.86167
chr12_28378728_28460682	0	0	NA	NA	NA	0	0	0	0	0	0
chr12_28408514_28412375	0.192991	0.524411	0.252567	0.767116	0.995233	0.578972	0	0	0	0	1.57323
chr12_28408514_28460682	0	0	NA	NA	NA	0	0	0	0	0	0
chr12_28408514_28544344	0	0	NA	NA	NA	0	0	0	0	0	0
chr12_28457559_28544344	0.654437	0	-0.247408	0.764474	0.995233	0	0	1.96331	0	0	0
chr12_28458582_28460682	0.695314	0.620557	0.0117835	0.990319	0.996436	1.31113	0.774815	0	0	0	1.86167
chr12_28458582_28544344	0	0	NA	NA	NA	0	0	0	0	0	0
chr12_28515371_28544344	0.437042	1.6402	1.10416	0.271726	0.995233	1.31113	0	0	0	2.27247	2.64813
chr12_2929252_2930958	0	0	NA	NA	NA	0	0	0	0	0	0
chr12_2931960_2933418	0	0	NA	NA	NA	0	0	0	0	0	0
chr12_29786080_29813818	0	0	NA	NA	NA	0	0	0	0	0	0
chr12_29812813_29813818	0	0	NA	NA	NA	0	0	0	0	0	0
chr12_29812813_29814312	0	0	NA	NA	NA	0	0	0	0	0	0
chr12_29904599_29911710	0	0	NA	NA	NA	0	0	0	0	0	0
chr12_29904599_29921008	0	0	NA	NA	NA	0	0	0	0	0	0
chr12_3018695_3031568	0	0	NA	NA	NA	0	0	0	0	0	0
chr12_30818154_30819185	0	0	NA	NA	NA	0	0	0	0	0	0
chr12_3103904_3104158	0.192991	2.69726	2.30727	0.0181932	0.995233	0.578972	0	0	2.77368	2.66996	2.64813
chr12_31595709_31600703	0	0	NA	NA	NA	0	0	0	0	0	0
chr12_31648744_31652605	0	0	NA	NA	NA	0	0	0	0	0	0
chr12_32458631_32459056	0	0	NA	NA	NA	0	0	0	0	0	0
chr12_32751431_32754357	0	0	NA	NA	NA	0	0	0	0	0	0
chr12_32751431_32764217	0	0	NA	NA	NA	0	0	0	0	0	0
chr12_32760891_32764217	0	0	NA	NA	NA	0	0	0	0	0	0
chr12_32861087_32866305	0	0	NA	NA	NA	0	0	0	0	0	0
chr12_32861087_32871697	0	0	NA	NA	NA	0	0	0	0	0	0
chr12_32866143_32875567	0	0	NA	NA	NA	0	0	0	0	0	0
chr12_32871577_32875567	0	0	NA	NA	NA	0	0	0	0	0	0
chr12_39154649_39170103	0	0	NA	NA	NA	0	0	0	0	0	0
chr12_39223181_39242464	0	0	NA	NA	NA	0	0	0	0	0	0
chr12_39223181_39268313	0	0	NA	NA	NA	0	0	0	0	0	0
chr12_42604157_42604482	0	0	NA	NA	NA	0	0	0	0	0	0
chr12_42748963_42792796	0	0	NA	NA	NA	0	0	0	0	0	0
chr12_42768665_42792796	0.524319	2.22208	1.26004	0.203376	0.995233	1.57296	0	0	1.97058	2.83398	1.86167
chr12_44124409_44125561	0	0	NA	NA	NA	0	0	0	0	0	0
chr12_44537328_44605170	0	0	NA	NA	NA	0	0	0	0	0	0
chr12_45097509_45108524	0	0	NA	NA	NA	0	0	0	0	0	0
chr12_45771836_45784281	0	0	NA	NA	NA	0	0	0	0	0	0
chr12_46205201_46215270	0	0.446873	0.330042	0.679747	0.995233	0	0	0	0	1.34062	0
chr12_46230372_46233279	0.330335	0	-0.340494	0.669749	0.995233	0.991005	0	0	0	0	0
chr12_4626227_4628046	0.695314	2.64636	1.7434	0.0674564	0.995233	1.31113	0.774815	0	2.77368	1.72199	3.44341
chr12_46285563_46287504	0.192991	0.432813	-0.0123831	0.987718	0.995233	0.578972	0	0	1.29844	0	0
chr12_46339032_46345510	0	0.676127	0.340667	0.677794	0.995233	0	0	0	1.29844	0	0.72994
chr12_46591503_46592526	0.695314	2.1041	1.09237	0.267027	0.995233	1.31113	0.774815	0	2.42731	2.02333	1.86167
chr12_46622936_46633676	0	0	NA	NA	NA	0	0	0	0	0	0
chr12_46622936_46637097	0	0	NA	NA	NA	0	0	0	0	0	0
chr12_46622936_46648719	0	0	NA	NA	NA	0	0	0	0	0	0
chr12_46633462_46637097	0	0	NA	NA	NA	0	0	0	0	0	0
chr12_46633462_46648719	0	0	NA	NA	NA	0	0	0	0	0	0
chr12_47497896_47501947	0.258272	0	-0.224361	0.778305	0.995233	0	0.774815	0	0	0	0
chr12_48134425_48137459	0	0	NA	NA	NA	0	0	0	0	0	0
chr12_48477374_48491907	0	0.446873	0.330042	0.679747	0.995233	0	0	0	0	1.34062	0
chr12_48482584_48491907	0	0	NA	NA	NA	0	0	0	0	0	0
chr12_48490126_48495299	0	0	NA	NA	NA	0	0	0	0	0	0
chr12_49053688_49054402	0	0	NA	NA	NA	0	0	0	0	0	0
chr12_49227060_49228280	0	0	NA	NA	NA	0	0	0	0	0	0
chr12_49317565_49319461	3.54221	3.08062	-0.465466	0.543903	0.995233	3.23179	4.11706	3.27779	2.77368	3.11487	3.35332
chr12_49333438_49334971	0	0	NA	NA	NA	0	0	0	0	0	0
chr12_49765011_49884514	0.192991	0.879687	0.458465	0.623251	0.995233	0.578972	0	0	1.29844	1.34062	0
chr12_49854553_49854820	0	0	NA	NA	NA	0	0	0	0	0	0
chr12_49854553_49884514	0.330335	0.404115	-0.00184386	0.998252	0.998535	0.991005	0	0	0	0	1.21235
chr12_49880033_49884514	6.65641	5.38293	-1.43197	0.0351145	0.995233	5.78963	6.08388	8.09571	5.28356	5.21008	5.65514
chr12_49890616_49893988	0	0	NA	NA	NA	0	0	0	0	0	0
chr12_50055749_50062337	0	0	NA	NA	NA	0	0	0	0	0	0
chr12_50384467_50386438	0	0	NA	NA	NA	0	0	0	0	0	0
chr12_50385781_50386438	0	0	NA	NA	NA	0	0	0	0	0	0
chr12_50488220_50490755	0.618379	1.4041	0.525043	0.601272	0.995233	0.578972	1.27616	0	1.29844	1.34062	1.57323
chr12_50821545_50822873	0	0.243313	0.157357	0.843372	0.995233	0	0	0	0	0	0.72994
chr12_50821545_50824353	0	0	NA	NA	NA	0	0	0	0	0	0
chr12_50821545_50829407	0	0	NA	NA	NA	0	0	0	0	0	0
chr12_50821545_50835426	0	0	NA	NA	NA	0	0	0	0	0	0
chr12_50821548_50824353	0	0.243313	0.157357	0.843372	0.995233	0	0	0	0	0	0.72994
chr12_50824278_50829407	0	0	NA	NA	NA	0	0	0	0	0	0
chr12_50824278_50831621	0	1.11051	0.813661	0.385862	0.995233	0	0	0	1.29844	0.820731	1.21235
chr12_50824278_50835426	0	0	NA	NA	NA	0	0	0	0	0	0
chr12_50829271_50835426	0	0	NA	NA	NA	0	0	0	0	0	0
chr12_50829271_50848200	0.192991	1.32599	1.00459	0.313667	0.995233	0.578972	0	0	2.42731	0.820731	0.72994
chr12_50847243_50848200	0	0	NA	NA	NA	0	0	0	0	0	0
chr12_50848097_50855130	0	0	NA	NA	NA	0	0	0	0	0	0
chr12_51173923_51189792	0	1.40704	1.21204	0.217407	0.995233	0	0	0	1.29844	0.820731	2.10194
chr12_51173923_51203372	0	1.10291	1.07192	0.265159	0.995233	0	0	0	0	0.820731	2.488
chr12_51173923_51208222	0	0	NA	NA	NA	0	0	0	0	0	0
chr12_51402259_51404549	0.192991	1.49929	1.1452	0.253067	0.995233	0.578972	0	0	2.42731	1.34062	0.72994
chr12_51442817_51450285	0.814894	2.6114	1.06947	0.266692	0.995233	2.44468	0	0	3.48767	2.48486	1.86167
chr12_51467606_51467865	0	0	NA	NA	NA	0	0	0	0	0	0
chr12_514677_527802	0	0.243313	0.157357	0.843372	0.995233	0	0	0	0	0	0.72994
chr12_518534_527802	0	0	NA	NA	NA	0	0	0	0	0	0
chr12_52056548_52056877	0	0	NA	NA	NA	0	0	0	0	0	0
chr12_52139687_52145377	0	0	NA	NA	NA	0	0	0	0	0	0
chr12_5269473_5281055	0	0	NA	NA	NA	0	0	0	0	0	0
chr12_53421566_53421972	0.192991	0.797988	0.450475	0.62738	0.995233	0.578972	0	0	0	0.820731	1.57323
chr12_53670404_53671011	0	0	NA	NA	NA	0	0	0	0	0	0
chr12_53670404_53671744	0	0	NA	NA	NA	0	0	0	0	0	0
chr12_56493432_56494029	0.524319	0	-0.513378	0.52235	0.995233	1.57296	0	0	0	0	0
chr12_56527201_56528212	0	0	NA	NA	NA	0	0	0	0	0	0
chr12_56669780_56676775	0	0	NA	NA	NA	0	0	0	0	0	0
chr12_56676204_56676775	0	0	NA	NA	NA	0	0	0	0	0	0
chr12_56824665_56826308	0	0	NA	NA	NA	0	0	0	0	0	0
chr12_56871444_56872046	0	0	NA	NA	NA	0	0	0	0	0	0
chr12_56997143_56999111	0	0	NA	NA	NA	0	0	0	0	0	0
chr12_56998001_56999111	0	0	NA	NA	NA	0	0	0	0	0	0
chr12_57064059_57066849	0	0	NA	NA	NA	0	0	0	0	0	0
chr12_57127931_57133147	0	0	NA	NA	NA	0	0	0	0	0	0
chr12_57135219_57137907	0	0	NA	NA	NA	0	0	0	0	0	0
chr12_57463017_57466695	0	0	NA	NA	NA	0	0	0	0	0	0
chr12_57648631_57650294	0	0	NA	NA	NA	0	0	0	0	0	0
chr12_57891940_57892406	0	0	NA	NA	NA	0	0	0	0	0	0
chr12_58340778_58347472	0	0	NA	NA	NA	0	0	0	0	0	0
chr12_60098553_60098799	0.192991	0	-0.213771	0.788477	0.995233	0.578972	0	0	0	0	0
chr12_62877950_62895478	0	0	NA	NA	NA	0	0	0	0	0	0
chr12_62892699_62895478	0	0	NA	NA	NA	0	0	0	0	0	0
chr12_63083479_63114069	0	0	NA	NA	NA	0	0	0	0	0	0
chr12_6442235_6443410	1.84585	2.74791	0.0712004	0.936754	0.995233	3.89005	1.6475	0	1.97058	3.34988	2.92328
chr12_64456697_64458999	0	0	NA	NA	NA	0	0	0	0	0	0
chr12_64456697_64480806	0	0	NA	NA	NA	0	0	0	0	0	0
chr12_64803742_64810534	0.524319	1.4041	0.45384	0.650912	0.995233	1.57296	0	0	1.29844	1.34062	1.57323
chr12_65702309_65722383	0	0	NA	NA	NA	0	0	0	0	0	0
chr12_65702309_65762806	0	0	NA	NA	NA	0	0	0	0	0	0
chr12_65720606_65762806	0	0	NA	NA	NA	0	0	0	0	0	0
chr12_6618883_6620418	0.718636	1.8079	0.524042	0.600205	0.995233	2.15591	0	0	1.29844	2.02333	2.10194
chr12_6630152_6631203	0	0	NA	NA	NA	0	0	0	0	0	0
chr12_6630964_6631203	0.524319	0.273577	-0.345109	0.691761	0.995233	1.57296	0	0	0	0.820731	0
chr12_6630964_6632512	0	0	NA	NA	NA	0	0	0	0	0	0
chr12_6764804_6765964	0	0	NA	NA	NA	0	0	0	0	0	0
chr12_6859014_6859932	0	0	NA	NA	NA	0	0	0	0	0	0
chr12_69084411_69094633	0	0	NA	NA	NA	0	0	0	0	0	0
chr12_69090599_69096564	0	0	NA	NA	NA	0	0	0	0	0	0
chr12_69109407_69119576	0.524319	1.80991	0.929767	0.353628	0.995233	1.57296	0	0	2.42731	2.27247	0.72994
chr12_69109407_69121169	0	0.879687	0.584857	0.507213	0.995233	0	0	0	1.29844	1.34062	0
chr12_69210592_69218431	0	0.446873	0.330042	0.679747	0.995233	0	0	0	0	1.34062	0
chr12_69644909_69656342	0.963754	2.1041	0.258842	0.792112	0.995233	2.89126	0	0	2.42731	2.02333	1.86167
chr12_6978422_6978937	6.06887	8.14959	1.82783	0.00796856	0.995233	6.02662	7.14018	5.0398	6.96657	8.22444	9.25775
chr12_69924070_69925836	0	0	NA	NA	NA	0	0	0	0	0	0
chr12_69983265_69985939	0	0.70639	0.371025	0.654286	0.995233	0	0	0	1.29844	0.820731	0
chr12_69983265_69987393	0	0	NA	NA	NA	0	0	0	0	0	0
chr12_69985839_69987393	1.8064	4.50253	1.89887	0.0167016	0.995233	3.23179	2.1874	0	4.32013	5.29701	3.89044
chr12_70149164_70150443	0	0.273577	0.157357	0.843372	0.995233	0	0	0	0	0.820731	0
chr12_70193989_70195501	0	0	NA	NA	NA	0	0	0	0	0	0
chr12_70671912_70704797	0	0	NA	NA	NA	0	0	0	0	0	0
chr12_70671912_70713144	0	0	NA	NA	NA	0	0	0	0	0	0
chr12_70901675_70916410	0	0	NA	NA	NA	0	0	0	0	0	0
chr12_70903992_70916410	0	0	NA	NA	NA	0	0	0	0	0	0
chr12_7171571_7172603	0	0	NA	NA	NA	0	0	0	0	0	0
chr12_72020040_72022817	0	0	NA	NA	NA	0	0	0	0	0	0
chr12_72051306_72054207	0	0	NA	NA	NA	0	0	0	0	0	0
chr12_72052410_72054207	0	0	NA	NA	NA	0	0	0	0	0	0
chr12_72163580_72167802	0	0	NA	NA	NA	0	0	0	0	0	0
chr12_76461151_76468019	0	0	NA	NA	NA	0	0	0	0	0	0
chr12_76844631_76881398	0	0	NA	NA	NA	0	0	0	0	0	0
chr12_77214838_77216311	0	0	NA	NA	NA	0	0	0	0	0	0
chr12_7980091_8083238	0	0	NA	NA	NA	0	0	0	0	0	0
chr12_79968646_79990438	0	0	NA	NA	NA	0	0	0	0	0	0
chr12_79986391_79990438	0	0	NA	NA	NA	0	0	0	0	0	0
chr12_8082280_8083238	0	0	NA	NA	NA	0	0	0	0	0	0
chr12_8083076_8084081	0	0	NA	NA	NA	0	0	0	0	0	0
chr12_8083841_8084081	0	0	NA	NA	NA	0	0	0	0	0	0
chr12_82763166_82796909	0	0	NA	NA	NA	0	0	0	0	0	0
chr12_82780582_82796909	0	0.243313	0.157357	0.843372	0.995233	0	0	0	0	0	0.72994
chr12_83250789_83251359	0	0	NA	NA	NA	0	0	0	0	0	0
chr12_8808011_8808426	0	0	NA	NA	NA	0	0	0	0	0	0
chr12_8866407_8866637	0.598163	0	-0.577458	0.476538	0.995233	1.79449	0	0	0	0	0
chr12_89885713_89891119	0	0	NA	NA	NA	0	0	0	0	0	0
chr12_90049456_90049884	0	0	NA	NA	NA	0	0	0	0	0	0
chr12_922808_939326	0	0	NA	NA	NA	0	0	0	0	0	0
chr12_93192668_93192862	0	0	NA	NA	NA	0	0	0	0	0	0
chr12_936208_939326	0	0	NA	NA	NA	0	0	0	0	0	0
chr12_95434252_95443009	0	0	NA	NA	NA	0	0	0	0	0	0
chr12_95451329_95451654	0	0	NA	NA	NA	0	0	0	0	0	0
chr12_95645716_95660408	0	0	NA	NA	NA	0	0	0	0	0	0
chr12_96076483_96077487	0	0	NA	NA	NA	0	0	0	0	0	0
chr12_96707099_96728643	0	0	NA	NA	NA	0	0	0	0	0	0
chr12_96717726_96728643	0	0	NA	NA	NA	0	0	0	0	0	0
chr12_98921664_98931350	0.192991	0	-0.213771	0.788477	0.995233	0.578972	0	0	0	0	0
chr12_98989211_98989439	0.437042	0.573995	0.0639769	0.944407	0.995233	1.31113	0	0	0	1.72199	0
chr12_99071203_99080651	0	0	NA	NA	NA	0	0	0	0	0	0
chr13_100909849_100925600	0	0	NA	NA	NA	0	0	0	0	0	0
chr13_100925450_100992513	0.930633	2.81292	1.01185	0.287039	0.995233	2.7919	0	0	1.97058	3.11487	3.35332
chr13_100953714_100962162	1.36017	3.39738	1.06273	0.231871	0.995233	3.3057	0.774815	0	2.77368	3.81015	3.6083
chr13_100953714_100992513	0	0	NA	NA	NA	0	0	0	0	0	0
chr13_100959446_100992513	0	0	NA	NA	NA	0	0	0	0	0	0
chr13_100982815_100992513	0.949707	2.44057	1.32004	0.164926	0.995233	1.57296	1.27616	0	1.29844	2.66996	3.35332
chr13_101881744_101944717	0	0	NA	NA	NA	0	0	0	0	0	0
chr13_101910794_101944717	0	0	NA	NA	NA	0	0	0	0	0	0
chr13_101936284_101944717	0	0	NA	NA	NA	0	0	0	0	0	0
chr13_101997617_102051516	0	0	NA	NA	NA	0	0	0	0	0	0
chr13_102047534_102051516	0	0	NA	NA	NA	0	0	0	0	0	0
chr13_103275227_103279516	0	0	NA	NA	NA	0	0	0	0	0	0
chr13_103275227_103280274	0	0	NA	NA	NA	0	0	0	0	0	0
chr13_103468778_103474509	0	0	NA	NA	NA	0	0	0	0	0	0
chr13_108269565_108287727	0	0	NA	NA	NA	0	0	0	0	0	0
chr13_111274563_111276626	0	0	NA	NA	NA	0	0	0	0	0	0
chr13_111274563_111279894	0.76917	1.11051	-0.184926	0.853705	0.995233	2.30751	0	0	1.29844	0.820731	1.21235
chr13_111303381_111319820	0	0	NA	NA	NA	0	0	0	0	0	0
chr13_111303381_111335481	0	0	NA	NA	NA	0	0	0	0	0	0
chr13_111870026_111885640	0	0	NA	NA	NA	0	0	0	0	0	0
chr13_111870026_111896641	0	0	NA	NA	NA	0	0	0	0	0	0
chr13_113158346_113181798	0.524319	1.05242	0.371725	0.707842	0.995233	1.57296	0	0	2.42731	0	0.72994
chr13_113170754_113176823	0.437042	1.19455	0.568859	0.567104	0.995233	1.31113	0	0	0	1.72199	1.86167
chr13_113170754_113181798	0	0	NA	NA	NA	0	0	0	0	0	0
chr13_113669077_113679072	0.192991	0	-0.213771	0.788477	0.995233	0.578972	0	0	0	0	0
chr13_113669077_113699675	0	0	NA	NA	NA	0	0	0	0	0	0
chr13_113845186_113854830	0	0	NA	NA	NA	0	0	0	0	0	0
chr13_113850495_113854830	0.895061	3.52336	1.6069	0.0772477	0.995233	2.68518	0	0	3.48767	3.7291	3.35332
chr13_114164553_114175048	0.662162	1.78332	0.655167	0.512869	0.995233	1.98649	0	0	2.42731	0.820731	2.10194
chr13_114164553_114188555	1.21133	0.769281	-0.213989	0.831226	0.995233	1.98649	1.6475	0	0	0	2.30784
chr13_114164553_114193822	0	0	NA	NA	NA	0	0	0	0	0	0
chr13_114174931_114188555	0	0	NA	NA	NA	0	0	0	0	0	0
chr13_114174931_114193822	1.18891	1.93307	0.154712	0.873517	0.995233	2.7919	0.774815	0	1.97058	1.34062	2.488
chr13_114541042_114542823	0	0	NA	NA	NA	0	0	0	0	0	0
chr13_114806476_114839312	0.192991	0	-0.213771	0.788477	0.995233	0.578972	0	0	0	0	0
chr13_114817527_114839312	0	0	NA	NA	NA	0	0	0	0	0	0
chr13_20235838_20244503	0.451262	1.16161	0.734882	0.462425	0.995233	0.578972	0.774815	0	0	2.27247	1.21235
chr13_20279802_20283739	0	0	NA	NA	NA	0	0	0	0	0	0
chr13_20325411_20333558	1.8776	3.64349	1.06536	0.193938	0.995233	2.89126	2.74152	0	3.28655	3.95974	3.68417
chr13_20425495_20426330	0	0	NA	NA	NA	0	0	0	0	0	0
chr13_20576990_20580726	0	0	NA	NA	NA	0	0	0	0	0	0
chr13_21305980_21306260	0	0.243313	0.157357	0.843372	0.995233	0	0	0	0	0	0.72994
chr13_21436856_21442840	0	0	NA	NA	NA	0	0	0	0	0	0
chr13_21619824_21620369	0	0	NA	NA	NA	0	0	0	0	0	0
chr13_21746478_21746820	0	0	NA	NA	NA	0	0	0	0	0	0
chr13_21955573_21965993	0	0	NA	NA	NA	0	0	0	0	0	0
chr13_22088492_22113827	0	0	NA	NA	NA	0	0	0	0	0	0
chr13_22088492_22122056	0	0	NA	NA	NA	0	0	0	0	0	0
chr13_22095384_22113827	0	0	NA	NA	NA	0	0	0	0	0	0
chr13_22095384_22122056	0	0	NA	NA	NA	0	0	0	0	0	0
chr13_24410379_24415627	0	0	NA	NA	NA	0	0	0	0	0	0
chr13_24796957_24798720	0	0	NA	NA	NA	0	0	0	0	0	0
chr13_25049610_25052414	0	0	NA	NA	NA	0	0	0	0	0	0
chr13_25051839_25052414	0	0	NA	NA	NA	0	0	0	0	0	0
chr13_26898909_26928017	0	0	NA	NA	NA	0	0	0	0	0	0
chr13_26911704_26928017	0	0	NA	NA	NA	0	0	0	0	0	0
chr13_26911704_26959479	0	0	NA	NA	NA	0	0	0	0	0	0
chr13_26923209_26928017	0	0	NA	NA	NA	0	0	0	0	0	0
chr13_27183466_27187195	0	0	NA	NA	NA	0	0	0	0	0	0
chr13_27649328_27664295	0	0	NA	NA	NA	0	0	0	0	0	0
chr13_28155434_28155940	0	0	NA	NA	NA	0	0	0	0	0	0
chr13_28748409_28752072	0	0	NA	NA	NA	0	0	0	0	0	0
chr13_28748409_28771483	0	0	NA	NA	NA	0	0	0	0	0	0
chr13_28748409_28794515	0	0	NA	NA	NA	0	0	0	0	0	0
chr13_28771322_28794515	0	0.432813	0.157357	0.843372	0.995233	0	0	0	1.29844	0	0
chr13_28830429_28835595	0.192991	0.797988	0.450475	0.62738	0.995233	0.578972	0	0	0	0.820731	1.57323
chr13_28830429_28845003	0.192991	0	-0.213771	0.788477	0.995233	0.578972	0	0	0	0	0
chr13_28840852_28845003	0.192991	0	-0.213771	0.788477	0.995233	0.578972	0	0	0	0	0
chr13_28840855_28845003	0	0	NA	NA	NA	0	0	0	0	0	0
chr13_30104675_30110339	0	0	NA	NA	NA	0	0	0	0	0	0
chr13_30104675_30127997	0	0	NA	NA	NA	0	0	0	0	0	0
chr13_30341236_30351400	0	0	NA	NA	NA	0	0	0	0	0	0
chr13_30826068_30829752	0	0	NA	NA	NA	0	0	0	0	0	0
chr13_30854200_30857928	0	0	NA	NA	NA	0	0	0	0	0	0
chr13_31204972_31205611	0	1.21322	1.07885	0.263942	0.995233	0	0	0	2.42731	0	1.21235
chr13_31789188_31803431	0	0	NA	NA	NA	0	0	0	0	0	0
chr13_33054727_33101669	0	0	NA	NA	NA	0	0	0	0	0	0
chr13_33091994_33101669	0	0	NA	NA	NA	0	0	0	0	0	0
chr13_33268360_33284243	0.524319	0.900173	0.148189	0.879597	0.995233	1.57296	0	0	1.97058	0	0.72994
chr13_33306238_33309467	0	0	NA	NA	NA	0	0	0	0	0	0
chr13_33306238_33320238	0	0	NA	NA	NA	0	0	0	0	0	0
chr13_33315218_33320238	0	0	NA	NA	NA	0	0	0	0	0	0
chr13_35615070_35619538	0	0	NA	NA	NA	0	0	0	0	0	0
chr13_36822743_36828280	0	0	NA	NA	NA	0	0	0	0	0	0
chr13_36857606_36869994	0	0.243313	0.157357	0.843372	0.995233	0	0	0	0	0	0.72994
chr13_36939637_36943737	0	0	NA	NA	NA	0	0	0	0	0	0
chr13_37614542_37625720	0.437042	0.836928	0.139449	0.884217	0.995233	1.31113	0	0	1.29844	0	1.21235
chr13_40239233_40254182	0	0	NA	NA	NA	0	0	0	0	0	0
chr13_40268771_40301685	0	0	NA	NA	NA	0	0	0	0	0	0
chr13_41207284_41219623	0	0	NA	NA	NA	0	0	0	0	0	0
chr13_41482295_41486859	0	0	NA	NA	NA	0	0	0	0	0	0
chr13_41515057_41515506	0	0	NA	NA	NA	0	0	0	0	0	0
chr13_41826781_41828756	0	0	NA	NA	NA	0	0	0	0	0	0
chr13_41826781_41835051	0	0	NA	NA	NA	0	0	0	0	0	0
chr13_42352121_42393522	0	0	NA	NA	NA	0	0	0	0	0	0
chr13_42385361_42393522	0	0	NA	NA	NA	0	0	0	0	0	0
chr13_42385361_42407667	0	0	NA	NA	NA	0	0	0	0	0	0
chr13_42439872_42442613	0	0	NA	NA	NA	0	0	0	0	0	0
chr13_42439872_42461497	0	0	NA	NA	NA	0	0	0	0	0	0
chr13_42693231_42703768	0	0	NA	NA	NA	0	0	0	0	0	0
chr13_42742576_42761284	0	0	NA	NA	NA	0	0	0	0	0	0
chr13_43639822_43659974	5.23262	4.67162	-0.0316012	0.966061	0.995233	4.5974	5.44818	5.65227	5.85613	2.48486	5.67388
chr13_43986052_43987124	0	0	NA	NA	NA	0	0	0	0	0	0
chr13_45725822_45781640	0.782591	3.012	1.86649	0.0436857	0.995233	1.57296	0.774815	0	2.42731	3.45443	3.15427
chr13_46090278_46093229	0.330335	0.677692	0.161348	0.861092	0.995233	0.991005	0	0	0	0.820731	1.21235
chr13_46090278_46099186	0.330335	2.08503	1.53465	0.123726	0.995233	0.991005	0	0	3.05279	1.34062	1.86167
chr13_46090278_46104053	0	0	NA	NA	NA	0	0	0	0	0	0
chr13_46090278_46104915	0	0	NA	NA	NA	0	0	0	0	0	0
chr13_47224336_47243291	0	0	NA	NA	NA	0	0	0	0	0	0
chr13_47285926_47308133	0.192991	0.836928	0.412538	0.655988	0.995233	0.578972	0	0	1.29844	0	1.21235
chr13_47297356_47303119	0	0	NA	NA	NA	0	0	0	0	0	0
chr13_47297356_47308133	0.330335	0.879687	0.305027	0.748082	0.995233	0.991005	0	0	1.29844	1.34062	0
chr13_48523075_48528692	0	0	NA	NA	NA	0	0	0	0	0	0
chr13_48562676_48571158	0.330335	1.40704	0.8298	0.406946	0.995233	0.991005	0	0	1.29844	0.820731	2.10194
chr13_49761258_49762769	0	0	NA	NA	NA	0	0	0	0	0	0
chr13_49771013_49772710	0	0	NA	NA	NA	0	0	0	0	0	0
chr13_50025689_50026045	0	0	NA	NA	NA	0	0	0	0	0	0
chr13_50025689_50035298	0	0	NA	NA	NA	0	0	0	0	0	0
chr13_50025689_50042096	0.330335	1.57462	0.976443	0.330813	0.995233	0.991005	0	0	1.97058	2.02333	0.72994
chr13_50279757_50280508	0	0	NA	NA	NA	0	0	0	0	0	0
chr13_51501543_51509135	0.258272	2.47799	2.18165	0.026425	0.995233	0	0.774815	0	1.29844	2.98125	3.15427
chr13_51501543_51523641	2.14943	3.53895	0.150095	0.861139	0.995233	1.79449	4.65381	0	3.28655	3.88688	3.44341
chr13_51893807_51894187	0	0	NA	NA	NA	0	0	0	0	0	0
chr13_52971367_52972329	0	0	NA	NA	NA	0	0	0	0	0	0
chr13_52992127_53000201	0	0	NA	NA	NA	0	0	0	0	0	0
chr13_52992127_53001354	0	0	NA	NA	NA	0	0	0	0	0	0
chr13_60407241_60413582	0	0	NA	NA	NA	0	0	0	0	0	0
chr13_60485869_60490383	0	0	NA	NA	NA	0	0	0	0	0	0
chr13_60485869_60499004	0	0	NA	NA	NA	0	0	0	0	0	0
chr13_60667762_60686320	0	0	NA	NA	NA	0	0	0	0	0	0
chr13_60667762_60707123	0	0	NA	NA	NA	0	0	0	0	0	0
chr13_61013822_61034674	0.192991	0	-0.213771	0.788477	0.995233	0.578972	0	0	0	0	0
chr13_61013822_61041513	0	0	NA	NA	NA	0	0	0	0	0	0
chr13_61013822_61060082	0	0	NA	NA	NA	0	0	0	0	0	0
chr13_61018817_61041513	0	0	NA	NA	NA	0	0	0	0	0	0
chr13_61034514_61041513	0	0	NA	NA	NA	0	0	0	0	0	0
chr13_64564229_64577598	0.598163	0.243313	-0.469693	0.597897	0.995233	1.79449	0	0	0	0	0.72994
chr13_64564229_64608670	0	0	NA	NA	NA	0	0	0	0	0	0
chr13_64793357_64819610	0	0	NA	NA	NA	0	0	0	0	0	0
chr13_73467922_73505405	0.920434	2.1057	0.744356	0.44546	0.995233	1.98649	0.774815	0	1.97058	2.48486	1.86167
chr13_74506372_74518207	0	0	NA	NA	NA	0	0	0	0	0	0
chr13_75900333_75923438	0	0	NA	NA	NA	0	0	0	0	0	0
chr13_75930283_75936743	0	0	NA	NA	NA	0	0	0	0	0	0
chr13_76134889_76143643	0.695314	3.14047	2.11295	0.0218262	0.995233	1.31113	0.774815	0	3.66414	2.83398	2.92328
chr13_76134889_76169126	0	0	NA	NA	NA	0	0	0	0	0	0
chr13_76195899_76301234	0	0	NA	NA	NA	0	0	0	0	0	0
chr13_76287318_76335174	0.192991	1.18127	0.81888	0.403099	0.995233	0.578972	0	0	1.97058	0	1.57323
chr13_77700453_77703365	0	0	NA	NA	NA	0	0	0	0	0	0
chr13_79951514_79953042	0.437042	0	-0.440742	0.581888	0.995233	1.31113	0	0	0	0	0
chr13_80080303_80095110	0	0	NA	NA	NA	0	0	0	0	0	0
chr13_80094945_80113910	0	0	NA	NA	NA	0	0	0	0	0	0
chr13_80094945_80122529	0.76917	2.03801	0.694265	0.483445	0.995233	2.30751	0	0	1.29844	2.02333	2.79226
chr13_83637349_83676411	0.192991	0	-0.213771	0.788477	0.995233	0.578972	0	0	0	0	0
chr13_88099351_88163725	0	0	NA	NA	NA	0	0	0	0	0	0
chr13_95686859_95715113	0	0	NA	NA	NA	0	0	0	0	0	0
chr13_95813443_95818621	0	0	NA	NA	NA	0	0	0	0	0	0
chr13_95813443_95822882	0.330335	0	-0.340494	0.669749	0.995233	0.991005	0	0	0	0	0
chr13_95858786_95863035	0	0	NA	NA	NA	0	0	0	0	0	0
chr13_96361481_96377506	0	0	NA	NA	NA	0	0	0	0	0	0
chr13_96375496_96377506	0	0	NA	NA	NA	0	0	0	0	0	0
chr13_96409898_96416207	0.588607	1.53122	0.703886	0.483353	0.995233	0.991005	0.774815	0	1.29844	1.72199	1.57323
chr13_96485181_96489456	0	0	NA	NA	NA	0	0	0	0	0	0
chr13_96622366_96648389	0	0	NA	NA	NA	0	0	0	0	0	0
chr13_96622366_96651561	0	0	NA	NA	NA	0	0	0	0	0	0
chr13_96636058_96648389	0	0	NA	NA	NA	0	0	0	0	0	0
chr13_96636058_96651561	0	0	NA	NA	NA	0	0	0	0	0	0
chr13_96637493_96648389	0	0	NA	NA	NA	0	0	0	0	0	0
chr13_96638587_96648389	0	0	NA	NA	NA	0	0	0	0	0	0
chr13_96665561_96684225	0	0	NA	NA	NA	0	0	0	0	0	0
chr13_96837104_96840751	0	0	NA	NA	NA	0	0	0	0	0	0
chr13_98865474_98865667	0	0	NA	NA	NA	0	0	0	0	0	0
chr13_99061592_99064288	0	0	NA	NA	NA	0	0	0	0	0	0
chr13_99061592_99076904	0	1.1903	1.03037	0.282237	0.995233	0	0	0	1.29844	2.27247	0
chr13_99109422_99118815	1.906	3.816	0.782749	0.353935	0.995233	4.07048	1.6475	0	3.48767	3.7291	4.23123
chr13_99134519_99171727	1.16903	2.64394	0.381522	0.689218	0.995233	3.50709	0	0	3.28655	1.72199	2.92328
chr13_99157169_99171727	0	0	NA	NA	NA	0	0	0	0	0	0
chr13_99171497_99171727	0	0	NA	NA	NA	0	0	0	0	0	0
chr13_99498178_99508285	0	0	NA	NA	NA	0	0	0	0	0	0
chr13_99500846_99508285	0	0.850989	0.603702	0.493314	0.995233	0	0	0	0	1.34062	1.21235
chr13_99549742_99556960	0	0	NA	NA	NA	0	0	0	0	0	0
chr13_99573208_99575625	0	0	NA	NA	NA	0	0	0	0	0	0
chr13_99573208_99582511	0	0	NA	NA	NA	0	0	0	0	0	0
chr13_99890681_99896878	0	0	NA	NA	NA	0	0	0	0	0	0
chr13_99890681_99970323	0	0	NA	NA	NA	0	0	0	0	0	0
chr14_100551024_100563995	0.598163	1.78039	0.702236	0.483514	0.995233	1.79449	0	0	2.42731	1.34062	1.57323
chr14_100826891_100828258	0	0	NA	NA	NA	0	0	0	0	0	0
chr14_100934358_100950461	1.41016	1.50785	0.146112	0.882179	0.995233	0.991005	1.27616	1.96331	1.97058	1.34062	1.21235
chr14_102468874_102469302	0.330335	0.404115	-0.00184386	0.998252	0.998535	0.991005	0	0	0	0	1.21235
chr14_102469129_102471020	0.192991	0.404115	0.123077	0.878155	0.995233	0.578972	0	0	0	0	1.21235
chr14_102486230_102489217	0.718636	2.3689	1.17559	0.228568	0.995233	2.15591	0	0	3.66414	1.34062	2.10194
chr14_102506573_102507010	0	0	NA	NA	NA	0	0	0	0	0	0
chr14_102659800_102661457	0	0	NA	NA	NA	0	0	0	0	0	0
chr14_102661275_102664184	0.718636	0.930437	-0.102239	0.917967	0.995233	2.15591	0	0	1.97058	0.820731	0
chr14_102810158_102810726	0	0	NA	NA	NA	0	0	0	0	0	0
chr14_103180760_103187714	0.192991	0	-0.213771	0.788477	0.995233	0.578972	0	0	0	0	0
chr14_103296671_103342862	0	0	NA	NA	NA	0	0	0	0	0	0
chr14_103336522_103342862	0.618379	0.70639	-0.0868684	0.928708	0.995233	0.578972	1.27616	0	1.29844	0.820731	0
chr14_103449893_103452917	0	0	NA	NA	NA	0	0	0	0	0	0
chr14_103465902_103478525	0	0	NA	NA	NA	0	0	0	0	0	0
chr14_103470265_103478525	0	0	NA	NA	NA	0	0	0	0	0	0
chr14_103474809_103478525	0	0	NA	NA	NA	0	0	0	0	0	0
chr14_103865288_103871604	0	0	NA	NA	NA	0	0	0	0	0	0
chr14_103865288_103894777	0	0.273577	0.157357	0.843372	0.995233	0	0	0	0	0.820731	0
chr14_103871413_103894777	0.524319	1.25598	0.505756	0.612501	0.995233	1.57296	0	0	2.42731	1.34062	0
chr14_103894724_103923549	0.330335	2.2995	1.70934	0.0842253	0.995233	0.991005	0	0	3.05279	2.27247	1.57323
chr14_103894724_103928798	0	0	NA	NA	NA	0	0	0	0	0	0
chr14_103915256_103923549	0.782591	1.96539	0.977322	0.322133	0.995233	1.57296	0.774815	0	2.42731	0.820731	2.64813
chr14_103918255_103928798	0.524319	0	-0.513378	0.52235	0.995233	1.57296	0	0	0	0	0
chr14_104037960_104053701	0	0	NA	NA	NA	0	0	0	0	0	0
chr14_104120901_104121162	0	0	NA	NA	NA	0	0	0	0	0	0
chr14_104223987_104263855	0	0	NA	NA	NA	0	0	0	0	0	0
chr14_104245082_104263855	0	0	NA	NA	NA	0	0	0	0	0	0
chr14_104433046_104436958	0	0	NA	NA	NA	0	0	0	0	0	0
chr14_104624092_104633385	0	0	NA	NA	NA	0	0	0	0	0	0
chr14_105692406_105693097	0	0	NA	NA	NA	0	0	0	0	0	0
chr14_105718844_105739231	0	0	NA	NA	NA	0	0	0	0	0	0
chr14_105718844_105752713	0	0	NA	NA	NA	0	0	0	0	0	0
chr14_105814830_105821514	1.08755	1.09841	-0.0838271	0.933455	0.995233	1.98649	1.27616	0	0	1.72199	1.57323
chr14_20793698_20797532	0	0	NA	NA	NA	0	0	0	0	0	0
chr14_20863609_20864889	0	0	NA	NA	NA	0	0	0	0	0	0
chr14_21464368_21464870	0.755723	0	-0.653902	0.442923	0.995233	0.991005	1.27616	0	0	0	0
chr14_21698478_21702388	2.81584	6.58658	2.23189	0.0025596	0.995233	5.091	3.35651	0	6.39573	6.89494	6.46907
chr14_21825356_21829372	0	0	NA	NA	NA	0	0	0	0	0	0
chr14_21971316_21972024	0	0	NA	NA	NA	0	0	0	0	0	0
chr14_23375404_23380612	0	0	NA	NA	NA	0	0	0	0	0	0
chr14_23395342_23396023	0	0	NA	NA	NA	0	0	0	0	0	0
chr14_23395342_23396869	0	0	NA	NA	NA	0	0	0	0	0	0
chr14_23419523_23421892	0	0	NA	NA	NA	0	0	0	0	0	0
chr14_23502577_23502883	0	0	NA	NA	NA	0	0	0	0	0	0
chr14_24735636_24737825	0	0	NA	NA	NA	0	0	0	0	0	0
chr14_25443871_25446449	0	0	NA	NA	NA	0	0	0	0	0	0
chr14_26595363_26596938	0	0	NA	NA	NA	0	0	0	0	0	0
chr14_31050282_31062845	0	0	NA	NA	NA	0	0	0	0	0	0
chr14_31067689_31071337	0	0	NA	NA	NA	0	0	0	0	0	0
chr14_31097415_31107453	0.662162	2.04527	1.16145	0.243449	0.995233	1.98649	0	0	3.48767	0	2.64813
chr14_31097415_31122794	0	0	NA	NA	NA	0	0	0	0	0	0
chr14_31103153_31107453	0	0	NA	NA	NA	0	0	0	0	0	0
chr14_31103153_31112611	0	0	NA	NA	NA	0	0	0	0	0	0
chr14_31103153_31122794	0.192991	0	-0.213771	0.788477	0.995233	0.578972	0	0	0	0	0
chr14_31112522_31122794	1.32045	2.57475	0.649953	0.48289	0.995233	2.68518	1.27616	0	3.05279	2.02333	2.64813
chr14_31139462_31144271	0	0	NA	NA	NA	0	0	0	0	0	0
chr14_31139462_31169464	0	0	NA	NA	NA	0	0	0	0	0	0
chr14_31185130_31204064	0	0	NA	NA	NA	0	0	0	0	0	0
chr14_31535332_31542179	0	0	NA	NA	NA	0	0	0	0	0	0
chr14_31581622_31583546	0.662162	1.09841	0.15181	0.879114	0.995233	1.98649	0	0	0	1.72199	1.57323
chr14_31582310_31583546	0.76917	1.78039	0.396121	0.691671	0.995233	2.30751	0	0	2.42731	1.34062	1.57323
chr14_31605737_31626092	0	0	NA	NA	NA	0	0	0	0	0	0
chr14_31637504_31638674	0	0	NA	NA	NA	0	0	0	0	0	0
chr14_31765115_31771725	0	0	NA	NA	NA	0	0	0	0	0	0
chr14_31775938_31778388	0	0	NA	NA	NA	0	0	0	0	0	0
chr14_31792771_31795548	0.330335	0.70639	0.114688	0.900995	0.995233	0.991005	0	0	1.29844	0.820731	0
chr14_31813102_31817113	0	0	NA	NA	NA	0	0	0	0	0	0
chr14_31818995_31833504	0	0	NA	NA	NA	0	0	0	0	0	0
chr14_31841016_31844174	0	0	NA	NA	NA	0	0	0	0	0	0
chr14_31849673_31856581	0.524319	0	-0.513378	0.52235	0.995233	1.57296	0	0	0	0	0
chr14_32241022_32257079	0	0	NA	NA	NA	0	0	0	0	0	0
chr14_32586346_32621734	0.192991	1.21322	0.924116	0.349237	0.995233	0.578972	0	0	2.42731	0	1.21235
chr14_32902666_32903023	0	0	NA	NA	NA	0	0	0	0	0	0
chr14_34394824_34400421	0	0	NA	NA	NA	0	0	0	0	0	0
chr14_35020920_35024118	0	0	NA	NA	NA	0	0	0	0	0	0
chr14_35036892_35037219	0	0	NA	NA	NA	0	0	0	0	0	0
chr14_35044962_35078948	0	0	NA	NA	NA	0	0	0	0	0	0
chr14_35276657_35331528	0	0	NA	NA	NA	0	0	0	0	0	0
chr14_35295219_35331528	0	0	NA	NA	NA	0	0	0	0	0	0
chr14_35331250_35331528	0	0	NA	NA	NA	0	0	0	0	0	0
chr14_35438376_35441270	0.549168	1.06097	0.2637	0.789605	0.995233	0	1.6475	0	1.97058	0	1.21235
chr14_35487898_35488280	0.330335	0.243313	-0.145737	0.855711	0.995233	0.991005	0	0	0	0	0.72994
chr14_37709638_37717112	0	0	NA	NA	NA	0	0	0	0	0	0
chr14_37838722_37892154	0	0	NA	NA	NA	0	0	0	0	0	0
chr14_37969113_37969343	0	0	NA	NA	NA	0	0	0	0	0	0
chr14_39562391_39565343	0	0	NA	NA	NA	0	0	0	0	0	0
chr14_39565102_39565343	0	0	NA	NA	NA	0	0	0	0	0	0
chr14_39620950_39628754	0	0	NA	NA	NA	0	0	0	0	0	0
chr14_39623415_39627606	0.618379	1.50785	0.624346	0.534099	0.995233	0.578972	1.27616	0	1.97058	1.34062	1.21235
chr14_39623415_39628754	0	0	NA	NA	NA	0	0	0	0	0	0
chr14_39627489_39628754	0	0	NA	NA	NA	0	0	0	0	0	0
chr14_39746138_39748741	0.524319	0.243313	-0.364457	0.672959	0.995233	1.57296	0	0	0	0	0.72994
chr14_39746138_39764233	0.258272	0.676127	0.173674	0.84776	0.995233	0	0.774815	0	1.29844	0	0.72994
chr14_39782544_39796226	2.64657	3.05426	0.506341	0.547095	0.995233	3.23179	1.94256	2.76535	3.48767	1.72199	3.95313
chr14_39815108_39818181	0	0	NA	NA	NA	0	0	0	0	0	0
chr14_40124049_40125012	0	0	NA	NA	NA	0	0	0	0	0	0
chr14_45475211_45495075	0	0	NA	NA	NA	0	0	0	0	0	0
chr14_45481178_45497532	0	0.971285	0.741604	0.416874	0.995233	0	0	0	0	1.34062	1.57323
chr14_45618040_45628483	0	0	NA	NA	NA	0	0	0	0	0	0
chr14_45623900_45628483	0	0	NA	NA	NA	0	0	0	0	0	0
chr14_45705017_45706924	0	0	NA	NA	NA	0	0	0	0	0	0
chr14_45715946_45716580	0.330335	0	-0.340494	0.669749	0.995233	0.991005	0	0	0	0	0
chr14_50074118_50074839	0.192991	0.404115	0.123077	0.878155	0.995233	0.578972	0	0	0	0	1.21235
chr14_50120708_50122529	0	0	NA	NA	NA	0	0	0	0	0	0
chr14_50130033_50133131	0	0	NA	NA	NA	0	0	0	0	0	0
chr14_50130033_50141145	0	0	NA	NA	NA	0	0	0	0	0	0
chr14_50131344_50141145	0.330335	0.676127	0.088375	0.923303	0.995233	0.991005	0	0	1.29844	0	0.72994
chr14_50136242_50141145	0	0	NA	NA	NA	0	0	0	0	0	0
chr14_50615003_50616948	0	0	NA	NA	NA	0	0	0	0	0	0
chr14_50616726_50616948	0	0	NA	NA	NA	0	0	0	0	0	0
[truncated: 5,089 more rows]

## Sheet: B_Overlap_with_cell_lines_data
	log2FoldChange			pvalue			padj			DE in Jiang et al., 2018 (Y=yes, N=no)			DE analysis CRC tissue vs adjacent
ID	NCM460_vs_SW480	NCM460_vs_SW640	SW640_vs_SW480	NCM460_vs_SW480	NCM460_vs_SW640	SW640_vs_SW480	NCM460_vs_SW480	NCM460_vs_SW640	SW640_vs_SW480	NCM460_vs_SW480	NCM460_vs_SW640	SW640_vs_SW480	NCM	CRC	log2FoldChange	pvalue	padj
chr13_76134889_76143643	0.977602	1.78879	0.811186	7.45686e-08	5.56304e-23	2.92949e-06	1.60538e-06	7.43453e-21	6.93951e-05	N	Y	N	0.695314	3.14047	2.11295	0.0218262	0.995233
chr3_4403723_4418073	-2.86005	-8.34502	-5.48497	9.47877e-07	1.15742e-10	2.89905e-05	1.64959e-05	4.31476e-09	0.000497087	Y	Y	N	0.718636	3.04011	1.8793	0.0462144	0.995233
chr1_23397718_23398690	-1.54145	1.12624	2.66769	0.000549087	0.00697916	1.6871e-09	0.00403212	0.0311259	8.03781e-08	Y	N	Y	0.662162	2.94764	1.66691	0.0790461	0.995233
chr11_66407171_66407594	-1.86824	-1.47112	0.397112	5.81218e-47	3.0194e-29	0.00317456	2.57298e-44	6.89885e-27	0.0233047	Y	Y	N	1.59442	3.97492	1.32305	0.115581	0.995233
chr3_171830242_171851336	-0.957323	-3.61466	-2.65734	0.00028586	1.57341e-22	1.33478e-12	0.00239926	2.02627e-20	1.29028e-10	N	Y	Y	0.258272	1.72255	1.35321	0.177967	0.995233
chr5_151169884_151170623	1.7146	0.963638	-0.750965	8.42456e-10	0.000971959	0.0063688	2.70005e-08	0.00715027	0.0385081	Y	N	N	0.76917	2.72516	1.27338	0.183754	0.995233
chr3_31617888_31621588	-0.397145	-0.947215	-0.550069	0.000591703	6.6465e-15	7.16462e-06	0.0042722	4.27974e-13	0.000153167	N	N	N	0.662162	2.13384	1.08757	0.270833	0.995233
chr3_196831774_196846401	1.25946	-0.552859	-1.81231	2.45297e-34	4.09033e-07	6.6201e-64	7.55409e-32	7.46696e-06	1.47187e-60	Y	N	Y	0.524319	1.59159	0.918244	0.360756	0.995233
chr22_46125305_46136418	-1.89407	-1.08568	0.80839	2.13037e-11	0.000120132	0.00505132	8.8761e-10	0.00123676	0.0323458	Y	Y	N	1.74942	3.20188	0.758663	0.382811	0.995233
chr17_80721841_80739597	1.05339	-0.908124	-1.96151	0.00147634	0.0150279	7.87705e-08	0.00864206	0.0484737	2.84e-06	Y	N	Y	0.192991	1.13346	0.813091	0.405023	0.995233
chr12_8866407_8866637	-1.62478	-6.23574	-4.61096	0.00310185	5.30774e-08	6.42481e-05	0.0133911	1.14968e-06	0.000996593	Y	Y	Y	0.598163	0	-0.577458	0.476538	0.995233
chr6_10703638_10705077	1.01737	2.82073	1.80336	0.000415012	8.48253e-24	9.34501e-12	0.00323889	1.2517e-21	7.33308e-10	N	Y	Y	1.14733	2.07302	0.6492	0.500354	0.995233
chr2_206305094_206305396	-2.65526	-9.27242	-6.61716	2.86134e-12	4.38334e-14	8.67248e-08	1.35113e-10	2.60901e-12	3.09334e-06	Y	Y	Y	0.192991	0.809102	0.613646	0.514921	0.995233
chr7_73770740_73771807	4.08052	2.70347	-1.37705	1.5893e-21	6.62308e-10	0.00038887	2.01018e-19	2.09425e-08	0.00450307	Y	Y	Y	0.76917	0.446873	-0.520551	0.587485	0.995233
chr2_36668401_36669878	-1.01547	-9.66012	-8.64464	2.09469e-06	6.22409e-16	4.91263e-13	3.34913e-05	4.54487e-14	5.20115e-11	Y	Y	Y	0.598163	0.243313	-0.469693	0.597897	0.995233
chr2_227771509_227779067	6.95367	9.24377	2.2901	1.19595e-07	1.45317e-12	0.000102974	2.46965e-06	7.14777e-11	0.00150527	Y	Y	Y	0.588607	1.06743	0.436016	0.662389	0.995233
chr1_28601336_28605752	-8.65818	-4.06051	4.59767	3.076e-08	0.000395408	0.00507132	7.26243e-07	0.0034322	0.0324312	Y	N	N	0.662162	0.404115	-0.407069	0.66277	0.995233
chr2_171538905_171539569	9.89111	11.533	1.64188	1.78781e-16	7.34003e-22	6.04636e-12	1.42281e-14	8.55669e-20	5.04115e-10	Y	Y	Y	1.37305	0.900173	-0.39777	0.69189	0.995233
chr11_14793483_14810788	-1.20984	3.02516	4.235	0.00229414	1.29215e-21	1.25765e-30	0.0117047	1.47618e-19	6.45273e-28	N	Y	Y	0	0.51689	0.315698	0.692707	0.995233
chr3_154801947_154836600	-5.33372	3.45464	8.78836	4.7219e-05	4.00188e-09	6.53909e-12	0.000533416	1.0902e-07	5.38466e-10	N	Y	Y	0	0.404115	0.302324	0.704956	0.995233
chr5_60768508_60768864	-1.56447	-2.29585	-0.731382	1.3567e-10	7.73463e-18	0.00786934	4.92487e-09	6.93473e-16	0.0449003	Y	Y	N	0	0.404115	0.302324	0.704956	0.995233
chr5_21491430_21497305	-3.19937	-2.16882	1.03055	1.3721e-103	4.2357e-52	4.48119e-10	4.85929e-100	2.72741e-49	2.35351e-08	Y	Y	N	1.14402	1.62521	0.375165	0.705123	0.995233
chr13_47297356_47308133	4.11029	4.7805	0.67021	3.81261e-29	8.7292e-39	0.00355914	8.18324e-27	3.86431e-36	0.0252826	Y	Y	N	0.330335	0.879687	0.305027	0.748082	0.995233
chr6_20781376_20846409	7.07174	9.2957	2.22396	1.40425e-08	6.35798e-14	1.16689e-07	3.55226e-07	3.66127e-12	4.03273e-06	Y	Y	Y	0.879503	1.45485	0.321518	0.748151	0.995233
chr1_92798948_92846430	-1.59192	-0.725723	0.866201	5.97429e-19	4.50959e-05	2.93395e-06	6.51014e-17	0.000528831	6.93951e-05	Y	N	N	0.437042	0.243313	-0.252619	0.760138	0.995233
chr12_47497896_47501947	-7.60816	1.3642	8.97236	4.68823e-09	0.0145335	4.4198e-12	1.33898e-07	0.0472066	3.78861e-10	Y	N	Y	0.258272	0	-0.224361	0.778305	0.995233
chr4_6925100_6925838	0.795889	2.294	1.49811	0.0018822	7.73358e-20	7.57443e-10	0.010277	8.17567e-18	3.8566e-08	N	Y	Y	0.192991	0	-0.213771	0.788477	0.995233
chr4_88116476_88116842	-2.48603	-0.914129	1.5719	1.56096e-25	7.2514e-05	1.21792e-10	2.51278e-23	0.000805042	7.06395e-09	Y	N	Y	0.192991	0	-0.213771	0.788477	0.995233
chr7_30395344_30405911	-1.22136	-6.29073	-5.06937	0.000317295	1.72851e-12	1.5158e-08	0.00260719	8.38563e-11	6.16487e-07	Y	Y	Y	0.192991	0	-0.213771	0.788477	0.995233
chr6_157357969_157406039	0.861068	1.67452	0.813454	0.00467855	3.54209e-08	0.00590214	0.0173317	7.84019e-07	0.0362498	N	Y	N	0.437042	0.900173	0.25992	0.788987	0.995233
chr4_151023630_151023964	-4.51962	-9.99991	-5.48028	0.00184783	7.07526e-08	0.00336176	0.0101539	1.49594e-06	0.0243199	Y	Y	N	0.437042	0.432813	-0.224094	0.798615	0.995233
chr3_57875768_57882659	1.40385	0.60907	-0.794778	1.28329e-10	0.0071828	0.000286943	4.80927e-09	0.0316078	0.00346096	Y	N	N	0.192991	0.676127	0.222667	0.802837	0.995233
chr17_79937060_79943483	-0.780428	1.72437	2.5048	0.00426826	1.55473e-11	4.55993e-21	0.0161152	6.79761e-10	9.5046e-19	N	Y	Y	0.862431	1.33455	0.242479	0.809092	0.995233
chr9_96238538_96261168	-0.830064	-1.97117	-1.1411	0.00740604	2.49397e-08	0.00154245	0.0252076	5.73531e-07	0.0135728	N	Y	N	0.856647	1.69972	0.229957	0.817894	0.995233
chr2_10281981_10282502	2.2261	4.0813	1.8552	7.80625e-05	1.97432e-13	0.000178959	0.000822793	1.0757e-11	0.00232229	N	Y	Y	0.451262	0.273577	-0.186733	0.826472	0.995233
chr1_59805630_59844509	-5.91891	2.05042	7.96932	2.264e-05	0.00752287	8.32161e-09	0.000280839	0.0322545	3.62421e-07	Y	N	Y	0	0.243313	0.157357	0.843372	0.995233
chr11_70505933_70507783	5.62676	6.90403	1.27727	9.18125e-21	1.36526e-30	1.21788e-06	1.12122e-18	3.33453e-28	3.27432e-05	Y	Y	Y	0	0.432813	0.157357	0.843372	0.995233
chr15_89656956_89659752	1.79838	2.29245	0.494073	4.13683e-31	4.00955e-49	0.00075132	9.76705e-29	2.36664e-46	0.00768605	Y	Y	N	0	0.243313	0.157357	0.843372	0.995233
chr18_8718422_8720494	-0.873194	1.07291	1.9461	0.0047217	0.000252421	1.92326e-10	0.0174187	0.00233102	1.078e-08	N	N	Y	0	0.243313	0.157357	0.843372	0.995233
chr5_167915607_167921655	-0.882463	-2.82942	-1.94696	2.5803e-05	3.24661e-23	2.08165e-11	0.000315108	4.59915e-21	1.49055e-09	N	Y	Y	0	0.243313	0.157357	0.843372	0.995233
chr5_95091100_95099324	-0.846651	-1.75563	-0.908977	4.76712e-10	4.18347e-32	1.94286e-09	1.56322e-08	1.09746e-29	9.12597e-08	N	Y	N	0	0.243313	0.157357	0.843372	0.995233
chr6_87925621_87928449	0.852451	-0.957731	-1.81018	3.39409e-07	1.58638e-07	9.07966e-24	6.47987e-06	3.14779e-06	2.6331e-21	N	Y	Y	0	0.432813	0.157357	0.843372	0.995233
chrX_53672263_53681075	-0.733889	-1.08103	-0.347146	3.64927e-11	9.09173e-21	0.0030929	1.46033e-09	9.90719e-19	0.0228964	N	Y	N	0	0.432813	0.157357	0.843372	0.995233
chr1_247322308_247323115	-1.87291	-0.764797	1.10811	1.60046e-15	0.000801497	8.19401e-06	1.12238e-13	0.0061188	0.000172721	Y	N	Y	0.192991	0.51689	0.160116	0.850099	0.995233
chr13_51501543_51523641	1.03162	2.11362	1.082	0.00662146	2.0578e-08	0.00284512	0.0229115	4.84233e-07	0.021373	N	Y	N	2.14943	3.53895	0.150095	0.861139	0.995233
chr13_114174931_114193822	1.41367	2.62918	1.21551	0.00177192	4.46038e-09	0.00417156	0.00985902	1.17192e-07	0.0285377	N	Y	N	1.18891	1.93307	0.154712	0.873517	0.995233
chr8_141856359_141900868	-1.98896	-1.31008	0.678874	2.97845e-29	1.55724e-13	0.000279943	6.59261e-27	8.61714e-12	0.00338878	Y	Y	N	0.598163	0.949704	-0.0601889	0.951512	0.995233
chr8_18622959_18662408	-0.612147	-1.24791	-0.635758	0.00212635	4.5996e-09	0.00321749	0.0111315	1.20218e-07	0.0235057	N	Y	N	0.451262	0.676127	0.0478588	0.959801	0.995233
chr5_70888753_70900295	0.680482	1.30068	0.620201	0.00366	3.05361e-08	0.006613	0.0145639	6.93228e-07	0.0395949	N	Y	N	0.330335	0.446873	0.0342363	0.9681	0.995233
chr17_26490569_26499644	1.44997	-2.96468	-4.41466	0.000899538	2.16773e-06	8.70627e-13	0.00599505	3.4349e-05	8.63254e-11	Y	Y	Y	0.192991	0.432813	-0.0123831	0.987718	0.995233
chr12_28458582_28460682	-2.35231	-1.53962	0.812686	4.9427e-61	2.28698e-27	5.81694e-08	3.50091e-58	4.90869e-25	2.14359e-06	Y	Y	N	0.695314	0.620557	0.0117835	0.990319	0.996436
chr1_1192372_1192690	1.22228	2.3901	1.16782	0.00217902	1.53485e-09	0.00208508	0.0112964	4.54868e-08	0.0169397	Y	Y	N	0	0	NA	NA	NA
chr1_179100446_179102509	-0.830469	-1.87036	-1.03989	0.000375331	3.56581e-12	0.000155553	0.00300053	1.67263e-10	0.00206682	N	Y	N	0	0	NA	NA	NA
chr1_19244856_19246267	9.90965	8.31264	-1.597	1.87252e-15	3.23112e-11	0.00021017	1.3003e-13	1.32289e-09	0.00267526	Y	Y	Y	0	0	NA	NA	NA
chr1_214564331_214571344	1.66626	-6.3454	-8.01166	0.000214371	4.5104e-07	1.44509e-10	0.00189562	8.19158e-06	8.23822e-09	Y	Y	Y	0	0	NA	NA	NA
chr1_225211317_225211567	-6.04605	1.94459	7.99064	1.95816e-05	0.0152292	1.26749e-08	0.000246353	0.0490535	5.19442e-07	Y	N	Y	0	0	NA	NA	NA
chr1_247302018_247323115	-2.84445	-1.12984	1.71461	1.75681e-25	1.26689e-05	1.22966e-09	2.76522e-23	0.000169951	6.09394e-08	Y	Y	Y	0	0	NA	NA	NA
chr1_44773982_44785416	-2.18496	-0.66213	1.52283	3.26991e-24	0.00129568	7.8632e-12	4.63215e-22	0.00890138	6.31898e-10	Y	N	Y	0	0	NA	NA	NA
chr1_59787208_59812070	-5.57452	2.25375	7.82827	0.00016709	0.0135279	8.75562e-08	0.00153901	0.0448155	3.10638e-06	N	N	Y	0	0	NA	NA	NA
chr1_65830318_65831879	-1.10349	-0.485992	0.617499	7.53286e-19	0.000102076	1.93867e-06	7.96347e-17	0.00108072	4.8796e-05	Y	N	N	0	0	NA	NA	NA
chr1_91382197_91383711	-2.385	-1.31366	1.07134	2.74977e-16	5.16181e-06	0.00035352	2.16407e-14	7.56959e-05	0.00412956	Y	Y	N	0	0	NA	NA	NA
chr1_94107860_94140497	-1.39202	-4.51837	-3.12635	1.12776e-07	4.9455e-27	2.02626e-13	2.33565e-06	9.73026e-25	2.25252e-11	Y	Y	Y	0	0	NA	NA	NA
chr10_116247717_116251637	1.23092	-6.67921	-7.91012	0.0051446	9.93378e-08	2.35376e-10	0.0185441	2.04538e-06	1.28685e-08	Y	Y	Y	0	0	NA	NA	NA
chr10_116879949_116889297	2.31164	-6.38325	-8.69489	1.98254e-07	3.79559e-07	3.22564e-12	3.93342e-06	6.98289e-06	2.90744e-10	Y	Y	Y	0	0	NA	NA	NA
chr10_126631026_126631876	0.438002	-0.720428	-1.15843	0.000662391	8.53889e-08	4.61178e-18	0.00472293	1.7841e-06	8.5446e-16	N	N	Y	0	0	NA	NA	NA
chr10_5815805_5842668	0.782606	1.42884	0.646232	7.35521e-06	3.27841e-16	0.000114614	0.000103779	2.52402e-14	0.00163349	N	Y	N	0	0	NA	NA	NA
chr10_5827105_5842668	1.24141	2.08417	0.842765	9.65041e-09	4.88783e-22	5.46755e-05	2.57939e-07	5.96905e-20	0.000858084	Y	Y	N	0	0	NA	NA	NA
chr10_5827815_5842668	1.68755	2.7648	1.07725	0.000211125	9.24284e-10	0.00876803	0.00187628	2.85726e-08	0.0490216	Y	Y	N	0	0	NA	NA	NA
chr10_71243447_71258152	-4.86899	3.60045	8.46944	0.000351426	2.39248e-07	1.40362e-10	0.00284149	4.57999e-06	8.07084e-09	N	Y	Y	0	0	NA	NA	NA
chr10_89527430_89536184	-0.860142	1.38718	2.24732	0.00190759	6.79275e-08	1.04665e-16	0.0103536	1.44142e-06	1.74528e-14	N	Y	Y	0	0	NA	NA	NA
chr10_93185038_93221941	-2.62634	-6.18835	-3.56201	7.6918e-26	4.9716e-26	2.46563e-09	1.29717e-23	9.2668e-24	1.14206e-07	Y	Y	N	0	0	NA	NA	NA
chr11_110007388_110008139	1.04908	-1.62041	-2.66949	0.000234031	4.65945e-06	1.33953e-14	0.00204143	6.91885e-05	1.7519e-12	N	Y	Y	0	0	NA	NA	NA
chr11_46515158_46534363	-1.68624	-2.93348	-1.24724	1.49371e-10	5.16105e-23	4.18121e-05	5.31657e-09	7.02995e-21	0.000680211	Y	Y	Y	0	0	NA	NA	NA
chr11_65661485_65664477	3.05612	1.5977	-1.45842	2.19485e-14	0.000144934	0.000105605	1.32873e-12	0.00144996	0.00152882	Y	N	Y	0	0	NA	NA	NA
chr11_68115315_68115711	1.88265	5.65168	3.76904	5.71788e-07	2.89594e-52	3.03285e-26	1.03053e-05	2.05119e-49	1.19872e-23	Y	Y	Y	0	0	NA	NA	NA
chr11_68115315_68133170	1.12591	2.52661	1.4007	0.00513338	1.37948e-10	0.000123143	0.0185225	5.03651e-09	0.00171475	N	Y	Y	0	0	NA	NA	NA
chr11_72468812_72470426	5.9891	9.18147	3.19237	4.68077e-05	2.75839e-10	0.00032084	0.000530462	9.43849e-09	0.00380784	N	Y	N	0	0	NA	NA	NA
chr12_116668338_116675510	0.570205	-1.48968	-2.05989	0.0013662	2.79989e-14	3.05522e-26	0.00817989	1.73262e-12	1.19872e-23	N	Y	Y	0	0	NA	NA	NA
chr12_120592774_120593523	0.665273	1.19396	0.528686	2.29268e-08	1.72683e-23	6.61777e-06	5.61905e-07	2.49615e-21	0.000144611	N	Y	N	0	0	NA	NA	NA
chr12_46633462_46648719	-2.45103	-1.60912	0.841917	8.12142e-18	1.27887e-08	0.00555073	7.66987e-16	3.1128e-07	0.0347193	Y	Y	N	0	0	NA	NA	NA
chr12_65720606_65762806	-1.42605	-4.42383	-2.99777	0.00171238	2.40234e-12	2.71036e-06	0.00962604	1.15754e-10	6.55005e-05	Y	Y	Y	0	0	NA	NA	NA
chr13_103275227_103280274	1.16835	2.53856	1.3702	0.000475201	9.2822e-15	6.12334e-06	0.00360558	5.92305e-13	0.000136142	N	Y	Y	0	0	NA	NA	NA
chr13_111274563_111276626	0.477565	3.05125	2.57368	0.0162065	8.15321e-58	9.798e-44	0.0497575	7.21865e-55	1.63382e-40	N	Y	Y	0	0	NA	NA	NA
chr13_24796957_24798720	5.53918	4.03199	-1.5072	5.2635e-12	9.65359e-07	0.00353871	2.38983e-10	1.64366e-05	0.0252711	Y	N	Y	0	0	NA	NA	NA
chr13_33091994_33101669	-0.466135	-1.53059	-1.06446	5.26908e-05	6.90721e-33	2.02092e-16	0.000583139	1.95695e-30	3.13477e-14	N	Y	Y	0	0	NA	NA	NA
chr14_35331250_35331528	-1.90216	-0.880581	1.02158	6.65123e-09	0.00642044	0.00276367	1.8331e-07	0.029626	0.0209853	Y	N	N	0	0	NA	NA	NA
chr14_40124049_40125012	-5.52402	2.37073	7.89476	7.60241e-05	0.00198513	9.52489e-09	0.000806105	0.0123339	4.04656e-07	N	Y	Y	0	0	NA	NA	NA
chr14_55168780_55169298	0.958138	-8.50047	-9.45861	0.000132599	1.59268e-12	3.51275e-15	0.00126236	7.77995e-11	4.78164e-13	N	Y	Y	0	0	NA	NA	NA
chr14_80963812_80997230	-1.34854	-2.66749	-1.31895	3.81653e-07	8.1834e-19	1.80668e-05	7.24732e-06	7.7284e-17	0.000332889	Y	Y	Y	0	0	NA	NA	NA
chr14_99924616_99932150	-1.0495	-0.452042	0.597458	1.86674e-32	3.67524e-07	6.32912e-11	4.72219e-30	6.7791e-06	4.0205e-09	Y	N	N	0	0	NA	NA	NA
chr15_100821434_100871259	9.62113	5.47273	-4.1484	5.2428e-14	3.84872e-05	2.26469e-11	3.04383e-12	0.000458931	1.59005e-09	Y	N	Y	0	0	NA	NA	NA
chr15_43120126_43132631	-0.617178	-1.20618	-0.589006	0.0020126	1.01616e-08	0.00568762	0.0107021	2.52543e-07	0.0354378	N	Y	N	0	0	NA	NA	NA
chr15_51240217_51250991	-5.64652	-2.32088	3.32564	2.37631e-13	2.80145e-05	3.38706e-05	1.28484e-11	0.000344491	0.000567631	Y	Y	N	0	0	NA	NA	NA
chr15_56686363_56687032	-2.34702	-1.42729	0.919737	8.99145e-19	4.31861e-08	0.00140282	9.36565e-17	9.47019e-07	0.0126443	Y	Y	N	0	0	NA	NA	NA
chr15_60648118_60656722	2.50633	-3.49837	-6.0047	0.000114512	0.00365962	3.96968e-07	0.00111645	0.0198629	1.18734e-05	Y	N	Y	0	0	NA	NA	NA
chr15_75215989_75219228	-1.82019	-3.03881	-1.21862	3.06658e-06	1.09022e-11	0.00815861	4.73215e-05	4.88737e-10	0.0462738	Y	Y	N	0	0	NA	NA	NA
chr16_1004357_1004666	-0.676796	1.69277	2.36957	0.00645475	7.85759e-13	1.78162e-22	0.0224443	4.06243e-11	4.24408e-20	N	Y	Y	0	0	NA	NA	NA
chr16_4382216_4383520	1.62825	-6.10586	-7.73411	0.00248713	2.24739e-06	1.61224e-09	0.0122147	3.5374e-05	7.73643e-08	Y	Y	Y	0	0	NA	NA	NA
chr16_47531310_47549512	-0.64257	-1.38193	-0.739356	4.54954e-05	1.15381e-16	1.15078e-05	0.000517246	9.39357e-15	0.000230201	N	Y	N	0	0	NA	NA	NA
chr16_70497072_70497677	1.5105	2.44193	0.931428	2.27633e-07	3.98872e-17	0.000499355	4.46627e-06	3.44538e-15	0.00553272	Y	Y	N	0	0	NA	NA	NA
chr16_792250_792543	0.831363	1.75301	0.921643	0.00284433	2.89958e-10	0.000802708	0.0128744	9.77986e-09	0.00801583	N	Y	N	0	0	NA	NA	NA
chr16_85667520_85667738	-1.5037	0.862554	2.36626	2.88742e-05	0.0115034	4.12908e-11	0.000346051	0.0396056	2.8103e-09	Y	N	Y	0	0	NA	NA	NA
chr16_89484692_89488713	-2.31328	-0.899202	1.41408	5.91462e-13	0.0036406	2.2363e-05	3.0579e-11	0.0198204	0.000402051	Y	N	Y	0	0	NA	NA	NA
chr17_38652239_38652772	8.15009	5.01868	-3.13141	1.512e-08	0.000818533	0.000813452	3.8112e-07	0.00619821	0.00809012	Y	N	Y	0	0	NA	NA	NA
chr17_49118862_49133843	-1.00644	-1.7742	-0.767766	1.06318e-06	4.55423e-15	0.00091648	1.81458e-05	3.02602e-13	0.00896323	Y	Y	N	0	0	NA	NA	NA
chr17_57842332_57851246	-2.91752	-4.06062	-1.1431	1.68509e-17	1.56403e-27	0.00284866	1.49193e-15	3.46188e-25	0.021373	Y	Y	N	0	0	NA	NA	NA
chr17_80992911_81006661	-9.9197	-2.30052	7.61918	3.93247e-16	1.44853e-10	5.81201e-10	3.06084e-14	5.26152e-09	2.98201e-08	Y	Y	Y	0	0	NA	NA	NA
chr17_81006347_81006661	-8.60356	-2.31181	6.29174	6.55195e-09	0.0142849	2.94474e-05	1.81559e-07	0.0464983	0.000502773	Y	Y	N	0	0	NA	NA	NA
chr18_21644104_21649235	-0.337623	-0.828999	-0.491376	0.00692813	5.67977e-10	0.000273323	0.0237867	1.83698e-08	0.00332676	N	N	N	0	0	NA	NA	NA
chr18_9931807_9937063	-1.42688	-2.07284	-0.645955	3.13233e-33	1.25408e-57	1.32747e-06	8.87453e-31	9.86958e-55	3.48592e-05	Y	Y	N	0	0	NA	NA	NA
chr19_1031070_1032695	1.13514	2.34992	1.21478	1.21207e-05	5.65721e-20	7.55149e-07	0.000161678	6.07121e-18	2.11632e-05	Y	Y	Y	0	0	NA	NA	NA
chr19_49136701_49136912	2.11309	-6.11158	-8.22467	1.39311e-06	1.08759e-06	3.70562e-11	2.32721e-05	1.82544e-05	2.54809e-09	Y	Y	Y	0	0	NA	NA	NA
chr2_148730308_148733544	-1.92415	-0.94055	0.983603	3.52736e-15	9.60774e-05	0.000115769	2.3311e-13	0.00102797	0.00164293	Y	Y	N	0	0	NA	NA	NA
chr2_148730308_148739650	-0.727623	-2.50236	-1.77474	0.00256138	4.35821e-18	1.2685e-09	0.0123838	4.00899e-16	6.22127e-08	N	Y	Y	0	0	NA	NA	NA
chr2_170401231_170413807	1.67264	2.66367	0.991025	8.36764e-06	8.82373e-13	0.00317121	0.000116212	4.49629e-11	0.0233047	Y	Y	N	0	0	NA	NA	NA
chr2_225400245_225422573	-0.883751	-1.56873	-0.68498	1.98088e-06	4.614e-15	0.000783745	3.17434e-05	3.02602e-13	0.00791275	N	Y	N	0	0	NA	NA	NA
chr2_38812786_38818790	0.926975	-0.925493	-1.85247	0.00568191	0.0137773	4.98543e-07	0.0200823	0.0452409	1.45209e-05	N	N	Y	0	0	NA	NA	NA
chr2_58449077_58459247	-1.08741	0.549199	1.63661	4.89193e-20	1.43989e-06	6.06602e-43	5.49992e-18	2.3338e-05	8.09206e-40	Y	N	Y	0	0	NA	NA	NA
chr2_61749746_61753656	0.413218	-0.963816	-1.37703	0.0100798	3.19119e-08	1.64577e-15	0.0329515	7.17562e-07	2.38636e-13	N	Y	Y	0	0	NA	NA	NA
chr2_72945232_72960247	-1.53947	-2.8258	-1.28634	7.33752e-51	1.60474e-128	9.0237e-27	3.46478e-48	1.13664e-124	4.01254e-24	Y	Y	Y	0	0	NA	NA	NA
chr2_75745182_75749613	4.33601	-3.74682	-8.08283	5.29197e-07	0.0101878	7.90206e-09	9.73585e-06	0.0369483	3.46755e-07	Y	N	Y	0	0	NA	NA	NA
chr2_85595809_85598685	2.52186	1.31253	-1.20934	4.99765e-09	0.0042793	0.00317137	1.41594e-07	0.0223034	0.0233047	Y	N	N	0	0	NA	NA	NA
chr2_9419446_9437574	2.39096	-0.937955	-3.32891	6.53814e-17	0.0119873	2.64017e-21	5.4482e-15	0.0408596	6.07238e-19	Y	N	Y	0	0	NA	NA	NA
chr20_21346059_21349228	1.65793	2.70836	1.05044	1.9212e-09	4.47308e-23	2.23444e-05	5.84029e-08	6.21232e-21	0.000402051	Y	Y	N	0	0	NA	NA	NA
chr20_30954187_30959677	-0.699261	-1.62319	-0.923933	1.03877e-06	5.35678e-26	3.01052e-09	1.7815e-05	9.72874e-24	1.36622e-07	N	Y	N	0	0	NA	NA	NA
chr20_62407031_62422143	4.25648	1.86975	-2.38673	4.11847e-87	4.83174e-17	1.10242e-31	4.86185e-84	4.12328e-15	6.68467e-29	Y	Y	Y	0	0	NA	NA	NA
chr20_62421174_62422143	3.88999	1.92218	-1.96781	3.31354e-36	2.41868e-09	9.33084e-12	1.17349e-33	6.96402e-08	7.33308e-10	Y	Y	Y	0	0	NA	NA	NA
chr20_7976673_7990962	0.795708	-0.904356	-1.70006	0.00303634	0.00322623	1.56889e-08	0.0132347	0.0180216	6.34213e-07	N	N	Y	0	0	NA	NA	NA
chr21_16386665_16415895	-1.1581	-2.44684	-1.28874	9.44227e-11	7.94495e-38	2.08181e-11	3.63476e-09	3.31024e-35	1.49055e-09	Y	Y	Y	0	0	NA	NA	NA
chr21_42609440_42629253	4.75876	2.16176	-2.597	1.90959e-08	0.0134365	0.00100816	4.6964e-07	0.0445644	0.00970798	N	N	Y	0	0	NA	NA	NA
chr21_46538479_46548488	-8.82971	-3.80874	5.02097	1.13522e-10	3.76815e-06	0.000464879	4.29986e-09	5.67869e-05	0.00519387	Y	Y	N	0	0	NA	NA	NA
chr22_25771780_25777545	-2.08232	2.37486	4.45717	3.23562e-15	2.2219e-26	3.77521e-67	2.16207e-13	4.25343e-24	1.25903e-63	Y	Y	Y	0	0	NA	NA	NA
chr22_30032740_30038274	-0.727411	-2.31468	-1.58727	0.000140087	2.59829e-25	1.96492e-12	0.00132298	4.38183e-23	1.84591e-10	N	Y	Y	0	0	NA	NA	NA
chr3_11399892_11468400	-0.839543	-1.60435	-0.764811	0.000706543	1.26938e-09	0.00433511	0.00496966	3.80974e-08	0.0290313	N	Y	N	0	0	NA	NA	NA
chr3_138289160_138291774	11.0378	9.70083	-1.33697	2.07241e-20	4.61769e-16	4.20084e-11	2.40638e-18	3.47948e-14	2.83027e-09	Y	Y	Y	0	0	NA	NA	NA
chr3_138289160_138291826	-1.35425	-3.52261	-2.16835	2.46587e-08	2.41031e-36	1.85435e-14	5.993e-07	8.98539e-34	2.29047e-12	Y	Y	Y	0	0	NA	NA	NA
chr3_150834125_150845771	8.65082	5.96185	-2.68897	7.60069e-09	9.43648e-05	0.00587985	2.0786e-07	0.00101271	0.0361879	Y	N	N	0	0	NA	NA	NA
chr3_169854207_169867032	-1.35843	-2.82325	-1.46482	0.0018942	4.46731e-09	0.00271034	0.0103046	1.17192e-07	0.0207316	Y	Y	N	0	0	NA	NA	NA
chr3_171830242_171944737	-2.06208	-8.64328	-6.5812	3.37543e-09	1.31959e-12	7.987e-08	9.88399e-08	6.58216e-11	2.86416e-06	Y	Y	Y	0	0	NA	NA	NA
chr3_183097085_183107567	-1.53092	-9.48603	-7.95511	1.91954e-07	4.57942e-15	5.39792e-11	3.84071e-06	3.02602e-13	3.49555e-09	Y	Y	Y	0	0	NA	NA	NA
chr3_195101738_195133645	-1.41528	-2.90661	-1.49133	0.00431589	1.23675e-07	0.00756942	0.0162517	2.50999e-06	0.0437126	N	Y	N	0	0	NA	NA	NA
chr3_196118684_196129890	-0.996958	-2.30725	-1.31029	3.31875e-08	5.96319e-33	1.78078e-11	7.73246e-07	1.75989e-30	1.30525e-09	Y	Y	Y	0	0	NA	NA	NA
chr3_196812451_196846401	2.97857	1.37986	-1.59871	2.66958e-17	0.000163328	2.78545e-06	2.30593e-15	0.0015998	6.68893e-05	Y	N	Y	0	0	NA	NA	NA
chr3_196817783_196846401	2.89487	0.832659	-2.06221	1.28946e-26	0.00410185	1.72082e-14	2.28331e-24	0.021585	2.16564e-12	Y	N	Y	0	0	NA	NA	NA
chr3_196842798_196846401	0.433902	-1.37607	-1.80997	0.000775751	7.36917e-22	4.03447e-37	0.00534526	8.55669e-20	3.36374e-34	N	Y	Y	0	0	NA	NA	NA
chr3_67546222_67559327	-0.916753	-2.20051	-1.28376	0.000157524	3.08751e-16	2.62999e-06	0.00146039	2.40317e-14	6.42564e-05	N	Y	Y	0	0	NA	NA	NA
chr3_80680382_80683122	9.03269	7.25372	-1.77897	1.75505e-12	2.05232e-08	0.00101208	8.63265e-11	4.84233e-07	0.00971307	Y	Y	Y	0	0	NA	NA	NA
chr3_98568305_98600611	5.38438	4.03092	-1.35346	1.0926e-150	2.85784e-81	1.11664e-25	7.73892e-147	1.0121e-77	3.91998e-23	Y	Y	Y	0	0	NA	NA	NA
chr4_103225474_103236987	-1.16826	-3.29588	-2.12762	7.66465e-05	3.67491e-25	2.95752e-11	0.000810279	6.05335e-23	2.05486e-09	Y	Y	Y	0	0	NA	NA	NA
chr4_140046318_140060651	-1.79279	-5.35159	-3.5588	0.00122147	1.57115e-10	2.55997e-05	0.00754285	5.62043e-09	0.000449714	Y	Y	N	0	0	NA	NA	NA
chr4_39915231_39927553	-3.62449	-2.07875	1.54574	4.0419e-11	7.97702e-05	0.0068983	1.59937e-09	0.000874632	0.0407933	Y	Y	N	0	0	NA	NA	NA
chr4_4650704_4651269	-2.22026	-0.758886	1.46137	2.58041e-19	0.00117329	1.66299e-08	2.85579e-17	0.00827728	6.68202e-07	Y	N	Y	0	0	NA	NA	NA
chr4_6925100_6969151	1.24189	2.07697	0.835077	5.96113e-07	5.84907e-17	0.000462336	1.07164e-05	4.93202e-15	0.00517413	Y	Y	N	0	0	NA	NA	NA
chr5_10213603_10224173	-6.24672	-3.26285	2.98387	3.7994e-13	5.64598e-05	0.000621182	2.0083e-11	0.00064605	0.00656426	Y	Y	N	0	0	NA	NA	NA
chr5_124036707_124036962	11.6822	7.27846	-4.40376	1.4333e-09	0.000175997	0.00429692	4.45266e-08	0.00170636	0.0289793	Y	N	Y	0	0	NA	NA	NA
chr5_137320946_137324004	-0.869474	-1.62361	-0.754135	9.97185e-28	1.17792e-79	6.34021e-18	1.96196e-25	2.78108e-76	1.11287e-15	N	Y	N	0	0	NA	NA	NA
chr5_170305101_170323119	-1.62979	-2.56231	-0.932513	4.18754e-17	2.76203e-32	2.97282e-05	3.57354e-15	7.52441e-30	0.000505834	Y	Y	N	0	0	NA	NA	NA
chr5_176370336_176378578	10.2798	9.05685	-1.22296	1.13596e-17	5.52498e-14	2.06577e-06	1.04063e-15	3.23417e-12	5.14129e-05	Y	Y	Y	0	0	NA	NA	NA
chr5_34179118_34182972	5.90127	7.95347	2.0522	5.84916e-14	2.79617e-24	1.02096e-10	3.36826e-12	4.21389e-22	6.02637e-09	Y	Y	Y	0	0	NA	NA	NA
chr5_353845_376831	4.73136	7.95846	3.2271	9.1233e-05	4.26712e-11	0.00430305	0.000935171	1.70757e-09	0.0289912	N	Y	Y	0	0	NA	NA	NA
chr5_38991051_39003724	-3.53713	-2.62471	0.912419	3.716e-32	6.40608e-19	0.00491444	9.07601e-30	6.15491e-17	0.0318865	Y	Y	N	0	0	NA	NA	NA
chr5_38991051_39021238	-2.26303	-1.15801	1.10501	4.5214e-09	0.00240783	0.00524178	1.29656e-07	0.0143076	0.0331111	Y	Y	N	0	0	NA	NA	NA
chr5_39002637_39021238	-5.49329	-2.09689	3.3964	3.55442e-15	5.48162e-05	2.56831e-06	2.3311e-13	0.000628258	6.29803e-05	Y	Y	N	0	0	NA	NA	NA
chr5_40728447_40730445	-2.84876	-1.85162	0.997146	4.03389e-25	5.38804e-12	0.000859034	6.21132e-23	2.49435e-10	0.00846346	Y	Y	N	0	0	NA	NA	NA
chr5_43675613_43677908	-1.64104	-0.724027	0.917011	1.17911e-10	0.004204	0.000466739	4.44237e-09	0.0220407	0.00520594	Y	N	N	0	0	NA	NA	NA
chr5_43675613_43704502	-1.51985	-0.544549	0.975297	1.10313e-12	0.00975609	1.07914e-05	5.59314e-11	0.0361345	0.000218781	Y	N	N	0	0	NA	NA	NA
chr5_619105_620376	-3.76178	-2.81428	0.947503	3.70235e-59	1.01924e-34	0.000122999	2.38398e-56	3.28148e-32	0.00171475	Y	Y	N	0	0	NA	NA	NA
chr5_65284463_65290692	-2.28035	-2.78622	-0.505877	2.99912e-54	1.82362e-72	0.00148385	1.77023e-51	2.58334e-69	0.0131964	Y	Y	N	0	0	NA	NA	NA
chr5_79974746_80057497	-8.44459	-3.04511	5.39947	1.17962e-08	0.00180296	0.000402649	3.08313e-07	0.0114809	0.00463046	Y	Y	N	0	0	NA	NA	NA
chr5_95099212_95119667	-0.782284	-2.51398	-1.73169	0.00470054	1.32261e-13	5.10529e-07	0.0173768	7.37644e-12	1.48053e-05	N	Y	Y	0	0	NA	NA	NA
chr6_158994452_159010814	-1.12152	1.25078	2.3723	0.00228325	0.000467629	8.52045e-11	0.0116837	0.00394782	5.26217e-09	Y	Y	Y	0	0	NA	NA	NA
chr6_159001972_159010814	-0.698728	1.11247	1.8112	0.000466608	1.28419e-08	7.2014e-20	0.0035508	3.11505e-07	1.45556e-17	N	Y	Y	0	0	NA	NA	NA
chr6_17507400_17514185	-8.81191	-2.72672	6.0852	7.71091e-10	0.0017146	3.12205e-05	2.48256e-08	0.0110706	0.000527192	Y	Y	N	0	0	NA	NA	NA
chr6_34574332_34574681	-1.69846	-2.33983	-0.641366	6.0547e-14	9.27674e-23	0.00841719	3.4585e-12	1.2168e-20	0.0474178	Y	Y	N	0	0	NA	NA	NA
chr6_87920169_87928449	0.789827	-0.896558	-1.68639	0.000958279	0.000891856	1.89228e-10	0.00629053	0.0066425	1.06962e-08	N	N	Y	0	0	NA	NA	NA
chr7_128281257_128289036	10.1021	8.06321	-2.03886	5.43935e-17	3.09977e-11	9.86373e-12	4.58654e-15	1.28396e-09	7.65013e-10	Y	Y	Y	0	0	NA	NA	NA
chr7_155295716_155301792	7.70206	9.119	1.41694	7.29315e-10	2.69201e-13	0.00105026	2.35879e-08	1.44451e-11	0.0100074	Y	Y	Y	0	0	NA	NA	NA
chr7_155556503_155567341	-6.11816	2.16405	8.28221	5.51945e-06	0.00118128	5.24666e-10	7.99473e-05	0.00831707	2.734e-08	Y	Y	Y	0	0	NA	NA	NA
chr7_157449049_157475629	5.70489	9.224	3.51911	8.76244e-05	1.22469e-10	4.19283e-05	0.000903411	4.53157e-09	0.000680442	N	Y	Y	0	0	NA	NA	NA
chr7_1937836_1976533	1.98538	1.20502	-0.780355	5.03665e-27	4.93644e-10	1.1836e-05	9.64178e-25	1.61874e-08	0.000235659	Y	Y	N	0	0	NA	NA	NA
chr7_24663285_24681487	-1.16644	1.05979	2.22622	2.13861e-05	1.67485e-05	1.78776e-16	0.000267629	0.000218873	2.90838e-14	Y	N	Y	0	0	NA	NA	NA
chr7_3658712_3681737	3.10885	-6.88533	-9.99418	8.72679e-34	1.09274e-08	7.0282e-17	2.57549e-31	2.69682e-07	1.202e-14	Y	Y	Y	0	0	NA	NA	NA
chr7_42187825_42188067	4.22412	-7.62707	-11.8512	1.64201e-94	1.76471e-10	2.44429e-23	2.90759e-91	6.18782e-09	6.52135e-21	Y	Y	Y	0	0	NA	NA	NA
chr7_42187825_42212285	2.9093	-5.40832	-8.31762	2.77715e-08	2.6172e-05	5.34628e-11	6.64547e-07	0.000325221	3.49555e-09	Y	Y	Y	0	0	NA	NA	NA
chr7_47474880_47481653	1.28855	2.53385	1.2453	0.00628706	6.08576e-08	0.00560336	0.0219908	1.29836e-06	0.0349893	N	Y	N	0	0	NA	NA	NA
chr7_716866_751164	2.52498	1.66812	-0.85686	7.90623e-70	1.61411e-30	8.15318e-10	6.99998e-67	3.81091e-28	4.11983e-08	Y	Y	N	0	0	NA	NA	NA
chr7_99621042_99621930	2.59804	2.20863	-0.389412	9.37532e-90	2.75753e-61	0.000561391	1.32811e-86	2.79023e-58	0.00607869	Y	Y	N	0	0	NA	NA	NA
chr8_100182267_100205285	-7.9418	-2.77273	5.16907	5.65257e-07	0.015207	0.00158099	1.02397e-05	0.0490043	0.0138207	Y	Y	N	0	0	NA	NA	NA
chr8_128902835_128903244	1.04195	-0.532686	-1.57464	5.39474e-15	0.000106985	7.44095e-31	3.47372e-13	0.00112246	4.13593e-28	Y	N	Y	0	0	NA	NA	NA
chr8_131164982_131181313	3.06615	-5.77054	-8.83669	1.07853e-14	3.3161e-06	5.61923e-13	6.88216e-13	5.073e-05	5.85629e-11	Y	N	Y	0	0	NA	NA	NA
chr8_131370263_131374017	2.12013	-4.68461	-6.80474	1.1169e-26	1.66735e-19	6.14532e-40	2.02845e-24	1.71158e-17	6.83155e-37	Y	Y	Y	0	0	NA	NA	NA
chr8_131370263_131414216	2.40984	-5.937	-8.34685	2.70385e-08	2.13008e-06	1.67987e-11	6.51406e-07	3.38282e-05	1.24497e-09	Y	Y	Y	0	0	NA	NA	NA
chr8_141889570_141900868	-2.46775	-3.34537	-0.877613	1.02713e-32	7.72434e-41	0.000943789	2.6945e-30	3.64743e-38	0.0091765	Y	Y	N	0	0	NA	NA	NA
chr8_26439485_26441499	-0.947421	-1.80968	-0.862255	2.32506e-06	6.58051e-18	4.78329e-05	3.65965e-05	5.97561e-16	0.000766936	N	Y	N	0	0	NA	NA	NA
chr8_48320423_48353104	-1.65949	-2.47672	-0.81723	3.92409e-10	3.4937e-17	0.00708525	1.3049e-08	3.05505e-15	0.0416137	Y	Y	N	0	0	NA	NA	NA
chr8_74585342_74601048	-1.21917	-0.305761	0.913408	7.11703e-22	0.0146744	4.43046e-12	9.5113e-20	0.0475474	3.78861e-10	Y	N	N	0	0	NA	NA	NA
chr8_99718695_99719539	-1.60316	-0.926478	0.676685	3.95719e-14	1.25246e-05	0.0016279	2.35536e-12	0.000168521	0.0140649	Y	N	N	0	0	NA	NA	NA
chr9_111868788_111870850	-0.638744	-1.63108	-0.992332	0.00391953	1.22838e-10	0.000120302	0.015154	4.53157e-09	0.00168929	N	Y	Y	0	0	NA	NA	NA
chr9_134312007_134314448	-0.671708	-1.2954	-0.623691	0.00113411	9.09181e-09	0.0066319	0.00708875	2.28359e-07	0.0396725	N	Y	N	0	0	NA	NA	NA
chr9_139115853_139118720	1.03486	2.60336	1.5685	0.00242437	4.43421e-15	3.74488e-07	0.0120843	2.99119e-13	1.13214e-05	N	Y	Y	0	0	NA	NA	NA
chr9_14146688_14179779	1.4647	-7.12469	-8.58939	0.000235066	9.41806e-09	3.77912e-12	0.00204794	2.34888e-07	3.3609e-10	Y	Y	Y	0	0	NA	NA	NA
chr9_33953283_33963789	0.88213	0.495376	-0.386754	1.17339e-14	2.2658e-05	0.00076587	7.42064e-13	0.000287096	0.00778712	N	N	N	0	0	NA	NA	NA
chr9_33971649_33973235	1.35003	0.677911	-0.672119	5.6146e-08	0.00897181	0.00691756	1.25057e-06	0.0348963	0.0408681	Y	N	N	0	0	NA	NA	NA
chr9_6814631_6893232	2.14857	4.36907	2.2205	0.000265545	3.21045e-14	7.91984e-06	0.00226493	1.96031e-12	0.000167699	N	Y	Y	0	0	NA	NA	NA
chr9_6849507_6893232	1.05706	2.20391	1.14685	0.00248066	1.65972e-10	0.000422484	0.0122147	5.84865e-09	0.00481704	N	Y	Y	0	0	NA	NA	NA
chr9_91680444_91692818	-6.32146	2.2415	8.56296	8.56949e-06	0.00530343	1.23341e-09	0.000118319	0.0259602	6.09394e-08	Y	Y	Y	0	0	NA	NA	NA
chrX_106331666_106332069	-0.567508	0.397769	0.965277	5.11084e-05	0.0039763	1.08581e-11	0.000567399	0.0211442	8.32455e-10	N	N	N	0	0	NA	NA	NA
chr5_167927596_167929110	-1.8158	-1.33002	0.485785	8.90219e-05	0.00438924	0.312775	0.000916485	0.0227758	0.575433	Y	Y	N	1.64226	4.49051	2.00843	0.0106223	0.995233
chr8_11666303_11696082	-5.77401	0.908935	6.68295	0.00334611	0.568889	0.000673837	0.0138115	0.734361	0.00703364	N	N	N	2.15648	5.13757	1.91354	0.0115472	0.995233
chr1_144595835_144596473	-5.96697	-5.25132	0	0.0028618	0.00867667	1	0.0128858	0.034477	NA	NA	NA	NA	4.97115	2.78706	-1.86602	0.015518	0.995233
chr9_33624261_33624419	-6.74486	-6.02922	0	0.00126735	0.00396067	1	0.0077393	0.0211133	1	N	N	N	4.79984	7.69234	1.63745	0.0256679	0.995233
chr20_34312492_34313077	1.10644	1.14913	0.0426808	0.00273808	0.00238867	0.905692	0.0127507	0.0142176	1	N	N	N	2.34053	5.2505	1.73575	0.0269005	0.995233
chr1_59805630_59812070	-2.00407	0.833656	2.83772	0.00861641	0.254903	0.000196157	0.0285989	0.43744	0.00253069	N	N	N	0.588607	2.5684	2.06859	0.03124	0.995233
chr20_18491466_18492926	-6.46747	-0.362037	6.10543	0.000723918	0.813806	0.00151973	0.00507674	0.910554	0.0134278	Y	N	N	1.02385	4.08506	1.84884	0.0361706	0.995233
chr5_133316420_133316647	6.23698	0	-5.53744	0.00320344	1	0.00887313	0.0135221	1	0.0493754	Y	N	N	2.68902	5.50874	1.54092	0.0390437	0.995233
chr13_45725822_45781640	0.41581	-1.72776	-2.14357	0.308624	0.000440644	1.09105e-05	0.499996	0.00376943	0.000220525	N	N	Y	0.782591	3.012	1.86649	0.0436857	0.995233
chr2_47606092_47607108	7.78491	7.68061	-0.1043	7.56841e-08	1.23108e-07	0.903391	1.62445e-06	2.50566e-06	1	Y	Y	N	4.69196	6.78098	1.39122	0.0438949	0.995233
chr3_122928046_122978436	-0.447098	-6.06602	-5.61892	0.777069	0.00194892	0.00416975	0.87909	0.0121409	0.0285377	N	Y	N	0.695314	2.82138	1.8492	0.0497888	0.995233
chr5_179135240_179136060	2.32247	1.94517	-0.377304	5.82586e-05	0.00102816	0.482835	0.000639761	0.00749279	0.752984	Y	N	N	2.32325	5.87279	1.60102	0.0508676	0.995233
chr18_12814202_12836890	2.69077	2.43656	-0.254215	4.48876e-06	4.63762e-05	0.629844	6.65145e-05	0.000541157	0.868884	Y	Y	N	1.19456	3.49133	1.67772	0.0531933	0.995233
chrX_130522991_130533678	-6.22649	-5.51085	0	0.00246015	0.00735883	1	0.012184	0.0319379	1	Y	Y	N	2.07045	0.243313	-1.83161	0.0674215	0.995233
chr12_4626227_4628046	3.44018	3.3187	-0.12148	0.00487805	0.00716091	0.909794	0.0178559	0.031582	1	N	N	N	0.695314	2.64636	1.7434	0.0674564	0.995233
chr1_23356962_23370979	-7.96972	-1.0861	6.88362	6.83908e-07	0.329504	2.05848e-05	1.21103e-05	0.519377	0.000374117	N	N	N	0.437042	2.44446	1.71834	0.0795906	0.995233
chr7_135327940_135330979	6.31297	0	-5.61344	0.00316161	1	0.00867776	0.0135052	1	0.0486801	Y	N	N	1.58578	3.69625	1.45373	0.0797935	0.995233
chr14_103894724_103923549	-5.93146	-5.21582	0	0.00385312	0.0110452	1	0.014979	0.0384817	NA	Y	N	N	0.330335	2.2995	1.70934	0.0842253	0.995233
chrX_16875717_16881223	-7.41656	-1.50192	5.91464	4.09556e-05	0.286303	0.00123	0.000469399	0.471272	0.0112849	Y	N	N	1.28212	3.7571	1.48049	0.0873051	0.995233
chr22_46085592_46114373	-1.99161	-1.58918	0.402433	5.92991e-35	2.62805e-22	0.0179297	1.90916e-32	3.2657e-20	0.0832229	Y	Y	N	1.98512	4.13924	1.32916	0.0945898	0.995233
chr7_127447538_127528065	-3.12975	0.21883	3.34858	0.00491359	0.828877	0.00274174	0.0179397	0.920498	0.0208522	N	N	N	1.02385	3.72411	1.50116	0.095138	0.995233
chr2_219299249_219300157	0	8.64825	8.66435	1	5.98012e-09	5.60548e-09	1	1.51818e-07	2.49257e-07	N	Y	Y	3.30685	5.37651	1.24355	0.0969334	0.995233
chr7_30363258_30363918	-0.172182	-7.31054	-7.13836	0.741149	1.17384e-08	2.60248e-08	0.855395	2.88692e-07	1.00338e-06	N	Y	Y	5.37425	4.17647	-1.09475	0.097638	0.995233
chr3_4418014_4461823	-6.35684	-5.64119	0	0.00228645	0.00679219	1	0.0116846	0.0307487	1	Y	Y	N	0.451262	2.21645	1.62397	0.0991747	0.995233
chr10_116719485_116734144	-0.971279	-4.24269	-3.27141	0.107004	9.68926e-07	0.00018032	0.232559	1.64578e-05	0.00233541	N	Y	N	0.330335	2.21215	1.62474	0.101861	0.995233
chr17_45043900_45047675	-5.87429	-5.15864	0	0.0043269	0.0122214	1	0.0162586	0.041359	NA	Y	N	N	9.76893	8.85646	-0.978662	0.105442	0.995233
chr5_167915607_167919852	-7.55307	-6.83742	0	1.67061e-05	9.73851e-05	1	0.000212823	0.00103882	1	Y	Y	N	0.192991	1.8349	1.59778	0.111356	0.995233
chr5_133534777_133541822	-0.234981	-1.72925	-1.49427	0.428029	1.69926e-07	6.7438e-06	0.619859	3.36198e-06	0.000146518	N	Y	Y	2.43211	4.82225	1.21427	0.114487	0.995233
chr3_33109722_33110462	-1.81349	-3.87409	-2.06061	0.00996298	1.30966e-06	0.0111358	0.03264	2.14729e-05	0.0586233	Y	Y	N	0.994741	3.25512	1.46546	0.115562	0.995233
chr7_2405952_2409317	4.04924	4.0938	0.0445543	0.00144643	0.00139163	0.964359	0.0085092	0.00940481	1	Y	N	N	1.98836	4.11613	1.23553	0.123391	0.995233
chr3_149613260_149639014	1.54163	-0.0382076	-1.57984	1.88041e-07	0.903719	2.44905e-07	3.77306e-06	0.968582	7.74178e-06	Y	N	Y	0.76917	2.77775	1.40477	0.14129	0.995233
chr11_9451221_9452550	-0.780485	-0.0778735	0.702611	6.07797e-07	0.618746	9.5117e-06	1.08439e-05	0.771581	0.000195812	N	N	N	0.662162	2.72728	1.3995	0.1459	0.995233
chr9_20819795_20823114	-1.14479	-1.40511	-0.260314	6.31599e-08	1.63546e-10	0.24583	1.38075e-06	5.79198e-09	0.492695	Y	Y	N	0.192991	1.78721	1.38712	0.167396	0.995233
chr7_38247048_38259261	3.82407	3.13825	-0.685816	0.000864496	0.00696696	0.507278	0.0058372	0.0311259	0.773205	N	N	N	0.451262	1.91201	1.36401	0.171314	0.995233
chr1_22404922_22413359	-1.505	-0.551405	0.953597	1.01452e-06	0.0717111	0.00232431	1.75694e-05	0.170446	0.0184123	Y	N	N	2.72696	5.93178	1.09527	0.185203	0.995233
chr2_32523303_32532259	-0.970988	-6.11453	-5.14354	0.360253	9.33238e-05	0.00109136	0.557255	0.00100605	0.0103107	N	Y	N	1.0926	0	-1.25621	0.191632	0.995233
chr12_102301964_102308010	-5.89055	-5.1749	0	0.00444141	0.0124423	1	0.0166359	0.0419064	NA	Y	N	N	0.192991	1.56611	1.30753	0.192768	0.995233
chr11_102233627_102239279	2.89846	3.10042	0.201956	1.88134e-08	2.3632e-09	0.659217	4.64304e-07	6.86007e-08	0.888642	Y	Y	N	1.11492	2.78603	1.17898	0.205243	0.995233
chr2_178326621_178333252	-6.73168	-1.33225	5.39943	0.000265729	0.365456	0.00399628	0.00226493	0.554794	0.0276506	N	N	N	0.192991	1.66009	1.2682	0.206666	0.995233
chr2_62100137_62107529	6.05856	6.56399	0.505429	0.012328	0.00674068	0.812454	0.0392093	0.0305857	0.983113	N	Y	N	1.2804	3.90117	1.11854	0.213484	0.995233
chr14_102486230_102489217	0.500393	-1.63559	-2.13599	0.160452	9.47272e-05	2.64332e-07	0.318877	0.00101506	8.23875e-06	N	N	Y	0.718636	2.3689	1.17559	0.228568	0.995233
chr11_34097783_34098189	3.58697	3.99686	0.40989	0.00851339	0.00348921	0.711195	0.0282835	0.0192178	0.923951	N	N	N	0.895061	2.63311	1.14726	0.233311	0.995233
chr3_12531283_12538053	-6.92298	-0.791507	6.13147	0.00198625	0.681247	0.00646321	0.0106339	0.818814	0.0389428	Y	N	N	0.330335	1.81086	1.19619	0.233586	0.995233
chr18_21095820_21099138	6.96415	6.3568	-0.607353	0.000109976	0.000454848	0.661959	0.00108039	0.00385831	0.890534	Y	N	N	0.192991	1.26091	1.1867	0.234508	0.995233
chr4_154191487_154197282	-0.992744	-5.06278	-4.07004	0.0425459	2.37215e-10	4.115e-07	0.107472	8.23623e-09	1.21987e-05	Y	Y	Y	0.192991	1.63497	1.19148	0.235039	0.995233
chr14_31097415_31107453	-6.99115	-1.70194	5.28921	0.000107645	0.232247	0.00405543	0.00106211	0.409235	0.027944	Y	N	N	0.662162	2.04527	1.16145	0.243449	0.995233
chr8_141710990_141716304	-1.08499	0.463374	1.54837	0.00409917	0.205999	4.64741e-05	0.015652	0.377025	0.000748749	N	N	Y	0.524319	1.99182	1.16217	0.243723	0.995233
chrX_44833911_44879975	-5.95925	-5.2436	0	0.00281588	0.00857804	1	0.0128554	0.0344112	NA	Y	N	N	0.330335	1.53449	1.16391	0.246685	0.995233
chr2_43655239_43755127	6.26781	7.40629	1.13848	1.70314e-05	3.45688e-07	0.195248	0.000216577	6.39298e-06	0.42669	Y	Y	N	0.192991	1.55099	1.14624	0.25266	0.995233
chr2_240929491_240954277	-2.68814	-0.121004	2.56714	0.00160586	0.879832	0.0028467	0.00916545	0.953281	0.021373	Y	N	N	4.39387	5.66211	0.8199	0.253258	0.995233
chr11_61205097_61205585	1.13559	1.51786	0.382279	0.000959639	1.21425e-05	0.250024	0.00629363	0.000164762	0.49915	Y	Y	N	0	1.33455	1.09784	0.260049	0.995233
chr12_51173923_51203372	-2.47389	-2.38527	0.0886263	2.60468e-29	5.95086e-25	0.719747	5.95126e-27	9.36665e-23	0.929111	Y	Y	N	0	1.10291	1.07192	0.265159	0.995233
chr15_49517402_49531564	-1.21072	-0.664126	0.546592	4.01932e-06	0.0120148	0.0449049	6.0572e-05	0.040928	0.159402	Y	N	N	0.524319	2.115	1.10594	0.266529	0.995233
chr12_51442817_51450285	-6.37079	-5.65515	0	0.0030658	0.00857773	1	0.0132733	0.0344112	1	Y	Y	N	0.814894	2.6114	1.06947	0.266692	0.995233
chr15_67893023_67956983	-6.45468	-5.73904	0	0.00177784	0.00546011	1	0.00988417	0.02646	1	Y	Y	N	1.19456	2.71749	1.01263	0.271991	0.995233
chr5_72157635_72161556	-2.6327	-2.47325	0.15945	1.11279e-13	2.9864e-11	0.691283	6.20619e-12	1.24428e-09	0.908723	Y	Y	N	0.524319	1.91173	1.09427	0.273332	0.995233
chr11_65269792_65272066	-6.84645	-6.13081	0	0.000703401	0.00241267	1	0.00495247	0.0143243	1	Y	Y	N	1.68103	4.11402	0.934654	0.278995	0.995233
chr6_57046830_57048709	-6.39847	-5.68283	0	0.00205737	0.00619772	1	0.0108587	0.0289542	1	Y	Y	N	0.330335	1.65766	1.08419	0.280539	0.995233
chr9_33886879_33900269	-6.37673	-5.66109	0	0.0025348	0.00735507	1	0.0123149	0.0319379	1	Y	Y	N	0.662162	2.23375	1.05074	0.286548	0.995233
chr13_100925450_100992513	-6.37486	-5.65922	0	0.0029266	0.00825809	1	0.0129797	0.0338803	1	Y	Y	N	0.930633	2.81292	1.01185	0.287039	0.995233
chr9_133333788_133333976	-6.38938	-5.67374	0	0.00257946	0.00744414	1	0.0124372	0.0321113	1	Y	Y	N	4.12253	5.70049	0.762221	0.291726	0.995233
chr17_40990748_40991397	-6.37663	-0.0110493	6.36558	0.000837951	0.994228	0.000897386	0.00569051	1	0.0088023	Y	N	N	1.30968	2.66958	0.95972	0.294469	0.995233
chr9_126429305_126531842	-6.23187	-5.51623	0	0.00611919	0.0152443	1	0.0214733	0.0490693	1	Y	Y	N	0.192991	1.1333	1.02325	0.301494	0.995233
chr11_86267595_86270865	0.0624476	-1.28131	-1.34376	0.896422	0.0108179	0.00747775	0.947825	0.0381209	0.0432956	N	N	N	0.192991	1.0176	1.00515	0.306028	0.995233
chr6_2116005_2124965	-0.481489	1.74335	2.22484	0.355408	0.00049089	1.24357e-05	0.552336	0.0041099	0.000245402	N	Y	Y	1.61378	3.03596	0.892968	0.30671	0.995233
chr21_34787195_34805178	4.69729	-1.16746	-5.86475	0.0117711	0.5951	0.0027324	0.0376921	0.752342	0.020818	Y	N	N	1.57302	3.22599	0.879343	0.312221	0.995233
chr5_170648762_170669824	-7.74814	-7.0325	0	3.08464e-06	2.29348e-05	1	4.74968e-05	0.000290084	1	Y	Y	N	0	1.17375	0.950884	0.321215	0.995233
chr14_103915256_103923549	-6.03591	-5.32026	0	0.00282673	0.00848969	1	0.0128554	0.0342635	NA	Y	N	N	0.782591	1.96539	0.977322	0.322133	0.995233
chr19_53887125_53888280	-5.82946	-5.11381	0	0.00277801	0.0086886	1	0.0128418	0.034477	NA	Y	N	N	0.437042	1.80438	0.981062	0.328361	0.995233
chr3_157839892_157841780	0.384864	0.354362	-0.030502	0.00161663	0.00476436	0.805567	0.00921589	0.0240527	0.98014	N	N	N	0.437042	1.78039	0.972776	0.332474	0.995233
chr1_23356936_23377013	-4.77051	-6.53134	-1.76083	0.00588279	0.000695955	0.399205	0.0207406	0.00547717	0.673419	Y	Y	N	0.598163	2.10058	0.963049	0.332874	0.995233
chr3_136136727_136141886	0.516479	-5.16045	-5.67693	0.660365	0.00176831	0.000556017	0.796147	0.0113245	0.00604851	N	N	N	0.598163	2.1041	0.959385	0.334552	0.995233
chr1_94953098_94956803	-1.6179	-0.0254258	1.59247	0.00183421	0.960163	0.00237249	0.010118	1	0.0187272	N	N	N	0.930633	2.45022	0.934344	0.33541	0.995233
chr11_62549366_62550297	1.60686	1.44959	-0.157268	0.00558318	0.0148876	0.777182	0.0198026	0.0481061	0.964071	N	N	N	0.524319	1.54239	0.96608	0.33628	0.995233
chr5_151166164_151175136	4.30409	3.93407	-0.370023	0.00132945	0.00370908	0.732131	0.00800723	0.0200852	0.936757	Y	N	N	0.598163	1.7857	0.960658	0.336686	0.995233
chr5_72151601_72161556	-3.87542	-5.02475	-1.14933	2.02665e-24	6.70382e-26	0.0235003	2.92954e-22	1.182e-23	0.10152	Y	Y	N	0.524319	1.81869	0.958512	0.338627	0.995233
chr5_93410351_93413070	6.72431	0	-6.02478	0.00149569	1	0.00443904	0.00869785	1	0.0294318	N	N	Y	1.25212	0.273577	-0.948071	0.338632	0.995233
chr2_191774989_191778090	7.528	7.81087	0.282878	1.33799e-08	4.03268e-09	0.652879	3.4337e-07	1.09439e-07	0.884384	Y	Y	N	0.598163	2.08374	0.948414	0.34041	0.995233
chr14_66096210_66136198	4.59832	4.67188	0.0735643	0.0107541	0.00982836	0.960954	0.0349091	0.0362909	1	N	Y	N	0.76917	2.42834	0.922446	0.343891	0.995233
chr13_99109422_99118815	5.21371	7.68927	2.47556	0.0126553	0.000209362	0.153934	0.0401061	0.0019825	0.365518	N	Y	N	1.906	3.816	0.782749	0.353935	0.995233
chr1_35879573_35881315	-1.46484	-1.63049	-0.165651	0.000830123	0.000412217	0.729207	0.00564277	0.00356065	0.935383	Y	Y	N	0.598163	1.8349	0.914621	0.360317	0.995233
chr2_58311224_58316858	-1.06261	-0.186445	0.876165	8.82963e-08	0.345293	1.55508e-05	1.87246e-06	0.535284	0.000294669	Y	N	N	0.437042	1.73542	0.915079	0.362256	0.995233
chr19_58904343_58904854	1.69097	2.25479	0.563821	1.82665e-07	3.77635e-12	0.0732233	3.67561e-06	1.75973e-10	0.218328	Y	Y	N	6.78196	8.0289	0.635995	0.365049	0.995233
chr3_195415404_195416309	-8.25962	-7.54397	0	1.34652e-08	2.12663e-07	1	3.4431e-07	4.12683e-06	1	Y	Y	N	0.729135	0	-0.790321	0.36532	0.995233
chr2_234678177_234681224	-6.68366	-5.96802	0	0.00110728	0.00358548	1	0.00700256	0.0196458	1	Y	Y	N	1.08456	0.273577	-0.883769	0.366159	0.995233
chr18_9927093_9937063	-6.09653	-5.38089	0	0.00401863	0.0111165	1	0.015376	0.0386352	NA	Y	Y	N	2.13941	3.94123	0.745187	0.368125	0.995233
chr5_21491430_21495291	-2.08839	0.220537	2.30893	1.13354e-21	0.263966	1.60575e-25	1.48683e-19	0.446542	5.18252e-23	Y	N	Y	0.598163	1.81558	0.896098	0.370249	0.995233
chr3_183584413_183585848	-5.87527	-5.15963	0	0.00315137	0.00951615	1	0.0134896	0.0358765	NA	Y	N	N	1.65553	2.9675	0.782939	0.371919	0.995233
chr3_136045645_136048826	-5.98739	0.0258912	6.01329	0.00354722	0.987921	0.00354434	0.0142563	1	0.0252763	Y	N	N	1.92618	3.16563	0.76693	0.372425	0.995233
chr1_46032241_46032692	-0.571105	2.0264	2.5975	0.285053	7.33182e-05	6.28394e-07	0.474054	0.000812696	1.80663e-05	N	Y	Y	1.19456	0.51689	-0.890072	0.374218	0.995233
chr5_81548381_81550144	-6.6733	-1.27569	5.39761	0.000318747	0.389364	0.0041553	0.00261531	0.577927	0.0284849	Y	N	N	6.47262	5.91408	-0.536569	0.380382	0.995233
chr2_184022172_184025923	-1.43554	-6.96261	-5.52708	0.0717328	7.16987e-07	9.46438e-05	0.168191	1.24777e-05	0.00140283	N	Y	N	0	1.11051	0.813661	0.385862	0.995233
chr10_121663596_121668642	3.57184	3.80011	0.228267	0.00336406	0.00188443	0.833683	0.0138211	0.0118749	0.992705	Y	N	N	0.598163	1.95662	0.861326	0.388298	0.995233
chr11_63426233_63426724	-0.793577	-3.75412	-2.96055	0.14052	2.41589e-09	2.8206e-06	0.287742	6.96402e-08	6.74315e-05	N	Y	N	0.437042	1.63108	0.865699	0.388893	0.995233
chr19_34699834_34706566	3.58105	2.32989	-1.25116	1.40164e-05	0.00609403	0.0949894	0.000185028	0.0286233	0.262135	Y	N	N	1.02385	2.7866	0.811514	0.393106	0.995233
chr9_74810416_74817658	-7.52315	-6.80751	0	2.47421e-05	0.000135643	1	0.000303724	0.00137251	1	Y	Y	N	0.192991	0.924561	0.824223	0.394195	0.995233
chr21_42613746_42622828	7.1612	0	-6.46167	0.000203429	1	0.000802784	0.0018193	1	0.00801583	Y	N	Y	1.30957	2.99997	0.771938	0.396247	0.995233
chr4_151223777_151242520	-6.49298	-5.77734	0	0.00176983	0.00540613	1	0.00985509	0.0262555	1	Y	Y	N	0.814894	2.38127	0.821047	0.399785	0.995233
chr3_142455221_142481155	-6.19406	-5.47842	0	0.0024537	0.00738351	1	0.0121705	0.0320131	1	Y	Y	N	7.25325	6.7391	-0.506039	0.40051	0.995233
chr3_4452549_4461830	-2.67218	-3.28679	-0.614616	1.02496e-24	2.88869e-27	0.0590587	1.51246e-22	5.84589e-25	0.188029	Y	Y	N	0.192991	1.13346	0.813091	0.405023	0.995233
chr13_48562676_48571158	6.68048	0	-5.98095	0.00145667	1	0.00437408	0.00856232	1	0.029138	Y	N	Y	0.330335	1.40704	0.8298	0.406946	0.995233
chrX_67731691_67742759	-2.60991	-1.81562	0.794291	2.56362e-07	0.000318653	0.138251	4.9885e-06	0.00286061	0.338522	Y	Y	N	0.662162	2.02526	0.814729	0.412842	0.995233
chr1_116562203_116563506	-7.22398	-6.50833	0	0.000181665	0.000745125	1	0.00165816	0.00579969	1	Y	Y	N	0	0.809102	0.727336	0.419488	0.995233
chr9_33960824_33973235	2.76815	2.23424	-0.533916	4.99804e-05	0.00118314	0.419247	0.000558377	0.00832194	0.693374	Y	Y	N	0	0.809102	0.727336	0.419488	0.995233
chr1_213415912_213436159	-6.5184	-5.80275	0	0.00159015	0.00493833	1	0.00911246	0.0247021	1	Y	Y	N	0.425388	1.48679	0.807927	0.420962	0.995233
chr15_94899366_94913409	-8.05233	-2.81543	5.2369	1.40279e-05	0.0584544	0.00569024	0.000185028	0.144716	0.0354378	Y	N	N	0.330335	1.32599	0.804192	0.421359	0.995233
chr9_4823548_4833228	-1.23317	0.385649	1.61882	7.83977e-05	0.20658	2.48226e-07	0.000825098	0.377504	7.80974e-06	Y	N	Y	0.330335	1.32599	0.804192	0.421359	0.995233
chr11_62638217_62639141	-7.53878	-6.82314	0	2.23511e-05	0.000124287	1	0.000277741	0.00127031	1	Y	Y	N	0.192991	1.2308	0.784606	0.425448	0.995233
chr15_67984817_67995746	-1.25565	-7.04668	-5.79103	0.326741	4.53481e-05	0.000843035	0.520654	0.000530034	0.0083428	N	Y	N	0.986211	1.6944	0.784251	0.427599	0.995233
chr1_23356962_23385660	-6.12003	-5.40438	0	0.00334978	0.0095802	1	0.0138181	0.035966	NA	Y	Y	N	1.30957	2.86972	0.728804	0.42783	0.995233
chr3_171965323_171969331	-1.13913	-3.34009	-2.20096	0.0190606	1.6361e-08	0.000240915	0.0571333	3.88876e-07	0.00297025	Y	Y	N	0.192991	1.17375	0.767169	0.435508	0.995233
chr17_76187051_76188866	-3.15771	4.41577	7.57348	0.120601	0.00812399	9.06292e-05	0.255448	0.0336452	0.00135119	N	Y	Y	0.258272	1.18127	0.759184	0.43986	0.995233
chr3_122422589_122427115	1.18731	-3.63259	-4.8199	0.111687	0.00106208	1.19771e-05	0.240815	0.00763727	0.00023776	N	N	Y	0	0.957225	0.694695	0.442603	0.995233
chr13_73467922_73505405	-5.92502	-5.20938	0	0.00298869	0.00904614	1	0.0131084	0.0349557	NA	Y	N	N	0.920434	2.1057	0.744356	0.44546	0.995233
chr7_959605_966280	0	7.04211	7.05822	1	0.000473314	0.000459365	1	0.00399105	0.00514952	N	Y	Y	1.28212	2.74791	0.705137	0.446363	0.995233
chr12_121220458_121222396	-2.45587	-2.93669	-0.480814	0.0133118	0.00347922	0.6351	0.0418399	0.0191781	0.872759	Y	N	N	0.524319	1.70745	0.763883	0.446849	0.995233
chr1_78183552_78191447	-0.757524	-7.55741	-6.79989	0.135557	3.04054e-09	1.02942e-07	0.280254	8.54608e-08	3.61381e-06	N	Y	Y	0.330335	1.27742	0.753466	0.44774	0.995233
chr6_158317859_158331057	3.46418	2.59391	-0.870276	9.68017e-08	9.33553e-05	0.138811	2.03456e-06	0.00100605	0.339146	Y	N	N	0.76917	2.0184	0.743174	0.453363	0.995233
chr12_19626182_19653155	-3.13722	-4.31237	-1.17514	5.18558e-10	3.41824e-14	0.045742	1.68484e-08	2.05181e-12	0.161428	Y	Y	N	0.524319	1.29117	0.734962	0.463555	0.995233
chr16_1859239_1859834	0.654429	-5.57327	-6.2277	0.678726	0.00452218	0.00147231	0.811104	0.0232202	0.013115	N	N	N	3.67592	3.29941	-0.555876	0.466171	0.995233
chr3_127800097_127806651	-7.25295	0.131831	7.38478	2.02069e-07	0.86451	1.32335e-07	3.99793e-06	0.944306	4.50343e-06	Y	N	Y	2.75561	3.66798	0.573522	0.469383	0.995233
chr1_224553581_224567357	-6.73302	-6.01738	0	0.001164	0.0037034	1	0.00723848	0.0200698	1	Y	Y	N	0.192991	1.05337	0.694026	0.472049	0.995233
chr19_3660964_3661999	1.11369	1.77323	0.659543	0.000347514	1.30414e-08	0.0251979	0.00282276	3.15264e-07	0.106373	Y	Y	N	0.598163	0	-0.577458	0.476538	0.995233
chr12_19615444_19626289	-1.84393	-2.13274	-0.288812	9.05056e-09	1.60281e-10	0.398789	2.45107e-07	5.70487e-09	0.673057	Y	Y	N	0	0.949704	0.637604	0.482539	0.995233
chr14_100551024_100563995	-7.30246	-6.58681	0	8.48687e-05	0.00039253	1	0.000878838	0.00341559	1	Y	Y	N	0.598163	1.78039	0.702236	0.483514	0.995233
chr19_46020921_46021352	2.82972	2.63628	-0.193442	1.40353e-07	1.36948e-06	0.689055	2.86491e-06	2.23503e-05	0.907046	Y	Y	N	0.920434	1.94336	0.685605	0.485343	0.995233
chr1_21097423_21100103	-0.89346	-1.43228	-0.538818	0.0138716	0.000174969	0.164493	0.0433404	0.00170234	0.381623	N	Y	N	1.07726	2.66016	0.666322	0.486098	0.995233
chr13_99500846_99508285	7.57414	0	-6.8746	2.78569e-05	1	0.00014279	0.000336133	1	0.00192019	Y	N	Y	0	0.850989	0.603702	0.493314	0.995233
chr7_98988516_98988876	3.69318	2.9689	-0.724282	8.42938e-07	9.34602e-05	0.291004	1.47057e-05	0.00100605	0.54939	Y	Y	N	4.30471	5.01152	0.446072	0.50506	0.995233
chr3_135979321_136035906	-5.76848	-5.05284	0	0.00482585	0.0135576	1	0.0177198	0.0448521	NA	N	N	N	3.31123	3.75372	0.520668	0.506342	0.995233
chr12_102291641_102295211	-7.77518	-7.05954	0	3.83682e-06	2.73119e-05	1	5.80688e-05	0.000337021	1	Y	Y	N	0	0.879687	0.584857	0.507213	0.995233
chr16_28123138_28137169	-5.6013	1.40903	7.01033	0.016012	0.484826	0.00250218	0.0492458	0.664221	0.0195199	Y	N	Y	0.695314	1.37805	0.665856	0.507405	0.995233
chr16_521295_539000	-6.40297	-5.68733	0	0.0037199	0.00997338	1	0.0147032	0.0365072	1	Y	Y	N	0	0.797988	0.577608	0.508226	0.995233
chr6_57372288_57398317	-2.36994	-3.04646	-0.676522	2.31526e-15	1.02835e-19	0.0545211	1.57682e-13	1.07115e-17	0.17835	NA	NA	NA	0.618379	1.1333	0.659262	0.511323	0.995233
chr7_80418622_80440017	-8.88561	-8.16997	0	2.44709e-11	8.3157e-10	1	1.00189e-09	2.59472e-08	1	Y	Y	N	0.814894	1.79616	0.647195	0.517255	0.995233
chr1_59787208_59844509	-4.85875	1.88249	6.74124	0.0107522	0.214405	0.000349818	0.0349091	0.387999	0.00409895	N	N	Y	0.192991	0.971285	0.61616	0.519227	0.995233
chr2_182786675_182793005	3.78153	5.88811	2.10658	0.000750295	1.17118e-07	0.0146872	0.00522124	2.39063e-06	0.0717158	N	Y	Y	1.87219	3.4234	0.573124	0.520395	0.995233
chr12_56493432_56494029	5.70609	6.8613	1.15521	0.00498154	0.000713036	0.489486	0.0181503	0.00558059	0.75848	Y	Y	N	0.524319	0	-0.513378	0.52235	0.995233
chr8_145245687_145255444	1.88277	1.81498	-0.0677876	8.03752e-08	3.26622e-07	0.841018	1.7096e-06	6.10412e-06	0.996525	Y	Y	N	0.524319	0	-0.513378	0.52235	0.995233
chr11_14880589_14882912	-5.67777	1.79077	7.46853	0.000228416	0.0763514	1.01576e-06	0.0020048	0.179428	2.75989e-05	N	N	Y	0.330335	1.05242	0.626177	0.524344	0.995233
chr2_190656516_190670480	0.247785	1.2996	1.05181	0.527001	0.000828959	0.00642421	0.700688	0.00625961	0.0387778	N	Y	N	0.330335	1.25012	0.630035	0.525734	0.995233
chr6_125366357_125379252	-6.49441	-5.77877	0	0.00188525	0.00568732	1	0.010277	0.0272737	1	Y	Y	N	0	0.836928	0.538311	0.536247	0.995233
chr2_191523884_191535185	-6.23287	0.905966	7.13883	5.0719e-05	0.370207	3.35256e-06	0.000564761	0.559218	7.84617e-05	Y	N	Y	0.695314	1.49929	0.616697	0.538627	0.995233
chr10_97250792_97253043	6.50647	0	-5.80694	0.0016173	1	0.00489618	0.00921589	1	0.0318299	Y	N	N	5.68029	5.29369	-0.389513	0.538972	0.995233
chr17_79928252_79943483	7.9146	0	-7.21506	8.12276e-07	1	6.91067e-06	1.42058e-05	1	0.000149298	Y	N	Y	4.47897	4.90968	0.393222	0.550277	0.995233
chr7_79828541_79842185	-6.1382	-5.42256	0	0.00544889	0.0140807	1	0.0193942	0.045947	NA	Y	Y	N	0.782591	1.63108	0.594143	0.552157	0.995233
chr5_80071513_80109560	0.109484	-2.82168	-2.93116	0.899891	0.00536971	0.00379238	0.949773	0.0261579	0.0265985	N	N	N	0.192991	0.957225	0.563162	0.552875	0.995233
chr7_35903162_35913385	-6.12256	-5.40692	0	0.00260358	0.00783527	1	0.0125084	0.033034	NA	Y	Y	N	1.7317	2.5807	0.549862	0.558461	0.995233
chr4_129913322_129925031	0.203887	-1.55872	-1.76261	0.556812	1.85779e-05	1.2392e-06	0.722723	0.000240562	3.28207e-05	N	Y	Y	0.192991	0.900173	0.55192	0.560991	0.995233
chr7_17885218_17890587	-0.723536	0.640347	1.36388	0.0151356	0.0263645	4.90512e-06	0.046835	0.0761893	0.000112045	N	N	Y	0.192991	0.900173	0.55192	0.560991	0.995233
chr13_113170754_113176823	-5.87695	1.39946	7.27641	0.000124783	0.161449	1.79197e-06	0.00119438	0.316333	4.54466e-05	Y	N	Y	0.437042	1.19455	0.568859	0.567104	0.995233
chr6_149899958_149901859	2.54752	3.92384	1.37631	0.0108067	7.20808e-05	0.0971315	0.0350315	0.000801489	0.266393	N	Y	N	0.718636	1.75977	0.555395	0.578839	0.995233
chr20_2944918_2945848	1.08384	-5.37723	-6.46106	0.230643	0.000269717	1.04708e-05	0.411394	0.00247141	0.000213579	N	Y	Y	0.994741	2.51138	0.530584	0.581844	0.995233
chr11_118484009_118484611	6.67984	0	-5.9803	0.00140383	1	0.00424478	0.00834872	1	0.0288228	Y	N	Y	0.437042	0	-0.440742	0.581888	0.995233
chr11_86778736_86802437	-1.40328	-0.836749	0.566534	4.52127e-09	0.000538808	0.0265966	1.29656e-07	0.00444281	0.109981	Y	N	N	0.437042	0	-0.440742	0.581888	0.995233
chr13_79951514_79953042	-6.16883	-0.0584849	6.11035	0.00197152	0.971481	0.00227999	0.010571	1	0.0181189	N	N	N	0.437042	0	-0.440742	0.581888	0.995233
chr17_1540003_1540356	0.762806	-5.81018	-6.57299	0.340597	4.05686e-05	3.11431e-06	0.536339	0.000479712	7.34008e-05	N	Y	Y	0.437042	0	-0.440742	0.581888	0.995233
chr20_45891032_45905539	4.69144	4.39194	-0.299504	8.59114e-06	3.66232e-05	0.704876	0.000118387	0.00043818	0.919759	Y	Y	N	0.437042	0	-0.440742	0.581888	0.995233
chr19_21368809_21369090	-5.88711	-5.17146	0	0.0054255	0.0145816	1	0.0193304	0.0473119	NA	N	N	N	3.44988	2.95496	-0.424766	0.584024	0.995233
chr7_99616854_99621930	6.59672	6.65459	0.0578682	1.52688e-05	1.41157e-05	0.953851	0.000197713	0.000187936	1	Y	Y	N	1.50417	2.4743	0.488799	0.595102	0.995233
chr14_92562437_92563182	-6.21669	-5.50105	0	0.00327449	0.00926288	1	0.0136834	0.0353647	1	Y	Y	N	0	0.677692	0.433798	0.598974	0.995233
chrX_68250842_68256959	8.03901	0	-7.33947	1.89673e-06	1	1.36421e-05	3.06724e-05	1	0.000264515	Y	N	Y	0	0.677692	0.433798	0.598974	0.995233
chr19_11258494_11258789	4.7904	5.24573	0.45533	1.36157e-09	3.52045e-11	0.397458	4.24846e-08	1.43306e-09	0.67166	Y	Y	N	0.192991	0.817309	0.489578	0.600662	0.995233
chr2_198367763_198368054	2.34692	1.84328	-0.50364	9.91483e-05	0.00286131	0.376385	0.000996124	0.0164636	0.648872	Y	N	N	0.425388	0	-0.417572	0.601665	0.995233
chrX_1404671_1409402	-6.28474	-9.05663	-2.77189	0.00108193	3.2363e-05	0.218802	0.00690122	0.000391842	0.46032	Y	Y	N	0.425388	0	-0.417572	0.601665	0.995233
chr21_34717552_34721849	-0.59078	-6.39263	-5.80185	0.480052	7.85706e-06	5.28577e-05	0.661744	0.00011086	0.000833477	N	Y	N	0.662162	1.72429	0.518354	0.605205	0.995233
chr1_245222688_245246990	-6.26294	-5.5473	0	0.00253606	0.00749446	1	0.0123149	0.0321912	1	Y	Y	N	0	0.524411	0.392335	0.624885	0.995233
chr9_99324975_99327765	-6.3727	-5.65706	0	0.0021364	0.00641528	1	0.0111411	0.0296215	1	Y	Y	N	0	0.524411	0.392335	0.624885	0.995233
chr1_94360170_94367225	0.274002	-2.32998	-2.60399	0.304691	3.17225e-11	8.79587e-14	0.495779	1.30634e-09	1.04765e-11	N	Y	Y	0.192991	0.797988	0.450475	0.62738	0.995233
chr13_28830429_28835595	0.490538	-1.769	-2.25954	0.421009	0.00722609	0.000568514	0.613076	0.0316919	0.00613591	N	N	N	0.192991	0.797988	0.450475	0.62738	0.995233
chr1_32745272_32745811	0	8.48359	8.49969	1	2.51973e-09	2.35138e-09	1	7.20571e-08	1.09676e-07	N	Y	Y	1.43703	0.949704	-0.477188	0.633928	0.995233
chr2_29375551_29390406	-5.82892	-5.11328	0	0.00277416	0.00867999	1	0.0128418	0.034477	NA	Y	N	N	0.451262	0	-0.37959	0.634756	0.995233
chr5_24277273_24282795	-7.49408	-6.77844	0	2.60788e-05	0.000142565	1	0.000317928	0.00143232	1	Y	Y	N	0.451262	0	-0.37959	0.634756	0.995233
chr12_122218778_122219098	0.954587	-2.30007	-3.25466	0.20104	0.00806252	0.000156006	0.374017	0.0336019	0.00206871	N	N	Y	2.55327	2.19584	-0.415641	0.639137	0.995233
chr2_206023446_206058044	0.252562	-5.9457	-6.19826	0.756677	2.88051e-05	1.25821e-05	0.865419	0.000352378	0.000246831	N	Y	Y	0	0.65686	0.38901	0.639658	0.995233
chr3_15452752_15455669	-5.91668	-5.20104	0	0.00375709	0.0108541	1	0.014792	0.0381877	NA	Y	N	N	0	0.65686	0.38901	0.639658	0.995233
chr15_76226083_76226820	-6.98519	-1.58962	5.39558	0.000107125	0.262308	0.00328394	0.00106135	0.444907	0.0239126	Y	N	N	1.05947	0.573995	-0.458103	0.645233	0.995233
chr1_23107914_23111569	5.67679	7.75548	2.07869	0.00097118	5.59698e-06	0.100553	0.00634582	8.10704e-05	0.272528	N	Y	N	0.451262	1.123	0.45576	0.647092	0.995233
chr3_149563798_149589941	-0.35782	-1.02202	-0.664201	0.0316248	1.56118e-08	0.000274109	0.0838631	3.72317e-07	0.00333025	N	Y	N	0.920434	1.70324	0.453309	0.64798	0.995233
chr2_61406116_61413632	-6.14213	-5.42649	0	0.00333146	0.00950427	1	0.0137912	0.0358651	NA	Y	Y	N	1.70437	1.2838	-0.447678	0.648027	0.995233
chr12_64803742_64810534	-6.93539	-6.21975	0	0.000988882	0.00313881	1	0.00643182	0.0177008	1	Y	Y	N	0.524319	1.4041	0.45384	0.650912	0.995233
chr2_36623757_36669878	-0.35229	-5.95335	-5.60106	0.281282	2.16894e-11	3.15812e-10	0.469777	9.36743e-10	1.71258e-08	N	Y	Y	0.930633	0.957225	-0.45224	0.651996	0.995233
chr14_92559596_92562481	3.23797	3.05201	-0.185952	0.00660778	0.0109807	0.868186	0.0228865	0.038398	1	N	N	N	0	0.70639	0.371025	0.654286	0.995233
chr5_170597134_170610434	-0.902482	-6.06349	-5.16101	0.550924	0.0014233	0.00685006	0.717843	0.00955566	0.0407218	N	Y	N	0	0.70639	0.371025	0.654286	0.995233
chr5_78734833_78752841	1.39105	1.5213	0.130245	1.02549e-06	1.45181e-07	0.634115	1.77159e-05	2.92136e-06	0.872071	Y	Y	N	0	0.70639	0.371025	0.654286	0.995233
chr15_50940884_50955243	-1.20867	-1.39985	-0.19118	1.79524e-06	1.7846e-07	0.490721	2.92315e-05	3.50147e-06	0.758718	Y	Y	N	0.192991	0.836928	0.412538	0.655988	0.995233
chr8_124349865_124351686	0.522516	1.35041	0.827897	0.0532474	5.26791e-07	0.0016084	0.130547	9.42237e-06	0.0139742	N	Y	N	0.598163	1.50024	0.443769	0.658701	0.995233
chr19_2438161_2438529	-5.74209	1.2559	6.99799	0.0002941	0.246891	9.31763e-06	0.0024565	0.428505	0.000192411	N	N	N	0.598163	1.27464	0.440465	0.660174	0.995233
chr15_85607601_85610435	-1.59214	-1.38547	0.206669	5.04838e-07	1.98165e-05	0.539312	9.36065e-06	0.000254977	0.800092	Y	Y	N	0.76917	1.54512	0.429654	0.668774	0.995233
chr1_1737914_1756921	-5.77993	-5.06429	0	0.00448624	0.012777	1	0.0167772	0.0426482	NA	N	N	N	1.4862	2.79436	0.393906	0.669346	0.995233
chr11_66982811_66986874	0.420587	-5.24652	-5.66711	0.798113	0.00909812	0.00475788	0.891503	0.0350609	0.0310824	N	N	N	0.330335	0	-0.340494	0.669749	0.995233
chr17_28808161_28811788	1.62071	2.08898	0.468261	0.00499691	0.000320054	0.38875	0.0181867	0.00286955	0.662426	N	Y	N	0.330335	0	-0.340494	0.669749	0.995233
chr17_59924462_59938930	-5.81668	-5.10104	0	0.00491329	0.0136397	1	0.0179397	0.0449768	NA	Y	N	N	0.330335	0	-0.340494	0.669749	0.995233
chr18_8113484_8143777	-9.08199	-8.36635	0	2.59846e-12	1.14486e-10	1	1.24358e-10	4.29049e-09	1	Y	Y	N	0.330335	0	-0.340494	0.669749	0.995233
chr2_191523884_191537878	-0.0910744	0.812815	0.903889	0.695142	0.000445636	9.68534e-05	0.822947	0.00380294	0.00142923	N	N	N	0.330335	0	-0.340494	0.669749	0.995233
chr5_111570331_111602027	0.0285837	-6.5443	-6.57289	0.965633	1.09881e-06	9.81458e-07	0.993259	1.83992e-05	2.68292e-05	N	Y	Y	0.330335	0	-0.340494	0.669749	0.995233
chr5_77805607_77806221	-0.436277	1.05874	1.49502	0.0596385	3.11193e-06	7.78734e-11	0.143729	4.80213e-05	4.85435e-09	N	Y	Y	0.330335	0	-0.340494	0.669749	0.995233
chr5_78964715_78977884	-7.31069	-1.1352	6.1755	2.5444e-05	0.385673	0.000429724	0.000311261	0.574495	0.00489123	Y	N	N	0.330335	0	-0.340494	0.669749	0.995233
chr6_107824861_107827631	-8.61718	-0.494719	8.12246	2.22049e-11	0.361077	3.32192e-10	9.14405e-10	0.550604	1.78687e-08	Y	N	Y	0.330335	0	-0.340494	0.669749	0.995233
chr6_45399600_45480144	7.30462	0	-6.60508	9.27364e-05	1	0.000408553	0.000947838	1	0.00467419	Y	N	Y	0.330335	0	-0.340494	0.669749	0.995233
chr7_27668990_27672064	-1.4116	-1.26373	0.147866	1.33408e-10	1.40223e-08	0.514	4.92487e-09	3.37822e-07	0.778646	Y	Y	N	0.330335	0	-0.340494	0.669749	0.995233
chr7_90355881_90356126	-6.03962	-9.43402	-3.3944	0.00692231	0.000145929	0.179196	0.0237782	0.00145375	0.402572	Y	Y	N	0.330335	0	-0.340494	0.669749	0.995233
chr21_35475134_35475818	8.30188	7.64264	-0.659237	1.45794e-07	1.42038e-06	0.536277	2.95891e-06	2.31277e-05	0.798137	Y	Y	N	0.330335	0.930437	0.409119	0.671276	0.995233
chr9_133364720_133370410	-6.15184	-5.4362	0	0.00503154	0.0131862	1	0.0182924	0.0438075	NA	Y	Y	N	4.30733	4.90595	0.294383	0.671966	0.995233
chr22_32044087_32046764	0.106624	-3.91037	-4.017	0.893177	0.00058462	0.000407016	0.946496	0.00474326	0.00466504	N	Y	N	0.524319	0.243313	-0.364457	0.672959	0.995233
chr6_139264650_139265759	0.0157223	0.939976	0.924253	0.95838	0.00166867	0.00197019	0.989424	0.0108234	0.0162774	N	N	N	0.524319	1.33455	0.422147	0.6736	0.995233
chr8_9437003_9437893	-5.8163	-5.10066	0	0.00376762	0.0110681	1	0.0148091	0.0385317	NA	N	N	N	1.15333	1.2308	-0.415266	0.677512	0.995233
chr12_46339032_46345510	-1.60582	-6.6947	-5.08888	0.113434	1.25385e-05	0.00100617	0.243344	0.000168521	0.00970798	N	Y	N	0	0.676127	0.340667	0.677794	0.995233
chr2_143638914_143685310	-5.78375	-5.06811	0	0.00336356	0.0101827	1	0.0138211	0.0369483	NA	Y	N	N	0	0.676127	0.340667	0.677794	0.995233
chr2_219498828_219499353	-6.08593	-5.37029	0	0.00283753	0.00844282	1	0.0128744	0.0342582	NA	Y	Y	N	0	0.676127	0.340667	0.677794	0.995233
chr2_58425729_58459247	-1.33312	-0.0412239	1.29189	1.58653e-06	0.880009	4.4338e-06	2.61944e-05	0.953281	0.000101977	N	N	N	0	0.676127	0.340667	0.677794	0.995233
chr7_156549087_156619438	0.276566	-1.07115	-1.34771	0.470375	0.00686328	0.000651538	0.654013	0.0308848	0.00683295	N	N	N	0	0.676127	0.340667	0.677794	0.995233
chr19_17387304_17387718	-1.91948	-1.43767	0.481802	6.25661e-12	3.88242e-07	0.107931	2.80478e-10	7.12414e-06	0.285674	Y	Y	N	0	0.446873	0.330042	0.679747	0.995233
chr21_17135210_17150346	-6.46577	-5.75012	0	0.00184979	0.00562708	1	0.0101566	0.0270214	1	Y	Y	N	0	0.446873	0.330042	0.679747	0.995233
chr5_170319391_170351554	-1.09382	-6.25094	-5.15711	0.454514	0.00078065	0.00581255	0.641198	0.00602325	0.0359639	N	Y	N	0	0.446873	0.330042	0.679747	0.995233
chr2_98504515_98543950	1.95757	-4.54731	-6.50489	0.0835848	0.0051501	4.92777e-05	0.19063	0.0254412	0.000784445	N	N	Y	0.330335	0.900173	0.390987	0.684452	0.995233
chr3_47960209_47969840	-5.96648	-5.25083	0	0.00285889	0.00867045	1	0.0128858	0.034477	NA	Y	N	N	0.718636	0.676127	-0.395269	0.686084	0.995233
chr1_41474466_41475261	-8.52573	-0.684077	7.84166	6.83516e-12	0.11033	3.45632e-10	3.04487e-10	0.237853	1.84429e-08	Y	N	Y	1.67751	1.2838	-0.393386	0.68869	0.995233
chr11_118454524_118455359	1.98687	1.88434	-0.102526	0.00148073	0.00308383	0.861908	0.00865027	0.0175022	1	Y	N	N	1.07726	2.31007	0.387756	0.689359	0.995233
chr2_28974904_29022165	-8.8008	-4.89036	3.91044	4.71682e-10	1.30019e-06	0.0115979	1.55392e-08	2.13671e-05	0.060659	Y	Y	N	1.48074	3.48375	0.367276	0.689788	0.995233
chr7_77394812_77408131	7.14784	5.46397	-1.68387	4.69209e-05	0.00224067	0.213834	0.000530896	0.0135415	0.452067	Y	N	N	1.46242	2.16295	0.375533	0.690183	0.995233
chr14_70442432_70461197	-7.15513	-6.43948	0	0.000196023	0.000803427	1	0.0017687	0.00611901	1	Y	Y	N	0	0.51689	0.315698	0.692707	0.995233
chr20_57242546_57248767	-6.45779	0.112963	6.57075	0.000529558	0.938597	0.000439835	0.00393998	0.989393	0.00497237	Y	N	Y	0	0.51689	0.315698	0.692707	0.995233
chr4_139135739_139157605	-6.2646	-5.54896	0	0.00252174	0.00745855	1	0.0122928	0.0321277	1	Y	Y	N	0	0.51689	0.315698	0.692707	0.995233
chr11_36415396_36424928	1.41297	-5.12217	-6.53515	0.14014	0.000693385	1.25257e-05	0.287214	0.00546301	0.00024645	N	N	Y	0.524319	1.18127	0.385583	0.698126	0.995233
chr22_46096162_46114373	-2.23225	-1.47866	0.75359	1.35167e-08	0.000163526	0.0689671	3.44384e-07	0.0015998	0.208527	Y	Y	N	1.15333	2.03801	0.3737	0.699511	0.995233
chr10_72099752_72100458	-6.48195	0.177785	6.65973	1.12259e-05	0.847243	7.00859e-06	0.000150593	0.933041	0.000150313	Y	N	Y	3.5906	3.43227	-0.288541	0.703734	0.995233
chr1_213341201_213349835	-1.94976	-2.13142	-0.181666	4.05994e-05	2.00525e-05	0.72689	0.000466827	0.000257133	0.934172	Y	Y	N	0	0.404115	0.302324	0.704956	0.995233
chr20_35832288_35842268	1.77954	1.32149	-0.458057	0.000531175	0.0122757	0.359243	0.00394373	0.0414833	0.629076	Y	N	N	0	0.404115	0.302324	0.704956	0.995233
chr20_57014001_57016139	-1.93199	-3.29143	-1.35945	0.000186752	3.42288e-08	0.0266275	0.00169586	7.60873e-07	0.11004	Y	Y	N	0	0.404115	0.302324	0.704956	0.995233
chr8_142170731_142173528	0.826295	-3.93073	-4.75703	0.226475	6.66834e-05	1.24e-06	0.40621	0.000750284	3.28207e-05	N	Y	Y	0	0.404115	0.302324	0.704956	0.995233
chr8_8011709_8012052	-7.16393	-6.44829	0	0.000191503	0.000786898	1	0.00173455	0.00605182	1	Y	Y	N	0	0.404115	0.302324	0.704956	0.995233
chr9_90219869_90221143	-5.83728	-5.12164	0	0.00351017	0.0104298	1	0.0142209	0.0373398	NA	Y	N	N	0	0.404115	0.302324	0.704956	0.995233
chr9_97686268_97718297	-0.225743	-5.99447	-5.76873	0.839047	0.000190295	0.000334479	0.916842	0.0018239	0.00396265	N	Y	N	0	0.404115	0.302324	0.704956	0.995233
chr5_179976931_179980471	-1.2682	-1.13843	0.129762	1.89916e-05	0.000194832	0.68108	0.00024064	0.00185733	0.901679	Y	Y	N	0.524319	1.05242	0.371725	0.707842	0.995233
chr17_76388557_76394432	-3.21247	0.84666	4.05913	0.00905628	0.410825	0.000954493	0.0298769	0.599603	0.00926706	N	N	N	0.76917	0.573995	-0.343952	0.723345	0.995233
chr14_74203701_74204000	-6.76393	-6.04829	0	0.000983955	0.00321448	1	0.0064087	0.0179701	1	N	Y	N	0.598163	0.51689	-0.329401	0.728007	0.995233
chr8_6582391_6590171	-2.88386	-0.243045	2.64082	0.000932977	0.766765	0.00268647	0.00617019	0.876443	0.0205726	Y	N	N	0.598163	0.404115	-0.316066	0.730671	0.995233
chr7_129679304_129688984	1.56963	1.28847	-0.281165	5.07911e-05	0.00111453	0.458458	0.000564761	0.00792591	0.729116	Y	N	N	0.618379	1.05337	0.337812	0.734694	0.995233
chr5_72157635_72173173	-6.56663	-5.85099	0	0.00152235	0.00472991	1	0.00883834	0.0239299	1	Y	Y	N	0.524319	1.2838	0.337246	0.73595	0.995233
chr17_28808161_28819771	-0.847978	-5.96953	-5.12155	0.585476	0.00201994	0.00832744	0.744244	0.0124917	0.0470313	N	Y	N	1.37307	1.06097	-0.323394	0.747362	0.995233
chr14_50941795_50952912	-1.93347	-2.78156	-0.848091	0.00412547	0.000180414	0.268869	0.0157016	0.00174335	0.521627	Y	Y	N	0.330335	0.949704	0.308717	0.74951	0.995233
chr19_11223954_11224438	1.2678	1.61436	0.346555	0.0111813	0.00137588	0.470565	0.0361137	0.00931705	0.740952	N	N	N	0.330335	0.797988	0.299919	0.751259	0.995233
chr8_48308936_48320523	-1.51877	-7.59963	-6.08085	0.0393236	3.42677e-08	1.13396e-05	0.100734	7.60873e-07	0.000227817	N	Y	Y	0.330335	0.797988	0.299919	0.751259	0.995233
chr11_44129233_44151688	7.18971	6.35648	-0.833229	2.92396e-06	4.2796e-05	0.416414	4.53237e-05	0.000502694	0.690572	Y	Y	N	0.662162	1.45485	0.315203	0.753732	0.995233
chr2_234296903_234307095	3.52174	2.65873	-0.863014	9.91047e-06	0.00107345	0.232803	0.000134992	0.00768784	0.477301	Y	N	N	0.695314	0.404115	-0.288314	0.75876	0.995233
chrX_44894176_44913200	-6.42317	-5.70752	0	0.00206918	0.00620127	1	0.0108967	0.0289542	1	Y	Y	N	0.437042	0.243313	-0.252619	0.760138	0.995233
chr16_69404386_69406258	0.369749	2.41774	2.04799	0.0673793	7.9467e-36	2.27948e-27	0.159401	2.81432e-33	1.08601e-24	N	Y	Y	0.588607	1.123	0.305231	0.760211	0.995233
chr12_28457559_28544344	-6.34532	-5.62968	0	0.00257498	0.00748593	1	0.0124241	0.0321752	1	Y	Y	N	0.654437	0	-0.247408	0.764474	0.995233
chr12_28408514_28412375	-8.37385	-7.6582	0	1.31385e-08	2.00939e-07	1	3.40584e-07	3.91002e-06	1	Y	Y	N	0.192991	0.524411	0.252567	0.767116	0.995233
chr8_52773405_52773806	-1.28048	-0.0277354	1.25274	3.35498e-12	0.875309	4.29092e-11	1.56338e-10	0.949762	2.86205e-09	Y	N	Y	0.192991	0.524411	0.252567	0.767116	0.995233
chr6_5404775_5431405	-1.44142	-1.10224	0.339179	4.82638e-05	0.00207672	0.352591	0.000543485	0.0127686	0.62152	Y	N	N	0.451262	0.797988	0.280527	0.772651	0.995233
chr5_21491430_21501935	-2.33175	-2.59499	-0.263235	0.00105713	0.000384605	0.72424	0.00678845	0.00335901	0.931669	Y	N	N	1.02355	0.797988	-0.287797	0.774056	0.995233
chr10_126185530_126205840	-7.07546	-1.18144	5.89402	6.55565e-06	0.276863	0.000216939	9.4186e-05	0.460863	0.0027405	Y	N	N	0.588607	1.11051	0.286645	0.774293	0.995233
chr1_178745817_178754742	-1.11644	-6.17325	-5.05681	0.454634	0.00104771	0.00756732	0.641214	0.00758008	0.0437126	N	Y	N	0.330335	0.836928	0.266018	0.778138	0.995233
chr11_11348633_11362551	5.8181	6.74323	0.92513	0.0135539	0.00418611	0.652583	0.0425167	0.0219631	0.884203	N	N	N	0.330335	0.836928	0.266018	0.778138	0.995233
chr1_32381496_32385259	-1.03711	-1.58784	-0.550736	0.000853165	1.0375e-06	0.0951869	0.00578275	1.75385e-05	0.262571	Y	Y	N	0.258272	0	-0.224361	0.778305	0.995233
chr10_71977568_71978573	-5.37769	1.5472	6.92489	0.00418576	0.295747	0.000207874	0.0158884	0.481894	0.00265617	N	N	Y	0.258272	0	-0.224361	0.778305	0.995233
chr16_29332249_29339945	0	7.12511	7.14122	1	0.000517315	0.000502434	1	0.00430569	0.00555761	N	Y	Y	0.258272	0	-0.224361	0.778305	0.995233
chr17_42231924_42232779	0.796054	0.00590817	-0.790146	0.00153758	0.98249	0.00256379	0.00889668	1	0.0198151	N	N	N	0.258272	0	-0.224361	0.778305	0.995233
chr6_52935855_52941341	-5.96839	-5.25275	0	0.00300747	0.00902206	1	0.0131574	0.0349007	NA	Y	N	N	0.258272	0	-0.224361	0.778305	0.995233
chr6_64088931_64092461	-5.87776	-5.16212	0	0.00285023	0.00878787	1	0.0128751	0.0345983	NA	Y	N	N	0.258272	0	-0.224361	0.778305	0.995233
chr2_44436349_44445676	-0.230447	-1.89218	-1.66174	0.504269	2.09971e-06	3.34607e-05	0.683555	3.34208e-05	0.000562173	N	Y	Y	0.437042	0.273577	-0.234233	0.77952	0.995233
chr6_168944305_168999684	0	6.4573	6.4734	1	0.00210318	0.00204984	1	0.0129089	0.016735	N	Y	N	0.192991	0.70639	0.25012	0.780449	0.995233
chr9_20758089_20778767	-6.00304	-5.28739	0	0.00268842	0.00820557	1	0.0126502	0.0337954	NA	Y	N	N	0.192991	0.70639	0.25012	0.780449	0.995233
chr16_74491772_74493687	0.905071	2.39872	1.49364	0.0943842	6.22969e-06	0.00330473	0.209916	8.96848e-05	0.0240377	N	Y	Y	2.02882	2.37029	-0.249992	0.780876	0.995233
chr21_35475134_35497780	3.35092	3.52058	0.169651	2.73118e-20	6.70409e-22	0.572303	3.12015e-18	8.04832e-20	0.826795	Y	Y	N	1.3273	1.4041	-0.266845	0.787064	0.995233
chr1_1986880_1991030	5.98757	7.20886	1.2213	0.00099655	7.08558e-05	0.383378	0.00645797	0.000789107	0.656467	N	Y	N	0.192991	0	-0.213771	0.788477	0.995233
chr1_47753223_47761520	0.407329	-5.57769	-5.98502	0.659962	0.000174494	5.3747e-05	0.796147	0.00170005	0.000845501	N	N	N	0.192991	0	-0.213771	0.788477	0.995233
chr1_61743192_61824946	-5.57734	-8.07984	-2.50251	5.00614e-08	1.41136e-08	0.108113	1.11856e-06	3.38869e-07	0.285929	Y	Y	N	0.192991	0	-0.213771	0.788477	0.995233
chr10_114799784_114849299	-6.04232	-5.32668	0	0.00265081	0.00805878	1	0.0125899	0.0336019	NA	Y	Y	N	0.192991	0	-0.213771	0.788477	0.995233
chr10_126176991_126186697	-5.88867	-0.930587	4.95808	9.92098e-11	0.110645	7.19317e-08	3.7984e-09	0.238203	2.63618e-06	Y	N	Y	0.192991	0	-0.213771	0.788477	0.995233
chr10_89685270_89712016	-8.42282	-7.70717	0	2.1682e-09	4.34582e-08	1	6.56296e-08	9.50045e-07	1	Y	Y	N	0.192991	0	-0.213771	0.788477	0.995233
chr10_93902786_93940776	-3.63042	-2.95014	0.68028	5.40051e-07	4.77221e-05	0.3742	9.85872e-06	0.000555947	0.64661	Y	N	N	0.192991	0	-0.213771	0.788477	0.995233
chr11_103187274_103194718	-7.72002	-5.13359	2.58643	1.61252e-06	0.000593199	0.173031	2.65616e-05	0.00479638	0.393506	Y	Y	N	0.192991	0	-0.213771	0.788477	0.995233
chr11_36248635_36248980	-1.26434	-1.25012	0.0142258	3.8763e-05	9.40956e-05	0.965778	0.000448067	0.00101135	1	Y	Y	N	0.192991	0	-0.213771	0.788477	0.995233
chr11_63960550_63962092	4.4877	4.48771	5.15351e-06	0.00437659	0.00453606	0.999997	0.0164319	0.0232481	1	N	N	N	0.192991	0	-0.213771	0.788477	0.995233
chr12_20790034_20803534	-5.97136	-5.25572	0	0.00352513	0.0102254	1	0.0142505	0.0370384	NA	Y	N	N	0.192991	0	-0.213771	0.788477	0.995233
chr12_60098553_60098799	-6.12207	-5.40642	0	0.00366362	0.0102852	1	0.0145701	0.0371237	NA	Y	Y	N	0.192991	0	-0.213771	0.788477	0.995233
chr13_113669077_113679072	0	6.86805	6.88416	1	0.000868937	0.00084494	1	0.00649913	0.00834926	N	Y	Y	0.192991	0	-0.213771	0.788477	0.995233
chr13_114806476_114839312	1.22061	1.40453	0.183923	0.000212485	2.6578e-05	0.564915	0.001886	0.000329431	0.820376	Y	Y	N	0.192991	0	-0.213771	0.788477	0.995233
chr13_83637349_83676411	-6.70391	-5.98826	0	0.00107978	0.00350124	1	0.00689641	0.0192691	1	Y	Y	N	0.192991	0	-0.213771	0.788477	0.995233
chr14_62187097_62188541	-6.07117	-5.35552	0	0.0032712	0.00947681	1	0.0136834	0.0358187	NA	Y	Y	N	0.192991	0	-0.213771	0.788477	0.995233
chr15_80412670_80415142	-1.42101	-1.37945	0.0415634	4.14647e-14	6.71538e-13	0.832089	2.44745e-12	3.54963e-11	0.991963	Y	Y	N	0.192991	0	-0.213771	0.788477	0.995233
chr15_93428745_93435302	-7.57207	-2.51845	5.05362	1.53374e-05	0.065226	0.00494751	0.000198239	0.157815	0.0319767	Y	N	N	0.192991	0	-0.213771	0.788477	0.995233
chr17_11958206_11984847	-6.66712	-5.95148	0	0.00147084	0.00452556	1	0.00862416	0.0232202	1	Y	Y	N	0.192991	0	-0.213771	0.788477	0.995233
chr17_28934570_28937960	-1.73299	-2.53338	-0.800393	6.03664e-11	7.70474e-17	0.0116572	2.37542e-09	6.42032e-15	0.0606976	Y	Y	N	0.192991	0	-0.213771	0.788477	0.995233
chr21_33825620_33840156	0.392974	-6.02655	-6.41953	0.673102	5.40856e-05	1.64031e-05	0.806078	0.000621897	0.000306468	N	Y	Y	0.192991	0	-0.213771	0.788477	0.995233
chr3_111632166_111639266	-0.191787	-9.13867	-8.94689	0.467617	3.3926e-14	1.15474e-13	0.652123	2.05181e-12	1.30544e-11	N	Y	Y	0.192991	0	-0.213771	0.788477	0.995233
chr3_179418796_179426745	-5.95495	-5.2393	0	0.00313286	0.0093402	1	0.0134485	0.0355256	NA	Y	N	N	0.192991	0	-0.213771	0.788477	0.995233
chr3_61975299_61989171	-8.20332	-7.48767	0	3.9505e-08	5.33527e-07	1	9.04623e-07	9.49491e-06	1	Y	Y	N	0.192991	0	-0.213771	0.788477	0.995233
chr4_1902353_1906105	1.26593	1.79449	0.528561	0.0012652	5.20889e-06	0.165839	0.0077393	7.62284e-05	0.384079	Y	Y	N	0.192991	0	-0.213771	0.788477	0.995233
chr6_147527107_147560406	-7.42616	-6.71051	0	3.76393e-05	0.000195834	1	0.000439061	0.00186437	1	Y	Y	N	0.192991	0	-0.213771	0.788477	0.995233
chr6_7861684_7862731	-6.90737	-6.19173	0	0.000744288	0.00250043	1	0.00519901	0.0147834	1	Y	Y	N	0.192991	0	-0.213771	0.788477	0.995233
chr7_102039995_102047945	0.0742048	-1.38953	-1.46374	0.872811	0.00684837	0.00432698	0.937511	0.0308848	0.0290313	N	N	N	0.192991	0	-0.213771	0.788477	0.995233
chr9_134381501_134381840	3.911	3.13444	-0.776567	0.00221888	0.015451	0.5045	0.0114634	0.0495649	0.771969	Y	N	N	0.192991	0	-0.213771	0.788477	0.995233
chr1_44750507_44785416	-1.4115	-1.27602	0.135472	0.00327637	0.00918138	0.787198	0.0136834	0.0351903	0.970179	Y	N	N	1.94089	2.69372	0.226739	0.797648	0.995233
chr7_143884054_144074283	6.13325	7.26095	1.1277	4.90544e-05	1.4308e-06	0.243358	0.000549766	2.32439e-05	0.48921	Y	Y	N	0.437042	0.432813	-0.224094	0.798615	0.995233
chr11_66583524_66595835	-0.703408	-4.54068	-3.83727	0.412778	0.00012168	0.00121847	0.604072	0.00124907	0.0112407	N	Y	N	1.25345	1.28804	0.2531	0.799063	0.995233
chr1_193044950_193046180	-6.34485	-0.755492	5.58936	0.00104837	0.632059	0.00429	0.00674441	0.781755	0.0289793	Y	N	N	0.192991	0.676127	0.222667	0.802837	0.995233
chr20_34446224_34459751	-6.58552	-5.86987	0	0.00184334	0.00550424	1	0.0101448	0.0266301	1	N	Y	N	0.192991	0.676127	0.222667	0.802837	0.995233
chr22_46829290_46835308	-1.20079	-3.9076	-2.70681	0.109987	3.05316e-05	0.00425212	0.23773	0.000371573	0.0288228	N	Y	N	0.192991	0.676127	0.222667	0.802837	0.995233
chr6_161443042_161455481	-2.11528	-1.97469	0.140592	7.2171e-14	8.34456e-12	0.637935	4.0895e-12	3.8132e-10	0.874946	Y	Y	N	0.192991	0.676127	0.222667	0.802837	0.995233
chr5_79974746_80040434	-1.67545	-1.8739	-0.198451	0.000168527	6.22269e-05	0.682288	0.0015492	0.000705206	0.901986	Y	Y	N	0.662162	0.690187	-0.242582	0.803629	0.995233
chr10_105106995_105108756	-5.91911	-0.523093	5.39602	0.00231254	0.742436	0.00601157	0.011735	0.860667	0.0367022	Y	N	N	0.451262	0.243313	-0.207309	0.805451	0.995233
chr6_30856465_30857207	3.84235	-0.860594	-4.70294	0.000548599	0.501181	0.000127885	0.00403212	0.6794	0.00176239	Y	N	Y	0.856647	1.78721	0.244436	0.806162	0.995233
chr14_67431908_67525503	1.37097	-0.865721	-2.23669	0.000114592	0.0429521	5.47974e-08	0.00111645	0.113764	2.05336e-06	Y	N	Y	0.598163	0.676127	-0.221597	0.81783	0.995233
chr2_64083440_64085070	0.748697	-0.10907	-0.857767	5.97653e-07	0.49459	4.08717e-08	1.07169e-05	0.673818	1.55779e-06	N	N	N	1.70392	3.58985	0.226107	0.819309	0.995233
chr3_33853564_33863574	-5.97327	-5.25763	0	0.00358867	0.0103677	1	0.0143689	0.0373144	NA	Y	N	N	1.17876	1.27464	0.227053	0.820881	0.995233
chr13_114164553_114188555	-6.81486	-6.09922	0	0.000991321	0.00320691	1	0.00643586	0.017942	1	N	N	N	1.21133	0.769281	-0.213989	0.831226	0.995233
chr9_88211277_88248289	0.639604	-4.30551	-4.94511	0.135299	2.06515e-08	1.01202e-10	0.279884	4.84352e-07	6.02637e-09	N	Y	Y	0.437042	0.850989	0.195549	0.839209	0.995233
chr17_79660684_79661883	3.84212	3.93265	0.0905366	7.05704e-69	1.14981e-70	0.562669	5.55389e-66	1.35735e-67	0.818539	Y	Y	N	1.44924	1.72846	-0.195116	0.840393	0.995233
chr5_170667932_170669824	-1.67831	-3.0062	-1.3279	0.00654401	8.61582e-06	0.0535414	0.0226767	0.00012013	0.175922	Y	Y	N	0.524319	0.446873	-0.182556	0.840502	0.995233
chr1_116576379_116580009	-6.15628	-5.44064	0	0.00329767	0.00940577	1	0.0137235	0.0356828	NA	Y	Y	N	0	0.273577	0.157357	0.843372	0.995233
chr1_12638746_12639440	-0.0626267	-3.01161	-2.94898	0.692176	8.45471e-37	2.65544e-35	0.821082	3.32693e-34	1.77118e-32	N	Y	Y	0	0.273577	0.157357	0.843372	0.995233
chr1_185183639_185200840	-6.28955	-5.57391	0	0.00340183	0.00944188	1	0.0139037	0.0357439	1	Y	N	N	0	0.432813	0.157357	0.843372	0.995233
chr1_225270251_225284941	-6.12951	-0.729711	5.3998	0.00159878	0.646463	0.00601432	0.00913236	0.793982	0.0367022	Y	N	N	0	0.273577	0.157357	0.843372	0.995233
chr1_61553821_61743257	-6.55395	-5.83831	0	0.00237707	0.00679398	1	0.011941	0.0307487	1	Y	Y	N	0	0.243313	0.157357	0.843372	0.995233
chr1_61798184_61824946	-7.08797	-6.37232	0	0.000282816	0.00109855	1	0.00238191	0.00783763	1	Y	Y	N	0	0.432813	0.157357	0.843372	0.995233
chr10_4872867_4889491	0	7.19064	7.20674	1	0.000216	0.000209071	1	0.00203177	0.00266635	N	Y	N	0	0.432813	0.157357	0.843372	0.995233
chr10_4872867_4950612	6.68203	5.57301	-1.10902	0.000311466	0.00300184	0.452133	0.00257122	0.017133	0.72304	Y	N	N	0	0.432813	0.157357	0.843372	0.995233
chr10_7318854_7327916	-11.9119	-11.1963	0	1.39366e-23	5.07898e-21	1	1.93555e-21	5.71023e-19	1	Y	Y	N	0	0.243313	0.157357	0.843372	0.995233
chr10_76074425_76158337	-2.09321	-0.372456	1.72076	0.000220604	0.498406	0.00276553	0.00194345	0.676974	0.0209853	Y	N	N	0	0.273577	0.157357	0.843372	0.995233
chr10_94653106_94659401	-1.69783	-1.86069	-0.16286	1.61139e-14	1.17244e-15	0.499632	1.01004e-12	8.14155e-14	0.766455	Y	Y	N	0	0.243313	0.157357	0.843372	0.995233
chr11_108098322_108106561	3.61731	4.79465	1.17734	0.000186474	6.74637e-07	0.155555	0.0016955	1.17987e-05	0.367795	N	Y	N	0	0.432813	0.157357	0.843372	0.995233
chr12_118456877_118460164	-5.78215	-5.0665	0	0.00297957	0.00926095	1	0.0130839	0.0353647	NA	Y	N	N	0	0.432813	0.157357	0.843372	0.995233
chr12_50821545_50822873	0.424395	1.21937	0.794979	0.0797921	4.3648e-07	0.000731808	0.184094	7.94752e-06	0.0075443	N	Y	N	0	0.243313	0.157357	0.843372	0.995233
chr12_514677_527802	-6.3074	-5.59176	0	0.00238534	0.00708377	1	0.0119648	0.0313235	1	Y	Y	N	0	0.243313	0.157357	0.843372	0.995233
chr12_70149164_70150443	4.22899	4.13526	-0.093731	3.54542e-05	5.80486e-05	0.914968	0.000416455	0.000662091	1	N	Y	N	0	0.273577	0.157357	0.843372	0.995233
chr12_82780582_82796909	-6.31271	-5.59707	0	0.00324366	0.00905573	1	0.0136107	0.0349737	1	Y	Y	N	0	0.243313	0.157357	0.843372	0.995233
chr13_36857606_36869994	-5.82737	-5.11173	0	0.00279571	0.00873547	1	0.0128554	0.0345362	NA	Y	N	N	0	0.243313	0.157357	0.843372	0.995233
chr14_103865288_103894777	-1.0395	-3.141	-2.1015	0.0908215	1.01919e-05	0.00348422	0.203895	0.000139902	0.024989	N	Y	N	0	0.273577	0.157357	0.843372	0.995233
chr14_70477471_70490164	-5.88182	-5.16618	0	0.00319624	0.00961164	1	0.0135221	0.035966	NA	Y	N	N	0	0.243313	0.157357	0.843372	0.995233
chr15_49528048_49531564	-0.587982	0.0681663	0.656148	9.16763e-05	0.651016	1.95953e-05	0.000938357	0.797224	0.000357107	N	N	N	0	0.273577	0.157357	0.843372	0.995233
chr15_71534988_71549054	-6.57564	-5.85999	0	0.00141207	0.00444448	1	0.00837661	0.0229783	1	Y	Y	N	0	0.243313	0.157357	0.843372	0.995233
chr15_93540187_93541851	-6.01451	-1.23647	4.77804	6.20741e-07	0.0689704	9.71025e-05	1.1047e-05	0.165151	0.00142974	N	N	N	0	0.273577	0.157357	0.843372	0.995233
chr16_31733947_31734674	1.18499	0.158125	-1.02687	6.79454e-08	0.499014	5.57515e-06	1.47625e-06	0.677482	0.000125705	Y	N	Y	0	0.273577	0.157357	0.843372	0.995233
chr17_11958206_12032604	4.23227	4.3374	0.105128	0.000538216	0.000415974	0.916632	0.00398347	0.00358872	1	Y	Y	N	0	0.273577	0.157357	0.843372	0.995233
chr17_73038276_73038754	1.00944	-3.78823	-4.79768	0.186271	0.00271295	0.000130385	0.354967	0.0157507	0.00178758	N	N	Y	0	0.273577	0.157357	0.843372	0.995233
chr17_9559720_9570068	-5.79303	-5.07739	0	0.00375375	0.0110813	1	0.014792	0.0385317	NA	Y	N	N	0	0.273577	0.157357	0.843372	0.995233
chr18_19395577_19399607	-6.74462	-6.02898	0	0.00109756	0.00352407	1	0.00696594	0.0193496	1	Y	Y	N	0	0.432813	0.157357	0.843372	0.995233
chr18_9931807_9950565	-1.12812	-4.00726	-2.87914	0.163503	4.85263e-05	0.00377949	0.323218	0.000563462	0.026536	N	Y	N	0	0.432813	0.157357	0.843372	0.995233
chr19_37690302_37698156	-8.45979	-7.74414	0	1.48452e-09	3.11973e-08	1	4.59164e-08	7.03727e-07	1	Y	Y	N	0	0.243313	0.157357	0.843372	0.995233
chr2_135694411_135700244	-7.08057	-1.6815	5.39908	6.48631e-05	0.222688	0.00279092	0.000698214	0.397504	0.0211059	Y	N	N	0	0.243313	0.157357	0.843372	0.995233
chr2_179400459_179407088	7.0708	5.66572	-1.40508	0.00196072	0.0139297	0.479514	0.0105263	0.0456144	0.750341	N	N	N	0	0.243313	0.157357	0.843372	0.995233
chr2_191765290_191789319	1.36109	1.58139	0.220299	0.000671955	0.000100791	0.563004	0.004769	0.00107193	0.81867	Y	N	N	0	0.243313	0.157357	0.843372	0.995233
chr2_240078348_240085619	-0.232088	3.00449	3.23658	0.75326	2.71591e-05	6.9213e-06	0.862905	0.00033572	0.000149298	N	Y	N	0	0.243313	0.157357	0.843372	0.995233
chr2_240944627_240946787	-5.83484	0.551981	6.38682	0.00379097	0.739175	0.0015449	0.0148759	0.858522	0.0135764	N	N	N	0	0.432813	0.157357	0.843372	0.995233
chr20_44444180_44444552	2.21021	0.314525	-1.89568	3.71434e-05	0.592376	0.000578179	0.000434136	0.751339	0.00620221	Y	N	Y	0	0.432813	0.157357	0.843372	0.995233
chr21_45499445_45500008	3.51378	2.09139	-1.42239	8.49773e-06	0.0104273	0.0508684	0.000117557	0.0373398	0.170842	Y	N	N	0	0.243313	0.157357	0.843372	0.995233
chr22_29439287_29442871	6.41213	6.1908	-0.221324	0.00713995	0.00964513	0.915753	0.0243722	0.0360319	1	N	Y	N	0	0.243313	0.157357	0.843372	0.995233
chr22_41277774_41278181	1.24665	0.982795	-0.263852	4.18828e-07	0.000126108	0.275254	7.91082e-06	0.00128706	0.53062	Y	N	N	0	0.243313	0.157357	0.843372	0.995233
chr22_50191453_50198008	-5.37792	1.78186	7.15978	0.00358101	0.214917	9.38965e-05	0.0143463	0.388629	0.00139485	N	N	Y	0	0.243313	0.157357	0.843372	0.995233
chr3_141087463_141122873	1.84179	1.79783	-0.0439621	0.00320099	0.00473445	0.940698	0.0135221	0.0239358	1	N	N	N	0	0.273577	0.157357	0.843372	0.995233
chr3_183368084_183369064	0.113352	-5.69584	-5.80919	0.943834	0.00408813	0.00339164	0.979657	0.0215288	0.0243862	N	Y	N	0	0.432813	0.157357	0.843372	0.995233
chr4_110580167_110585550	-0.521108	-4.94812	-4.42702	0.449519	3.75586e-06	3.6755e-05	0.638321	5.67222e-05	0.000611361	N	Y	Y	0	0.243313	0.157357	0.843372	0.995233
chr4_30921775_30924205	-6.41275	-5.69711	0	0.00249064	0.00721068	1	0.0122147	0.0316462	1	Y	Y	N	0	0.432813	0.157357	0.843372	0.995233
chr4_39077585_39088347	-0.380959	-6.88306	-6.5021	0.557982	2.58036e-07	1.18055e-06	0.723578	4.89991e-06	3.18796e-05	N	Y	Y	0	0.243313	0.157357	0.843372	0.995233
chr5_142434004_142437312	0.423125	1.51709	1.09396	0.172875	8.8935e-07	0.000350285	0.336302	1.52156e-05	0.00409895	N	Y	Y	0	0.273577	0.157357	0.843372	0.995233
chr5_31448654_31451747	-1.63637	0.0386279	1.675	0.00020809	0.928516	0.000168552	0.00185397	0.983503	0.00220008	Y	N	N	0	0.243313	0.157357	0.843372	0.995233
chr5_36953720_36962376	-6.09569	-5.38005	0	0.00328416	0.00946817	1	0.0136834	0.0358187	NA	Y	Y	N	0	0.243313	0.157357	0.843372	0.995233
chr5_80419461_80422982	-7.71971	-2.22745	5.49226	2.70064e-06	0.0649531	0.00108669	4.22266e-05	0.157286	0.0102958	Y	N	N	0	0.243313	0.157357	0.843372	0.995233
chr6_160819011_160831878	-10.3386	-0.411188	9.92742	9.2155e-18	0.119091	1.83683e-16	8.58861e-16	0.252099	2.91707e-14	Y	N	Y	0	0.243313	0.157357	0.843372	0.995233
chr6_74149932_74150168	-6.39666	-5.68102	0	0.00209416	0.00628849	1	0.0109955	0.0292266	1	Y	Y	N	0	0.243313	0.157357	0.843372	0.995233
chr7_103777228_103805730	0.50834	-6.51037	-7.01871	0.423852	1.01764e-06	1.282e-07	0.615825	1.72438e-05	4.40772e-06	N	Y	Y	0	0.243313	0.157357	0.843372	0.995233
chr7_64004085_64004810	1.19192	1.85234	0.660413	0.000107956	1.8368e-09	0.0265157	0.0010635	5.39837e-08	0.109746	Y	Y	N	0	0.243313	0.157357	0.843372	0.995233
chr8_100286426_100287482	-1.96334	-2.08881	-0.125467	9.52569e-09	4.64674e-09	0.734184	2.5557e-07	1.21003e-07	0.938304	Y	Y	N	0	0.243313	0.157357	0.843372	0.995233
chr8_129001408_129022690	1.52798	-3.19665	-4.72463	0.0226733	0.00053724	2.32205e-07	0.0661428	0.00443505	7.41056e-06	Y	N	Y	0	0.432813	0.157357	0.843372	0.995233
chr8_15588175_15605974	-5.87208	-5.15644	0	0.00454977	0.0127203	1	0.0169789	0.042539	NA	Y	N	N	0	0.273577	0.157357	0.843372	0.995233
chr9_33036572_33037113	3.93626	3.17357	-0.762685	0.00034197	0.00442192	0.436084	0.00278731	0.0228951	0.70857	N	N	N	0	0.432813	0.157357	0.843372	0.995233
chr10_11789348_11797607	-7.01523	-6.29958	0	0.000405689	0.00149526	1	0.00318923	0.00990733	1	Y	Y	N	0.192991	0.446873	0.158817	0.845786	0.995233
chr18_12951854_12971250	5.82412	6.52435	0.700232	0.0160909	0.00701584	0.742283	0.0494454	0.0311556	0.944051	N	N	N	0.330335	0.690187	0.180071	0.845845	0.995233
chr9_96233423_96238620	-1.04349	-0.14516	0.898331	6.50633e-09	0.417445	8.3877e-07	1.81434e-07	0.606018	2.32141e-05	Y	N	N	1.86352	2.58386	0.179273	0.847555	0.995233
chr5_87581561_87588460	-6.53437	-5.81873	0	0.00249853	0.00709431	1	0.0122217	0.0313345	1	Y	Y	N	0.618379	0.446873	-0.177167	0.849607	0.995233
chr12_27824364_27827154	1.70228	-4.80646	-6.50873	0.110555	0.00236838	3.11934e-05	0.238739	0.0141206	0.000527192	N	N	Y	0.588607	0.404115	-0.174078	0.849789	0.995233
chr3_183361268_183369064	-0.111234	-3.21386	-3.10262	0.790787	1.4907e-09	5.52223e-09	0.886538	4.43639e-08	2.47203e-07	N	Y	Y	0.598163	1.05337	0.183617	0.852994	0.995233
chr10_4872867_4884696	7.86449	9.34479	1.4803	0.000410954	2.66037e-05	0.433821	0.00321971	0.000329431	0.706098	N	Y	N	0.330335	0.243313	-0.145737	0.855711	0.995233
chr16_19234367_19236160	-9.21724	-8.50159	0	1.11342e-12	5.2655e-11	1	5.59314e-11	2.09526e-09	1	Y	Y	N	0.330335	0.243313	-0.145737	0.855711	0.995233
chr16_68934337_68961986	-7.53095	-6.81531	0	3.70816e-05	0.000189237	1	0.000434131	0.00182126	1	Y	Y	N	0.330335	0.243313	-0.145737	0.855711	0.995233
chr17_26685939_26687594	-5.78916	-5.07352	0	0.00353293	0.0105731	1	0.0142505	0.0376197	NA	Y	N	N	0.330335	0.243313	-0.145737	0.855711	0.995233
chr2_9985349_9994550	-6.40313	-5.68749	0	0.00281505	0.0079691	1	0.0128554	0.0333797	1	Y	Y	N	0.330335	0.243313	-0.145737	0.855711	0.995233
chr3_149563798_149613357	-0.142805	-5.59546	-5.45266	0.896315	0.000441765	0.000623754	0.947825	0.00377445	0.00656957	N	Y	N	0.330335	0.243313	-0.145737	0.855711	0.995233
chr5_95099212_95124562	-4.12571	-3.97192	0.15379	0.00638418	0.0100672	0.923552	0.0222645	0.0366801	1	N	Y	N	0.330335	0.243313	-0.145737	0.855711	0.995233
chr9_130230019_130236210	-5.83992	-5.12427	0	0.0038351	0.0111777	1	0.0149466	0.0388098	NA	Y	N	N	0.330335	0.243313	-0.145737	0.855711	0.995233
chrX_134679348_134690225	6.95803	0	-6.2585	0.00102422	1	0.00314059	0.00661913	1	0.0231908	Y	N	Y	0.330335	0.243313	-0.145737	0.855711	0.995233
chr2_88482218_88482592	1.06271	-5.65523	-6.71794	0.169489	5.45381e-05	1.41121e-06	0.331444	0.000626084	3.69128e-05	N	Y	Y	0.949707	1.4041	0.176744	0.859905	0.995233
chr9_114341076_114348445	-8.29846	-7.58282	0	1.6209e-08	2.45431e-07	1	4.04255e-07	4.67308e-06	1	Y	Y	N	1.48675	1.75904	0.155886	0.871772	0.995233
chr12_113758136_113759153	-6.37451	-5.65887	0	0.00245765	0.0071772	1	0.0121816	0.0316078	1	Y	Y	N	0.662162	0.65686	-0.149305	0.876767	0.995233
chr3_172003716_172028671	-6.04362	-5.32798	0	0.00330966	0.00960922	1	0.0137492	0.035966	NA	Y	N	N	0.330335	0.432813	-0.13101	0.877001	0.995233
chr4_151719233_151738409	-0.253097	-1.18695	-0.933855	0.334908	2.25412e-05	0.000900336	0.529735	0.000286128	0.00881827	N	Y	N	0.330335	0.432813	-0.13101	0.877001	0.995233
chr1_247318868_247323115	-0.904768	0.102235	1.007	1.14597e-17	0.330401	3.91252e-21	1.04063e-15	0.519809	8.41823e-19	N	N	N	0.755723	0.971285	0.154224	0.877409	0.995233
chr14_50074118_50074839	-6.33744	-5.6218	0	0.00216727	0.00652736	1	0.0112673	0.0300021	1	Y	Y	N	0.192991	0.404115	0.123077	0.878155	0.995233
chrX_149962164_149984551	1.18005	-5.0739	-6.25395	0.263409	0.00124683	6.06427e-05	0.452188	0.00865815	0.000942859	N	N	Y	0.192991	0.404115	0.123077	0.878155	0.995233
chr17_76388557_76400170	0	6.45477	6.47087	1	0.00220652	0.00215102	1	0.0133977	0.0173486	N	Y	N	0.330335	0.273577	-0.121722	0.879417	0.995233
chr7_99952766_99953427	1.17498	0.0498548	-1.12512	0.00134653	0.894391	0.00242986	0.00808947	0.962762	0.0190987	Y	N	N	0.330335	0.273577	-0.121722	0.879417	0.995233
chr14_62188227_62188541	-1.09443	-1.26432	-0.169892	0.00812305	0.00288298	0.69337	0.0271938	0.0165748	0.91021	N	Y	N	0.524319	0.900173	0.148189	0.879597	0.995233
chr6_5771524_5775549	-6.12907	-5.41342	0	0.00276338	0.0082067	1	0.0128118	0.0337954	NA	Y	Y	N	1.57128	2.03491	-0.141997	0.880236	0.995233
chrX_147013944_147014282	0.86532	-5.17613	-6.04145	0.585243	0.0084808	0.00204197	0.744244	0.0342592	0.0167116	N	N	Y	0.437042	0.620557	0.13834	0.881676	0.995233
chr4_129919029_129925031	0.213037	-5.60799	-5.82103	0.834062	0.000278649	0.000158134	0.913368	0.00254339	0.00208862	N	Y	N	0.330335	0.524411	0.124889	0.887565	0.995233
chr9_6420912_6421142	-5.82501	1.38133	7.20633	0.000166627	0.177273	2.83359e-06	0.00153675	0.339083	6.75001e-05	Y	N	Y	0.330335	0.524411	0.124889	0.887565	0.995233
chr1_25124233_25153607	-5.99174	-5.2761	0	0.00385006	0.010928	1	0.0149753	0.0383373	NA	Y	N	N	0.695314	0.957225	0.133026	0.893611	0.995233
chr20_30954187_30956926	-1.04434	-1.32347	-0.279122	9.90846e-17	5.67225e-25	0.0311352	8.16065e-15	9.13103e-23	0.123852	Y	Y	N	0.258272	0.446873	0.111786	0.893622	0.995233
chr10_104809464_104816721	-5.86087	-5.14523	0	0.00344234	0.0102282	1	0.0140141	0.0370384	NA	Y	N	N	0.524319	0.676127	-0.123189	0.896903	0.995233
chr3_149563798_149570383	-0.390999	-5.87741	-5.48642	0.798534	0.00219389	0.00431298	0.891503	0.0133385	0.0289996	N	Y	N	0.662162	1.2838	0.126315	0.89981	0.995233
chr14_31792771_31795548	-5.92847	-5.21283	0	0.00356168	0.0103846	1	0.0142931	0.0373398	NA	Y	N	N	0.330335	0.70639	0.114688	0.900995	0.995233
chr3_127980971_127983624	-0.985594	-1.11492	-0.129321	3.98784e-08	5.21541e-09	0.512858	9.05635e-07	1.3482e-07	0.777445	Y	Y	N	0.330335	0.70639	0.114688	0.900995	0.995233
chr12_22796697_22796956	-4.68353	2.44746	7.13099	0.0128633	0.0990484	0.000120857	0.0406381	0.219718	0.00169352	N	N	Y	0.976908	1.50024	0.123632	0.901391	0.995233
chr19_52785364_52786666	2.10762	2.76679	0.659165	6.56207e-09	2.81309e-14	0.0400602	1.81559e-07	1.73262e-12	0.148198	Y	Y	N	0.437042	0.51689	-0.108708	0.905145	0.995233
chr2_192141613_192160952	-5.04733	1.42089	6.46822	0.00296895	0.256595	0.000124249	0.0130831	0.439001	0.00172654	N	N	N	0.718636	1.33455	0.118919	0.905769	0.995233
chr10_11893996_11894214	-0.0582369	-8.06744	-8.0092	0.879374	6.53737e-11	8.98081e-11	0.940525	2.54418e-09	5.4956e-09	N	Y	Y	0.618379	0.676127	-0.114341	0.906088	0.995233
chr15_67956935_67995746	-3.44469	-3.87577	-0.431089	0.00763697	0.00416561	0.75762	0.0258569	0.021888	0.953998	Y	Y	N	0.862431	0.879687	-0.117316	0.906361	0.995233
chr1_29362338_29365938	0.893245	2.45582	1.56258	0.0247746	2.63606e-10	2.38065e-05	0.0712748	9.06368e-09	0.000423515	N	Y	Y	0.718636	1.18127	0.109054	0.913227	0.995233
chr2_143642918_143643105	-6.68576	-5.97012	0	0.00113442	0.00365528	1	0.00708875	0.0198629	1	N	N	N	0.451262	0.524411	0.0933869	0.919472	0.995233
chr14_50131344_50141145	-7.27835	-0.458696	6.81966	2.52756e-07	0.572404	1.63118e-06	4.93187e-06	0.736483	4.21704e-05	Y	N	Y	0.330335	0.676127	0.088375	0.923303	0.995233
chr5_72374007_72378652	-6.76479	-0.128071	6.63672	0.000268594	0.92993	0.000369667	0.00228385	0.984212	0.00430311	Y	N	N	0.330335	0.676127	0.088375	0.923303	0.995233
chr15_31200321_31206294	-0.335318	-5.547	-5.21168	0.836476	0.00533927	0.00896684	0.91488	0.0260455	0.0497494	N	Y	N	0.524319	0.524411	-0.0880206	0.924103	0.995233
chr8_52773421_52773806	-2.85306	0.253017	3.10608	0.0127897	0.816566	0.00688409	0.0404908	0.912262	0.0407787	N	N	N	0.755723	0.957225	0.0947927	0.924264	0.995233
chr11_68153784_68157520	4.54185	4.71651	0.174661	1.4035e-11	2.71383e-12	0.745687	5.88224e-10	1.29007e-10	0.945576	Y	Y	N	0.662162	1.17375	0.0929255	0.926108	0.995233
chr8_95676925_95677424	6.96403	8.10262	1.13859	1.68056e-07	1.06001e-09	0.0741945	3.39129e-06	3.23623e-08	0.220337	Y	Y	N	1.36017	2.29965	0.0863899	0.927221	0.995233
chr22_42204879_42206295	-0.0951438	0.794785	0.889928	0.747881	0.00687431	0.00255327	0.859802	0.0308951	0.0197797	N	N	N	0.258272	0.243313	-0.0640533	0.936124	0.995233
chr3_185251359_185252920	-7.4814	-6.76576	0	3.14395e-05	0.000166826	1	0.000374892	0.00162983	1	Y	Y	N	1.22203	1.63843	0.078788	0.936533	0.995233
chr3_188472846_188478070	-5.77284	-5.0572	0	0.00490634	0.0137248	1	0.0179317	0.0451524	NA	N	N	N	0.588607	0.676127	-0.0746071	0.938381	0.995233
chr17_76411033_76415806	-5.87215	0.468568	6.34072	0.00330912	0.774915	0.00153824	0.0137492	0.881928	0.0135536	Y	N	N	1.24568	1.63167	0.0688377	0.944117	0.995233
chr12_98989211_98989439	-6.42707	-0.923334	5.50374	0.000725757	0.548272	0.00426433	0.00508461	0.717593	0.0288762	Y	N	N	0.437042	0.573995	0.0639769	0.944407	0.995233
chr19_11230768_11231198	1.5145	1.90914	0.394644	9.24942e-08	2.54731e-11	0.137123	1.95563e-06	1.0804e-09	0.336626	Y	Y	N	0.524319	0.879687	0.0675632	0.944526	0.995233
chr5_87581558_87588460	-6.52673	-5.81108	0	0.00175875	0.00534937	1	0.00982934	0.0260768	1	Y	Y	N	1.18005	1.25598	0.0691885	0.945065	0.995233
chr6_53385576_53387325	-5.76369	-0.598508	5.16519	0.000819676	0.651164	0.00319689	0.00558784	0.797267	0.0234064	N	N	N	0.524319	0.797988	0.066783	0.945082	0.995233
chr8_128867401_128903244	3.42014	-0.285594	-3.70574	0.00888926	0.83962	0.00651976	0.029418	0.927629	0.0392126	Y	N	N	0.258272	0.273577	-0.0533871	0.946765	0.995233
chr2_236945205_236957925	-0.105139	-5.4448	-5.33966	0.948432	0.00630444	0.00741566	0.982413	0.0292624	0.0430858	N	Y	N	0.437042	0.690187	0.0514166	0.956533	0.995233
chr8_27382879_27394372	5.73923	-1.16569	-6.90492	0.000442307	0.561785	7.10067e-05	0.0033979	0.728784	0.00108627	Y	N	Y	2.76253	2.87025	0.0427059	0.959002	0.995233
chr12_28378728_28412375	-10.6881	-9.9725	0	7.29273e-19	1.26951e-16	1	7.82643e-17	1.02181e-14	1	Y	Y	N	0.598163	0.620557	-0.043398	0.963709	0.995233
chr11_65271200_65272066	-6.39633	-5.68069	0	0.00191332	0.00584857	1	0.0103762	0.0278397	1	Y	Y	N	1.42013	1.92536	0.0434666	0.963948	0.995233
chr11_62649365_62655690	-6.01534	-5.2997	0	0.00468882	0.012729	1	0.0173516	0.0425482	NA	Y	N	N	0.856434	1.123	-0.0430874	0.965789	0.995233
chr13_43639822_43659974	6.26394	6.47061	0.206675	0.00144612	0.00103175	0.896997	0.0085092	0.00750638	1	N	Y	N	5.23262	4.67162	-0.0316012	0.966061	0.995233
chr17_76410960_76415756	0	6.45223	6.46833	1	0.00235704	0.00229843	1	0.0140767	0.0182289	N	N	N	0.330335	0.446873	0.0342363	0.9681	0.995233
chr9_86292642_86301070	-0.235082	-6.18144	-5.94636	0.869587	0.000801794	0.00127227	0.935776	0.0061188	0.0116247	N	Y	N	0.895061	1.57462	0.0331301	0.973584	0.995233
chr5_50045985_50059076	5.76507	6.70368	0.938618	0.0144358	0.00441249	0.647944	0.0449052	0.022863	0.881249	N	N	N	0.524319	0.836928	0.0297181	0.975502	0.995233
chr8_141874411_141900868	-2.10671	-1.91099	0.195721	3.29841e-33	6.84202e-26	0.308074	8.98563e-31	1.182e-23	0.570001	Y	Y	N	0.524319	0.836928	0.0297181	0.975502	0.995233
chr2_62227836_62228117	0.267302	-2.793	-3.0603	0.750549	0.0040584	0.00160314	0.861192	0.021425	0.0139742	N	N	N	2.39414	3.46371	0.025506	0.975723	0.995233
chr12_111923069_111924628	-5.7811	-5.06545	0	0.00275131	0.00870107	1	0.0127787	0.0344878	NA	Y	N	N	0.437042	0.676127	-0.0240274	0.979534	0.995233
chr15_65799581_65804902	-5.95343	-0.224817	5.72861	0.00282433	0.89125	0.00432148	0.0128554	0.960394	0.0290275	Y	N	N	0.437042	0.676127	-0.0240274	0.979534	0.995233
chr1_213251038_213290752	-1.24498	-1.30144	-0.0564572	5.0354e-05	4.87971e-05	0.864527	0.000561665	0.000564755	1	Y	Y	N	0.192991	0.432813	-0.0123831	0.987718	0.995233
chr1_98144651_98165103	-6.3586	-5.64296	0	0.00266085	0.00766948	1	0.0125899	0.0326362	1	Y	Y	N	0.192991	0.432813	-0.0123831	0.987718	0.995233
chr12_20766377_20774345	-6.80088	-6.08524	0	0.000955045	0.00311828	1	0.00627513	0.0176271	1	Y	Y	N	0.192991	0.432813	-0.0123831	0.987718	0.995233
chr17_49091593_49133843	-6.30779	-5.59215	0	0.00236816	0.00704241	1	0.0119047	0.0311954	1	N	Y	N	0.192991	0.432813	-0.0123831	0.987718	0.995233
chr18_60015401_60017170	-6.27362	-5.55798	0	0.0024327	0.00723626	1	0.0121173	0.0316973	1	Y	Y	N	0.192991	0.432813	-0.0123831	0.987718	0.995233
chr3_143704385_143708679	-0.293867	-7.92708	-7.63321	0.66802	5.37256e-09	1.95697e-08	0.80278	1.38378e-07	7.63332e-07	N	Y	Y	0.192991	0.432813	-0.0123831	0.987718	0.995233
chr3_154832783_154836600	-7.14923	-0.795624	6.35361	6.29886e-05	0.56179	0.000416972	0.000682184	0.728784	0.00476233	Y	N	N	0.192991	0.432813	-0.0123831	0.987718	0.995233
chrX_47705504_47755339	-0.123476	0.919175	1.04265	0.46463	4.16244e-08	5.50584e-10	0.649363	9.18461e-07	2.84682e-08	N	N	Y	0.192991	0.432813	-0.0123831	0.987718	0.995233
chr14_90397885_90398971	-0.484288	-2.00213	-1.51784	0.265195	2.85798e-05	0.00162356	0.453812	0.000350226	0.0140456	N	Y	N	0.755723	0.850989	0.0151878	0.987817	0.995233
chr12_104682709_104683320	-8.58103	-7.86539	0	3.70033e-10	9.26938e-09	1	1.23629e-08	2.31996e-07	1	Y	Y	N	0.192991	0.243313	-0.0120842	0.987921	0.995233
chr17_29061917_29096983	6.95726	5.90254	-1.05472	0.000121101	0.00125649	0.454751	0.00116938	0.00869961	0.725469	Y	N	N	0.192991	0.243313	-0.0120842	0.987921	0.995233
chr9_100756913_100760960	-2.01754	-2.12887	-0.111334	1.84366e-06	2.19857e-06	0.814369	2.98824e-05	3.46923e-05	0.983113	Y	Y	N	0.192991	0.243313	-0.0120842	0.987921	0.995233
chrX_21869627_21871621	-8.64376	-7.92812	0	2.12361e-10	5.66992e-09	1	7.37329e-09	1.44461e-07	1	Y	Y	N	0.192991	0.243313	-0.0120842	0.987921	0.995233
chr1_245180544_245246990	-5.86966	-5.15402	0	0.0050348	0.0137845	1	0.0182924	0.0452435	NA	Y	N	N	0.192991	0.273577	-0.0120841	0.987921	0.995233
chr4_148867768_148887990	-1.55895	-1.1625	0.396451	5.57245e-07	0.000236848	0.227731	1.01204e-05	0.00220157	0.472021	Y	Y	N	0.192991	0.273577	-0.0120841	0.987921	0.995233
chr4_186180002_186188309	5.14588	-1.75277	-6.89864	0.000993571	0.369277	9.92919e-05	0.00644457	0.558528	0.00145555	Y	N	Y	0.192991	0.273577	-0.0120841	0.987921	0.995233
chr5_138117612_138163407	4.44414	-1.70977	-6.15392	0.0139636	0.426531	0.00194863	0.0435894	0.613446	0.0161257	Y	N	Y	0.192991	0.273577	-0.0120841	0.987921	0.995233
chr9_102677460_102691125	-1.33361	-0.030146	1.30346	7.25684e-06	0.916395	1.92435e-05	0.0001028	0.976064	0.000351655	Y	N	Y	0.192991	0.273577	-0.0120841	0.987921	0.995233
chr11_120343759_120348235	2.03423	2.33541	0.301178	1.49313e-05	8.2035e-07	0.489626	0.000194409	1.42067e-05	0.75848	Y	Y	N	1.02744	1.45485	0.00749047	0.994007	0.998535
chr16_88066715_88071617	-8.18125	-7.46561	0	3.95924e-08	5.38119e-07	1	9.04623e-07	9.55263e-06	1	Y	Y	N	0.330335	0.404115	-0.00184386	0.998252	0.998535
chr17_29061915_29111910	-6.21755	-5.5019	0	0.00290033	0.00840562	1	0.0129606	0.0342239	1	Y	Y	N	0.330335	0.404115	-0.00184386	0.998252	0.998535
chr2_143676178_143685310	-6.87347	-6.15783	0	0.000674683	0.00232136	1	0.00478356	0.013887	1	Y	Y	N	0.330335	0.404115	-0.00184386	0.998252	0.998535
chr5_65284463_65310553	-3.07819	-3.4625	-0.384312	6.91063e-27	2.79748e-27	0.263255	1.28811e-24	5.8278e-25	0.514929	Y	Y	N	0.330335	0.404115	-0.00184386	0.998252	0.998535
chr1_108724563_108738102	-1.72836	-6.79553	-5.06718	0.195766	0.000114654	0.00431238	0.367119	0.00118901	0.0289996	N	Y	N	0	0	NA	NA	NA
chr1_109200073_109202584	-0.334013	-5.83168	-5.49767	0.829313	0.00255577	0.00451115	0.910278	0.0150104	0.029762	N	Y	N	0	0	NA	NA	NA
chr1_114372214_114377061	6.58389	6.90794	0.324049	0.000644759	0.000351286	0.833864	0.00461762	0.00310632	0.992705	N	Y	N	0	0	NA	NA	NA
chr1_115005726_115007010	-1.00082	-1.73772	-0.736904	0.000137435	1.56448e-09	0.0123877	0.00130141	4.61716e-08	0.0637054	Y	Y	N	0	0	NA	NA	NA
chr1_1158624_1159348	2.56634	2.08388	-0.482468	0.000272337	0.00387063	0.461842	0.00230737	0.0208326	0.732404	Y	N	N	0	0	NA	NA	NA
chr1_1158624_1164326	7.01185	0	-6.31231	0.000386851	1	0.00139916	0.00307771	1	0.0126284	Y	N	Y	0	0	NA	NA	NA
chr1_116202262_116206889	3.26976	2.8769	-0.39286	0.00373104	0.0115167	0.708592	0.0147308	0.0396056	0.922117	N	N	N	0	0	NA	NA	NA
chr1_1192372_1203372	1.88221	2.88172	0.999518	0.0064927	2.85205e-05	0.119798	0.022532	0.000350105	0.304866	N	Y	N	0	0	NA	NA	NA
chr1_12638746_12640694	0.54344	-6.25868	-6.80212	0.692353	0.000520702	0.000158858	0.821155	0.00432372	0.00209007	N	Y	Y	0	0	NA	NA	NA
chr1_144921835_144922638	1.28353	-4.74562	-6.02915	0.405336	0.0140223	0.00167321	0.598208	0.0458215	0.0143818	NA	NA	NA	0	0	NA	NA	NA
chr1_150413399_150416853	-7.31836	-1.40671	5.91165	2.17039e-05	0.278541	0.000710258	0.000270649	0.46258	0.00735624	N	N	N	0	0	NA	NA	NA
chr1_151288049_151288985	0.198532	-5.42569	-5.62423	0.872671	0.00137592	0.000896971	0.937511	0.00931705	0.0088023	N	Y	Y	0	0	NA	NA	NA
chr1_151611364_151611595	-1.05836	-0.296497	0.761862	4.38873e-08	0.124502	0.000117985	9.8998e-07	0.260978	0.00166729	Y	N	N	0	0	NA	NA	NA
chr1_151630711_151641111	-7.16619	-1.32785	5.83834	5.85408e-05	0.335473	0.0012262	0.000641864	0.525465	0.0112758	Y	N	N	0	0	NA	NA	NA
chr1_155377933_155385714	-6.12172	-5.40607	0	0.00253267	0.00766605	1	0.0123149	0.0326362	NA	Y	Y	N	0	0	NA	NA	NA
chr1_155695173_155695810	-1.40248	-0.4553	0.947177	2.3809e-05	0.165375	0.00577897	0.00029389	0.3218	0.0358232	Y	N	N	0	0	NA	NA	NA
chr1_155823067_155823597	-0.00517571	0.921725	0.926901	0.982136	5.81693e-05	5.24931e-05	1	0.000662384	0.000829689	N	N	N	0	0	NA	NA	NA
chr1_155927504_155928187	-6.06198	-5.34634	0	0.00451675	0.0122663	1	0.0168646	0.0414712	NA	Y	N	N	0	0	NA	NA	NA
chr1_156202111_156203519	-6.26658	-5.55094	0	0.00254629	0.00751416	1	0.012353	0.0322532	1	Y	Y	N	0	0	NA	NA	NA
chr1_156303338_156304709	-1.39802	0.0944878	1.49251	0.000293815	0.798486	0.000149301	0.0024565	0.898012	0.00199567	Y	N	Y	0	0	NA	NA	NA
chr1_16116601_16123438	-6.79587	-6.08022	0	0.000900418	0.00297492	1	0.00599505	0.0170067	1	Y	Y	N	0	0	NA	NA	NA
chr1_165648679_165652347	-1.39231	-7.81314	-6.42083	0.0182943	2.27566e-09	1.01789e-06	0.0550929	6.63312e-08	2.75989e-05	Y	Y	Y	0	0	NA	NA	NA
chr1_165649724_165664634	-5.78536	-5.06972	0	0.00395809	0.0115683	1	0.0152437	0.0396795	NA	N	N	N	0	0	NA	NA	NA
chr1_167935867_167944253	-1.63629	-1.07104	0.56525	3.19223e-09	0.000115631	0.0488014	9.4605e-08	0.00119739	0.16667	Y	Y	N	0	0	NA	NA	NA
chr1_172520652_172526934	-0.797476	-1.3609	-0.563425	0.0155896	7.05591e-05	0.103501	0.0481347	0.000789107	0.277028	N	Y	N	0	0	NA	NA	NA
chr1_175956079_175958615	-0.657485	-6.20121	-5.54372	0.64973	0.000819077	0.0028473	0.789845	0.00619821	0.021373	N	Y	N	0	0	NA	NA	NA
chr1_175996708_176015460	-1.1485	-5.51515	-4.36665	0.070528	3.39305e-06	0.000255702	0.165853	5.17953e-05	0.00312369	N	Y	N	0	0	NA	NA	NA
chr1_176118142_176145143	-0.365737	-2.67124	-2.3055	0.613998	0.00174147	0.00712286	0.764265	0.011183	0.0417482	N	N	N	0	0	NA	NA	NA
chr1_176132005_176153828	-1.55281	-1.33798	0.214832	6.03677e-08	7.23191e-06	0.496175	1.3279e-06	0.000102653	0.76361	Y	Y	N	0	0	NA	NA	NA
chr1_178777180_178802685	-5.92003	-5.20438	0	0.00379101	0.0109253	1	0.0148759	0.0383373	NA	Y	N	N	0	0	NA	NA	NA
chr1_179271812_179276351	-6.2673	-5.55166	0	0.00232622	0.00698899	1	0.011769	0.0311259	1	Y	Y	N	0	0	NA	NA	NA
chr1_179959642_179961356	-6.4848	-0.993227	5.49157	0.00109214	0.545046	0.00628156	0.006944	0.715184	0.0380545	Y	N	N	0	0	NA	NA	NA
chr1_180971742_180974599	1.14007	0.849429	-0.290638	0.000273465	0.00926681	0.34898	0.00231416	0.0353647	0.617262	Y	N	N	0	0	NA	NA	NA
chr1_197611841_197643299	-7.22231	-6.50667	0	0.000179914	0.000739449	1	0.0016443	0.00576819	1	Y	Y	N	0	0	NA	NA	NA
chr1_198231705_198266370	-6.26136	-5.54572	0	0.00251254	0.00744074	1	0.0122733	0.0321113	1	Y	Y	N	0	0	NA	NA	NA
chr1_198247091_198266370	-0.343235	-5.98926	-5.64602	0.727523	8.18596e-05	0.000210859	0.84524	0.000896153	0.00267892	N	Y	N	0	0	NA	NA	NA
chr1_200729967_200730226	-1.72943	-2.17151	-0.442081	6.09826e-05	1.84915e-06	0.345192	0.000663502	2.96996e-05	0.612674	Y	Y	N	0	0	NA	NA	NA
chr1_200729967_200784772	-0.952786	-1.02777	-0.0749803	0.000246898	0.00014872	0.787344	0.00212895	0.0014774	0.97018	N	Y	N	0	0	NA	NA	NA
chr1_207989274_207990759	-2.03996	-1.35502	0.684941	0.000140654	0.0115209	0.216525	0.00132656	0.0396056	0.456742	Y	N	N	0	0	NA	NA	NA
chr1_21076216_21076468	-6.4213	-5.70566	0	0.00231392	0.0067869	1	0.011735	0.0307487	1	Y	Y	N	0	0	NA	NA	NA
chr1_21076216_21100103	-1.02046	-0.857819	0.162641	0.00272594	0.0143817	0.652277	0.0127271	0.0467918	0.884203	Y	N	N	0	0	NA	NA	NA
chr1_21083659_21100103	-1.03604	-1.77841	-0.742373	0.000353941	2.27761e-08	0.0227347	0.00285206	5.30669e-07	0.0991762	Y	Y	N	0	0	NA	NA	NA
chr1_21091870_21100103	-0.276611	-1.86057	-1.58396	0.541214	0.000213685	0.00169361	0.712001	0.00201805	0.0145198	N	Y	N	0	0	NA	NA	NA
chr1_212502477_212519275	-5.93245	-5.21681	0	0.00459737	0.0126989	1	0.0171114	0.042539	NA	Y	N	N	0	0	NA	NA	NA
chr1_213037067_213046160	-7.65589	-0.999873	6.65602	3.41471e-08	0.196143	2.0765e-06	7.90405e-07	0.36445	5.1488e-05	Y	N	Y	0	0	NA	NA	NA
chr1_21327692_21329301	-2.36032	-2.21185	0.14847	0.000990789	0.00245578	0.843581	0.00643586	0.0145437	0.997816	Y	Y	N	0	0	NA	NA	NA
chr1_21377359_21415706	-7.47024	-6.75459	0	9.82004e-05	0.000428533	1	0.00099223	0.00368809	1	Y	Y	N	0	0	NA	NA	NA
chr1_21377359_21437876	-7.31794	-6.6023	0	7.52881e-05	0.000354577	1	0.000801903	0.00313151	1	Y	Y	N	0	0	NA	NA	NA
chr1_214068006_214074752	0	7.70727	7.72337	1	3.64032e-06	3.47429e-06	1	5.50949e-05	8.10263e-05	N	Y	Y	0	0	NA	NA	NA
chr1_214068006_214089442	0	7.62788	7.64398	1	8.57541e-06	8.20876e-06	1	0.000119802	0.000172721	N	Y	Y	0	0	NA	NA	NA
chr1_214068006_214139627	0	8.40774	8.42384	1	3.85275e-09	3.59878e-09	1	1.05363e-07	1.62188e-07	N	Y	Y	0	0	NA	NA	NA
chr1_214089278_214139601	0	6.83845	6.85456	1	0.00106025	0.00103175	1	0.00763187	0.00986825	N	Y	Y	0	0	NA	NA	NA
chr1_214089278_214139627	0	8.82406	8.84016	1	2.32021e-10	2.15262e-10	1	8.09558e-09	1.18661e-08	N	Y	Y	0	0	NA	NA	NA
chr1_214110597_214139627	0	7.50853	7.52464	1	4.05562e-05	3.9043e-05	1	0.000479712	0.000639845	N	Y	Y	0	0	NA	NA	NA
chr1_214133453_214139627	0	7.83922	7.85532	1	1.28633e-06	1.22359e-06	1	2.1274e-05	3.27432e-05	N	Y	Y	0	0	NA	NA	NA
chr1_214139414_214141405	0	6.49858	6.51469	1	0.00225455	0.00219844	1	0.0136022	0.0176457	N	Y	Y	0	0	NA	NA	NA
chr1_21415631_21437876	-2.48468	-1.88257	0.602108	0.000883825	0.0119343	0.431043	0.00593378	0.0407378	0.704326	N	Y	N	0	0	NA	NA	NA
chr1_21431610_21437876	-6.60567	-5.89003	0	0.00169041	0.00511541	1	0.0095404	0.0253926	1	Y	Y	N	0	0	NA	NA	NA
chr1_214625148_214638300	0.538753	-6.20651	-6.74526	0.563943	3.34225e-05	6.21213e-06	0.727933	0.000403151	0.000137658	N	Y	Y	0	0	NA	NA	NA
chr1_215342542_215345526	-7.73309	-7.01745	0	2.93071e-06	2.20629e-05	1	4.53237e-05	0.000280559	1	Y	Y	N	0	0	NA	NA	NA
chr1_219963690_219965397	6.94708	0	-6.24755	0.000515959	1	0.00179219	0.00385907	1	0.0152086	Y	N	Y	0	0	NA	NA	NA
chr1_220771673_220792097	-6.23339	-5.51775	0	0.00234068	0.0070637	1	0.0117939	0.0312701	1	Y	Y	N	0	0	NA	NA	NA
chr1_224918164_224922408	0	6.69103	6.70714	1	0.0011904	0.00115831	1	0.00835827	0.0107753	N	Y	Y	0	0	NA	NA	NA
chr1_225140372_225156576	-6.08857	-1.44469	4.64388	1.05469e-06	0.0612367	0.000250368	1.80443e-05	0.150447	0.00307542	Y	N	Y	0	0	NA	NA	NA
chr1_225140372_225195246	-2.2481	0.236455	2.48456	0.0014006	0.727079	0.000438238	0.0083365	0.850929	0.00496273	N	N	N	0	0	NA	NA	NA
chr1_225195115_225211567	-6.63144	-0.590546	6.04089	3.17115e-05	0.596871	0.000177218	0.0003775	0.75359	0.00230868	Y	N	N	0	0	NA	NA	NA
chr1_225195115_225284941	-8.62314	-1.15944	7.4637	2.6397e-11	0.0407872	1.02911e-08	1.07454e-09	0.108984	4.30919e-07	Y	N	Y	0	0	NA	NA	NA
chr1_225273246_225284941	-5.86498	-5.14933	0	0.00330437	0.00989652	1	0.0137433	0.036433	NA	Y	N	N	0	0	NA	NA	NA
chr1_225273412_225284941	-5.3032	0.765816	6.06902	8.27668e-11	0.0576122	1.03158e-13	3.22108e-09	0.143131	1.18631e-11	Y	N	Y	0	0	NA	NA	NA
chr1_227192695_227204751	-2.51794	-2.36301	0.154928	0.00321861	0.00686107	0.864342	0.0135566	0.0308848	1	N	Y	N	0	0	NA	NA	NA
chr1_227381487_227387353	-3.526	-3.7876	-0.261604	0.00797767	0.00696888	0.858819	0.0268054	0.0311259	1	Y	Y	N	0	0	NA	NA	NA
chr1_227381487_227400920	-1.91713	-1.6915	0.225639	0.00113506	0.00532278	0.7237	0.00708875	0.0260009	0.931508	Y	N	N	0	0	NA	NA	NA
chr1_227381487_227504947	-5.9679	-5.25226	0	0.00306187	0.00915175	1	0.0132725	0.0351903	NA	Y	N	N	0	0	NA	NA	NA
chr1_230398319_230401113	-5.83996	-5.12431	0	0.00352982	0.0104708	1	0.0142505	0.037397	NA	Y	N	N	0	0	NA	NA	NA
chr1_231084645_231097049	0	6.46508	6.48119	1	0.00190637	0.00185724	1	0.0119706	0.0156172	N	Y	N	0	0	NA	NA	NA
chr1_231506308_231509845	-1.09046	-4.12469	-3.03423	0.126955	3.12397e-06	0.000661916	0.265885	4.81023e-05	0.00693089	N	Y	N	0	0	NA	NA	NA
chr1_233372591_233388534	-5.52095	1.14054	6.66148	0.000490152	0.294105	2.39245e-05	0.00369335	0.480639	0.000424406	N	N	Y	0	0	NA	NA	NA
chr1_233482188_233490757	-1.42208	-1.06137	0.360706	0.000400081	0.00967717	0.40021	0.00315214	0.0360755	0.674431	Y	N	N	0	0	NA	NA	NA
chr1_23356962_23377013	-1.59561	-1.21903	0.37658	1.40874e-20	2.4768e-12	0.0365265	1.66301e-18	1.18535e-10	0.138901	Y	Y	N	0	0	NA	NA	NA
chr1_235582732_235597595	-6.79001	-6.07437	0	0.000962097	0.00314265	1	0.00630392	0.0177039	1	Y	Y	N	0	0	NA	NA	NA
chr1_236332006_236347206	-1.80682	-6.7656	-4.95878	0.176117	0.000120942	0.00520731	0.340272	0.00124329	0.0330159	N	Y	N	0	0	NA	NA	NA
chr1_24143165_24147083	-1.1992	-6.61436	-5.41516	0.396735	0.00029301	0.00316253	0.590849	0.00265056	0.0233047	N	Y	N	0	0	NA	NA	NA
chr1_243362362_243375266	-5.78104	-5.0654	0	0.00346915	0.010438	1	0.0141056	0.0373398	NA	Y	N	N	0	0	NA	NA	NA
chr1_244715624_244724447	-6.39126	-5.67561	0	0.00200619	0.00608071	1	0.0106761	0.0286036	1	Y	Y	N	0	0	NA	NA	NA
chr1_246490503_246498776	-1.17618	-2.014	-0.837822	0.00343989	2.30474e-06	0.0529804	0.0140141	3.61162e-05	0.175027	Y	Y	N	0	0	NA	NA	NA
chr1_246670356_246835919	-6.68037	-5.96473	0	0.00112338	0.00362966	1	0.00705956	0.0198065	1	Y	Y	N	0	0	NA	NA	NA
chr1_246899277_246907427	-6.02944	-5.3138	0	0.00327737	0.00955744	1	0.0136834	0.035966	NA	Y	N	N	0	0	NA	NA	NA
chr1_247319708_247323115	0.194875	1.27565	1.08078	0.400468	3.08905e-08	2.47852e-06	0.594533	6.99033e-07	6.10027e-05	N	Y	Y	0	0	NA	NA	NA
chr1_247320302_247323115	-2.58399	-0.433089	2.15091	7.6904e-37	0.026218	2.17505e-25	2.8669e-34	0.0758898	6.59436e-23	Y	N	Y	0	0	NA	NA	NA
chr1_247320386_247323115	-7.27242	1.01308	8.2855	2.47064e-08	0.0794866	2.00434e-10	5.993e-07	0.185168	1.11408e-08	Y	N	Y	0	0	NA	NA	NA
chr1_28337458_28343750	-6.45993	-5.74429	0	0.00213596	0.00632433	1	0.0111411	0.0293162	1	Y	Y	N	0	0	NA	NA	NA
chr1_31478700_31479949	-1.31021	-1.13939	0.170819	1.19243e-05	0.000193838	0.586403	0.000159358	0.00185034	0.838437	Y	Y	N	0	0	NA	NA	NA
chr1_32495899_32498935	-6.11602	-5.40038	0	0.00284824	0.00842521	1	0.0128744	0.0342392	NA	Y	Y	N	0	0	NA	NA	NA
chr1_3496389_3512011	7.25687	0	-6.55733	0.000201911	1	0.000784157	0.00180801	1	0.00791275	Y	N	Y	0	0	NA	NA	NA
chr1_36814371_36823872	0.128251	-3.64917	-3.77742	0.890144	0.00311653	0.00219065	0.945243	0.0176271	0.0176044	N	N	N	0	0	NA	NA	NA
chr1_38052912_38054683	-6.16543	-0.32508	5.84035	0.00194093	0.842547	0.00355081	0.0104478	0.929847	0.0252763	N	N	N	0	0	NA	NA	NA
chr1_40654727_40668286	-0.265266	-2.3715	-2.10624	0.53967	2.19919e-06	2.78232e-05	0.710367	3.46923e-05	0.000482028	N	Y	Y	0	0	NA	NA	NA
chr1_42094420_42094618	-5.91957	-5.20392	0	0.00292343	0.00889837	1	0.0129797	0.0347846	NA	Y	N	N	0	0	NA	NA	NA
chr1_44773982_44818597	-5.7756	-5.05995	0	0.00416477	0.0120609	1	0.0158257	0.0410232	NA	N	N	N	0	0	NA	NA	NA
chr1_44804717_44804994	-6.66499	0.1138	6.77879	7.90832e-06	0.904222	6.04433e-06	0.000110265	0.968582	0.000134835	Y	N	Y	0	0	NA	NA	NA
chr1_45553553_45553909	-2.72086	0.238328	2.95918	0.00828381	0.80862	0.00420549	0.0276244	0.906243	0.0286231	N	N	N	0	0	NA	NA	NA
chr1_46290105_46295253	2.00913	-0.631693	-2.64082	0.00569753	0.422793	0.00058696	0.0201175	0.610653	0.00627407	Y	N	N	0	0	NA	NA	NA
chr1_51001041_51061888	0.186394	1.90024	1.71385	0.748877	0.000816246	0.00234578	0.860322	0.00619001	0.0185383	N	Y	Y	0	0	NA	NA	NA
chr1_51005264_51061888	0.0570933	1.30098	1.24389	0.892412	0.00172974	0.00266553	0.946392	0.011138	0.0204828	N	N	N	0	0	NA	NA	NA
chr1_51032749_51050483	-6.27994	-5.5643	0	0.00296569	0.00847154	1	0.0130831	0.0342582	1	Y	Y	N	0	0	NA	NA	NA
chr1_51032749_51061888	-0.733661	0.0816107	0.815271	0.0075305	0.76542	0.00351155	0.0256066	0.875844	0.0251579	N	N	N	0	0	NA	NA	NA
chr1_52956404_52975384	-6.68637	-5.97073	0	0.0011777	0.00376753	1	0.00731082	0.020355	1	Y	Y	N	0	0	NA	NA	NA
chr1_52959283_52975384	-1.79307	-1.74087	0.0522065	2.90079e-40	3.22491e-35	0.722673	1.14146e-37	1.08772e-32	0.930905	Y	Y	N	0	0	NA	NA	NA
chr1_53326403_53333449	-5.7811	-5.06545	0	0.00275131	0.00870107	1	0.0127787	0.0344878	NA	Y	N	N	0	0	NA	NA	NA
chr1_53343354_53347337	-5.79025	-5.07461	0	0.0033388	0.0101119	1	0.0138055	0.0367861	NA	Y	N	N	0	0	NA	NA	NA
chr1_53343354_53358647	-6.80991	-6.09427	0	0.000823421	0.00275979	1	0.00560259	0.0159964	1	Y	Y	N	0	0	NA	NA	NA
chr1_53351505_53358647	-6.9421	-6.22646	0	0.000539056	0.00191041	1	0.00398553	0.0119853	1	Y	Y	N	0	0	NA	NA	NA
chr1_54254806_54262817	-5.92356	-5.20791	0	0.00288109	0.00879021	1	0.0129169	0.0345983	NA	Y	N	N	0	0	NA	NA	NA
chr1_55637229_55643805	-6.41738	-5.70174	0	0.00400302	0.0105583	1	0.0153511	0.0376179	1	Y	Y	N	0	0	NA	NA	NA
chr1_6007164_6012896	-3.29548	0.056544	3.35203	0.00189591	0.953398	0.00168255	0.010306	0.997919	0.0144435	N	N	N	0	0	NA	NA	NA
chr1_61743192_61849037	-6.57048	-5.85484	0	0.00143137	0.00449734	1	0.00844162	0.0231902	1	Y	Y	N	0	0	NA	NA	NA
chr1_63944435_63955889	-7.68951	-0.76231	6.9272	1.0221e-08	0.264171	3.16268e-07	2.71142e-07	0.446646	9.76622e-06	N	N	Y	0	0	NA	NA	NA
chr1_65016277_65068595	5.65331	7.66154	2.00823	0.00141673	1.32773e-05	0.132373	0.00838153	0.00017744	0.32847	N	Y	N	0	0	NA	NA	NA
chr1_70650468_70654956	-7.1082	-6.39256	0	0.000345384	0.0012893	1	0.0028119	0.00887844	1	Y	Y	N	0	0	NA	NA	NA
chr1_85816098_85824530	-0.523313	-3.50346	-2.98015	0.160112	1.59691e-13	4.19014e-10	0.318471	8.76816e-12	2.21811e-08	N	Y	Y	0	0	NA	NA	NA
chr1_8601273_8674745	-1.23694	-0.0277315	1.20921	4.71344e-08	0.899871	1.91233e-07	1.0565e-06	0.966604	6.25258e-06	Y	N	Y	0	0	NA	NA	NA
chr1_86241357_86252144	-6.00154	-5.28589	0	0.0040173	0.0112846	1	0.015376	0.0390658	NA	Y	N	N	0	0	NA	NA	NA
chr1_89236035_89251896	1.00132	-5.32971	-6.33103	0.322764	0.000557483	3.7032e-05	0.516875	0.0045702	0.000614436	N	N	N	0	0	NA	NA	NA
chr1_91356594_91383711	-6.61818	-5.90253	0	0.00203837	0.00594065	1	0.0107905	0.0281456	1	Y	Y	N	0	0	NA	NA	NA
chr1_93070864_93073284	-6.98106	-2.06846	4.9126	7.89434e-05	0.138083	0.00686912	0.000829608	0.281831	0.0407262	Y	N	N	0	0	NA	NA	NA
chr1_94032836_94033408	-0.312675	-2.79452	-2.48184	0.191985	1.89379e-24	1.58967e-19	0.362912	2.91603e-22	3.02945e-17	N	Y	Y	0	0	NA	NA	NA
chr1_94037227_94041686	0.795943	-6.05871	-6.85465	0.323976	2.00755e-05	1.2841e-06	0.51823	0.000257133	3.38536e-05	N	Y	Y	0	0	NA	NA	NA
chr1_94140170_94140497	0.0864663	-1.94782	-2.03429	0.885319	0.00282934	0.00180067	0.942398	0.0163194	0.0152417	N	N	Y	0	0	NA	NA	NA
chr1_94360170_94363454	-0.932122	-3.54764	-2.61551	0.194359	2.9573e-05	0.00223775	0.365528	0.000361148	0.0178752	N	Y	N	0	0	NA	NA	NA
chr1_94685814_94697199	-0.865382	-4.8127	-3.94732	0.0433777	2.79109e-10	2.70175e-07	0.109295	9.50448e-09	8.38169e-06	N	Y	Y	0	0	NA	NA	NA
chr1_97981282_98015300	-7.42916	-6.71352	0	3.79343e-05	0.000196974	1	0.000440721	0.00187271	1	Y	Y	N	0	0	NA	NA	NA
chr1_9991949_9994918	-0.196044	0.771819	0.967863	0.411269	0.00113422	4.84085e-05	0.602736	0.00804169	0.000774304	N	N	N	0	0	NA	NA	NA
chr10_103432672_103436193	2.47551	0.885242	-1.59027	8.65821e-06	0.130654	0.00392194	0.00011908	0.270908	0.0273062	Y	N	Y	0	0	NA	NA	NA
chr10_103783234_103789502	-5.7282	0.820232	6.54843	0.004199	0.616493	0.00105625	0.0159131	0.769719	0.0100359	N	N	N	0	0	NA	NA	NA
chr10_104018686_104044827	-7.74049	-7.02485	0	4.58503e-06	3.19338e-05	1	6.76578e-05	0.000387307	1	Y	Y	N	0	0	NA	NA	NA
chr10_104018686_104103939	-8.6676	-7.95195	0	1.60215e-10	4.4299e-09	1	5.67402e-09	1.17192e-07	1	Y	Y	N	0	0	NA	NA	NA
chr10_1130343_1142186	0.137712	1.55109	1.41338	0.587724	5.20625e-10	1.2694e-08	0.745629	1.69935e-08	5.19442e-07	N	Y	Y	0	0	NA	NA	NA
chr10_1130343_1151207	1.57725	1.57609	-0.00115191	0.00560706	0.00623996	0.998342	0.0198611	0.029096	1	N	N	N	0	0	NA	NA	NA
chr10_120488807_120489922	-0.486019	-1.65662	-1.1706	0.165338	1.98352e-05	0.0028236	0.325733	0.000254977	0.0213289	N	Y	N	0	0	NA	NA	NA
chr10_12123471_12133683	0.448633	-5.37383	-5.82246	0.672646	0.000634794	0.000204787	0.806078	0.00507956	0.00262678	N	Y	N	0	0	NA	NA	NA
chr10_12160748_12162266	-6.04503	-5.32938	0	0.00278121	0.00836786	1	0.0128418	0.0341957	NA	N	N	N	0	0	NA	NA	NA
chr10_12257739_12280484	-1.18924	0.229203	1.41844	0.000771659	0.503208	7.60973e-05	0.00532838	0.680714	0.00115357	Y	N	Y	0	0	NA	NA	NA
chr10_12291580_12292468	-6.03134	1.29865	7.32999	3.79557e-05	0.145112	4.90722e-07	0.000440721	0.292328	1.43558e-05	Y	N	Y	0	0	NA	NA	NA
chr10_12442015_12445368	-8.95793	-8.24229	0	1.24213e-11	4.548e-10	1	5.29999e-10	1.4983e-08	1	Y	Y	N	0	0	NA	NA	NA
chr10_12442720_12445368	-8.12605	-7.4104	0	7.69715e-08	9.54457e-07	1	1.6471e-06	1.62902e-05	1	Y	Y	N	0	0	NA	NA	NA
chr10_126370176_126370948	3.03827	4.66263	1.62436	0.0140962	0.000151889	0.147043	0.0439451	0.00150255	0.354183	N	Y	N	0	0	NA	NA	NA
chr10_126776760_126811437	-6.88177	-6.16613	0	0.000743286	0.00250844	1	0.00519901	0.0148124	1	Y	Y	N	0	0	NA	NA	NA
chr10_126799559_126811437	-1.51076	-0.816608	0.694148	1.12611e-06	0.00855483	0.0310211	1.91276e-05	0.0344036	0.123603	Y	N	N	0	0	NA	NA	NA
chr10_12802947_12811798	-6.08724	-5.3716	0	0.00269992	0.00811386	1	0.0126502	0.0336452	NA	Y	Y	N	0	0	NA	NA	NA
chr10_12856194_12858327	-6.68156	-5.96592	0	0.00113407	0.00365691	1	0.00708875	0.0198629	1	Y	Y	N	0	0	NA	NA	NA
chr10_128923738_128926028	-5.20641	1.57995	6.78636	0.00175175	0.187431	3.88438e-05	0.00980841	0.352913	0.000638148	N	N	Y	0	0	NA	NA	NA
chr10_134503896_134540409	-7.40139	-1.55928	5.84211	1.41067e-05	0.221373	0.000729897	0.000185721	0.396056	0.00753624	Y	N	N	0	0	NA	NA	NA
chr10_15317854_15326104	0.465007	-5.34073	-5.80574	0.778593	0.00820671	0.00398551	0.880251	0.0337954	0.0276047	N	N	N	0	0	NA	NA	NA
chr10_15875629_15889942	-5.15461	-5.30877	-0.154157	0.0103539	0.0102552	0.942405	0.0337647	0.0370662	1	Y	Y	N	0	0	NA	NA	NA
chr10_17636204_17646046	-6.31144	-5.5958	0	0.00533695	0.0135089	1	0.0190917	0.0447745	1	Y	Y	N	0	0	NA	NA	NA
chr10_17645559_17646046	-1.90176	-7.05443	-5.15267	0.150346	5.68695e-05	0.00352409	0.303305	0.000649688	0.0252207	N	Y	N	0	0	NA	NA	NA
chr10_225934_267296	-0.377863	1.5165	1.89437	0.298566	1.71189e-05	1.12343e-07	0.489864	0.000222891	3.90274e-06	N	Y	Y	0	0	NA	NA	NA
chr10_24918925_24924032	-7.24382	-6.52818	0	0.00012376	0.000541519	1	0.0011878	0.00445997	1	Y	Y	N	0	0	NA	NA	NA
chr10_26994215_27009288	3.94322	3.59829	-0.344928	0.00651607	0.0135829	0.796694	0.022602	0.0448939	0.975039	N	N	N	0	0	NA	NA	NA
chr10_27855761_27867642	-6.12695	-5.4113	0	0.00278503	0.0082608	1	0.012851	0.0338803	NA	Y	Y	N	0	0	NA	NA	NA
chr10_28023385_28024303	-6.1601	-5.44446	0	0.00308321	0.00890912	1	0.0133405	0.0347909	1	Y	Y	N	0	0	NA	NA	NA
chr10_28223939_28225809	-6.95541	-6.23977	0	0.000984423	0.00311733	1	0.0064087	0.0176271	1	Y	Y	N	0	0	NA	NA	NA
chr10_28420489_28438988	-6.40217	-5.68653	0	0.00225743	0.00667373	1	0.0116202	0.0304968	1	Y	Y	N	0	0	NA	NA	NA
chr10_30736711_30740673	-5.9642	-5.24855	0	0.00532904	0.0142027	1	0.0190731	0.0462943	NA	Y	N	N	0	0	NA	NA	NA
chr10_31644073_31676195	-5.8405	-5.12486	0	0.00367719	0.0108126	1	0.0145913	0.0381209	NA	Y	N	N	0	0	NA	NA	NA
chr10_31661947_31676727	-5.87824	-5.1626	0	0.00334489	0.00996873	1	0.0138115	0.0365072	NA	N	N	N	0	0	NA	NA	NA
chr10_32197100_32199491	2.22087	2.12165	-0.09922	2.06383e-52	1.92651e-47	0.485704	1.04415e-49	1.04965e-44	0.75569	Y	Y	N	0	0	NA	NA	NA
chr10_34985246_34989132	-6.30701	-5.59136	0	0.00242118	0.00716942	1	0.0120843	0.0315999	1	Y	Y	N	0	0	NA	NA	NA
chr10_486811_518489	-8.06331	-3.87988	4.18343	2.63449e-06	0.00487983	0.0207602	4.12834e-05	0.0245134	0.0923754	Y	Y	N	0	0	NA	NA	NA
chr10_486811_532470	-8.63622	-7.92058	0	2.30153e-10	6.08535e-09	1	7.91348e-09	1.53938e-07	1	Y	Y	N	0	0	NA	NA	NA
chr10_50701163_50714058	-7.27752	-6.56188	0	0.000108601	0.00048318	1	0.00106837	0.00406456	1	Y	Y	N	0	0	NA	NA	NA
chr10_518379_532470	-7.93544	-1.63647	6.29897	1.1567e-06	0.159612	0.000136112	1.95535e-05	0.313601	0.00184525	Y	N	N	0	0	NA	NA	NA
chr10_52066604_52071175	-6.17189	-5.45625	0	0.00312742	0.00899358	1	0.0134437	0.0349007	1	Y	Y	N	0	0	NA	NA	NA
chr10_52100147_52104105	-6.00533	-5.28969	0	0.00299343	0.00893131	1	0.0131122	0.0348351	NA	Y	N	N	0	0	NA	NA	NA
chr10_52193236_52350007	-2.268	-2.99463	-0.726626	0.00753649	0.000727583	0.421025	0.0256147	0.00568816	0.694629	Y	Y	N	0	0	NA	NA	NA
chr10_52220433_52350007	-6.58614	-5.8705	0	0.00207184	0.00604934	1	0.0109026	0.0285269	1	Y	Y	N	0	0	NA	NA	NA
chr10_5836848_5842668	0.448671	1.38281	0.934135	0.0506207	1.26415e-09	2.77097e-05	0.124755	3.80974e-08	0.000481311	N	Y	N	0	0	NA	NA	NA
chr10_60374053_60380661	-5.77844	-5.0628	0	0.00358007	0.0107042	1	0.0143463	0.0378735	NA	Y	N	N	0	0	NA	NA	NA
chr10_60549022_60553375	-6.54076	-5.82511	0	0.00154406	0.00480473	1	0.00892054	0.0241823	1	Y	Y	N	0	0	NA	NA	NA
chr10_62021617_62039397	0	7.48667	7.50277	1	5.21711e-05	5.02708e-05	1	0.000601837	0.000798348	N	Y	Y	0	0	NA	NA	NA
chr10_64148155_64159552	-6.33977	-5.62413	0	0.00298886	0.00844477	1	0.0131084	0.0342582	1	Y	Y	N	0	0	NA	NA	NA
chr10_64148155_64219556	-5.80875	-5.09311	0	0.00448292	0.012707	1	0.0167772	0.042539	NA	Y	N	N	0	0	NA	NA	NA
chr10_65140078_65214849	-2.49233	-1.98038	0.511952	0.000101142	0.0022253	0.452684	0.00101471	0.0134716	0.723556	Y	Y	N	0	0	NA	NA	NA
chr10_6875605_6880164	-6.01103	-5.29539	0	0.00316514	0.00932592	1	0.0135052	0.0354946	NA	Y	N	N	0	0	NA	NA	NA
chr10_69785303_69804320	-7.79241	-2.11459	5.67782	1.03378e-06	0.0614049	0.000484851	1.77725e-05	0.150637	0.00538992	Y	N	N	0	0	NA	NA	NA
chr10_69797850_69826974	-6.11563	-5.39999	0	0.00263722	0.0079251	1	0.012579	0.0332939	NA	Y	Y	N	0	0	NA	NA	NA
chr10_69902697_69909868	-8.68369	-7.96805	0	1.34456e-10	3.79731e-09	1	4.92487e-09	1.04713e-07	1	Y	Y	N	0	0	NA	NA	NA
chr10_69902697_69918384	-6.07833	-5.36268	0	0.00265793	0.00802571	1	0.0125899	0.033574	NA	Y	Y	N	0	0	NA	NA	NA
chr10_69966527_69970304	-6.81621	-6.10056	0	0.000916947	0.00300904	1	0.00606985	0.0171603	1	Y	Y	N	0	0	NA	NA	NA
chr10_70190193_70190417	-7.10599	-0.61493	6.49106	0.000113856	0.669242	0.000458625	0.00111234	0.810336	0.00514952	Y	N	N	0	0	NA	NA	NA
chr10_70218861_70229920	-1.92238	-1.2964	0.625977	8.22753e-06	0.00269775	0.158231	0.00011449	0.0156753	0.372407	Y	Y	N	0	0	NA	NA	NA
chr10_70227880_70229920	-0.119172	0.891636	1.01081	0.485968	1.5773e-07	3.01101e-09	0.66746	3.14705e-06	1.36622e-07	N	N	N	0	0	NA	NA	NA
chr10_70411603_70433244	4.72968	7.69498	2.9653	0.00557428	4.25872e-06	0.0173593	0.0197809	6.37728e-05	0.0811398	N	Y	Y	0	0	NA	NA	NA
chr10_70545893_70546449	-2.19482	0.743855	2.93867	5.99188e-05	0.128551	7.5403e-08	0.00065293	0.267367	2.74829e-06	Y	N	Y	0	0	NA	NA	NA
chr10_72285679_72291210	7.17431	8.6102	1.43589	3.26999e-08	2.88091e-11	0.0103262	7.66932e-07	1.20743e-09	0.0554419	Y	Y	N	0	0	NA	NA	NA
chr10_7262373_7269899	-7.25068	-6.53504	0	0.0001132	0.000502574	1	0.00110745	0.00419285	1	Y	Y	N	0	0	NA	NA	NA
chr10_7262373_7318951	-6.72671	-6.01106	0	0.00102138	0.00333407	1	0.00660678	0.0185217	1	Y	Y	N	0	0	NA	NA	NA
chr10_7262373_7327916	-7.2087	-6.49306	0	0.000149113	0.000635393	1	0.00139336	0.00507956	1	Y	Y	N	0	0	NA	NA	NA
chr10_7285520_7318951	-6.22529	-5.50965	0	0.00242281	0.00727093	1	0.0120843	0.0318098	1	Y	Y	N	0	0	NA	NA	NA
chr10_7285520_7327916	-9.93322	-9.21758	0	4.64982e-16	4.87283e-14	1	3.57985e-14	2.87619e-12	1	Y	Y	N	0	0	NA	NA	NA
chr10_7290510_7327916	-7.31118	-6.59554	0	8.57131e-05	0.000395052	1	0.000884994	0.0034322	1	Y	Y	N	0	0	NA	NA	NA
chr10_74468041_74475660	-3.17827	-2.67639	0.501877	0.00395782	0.0154441	0.653247	0.0152437	0.0495649	0.884522	N	Y	N	0	0	NA	NA	NA
chr10_74468041_74501603	-6.6106	-5.89496	0	0.00156694	0.0048071	1	0.0090233	0.0241823	1	Y	Y	N	0	0	NA	NA	NA
chr10_74474869_74475660	-4.58191	-3.6254	0.956514	0.00120722	0.0101435	0.507177	0.0074744	0.0368441	0.773205	Y	Y	N	0	0	NA	NA	NA
chr10_74501480_74502031	-8.53106	-7.81542	0	1.0913e-09	2.34885e-08	1	3.46624e-08	5.45471e-07	1	Y	Y	N	0	0	NA	NA	NA
chr10_75848954_75984349	-6.91654	-6.2009	0	0.000653631	0.00224558	1	0.004667	0.0135596	1	Y	Y	N	0	0	NA	NA	NA
chr10_76002496_76158337	-6.06156	-5.34592	0	0.00450604	0.012244	1	0.0168342	0.0414154	NA	Y	N	N	0	0	NA	NA	NA
chr10_86130770_86133571	-6.1191	-5.40346	0	0.00255753	0.00772935	1	0.0123736	0.0328012	NA	Y	Y	N	0	0	NA	NA	NA
chr10_86177527_86185649	-1.01552	0.0637748	1.0793	9.34522e-12	0.662293	1.50773e-12	4.06087e-10	0.80553	1.43666e-10	Y	N	Y	0	0	NA	NA	NA
chr10_93220184_93221941	-7.04185	-6.3262	0	0.00034122	0.00129177	1	0.0027844	0.0088831	1	Y	Y	N	0	0	NA	NA	NA
chr10_93870833_93940776	-7.56884	-6.8532	0	1.54566e-05	9.09976e-05	1	0.000199415	0.000984025	1	Y	Y	N	0	0	NA	NA	NA
chr10_93870833_93952393	-6.90946	-6.19382	0	0.000612942	0.00213347	1	0.00440758	0.013027	1	Y	Y	N	0	0	NA	NA	NA
chr10_93902786_93952393	-4.14714	-6.94306	-2.79592	0.00905716	0.000243665	0.156505	0.0298769	0.00225605	0.369257	Y	Y	N	0	0	NA	NA	NA
chr10_94733810_94774024	-7.27009	-1.38783	5.88226	2.86915e-05	0.292369	0.000835259	0.000345029	0.478477	0.00827813	Y	N	Y	0	0	NA	NA	NA
chr10_96005703_96006378	-8.71657	-8.00092	0	1.61058e-10	4.37072e-09	1	5.6755e-09	1.16822e-07	1	Y	Y	N	0	0	NA	NA	NA
chr10_96201653_96204296	-6.3934	-5.67776	0	0.00213648	0.00639381	1	0.0111411	0.0295803	1	N	Y	N	0	0	NA	NA	NA
chr10_98703870_98711953	-5.79025	0.479914	6.27016	0.000407245	0.682356	0.00013329	0.00319791	0.820008	0.00181438	N	N	N	0	0	NA	NA	NA
chr11_10019813_10024236	-6.00496	-5.28931	0	0.0032081	0.0094359	1	0.0135336	0.0357404	NA	Y	N	N	0	0	NA	NA	NA
chr11_103173822_103182762	-6.46474	-5.7491	0	0.00183615	0.00559458	1	0.010118	0.0268836	1	Y	Y	N	0	0	NA	NA	NA
chr11_103173822_103187349	-7.8006	-1.72581	6.07479	1.42658e-06	0.133379	0.000213844	2.37194e-05	0.275108	0.00271167	Y	N	N	0	0	NA	NA	NA
chr11_103182607_103194718	-6.82899	-6.11334	0	0.000756619	0.00256788	1	0.00525405	0.0150619	1	Y	Y	N	0	0	NA	NA	NA
chr11_106680719_106681204	-6.36574	-5.65009	0	0.00213104	0.0064097	1	0.0111411	0.0296215	1	Y	Y	N	0	0	NA	NA	NA
chr11_106810186_106810904	-6.82434	-6.1087	0	0.00079335	0.00267098	1	0.00543978	0.015558	1	Y	Y	N	0	0	NA	NA	NA
chr11_106810186_106856857	-7.41898	-6.70334	0	4.47618e-05	0.000226273	1	0.000509723	0.00211437	1	Y	Y	N	0	0	NA	NA	NA
chr11_106849345_106856857	-10.4746	-9.75897	0	3.84747e-18	5.96846e-16	1	3.78495e-16	4.4036e-14	1	Y	Y	N	0	0	NA	NA	NA
chr11_107959254_107960350	-5.69315	1.30342	6.99657	0.000243068	0.207243	5.80521e-06	0.00210987	0.378325	0.000129935	N	N	N	0	0	NA	NA	NA
chr11_117023157_117034608	1.59335	1.49692	-0.0964266	1.90106e-09	3.05005e-08	0.70697	5.80395e-08	6.93228e-07	0.921013	Y	Y	N	0	0	NA	NA	NA
chr11_118997645_118997835	-6.06748	0.763092	6.83057	0.00147811	0.615597	0.000343654	0.00864527	0.768737	0.00404264	N	N	N	0	0	NA	NA	NA
chr11_119002245_119003929	3.60982	3.35833	-0.2515	1.31265e-13	1.24245e-11	0.515996	7.26367e-12	5.50016e-10	0.778949	Y	Y	N	0	0	NA	NA	NA
chr11_11901724_11919240	-7.32989	-6.61424	0	0.000119897	0.000518902	1	0.00116333	0.00431383	1	Y	Y	N	0	0	NA	NA	NA
chr11_120310838_120316173	1.91797	2.79552	0.877546	0.0026693	1.12618e-05	0.131496	0.0126044	0.000153694	0.32739	N	Y	N	0	0	NA	NA	NA
chr11_120345269_120348235	0.858224	1.14891	0.290684	0.000675674	7.62676e-06	0.237816	0.0047858	0.000107893	0.48346	N	N	N	0	0	NA	NA	NA
chr11_120524394_120531109	0	8.06996	8.08606	1	2.21724e-07	2.09785e-07	1	4.26758e-06	6.82569e-06	N	Y	Y	0	0	NA	NA	NA
chr11_121348827_121367758	0	6.72039	6.73649	1	0.0011678	0.00113635	1	0.00826323	0.0106453	N	Y	Y	0	0	NA	NA	NA
chr11_122953793_122955421	-6.90065	-6.18501	0	0.000775791	0.00258932	1	0.00534526	0.0151572	1	Y	Y	N	0	0	NA	NA	NA
chr11_126051390_126052982	0	7.02158	7.03768	1	0.000446289	0.000432988	1	0.00380393	0.00491999	N	Y	Y	0	0	NA	NA	NA
chr11_128910823_128936763	3.36916	2.95658	-0.412588	0.000277976	0.001534	0.639676	0.00234673	0.0101073	0.875967	Y	Y	N	0	0	NA	NA	NA
chr11_128932175_128936763	2.31503	2.64127	0.326243	1.06555e-16	6.57463e-21	0.184738	8.67508e-15	7.27626e-19	0.410238	Y	Y	N	0	0	NA	NA	NA
chr11_128963516_128994789	1.81666	-0.583673	-2.40033	0.0113232	0.438921	0.00121685	0.0364664	0.624789	0.0112407	Y	N	N	0	0	NA	NA	NA
chr11_128963516_129034322	1.76648	1.74185	-0.0246326	1.00301e-15	1.28871e-14	0.903689	7.32406e-14	8.14991e-13	1	Y	Y	N	0	0	NA	NA	NA
chr11_128993341_128994789	3.23182	2.48889	-0.742928	9.75406e-19	2.53025e-11	0.0268599	1.00128e-16	1.07962e-09	0.110658	Y	Y	N	0	0	NA	NA	NA
chr11_128993341_128997200	0.92363	1.20293	0.279296	0.00906472	0.000790565	0.42033	0.0298769	0.00607329	0.694477	N	N	N	0	0	NA	NA	NA
chr11_128993341_129034322	1.84332	1.62835	-0.21497	4.67636e-25	4.87138e-19	0.205112	7.04738e-23	4.85971e-17	0.43939	Y	Y	N	0	0	NA	NA	NA
chr11_129551030_129552361	0	7.60753	7.62363	1	1.7576e-05	1.68716e-05	1	0.000228424	0.000314339	N	Y	Y	0	0	NA	NA	NA
chr11_13009949_13048585	-5.87064	-5.15499	0	0.00280178	0.00868118	1	0.0128554	0.034477	NA	Y	N	N	0	0	NA	NA	NA
chr11_130130751_130131824	1.04036	0.283724	-0.756638	1.94577e-10	0.104422	6.63433e-06	6.7891e-09	0.228957	0.000144611	N	N	N	0	0	NA	NA	NA
chr11_1307232_1311639	4.11547	4.64009	0.524626	4.15599e-06	2.18985e-07	0.465518	6.22344e-05	4.22634e-06	0.735648	N	Y	N	0	0	NA	NA	NA
chr11_1307232_1317024	4.45206	4.16812	-0.283942	5.81492e-08	4.58777e-07	0.682153	1.2895e-06	8.31079e-06	0.901986	Y	Y	N	0	0	NA	NA	NA
chr11_13435077_13443385	1.74034	1.5875	-0.152833	1.40741e-06	1.42428e-05	0.663379	2.34557e-05	0.000189272	0.891075	Y	Y	N	0	0	NA	NA	NA
chr11_17899755_18029623	4.00749	4.68471	0.677222	0.0138495	0.00402141	0.632535	0.0432904	0.0212669	0.871287	N	Y	N	0	0	NA	NA	NA
chr11_17899755_18031686	3.53746	4.2473	0.709848	8.36671e-05	2.32626e-06	0.310923	0.000871491	3.63728e-05	0.573684	Y	Y	N	0	0	NA	NA	NA
chr11_18010144_18029623	3.11968	3.48338	0.363709	2.09101e-07	7.724e-09	0.49648	4.12551e-06	1.94694e-07	0.763903	Y	Y	N	0	0	NA	NA	NA
chr11_18010144_18031686	3.33389	4.44458	1.11069	0.00253669	5.38574e-05	0.241856	0.0123149	0.000620279	0.487512	N	Y	N	0	0	NA	NA	NA
chr11_18305342_18308257	-0.61236	-6.27569	-5.66333	0.680759	0.000876862	0.00273412	0.812711	0.00654458	0.020818	N	Y	N	0	0	NA	NA	NA
chr11_18312989_18313566	-0.5303	-1.72728	-1.19697	0.121939	3.43123e-06	0.00141521	0.257235	5.22653e-05	0.0126874	N	Y	N	0	0	NA	NA	NA
chr11_27412641_27434407	-6.15242	-5.43678	0	0.002639	0.00788003	1	0.012579	0.0331439	NA	Y	Y	N	0	0	NA	NA	NA
chr11_28250418_28252532	-0.0326445	-3.28564	-3.25299	0.971925	0.00323521	0.00355927	0.997991	0.0180575	0.0252826	N	N	N	0	0	NA	NA	NA
chr11_28311753_28318478	-6.04461	-5.32896	0	0.0026625	0.00808374	1	0.0125899	0.0336019	NA	Y	N	N	0	0	NA	NA	NA
chr11_28700652_28763455	-7.37997	-6.66432	0	5.97072e-05	0.000289267	1	0.000651628	0.00262677	1	Y	Y	N	0	0	NA	NA	NA
chr11_28711107_28763455	-6.17613	-5.46048	0	0.00354849	0.00994074	1	0.0142563	0.0365009	1	Y	Y	N	0	0	NA	NA	NA
chr11_33307959_33309057	1.8575	0.0439215	-1.81357	3.32113e-98	0.637632	2.83653e-89	7.8412e-95	0.785998	1.89196e-85	Y	N	Y	0	0	NA	NA	NA
chr11_38113314_38144663	-5.81257	-5.09693	0	0.00359761	0.0106803	1	0.0143884	0.0378381	NA	Y	N	N	0	0	NA	NA	NA
chr11_38116674_38144663	-6.3067	-5.59106	0	0.00255523	0.00748619	1	0.0123736	0.0321752	1	Y	Y	N	0	0	NA	NA	NA
chr11_43436140_43457884	-7.08048	-0.47018	6.6103	7.43278e-07	0.580061	4.61103e-06	1.30961e-05	0.742692	0.000105689	Y	N	N	0	0	NA	NA	NA
chr11_46098305_46113774	-0.850049	-0.704677	0.145372	4.38963e-05	0.000896205	0.500678	0.000500673	0.00666788	0.767706	N	N	N	0	0	NA	NA	NA
chr11_46515158_46529920	-1.7101	-2.75946	-1.04935	0.000221475	4.45434e-09	0.0263568	0.0019487	1.17192e-07	0.109458	Y	Y	N	0	0	NA	NA	NA
chr11_57258697_57259335	6.42702	9.22557	2.79855	0.00128478	3.4747e-06	0.0831203	0.00781123	5.28139e-05	0.239968	N	Y	N	0	0	NA	NA	NA
chr11_61096835_61097546	-1.8773	-0.359691	1.5176	0.000285968	0.472008	0.00413987	0.00239926	0.652839	0.0284084	Y	N	N	0	0	NA	NA	NA
chr11_62406455_62407203	1.85004	2.5165	0.666458	3.6485e-11	2.35969e-19	0.0112651	1.46033e-09	2.38767e-17	0.0591639	Y	Y	N	0	0	NA	NA	NA
chr11_62621273_62622688	-4.87406	1.59808	6.47214	0.014676	0.328214	0.00109408	0.0455324	0.518566	0.0103218	N	N	N	0	0	NA	NA	NA
chr11_6344815_6345265	-6.30358	-5.58794	0	0.00222474	0.00670323	1	0.0114853	0.0305135	1	Y	Y	N	0	0	NA	NA	NA
chr11_65202524_65205128	-6.22288	-0.563908	5.65897	0.00181932	0.732299	0.0049459	0.0100684	0.854627	0.0319767	Y	N	N	0	0	NA	NA	NA
chr11_66407149_66407594	-4.02363	-0.896556	3.12707	2.73361e-05	0.319889	0.00123438	0.000331544	0.509392	0.0113095	N	N	N	0	0	NA	NA	NA
chr11_66589114_66595835	0.102484	-6.19894	-6.30143	0.895503	9.88399e-06	6.93888e-06	0.947765	0.000136065	0.000149298	N	Y	Y	0	0	NA	NA	NA
chr11_68527037_68529155	2.69018	2.11595	-0.574233	1.04703e-07	4.51776e-05	0.219328	2.18765e-06	0.000528914	0.460761	Y	Y	N	0	0	NA	NA	NA
chr11_68571468_68575106	1.57245	2.24402	0.671565	0.00249784	1.61413e-05	0.179131	0.0122217	0.000212307	0.402562	Y	Y	N	0	0	NA	NA	NA
chr11_70200407_70202360	2.48482	1.82065	-0.664174	1.10909e-12	5.74204e-07	0.0371121	5.59314e-11	1.01424e-05	0.140487	Y	Y	N	0	0	NA	NA	NA
chr11_72695133_72700142	-1.13137	-0.790438	0.34093	4.59501e-05	0.00526886	0.245227	0.000521577	0.0258803	0.491929	Y	N	N	0	0	NA	NA	NA
chr11_76670023_76709865	-7.36754	-1.87001	5.49753	1.44417e-05	0.143653	0.00150294	0.000189076	0.289802	0.0133306	N	N	N	0	0	NA	NA	NA
chr11_76687333_76709865	-5.86346	-5.14782	0	0.00315726	0.00955024	1	0.013496	0.035966	NA	Y	N	N	0	0	NA	NA	NA
chr11_77336008_77336863	-0.880381	0.202851	1.08323	0.000614985	0.423413	3.23931e-05	0.00441779	0.611165	0.000545612	N	N	Y	0	0	NA	NA	NA
chr11_77823696_77832220	2.75198	2.71758	-0.0343954	0.00812396	0.00956878	0.971656	0.0271938	0.035966	1	N	N	N	0	0	NA	NA	NA
chr11_82984690_82989872	-6.35655	-0.596761	5.75979	0.000909456	0.700018	0.00289805	0.00603718	0.832616	0.0216947	Y	N	N	0	0	NA	NA	NA
chr11_85707869_85742653	-6.60807	-5.89243	0	0.00164579	0.00500394	1	0.00934064	0.02501	1	Y	Y	N	0	0	NA	NA	NA
chr11_86778736_86868448	-6.11391	-5.39826	0	0.00371236	0.0104077	1	0.0146897	0.0373398	NA	Y	Y	N	0	0	NA	NA	NA
chr11_8987451_8989588	-7.09229	-6.37665	0	0.000312782	0.00119208	1	0.00257609	0.00835987	1	Y	Y	N	0	0	NA	NA	NA
chr11_9069490_9074762	-5.787	-5.07136	0	0.0032193	0.0098323	1	0.0135566	0.0362909	NA	Y	N	N	0	0	NA	NA	NA
chr11_9225207_9229179	0.629132	-3.62617	-4.2553	0.46479	0.00223377	0.000313951	0.649459	0.0135113	0.00374367	N	N	Y	0	0	NA	NA	NA
chr11_9304918_9309353	-7.00951	-6.29387	0	0.000427925	0.00156351	1	0.00330894	0.0102731	1	Y	Y	N	0	0	NA	NA	NA
chr11_9492849_9501093	-5.93254	-5.21689	0	0.00409419	0.0115861	1	0.0156414	0.0397022	NA	Y	N	N	0	0	NA	NA	NA
chr11_9597435_9598810	-5.97086	-5.25522	0	0.00332289	0.00975896	1	0.0137731	0.0361345	NA	Y	N	N	0	0	NA	NA	NA
chr11_9983504_10011142	-2.95109	-6.94913	-3.99804	0.0143397	2.3145e-05	0.0173004	0.0446651	0.000292221	0.0809254	Y	Y	N	0	0	NA	NA	NA
chr12_101413812_101442179	-5.77784	-5.0622	0	0.00283389	0.00891081	1	0.0128669	0.0347909	NA	Y	N	N	0	0	NA	NA	NA
chr12_102107868_102114032	-6.2678	-5.55215	0	0.00322283	0.00907232	1	0.0135635	0.0349996	1	Y	Y	N	0	0	NA	NA	NA
chr12_104712691_104715094	-6.94002	-6.22438	0	0.000570128	0.00200053	1	0.00414601	0.0123861	1	Y	Y	N	0	0	NA	NA	NA
chr12_105303433_105322472	-6.08811	-5.37246	0	0.00269589	0.00810305	1	0.0126502	0.0336424	NA	Y	Y	N	0	0	NA	NA	NA
chr12_106477642_106480663	-6.30863	-5.59298	0	0.0026621	0.00773373	1	0.0125899	0.0328012	1	Y	Y	N	0	0	NA	NA	NA
chr12_106770137_106773917	-5.1013	1.5476	6.6489	0.00893293	0.325827	0.000603285	0.0295112	0.516179	0.00642798	N	N	Y	0	0	NA	NA	NA
chr12_109046048_109048186	0.689721	0.173995	-0.515726	4.77808e-05	0.322897	0.00288135	0.000538903	0.513259	0.021594	N	N	N	0	0	NA	NA	NA
chr12_109212025_109217137	0.0271174	-1.92144	-1.94856	0.96364	0.00325015	0.00282723	0.992217	0.0181266	0.0213322	N	N	N	0	0	NA	NA	NA
chr12_110832906_110839309	-5.86853	-5.15288	0	0.00371925	0.0108569	1	0.0147032	0.0381877	NA	Y	N	N	0	0	NA	NA	NA
chr12_110974729_110989773	-6.26739	-5.55175	0	0.00293338	0.00841434	1	0.0129857	0.0342325	1	Y	Y	N	0	0	NA	NA	NA
chr12_110975949_110989773	-6.17739	-5.46175	0	0.00511441	0.013309	1	0.01847	0.0441949	1	Y	Y	N	0	0	NA	NA	NA
chr12_11181000_11199787	-3.0339	-3.12303	-0.0891273	2.59141e-10	3.01138e-10	0.862334	8.82451e-09	1.01088e-08	1	Y	Y	N	0	0	NA	NA	NA
chr12_11181000_11273779	-6.89971	-6.18406	0	0.000950756	0.00305707	1	0.00626438	0.0173782	1	Y	Y	N	0	0	NA	NA	NA
chr12_111855923_111856681	3.43244	3.61934	0.186902	0.00134417	0.00076002	0.847174	0.00808212	0.00588331	0.999934	N	Y	N	0	0	NA	NA	NA
chr12_11187381_11199787	-3.63759	-4.16356	-0.525973	0.00385939	0.00102824	0.679873	0.0149951	0.00749279	0.901183	N	Y	N	0	0	NA	NA	NA
chr12_11187381_11273779	-6.34348	-5.62784	0	0.00251867	0.0073564	1	0.0122928	0.0319379	1	Y	Y	N	0	0	NA	NA	NA
chr12_111990084_111993723	-1.35708	-1.54965	-0.192571	1.69711e-18	1.64318e-22	0.233212	1.71724e-16	2.07832e-20	0.477742	Y	Y	N	0	0	NA	NA	NA
chr12_112371690_112381173	-1.41693	-2.65538	-1.23845	0.00327081	1.08045e-06	0.026244	0.0136834	1.81777e-05	0.109336	Y	Y	N	0	0	NA	NA	NA
chr12_112667502_112669519	-5.83053	-5.11489	0	0.00297001	0.00915572	1	0.0130831	0.0351903	NA	Y	N	N	0	0	NA	NA	NA
chr12_11273609_11285966	-5.66559	1.80261	7.4682	0.00154909	0.185204	2.68293e-05	0.00893502	0.34972	0.000468459	N	N	Y	0	0	NA	NA	NA
chr12_113541751_113542103	7.35156	7.92925	0.577692	1.80575e-08	1.29494e-09	0.323837	4.48215e-07	3.87006e-08	0.588598	Y	N	N	0	0	NA	NA	NA
chr12_116534474_116549317	0.445054	-1.89034	-2.33539	0.0221934	1.08919e-15	1.75447e-23	0.0648808	7.63834e-14	4.87598e-21	N	Y	Y	0	0	NA	NA	NA
chr12_116668238_116675510	2.18934	0.935353	-1.25399	4.85673e-09	0.0174239	0.000686428	1.38154e-07	0.0542954	0.00713158	Y	N	Y	0	0	NA	NA	NA
chr12_116674626_116675510	1.98744	-0.145306	-2.13275	2.51469e-05	0.767782	9.7793e-06	0.000308158	0.877129	0.000200701	Y	N	Y	0	0	NA	NA	NA
chr12_117365828_117402659	-5.90507	-5.18943	0	0.00423725	0.0119595	1	0.0160237	0.040795	NA	N	N	N	0	0	NA	NA	NA
chr12_117423011_117426674	-0.876804	-0.176304	0.700501	3.46483e-06	0.351051	0.000335185	5.30052e-05	0.541583	0.00396398	N	N	N	0	0	NA	NA	NA
chr12_120287978_120313985	-6.11245	-5.39681	0	0.00421783	0.0115244	1	0.0159673	0.0396056	NA	Y	Y	N	0	0	NA	NA	NA
chr12_121220458_121229360	-5.08154	-4.79387	0.287669	0.000297097	0.00107332	0.859539	0.00247677	0.00768784	1	Y	Y	N	0	0	NA	NA	NA
chr12_122716677_122717515	-5.77999	-5.06435	0	0.00287804	0.00901595	1	0.0129169	0.0349007	NA	Y	N	N	0	0	NA	NA	NA
chr12_122734418_122735646	-7.29974	-1.7525	5.54724	2.8793e-05	0.190307	0.0017867	0.000345663	0.35708	0.0151812	N	N	N	0	0	NA	NA	NA
chr12_123262038_123265877	-6.2147	-5.49905	0	0.00311194	0.00889634	1	0.0134156	0.0347846	1	N	Y	N	0	0	NA	NA	NA
chr12_12332744_12340053	1.4793	2.10172	0.622418	0.00939226	0.000226934	0.26243	0.030942	0.00211775	0.514069	N	Y	N	0	0	NA	NA	NA
chr12_123651202_123665757	-5.87824	-5.1626	0	0.00334489	0.00996873	1	0.0138115	0.0365072	NA	Y	N	N	0	0	NA	NA	NA
chr12_12397196_12397589	-0.551015	0.108222	0.659237	1.22994e-06	0.342343	1.72598e-08	2.06927e-05	0.532575	6.89358e-07	N	N	N	0	0	NA	NA	NA
chr12_123983091_123984083	-6.26734	-5.5517	0	0.00229266	0.00690816	1	0.0117047	0.0310079	1	Y	Y	N	0	0	NA	NA	NA
chr12_124882665_124934413	-6.14773	-5.43209	0	0.00339982	0.00965068	1	0.0139035	0.0360336	NA	Y	Y	N	0	0	NA	NA	NA
chr12_12788711_12788908	-3.52212	-0.175832	3.34628	0.00114782	0.857589	0.00217718	0.0071441	0.939645	0.0175172	N	N	N	0	0	NA	NA	NA
chr12_12992008_12999533	-6.29854	-5.5829	0	0.00220607	0.00666372	1	0.0114055	0.0304707	1	Y	Y	N	0	0	NA	NA	NA
chr12_133428204_133430159	5.36092	7.11083	1.74991	0.00401151	0.000121869	0.230338	0.015367	0.0012492	0.474499	N	Y	N	0	0	NA	NA	NA
chr12_13906251_13906849	0	6.945	6.96111	1	0.000642829	0.000624454	1	0.00512166	0.00656957	N	Y	Y	0	0	NA	NA	NA
chr12_14018732_14019160	0	6.94223	6.95834	1	0.000566477	0.000549976	1	0.00461721	0.00600383	N	Y	Y	0	0	NA	NA	NA
chr12_19615444_19619784	-0.454604	-5.16301	-4.70841	0.71219	0.00210081	0.00521696	0.833649	0.0129055	0.0330457	N	N	N	0	0	NA	NA	NA
chr12_19646734_19653155	-1.36121	-6.47737	-5.11616	0.333155	0.000362574	0.00511811	0.527788	0.00319417	0.0326415	N	Y	N	0	0	NA	NA	NA
chr12_20076132_20127661	-5.94715	-5.2315	0	0.00337831	0.00992777	1	0.0138396	0.0364722	NA	Y	N	N	0	0	NA	NA	NA
chr12_20769164_20787990	-5.78215	-5.0665	0	0.00297957	0.00926095	1	0.0130839	0.0353647	NA	Y	N	N	0	0	NA	NA	NA
chr12_20774230_20792891	-7.23846	-6.52281	0	0.000219362	0.000867731	1	0.00193492	0.00649698	1	Y	Y	N	0	0	NA	NA	NA
chr12_20790034_20807139	-7.87579	-7.16015	0	2.17788e-06	1.6637e-05	1	3.43562e-05	0.000217819	1	Y	Y	N	0	0	NA	NA	NA
chr12_21028169_21054401	-6.72203	-6.00639	0	0.00153669	0.0046486	1	0.00889668	0.0236679	1	Y	Y	N	0	0	NA	NA	NA
chr12_22637631_22643152	-6.66302	-0.516499	6.14653	0.000537963	0.739145	0.00151621	0.00398347	0.858522	0.0134278	Y	N	N	0	0	NA	NA	NA
chr12_22796697_22826594	-0.0180851	1.10379	1.12188	0.941371	5.29665e-06	3.71756e-06	0.978246	7.73529e-05	8.63976e-05	N	Y	Y	0	0	NA	NA	NA
chr12_27149675_27152609	0.720234	1.76134	1.04111	0.056643	2.57045e-06	0.00418566	0.137539	3.99266e-05	0.0285691	N	Y	N	0	0	NA	NA	NA
chr12_27183667_27185614	6.65578	6.84473	0.188948	7.43961e-06	4.4102e-06	0.839672	0.000104761	6.56249e-05	0.996373	N	N	N	0	0	NA	NA	NA
chr12_27199087_27219830	6.15154	6.65306	0.50152	0.00125127	0.000490231	0.741276	0.00767887	0.00410924	0.943837	Y	N	N	0	0	NA	NA	NA
chr12_27786295_27788048	2.37158	-0.138228	-2.50981	0.00246156	0.87037	0.00208189	0.012184	0.948143	0.0169344	Y	N	N	0	0	NA	NA	NA
chr12_27872741_27877119	-5.76478	0.268916	6.03369	0.00498951	0.875008	0.00338734	0.01817	0.949762	0.0243862	N	N	N	0	0	NA	NA	NA
chr12_28408514_28460682	-1.89755	-0.942892	0.954659	2.8235e-07	0.0096878	0.0138415	5.46417e-06	0.036089	0.0688587	Y	N	N	0	0	NA	NA	NA
chr12_28408514_28544344	-7.33383	-4.74419	2.58964	3.21261e-05	0.00424294	0.201827	0.000381794	0.0221465	0.435096	Y	Y	N	0	0	NA	NA	NA
chr12_28458582_28544344	-3.56942	-2.86525	0.704172	1.43157e-15	1.51828e-10	0.146322	1.01398e-13	5.48672e-09	0.3531	Y	Y	N	0	0	NA	NA	NA
chr12_29786080_29813818	-7.72858	-7.01293	0	4.73934e-06	3.29175e-05	1	6.95005e-05	0.000397875	1	Y	Y	N	0	0	NA	NA	NA
chr12_29812813_29813818	-6.49275	-5.77711	0	0.0024747	0.0070846	1	0.0122147	0.0313235	1	Y	Y	N	0	0	NA	NA	NA
chr12_29812813_29814312	-8.43518	-7.71953	0	3.06507e-09	5.79109e-08	1	9.16029e-08	1.23922e-06	1	Y	Y	N	0	0	NA	NA	NA
chr12_29904599_29911710	-8.4276	-7.71196	0	5.55256e-09	9.57206e-08	1	1.56066e-07	1.97665e-06	1	Y	Y	N	0	0	NA	NA	NA
chr12_29904599_29921008	-6.95724	-6.24159	0	0.000480765	0.00173543	1	0.00364198	0.0111635	1	Y	Y	N	0	0	NA	NA	NA
chr12_32871577_32875567	-6.76531	-0.0841279	6.68119	9.5881e-05	0.948261	0.000124966	0.000974355	0.994599	0.0017329	Y	N	Y	0	0	NA	NA	NA
chr12_39223181_39242464	-8.41672	-7.70108	0	2.86745e-09	5.50925e-08	1	8.60598e-08	1.1897e-06	1	Y	Y	N	0	0	NA	NA	NA
chr12_39223181_39268313	-9.02548	-8.30984	0	3.63914e-12	1.55976e-10	1	1.67377e-10	5.60799e-09	1	Y	Y	N	0	0	NA	NA	NA
chr12_45097509_45108524	7.08328	0	-6.38374	0.000277684	1	0.00105198	0.00234673	1	0.0100096	Y	N	Y	0	0	NA	NA	NA
chr12_46622936_46637097	-0.65608	-0.92924	-0.27316	7.68379e-06	4.34613e-10	0.0680529	0.000107558	1.43849e-08	0.2067	N	N	N	0	0	NA	NA	NA
chr12_46622936_46648719	-1.86916	-1.86107	0.00808757	9.49738e-09	4.44952e-08	0.981872	2.5557e-07	9.69722e-07	1	Y	Y	N	0	0	NA	NA	NA
chr12_46633462_46637097	-0.558032	-0.0687483	0.489283	7.33331e-05	0.627578	0.000651354	0.000782256	0.778755	0.00683295	N	N	N	0	0	NA	NA	NA
chr12_48134425_48137459	8.39111	0	-7.69157	1.21701e-08	1	1.76679e-07	3.16916e-07	1	5.8339e-06	Y	N	Y	0	0	NA	NA	NA
chr12_49227060_49228280	0	6.90208	6.91819	1	0.00119514	0.00116391	1	0.00836482	0.0107974	N	Y	Y	0	0	NA	NA	NA
chr12_49333438_49334971	0.204504	1.52561	1.3211	0.628328	0.000242211	0.00135714	0.774867	0.00224846	0.0123326	N	Y	Y	0	0	NA	NA	NA
chr12_50821545_50824353	1.08161	1.12645	0.0448349	1.32947e-08	1.03281e-08	0.807706	3.42422e-07	2.55784e-07	0.981133	Y	Y	N	0	0	NA	NA	NA
chr12_50821545_50829407	1.82388	1.33609	-0.487795	9.41466e-06	0.00162205	0.221909	0.000128983	0.0105889	0.464136	Y	N	N	0	0	NA	NA	NA
chr12_518534_527802	-1.0736	-1.01743	0.0561694	0.00375908	0.00808381	0.887213	0.014792	0.0336019	1	Y	N	N	0	0	NA	NA	NA
chr12_52139687_52145377	-0.869747	-6.3687	-5.49895	0.544207	0.000545667	0.00292845	0.714012	0.00448892	0.0218488	N	Y	N	0	0	NA	NA	NA
chr12_5269473_5281055	-6.72439	-6.00875	0	0.0017373	0.00513387	1	0.00973517	0.025411	1	Y	Y	N	0	0	NA	NA	NA
chr12_56871444_56872046	6.27536	7.24213	0.966766	2.77426e-05	1.26386e-06	0.306741	0.000335344	2.09647e-05	0.568322	Y	Y	N	0	0	NA	NA	NA
chr12_62892699_62895478	-7.53379	-1.78166	5.75213	7.10302e-06	0.151354	0.000744797	0.000100823	0.301983	0.00763102	Y	N	N	0	0	NA	NA	NA
chr12_63083479_63114069	-6.01241	-5.29677	0	0.00310247	0.00917707	1	0.0133911	0.0351903	NA	Y	N	N	0	0	NA	NA	NA
chr12_64456697_64458999	-6.52014	-5.8045	0	0.00200578	0.00595427	1	0.0106761	0.0281912	1	Y	Y	N	0	0	NA	NA	NA
chr12_64456697_64480806	-6.01298	-5.29734	0	0.00442628	0.0121644	1	0.016588	0.0412251	NA	Y	N	N	0	0	NA	NA	NA
chr12_65702309_65762806	-7.6902	-6.97456	0	9.3276e-06	5.82613e-05	1	0.000128038	0.000662384	1	N	Y	N	0	0	NA	NA	NA
chr12_70193989_70195501	-0.86408	-1.03698	-0.172897	1.07335e-05	3.89378e-07	0.406912	0.000144535	7.12653e-06	0.681895	N	Y	N	0	0	NA	NA	NA
chr12_70901675_70916410	-7.42829	-6.71265	0	3.63316e-05	0.000190118	1	0.000426054	0.0018239	1	Y	Y	N	0	0	NA	NA	NA
chr12_70903992_70916410	-5.78116	-5.06551	0	0.0036481	0.0108584	1	0.01453	0.0381877	NA	Y	N	N	0	0	NA	NA	NA
chr12_7171571_7172603	-5.82941	-5.11376	0	0.00328464	0.00991257	1	0.0136834	0.0364542	NA	Y	N	N	0	0	NA	NA	NA
chr12_72052410_72054207	-6.6488	-5.93316	0	0.00187493	0.00552553	1	0.0102549	0.0266785	1	Y	Y	N	0	0	NA	NA	NA
chr12_7980091_8083238	7.16074	0	-6.4612	0.00019816	1	0.000785676	0.00178118	1	0.0079161	Y	N	Y	0	0	NA	NA	NA
chr12_79986391_79990438	-6.91984	-6.20419	0	0.000663444	0.00227177	1	0.00472293	0.0136595	1	Y	Y	N	0	0	NA	NA	NA
chr12_8082280_8083238	7.74097	0	-7.04143	4.16961e-06	1	2.82936e-05	6.23067e-05	1	0.000487645	Y	N	Y	0	0	NA	NA	NA
chr12_8083076_8084081	7.47172	0	-6.77218	4.92225e-05	1	0.000233948	0.000550779	1	0.00291669	Y	N	Y	0	0	NA	NA	NA
chr12_8808011_8808426	-6.76417	-6.04853	0	0.0012495	0.00390317	1	0.0076775	0.0209162	1	Y	Y	N	0	0	NA	NA	NA
chr12_936208_939326	-1.58019	-1.67316	-0.0929767	1.31221e-09	9.75632e-10	0.744102	4.11255e-08	2.99152e-08	0.944465	Y	Y	N	0	0	NA	NA	NA
chr12_96076483_96077487	-8.08468	-7.36903	0	1.09783e-07	1.30017e-06	1	2.28704e-06	2.13671e-05	1	Y	Y	N	0	0	NA	NA	NA
chr12_96707099_96728643	-6.52117	-5.80553	0	0.00260646	0.00735558	1	0.0125084	0.0319379	1	Y	Y	N	0	0	NA	NA	NA
chr13_101881744_101944717	-5.87412	-5.15848	0	0.00475646	0.0131698	1	0.0175286	0.0437735	NA	Y	N	N	0	0	NA	NA	NA
chr13_101910794_101944717	-7.01004	-6.29439	0	0.000567945	0.00197057	1	0.00413438	0.0122587	1	Y	Y	N	0	0	NA	NA	NA
chr13_101936284_101944717	-8.76245	-8.04681	0	1.31998e-10	3.6323e-09	1	4.92076e-09	1.00893e-07	1	Y	Y	N	0	0	NA	NA	NA
chr13_101997617_102051516	-6.0952	-5.37956	0	0.00351156	0.00998704	1	0.0142209	0.0365214	NA	Y	Y	N	0	0	NA	NA	NA
chr13_102047534_102051516	-6.18202	-5.46638	0	0.00296283	0.00859962	1	0.0130831	0.0344381	1	Y	Y	N	0	0	NA	NA	NA
chr13_108269565_108287727	-6.30437	-5.58873	0	0.00236257	0.00703302	1	0.0118897	0.0311954	1	Y	Y	N	0	0	NA	NA	NA
chr13_111303381_111319820	0	6.69021	6.70631	1	0.0011722	0.00114051	1	0.00827728	0.0106543	N	Y	Y	0	0	NA	NA	NA
chr13_113170754_113181798	-0.139446	1.73517	1.87462	0.528422	1.02857e-15	5.70971e-18	0.701821	7.28539e-14	1.02929e-15	N	Y	Y	0	0	NA	NA	NA
chr13_113669077_113699675	0	7.03827	7.05438	1	0.000637076	0.00061908	1	0.00508727	0.00655717	N	Y	Y	0	0	NA	NA	NA
chr13_113845186_113854830	-2.95022	0.301978	3.2522	7.59817e-05	0.666077	1.36903e-05	0.000806105	0.808123	0.000264678	N	N	N	0	0	NA	NA	NA
chr13_20279802_20283739	0.974568	0.654656	-0.319912	3.41179e-08	0.000378825	0.0707807	7.90405e-07	0.00331671	0.212374	Y	N	N	0	0	NA	NA	NA
chr13_22095384_22122056	6.50281	0	-5.80328	0.00169492	1	0.00508876	0.0095506	1	0.0325116	Y	N	N	0	0	NA	NA	NA
chr13_25051839_25052414	2.44283	-0.840106	-3.28294	0.000898943	0.304906	3.61977e-05	0.00599505	0.492284	0.000603597	Y	N	Y	0	0	NA	NA	NA
chr13_26911704_26928017	1.94486	-0.618756	-2.56362	1.93104e-17	0.0227594	3.18529e-23	1.68859e-15	0.0677617	8.17149e-21	Y	N	Y	0	0	NA	NA	NA
chr13_28748409_28752072	-0.328341	-1.91704	-1.5887	0.342724	1.07441e-06	5.82824e-05	0.53818	1.81192e-05	0.000910406	N	Y	Y	0	0	NA	NA	NA
chr13_28748409_28771483	1.19702	0.270912	-0.926108	0.000521499	0.462071	0.00890024	0.00389229	0.643755	0.0494293	Y	N	N	0	0	NA	NA	NA
chr13_30854200_30857928	1.90894	-0.213387	-2.12233	3.92428e-05	0.675018	1.43129e-05	0.000452698	0.814923	0.000275121	Y	N	Y	0	0	NA	NA	NA
chr13_31789188_31803431	1.25234	-0.365559	-1.6179	0.0029042	0.409112	0.000201265	0.0129618	0.598089	0.00258659	Y	N	Y	0	0	NA	NA	NA
chr13_33306238_33309467	-2.22127	-1.8324	0.388876	3.04017e-14	6.42699e-10	0.208152	1.82488e-12	2.04136e-08	0.443853	Y	Y	N	0	0	NA	NA	NA
chr13_33315218_33320238	-6.93702	-0.819481	6.11753	0.00188884	0.669502	0.00644416	0.0102833	0.810336	0.0388631	Y	N	N	0	0	NA	NA	NA
chr13_35615070_35619538	-6.38301	-5.66737	0	0.00382728	0.0102343	1	0.0149359	0.0370384	1	Y	Y	N	0	0	NA	NA	NA
chr13_36822743_36828280	-6.08947	-5.37383	0	0.00280007	0.00834905	1	0.0128554	0.0341631	NA	Y	Y	N	0	0	NA	NA	NA
chr13_36939637_36943737	-7.00563	-6.28999	0	0.000429566	0.00156949	1	0.00331439	0.0102932	1	Y	Y	N	0	0	NA	NA	NA
chr13_41515057_41515506	6.99113	7.11279	0.121666	1.24005e-06	8.83533e-07	0.887169	2.08135e-05	1.51527e-05	1	Y	Y	N	0	0	NA	NA	NA
chr13_42439872_42442613	1.09688	0.918772	-0.178112	1.62225e-07	1.57641e-05	0.392248	3.28296e-06	0.000208268	0.666295	Y	N	N	0	0	NA	NA	NA
chr13_43986052_43987124	-6.62216	-5.90652	0	0.00286187	0.00781597	1	0.0128858	0.032992	1	Y	Y	N	0	0	NA	NA	NA
chr13_47224336_47243291	4.80076	4.50668	-0.294079	0.00664864	0.0113297	0.840878	0.0229495	0.0391647	0.996525	Y	N	N	0	0	NA	NA	NA
chr13_47297356_47303119	6.4878	6.24809	-0.239714	0.00053973	0.000919503	0.871856	0.00398635	0.00680547	1	Y	Y	N	0	0	NA	NA	NA
chr13_50279757_50280508	1.73756	2.01174	0.274179	0.0066301	0.00180406	0.654788	0.0229302	0.0114809	0.885532	Y	N	N	0	0	NA	NA	NA
chr13_51893807_51894187	-7.29071	-6.57506	0	0.000107666	0.000478517	1	0.00106211	0.00403013	1	Y	Y	N	0	0	NA	NA	NA
chr13_52992127_53001354	2.21526	2.29692	0.0816559	7.57328e-06	4.75334e-06	0.856485	0.000106221	7.0435e-05	1	Y	Y	N	0	0	NA	NA	NA
chr13_60485869_60490383	-6.60656	-5.89092	0	0.00136865	0.00431154	1	0.00818716	0.0224384	1	Y	N	N	0	0	NA	NA	NA
chr13_64793357_64819610	-6.64151	-0.494357	6.14715	3.31743e-05	0.65969	0.000141704	0.000393591	0.80354	0.00190942	Y	N	N	0	0	NA	NA	NA
chr13_75930283_75936743	6.49698	0	-5.79744	0.00230635	1	0.00653816	0.0117187	1	0.0392445	Y	N	N	0	0	NA	NA	NA
chr13_76195899_76301234	0.336918	3.04172	2.7048	0.586449	2.79817e-07	3.34026e-06	0.74508	5.28518e-06	7.84491e-05	N	Y	Y	0	0	NA	NA	NA
chr13_80094945_80113910	-1.96339	-1.77195	0.19144	0.00141696	0.00471253	0.767135	0.00838153	0.0238779	0.96032	Y	Y	N	0	0	NA	NA	NA
chr13_88099351_88163725	-6.00816	-5.29251	0	0.00291357	0.00873767	1	0.0129791	0.0345362	NA	Y	N	N	0	0	NA	NA	NA
chr13_95813443_95818621	1.57224	2.35279	0.780545	0.00367664	1.33567e-05	0.116608	0.0145913	0.000178165	0.300763	N	Y	N	0	0	NA	NA	NA
chr13_96636058_96651561	-2.05446	0.230893	2.28536	4.90896e-10	0.450807	7.18081e-12	1.60231e-08	0.63446	5.84098e-10	Y	N	Y	0	0	NA	NA	NA
chr13_96637493_96648389	-1.44851	-1.28634	0.162167	0.000107139	0.000707407	0.675719	0.00106135	0.00554266	0.898534	Y	Y	N	0	0	NA	NA	NA
chr13_96665561_96684225	-3.77708	-0.748977	3.02811	0.000297409	0.433041	0.00419327	0.00247677	0.61917	0.0285691	N	N	N	0	0	NA	NA	NA
chr13_96837104_96840751	-7.13966	-6.42402	0	0.000254466	0.000997995	1	0.00218736	0.00730248	1	Y	Y	N	0	0	NA	NA	NA
chr13_98865474_98865667	0.837977	2.44545	1.60747	0.0469893	4.26712e-09	7.70051e-05	0.117027	1.14485e-07	0.00116468	N	Y	Y	0	0	NA	NA	NA
chr13_99549742_99556960	6.4617	3.97543	-2.48627	2.9251e-06	0.00500695	0.0114459	4.53237e-05	0.02501	0.0599717	Y	N	N	0	0	NA	NA	NA
chr13_99890681_99896878	-0.868113	1.16851	2.03662	0.0217464	0.00145098	5.80386e-08	0.0637805	0.00965001	2.14359e-06	N	N	Y	0	0	NA	NA	NA
chr14_102506573_102507010	0.555366	-1.07457	-1.62993	0.153346	0.00951743	7.46192e-05	0.30769	0.0358765	0.00113374	N	N	Y	0	0	NA	NA	NA
chr14_103465902_103478525	-1.58404	-6.54856	-4.96451	0.246918	0.000243406	0.00577195	0.433011	0.00225605	0.0358129	N	Y	N	0	0	NA	NA	NA
chr14_103470265_103478525	-0.842898	-3.28266	-2.43977	0.0777626	8.01583e-10	5.57849e-06	0.180233	2.51222e-08	0.000125705	N	N	N	0	0	NA	NA	NA
chr14_104433046_104436958	-6.75317	-6.03752	0	0.000933861	0.00308646	1	0.00617028	0.0175031	1	Y	Y	N	0	0	NA	NA	NA
chr14_104624092_104633385	-6.12907	-5.41342	0	0.00276338	0.0082067	1	0.0128118	0.0337954	NA	Y	Y	N	0	0	NA	NA	NA
chr14_31605737_31626092	-5.7795	-5.06385	0	0.00284658	0.00893933	1	0.0128744	0.0348472	NA	Y	N	N	0	0	NA	NA	NA
chr14_31637504_31638674	-7.09972	-0.551611	6.54811	5.66836e-05	0.679967	0.000223661	0.000625374	0.817831	0.00281475	Y	N	N	0	0	NA	NA	NA
chr14_31765115_31771725	-1.22104	-6.2195	-4.99846	0.419363	0.00104884	0.00882122	0.611434	0.00758052	0.0492364	N	Y	N	0	0	NA	NA	NA
chr14_31775938_31778388	-6.4623	-5.74666	0	0.00175965	0.00540827	1	0.00982934	0.0262555	1	Y	Y	N	0	0	NA	NA	NA
chr14_31841016_31844174	-8.19214	-5.01872	3.17342	1.20767e-07	0.000115821	0.0700952	2.4866e-06	0.00119761	0.211077	Y	Y	N	0	0	NA	NA	NA
chr14_32902666_32903023	-6.68066	-0.0268246	6.65383	0.000260877	0.984948	0.000290617	0.00223975	1	0.00349264	Y	N	Y	0	0	NA	NA	NA
chr14_35044962_35078948	-6.52041	-5.80476	0	0.00157989	0.004911	1	0.00906838	0.0246001	1	Y	Y	N	0	0	NA	NA	NA
chr14_35276657_35331528	-6.75368	-6.03804	0	0.00124524	0.0038989	1	0.00766293	0.0209162	1	Y	Y	N	0	0	NA	NA	NA
chr14_37709638_37717112	-6.04456	-5.32892	0	0.00290173	0.00865506	1	0.0129606	0.034477	NA	Y	N	N	0	0	NA	NA	NA
chr14_37838722_37892154	-7.38678	-6.67113	0	6.15396e-05	0.000296155	1	0.000668535	0.00266879	1	Y	Y	N	0	0	NA	NA	NA
chr14_37969113_37969343	-7.15092	-6.43527	0	0.000528217	0.00181371	1	0.00393414	0.0115215	1	Y	Y	N	0	0	NA	NA	NA
chr14_39562391_39565343	-6.08944	0.0244431	6.11388	0.00173443	0.98762	0.00174183	0.00972684	1	0.0148598	Y	N	N	0	0	NA	NA	NA
chr14_39815108_39818181	-6.62067	-5.90503	0	0.00288343	0.00786536	1	0.012918	0.0331018	1	Y	Y	N	0	0	NA	NA	NA
chr14_45618040_45628483	-7.10999	-6.39434	0	0.000307517	0.00117188	1	0.00254753	0.00827728	1	Y	Y	N	0	0	NA	NA	NA
chr14_45705017_45706924	-8.26297	-4.10044	4.16254	3.23253e-07	0.00108079	0.0153517	6.18811e-06	0.00772473	0.0743617	Y	Y	N	0	0	NA	NA	NA
chr14_50120708_50122529	-6.36391	-1.18707	5.17684	0.000758335	0.439196	0.00708742	0.00525566	0.624789	0.0416137	Y	N	N	0	0	NA	NA	NA
chr14_50130033_50141145	-1.33383	-0.340365	0.993464	1.23577e-09	0.116066	1.15273e-05	3.89022e-08	0.247099	0.000230201	Y	N	N	0	0	NA	NA	NA
chr14_50136242_50141145	-2.39045	-0.108176	2.28227	0.000976062	0.87841	0.00173885	0.00636597	0.952361	0.0148598	N	N	N	0	0	NA	NA	NA
chr14_50647290_50655418	-5.88182	-5.16618	0	0.00319624	0.00961164	1	0.0135221	0.035966	NA	Y	N	N	0	0	NA	NA	NA
chr14_50666409_50671127	-2.15963	-7.27814	-5.11851	0.0604905	7.63154e-06	0.00182545	0.145387	0.000107893	0.0154124	N	Y	N	0	0	NA	NA	NA
chr14_50933301_50943024	-5.79079	-5.07514	0	0.00418026	0.0120643	1	0.015876	0.0410232	NA	N	N	N	0	0	NA	NA	NA
chr14_51259430_51288795	0.772692	-5.24553	-6.01823	0.629434	0.00803443	0.00228008	0.775758	0.033574	0.0181189	N	N	N	0	0	NA	NA	NA
chr14_53327059_53340944	-5.8179	-5.10225	0	0.00319936	0.00972968	1	0.0135221	0.0361191	NA	Y	N	N	0	0	NA	NA	NA
chr14_53539315_53570574	-6.23492	-5.51928	0	0.00346889	0.00967229	1	0.0141056	0.0360755	1	Y	Y	N	0	0	NA	NA	NA
chr14_53558503_53570574	-7.43845	-4.8623	2.57615	1.59872e-05	0.0026815	0.197094	0.000204769	0.0155937	0.428749	Y	Y	N	0	0	NA	NA	NA
chr14_55462321_55467710	-5.88384	0.56346	6.4473	0.00297201	0.727085	0.00114418	0.0130831	0.850929	0.0106737	Y	N	N	0	0	NA	NA	NA
chr14_56746394_56757174	-5.96546	-5.24982	0	0.00410812	0.0115543	1	0.0156631	0.0396574	NA	Y	N	N	0	0	NA	NA	NA
chr14_61482622_61512885	-8.83415	-8.11851	0	1.62115e-10	4.21354e-09	1	5.68445e-09	1.13477e-07	1	Y	Y	N	0	0	NA	NA	NA
chr14_66028055_66028484	1.019	0.816075	-0.20293	1.24127e-11	1.10563e-07	0.175508	5.29999e-10	2.26991e-06	0.396693	N	N	N	0	0	NA	NA	NA
chr14_68151732_68157138	-0.509362	-7.05578	-6.54641	0.42428	1.13023e-07	9.03475e-07	0.616067	2.31371e-06	2.47991e-05	N	Y	Y	0	0	NA	NA	NA
chr14_69583083_69589077	0.0898865	-1.31242	-1.4023	0.799117	0.0006002	0.000240114	0.89165	0.00484193	0.00296666	N	N	Y	0	0	NA	NA	NA
chr14_69670634_69676918	-6.00023	-0.857367	5.14287	0.00162326	0.580936	0.00783218	0.00924241	0.743395	0.0447649	Y	N	N	0	0	NA	NA	NA
chr14_69919958_69922583	-6.53197	-0.618345	5.91363	0.000679245	0.690452	0.00228185	0.00480629	0.825396	0.0181189	Y	N	N	0	0	NA	NA	NA
chr14_71867511_71884913	-8.4198	-4.50564	3.91416	2.84355e-08	9.0223e-05	0.0172273	6.75868e-07	0.00097714	0.0807491	Y	Y	N	0	0	NA	NA	NA
chr14_71880665_71933964	-2.61876	-2.28447	0.334289	3.20787e-09	4.67481e-07	0.488507	9.46724e-08	8.42537e-06	0.757655	Y	Y	N	0	0	NA	NA	NA
chr14_71880665_71996087	-1.95329	-2.14575	-0.192465	1.67175e-14	1.01453e-15	0.48838	1.03868e-12	7.25849e-14	0.757655	Y	Y	N	0	0	NA	NA	NA
chr14_71880665_72043304	-2.17936	-6.49859	-4.31923	0.0369277	2.36514e-05	0.00581785	0.0954247	0.000295977	0.0359639	Y	N	N	0	0	NA	NA	NA
chr14_74557935_74567941	1.71857	-0.322999	-2.04157	0.0115336	0.662356	0.00437014	0.0370488	0.80553	0.029138	Y	N	N	0	0	NA	NA	NA
chr14_76184204_76187046	0.857324	-5.30584	-6.16316	0.435624	0.0009228	0.000109503	0.627011	0.00681563	0.00157751	N	N	Y	0	0	NA	NA	NA
chr14_76633006_76662315	1.44892	-0.17419	-1.62311	0.0012214	0.717712	0.000516562	0.00754285	0.844865	0.00569499	Y	N	Y	0	0	NA	NA	NA
chr14_80944597_80997230	-5.83466	-5.11901	0	0.0033232	0.00999463	1	0.0137731	0.0365214	NA	Y	N	N	0	0	NA	NA	NA
chr14_84112888_84132553	-9.33651	-8.62087	0	8.03164e-13	3.79796e-11	1	4.12233e-11	1.52846e-09	1	Y	Y	N	0	0	NA	NA	NA
chr14_91444650_91467503	0.830953	-4.33429	-5.16524	0.0722785	5.65579e-09	3.09818e-12	0.169127	1.44461e-07	2.8308e-10	N	Y	Y	0	0	NA	NA	NA
chr14_93730131_93730339	-6.97156	-6.25592	0	0.00140925	0.00416999	1	0.00837394	0.0218947	1	Y	Y	N	0	0	NA	NA	NA
chr14_97299804_97327072	-6.07384	-5.3582	0	0.00285846	0.00850975	1	0.0128858	0.0342859	NA	Y	N	N	0	0	NA	NA	NA
chr14_99723808_99724173	0	7.27527	7.29139	1	0.00614615	0.00603399	1	0.0287918	0.0367886	N	Y	Y	0	0	NA	NA	NA
chr15_100692817_100871259	7.51821	0	-6.81867	2.47015e-05	1	0.000130735	0.000303724	1	0.00178758	Y	N	Y	0	0	NA	NA	NA
chr15_100739523_100871259	8.50144	0	-7.80189	1.03411e-09	1	2.12185e-08	3.29937e-08	1	8.22834e-07	Y	N	Y	0	0	NA	NA	NA
chr15_100794341_100871259	9.33429	0	-8.63475	4.43478e-13	1	2.10062e-11	2.32678e-11	1	1.49055e-09	Y	N	Y	0	0	NA	NA	NA
chr15_100871094_100874385	7.61973	0	-6.9202	9.90637e-05	1	0.000407055	0.000996124	1	0.00466504	Y	N	Y	0	0	NA	NA	NA
chr15_101775287_101775782	0.294256	-2.01707	-2.31132	0.422317	4.96383e-06	1.44222e-07	0.61435	7.34004e-05	4.88306e-06	N	Y	Y	0	0	NA	NA	NA
chr15_32498465_32500399	-5.87267	-5.15702	0	0.00281562	0.00871174	1	0.0128554	0.0345108	NA	N	N	N	0	0	NA	NA	NA
chr15_33149216_33194241	7.03518	5.56336	-1.47182	0.00143091	0.0125763	0.438604	0.00844162	0.0422172	0.710698	Y	N	N	0	0	NA	NA	NA
chr15_33180373_33194241	7.27026	5.74885	-1.52141	2.7117e-05	0.00107642	0.247108	0.00032945	0.00770127	0.494512	Y	N	N	0	0	NA	NA	NA
chr15_35207239_35219339	-2.57251	-0.442953	2.12955	0.000786635	0.550066	0.00595089	0.00541471	0.718739	0.036482	N	N	N	0	0	NA	NA	NA
chr15_35224519_35231014	-6.5115	-0.596598	5.9149	0.000579702	0.693792	0.0019389	0.00418983	0.827727	0.0161052	Y	N	N	0	0	NA	NA	NA
chr15_42553156_42560230	-1.47922	-0.526471	0.952744	1.82474e-06	0.0857218	0.00301613	2.96436e-05	0.196749	0.0224527	Y	N	N	0	0	NA	NA	NA
chr15_44134613_44136252	-6.47843	-0.76621	5.71222	0.00132365	0.647126	0.00502859	0.00798588	0.794384	0.0323067	Y	N	N	0	0	NA	NA	NA
chr15_48888480_48905289	-7.54646	-6.83081	0	1.94221e-05	0.000110469	1	0.000245217	0.00115406	1	Y	Y	N	0	0	NA	NA	NA
chr15_49880213_49882204	-7.13837	-6.42273	0	0.000227134	0.000909426	1	0.00199602	0.00675206	1	Y	Y	N	0	0	NA	NA	NA
chr15_50330965_50339661	-7.61574	-6.9001	0	1.15631e-05	7.08091e-05	1	0.000154823	0.000789107	1	Y	Y	N	0	0	NA	NA	NA
chr15_50330965_50366382	-3.84147	-7.19804	-3.35658	0.0130822	0.000136018	0.0837823	0.0411826	0.00137434	0.24077	N	Y	N	0	0	NA	NA	NA
chr15_50330965_50399205	-7.39197	-1.89606	5.49591	1.49102e-05	0.141609	0.00158923	0.000194409	0.286741	0.0138746	Y	N	N	0	0	NA	NA	NA
chr15_55619729_55626205	-6.46538	-5.74974	0	0.00203418	0.00607511	1	0.0107905	0.0286036	1	Y	Y	N	0	0	NA	NA	NA
chr15_56216844_56258744	-7.14974	-6.4341	0	0.000319021	0.00119919	1	0.00261531	0.00838485	1	Y	Y	N	0	0	NA	NA	NA
chr15_56993131_56999504	-6.17231	-5.45667	0	0.00411094	0.0111865	1	0.0156631	0.0388213	1	Y	Y	N	0	0	NA	NA	NA
chr15_59470592_59480415	-7.9041	-1.37139	6.53271	4.19809e-09	0.0497813	1.67083e-06	1.21865e-07	0.128402	4.2536e-05	Y	N	Y	0	0	NA	NA	NA
chr15_62871704_62881961	-6.28731	-5.57167	0	0.00261048	0.00763956	1	0.0125101	0.032597	1	Y	Y	N	0	0	NA	NA	NA
chr15_62966026_62978995	-5.91364	-5.198	0	0.00281776	0.00865263	1	0.0128554	0.034477	NA	Y	N	N	0	0	NA	NA	NA
chr15_65804633_65808129	-6.27979	-0.80916	5.47063	0.00133268	0.614573	0.0057293	0.00801987	0.768	0.0356146	Y	N	N	0	0	NA	NA	NA
chr15_67873092_67893087	0.0924434	-5.54889	-5.64133	0.954341	0.00522864	0.00450603	0.986082	0.0257422	0.0297577	N	Y	N	0	0	NA	NA	NA
chr15_67956935_68040939	-7.26712	-6.55148	0	0.000112816	0.000499562	1	0.00110676	0.00417264	1	Y	Y	N	0	0	NA	NA	NA
chr15_69728477_69729061	1.37636	1.41817	0.0418132	3.377e-09	2.83389e-09	0.850726	9.88399e-08	8.02897e-08	1	Y	Y	N	0	0	NA	NA	NA
chr15_71174814_71175247	-5.82946	-5.11381	0	0.00277801	0.0086886	1	0.0128418	0.034477	NA	Y	N	N	0	0	NA	NA	NA
chr15_72300167_72320134	-0.111055	-1.4533	-1.34224	0.745807	0.00014369	0.000458144	0.858812	0.00143955	0.00514952	N	N	N	0	0	NA	NA	NA
chr15_72810408_72848248	-1.24917	0.282392	1.53156	0.000577646	0.419487	3.02712e-05	0.00417923	0.607116	0.000513764	Y	N	Y	0	0	NA	NA	NA
chr15_72837161_72855841	-5.81415	-5.09851	0	0.00348018	0.0104022	1	0.0141261	0.0373398	NA	Y	N	N	0	0	NA	NA	NA
chr15_72837161_72864506	-0.702901	-3.36972	-2.66681	0.0438005	7.30068e-13	1.83842e-08	0.110092	3.80226e-11	7.25577e-07	N	Y	Y	0	0	NA	NA	NA
chr15_72847612_72864506	-7.1816	-6.46596	0	0.000176056	0.000731984	1	0.00161112	0.00571626	1	Y	Y	N	0	0	NA	NA	NA
chr15_76566753_76578822	-6.03407	-5.31843	0	0.0029532	0.00879245	1	0.0130571	0.0345983	NA	Y	Y	N	0	0	NA	NA	NA
chr15_76580187_76588078	-6.08051	-5.36487	0	0.00292393	0.00865449	1	0.0129797	0.034477	NA	Y	Y	N	0	0	NA	NA	NA
chr15_80762559_80767564	0	6.55505	6.57116	1	0.00156673	0.00152554	1	0.0102847	0.0134594	N	Y	Y	0	0	NA	NA	NA
chr15_81199004_81201647	0	6.88103	6.89714	1	0.000802536	0.000780143	1	0.0061188	0.00790813	N	Y	Y	0	0	NA	NA	NA
chr15_83301923_83310433	-6.93329	-6.21765	0	0.000542562	0.00192348	1	0.00400309	0.0120247	1	Y	Y	N	0	0	NA	NA	NA
chr15_86182605_86189185	-6.25744	-5.54179	0	0.00243911	0.00727095	1	0.0121236	0.0318098	1	Y	Y	N	0	0	NA	NA	NA
chr15_89656956_89698765	2.69631	3.24082	0.544516	8.47563e-06	9.26368e-08	0.318453	0.000117481	1.92984e-06	0.582675	Y	Y	N	0	0	NA	NA	NA
chr15_90984738_90986710	-0.490328	-3.67649	-3.18616	0.573287	0.000580382	0.00296195	0.733826	0.00471428	0.022074	N	Y	N	0	0	NA	NA	NA
chr15_94039463_94041986	0	6.67532	6.69143	1	0.0014509	0.00141294	1	0.00965001	0.0126841	N	Y	Y	0	0	NA	NA	NA
chr15_94927251_94945248	-6.13164	-5.416	0	0.00327042	0.00938118	1	0.0136834	0.0356093	NA	Y	Y	N	0	0	NA	NA	NA
chr15_94942190_94945248	-7.21679	-2.04075	5.17605	3.36858e-05	0.129535	0.00366962	0.00039899	0.268982	0.0259009	Y	N	N	0	0	NA	NA	NA
chr15_99250791_99251336	-1.29925	-1.1607	0.138547	1.64501e-06	3.43598e-05	0.633735	2.69713e-05	0.000412492	0.871948	Y	Y	N	0	0	NA	NA	NA
chr16_11791981_11815526	-5.88231	-5.16667	0	0.00396212	0.0113855	1	0.0152437	0.0392808	NA	Y	N	N	0	0	NA	NA	NA
chr16_11827838_11830089	-5.90919	-5.19355	0	0.00376122	0.0108774	1	0.0147922	0.0382355	NA	Y	N	N	0	0	NA	NA	NA
chr16_142594_143323	-5.51416	1.12276	6.63692	0.00548033	0.487614	0.000802609	0.0194865	0.667008	0.00801583	N	N	N	0	0	NA	NA	NA
chr16_148143_150507	-1.71319	2.52306	4.23625	0.0871788	0.00616936	1.62787e-05	0.197814	0.0288814	0.000304998	N	Y	N	0	0	NA	NA	NA
chr16_15577794_15609285	-6.63649	-5.92085	0	0.00142867	0.00444207	1	0.00843975	0.0229783	1	Y	Y	N	0	0	NA	NA	NA
chr16_15973661_15978062	-2.0497	-2.61538	-0.565686	6.95817e-08	9.40343e-11	0.173748	1.50718e-06	3.54279e-09	0.394847	Y	Y	N	0	0	NA	NA	NA
chr16_16101673_16110478	-2.26762	-2.31978	-0.0521581	2.20367e-12	3.71242e-11	0.890667	1.06181e-10	1.50258e-09	1	Y	Y	N	0	0	NA	NA	NA
chr16_16108348_16110478	-6.92037	-1.28178	5.6386	0.000127075	0.364524	0.00207861	0.00121304	0.55418	0.0169344	Y	N	N	0	0	NA	NA	NA
chr16_1682213_1691188	-6.21701	-5.50137	0	0.00478371	0.0125428	1	0.0176016	0.0421645	1	Y	Y	N	0	0	NA	NA	NA
chr16_21623966_21636436	0.107202	-2.26616	-2.37336	0.849409	0.000326458	0.000164768	0.92403	0.00291589	0.00215491	N	N	N	0	0	NA	NA	NA
chr16_21979949_21987564	0.106114	1.54284	1.43672	0.829673	0.00128334	0.00254223	0.910391	0.00885091	0.0197326	N	N	N	0	0	NA	NA	NA
chr16_22360600_22361170	-6.05045	-0.654376	5.39608	0.00203082	0.685119	0.00651929	0.0107905	0.821037	0.0392126	Y	N	N	0	0	NA	NA	NA
chr16_23424769_23428442	-6.29699	-1.12216	5.17483	0.00105585	0.476149	0.00810048	0.00678637	0.656268	0.0460028	Y	N	N	0	0	NA	NA	NA
chr16_23654276_23672602	-6.49495	0.46092	6.95587	0.000396078	0.74592	0.000150769	0.00312408	0.863203	0.00201125	Y	N	N	0	0	NA	NA	NA
chr16_24979672_24981901	-0.707448	-5.91596	-5.20851	0.646383	0.00210986	0.0069752	0.787737	0.0129357	0.0411358	N	Y	N	0	0	NA	NA	NA
chr16_2498856_2499916	-5.82791	-0.426233	5.40168	0.00272899	0.789173	0.00598055	0.0127271	0.891367	0.036563	Y	N	N	0	0	NA	NA	NA
chr16_25162875_25170279	-5.7724	-5.05676	0	0.00319929	0.00981046	1	0.0135221	0.036248	NA	Y	N	N	0	0	NA	NA	NA
chr16_27224906_27226329	-0.634207	-0.799724	-0.165517	0.00648365	0.00119362	0.511841	0.0225116	0.00836243	0.776258	N	N	N	0	0	NA	NA	NA
chr16_28112779_28113266	-2.20874	0.159723	2.36846	1.07594e-08	0.659061	1.21447e-09	2.83303e-07	0.802912	6.09059e-08	Y	N	Y	0	0	NA	NA	NA
chr16_28157415_28181230	-6.06144	0.56063	6.62207	0.000185626	0.623606	4.52196e-05	0.00168996	0.775409	0.000730302	Y	N	Y	0	0	NA	NA	NA
chr16_28970038_28970421	-5.94274	-0.0329174	5.90982	0.00471582	0.985175	0.00515433	0.017406	1	0.0327735	Y	N	N	0	0	NA	NA	NA
chr16_29323671_29339945	1.42963	5.47246	4.04283	0.22248	8.57858e-07	4.21842e-05	0.401997	1.482e-05	0.000682934	N	Y	Y	0	0	NA	NA	NA
chr16_29917109_29917448	5.03834	-0.73583	-5.77417	0.00215068	0.670128	0.000667063	0.0111927	0.810955	0.00697384	Y	N	Y	0	0	NA	NA	NA
chr16_4029117_4033441	-1.77474	-1.31876	0.45598	7.19177e-05	0.00363562	0.337917	0.000769475	0.0198202	0.605383	Y	N	N	0	0	NA	NA	NA
chr16_47531310_47581459	-0.192637	-0.785504	-0.592867	0.359072	0.000492669	0.0088824	0.555914	0.00411992	0.0493754	N	N	N	0	0	NA	NA	NA
chr16_53301206_53302038	-6.33974	-0.153179	6.18656	0.00149354	0.925482	0.0020387	0.00869246	0.981547	0.0167116	Y	N	N	0	0	NA	NA	NA
chr16_56900982_56902284	-7.41526	-6.69962	0	7.2684e-05	0.000337802	1	0.000776502	0.00299831	1	Y	Y	N	0	0	NA	NA	NA
chr16_56900985_56902284	-6.56146	-5.84582	0	0.00183705	0.00551003	1	0.010118	0.0266301	1	Y	Y	N	0	0	NA	NA	NA
chr16_56906263_56906698	-7.33615	-6.62051	0	9.83937e-05	0.000440403	1	0.000992767	0.00376943	1	Y	Y	N	0	0	NA	NA	NA
chr16_66562897_66575856	-6.78138	-1.00796	5.77342	0.000520818	0.527527	0.00345409	0.00389131	0.701533	0.0247995	Y	N	N	0	0	NA	NA	NA
chr16_66632081_66632743	0	6.7983	6.81441	1	0.001042	0.00101375	1	0.00754654	0.00971511	N	Y	Y	0	0	NA	NA	NA
chr16_66655965_66657405	0	8.02807	8.04417	1	1.92877e-07	1.8234e-07	1	3.7635e-06	5.99118e-06	N	Y	Y	0	0	NA	NA	NA
chr16_67662273_67663436	0.719877	2.1962	1.47632	0.0951276	2.31827e-07	0.000358007	0.211087	4.44995e-06	0.00417466	N	Y	Y	0	0	NA	NA	NA
chr16_68090267_68105011	0	7.37525	7.39135	1	0.000107131	0.000103479	1	0.00112246	0.00150527	N	Y	Y	0	0	NA	NA	NA
chr16_68300496_68309152	0.0479595	1.56996	1.522	0.875348	1.73162e-07	3.86109e-07	0.938618	3.41646e-06	1.16007e-05	N	Y	Y	0	0	NA	NA	NA
chr16_68308594_68309152	0.877249	2.64924	1.77199	0.212852	0.000114654	0.00701603	0.388664	0.00118901	0.0413401	N	Y	N	0	0	NA	NA	NA
chr16_69170599_69177292	0	7.59877	7.61487	1	1.95598e-05	1.87831e-05	1	0.000252353	0.000344184	N	Y	Y	0	0	NA	NA	NA
chr16_69729039_69729282	1.72786	0.448936	-1.27892	4.9535e-07	0.215662	0.000235454	9.20883e-06	0.38928	0.00292454	Y	N	Y	0	0	NA	NA	NA
chr16_70346512_70350007	0	7.46148	7.47758	1	3.01137e-05	2.89476e-05	1	0.000367117	0.000497087	N	Y	Y	0	0	NA	NA	NA
chr16_70548238_70551643	0	7.26769	7.2838	1	0.000151796	0.000146761	1	0.00150255	0.00196566	N	Y	Y	0	0	NA	NA	NA
chr16_70765398_70778482	0	7.00052	7.01662	1	0.000799927	0.000777972	1	0.0061188	0.00789814	N	Y	Y	0	0	NA	NA	NA
chr16_71748415_71748704	-6.76915	-0.576958	6.19219	0.00047545	0.712426	0.00149625	0.00360558	0.840459	0.013289	Y	N	N	0	0	NA	NA	NA
chr16_72122886_72124685	-0.160116	2.0618	2.22192	0.802203	0.00084657	0.000346703	0.892828	0.0063587	0.00407132	N	Y	Y	0	0	NA	NA	NA
chr16_7898762_7901929	-7.52511	-6.80947	0	2.22669e-05	0.000124269	1	0.000277182	0.00127031	1	Y	Y	N	0	0	NA	NA	NA
chr16_7926082_7944397	-7.95105	-7.23541	0	3.21296e-07	3.31083e-06	1	6.16731e-06	5.073e-05	1	Y	Y	N	0	0	NA	NA	NA
chr16_7929541_7944397	-6.00581	-5.29017	0	0.00286976	0.00863691	1	0.0128894	0.034477	NA	Y	N	N	0	0	NA	NA	NA
chr16_85810161_85814886	6.69378	6.28604	-0.407743	0.000526155	0.00120572	0.793175	0.0039229	0.00841392	0.973767	Y	N	N	0	0	NA	NA	NA
chr16_89371614_89379997	-5.70312	1.32208	7.02519	0.00284109	0.384557	0.000224918	0.0128744	0.573194	0.00281994	Y	N	Y	0	0	NA	NA	NA
chr16_89484692_89493477	-7.63801	0.0801798	7.71819	1.60286e-08	0.906824	1.24453e-08	4.01168e-07	0.969744	5.15593e-07	Y	N	Y	0	0	NA	NA	NA
chr16_929570_961079	-5.58263	1.39384	6.97647	0.000498743	0.209383	1.20541e-05	0.00374215	0.381152	0.000238578	N	N	Y	0	0	NA	NA	NA
chr16_981642_1004666	6.01929	6.22693	0.20764	0.0124258	0.00986064	0.921959	0.0394672	0.0363198	1	N	N	N	0	0	NA	NA	NA
chr17_11958206_11999011	-8.21227	-7.49662	0	3.49158e-08	4.7977e-07	1	8.05564e-07	8.6249e-06	1	Y	Y	N	0	0	NA	NA	NA
chr17_11958206_12016677	-8.006	-7.29035	0	7.64318e-07	6.72205e-06	1	1.34334e-05	9.58735e-05	1	Y	Y	N	0	0	NA	NA	NA
chr17_11984673_11999011	-7.68369	-6.96805	0	4.79303e-06	3.35878e-05	1	6.99979e-05	0.000403909	1	Y	Y	N	0	0	NA	NA	NA
chr17_11984673_12016677	-5.91957	-5.20392	0	0.00292343	0.00889837	1	0.0129797	0.0347846	NA	Y	N	N	0	0	NA	NA	NA
chr17_11998892_12016677	-8.72821	-8.01256	0	2.14066e-10	5.53703e-09	1	7.39624e-09	1.42097e-07	1	Y	Y	N	0	0	NA	NA	NA
chr17_12011107_12016677	-7.85077	-7.13513	0	1.62411e-06	1.31135e-05	1	2.66905e-05	0.000175582	1	Y	Y	N	0	0	NA	NA	NA
chr17_15449099_15458678	-0.762431	-6.79484	-6.03241	0.353981	1.84051e-06	2.4413e-05	0.550927	2.96281e-05	0.000430779	N	Y	Y	0	0	NA	NA	NA
chr17_15843339_15843741	-6.97692	-6.26127	0	0.000758204	0.00250951	1	0.00525566	0.0148124	1	Y	Y	N	0	0	NA	NA	NA
chr17_15881114_15890682	-6.12047	-5.40483	0	0.00374011	0.0104586	1	0.0147507	0.0373944	NA	Y	Y	N	0	0	NA	NA	NA
chr17_17045941_17046983	3.67621	4.34931	0.673104	0.00688459	0.00139419	0.539238	0.0236831	0.00940481	0.800092	N	Y	N	0	0	NA	NA	NA
chr17_1746097_1756483	-0.682498	-0.0534965	0.629002	0.000530819	0.787172	0.00215547	0.00394373	0.890234	0.0173635	N	N	N	0	0	NA	NA	NA
chr17_18210205_18212255	-5.9256	-5.20995	0	0.00349632	0.0102387	1	0.0141796	0.0370384	NA	N	N	N	0	0	NA	NA	NA
chr17_18634383_18635447	-7.65588	-6.94024	0	2.01529e-05	0.000111233	1	0.000252642	0.00115897	1	Y	Y	N	0	0	NA	NA	NA
chr17_18768782_18775962	-5.9127	-0.516653	5.39605	0.00244426	0.747102	0.00622972	0.0121407	0.863801	0.0377748	Y	N	N	0	0	NA	NA	NA
chr17_19445706_19451446	-6.30626	-5.59061	0	0.00227983	0.00683286	1	0.0116837	0.0308458	1	Y	Y	N	0	0	NA	NA	NA
chr17_19445706_19452990	-6.41914	-5.70349	0	0.00274741	0.00779534	1	0.0127773	0.0329408	1	Y	Y	N	0	0	NA	NA	NA
chr17_19445706_19454781	-6.93609	-6.22045	0	0.000549343	0.00194213	1	0.00403212	0.0121199	1	Y	Y	N	0	0	NA	NA	NA
chr17_19843026_19850818	-6.78424	-0.94839	5.83585	0.000349836	0.533651	0.00233129	0.00283264	0.706382	0.0184456	Y	N	N	0	0	NA	NA	NA
chr17_19921300_20013875	-6.17438	0.989239	7.16362	8.98358e-05	0.35439	5.29315e-06	0.000923127	0.545447	0.000120086	Y	N	Y	0	0	NA	NA	NA
chr17_19999944_20013875	-6.39966	0.954907	7.35457	7.304e-06	0.249175	2.42904e-07	0.000103262	0.431306	7.71509e-06	Y	N	Y	0	0	NA	NA	NA
chr17_2075952_2076153	-6.12818	-5.41254	0	0.00284304	0.00839578	1	0.0128744	0.0342239	NA	Y	Y	N	0	0	NA	NA	NA
chr17_20922397_20931987	-5.97223	-5.25658	0	0.0046201	0.0126672	1	0.017178	0.0425019	NA	Y	Y	N	0	0	NA	NA	NA
chr17_26685939_26687870	-6.3869	-5.67126	0	0.00216901	0.00647878	1	0.0112673	0.0297982	1	Y	Y	N	0	0	NA	NA	NA
chr17_28011581_28030080	-1.76535	-1.59396	0.171393	4.09322e-08	2.00076e-06	0.629444	9.26271e-07	3.19896e-05	0.868693	Y	Y	N	0	0	NA	NA	NA
chr17_29483001_29491097	-7.01022	-6.29458	0	0.000422168	0.0015461	1	0.00327652	0.0101681	1	Y	Y	N	0	0	NA	NA	NA
chr17_29483001_29497015	-1.32857	-1.52239	-0.193823	3.62219e-06	2.84556e-07	0.522436	5.52931e-05	5.36039e-06	0.785009	Y	Y	N	0	0	NA	NA	NA
chr17_30310018_30315516	1.73368	1.38646	-0.347223	5.77297e-05	0.00157325	0.410626	0.000635175	0.0103083	0.685062	Y	N	N	0	0	NA	NA	NA
chr17_34864736_34867294	-5.88745	-5.17181	0	0.00381294	0.0110362	1	0.0148964	0.0384817	NA	Y	N	N	0	0	NA	NA	NA
chr17_34869272_34871833	0.10916	-5.5088	-5.61796	0.921523	0.000587519	0.000451049	0.96584	0.00476132	0.00508192	N	Y	N	0	0	NA	NA	NA
chr17_34910661_34923615	1.36448	0.220173	-1.14431	4.87775e-05	0.542055	0.000942117	0.000547529	0.713241	0.0091736	Y	N	Y	0	0	NA	NA	NA
chr17_35343916_35348156	1.80625	1.15967	-0.646585	6.83201e-06	0.00472659	0.102385	9.73664e-05	0.0239299	0.275254	Y	N	N	0	0	NA	NA	NA
chr17_41201138_41209152	6.95477	6.30616	-0.648608	0.000381446	0.00136672	0.682982	0.00304598	0.00929025	0.902256	N	Y	N	0	0	NA	NA	NA
chr17_41576230_41577471	1.0729	1.06778	-0.00512558	0.00200486	0.00266309	0.988011	0.0106761	0.0155419	1	Y	N	N	0	0	NA	NA	NA
chr17_43111303_43268537	-5.96412	-5.24848	0	0.00303941	0.00910457	1	0.01324	0.0350609	NA	Y	N	N	0	0	NA	NA	NA
chr17_43552466_43553092	1.24622	0.468761	-0.777458	1.23645e-05	0.112012	0.00682727	0.00016462	0.240347	0.0406226	Y	N	N	0	0	NA	NA	NA
chr17_44143903_44172067	0.230167	-0.882419	-1.11259	0.147208	3.30937e-07	9.59807e-11	0.298162	6.16849e-06	5.76749e-09	N	N	Y	0	0	NA	NA	NA
chr17_44159807_44172067	0.340712	-1.4421	-1.78281	0.27899	4.26167e-05	3.56626e-07	0.466657	0.000501419	1.08616e-05	N	Y	Y	0	0	NA	NA	NA
chr17_46189393_46190022	4.37902	4.68246	0.303438	0.00271557	0.00140471	0.776896	0.0127127	0.00946678	0.964071	N	Y	N	0	0	NA	NA	NA
chr17_489510_505136	5.54814	6.68177	1.13363	0.00483336	0.000667489	0.477639	0.017729	0.00528248	0.748535	N	Y	N	0	0	NA	NA	NA
chr17_50351394_50357514	-5.83043	-5.11479	0	0.00425899	0.0121597	1	0.0160888	0.0412251	NA	Y	N	N	0	0	NA	NA	NA
chr17_50679133_50850712	-6.64519	-5.92955	0	0.00141757	0.00440786	1	0.00838153	0.0228557	1	Y	Y	N	0	0	NA	NA	NA
chr17_50850586_50882797	-8.23271	-7.51707	0	1.80982e-08	2.74843e-07	1	4.48215e-07	5.20511e-06	1	Y	Y	N	0	0	NA	NA	NA
chr17_54985829_54986238	3.05672	2.59704	-0.459679	0.00125325	0.00681167	0.603166	0.00767887	0.0308091	0.852082	N	N	N	0	0	NA	NA	NA
chr17_57161363_57165768	-6.73855	-6.02291	0	0.00103153	0.0033543	1	0.00665938	0.0186049	1	Y	Y	N	0	0	NA	NA	NA
chr17_57767997_57851246	-5.95968	-5.24404	0	0.00354215	0.0102848	1	0.0142558	0.0371237	NA	Y	N	N	0	0	NA	NA	NA
chr17_57808782_57816308	1.67718	0.0413698	-1.63581	5.57152e-29	0.798903	8.86717e-26	1.16068e-26	0.898338	3.28578e-23	Y	N	Y	0	0	NA	NA	NA
chr17_58700882_58711338	1.53532	1.51516	-0.0201552	0.000304229	0.00043336	0.961212	0.0025262	0.00372059	1	Y	Y	N	0	0	NA	NA	NA
chr17_58700882_58725443	3.41353	3.13502	-0.278512	6.38787e-05	0.000289959	0.709182	0.000690768	0.00262968	0.922339	Y	N	N	0	0	NA	NA	NA
chr17_59067332_59067596	-6.8091	-1.63455	5.17455	0.000231776	0.270957	0.00608407	0.00202675	0.454387	0.0369925	Y	N	N	0	0	NA	NA	NA
chr17_59853762_59857762	-1.16679	-0.856998	0.309795	2.53042e-10	6.38396e-06	0.119049	8.65845e-09	9.17193e-05	0.303656	Y	N	N	0	0	NA	NA	NA
chr17_60038228_60040332	-6.07877	0.274313	6.35308	0.0018345	0.862114	0.00116159	0.010118	0.942338	0.0107908	Y	N	N	0	0	NA	NA	NA
chr17_60111148_60112969	-0.844414	-0.885956	-0.0415426	0.0119169	0.0115562	0.908139	0.0381243	0.0396574	1	N	N	N	0	0	NA	NA	NA
chr17_62557618_62568074	3.79351	-0.376552	-4.17006	7.149e-07	0.675378	7.05416e-07	1.26275e-05	0.81508	2.01074e-05	Y	N	Y	0	0	NA	NA	NA
chr17_62587202_62602758	3.40648	-1.18563	-4.59211	4.23452e-07	0.15778	9.7896e-09	7.97689e-06	0.311384	4.1327e-07	Y	N	Y	0	0	NA	NA	NA
chr17_62817885_62818511	3.15555	2.5164	-0.639152	3.08467e-15	6.88078e-10	0.0805244	2.08083e-13	2.16607e-08	0.234132	Y	Y	N	0	0	NA	NA	NA
chr17_6493099_6503778	3.56319	3.2252	-0.337983	0.000121723	0.0005999	0.67368	0.00117302	0.00484193	0.897612	Y	N	N	0	0	NA	NA	NA
chr17_66110563_66121621	2.47345	0.0582417	-2.41521	0.00292598	0.946608	0.00435465	0.0129797	0.993592	0.0290746	Y	N	N	0	0	NA	NA	NA
chr17_70416841_70417207	6.88781	7.13705	0.24924	4.79061e-06	2.28076e-06	0.795395	6.99979e-05	3.58195e-05	0.975039	Y	Y	N	0	0	NA	NA	NA
chr17_722679_729318	2.13356	-0.885633	-3.0192	2.5505e-08	0.0424091	8.58783e-13	6.1656e-07	0.112498	8.63254e-11	Y	N	Y	0	0	NA	NA	NA
chr17_73204622_73214401	-5.9226	0.0352825	5.95788	0.0025209	0.982393	0.00249145	0.0122928	1	0.0194818	Y	N	N	0	0	NA	NA	NA
chr17_76823327_76825089	-6.12128	-0.0379654	6.08332	0.00143334	0.980412	0.0016189	0.00844622	1	0.0140417	Y	N	N	0	0	NA	NA	NA
chr17_77642782_77647218	-9.09449	-8.37885	0	3.24189e-12	1.37533e-10	1	1.52068e-10	5.03651e-09	1	Y	Y	N	0	0	NA	NA	NA
chr17_77642782_77653884	-7.37524	-6.6596	0	9.69001e-05	0.000431598	1	0.000981893	0.00370996	1	Y	Y	N	0	0	NA	NA	NA
chr17_78614243_78617610	-6.4466	-5.73095	0	0.00228057	0.00668115	1	0.0116837	0.0304975	1	Y	Y	N	0	0	NA	NA	NA
chr17_79254409_79258695	1.75422	2.6752	0.920986	0.00372604	9.23665e-06	0.109597	0.0147192	0.00012803	0.288596	Y	Y	N	0	0	NA	NA	NA
chr17_80521230_80529746	0.784964	-5.79775	-6.58271	0.606523	0.00253041	0.000588645	0.758224	0.0148985	0.00628202	N	N	N	0	0	NA	NA	NA
chr17_80828100_80858607	1.25433	2.04895	0.794623	0.000197176	1.12464e-09	0.013676	0.00177524	3.41881e-08	0.0685341	Y	Y	N	0	0	NA	NA	NA
chr17_80842021_80861354	0.0488678	-1.50318	-1.55205	0.789005	1.93467e-14	2.57471e-15	0.885521	1.21268e-12	3.57777e-13	N	Y	Y	0	0	NA	NA	NA
chr17_80842021_80869665	0.727614	0.749989	0.0223742	0.00520083	0.00474647	0.931396	0.0186898	0.0239795	1	N	N	N	0	0	NA	NA	NA
chr17_80914571_80923622	-6.95626	0.980434	7.9367	5.42056e-07	0.192101	1.03369e-08	9.86987e-06	0.359575	4.30919e-07	Y	N	Y	0	0	NA	NA	NA
chr17_80962991_81006661	-7.58721	-6.87157	0	1.06797e-05	6.67343e-05	1	0.000144338	0.000750284	1	Y	Y	N	0	0	NA	NA	NA
chr17_8354098_8363478	-8.24768	-7.53204	0	1.38589e-08	2.18698e-07	1	3.51836e-07	4.22634e-06	1	Y	Y	N	0	0	NA	NA	NA
chr17_8455364_8480656	-5.88031	-5.16466	0	0.00296717	0.0090667	1	0.0130831	0.034997	NA	Y	N	N	0	0	NA	NA	NA
chr17_8473038_8480656	-2.18516	-1.54663	0.638535	1.10735e-07	0.000189248	0.156448	2.3001e-06	0.00182126	0.369254	Y	Y	N	0	0	NA	NA	NA
chr17_9757812_9760893	-6.68485	-5.96921	0	0.00112383	0.00362814	1	0.00705956	0.0198065	1	Y	Y	N	0	0	NA	NA	NA
chr17_982570_1003975	3.14673	3.64909	0.502358	1.38002e-13	1.21597e-17	0.151038	7.57727e-12	1.07659e-15	0.361083	Y	Y	N	0	0	NA	NA	NA
chr18_11752852_11753944	-6.9961	-6.28045	0	0.000454934	0.0016476	1	0.00348356	0.0107064	1	Y	Y	N	0	0	NA	NA	NA
chr18_12999420_13019205	9.48133	10.0037	0.522341	3.86934e-15	1.13294e-16	0.0545768	2.51436e-13	9.33093e-15	0.178374	Y	Y	N	0	0	NA	NA	NA
chr18_13666478_13682104	1.29216	-0.555608	-1.84777	0.00879238	0.314248	0.000553921	0.0291283	0.502669	0.00603702	Y	N	Y	0	0	NA	NA	NA
chr18_13681604_13682104	0.978888	0.733424	-0.245464	0.000484396	0.0103056	0.381149	0.00366166	0.0371663	0.65438	N	N	N	0	0	NA	NA	NA
chr18_1626240_1649794	-6.1655	-5.44986	0	0.00291874	0.00852046	1	0.0129797	0.03429	1	Y	Y	N	0	0	NA	NA	NA
chr18_18945988_18964364	-7.02487	-6.30923	0	0.000421496	0.00154011	1	0.00327652	0.0101381	1	Y	Y	N	0	0	NA	NA	NA
chr18_18945988_18975522	-7.79644	-7.0808	0	2.16745e-06	1.69017e-05	1	3.43562e-05	0.00022047	1	Y	Y	N	0	0	NA	NA	NA
chr18_18945988_18983955	-8.19024	-7.47459	0	3.31855e-08	4.62887e-07	1	7.73246e-07	8.36385e-06	1	Y	Y	N	0	0	NA	NA	NA
chr18_18963471_18964364	-7.50188	-6.78624	0	2.295e-05	0.00012806	1	0.000284187	0.00130323	1	Y	Y	N	0	0	NA	NA	NA
chr18_18963471_18983955	-6.19693	-5.48129	0	0.00264454	0.00783459	1	0.0125899	0.033034	1	Y	Y	N	0	0	NA	NA	NA
chr18_18975346_18983955	-8.17829	-7.46264	0	6.98314e-08	8.66281e-07	1	1.50797e-06	1.48929e-05	1	Y	Y	N	0	0	NA	NA	NA
chr18_19144164_19148055	-1.27539	-1.47442	-0.199025	0.00361797	0.00141226	0.676377	0.0144454	0.0095086	0.898717	Y	N	N	0	0	NA	NA	NA
chr18_19371335_19399607	-5.90252	-5.18687	0	0.00505952	0.0137647	1	0.0183513	0.0452204	NA	Y	N	N	0	0	NA	NA	NA
chr18_19395577_19424214	-6.52971	-5.81407	0	0.001954	0.00582102	1	0.0105089	0.0277645	1	Y	Y	N	0	0	NA	NA	NA
chr18_29691717_29693823	-1.07558	-0.898479	0.177101	1.96648e-07	2.03864e-05	0.411326	3.91253e-06	0.000260644	0.685774	Y	N	N	0	0	NA	NA	NA
chr18_33775220_33783152	-7.30808	-0.61127	6.69681	3.92914e-07	0.479692	4.05217e-06	7.4412e-06	0.659483	9.35224e-05	Y	N	Y	0	0	NA	NA	NA
chr18_45391430_45396935	-1.76319	-2.53794	-0.774755	4.50854e-07	2.28427e-11	0.0473443	8.44814e-06	9.80576e-10	0.164101	Y	Y	N	0	0	NA	NA	NA
chr18_45391430_45423180	-1.61613	-1.0689	0.547221	6.41636e-05	0.00886078	0.202969	0.000691736	0.0347321	0.43671	Y	N	N	0	0	NA	NA	NA
chr18_59739906_59763183	-2.88753	-1.03282	1.85471	2.92998e-07	0.0473783	0.00155789	5.65479e-06	0.123104	0.0136725	Y	N	N	0	0	NA	NA	NA
chr18_697240_706578	-5.02508	2.10475	7.12983	0.00768254	0.156851	0.00013256	0.0259863	0.310357	0.00180813	N	N	Y	0	0	NA	NA	NA
chr18_77208782_77211816	-0.201884	-6.29883	-6.09694	0.800904	8.20794e-06	1.61563e-05	0.892371	0.00011558	0.000303556	N	Y	Y	0	0	NA	NA	NA
chr18_8076453_8088849	-9.14349	-8.42785	0	1.71744e-12	7.84953e-11	1	8.50674e-11	2.98915e-09	1	Y	Y	N	0	0	NA	NA	NA
chr18_8076453_8114825	-6.13949	-5.42385	0	0.00522677	0.013618	1	0.0187544	0.044926	NA	Y	Y	N	0	0	NA	NA	NA
chr18_9775275_9815219	-7.93617	-7.22053	0	6.25276e-07	5.79102e-06	1	1.10998e-05	8.37098e-05	1	Y	Y	N	0	0	NA	NA	NA
chr19_10246412_10246963	2.93699	2.98474	0.0477524	0.00515444	0.0048921	0.959072	0.0185607	0.0245576	1	N	N	N	0	0	NA	NA	NA
chr19_10368898_10369361	7.0153	6.04242	-0.972883	0.000125764	0.00106916	0.497076	0.00120214	0.00767257	0.764117	Y	N	N	0	0	NA	NA	NA
chr19_10602253_10602938	8.41915	7.25959	-1.15956	1.4717e-10	4.25949e-08	0.0594485	5.26466e-09	9.36956e-07	0.18882	Y	Y	N	0	0	NA	NA	NA
chr19_10694282_10694746	6.83296	0	-6.13342	0.000860299	1	0.00277676	0.00581643	1	0.0210227	Y	N	Y	0	0	NA	NA	NA
chr19_1147308_1154401	-2.15916	-2.61844	-0.459277	0.00207607	0.000363259	0.54252	0.0109167	0.00319622	0.80253	Y	Y	N	0	0	NA	NA	NA
chr19_14854232_14854596	6.45745	6.21809	-0.239359	0.00696988	0.00961735	0.909377	0.0238953	0.035966	1	N	N	N	0	0	NA	NA	NA
chr19_17212470_17213367	2.0536	2.15781	0.104215	5.82578e-08	1.5478e-08	0.774398	1.2895e-06	3.70373e-07	0.963843	Y	Y	N	0	0	NA	NA	NA
chr19_1738954_1740327	-5.58892	1.5951	7.18402	0.00106212	0.202999	2.29045e-05	0.00680811	0.373368	0.000409579	N	N	Y	0	0	NA	NA	NA
chr19_18650181_18650530	-0.841618	0.209808	1.05143	0.0128496	0.530419	0.00213792	0.0406131	0.703829	0.0172638	N	N	N	0	0	NA	NA	NA
chr19_20327949_20331226	0	8.40564	8.42174	1	2.96215e-09	2.76413e-09	1	8.35892e-08	1.2715e-07	N	Y	Y	0	0	NA	NA	NA
chr19_21302890_21303163	-5.78539	-5.06975	0	0.00291927	0.00910801	1	0.0129797	0.0350609	NA	Y	N	N	0	0	NA	NA	NA
chr19_34685383_34687668	0.183223	-3.38947	-3.57269	0.803876	0.000457944	0.000215805	0.893574	0.00387992	0.00273135	N	Y	N	0	0	NA	NA	NA
chr19_34921481_34925873	1.14057	0.99952	-0.14105	2.94086e-10	9.50485e-08	0.427153	9.9191e-09	1.9685e-06	0.700199	Y	N	N	0	0	NA	NA	NA
chr19_35749848_35750724	6.42641	6.45732	0.0309094	0.0014814	0.00145565	0.985184	0.00865027	0.00966294	1	N	Y	N	0	0	NA	NA	NA
chr19_37203288_37203769	2.01756	0.113134	-1.90443	0.000204765	0.85096	0.000791935	0.00182664	0.93507	0.00796713	Y	N	Y	0	0	NA	NA	NA
chr19_37579941_37587017	-2.91996	0.129949	3.0499	0.00631163	0.896995	0.0045233	0.022044	0.964801	0.0298127	N	N	N	0	0	NA	NA	NA
chr19_37689841_37698156	-7.75868	-7.04304	0	3.16809e-06	2.3388e-05	1	4.86759e-05	0.000294181	1	Y	Y	N	0	0	NA	NA	NA
chr19_37696857_37698156	-6.74976	-6.03412	0	0.000966355	0.00317521	1	0.00632012	0.0178209	1	Y	Y	N	0	0	NA	NA	NA
chr19_39408364_39409453	-0.169674	1.52789	1.69756	0.773112	0.00794103	0.00332928	0.877276	0.0333213	0.0241899	N	N	N	0	0	NA	NA	NA
chr19_40964062_40964452	-0.229292	-6.3443	-6.115	0.780027	8.40608e-06	1.7972e-05	0.88145	0.000117902	0.000332059	N	Y	Y	0	0	NA	NA	NA
chr19_43498902_43499513	8.24162	0	-7.54207	2.81647e-08	1	3.75118e-07	6.71685e-07	1	1.13214e-05	Y	N	Y	0	0	NA	NA	NA
chr19_44237010_44237885	1.72854	-4.86568	-6.59422	0.081917	0.00150694	1.34474e-05	0.187667	0.00994945	0.000262264	N	N	Y	0	0	NA	NA	NA
chr19_45528587_45528995	2.5679	-0.471862	-3.03976	0.000105812	0.530549	2.28545e-05	0.00105262	0.703855	0.000409579	Y	N	Y	0	0	NA	NA	NA
chr19_45783632_45783992	3.40748	-0.72683	-4.13431	0.0107786	0.63031	0.00440334	0.0349725	0.780699	0.0292533	Y	N	Y	0	0	NA	NA	NA
chr19_47919909_47920607	1.32781	-5.96517	-7.29298	0.260917	0.000336414	1.07479e-05	0.449216	0.00299071	0.000218562	N	N	Y	0	0	NA	NA	NA
chr19_48229069_48229481	-6.70798	-5.99234	0	0.00103932	0.00339213	1	0.00669834	0.0187706	1	Y	Y	N	0	0	NA	NA	NA
chr19_48922491_48923071	-6.15832	-5.44268	0	0.00260834	0.0077992	1	0.0125084	0.0329408	1	Y	Y	N	0	0	NA	NA	NA
chr19_49348627_49355583	6.07764	6.22464	0.147004	0.0112461	0.00958941	0.944397	0.0362897	0.035966	1	N	Y	N	0	0	NA	NA	NA
chr19_49407604_49409142	-6.04774	-5.33209	0	0.00337209	0.0097462	1	0.0138281	0.0361345	NA	Y	N	N	0	0	NA	NA	NA
chr19_5039847_5047680	-0.686457	-1.09692	-0.410467	0.0097111	0.000101978	0.153227	0.0319182	0.00108072	0.36476	N	Y	N	0	0	NA	NA	NA
chr19_5077378_5082515	-5.78591	-5.07027	0	0.00362428	0.0107935	1	0.0144624	0.0380848	NA	Y	N	N	0	0	NA	NA	NA
chr19_50902108_50902741	1.28519	1.44069	0.155499	4.56258e-07	2.92279e-08	0.524071	8.52686e-06	6.6781e-07	0.786354	Y	Y	N	0	0	NA	NA	NA
chr19_54025110_54025938	-6.01803	-5.30238	0	0.00387406	0.0109347	1	0.0150274	0.0383418	NA	Y	N	N	0	0	NA	NA	NA
chr19_56657616_56658577	0	6.93639	6.95249	1	0.00150522	0.00146754	1	0.00994945	0.0131037	N	N	Y	0	0	NA	NA	NA
chr19_6702138_6702590	-0.919402	-6.86239	-5.94299	0.203436	5.31483e-07	1.54153e-05	0.376814	9.48235e-06	0.000292935	N	Y	Y	0	0	NA	NA	NA
chr19_9643521_9645955	-0.260022	-6.05393	-5.79391	0.869612	0.00204736	0.00319482	0.935776	0.01261	0.0234064	N	Y	N	0	0	NA	NA	NA
chr2_101521195_101554304	-6.7298	0.564177	7.29398	1.74789e-06	0.478476	2.25806e-07	2.85261e-05	0.658366	7.24098e-06	N	N	N	0	0	NA	NA	NA
chr2_106774514_106782539	1.43263	1.38941	-0.0432134	9.49277e-05	0.000198896	0.903702	0.000967443	0.00188844	1	Y	Y	N	0	0	NA	NA	NA
chr2_10784446_10808849	0.966711	-0.563854	-1.53056	0.0143777	0.193136	0.000302726	0.0447637	0.360945	0.00361898	N	N	Y	0	0	NA	NA	NA
chr2_109964130_109988137	-6.54493	-5.82929	0	0.00213761	0.00624396	1	0.0111411	0.029096	1	Y	Y	N	0	0	NA	NA	NA
chr2_11426665_11428575	-0.0968207	-8.04512	-7.9483	0.792182	6.1562e-11	1.0465e-10	0.887399	2.40908e-09	6.12294e-09	N	Y	Y	0	0	NA	NA	NA
chr2_122260743_122287901	0.756875	0.066094	-0.690781	0.00153665	0.792128	0.00494446	0.00889668	0.894257	0.0319767	N	N	N	0	0	NA	NA	NA
chr2_135007621_135012215	2.71364	2.97486	0.261225	0.00248432	0.000973312	0.750773	0.0122147	0.00715027	0.949496	Y	N	N	0	0	NA	NA	NA
chr2_135007621_135028121	7.94888	7.10291	-0.845963	7.26284e-09	2.90886e-07	0.251914	1.9939e-07	5.46511e-06	0.501273	Y	Y	N	0	0	NA	NA	NA
chr2_135010666_135012215	3.9165	3.7317	-0.184796	3.97205e-53	4.48739e-47	0.328035	2.16416e-50	2.2703e-44	0.593435	Y	Y	N	0	0	NA	NA	NA
chr2_135010666_135076310	6.95059	6.76834	-0.182249	0.000267503	0.000405141	0.904453	0.00227731	0.00350809	1	Y	Y	N	0	0	NA	NA	NA
chr2_135011833_135012215	5.96052	6.51359	0.55307	0.00313712	0.00125846	0.738794	0.0134587	0.00870479	0.94207	N	Y	N	0	0	NA	NA	NA
chr2_135099161_135119979	6.68572	0	-5.98619	0.00127113	1	0.00391119	0.00774155	1	0.0272883	Y	N	Y	0	0	NA	NA	NA
chr2_136360070_136362586	1.42286	1.44871	0.0258494	0.0028229	0.00279418	0.955327	0.0128554	0.0161429	1	Y	N	N	0	0	NA	NA	NA
chr2_136620177_136622733	1.21302	0.316786	-0.896232	2.26719e-09	0.147541	1.72701e-05	6.83341e-08	0.296211	0.000320867	Y	N	N	0	0	NA	NA	NA
chr2_143642918_143685310	-9.60855	-8.8929	0	1.88984e-14	1.36508e-12	1	1.15394e-12	6.76143e-11	1	Y	Y	N	0	0	NA	NA	NA
chr2_143642918_143718339	-6.94108	-6.22543	0	0.000495653	0.00178423	1	0.00372291	0.0114162	1	Y	Y	N	0	0	NA	NA	NA
chr2_143712379_143718339	-6.20069	-5.48505	0	0.00247709	0.00743133	1	0.0122147	0.0320952	1	Y	Y	N	0	0	NA	NA	NA
chr2_148653870_148657467	-0.183634	-1.37892	-1.19528	0.583144	0.000140827	0.00100173	0.742572	0.00141687	0.0096974	N	Y	Y	0	0	NA	NA	NA
chr2_15629018_15651474	0.933756	-3.03891	-3.97267	0.177258	0.000362048	2.70312e-06	0.341916	0.00319351	6.55005e-05	N	N	N	0	0	NA	NA	NA
chr2_156666440_156669306	6.03278	5.57499	-0.457793	0.00212514	0.00490661	0.776356	0.0111315	0.0246001	0.963985	Y	N	N	0	0	NA	NA	NA
chr2_168920010_168931741	0.940604	-0.563409	-1.50401	0.00971897	0.157218	0.000113807	0.0319293	0.310793	0.00162546	N	N	Y	0	0	NA	NA	NA
chr2_169018297_169023917	-1.17791	-1.31356	-0.135654	0.0109747	0.00628214	0.782964	0.0355095	0.0292266	0.96774	Y	N	N	0	0	NA	NA	NA
chr2_169547544_169574488	0.991857	1.22626	0.234403	0.00147245	0.000114361	0.438225	0.00862641	0.00118901	0.710492	N	N	N	0	0	NA	NA	NA
chr2_170728746_170735084	0.197354	-1.9052	-2.10255	0.604939	1.6186e-05	1.80223e-06	0.757564	0.000212307	4.55337e-05	N	Y	Y	0	0	NA	NA	NA
chr2_172305191_172333460	-5.82881	0.703735	6.53254	0.000240341	0.520361	3.8572e-05	0.00209132	0.695025	0.000635248	Y	N	Y	0	0	NA	NA	NA
chr2_172782047_172809519	-2.25992	-2.11471	0.145211	1.37191e-11	2.52297e-09	0.70674	5.8187e-10	7.20571e-08	0.921013	Y	Y	N	0	0	NA	NA	NA
chr2_174223440_174224219	0.0355228	1.10854	1.07302	0.923041	0.00227817	0.00308289	0.966859	0.0136864	0.0228476	N	N	N	0	0	NA	NA	NA
chr2_175976296_175986268	1.60191	-4.91554	-6.51745	0.104413	0.00129815	1.61273e-05	0.227784	0.00890968	0.000303556	N	N	Y	0	0	NA	NA	NA
chr2_176835492_176860374	-2.46192	-3.6005	-1.13857	2.80329e-06	6.14617e-10	0.0571451	4.36389e-05	1.96096e-08	0.183691	Y	Y	N	0	0	NA	NA	NA
chr2_176844538_176859008	-6.30477	-0.55235	5.75242	0.00198337	0.744959	0.00511989	0.0106265	0.862885	0.0326415	Y	N	N	0	0	NA	NA	NA
chr2_188348851_188368497	-7.21241	-6.49677	0	0.000142987	0.000613442	1	0.00134499	0.00493191	1	Y	Y	N	0	0	NA	NA	NA
chr2_197777606_197786910	2.14019	2.12625	-0.0139383	0.00336207	0.00390389	0.984096	0.0138211	0.0209162	1	Y	N	N	0	0	NA	NA	NA
chr2_19844520_19874103	-5.96653	-5.25089	0	0.00315233	0.00936728	1	0.0134896	0.0355947	NA	Y	N	N	0	0	NA	NA	NA
chr2_201881714_201887655	-5.81947	0.533667	6.35313	0.00323825	0.740439	0.00132379	0.0136041	0.859477	0.0120624	Y	N	N	0	0	NA	NA	NA
chr2_206036935_206058044	1.77656	-4.6829	-6.45946	0.217396	0.0115242	0.000434998	0.394926	0.0396056	0.00493442	N	N	Y	0	0	NA	NA	NA
chr2_207144264_207162097	0.17202	-2.06867	-2.24069	0.214799	9.88423e-32	3.27717e-37	0.39091	2.50036e-29	3.12267e-34	N	Y	Y	0	0	NA	NA	NA
chr2_207988498_207989128	-6.21684	-5.50119	0	0.00616757	0.015373	1	0.0216048	0.0493818	1	Y	Y	N	0	0	NA	NA	NA
chr2_209150450_209153542	-1.04215	-1.50107	-0.458923	0.00248276	4.9358e-05	0.226765	0.0122147	0.000570314	0.47086	Y	Y	N	0	0	NA	NA	NA
chr2_212483902_212495319	-5.9275	-5.21186	0	0.0031777	0.00949102	1	0.0135221	0.0358401	NA	Y	N	N	0	0	NA	NA	NA
chr2_214174783_214182080	-6.52041	-5.80476	0	0.00157989	0.004911	1	0.00906838	0.0246001	1	Y	Y	N	0	0	NA	NA	NA
chr2_215632206_215646233	-0.14655	-2.06705	-1.9205	0.818844	0.00220931	0.00449588	0.902844	0.0133977	0.02972	N	Y	N	0	0	NA	NA	NA
chr2_220657099_220658892	7.47681	0	-6.77727	0.000197249	1	0.000740266	0.00177524	1	0.00760797	Y	N	Y	0	0	NA	NA	NA
chr2_227574201_227600966	-6.04503	-5.32938	0	0.00278121	0.00836786	1	0.0128418	0.0341957	NA	Y	N	N	0	0	NA	NA	NA
chr2_228352333_228356356	-6.24111	-5.52546	0	0.00302237	0.00865429	1	0.01319	0.034477	1	Y	Y	N	0	0	NA	NA	NA
chr2_230633332_230636348	-0.437492	2.03261	2.47011	0.585431	0.00928812	0.00174218	0.744244	0.0354078	0.0148598	N	Y	N	0	0	NA	NA	NA
chr2_236626201_236659132	0.845881	-5.02894	-5.87482	0.615785	0.0140126	0.00396172	0.765194	0.0458215	0.0274685	N	N	N	0	0	NA	NA	NA
chr2_236706403_236715975	1.74934	-0.761705	-2.51105	0.00774307	0.2708	0.000230972	0.0261786	0.454306	0.00289037	Y	N	N	0	0	NA	NA	NA
chr2_239090706_239093928	0.216147	1.0816	0.865455	0.494921	0.000610041	0.00580039	0.67583	0.00491014	0.0359225	N	N	N	0	0	NA	NA	NA
chr2_240929491_240946787	-1.16034	-0.171425	0.988915	4.82724e-18	0.19486	7.20655e-13	4.68375e-16	0.362923	7.39502e-11	Y	N	N	0	0	NA	NA	NA
chr2_240929491_240951113	-6.20781	-0.267717	5.94009	0.00244974	0.875342	0.00395214	0.0121595	0.949762	0.0274305	Y	N	Y	0	0	NA	NA	NA
chr2_241492331_241494472	6.57118	6.7128	0.141619	3.42757e-05	2.483e-05	0.896557	0.000404624	0.000309632	1	Y	Y	N	0	0	NA	NA	NA
chr2_24181171_24199945	1.84091	1.0633	-0.777605	4.41426e-06	0.0112193	0.0476086	6.55476e-05	0.0388777	0.164321	Y	N	N	0	0	NA	NA	NA
chr2_24205766_24207701	1.28165	1.57048	0.288828	0.00487341	0.000619182	0.514903	0.0178482	0.00497241	0.778949	Y	N	N	0	0	NA	NA	NA
chr2_242514536_242523001	0	6.80414	6.82024	1	0.0008365	0.000813047	1	0.0063086	0.00809012	N	Y	Y	0	0	NA	NA	NA
chr2_242593961_242594758	0	6.86151	6.87762	1	0.00118039	0.0011493	1	0.00831707	0.0107065	N	Y	Y	0	0	NA	NA	NA
chr2_24516557_24518673	2.47731	-0.358568	-2.83588	0.00563793	0.714183	0.00265394	0.0199468	0.841971	0.0204173	Y	N	Y	0	0	NA	NA	NA
chr2_24787164_24807429	1.4839	1.26348	-0.220425	9.51459e-05	0.0012351	0.550275	0.000968274	0.00859354	0.8088	Y	N	N	0	0	NA	NA	NA
chr2_29124853_29137074	6.20993	5.71261	-0.497325	0.00135453	0.00347929	0.752416	0.00813063	0.0191781	0.95021	Y	N	N	0	0	NA	NA	NA
chr2_32142995_32168452	-0.945844	-1.5369	-0.591061	0.00890497	7.65954e-05	0.136499	0.0294325	0.000845055	0.335958	N	Y	N	0	0	NA	NA	NA
chr2_32142995_32181667	-6.34194	-5.6263	0	0.00230588	0.00685511	1	0.0117187	0.0308848	1	Y	Y	N	0	0	NA	NA	NA
chr2_32602656_32620661	8.01028	6.09768	-1.9126	4.59047e-07	0.000155026	0.0840081	8.55639e-06	0.00153145	0.241211	Y	Y	N	0	0	NA	NA	NA
chr2_36596251_36623930	-1.91322	-7.3849	-5.47168	0.10691	8.26537e-06	0.00103595	0.232425	0.000116158	0.00988528	N	Y	N	0	0	NA	NA	NA
chr2_37543380_37544322	2.86602	0.418002	-2.44802	5.38724e-07	0.493354	2.41185e-05	9.85872e-06	0.672652	0.000426712	Y	N	Y	0	0	NA	NA	NA
chr2_38349127_38358756	-6.01193	-5.29629	0	0.00302952	0.00900632	1	0.0132131	0.0349007	NA	Y	Y	N	0	0	NA	NA	NA
chr2_43655239_43657441	2.4605	2.44671	-0.01379	0.000123016	0.000163167	0.981334	0.00118387	0.0015998	1	Y	Y	N	0	0	NA	NA	NA
chr2_43725972_43755127	2.53299	1.71404	-0.818948	3.65265e-10	3.97572e-05	0.032434	1.22615e-08	0.000471692	0.127406	Y	Y	N	0	0	NA	NA	NA
chr2_43732761_43755127	6.55826	6.69248	0.134223	0.000562189	0.000447541	0.929275	0.00410937	0.00380544	1	N	Y	N	0	0	NA	NA	NA
chr2_43805652_43818093	4.64674	5.00705	0.360317	0.000229661	7.49434e-05	0.707651	0.00201074	0.000828119	0.921677	Y	Y	N	0	0	NA	NA	NA
chr2_44190727_44202356	2.67983	3.46507	0.785238	0.00108249	2.3338e-05	0.27163	0.00690122	0.000294133	0.525143	Y	Y	N	0	0	NA	NA	NA
chr2_45925080_45928630	6.2577	0	-5.55816	0.00269709	1	0.00770131	0.0126502	1	0.0442444	N	N	N	0	0	NA	NA	NA
chr2_47600602_47601187	7.18053	7.21931	0.0387832	1.96331e-07	1.8891e-07	0.958605	3.91253e-06	3.69628e-06	1	Y	Y	N	0	0	NA	NA	NA
chr2_47604153_47607108	7.50796	7.83802	0.330055	4.50332e-08	1.19171e-08	0.648187	1.0126e-06	2.92071e-07	0.881249	Y	Y	N	0	0	NA	NA	NA
chr2_48555700_48573890	2.37858	3.37648	0.997904	7.65507e-05	1.70611e-08	0.0601516	0.000810279	4.04161e-07	0.190599	Y	Y	N	0	0	NA	NA	NA
chr2_53628798_53642744	-9.52063	-8.80498	0	4.57861e-14	3.02875e-12	1	2.68019e-12	1.43018e-10	1	Y	Y	N	0	0	NA	NA	NA
chr2_55209651_55214834	-0.529688	-0.931689	-0.402002	0.00480688	1.17995e-06	0.0370021	0.0176633	1.96649e-05	0.140279	N	N	N	0	0	NA	NA	NA
chr2_55812187_55816092	-5.96888	-5.25324	0	0.00299156	0.00898352	1	0.0131122	0.0349007	NA	N	N	N	0	0	NA	NA	NA
chr2_61552510_61561106	-0.0507218	-5.11968	-5.06896	0.965024	0.00168451	0.00187898	0.993065	0.0109062	0.015725	N	N	N	0	0	NA	NA	NA
chr2_61709515_61717911	0.927025	0.948151	0.0211263	0.0158162	0.0150287	0.955813	0.0487284	0.0484737	1	N	N	N	0	0	NA	NA	NA
chr2_61712903_61717911	1.1879	0.978731	-0.209167	3.9053e-08	1.23271e-05	0.325193	8.98093e-07	0.00016631	0.589859	Y	N	N	0	0	NA	NA	NA
chr2_61749746_61761038	-0.710955	-0.59254	0.118415	0.00114157	0.00704083	0.591863	0.00711145	0.0311954	0.842811	N	N	N	0	0	NA	NA	NA
chr2_65228582_65237897	0.35413	-5.61942	-5.97355	0.718447	0.000221856	8.33763e-05	0.837793	0.00207583	0.00125252	N	Y	Y	0	0	NA	NA	NA
chr2_68717322_68740812	7.68133	6.59701	-1.08432	5.13185e-07	1.94119e-05	0.282004	9.49057e-06	0.000250903	0.538959	Y	Y	N	0	0	NA	NA	NA
chr2_68717322_68742868	7.78772	6.35712	-1.43059	3.11315e-08	8.44335e-06	0.0797943	7.32573e-07	0.00011819	0.232821	Y	Y	N	0	0	NA	NA	NA
chr2_69297779_69304620	-6.27048	-5.55484	0	0.00230155	0.00692595	1	0.0117187	0.0310297	1	Y	Y	N	0	0	NA	NA	NA
chr2_69585461_69597240	-5.82054	-5.1049	0	0.00309544	0.00947572	1	0.0133852	0.0358187	NA	Y	N	N	0	0	NA	NA	NA
chr2_72692289_72707879	-1.27575	-1.96998	-0.694234	0.00511621	6.5669e-05	0.170252	0.01847	0.00074184	0.390138	Y	Y	N	0	0	NA	NA	NA
chr2_72922129_72958374	-5.78705	-5.07141	0	0.00301716	0.00934408	1	0.0131754	0.0355256	NA	Y	N	N	0	0	NA	NA	NA
chr2_72945232_72945436	-5.79747	-5.08183	0	0.00542042	0.0147832	1	0.019322	0.0478344	NA	N	N	N	0	0	NA	NA	NA
chr2_72945232_72958374	-2.96639	-2.86918	0.0972111	0.000195479	0.000450721	0.909118	0.00176604	0.00382788	1	N	Y	N	0	0	NA	NA	NA
chr2_72945232_72968598	0.858998	-5.24639	-6.10539	0.405562	0.000746343	7.92171e-05	0.598208	0.00580279	0.00119543	N	N	Y	0	0	NA	NA	NA
chr2_85097349_85097909	-7.02823	-6.31258	0	0.000488576	0.00173686	1	0.0036854	0.0111635	1	Y	Y	N	0	0	NA	NA	NA
chr2_86479080_86491164	-6.12483	-5.40919	0	0.00387689	0.0107548	1	0.0150301	0.0379932	NA	Y	Y	N	0	0	NA	NA	NA
chr2_9377962_9437574	3.92836	-0.106184	-4.03454	0.00241696	0.942547	0.00339286	0.0120729	0.991446	0.0243862	Y	N	Y	0	0	NA	NA	NA
chr2_9490937_9508648	1.37794	-0.07518	-1.45312	0.000491275	0.858433	0.000387702	0.00369787	0.93991	0.00449734	Y	N	Y	0	0	NA	NA	NA
chr2_98430434_98435184	-0.41298	-6.53023	-6.11725	0.574136	2.09084e-06	9.20621e-06	0.734309	3.33545e-05	0.0001907	N	Y	N	0	0	NA	NA	NA
chr2_99811214_99832577	-5.93245	-0.66384	5.26861	0.00269224	0.685182	0.00848403	0.0126502	0.821037	0.0477137	Y	N	N	0	0	NA	NA	NA
chr20_13550154_13568017	5.44331	7.01427	1.57096	0.0032819	0.000138977	0.27693	0.0136834	0.00140025	0.532926	N	Y	N	0	0	NA	NA	NA
chr20_16506737_16509085	0.0337979	2.31695	2.28315	0.913715	4.94239e-15	1.02319e-14	0.959502	3.21165e-13	1.36494e-12	N	Y	Y	0	0	NA	NA	NA
chr20_20634174_20661445	-6.46096	-5.74532	0	0.00194117	0.00585452	1	0.0104478	0.0278492	1	Y	Y	N	0	0	NA	NA	NA
chr20_30954187_30978970	0.0247336	-1.13941	-1.16415	0.929963	0.000259159	0.000187068	0.970774	0.00238084	0.0024181	N	N	Y	0	0	NA	NA	NA
chr20_32677322_32678408	7.18451	5.16411	-2.0204	4.08582e-05	0.00395844	0.13744	0.000469042	0.0211133	0.33728	Y	N	N	0	0	NA	NA	NA
chr20_33632308_33645374	2.06653	1.38795	-0.678579	7.45669e-06	0.00386799	0.124257	0.000104793	0.0208326	0.312616	Y	N	N	0	0	NA	NA	NA
chr20_33954360_33971936	1.01168	1.58332	0.571636	1.4216e-05	1.31325e-11	0.0110229	0.000186812	5.77747e-10	0.0581668	N	Y	N	0	0	NA	NA	NA
chr20_33969721_33971936	-5.62151	0.877074	6.49859	0.00110585	0.494814	0.00015887	0.00700256	0.673864	0.00209007	N	N	Y	0	0	NA	NA	NA
chr20_34284299_34286512	-5.76907	-5.05343	0	0.00404369	0.011798	1	0.0154568	0.0403503	NA	N	N	N	0	0	NA	NA	NA
chr20_34430495_34446303	-1.14202	-6.90367	-5.76165	0.376268	6.93542e-05	0.000940542	0.572157	0.000777272	0.0091736	N	Y	N	0	0	NA	NA	NA
chr20_34487292_34487570	-7.76808	-1.47524	6.29284	1.68539e-06	0.199771	0.000126037	2.75696e-05	0.36906	0.00174412	Y	N	N	0	0	NA	NA	NA
chr20_35236118_35238133	-2.69712	-2.10455	0.592575	7.75367e-12	1.34187e-07	0.181607	3.39008e-10	2.71556e-06	0.406482	Y	Y	N	0	0	NA	NA	NA
chr20_36685934_36694658	1.36024	0.886659	-0.473577	1.55739e-06	0.00222291	0.0924791	2.57733e-05	0.0134686	0.257551	Y	N	N	0	0	NA	NA	NA
chr20_37630373_37634999	0	6.45064	6.46675	1	0.0025688	0.0025059	1	0.0150619	0.0195261	N	Y	N	0	0	NA	NA	NA
chr20_43248940_43251571	0	7.31437	7.33047	1	9.86984e-05	9.52738e-05	1	0.00105125	0.00140904	N	Y	Y	0	0	NA	NA	NA
chr20_47682729_47683047	3.56957	3.62954	0.0599724	6.07424e-08	4.59147e-08	0.914891	1.33201e-06	9.97588e-07	1	Y	Y	N	0	0	NA	NA	NA
chr20_50290692_50307358	1.5567	-2.39023	-3.94693	0.0625583	0.0139456	4.06862e-05	0.149747	0.0456455	0.00066514	N	N	N	0	0	NA	NA	NA
chr20_52773708_52788209	10.4465	0	-9.74692	4.90087e-18	1	6.6921e-16	4.69093e-16	1	1.01446e-13	Y	N	Y	0	0	NA	NA	NA
chr20_56846419_56847931	0.218512	-1.46651	-1.68502	0.52587	0.00013218	1.03656e-05	0.700402	0.00134323	0.000212081	N	N	Y	0	0	NA	NA	NA
chr20_56991842_56993419	-7.19029	-2.14324	5.04705	4.36848e-05	0.119477	0.00515985	0.000499064	0.252689	0.0327773	Y	N	N	0	0	NA	NA	NA
chr20_58755108_58755971	6.90855	0	-6.20902	0.000823064	1	0.00264528	0.00560259	1	0.0203741	Y	N	Y	0	0	NA	NA	NA
chr20_5939174_5948671	5.04836	4.75462	-0.293737	1.91707e-05	6.4435e-05	0.734151	0.000242475	0.000729063	0.938304	Y	Y	N	0	0	NA	NA	NA
chr20_60888144_60888516	0.60991	-5.23926	-5.84917	0.546767	0.000669387	0.000136062	0.715586	0.00528569	0.00184525	N	N	N	0	0	NA	NA	NA
chr20_61291764_61292527	9.62036	6.66494	-2.95543	1.38343e-07	0.000295517	0.0370362	2.83203e-06	0.00266879	0.140279	Y	N	N	0	0	NA	NA	NA
chr20_62895782_62899363	0	7.04388	7.05998	1	0.000460532	0.00044691	1	0.00389719	0.00504381	N	Y	Y	0	0	NA	NA	NA
chr21_16386665_16415891	-6.70742	-5.99177	0	0.00103233	0.00337395	1	0.00665938	0.0186846	1	Y	Y	N	0	0	NA	NA	NA
chr21_26793020_26796961	0	6.83548	6.85158	1	0.000837227	0.000813864	1	0.0063086	0.00809012	N	Y	Y	0	0	NA	NA	NA
chr21_26825503_26838789	0	7.64721	7.66331	1	6.60679e-06	6.31836e-06	1	9.47286e-05	0.000139548	N	Y	Y	0	0	NA	NA	NA
chr21_32537279_32567621	2.06787	-1.08507	-3.15295	0.000265557	0.0804739	2.19243e-07	0.00226493	0.186823	7.0645e-06	Y	N	N	0	0	NA	NA	NA
chr21_32537279_32575328	1.8222	-1.13298	-2.95518	0.00382401	0.108539	1.84727e-05	0.0149313	0.235102	0.000339429	Y	N	Y	0	0	NA	NA	NA
chr21_32554738_32567621	1.97208	-1.14235	-3.11444	0.000169274	0.0504453	4.95288e-08	0.00155106	0.129929	1.87703e-06	Y	N	N	0	0	NA	NA	NA
chr21_36206707_36231875	1.5001	1.93164	0.431543	0.00051309	9.02276e-06	0.287779	0.00384573	0.00012531	0.545308	Y	Y	N	0	0	NA	NA	NA
chr21_37619815_37620866	2.30939	0.659662	-1.64973	9.09161e-11	0.088478	3.9148e-06	3.5189e-09	0.201573	9.06657e-05	Y	N	Y	0	0	NA	NA	NA
chr21_37775056_37783902	2.74008	2.58938	-0.1507	1.78626e-12	5.78463e-11	0.662745	8.72557e-11	2.28897e-09	0.891075	Y	Y	N	0	0	NA	NA	NA
chr21_38792601_38794954	-5.92114	-5.2055	0	0.00351446	0.0102886	1	0.0142245	0.0371237	NA	Y	N	N	0	0	NA	NA	NA
chr21_38792601_38802702	-0.349435	-1.34103	-0.991594	0.0390502	8.96878e-13	1.61391e-07	0.100106	4.53756e-11	5.4361e-06	N	Y	Y	0	0	NA	NA	NA
chr21_42609440_42622828	8.04469	5.04706	-2.99764	1.01267e-05	0.00691712	0.0394563	0.000137672	0.0310285	0.146696	Y	N	N	0	0	NA	NA	NA
chr21_42860321_42861520	0	7.2876	7.30371	1	0.000107286	0.000103586	1	0.00112246	0.00150527	N	Y	Y	0	0	NA	NA	NA
chr21_45012106_45033828	-6.64115	-5.92551	0	0.00157051	0.00479237	1	0.00903648	0.0241597	1	Y	Y	N	0	0	NA	NA	NA
chr21_45497574_45500008	1.85478	2.43006	0.575279	0.000366643	3.20946e-06	0.238229	0.00293439	4.93116e-05	0.483811	Y	Y	N	0	0	NA	NA	NA
chr21_46536848_46548488	-6.55779	-5.84215	0	0.00192525	0.00572618	1	0.0104016	0.0273972	1	Y	Y	N	0	0	NA	NA	NA
chr21_46540709_46554747	-6.68068	-5.96503	0	0.00110692	0.00358633	1	0.00700256	0.0196458	1	Y	Y	N	0	0	NA	NA	NA
chr21_46548317_46554747	-1.21263	-6.96291	-5.75028	0.0917422	3.34728e-07	2.82601e-05	0.205441	6.22278e-06	0.000487645	N	Y	N	0	0	NA	NA	NA
chr22_18975270_18975708	-2.29505	0.898649	3.1937	0.000652801	0.137616	1.95358e-06	0.00466578	0.281146	4.89864e-05	Y	N	Y	0	0	NA	NA	NA
chr22_19808121_19808898	6.06876	6.61231	0.543543	0.012379	0.00645814	0.799134	0.0393361	0.0297419	0.976589	N	N	N	0	0	NA	NA	NA
chr22_24002052_24026054	-6.26811	-5.55247	0	0.00225631	0.00681951	1	0.0116202	0.0308249	1	Y	Y	N	0	0	NA	NA	NA
chr22_28692186_28693840	-11.1344	-10.4187	0	1.32953e-20	3.10073e-18	1	1.59611e-18	2.8898e-16	1	Y	Y	N	0	0	NA	NA	NA
chr22_28692186_28702631	-9.00341	-8.28777	0	1.12241e-11	4.10022e-10	1	4.84758e-10	1.36347e-08	1	Y	Y	N	0	0	NA	NA	NA
chr22_28910745_28913267	-7.27849	-6.56285	0	9.88703e-05	0.000447194	1	0.000996124	0.00380544	1	Y	Y	N	0	0	NA	NA	NA
chr22_28910745_28915308	-8.80765	-8.09201	0	3.69052e-11	1.21363e-09	1	1.46854e-09	3.67358e-08	1	Y	Y	N	0	0	NA	NA	NA
chr22_28911615_28915308	-5.84847	-5.13282	0	0.00569682	0.015248	1	0.0201175	0.0490693	NA	Y	N	N	0	0	NA	NA	NA
chr22_28943662_28946139	-6.21839	-5.50274	0	0.00279085	0.00814999	1	0.0128554	0.0336597	1	Y	Y	N	0	0	NA	NA	NA
chr22_29025540_29025818	-6.08102	-5.36537	0	0.00266267	0.00803334	1	0.0125899	0.033574	NA	Y	Y	N	0	0	NA	NA	NA
chr22_29025540_29029962	-6.61606	-5.90041	0	0.00153075	0.00471289	1	0.00887984	0.0238779	1	Y	Y	N	0	0	NA	NA	NA
chr22_30366965_30375041	-4.58538	-3.68998	0.8954	0.00233544	0.0135807	0.572127	0.011782	0.0448939	0.826795	Y	Y	N	0	0	NA	NA	NA
chr22_34157358_34161940	6.53784	5.88541	-0.652433	0.00507038	0.0121319	0.749008	0.0183513	0.0411739	0.948525	Y	N	N	0	0	NA	NA	NA
chr22_40915468_40948371	-5.02741	-6.19762	-1.17021	0.00590776	0.00127695	0.588998	0.0208182	0.00881546	0.840443	Y	Y	N	0	0	NA	NA	NA
chr22_43286953_43287188	-0.106015	-1.06233	-0.956311	0.639037	1.84106e-05	0.000119731	0.783774	0.000238832	0.00168482	N	Y	Y	0	0	NA	NA	NA
chr22_44229520_44237812	-7.24769	-6.53205	0	0.000134704	0.000580141	1	0.00128068	0.00471428	1	Y	Y	N	0	0	NA	NA	NA
chr22_45970391_45972988	-7.35019	-6.63455	0	7.06849e-05	0.000334444	1	0.000758578	0.0029797	1	Y	Y	N	0	0	NA	NA	NA
chr22_46085592_46098727	-2.38924	-1.8287	0.560541	6.91743e-26	1.35146e-15	0.0201936	1.19503e-23	9.29359e-14	0.0907012	Y	Y	N	0	0	NA	NA	NA
chr22_46085592_46125470	-0.932253	-2.7887	-1.85644	0.110668	1.11696e-05	0.00368993	0.238909	0.00015273	0.0259892	N	Y	N	0	0	NA	NA	NA
chr22_46085592_46136418	-0.881156	-1.27631	-0.395153	0.00877698	0.000287498	0.269571	0.0290909	0.00261406	0.522839	N	Y	N	0	0	NA	NA	NA
chr22_46096162_46136418	-1.79501	-2.04173	-0.246722	3.62877e-11	1.043e-12	0.407023	1.46033e-09	5.23943e-11	0.681895	Y	Y	N	0	0	NA	NA	NA
chr22_46493806_46494438	-6.01372	0.101438	6.11515	0.00238689	0.950049	0.00209326	0.0119648	0.995195	0.0169855	N	N	N	0	0	NA	NA	NA
chr22_46493806_46505788	-6.59554	-5.8799	0	0.00148792	0.00462132	1	0.00866845	0.0235827	1	Y	Y	N	0	0	NA	NA	NA
chr22_46572650_46594488	-7.13864	-6.423	0	0.000218674	0.000881514	1	0.00193126	0.00657238	1	Y	Y	N	0	0	NA	NA	NA
chr22_47287162_47325531	-6.3416	-0.351445	5.99015	0.00128822	0.827201	0.00252226	0.00782026	0.919316	0.0196078	Y	N	N	0	0	NA	NA	NA
chr22_48081949_48082955	-8.40128	-7.68564	0	4.32485e-09	7.82431e-08	1	1.25032e-07	1.63963e-06	1	Y	Y	N	0	0	NA	NA	NA
chr22_50563821_50566936	-6.3712	-5.65556	0	0.00226416	0.00672328	1	0.0116387	0.0305275	1	Y	Y	N	0	0	NA	NA	NA
chr22_50810449_50827540	-6.28887	-5.57323	0	0.00249035	0.00735482	1	0.0122147	0.0319379	1	Y	N	N	0	0	NA	NA	NA
chr22_50810449_50832564	-0.772093	-2.78737	-2.01528	0.0534521	6.04316e-10	8.96208e-06	0.130959	1.93736e-08	0.000186221	N	Y	Y	0	0	NA	NA	NA
chr3_100002451_100009545	-5.87517	-5.15952	0	0.00369857	0.0107969	1	0.014651	0.0380848	NA	Y	N	N	0	0	NA	NA	NA
chr3_111828390_111831992	1.66514	-4.6863	-6.35144	0.0857574	0.00199466	2.1662e-05	0.194979	0.0123714	0.000392624	N	N	Y	0	0	NA	NA	NA
chr3_112968569_112969680	6.81219	0	-6.11266	0.00091188	1	0.00292207	0.00604195	1	0.0218256	Y	N	Y	0	0	NA	NA	NA
chr3_11399892_11421526	-0.487645	-1.68995	-1.2023	0.102469	2.41384e-07	0.000269015	0.224425	4.60842e-06	0.00328031	N	Y	Y	0	0	NA	NA	NA
chr3_11641366_11643496	-2.88248	5.32178	8.20426	0.093401	2.37119e-05	1.64547e-07	0.208169	0.000296211	5.46033e-06	N	Y	Y	0	0	NA	NA	NA
chr3_11643307_11744521	-5.89002	-5.17437	0	0.00540712	0.0145359	1	0.019294	0.0472066	NA	Y	N	N	0	0	NA	NA	NA
chr3_119624602_119666198	-7.10909	-6.39345	0	0.000269049	0.00105049	1	0.00228498	0.00758473	1	Y	Y	N	0	0	NA	NA	NA
chr3_119666115_119812440	-6.28111	-5.56547	0	0.00318667	0.00897194	1	0.0135221	0.0348963	1	Y	Y	N	0	0	NA	NA	NA
chr3_12343020_12353952	-7.05449	-6.33884	0	0.00081697	0.00263453	1	0.00557476	0.0153964	1	Y	Y	N	0	0	NA	NA	NA
chr3_124560230_124592378	0.813845	-6.8133	-7.62714	0.0881414	7.44171e-08	1.54283e-09	0.19914	1.56408e-06	7.457e-08	N	Y	Y	0	0	NA	NA	NA
chr3_124746049_124748332	-1.11665	-6.29587	-5.17922	0.444246	0.000705561	0.00555404	0.634139	0.00553432	0.0347193	N	Y	N	0	0	NA	NA	NA
chr3_127429419_127441409	-1.4263	-6.39346	-4.96716	0.328902	0.000575208	0.00787712	0.523166	0.00468299	0.0449063	N	Y	N	0	0	NA	NA	NA
chr3_129684544_129690951	6.37433	5.97519	-0.399138	0.000911293	0.00202111	0.79684	0.00604195	0.0124917	0.975039	Y	N	N	0	0	NA	NA	NA
chr3_132431970_132435753	0.141654	-3.17992	-3.32157	0.891671	0.0110095	0.00784492	0.946089	0.0384141	0.0447994	N	N	N	0	0	NA	NA	NA
chr3_136191255_136221621	-5.95585	0.239348	6.1952	0.00292836	0.884282	0.00202979	0.0129797	0.956093	0.0166938	Y	N	N	0	0	NA	NA	NA
chr3_138289160_138290198	8.65286	6.22049	-2.43237	6.14978e-09	3.92902e-05	0.0108049	1.72169e-07	0.000467718	0.0572882	Y	Y	N	0	0	NA	NA	NA
chr3_141231005_141259451	1.34538	-0.715531	-2.06091	0.00192279	0.131517	8.88226e-06	0.0103963	0.272139	0.00018572	Y	N	Y	0	0	NA	NA	NA
chr3_141272699_141278837	1.08669	-4.67282	-5.75951	0.368617	0.00527813	0.000523504	0.565501	0.0259078	0.0057525	N	N	N	0	0	NA	NA	NA
chr3_141811903_141820683	-1.56237	-1.92453	-0.362161	0.0011254	0.000215862	0.504641	0.00706038	0.00203177	0.772008	Y	Y	N	0	0	NA	NA	NA
chr3_142455221_142467302	-1.43127	-1.90783	-0.476569	3.1084e-07	6.99583e-11	0.110554	5.98282e-06	2.70773e-09	0.289855	Y	Y	N	0	0	NA	NA	NA
chr3_145820542_145828235	-5.92499	-5.20935	0	0.00369845	0.0107049	1	0.014651	0.0378735	NA	Y	N	N	0	0	NA	NA	NA
chr3_145820542_145842016	-6.43482	-5.71918	0	0.0019217	0.00583203	1	0.0103963	0.0277838	1	Y	Y	N	0	0	NA	NA	NA
chr3_149415493_149421115	-5.88386	-5.16821	0	0.00349735	0.0103153	1	0.0141796	0.0371822	NA	Y	N	N	0	0	NA	NA	NA
chr3_149563798_149619949	0.47243	-1.98648	-2.45891	0.194968	6.72726e-06	1.93604e-08	0.366011	9.58735e-05	7.59612e-07	N	Y	Y	0	0	NA	NA	NA
chr3_149563798_149639014	0.342483	-0.806376	-1.14886	0.144801	0.00106407	2.78789e-06	0.294466	0.00764385	6.68893e-05	N	N	Y	0	0	NA	NA	NA
chr3_156411809_156413814	-0.0268485	-0.458841	-0.431993	0.859781	0.004806	0.00796459	0.930313	0.0241823	0.0453275	N	N	N	0	0	NA	NA	NA
chr3_156638364_156660503	-5.9655	-5.24985	0	0.00297641	0.00895277	1	0.0130839	0.0348804	NA	Y	N	N	0	0	NA	NA	NA
chr3_167422630_167443261	-5.79789	-5.08225	0	0.00507025	0.0140253	1	0.0183513	0.0458215	NA	N	N	N	0	0	NA	NA	NA
chr3_168027093_168031964	-6.77305	-6.05741	0	0.00123735	0.00386677	1	0.00763178	0.0208326	1	Y	Y	N	0	0	NA	NA	NA
chr3_169863211_169867032	-2.26222	-2.51527	-0.253053	0.00609101	0.00279387	0.767213	0.0214001	0.0161429	0.96032	Y	N	N	0	0	NA	NA	NA
chr3_170906491_170912424	3.25574	3.73113	0.475385	0.00187379	0.000374591	0.619212	0.0102549	0.00329185	0.861164	N	Y	N	0	0	NA	NA	NA
chr3_179481790_179483636	-0.377496	-3.85109	-3.47359	0.550417	6.0695e-06	4.72778e-05	0.717446	8.75565e-05	0.000759863	N	Y	N	0	0	NA	NA	NA
chr3_18082941_18105554	0	6.72783	6.74394	1	0.0010999	0.00107003	1	0.00783763	0.0101523	N	Y	Y	0	0	NA	NA	NA
chr3_183056588_183107567	-0.818078	-5.99246	-5.17438	0.0315723	8.10533e-16	4.07702e-12	0.0837554	5.85817e-14	3.57812e-10	N	Y	Y	0	0	NA	NA	NA
chr3_183695305_183696439	1.10206	-5.4064	-6.50847	0.195971	0.00018335	5.74366e-06	0.36731	0.0017693	0.000128991	N	Y	Y	0	0	NA	NA	NA
chr3_185316200_185331196	0	6.72883	6.74493	1	0.00103856	0.0010101	1	0.00752929	0.00970798	N	Y	Y	0	0	NA	NA	NA
chr3_186509514_186510736	6.75549	7.61711	0.861619	7.74406e-07	2.44649e-08	0.228727	1.3577e-05	5.66292e-07	0.473011	Y	Y	N	0	0	NA	NA	NA
chr3_186522066_186522513	-6.14063	0.367823	6.50845	0.00390643	0.837312	0.00226	0.0151198	0.926387	0.0180313	N	N	N	0	0	NA	NA	NA
chr3_194877178_194947585	3.07376	2.19553	-0.87823	3.87781e-05	0.00422745	0.201916	0.000448067	0.0220819	0.435148	Y	N	N	0	0	NA	NA	NA
chr3_195016437_195022903	-0.0596928	-5.71913	-5.65944	0.955183	0.00027389	0.000318474	0.986665	0.00250436	0.00378649	N	Y	N	0	0	NA	NA	NA
chr3_195047614_195066046	-1.0879	-4.59323	-3.50533	0.0651492	5.19516e-07	0.000146286	0.154831	9.31578e-06	0.00196324	N	Y	N	0	0	NA	NA	NA
chr3_195101738_195112876	-0.584538	-1.895	-1.31046	0.0468506	1.21077e-08	9.7975e-05	0.116723	2.9572e-07	0.00143941	N	Y	Y	0	0	NA	NA	NA
chr3_195250490_195251694	6.25773	0	-5.55819	0.00229911	1	0.00677332	0.0117156	1	0.0403736	Y	N	N	0	0	NA	NA	NA
chr3_195605124_195615477	4.9745	3.94902	-1.02548	0.000901416	0.00918054	0.419411	0.00599505	0.0351903	0.693474	Y	N	N	0	0	NA	NA	NA
chr3_196778448_196793625	6.30272	0	-5.60318	0.0026738	1	0.00759337	0.0126127	1	0.043813	Y	N	N	0	0	NA	NA	NA
chr3_196807922_196846401	2.78735	0.314903	-2.47245	7.73909e-16	0.399864	2.67512e-12	5.83149e-14	0.588275	2.4782e-10	Y	N	Y	0	0	NA	NA	NA
chr3_196812451_196842954	1.89705	-0.685133	-2.58218	0.00011678	0.204722	9.03107e-07	0.00113464	0.375562	2.47991e-05	Y	N	Y	0	0	NA	NA	NA
chr3_196921296_197024655	-6.20318	-5.48753	0	0.00260422	0.00773106	1	0.0125084	0.0328012	1	Y	Y	N	0	0	NA	NA	NA
chr3_197009550_197009716	4.67355	4.45159	-0.221962	2.72812e-08	1.47963e-07	0.735467	6.55026e-07	2.96891e-06	0.939044	Y	Y	N	0	0	NA	NA	NA
chr3_197592294_197598333	0.0875211	-3.26617	-3.35369	0.912784	0.000862582	0.000617492	0.959064	0.00647109	0.00655717	N	Y	N	0	0	NA	NA	NA
chr3_197592294_197602646	1.38957	0.261014	-1.12855	6.78177e-06	0.422669	0.000339504	9.68454e-05	0.610599	0.00400795	Y	N	Y	0	0	NA	NA	NA
chr3_23250183_23258803	-6.51111	-5.79546	0	0.00249363	0.00710825	1	0.0122147	0.0313693	1	Y	Y	N	0	0	NA	NA	NA
chr3_23541099_23574192	0.130391	-2.10748	-2.23787	0.831672	0.00120367	0.000578851	0.911737	0.00840788	0.00620221	N	Y	Y	0	0	NA	NA	NA
chr3_23996028_23996294	-6.15407	-5.43842	0	0.00281601	0.00829619	1	0.0128554	0.0339697	NA	Y	Y	N	0	0	NA	NA	NA
chr3_29781211_29804480	-6.18579	-5.47014	0	0.00269504	0.00796853	1	0.0126502	0.0333797	1	Y	Y	N	0	0	NA	NA	NA
chr3_31617888_31641951	-0.294877	-2.4903	-2.19542	0.284898	6.22029e-14	4.48207e-11	0.474027	3.61134e-12	2.95994e-09	N	Y	Y	0	0	NA	NA	NA
chr3_31774749_31789612	1.25142	-4.86236	-6.11378	0.226269	0.00178944	7.33254e-05	0.406045	0.0114392	0.00111918	N	N	Y	0	0	NA	NA	NA
chr3_31774749_31921322	-5.90568	-5.19004	0	0.0033662	0.00997084	1	0.0138219	0.0365072	NA	Y	N	N	0	0	NA	NA	NA
chr3_3178944_3182332	-1.96578	-0.836888	1.12889	9.56109e-08	0.019408	0.00364468	2.01551e-06	0.0593041	0.0257521	Y	N	N	0	0	NA	NA	NA
chr3_31917925_31921322	-0.975761	-1.65034	-0.674578	8.51511e-05	2.48108e-10	0.0107401	0.000880475	8.57244e-09	0.0570354	Y	Y	N	0	0	NA	NA	NA
chr3_32479447_32483505	3.69847	2.72642	-0.972044	1.06985e-05	0.00150151	0.195204	0.000144338	0.00993943	0.42669	Y	N	N	0	0	NA	NA	NA
chr3_32774915_32778982	-2.4625	-1.94258	0.519918	4.53994e-06	0.00034425	0.364647	6.71323e-05	0.00304791	0.63568	Y	Y	N	0	0	NA	NA	NA
chr3_33725851_33731424	-1.78707	-3.01682	-1.22975	0.00509383	7.18703e-06	0.0707116	0.0184219	0.00010222	0.212262	Y	N	N	0	0	NA	NA	NA
chr3_33725851_33738425	-0.94825	0.0499226	0.998173	0.00260638	0.873089	0.00175078	0.0125084	0.949354	0.014914	N	N	N	0	0	NA	NA	NA
chr3_33863447_33870461	-6.54535	-5.8297	0	0.00148464	0.00465138	1	0.00866203	0.0236679	1	Y	Y	N	0	0	NA	NA	NA
chr3_36524484_36527741	-6.85923	-6.14359	0	0.000796477	0.00266383	1	0.00545594	0.0155419	1	Y	Y	N	0	0	NA	NA	NA
chr3_36570188_36576152	-6.81237	-6.09673	0	0.000860599	0.00285954	1	0.00581643	0.0164636	1	Y	Y	N	0	0	NA	NA	NA
chr3_37170554_37196147	-6.32404	-5.6084	0	0.0045532	0.0118693	1	0.0169828	0.0405549	1	N	Y	N	0	0	NA	NA	NA
chr3_38006062_38017385	6.19321	0	-5.49367	0.00255464	1	0.00745012	0.0123736	1	0.043201	Y	N	N	0	0	NA	NA	NA
chr3_40351362_40353660	-6.01808	-5.30244	0	0.00399662	0.0112082	1	0.0153348	0.0388585	NA	Y	N	N	0	0	NA	NA	NA
chr3_43591212_43607219	0.260349	-3.6423	-3.90265	0.684767	1.22447e-05	2.67554e-06	0.81516	0.00016583	6.51309e-05	N	Y	N	0	0	NA	NA	NA
chr3_4403723_4403938	-6.19904	-5.4834	0	0.0024371	0.00733744	1	0.0121236	0.0319379	1	Y	Y	N	0	0	NA	NA	NA
chr3_4403723_4452662	-7.09088	-6.37523	0	0.000349931	0.0013072	1	0.00283264	0.00896311	1	Y	Y	N	0	0	NA	NA	NA
chr3_4418014_4461830	-6.1226	-5.40696	0	0.00264694	0.00793889	1	0.0125899	0.0333213	NA	Y	Y	N	0	0	NA	NA	NA
chr3_45130546_45133030	5.68905	7.17544	1.48639	0.00276567	0.000150437	0.323722	0.0128118	0.00149236	0.588598	Y	Y	N	0	0	NA	NA	NA
chr3_47719688_47727660	1.29913	1.30836	0.0092267	0.0142788	0.0155698	0.985715	0.044495	0.0498559	1	N	N	N	0	0	NA	NA	NA
chr3_49928630_49929271	0	6.53582	6.55193	1	0.00398281	0.0038943	1	0.0211629	0.0271989	N	N	N	0	0	NA	NA	NA
chr3_51575514_51586079	-0.00817628	-2.14217	-2.13399	0.972266	7.25506e-13	8.80079e-13	0.998185	3.80226e-11	8.63254e-11	N	Y	Y	0	0	NA	NA	NA
chr3_5212188_5216099	-2.61959	-1.81153	0.808063	2.11348e-15	3.3083e-08	0.0234254	1.45338e-13	7.4154e-07	0.101328	Y	Y	N	0	0	NA	NA	NA
chr3_52446827_52448603	2.89417	1.82526	-1.06891	1.354e-10	0.000111267	0.00952673	4.92487e-09	0.00115897	0.0521702	Y	N	N	0	0	NA	NA	NA
chr3_53908238_53910107	2.35648	1.88109	-0.47539	2.88092e-08	1.61622e-05	0.231658	6.8246e-07	0.000212307	0.475759	Y	Y	N	0	0	NA	NA	NA
chr3_55038790_55052344	-6.51106	-5.79541	0	0.00166346	0.00512737	1	0.0094183	0.025411	1	Y	Y	N	0	0	NA	NA	NA
chr3_56694759_56707753	0.469257	-3.19671	-3.66597	0.497632	0.000171137	1.52819e-05	0.67736	0.00166965	0.000291229	N	Y	N	0	0	NA	NA	NA
chr3_57569625_57570191	-0.228098	-2.52945	-2.30135	0.686395	4.81564e-05	0.000222899	0.816687	0.000560085	0.00281046	N	Y	N	0	0	NA	NA	NA
chr3_60751257_60752831	9.13075	0	-8.4312	1.29539e-12	1	5.70702e-11	6.46146e-11	1	3.66017e-09	Y	N	Y	0	0	NA	NA	NA
chr3_63898264_63898901	0.498704	1.37423	0.875523	0.0905595	2.86238e-06	0.00247913	0.203371	4.42669e-05	0.019431	N	Y	N	0	0	NA	NA	NA
chr3_6759256_6774182	-6.62911	-5.91347	0	0.00124331	0.00397429	1	0.00765769	0.0211442	1	Y	Y	N	0	0	NA	NA	NA
chr3_68040704_68055887	-9.87628	-9.16063	0	8.57653e-16	8.47762e-14	1	6.39448e-14	4.80376e-12	1	Y	Y	N	0	0	NA	NA	NA
chr3_72830456_72842187	-0.397205	-6.06071	-5.6635	0.796943	0.00168868	0.00338785	0.890901	0.0109232	0.0243862	N	Y	N	0	0	NA	NA	NA
chr3_72873575_72893574	0.0332542	-5.06287	-5.09613	0.975855	0.00144963	0.0013417	0.998675	0.00965001	0.012209	N	N	N	0	0	NA	NA	NA
chr3_72881520_72893574	-0.43007	-2.34215	-1.91208	0.461949	0.000218002	0.00263412	0.646935	0.00204789	0.0203117	N	Y	N	0	0	NA	NA	NA
chr3_76399974_76403536	0	7.5459	7.562	1	8.29639e-05	8.0116e-05	1	0.000906842	0.00120626	N	Y	Y	0	0	NA	NA	NA
chr3_78987751_78988077	0	8.73587	8.75197	1	8.35923e-11	7.72113e-11	1	3.16623e-09	4.85435e-09	N	Y	Y	0	0	NA	NA	NA
chr3_81627076_81630426	-6.05277	-5.33713	0	0.00335602	0.00970117	1	0.0138202	0.036089	NA	Y	N	N	0	0	NA	NA	NA
chr3_8784145_8794910	-6.98883	-6.27319	0	0.000547662	0.00191975	1	0.00403212	0.0120226	1	Y	Y	N	0	0	NA	NA	NA
chr3_98600384_98600611	6.04878	5.50817	-0.540608	2.23579e-07	2.55785e-06	0.594645	4.39892e-06	3.98181e-05	0.845701	Y	Y	N	0	0	NA	NA	NA
chr3_98600384_98609300	5.54045	5.43483	-0.105619	3.45025e-12	1.12578e-11	0.82765	1.59727e-10	5.01501e-10	0.989855	Y	Y	N	0	0	NA	NA	NA
chr3_98600384_98611450	6.70151	6.12357	-0.577943	6.40303e-16	2.03646e-13	0.174446	4.87663e-14	1.10109e-11	0.395342	Y	Y	N	0	0	NA	NA	NA
chr4_102014933_102030235	-5.76587	-5.05022	0	0.00353753	0.0106283	1	0.0142528	0.0377183	NA	Y	N	N	0	0	NA	NA	NA
chr4_103635595_103647840	-0.149411	-2.63576	-2.48635	0.697297	5.74788e-08	3.2491e-07	0.824852	1.2337e-06	9.94106e-06	N	Y	Y	0	0	NA	NA	NA
chr4_103644028_103647840	-6.23698	-5.52134	0	0.00262826	0.00774458	1	0.0125699	0.0328276	1	Y	Y	N	0	0	NA	NA	NA
chr4_108603171_108608333	2.11445	-2.33515	-4.4496	0.0105703	0.0249295	1.35188e-05	0.0344068	0.0730396	0.000262888	Y	N	Y	0	0	NA	NA	NA
chr4_1102131_1105609	-4.56172	-7.57533	-3.01361	0.000515477	6.66062e-06	0.087021	0.00385907	9.53075e-05	0.246992	Y	Y	N	0	0	NA	NA	NA
chr4_110412483_110416012	0.423974	-2.10629	-2.53026	0.479095	0.00141864	0.000119411	0.660973	0.00954246	0.00168388	N	N	N	0	0	NA	NA	NA
chr4_114452372_114469885	-6.84531	-6.12967	0	0.000973566	0.00314436	1	0.00635555	0.0177039	1	Y	Y	N	0	0	NA	NA	NA
chr4_115299603_115315470	-6.30008	-5.58443	0	0.00223021	0.00672035	1	0.0114968	0.0305275	1	Y	Y	N	0	0	NA	NA	NA
chr4_115380370_115412085	-8.3268	-7.61116	0	8.42207e-09	1.4037e-07	1	2.29437e-07	2.83259e-06	1	Y	Y	N	0	0	NA	NA	NA
chr4_120166492_120170037	-6.77111	-1.5239	5.24721	0.000415207	0.330699	0.00716108	0.00323889	0.519943	0.0418643	N	N	N	0	0	NA	NA	NA
chr4_1219148_1235307	0.167659	0.655266	0.487607	0.150141	2.47451e-08	2.94729e-05	0.303235	5.7091e-07	0.000502773	N	N	N	0	0	NA	NA	NA
chr4_1221987_1235307	-1.8772	-0.309854	1.56735	1.36281e-10	0.27028	1.62768e-07	4.92487e-09	0.453863	5.4361e-06	Y	N	Y	0	0	NA	NA	NA
chr4_123900387_124011860	-0.143966	-5.93391	-5.78995	0.875083	5.95238e-05	9.07546e-05	0.938554	0.000675652	0.00135119	N	Y	N	0	0	NA	NA	NA
chr4_123949341_124011860	-6.67468	-5.95904	0	0.0012159	0.00387377	1	0.00752158	0.0208336	1	Y	Y	N	0	0	NA	NA	NA
chr4_128842679_128861152	-0.649851	-4.36365	-3.7138	0.27059	1.95871e-06	5.61036e-05	0.459393	3.13881e-05	0.000878429	N	Y	N	0	0	NA	NA	NA
chr4_139100371_139106398	-7.05024	-6.3346	0	0.000387158	0.00143026	1	0.00307771	0.00955713	1	Y	Y	N	0	0	NA	NA	NA
chr4_139135739_139144478	-7.65336	-6.93772	0	1.12033e-05	6.83929e-05	1	0.000150575	0.000767713	1	Y	Y	N	0	0	NA	NA	NA
chr4_139135739_139153536	-6.15962	-5.44398	0	0.00246333	0.00745	1	0.0121842	0.0321171	1	Y	Y	N	0	0	NA	NA	NA
chr4_140058784_140060651	-2.32054	-8.5833	-6.26276	0.172312	3.12355e-05	0.00244628	0.335577	0.000379487	0.0191961	N	Y	N	0	0	NA	NA	NA
chr4_141330991_141334241	-5.87011	-5.15447	0	0.00289759	0.00891509	1	0.0129606	0.0347909	NA	Y	N	N	0	0	NA	NA	NA
chr4_141868808_141889027	-5.99973	-5.28408	0	0.00279327	0.00846297	1	0.0128554	0.0342582	NA	Y	N	N	0	0	NA	NA	NA
chr4_144449021_144449867	-5.94859	-5.23295	0	0.00328005	0.00969627	1	0.0136834	0.036089	NA	Y	N	N	0	0	NA	NA	NA
chr4_146767108_146770713	2.14573	0.49183	-1.6539	5.34583e-09	0.213274	8.93773e-06	1.50855e-07	0.386749	0.000186221	Y	N	Y	0	0	NA	NA	NA
chr4_148778704_148803083	0.205843	-2.85077	-3.05661	0.647412	7.01637e-07	9.68519e-08	0.788463	1.22406e-05	3.418e-06	N	Y	Y	0	0	NA	NA	NA
chr4_148860976_148876525	-1.00285	-1.09465	-0.0918027	0.00812348	0.00451126	0.813783	0.0271938	0.0232202	0.983113	Y	Y	N	0	0	NA	NA	NA
chr4_151656410_151729550	1.52627	1.23064	-0.295632	4.60178e-06	0.000308112	0.364317	6.77639e-05	0.00277301	0.635293	Y	N	N	0	0	NA	NA	NA
chr4_154236637_154237151	1.40534	-5.50788	-6.91322	0.0759164	9.65351e-05	8.06992e-07	0.176764	0.00103131	2.24276e-05	N	Y	Y	0	0	NA	NA	NA
chr4_169812073_169825057	-6.12429	-5.40864	0	0.00267461	0.0080026	1	0.0126127	0.0335002	NA	Y	N	N	0	0	NA	NA	NA
chr4_169812073_169837178	-6.78022	-6.06458	0	0.0018629	0.00538799	1	0.0102128	0.026211	1	Y	Y	N	0	0	NA	NA	NA
chr4_170501993_170511960	1.10806	1.20953	0.101472	0.0156945	0.00941566	0.821474	0.0483954	0.0356828	0.987071	N	N	N	0	0	NA	NA	NA
chr4_174213259_174225269	0	6.96018	6.97629	1	0.00189013	0.00184478	1	0.0119003	0.0155363	N	Y	Y	0	0	NA	NA	NA
chr4_177632653_177650900	-6.98643	-6.27078	0	0.000462809	0.00167371	1	0.00353622	0.0108462	1	Y	Y	N	0	0	NA	NA	NA
chr4_17910717_17974508	-0.483789	-5.47286	-4.98907	0.698752	0.00125473	0.00338195	0.825687	0.00869961	0.0243862	N	Y	N	0	0	NA	NA	NA
chr4_17963526_17974508	-0.844692	-1.03357	-0.188874	0.000286232	1.5687e-05	0.436073	0.00239926	0.000207685	0.70857	N	Y	N	0	0	NA	NA	NA
chr4_184749331_184751143	-6.85069	-6.13505	0	0.000694534	0.00238614	1	0.00489979	0.0142145	1	Y	Y	N	0	0	NA	NA	NA
chr4_185637551_185638350	2.49072	3.37936	0.888637	0.00187871	2.3531e-05	0.21262	0.0102677	0.000294991	0.449929	N	Y	N	0	0	NA	NA	NA
chr4_186168448_186188309	2.20865	0.165321	-2.04333	7.88172e-28	0.438035	3.64732e-23	1.59504e-25	0.624517	9.01023e-21	Y	N	Y	0	0	NA	NA	NA
chr4_186168448_186209236	2.33615	-0.639048	-2.97519	0.000566216	0.400697	4.92629e-05	0.00413438	0.588936	0.000784445	Y	N	Y	0	0	NA	NA	NA
chr4_186168448_186231970	6.41988	0	-5.72034	0.00199166	1	0.00587644	0.0106369	1	0.0361879	Y	N	N	0	0	NA	NA	NA
chr4_39739040_39757359	-1.10321	-6.3883	-5.28509	0.458641	0.000690931	0.00519217	0.644133	0.00544974	0.0329513	N	Y	N	0	0	NA	NA	NA
chr4_39843568_39847500	0.131075	1.97811	1.84704	0.853342	0.00389404	0.0066453	0.926743	0.0209162	0.039717	N	N	N	0	0	NA	NA	NA
chr4_39900009_39904080	1.28029	2.47966	1.19937	0.0129505	1.14527e-06	0.0126387	0.040859	1.9132e-05	0.0646972	N	Y	N	0	0	NA	NA	NA
chr4_4088385_4089120	0	7.25649	7.27259	1	0.000119652	0.000115561	1	0.00123541	0.00164293	N	Y	Y	0	0	NA	NA	NA
chr4_41496553_41553412	-8.7348	-8.01915	0	1.12841e-10	3.21311e-09	1	4.29707e-09	8.96002e-08	1	Y	Y	N	0	0	NA	NA	NA
chr4_41496553_41601043	-6.62195	-5.9063	0	0.00145835	0.00452733	1	0.00856508	0.0232202	1	Y	Y	N	0	0	NA	NA	NA
chr4_41600937_41621457	-5.82941	-5.11376	0	0.00328464	0.00991257	1	0.0136834	0.0364542	NA	Y	N	N	0	0	NA	NA	NA
chr4_42020128_42025401	-6.87707	-6.16143	0	0.000670018	0.00230685	1	0.00476002	0.0138119	1	Y	Y	N	0	0	NA	NA	NA
chr4_48552609_48553595	4.44431	-1.71005	-6.15436	0.013112	0.423492	0.00179949	0.0412582	0.611165	0.0152417	Y	N	Y	0	0	NA	NA	NA
chr4_52729603_52744020	-0.999414	0.53162	1.53103	0.0119341	0.165227	0.000127234	0.0381503	0.321777	0.00175705	N	N	Y	0	0	NA	NA	NA
chr4_76898799_76903190	-2.42545	4.39251	6.81796	0.258935	0.0153455	0.000613052	0.446781	0.0493382	0.00652162	N	Y	Y	0	0	NA	NA	NA
chr4_7787921_7811490	-6.05002	-5.33438	0	0.00338365	0.009769	1	0.0138534	0.0361514	NA	Y	N	N	0	0	NA	NA	NA
chr4_7795408_7811490	-6.29157	-5.57593	0	0.00238271	0.00709594	1	0.0119608	0.0313345	1	N	Y	N	0	0	NA	NA	NA
chr4_7840251_7857301	-7.09201	-6.37636	0	0.000360125	0.00133805	1	0.00289531	0.00913926	1	Y	Y	N	0	0	NA	NA	NA
chr4_7857193_7873807	-8.08333	-7.36769	0	1.00317e-07	1.20626e-06	1	2.10221e-06	2.00561e-05	1	Y	Y	N	0	0	NA	NA	NA
chr4_78694235_78697546	-0.23869	-1.49761	-1.25892	0.229909	7.47387e-11	5.34728e-08	0.410808	2.87704e-09	2.01505e-06	N	Y	Y	0	0	NA	NA	NA
chr4_7870349_7873807	-2.17557	-1.9198	0.255773	1.3722e-21	2.89015e-16	0.30295	1.76715e-19	2.27455e-14	0.563496	Y	Y	N	0	0	NA	NA	NA
chr4_79158664_79166479	5.81941	6.32702	0.507608	0.015937	0.00883604	0.811249	0.0490363	0.0347071	0.983113	N	Y	N	0	0	NA	NA	NA
chr4_79158664_79173705	6.29663	7.23319	0.936564	0.000566788	7.37652e-05	0.506741	0.00413438	0.000816373	0.773205	N	Y	N	0	0	NA	NA	NA
chr4_79158664_79176529	7.43702	5.7448	-1.69222	3.46123e-05	0.00161266	0.225874	0.000407542	0.0105373	0.46977	Y	N	N	0	0	NA	NA	NA
chr4_79186179_79188586	7.9392	8.57087	0.631677	1.67873e-09	7.82102e-11	0.295249	5.14737e-08	2.98915e-09	0.554806	Y	Y	N	0	0	NA	NA	NA
chr4_85800559_85853516	-1.06696	-6.86677	-5.79981	0.41412	8.49897e-05	0.000940767	0.605411	0.000927553	0.0091736	N	Y	N	0	0	NA	NA	NA
chr4_85818064_85853516	-1.06965	-5.58065	-4.511	0.0583201	2.08733e-08	6.52592e-06	0.140839	4.87939e-07	0.000143184	Y	Y	Y	0	0	NA	NA	NA
chr4_89052213_89061166	-6.07476	-5.35912	0	0.00286287	0.00851884	1	0.0128858	0.03429	NA	Y	Y	N	0	0	NA	NA	NA
chr4_89396992_89400658	-6.27121	-5.55557	0	0.00281885	0.00814529	1	0.0128554	0.0336597	1	Y	Y	N	0	0	NA	NA	NA
chr4_95539155_95561601	-6.3821	-5.66646	0	0.00269879	0.00772859	1	0.0126502	0.0328012	1	Y	Y	N	0	0	NA	NA	NA
chr4_9642695_9643074	9.31752	0	-8.61797	2.52163e-13	1	1.30283e-11	1.35308e-11	1	9.87483e-10	Y	N	Y	0	0	NA	NA	NA
chr5_102231555_102237117	0	7.55589	7.57199	1	1.57899e-05	1.51462e-05	1	0.000208268	0.00028947	N	Y	Y	0	0	NA	NA	NA
chr5_1032267_1038837	0	6.49726	6.51337	1	0.00262458	0.00256103	1	0.0153509	0.0198151	N	Y	Y	0	0	NA	NA	NA
chr5_107521818_107684231	-1.25264	0.183924	1.43657	6.20914e-06	0.493586	3.19567e-07	8.93889e-05	0.672709	9.82265e-06	Y	N	Y	0	0	NA	NA	NA
chr5_108203468_108219219	0.194532	-6.40466	-6.59919	0.837439	2.06574e-05	1.13064e-05	0.91565	0.000263633	0.000227817	N	Y	Y	0	0	NA	NA	NA
chr5_108219097_108295048	-6.5884	-5.87275	0	0.00214075	0.00620944	1	0.0111492	0.0289733	1	Y	Y	N	0	0	NA	NA	NA
chr5_108281831_108295048	-2.10633	-4.06368	-1.95735	0.00354231	8.14526e-07	0.0194279	0.0142558	1.41404e-05	0.0883328	Y	N	N	0	0	NA	NA	NA
chr5_111570331_111576507	-1.57177	-6.68198	-5.11021	0.247972	0.000175534	0.00437726	0.434105	0.0017055	0.029138	N	Y	N	0	0	NA	NA	NA
chr5_111594926_111602027	0.26566	-7.96777	-8.23343	0.407425	6.0153e-11	1.33076e-11	0.599274	2.36702e-09	9.97322e-10	N	Y	Y	0	0	NA	NA	NA
chr5_111594926_111616020	-0.118999	-5.64563	-5.52663	0.940091	0.00398594	0.00484319	0.977347	0.0211637	0.0315162	N	Y	N	0	0	NA	NA	NA
chr5_111595588_111602027	0.396602	-5.43598	-5.83258	0.808763	0.0067892	0.00362246	0.896405	0.0307487	0.0256223	N	Y	N	0	0	NA	NA	NA
chr5_112868576_112871495	-0.490131	-3.46022	-2.97009	0.566905	0.00103425	0.00503261	0.729358	0.00751342	0.0323067	N	Y	N	0	0	NA	NA	NA
chr5_118264232_118274985	-5.81043	-5.09479	0	0.00392858	0.0114502	1	0.0151724	0.0394655	NA	Y	N	N	0	0	NA	NA	NA
chr5_118264232_118280344	-2.13015	-2.73557	-0.605418	2.82731e-10	5.46673e-13	0.129114	9.58174e-09	2.91134e-11	0.322182	Y	Y	N	0	0	NA	NA	NA
chr5_122868263_122893258	-6.01567	-5.30003	0	0.00347375	0.0100322	1	0.0141162	0.0366089	NA	Y	N	N	0	0	NA	NA	NA
chr5_122881111_122893258	0.115421	-1.51691	-1.63233	0.633975	9.46452e-08	8.36775e-09	0.779727	1.9659e-06	3.62421e-07	N	Y	Y	0	0	NA	NA	NA
chr5_127782174_127800614	-5.83841	-5.12277	0	0.00353497	0.0104857	1	0.0142505	0.037397	NA	Y	N	N	0	0	NA	NA	NA
chr5_127782174_127855061	-5.87932	-5.16368	0	0.00301229	0.00917684	1	0.0131634	0.0351903	NA	Y	N	N	0	0	NA	NA	NA
chr5_127782174_127866386	-8.98196	-8.26632	0	7.37995e-12	2.89477e-10	1	3.24672e-10	9.77986e-09	1	Y	Y	N	0	0	NA	NA	NA
chr5_127800417_127866386	-7.10208	-6.38644	0	0.000389609	0.00142466	1	0.00308583	0.00955577	1	Y	Y	N	0	0	NA	NA	NA
chr5_127854966_127863660	-6.62011	-5.90446	0	0.00138887	0.00435327	1	0.00828058	0.0226057	1	Y	Y	N	0	0	NA	NA	NA
chr5_127854966_127866386	-8.38242	-7.66677	0	3.95861e-09	7.30888e-08	1	1.15386e-07	1.54074e-06	1	Y	Y	N	0	0	NA	NA	NA
chr5_130883740_130940386	0.320464	-2.08353	-2.40399	0.618905	0.00267382	0.00051479	0.767724	0.0155618	0.00568485	N	N	N	0	0	NA	NA	NA
chr5_131013396_131034695	0.774792	-5.88646	-6.66125	0.305713	2.34248e-05	1.53435e-06	0.496757	0.000294181	3.9977e-05	N	Y	Y	0	0	NA	NA	NA
chr5_131013396_131044965	-0.165907	-4.51876	-4.35285	0.828646	0.000341873	0.000567962	0.909969	0.00303065	0.00613591	N	Y	N	0	0	NA	NA	NA
chr5_134388144_134411078	-1.47983	-1.29198	0.187849	0.000366404	0.00236283	0.668391	0.00293439	0.0140993	0.894676	Y	N	N	0	0	NA	NA	NA
chr5_135483521_135489852	1.57786	-0.0712532	-1.64911	0.000128103	0.872259	0.000117808	0.0012212	0.948596	0.00166729	Y	N	Y	0	0	NA	NA	NA
chr5_137027974_137045545	-6.7359	-6.02026	0	0.00113931	0.00363775	1	0.00710361	0.0198202	1	Y	Y	N	0	0	NA	NA	NA
chr5_137041681_137045545	-5.77993	-5.06429	0	0.00448624	0.012777	1	0.0167772	0.0426482	NA	N	N	N	0	0	NA	NA	NA
chr5_137342679_137347634	0.270045	-5.37383	-5.64387	0.869648	0.00757418	0.00498287	0.935776	0.0324549	0.032174	N	Y	N	0	0	NA	NA	NA
chr5_137342679_137354835	-6.34237	-5.62673	0	0.00262109	0.0075969	1	0.0125525	0.0324769	1	Y	N	N	0	0	NA	NA	NA
chr5_137353991_137354835	-6.08493	-5.36929	0	0.00380853	0.0106712	1	0.0148873	0.0378381	NA	Y	Y	N	0	0	NA	NA	NA
chr5_138614016_138614818	1.41716	1.29672	-0.120443	0.0016746	0.00450032	0.786385	0.00946623	0.0231902	0.969714	Y	N	N	0	0	NA	NA	NA
chr5_140961879_140963182	2.40758	1.38333	-1.02425	1.30202e-06	0.00767179	0.0322131	2.18019e-05	0.0326362	0.127062	Y	N	N	0	0	NA	NA	NA
chr5_141511373_141524241	1.87541	-5.33746	-7.21288	0.017805	0.000159591	2.51365e-07	0.0538283	0.00156998	7.87138e-06	Y	N	Y	0	0	NA	NA	NA
chr5_141843535_141847396	7.95376	4.88466	-3.06911	1.66493e-05	0.0100897	0.0399596	0.00021248	0.036743	0.148047	N	N	N	0	0	NA	NA	NA
chr5_142416761_142437312	1.38715	1.44967	0.06252	1.58205e-05	8.84383e-06	0.841131	0.000203369	0.000123066	0.996525	Y	Y	N	0	0	NA	NA	NA
chr5_14270934_14280545	-6.66689	0.749865	7.41675	6.74058e-06	0.4138	5.45651e-07	9.64516e-05	0.602427	1.57554e-05	Y	N	Y	0	0	NA	NA	NA
chr5_142779221_142780417	-9.94444	-9.2288	0	1.20398e-15	1.10219e-13	1	8.61396e-14	6.19589e-12	1	Y	Y	N	0	0	NA	NA	NA
chr5_145197457_145205763	8.84238	7.82504	-1.01734	2.17159e-11	3.81421e-09	0.100799	8.99496e-10	1.04713e-07	0.272973	Y	Y	N	0	0	NA	NA	NA
chr5_146070691_146080705	-6.04742	-5.33178	0	0.00396157	0.0110774	1	0.0152437	0.0385317	NA	Y	N	N	0	0	NA	NA	NA
chr5_1488506_1501718	-3.66918	-3.27413	0.39505	4.58976e-46	6.96721e-34	0.204152	1.91231e-43	2.1456e-31	0.438149	Y	Y	N	0	0	NA	NA	NA
chr5_1494815_1501718	-6.40176	-1.1102	5.29156	0.000750419	0.471584	0.00608258	0.00522124	0.652516	0.0369925	Y	N	N	0	0	NA	NA	NA
chr5_154330381_154346797	3.04092	4.54844	1.50753	4.85072e-05	8.49161e-10	0.0126508	0.00054536	2.63798e-08	0.0647093	Y	N	N	0	0	NA	NA	NA
chr5_158368702_158368987	-5.77183	-5.05619	0	0.00352716	0.0105924	1	0.0142505	0.0376636	NA	N	N	N	0	0	NA	NA	NA
chr5_158608968_158630664	-7.73614	-7.0205	0	3.83043e-06	2.75335e-05	1	5.80688e-05	0.000339165	1	Y	Y	N	0	0	NA	NA	NA
chr5_158621724_158630664	-4.2892	-3.82096	0.468238	5.67848e-07	1.12906e-05	0.615483	1.02604e-05	0.000153791	0.858484	Y	Y	N	0	0	NA	NA	NA
chr5_167986037_167993271	1.40692	-4.69478	-6.1017	0.276365	0.0069448	0.00039787	0.464442	0.0310936	0.00458341	N	N	Y	0	0	NA	NA	NA
chr5_167995651_167996003	-6.8592	-6.14356	0	0.000746243	0.00252617	1	0.00520753	0.0148859	1	Y	Y	N	0	0	NA	NA	NA
chr5_170305101_170308900	-3.16371	-3.22641	-0.0626908	0.00139623	0.00142927	0.951855	0.00831747	0.00955713	1	N	Y	N	0	0	NA	NA	NA
chr5_170305101_170319557	-0.593924	-6.43157	-5.83765	0.683961	0.000561396	0.00177769	0.814961	0.00459165	0.015124	N	Y	N	0	0	NA	NA	NA
chr5_170308810_170323119	-5.95979	-5.24415	0	0.00312654	0.00931747	1	0.0134437	0.0354815	NA	Y	N	N	0	0	NA	NA	NA
chr5_170336665_170351554	-1.24858	-6.20873	-4.96014	0.403883	0.000985195	0.00888313	0.597297	0.00722374	0.0493754	N	Y	N	0	0	NA	NA	NA
chr5_170346445_170395381	-1.53135	-6.78501	-5.25367	0.282217	0.000212045	0.00435069	0.470782	0.00200522	0.0290746	N	Y	N	0	0	NA	NA	NA
chr5_170585338_170597207	-0.306186	-3.65422	-3.34804	0.709147	0.00069962	0.0019477	0.832017	0.0054999	0.0161257	N	Y	N	0	0	NA	NA	NA
chr5_170610199_170632616	-0.457701	-1.78068	-1.32298	0.0206416	3.36252e-16	1.78256e-09	0.0611735	2.56094e-14	8.43237e-08	N	Y	Y	0	0	NA	NA	NA
chr5_170610203_170632616	-0.335835	-1.41295	-1.07711	0.261609	9.89316e-06	0.000801955	0.450139	0.000136065	0.00801583	N	Y	N	0	0	NA	NA	NA
chr5_170640623_170669824	-6.51372	-5.79808	0	0.00163278	0.00504874	1	0.00928168	0.0251655	1	Y	Y	N	0	0	NA	NA	NA
chr5_172359439_172362313	-0.169714	-5.83416	-5.66445	0.883824	0.000375981	0.000560694	0.942245	0.00329997	0.00607869	N	Y	N	0	0	NA	NA	NA
chr5_176370336_176385155	-0.110697	-1.04381	-0.933109	0.498044	6.04484e-10	3.24516e-08	0.677742	1.93736e-08	1.24398e-06	N	Y	N	0	0	NA	NA	NA
chr5_176562088_176619020	-5.97259	1.27861	7.25121	0.000232194	0.259447	7.24568e-06	0.0020279	0.44226	0.000154405	Y	N	Y	0	0	NA	NA	NA
chr5_179688684_179707608	-1.75953	-2.04382	-0.284287	1.66802e-09	2.02702e-11	0.36473	5.13677e-08	8.80819e-10	0.63568	Y	Y	N	0	0	NA	NA	NA
chr5_24060288_24062089	-6.26932	-5.55368	0	0.00233193	0.00700037	1	0.0117811	0.0311259	1	Y	Y	N	0	0	NA	NA	NA
chr5_31431683_31451747	-6.45423	0.286561	6.74079	2.82567e-05	0.779381	1.30199e-05	0.000340378	0.884764	0.000254672	Y	N	Y	0	0	NA	NA	NA
chr5_32121601_32143986	-6.15701	-5.44137	0	0.00312983	0.00902092	1	0.0134437	0.0349007	NA	Y	Y	N	0	0	NA	NA	NA
chr5_32135678_32143986	-2.39534	-2.56851	-0.173172	2.54748e-78	2.06171e-77	0.23828	2.57769e-75	3.65078e-74	0.483811	Y	Y	N	0	0	NA	NA	NA
chr5_32724804_32739136	-7.49063	-6.77498	0	2.66471e-05	0.000145235	1	0.000324298	0.00145091	1	Y	Y	N	0	0	NA	NA	NA
chr5_34175550_34179202	-7.89099	-2.03638	5.85461	5.63583e-05	0.202947	0.0031431	0.000622755	0.373368	0.0231908	Y	N	N	0	0	NA	NA	NA
chr5_34175927_34182972	-7.92804	-7.2124	0	5.28077e-07	5.04145e-06	1	9.73585e-06	7.40842e-05	1	Y	Y	N	0	0	NA	NA	NA
chr5_37115062_37120442	-6.00768	-5.29204	0	0.00300637	0.00895828	1	0.0131574	0.0348826	NA	Y	N	N	0	0	NA	NA	NA
chr5_37142412_37148370	-7.19524	-6.47959	0	0.00040085	0.00143518	1	0.00315469	0.00958095	1	Y	Y	N	0	0	NA	NA	NA
chr5_37153842_37154095	-6.27748	-5.56184	0	0.00410619	0.0109995	1	0.0156631	0.038398	1	Y	Y	N	0	0	NA	NA	NA
chr5_37173857_37176088	-5.8463	-5.13065	0	0.00516266	0.0141135	1	0.0185809	0.0460248	NA	Y	N	N	0	0	NA	NA	NA
chr5_37213661_37224842	-7.65272	-4.05683	3.59589	1.39023e-05	0.0065491	0.0578866	0.000184056	0.0300436	0.185004	N	Y	N	0	0	NA	NA	NA
chr5_37238959_37239971	-4.11516	-4.58951	-0.474355	0.00459975	0.00302727	0.768951	0.0171114	0.0172503	0.961271	Y	Y	N	0	0	NA	NA	NA
chr5_37238959_37243221	-6.09165	-5.37601	0	0.0029759	0.00876011	1	0.0130839	0.0345668	NA	Y	Y	N	0	0	NA	NA	NA
chr5_37243115_37247847	-7.60188	-1.92507	5.67682	4.64252e-06	0.114544	0.000781936	6.82219e-05	0.244658	0.00791275	Y	N	N	0	0	NA	NA	NA
chr5_37331787_37341344	-5.0279	2.17572	7.20362	0.00670191	0.13264	8.581e-05	0.0231108	0.273984	0.00128619	N	N	Y	0	0	NA	NA	NA
chr5_37342651_37358253	-6.20727	-5.49163	0	0.00304996	0.00876493	1	0.0132697	0.0345668	1	Y	Y	N	0	0	NA	NA	NA
chr5_37351292_37358253	-6.1117	-5.39606	0	0.00282953	0.00838723	1	0.0128554	0.0342205	NA	Y	Y	N	0	0	NA	NA	NA
chr5_37605166_37605340	-6.2673	-5.55166	0	0.00232622	0.00698899	1	0.011769	0.0311259	1	Y	Y	N	0	0	NA	NA	NA
chr5_38510566_38530768	-5.79906	-5.08342	0	0.00518653	0.0142751	1	0.0186573	0.0464874	NA	N	N	N	0	0	NA	NA	NA
chr5_38523521_38530768	-10.4402	-9.72454	0	1.58492e-17	2.07633e-15	1	1.42101e-15	1.4141e-13	1	Y	Y	N	0	0	NA	NA	NA
chr5_38527257_38530768	-7.3339	-6.61825	0	8.4171e-05	0.000387436	1	0.000875453	0.00337956	1	Y	Y	N	0	0	NA	NA	NA
chr5_38971979_38978752	-6.73768	0.290257	7.02794	1.90744e-06	0.721076	7.28203e-07	3.07753e-05	0.847277	2.0581e-05	Y	N	Y	0	0	NA	NA	NA
chr5_38991051_38996984	-6.1529	-0.55513	5.59777	0.00163463	0.72845	0.00454	0.00928476	0.851858	0.0298932	Y	N	N	0	0	NA	NA	NA
chr5_41927115_41930019	-7.28522	-0.677823	6.6074	2.38165e-05	0.597518	0.000140316	0.00029389	0.754004	0.00189455	Y	N	N	0	0	NA	NA	NA
chr5_43292576_43297268	-5.53357	-3.82332	1.71025	0.000148712	0.00522985	0.266834	0.00139145	0.0257422	0.519038	Y	N	N	0	0	NA	NA	NA
chr5_54941617_54952602	-6.14084	-5.42519	0	0.00450623	0.0120953	1	0.0168342	0.0410892	NA	Y	Y	N	0	0	NA	NA	NA
chr5_54941617_54960691	-6.82302	-6.10737	0	0.000760227	0.00258046	1	0.00526362	0.0151178	1	Y	Y	N	0	0	NA	NA	NA
chr5_56152427_56161804	1.28343	-3.47642	-4.75985	0.178663	0.0121258	0.000529726	0.344064	0.0411731	0.00581131	N	N	Y	0	0	NA	NA	NA
chr5_56160561_56161804	0.600199	-0.423862	-1.02406	0.000846025	0.0339905	1.63002e-07	0.00573984	0.0934905	5.4361e-06	N	N	N	0	0	NA	NA	NA
chr5_58476421_58511794	-8.32141	-6.96056	1.36085	4.31199e-06	0.000101202	0.460943	6.42986e-05	0.00107468	0.731673	Y	Y	N	0	0	NA	NA	NA
chr5_58481015_58511794	-6.36131	-5.64567	0	0.00246565	0.00721119	1	0.0121872	0.0316462	1	Y	Y	N	0	0	NA	NA	NA
chr5_59982789_59983665	5.51027	6.88011	1.36984	0.00333044	0.000232396	0.354421	0.0137912	0.00216302	0.623086	N	Y	N	0	0	NA	NA	NA
chr5_619105_624694	-1.97712	-0.326098	1.65103	7.77799e-08	0.345532	1.38678e-05	1.65938e-06	0.535537	0.000267336	Y	N	Y	0	0	NA	NA	NA
chr5_647920_655699	-4.64639	-1.00116	3.64524	4.11758e-06	0.219769	0.000386218	6.17899e-05	0.394329	0.00448793	Y	N	N	0	0	NA	NA	NA
chr5_64863340_64868113	-5.83841	-5.12277	0	0.00353497	0.0104857	1	0.0142505	0.037397	NA	Y	N	N	0	0	NA	NA	NA
chr5_65307877_65324171	-6.00025	-5.28461	0	0.0031164	0.0092289	1	0.0134185	0.0352961	NA	Y	N	N	0	0	NA	NA	NA
chr5_6737623_6746540	-2.66439	-0.213108	2.45129	9.44751e-26	0.346521	3.109e-21	1.5562e-23	0.5366	6.91233e-19	Y	N	Y	0	0	NA	NA	NA
chr5_68470704_68471364	-0.486414	-0.533151	-0.0467368	0.0107016	0.00613696	0.811655	0.0347704	0.0287678	0.983113	N	N	N	0	0	NA	NA	NA
chr5_71579332_71609985	-6.37673	-5.66109	0	0.0025348	0.00735507	1	0.0123149	0.0319379	1	Y	Y	N	0	0	NA	NA	NA
chr5_72144212_72151750	-7.83149	-2.53623	5.29526	1.15105e-06	0.0298084	0.00136117	1.95046e-05	0.0840833	0.0123524	Y	N	N	0	0	NA	NA	NA
chr5_72151601_72171564	-7.29776	-6.58211	0	0.000200886	0.000798512	1	0.00180111	0.0061188	1	Y	Y	N	0	0	NA	NA	NA
chr5_73136305_73136585	-1.36967	-2.12471	-0.75504	1.03323e-06	7.99255e-12	0.0184714	1.77725e-05	3.67605e-10	0.0850339	Y	Y	N	0	0	NA	NA	NA
chr5_76621364_76633140	-6.13643	-5.42079	0	0.00380436	0.0105747	1	0.0148792	0.0376197	NA	Y	Y	N	0	0	NA	NA	NA
chr5_76745585_76760634	-0.940842	-1.16673	-0.225892	5.39197e-07	3.80816e-09	0.266076	9.85872e-06	1.04713e-07	0.518293	N	Y	N	0	0	NA	NA	NA
chr5_78324256_78329231	-6.79035	-6.0747	0	0.00104128	0.00335124	1	0.00670493	0.0186026	1	Y	Y	N	0	0	NA	NA	NA
chr5_78338106_78340375	-6.48958	-5.77394	0	0.00176646	0.00540086	1	0.00985361	0.0262555	1	Y	Y	N	0	0	NA	NA	NA
chr5_78399987_78417175	-6.03671	-5.32107	0	0.00432235	0.011892	1	0.0162586	0.040613	NA	Y	N	N	0	0	NA	NA	NA
chr5_78399987_78419286	-5.87875	-5.16311	0	0.00316961	0.00955362	1	0.0135162	0.035966	NA	Y	N	N	0	0	NA	NA	NA
chr5_78415060_78419286	-6.58457	-5.86892	0	0.00170582	0.00517049	1	0.00959674	0.0255032	1	Y	Y	N	0	0	NA	NA	NA
chr5_78416164_78419286	-7.61758	-6.90194	0	1.31575e-05	7.87734e-05	1	0.000174521	0.000865041	1	Y	Y	N	0	0	NA	NA	NA
chr5_78742876_78752841	0	6.43376	6.44987	1	0.00700021	0.00685993	1	0.0311259	0.0407262	N	Y	N	0	0	NA	NA	NA
chr5_79498705_79501179	7.12189	6.95818	-0.163711	6.6839e-06	1.18467e-05	0.879318	9.58341e-05	0.000161056	1	Y	Y	N	0	0	NA	NA	NA
chr5_79974746_80048075	-6.29893	-5.58329	0	0.00216979	0.00657537	1	0.0112673	0.0301251	1	Y	N	N	0	0	NA	NA	NA
chr5_80419412_80422982	-7.17986	-1.81615	5.36371	5.90469e-05	0.194345	0.00324062	0.000645415	0.362456	0.0236229	Y	Y	N	0	0	NA	NA	NA
chr5_80908381_80946158	-6.16765	-5.45201	0	0.00273122	0.00807811	1	0.0127271	0.0336019	1	Y	Y	N	0	0	NA	NA	NA
chr5_83356119_83362425	-6.96344	-6.24779	0	0.000474992	0.00171653	1	0.00360558	0.011073	1	Y	Y	N	0	0	NA	NA	NA
chr5_95084037_95103870	-4.24226	-6.42255	-2.1803	0.0144707	0.0011283	0.296964	0.0449742	0.00800776	0.55728	Y	Y	N	0	0	NA	NA	NA
chr6_101214441_101215221	0.604758	-4.81588	-5.42064	0.632637	0.00493331	0.00147274	0.778314	0.0246945	0.013115	N	N	N	0	0	NA	NA	NA
chr6_111281617_111283708	0	6.63244	6.64855	1	0.00185345	0.00180664	1	0.0117011	0.0152729	N	Y	Y	0	0	NA	NA	NA
chr6_112522809_112537670	-6.34715	-5.63151	0	0.00514183	0.0130451	1	0.0185436	0.0433796	1	Y	Y	N	0	0	NA	NA	NA
chr6_117019867_117026323	-2.01694	-0.564707	1.45223	1.38584e-10	0.0642105	6.51653e-06	4.98268e-09	0.156022	0.000143184	Y	N	Y	0	0	NA	NA	NA
chr6_128540067_128563747	-6.28703	-0.793664	5.49337	0.00157359	0.629499	0.00630839	0.00904686	0.780182	0.0381823	Y	N	N	0	0	NA	NA	NA
chr6_128643184_128643455	-1.09135	-0.810824	0.280523	7.55102e-05	0.0039414	0.332363	0.000803061	0.0210853	0.598505	Y	N	N	0	0	NA	NA	NA
chr6_129932678_129939997	-6.77879	0.701522	7.48032	1.44007e-06	0.375099	1.04807e-07	2.38876e-05	0.564202	3.66e-06	Y	N	Y	0	0	NA	NA	NA
chr6_131481199_131490413	-5.89157	-5.17593	0	0.00519099	0.0140713	1	0.0186639	0.045947	NA	Y	N	N	0	0	NA	NA	NA
chr6_135639657_135644462	-6.27286	-5.55722	0	0.00241683	0.00719939	1	0.0120729	0.0316462	1	Y	Y	N	0	0	NA	NA	NA
chr6_136472298_136476896	-6.15832	-5.44268	0	0.00260834	0.0077992	1	0.0125084	0.0329408	1	Y	Y	N	0	0	NA	NA	NA
chr6_136990421_137019820	-6.82646	-0.7591	6.06736	0.00279229	0.70136	0.00823193	0.0128554	0.833372	0.0466499	N	N	N	0	0	NA	NA	NA
chr6_137015278_137019820	-3.52965	-0.368746	3.16091	1.01595e-08	0.501939	4.00569e-07	2.70525e-07	0.67991	1.19277e-05	Y	N	Y	0	0	NA	NA	NA
chr6_138794443_138817508	1.5438	-0.186937	-1.73074	0.000101322	0.666334	3.46492e-05	0.00101509	0.808296	0.000579223	Y	N	Y	0	0	NA	NA	NA
chr6_141125372_141137367	-5.81096	-5.09532	0	0.00410994	0.0118629	1	0.0156631	0.0405527	NA	Y	N	N	0	0	NA	NA	NA
chr6_142094010_142119292	0	7.49833	7.51443	1	0.000107017	0.000103427	1	0.00112246	0.00150527	N	Y	Y	0	0	NA	NA	NA
chr6_146209156_146216113	-2.69969	-0.658056	2.04164	1.42949e-07	0.182665	8.82023e-05	2.9095e-06	0.347053	0.00131908	Y	N	N	0	0	NA	NA	NA
chr6_147581751_147599340	-7.5792	-1.90662	5.67258	9.78381e-06	0.140315	0.00113878	0.000133524	0.285017	0.0106531	Y	N	N	0	0	NA	NA	NA
chr6_150092298_150094305	-0.820357	1.0593	1.87966	0.037931	0.00523471	1.59488e-06	0.0975493	0.0257482	4.13925e-05	N	N	Y	0	0	NA	NA	NA
chr6_150157221_150174296	1.05122	-5.19352	-6.24474	0.522559	0.00995317	0.00185908	0.697437	0.0365072	0.0156172	N	N	N	0	0	NA	NA	NA
chr6_151198770_151209117	-2.36394	1.11646	3.4804	0.00138542	0.0943614	2.20951e-06	0.00826698	0.211686	5.45831e-05	N	N	Y	0	0	NA	NA	NA
chr6_151226786_151247431	-6.91886	-1.87375	5.04511	0.000148619	0.19885	0.00686449	0.00139145	0.367905	0.0407262	Y	N	N	0	0	NA	NA	NA
chr6_155095123_155114110	-6.19132	0.649397	6.84071	0.000189177	0.585404	3.73625e-05	0.00171568	0.746142	0.000617905	Y	N	Y	0	0	NA	NA	NA
chr6_155095123_155116273	2.96076	3.45325	0.492489	1.34193e-10	7.96106e-14	0.228323	4.92487e-09	4.54743e-12	0.472661	Y	Y	N	0	0	NA	NA	NA
chr6_155108995_155116273	1.27208	1.90975	0.637667	0.000466722	1.58656e-07	0.063328	0.0035508	3.14779e-06	0.197227	Y	Y	N	0	0	NA	NA	NA
chr6_158733083_158735300	2.09662	2.33612	0.239503	3.41398e-05	4.98833e-06	0.602757	0.000403693	7.3609e-05	0.851777	Y	Y	N	0	0	NA	NA	NA
chr6_158850768_158852695	2.06938	2.43162	0.362235	0.0078634	0.00189721	0.619946	0.0264606	0.0119342	0.861574	Y	N	N	0	0	NA	NA	NA
chr6_158870028_158873300	1.14383	3.1721	2.02827	0.0791382	5.95019e-07	0.000734002	0.182942	1.04839e-05	0.00755523	N	Y	Y	0	0	NA	NA	NA
chr6_158994452_159029782	-2.83769	4.55058	7.38827	0.173189	0.00849769	0.000164359	0.336636	0.0342763	0.00215378	N	Y	Y	0	0	NA	NA	NA
chr6_159004986_159010814	-0.203322	1.12787	1.33119	0.113676	6.43037e-19	1.63168e-25	0.243502	6.15491e-17	5.18252e-23	N	Y	Y	0	0	NA	NA	NA
chr6_165792683_165806285	-6.04461	-5.32896	0	0.0026625	0.00808374	1	0.0125899	0.0336019	NA	Y	Y	N	0	0	NA	NA	NA
chr6_165862416_165863850	-6.51136	-5.79571	0	0.00183168	0.00554142	1	0.010118	0.0266921	1	Y	Y	N	0	0	NA	NA	NA
chr6_165862416_165868183	-6.23777	-5.52212	0	0.00301255	0.00863642	1	0.0131634	0.034477	1	Y	Y	N	0	0	NA	NA	NA
chr6_166316145_166324420	-6.37601	-5.66037	0	0.00234112	0.00690085	1	0.0117939	0.0309948	1	Y	Y	N	0	0	NA	NA	NA
chr6_168910595_168949883	0	6.5107	6.52681	1	0.00199857	0.00194784	1	0.0123848	0.0161257	N	Y	Y	0	0	NA	NA	NA
chr6_20546577_20577388	0.610183	-5.44825	-6.05843	0.541928	0.000383693	7.35471e-05	0.712221	0.00335518	0.00112	N	Y	Y	0	0	NA	NA	NA
chr6_20649524_20781496	-6.20107	-5.48543	0	0.00265892	0.00786317	1	0.0125899	0.0331018	1	Y	Y	N	0	0	NA	NA	NA
chr6_20739750_20781496	-3.18715	0.0317515	3.2189	7.85052e-06	0.959613	7.68945e-06	0.000109675	1	0.00016334	Y	N	Y	0	0	NA	NA	NA
chr6_25605040_25606501	-5.78375	-5.06811	0	0.00336356	0.0101827	1	0.0138211	0.0369483	NA	Y	N	N	0	0	NA	NA	NA
chr6_304628_348841	-5.77839	-5.06275	0	0.00276388	0.00873669	1	0.0128118	0.0345362	NA	Y	N	N	0	0	NA	NA	NA
chr6_34789430_34789732	-5.99166	0.649986	6.64165	0.0106643	0.750555	0.00465521	0.034665	0.865964	0.0306215	N	N	N	0	0	NA	NA	NA
chr6_3737313_3738382	-6.49347	-5.77783	0	0.00293128	0.00812101	1	0.0129845	0.0336452	1	Y	Y	N	0	0	NA	NA	NA
chr6_42941741_42942776	1.31332	1.57805	0.264728	0.00428793	0.000661484	0.554809	0.0161722	0.00524669	0.81153	Y	Y	N	0	0	NA	NA	NA
chr6_43106587_43107263	6.46109	7.9183	1.45721	0.000185469	4.34292e-06	0.253046	0.00168996	6.48965e-05	0.502371	N	Y	N	0	0	NA	NA	NA
chr6_43501644_43516197	6.04971	6.01485	-0.0348652	0.000213926	0.000257669	0.976304	0.00189404	0.00237022	1	Y	Y	N	0	0	NA	NA	NA
chr6_45399600_45410930	6.83588	0	-6.13634	0.00075533	1	0.00249519	0.00525025	1	0.0194882	Y	N	Y	0	0	NA	NA	NA
chr6_56535439_56569167	-5.8824	-5.16676	0	0.00337355	0.0100287	1	0.0138281	0.0366089	NA	Y	N	N	0	0	NA	NA	NA
chr6_56716195_56765419	-6.44593	-5.73028	0	0.00212412	0.0063102	1	0.0111315	0.0292699	1	Y	Y	N	0	0	NA	NA	NA
chr6_57244699_57246966	-7.57729	-1.74991	5.82738	0.000208934	0.30394	0.00477728	0.00185915	0.49106	0.0311785	NA	NA	NA	0	0	NA	NA	NA
chr6_57372288_57472441	-5.77789	-5.06225	0	0.00321827	0.00984623	1	0.0135566	0.0362957	NA	NA	NA	NA	0	0	NA	NA	NA
chr6_57393112_57398317	-1.83586	-2.25977	-0.423911	2.41565e-07	1.95054e-09	0.275239	4.72654e-06	5.70897e-08	0.53062	NA	NA	NA	0	0	NA	NA	NA
chr6_58246062_58256569	-5.91562	-5.19998	0	0.00280831	0.00862666	1	0.0128554	0.034477	NA	Y	N	N	0	0	NA	NA	NA
chr6_75078806_75081842	-7.21177	-6.49613	0	0.000156339	0.000660183	1	0.00145321	0.0052441	1	Y	Y	N	0	0	NA	NA	NA
chr6_7845373_7862731	-6.77274	-6.0571	0	0.000948004	0.00311413	1	0.00625789	0.0176271	1	Y	Y	N	0	0	NA	NA	NA
chr6_84108086_84117620	-1.13288	-0.0910744	1.04181	1.39433e-11	0.581231	1.29737e-09	5.8786e-10	0.743395	6.31637e-08	Y	N	N	0	0	NA	NA	NA
chr6_84894905_84896341	-7.15282	-0.565508	6.58731	5.77513e-05	0.676749	0.000231403	0.000635175	0.815799	0.00289037	Y	N	N	0	0	NA	NA	NA
chr6_86267694_86284096	1.24414	-1.96543	-3.20957	0.0308647	0.00381471	1.66053e-06	0.0822169	0.0205785	4.2536e-05	Y	N	Y	0	0	NA	NA	NA
chr6_87925621_87943245	-0.817227	-4.55954	-3.74231	0.506244	0.00126717	0.00831509	0.684691	0.00875642	0.0470014	N	Y	Y	0	0	NA	NA	NA
chr6_89554076_89563483	2.11493	1.33024	-0.784695	1.10651e-06	0.00306561	0.062259	1.88399e-05	0.0174127	0.195144	Y	N	N	0	0	NA	NA	NA
chr6_99860427_99864304	-6.4751	-5.75946	0	0.00268406	0.00758475	1	0.0126488	0.0324756	1	Y	Y	N	0	0	NA	NA	NA
chr6_99887645_99913012	-6.00442	-0.83716	5.16726	0.00184785	0.596748	0.00829714	0.0101539	0.753569	0.0469796	Y	N	N	0	0	NA	NA	NA
chr6_99936076_99958106	0	6.94544	6.96154	1	0.000560973	0.000544615	1	0.00459165	0.00595674	N	Y	Y	0	0	NA	NA	NA
chr7_101870647_101870949	6.90352	6.0174	-0.88612	0.000159444	0.0011123	0.535967	0.00147627	0.00791799	0.797969	Y	N	N	0	0	NA	NA	NA
chr7_102106264_102106717	1.49709	1.14693	-0.350157	7.91161e-05	0.00319833	0.346993	0.000830191	0.0179177	0.614562	Y	N	N	0	0	NA	NA	NA
chr7_103828699_103844682	-0.0592316	-1.67282	-1.61359	0.909024	0.003154	0.00442752	0.955994	0.0177441	0.0293846	N	N	N	0	0	NA	NA	NA
chr7_104678573_104681470	0.401296	-2.14135	-2.54264	0.144407	2.6829e-11	1.81575e-15	0.294087	1.13113e-09	2.57683e-13	N	Y	Y	0	0	NA	NA	NA
chr7_105103068_105108910	1.66718	1.67772	0.0105455	9.73443e-05	0.000119907	0.979274	0.000984985	0.00123624	1	Y	N	N	0	0	NA	NA	NA
chr7_105517627_105553084	7.54496	5.03648	-2.50849	4.37183e-06	0.00292622	0.0403934	6.5054e-05	0.016769	0.148935	Y	N	N	0	0	NA	NA	NA
chr7_106921745_106924177	-0.811589	-6.658	-5.84641	0.363953	5.51534e-06	7.05148e-05	0.561018	8.00515e-05	0.00108123	N	Y	N	0	0	NA	NA	NA
chr7_106921745_106938791	0.180917	-5.99335	-6.17426	0.850338	7.08186e-05	4.17454e-05	0.924616	0.000789107	0.000680211	N	Y	Y	0	0	NA	NA	NA
chr7_107188556_107198560	1.98271	-4.25569	-6.2384	0.067703	0.00751801	6.5881e-05	0.160046	0.0322532	0.00101719	N	N	N	0	0	NA	NA	NA
chr7_117825701_117828459	0.446311	-5.41949	-5.8658	0.697334	0.000900837	0.000314311	0.824852	0.00669531	0.00374367	N	Y	N	0	0	NA	NA	NA
chr7_128655033_128658211	-0.429386	-0.683584	-0.254198	0.000358267	3.32126e-08	0.0414125	0.00288364	7.42098e-07	0.151106	N	N	N	0	0	NA	NA	NA
chr7_128845044_128846428	7.52831	7.05271	-0.475601	3.98925e-08	3.23301e-07	0.516747	9.05635e-07	6.05804e-06	0.779269	Y	Y	N	0	0	NA	NA	NA
chr7_128898422_128928900	-5.77616	-5.06052	0	0.00360814	0.0107745	1	0.0144167	0.0380437	NA	N	N	N	0	0	NA	NA	NA
chr7_130737184_130738224	-7.25589	-6.54025	0	0.000142272	0.000605853	1	0.00134005	0.00488198	1	Y	Y	N	0	0	NA	NA	NA
chr7_131058469_131084192	-6.26149	-0.4523	5.80919	0.00129321	0.775277	0.00306246	0.0078356	0.882021	0.0227214	N	N	N	0	0	NA	NA	NA
chr7_131071879_131084192	1.14687	0.127153	-1.01972	2.15828e-05	0.656753	0.000240179	0.000269613	0.801479	0.00296666	Y	N	Y	0	0	NA	NA	NA
chr7_137597737_137600758	-1.089	-3.54178	-2.45278	0.161038	0.000103076	0.00769289	0.319774	0.00108968	0.0442444	N	Y	N	0	0	NA	NA	NA
chr7_138738197_138740041	-6.07387	-5.35823	0	0.00341245	0.00979632	1	0.0139391	0.0362147	NA	Y	Y	N	0	0	NA	NA	NA
chr7_140055468_140058585	-1.57613	-0.896455	0.679675	2.76361e-06	0.00778965	0.0549439	4.3116e-05	0.0329408	0.179119	Y	N	N	0	0	NA	NA	NA
chr7_152007051_152012423	-1.39129	-1.7416	-0.350318	1.0187e-05	6.79702e-08	0.283846	0.000138227	1.44142e-06	0.541239	Y	Y	N	0	0	NA	NA	NA
chr7_152760682_152768089	-4.95205	2.68358	7.63563	0.00363227	0.03072	5.1756e-06	0.0144861	0.0863451	0.00011782	N	N	Y	0	0	NA	NA	NA
chr7_155465561_155473602	0.150919	0.818853	0.667934	0.486662	0.000161699	0.00204795	0.667898	0.00158851	0.016735	N	N	N	0	0	NA	NA	NA
chr7_156619299_156629579	0.328466	-0.474827	-0.803293	0.0213182	0.00162496	7.80865e-08	0.0627584	0.0105982	2.83064e-06	N	N	N	0	0	NA	NA	NA
chr7_157361594_157370832	6.68291	8.16285	1.47994	7.7075e-05	1.28852e-06	0.225582	0.000813595	2.1274e-05	0.469509	N	Y	N	0	0	NA	NA	NA
chr7_158552177_158557544	1.73401	-0.156823	-1.89084	5.41941e-35	0.313561	5.32604e-37	1.82789e-32	0.502023	3.94718e-34	Y	N	Y	0	0	NA	NA	NA
chr7_158566032_158591763	0.0327455	-0.981403	-1.01415	0.893142	0.000215363	0.000129204	0.946496	0.00203118	0.00177689	N	N	Y	0	0	NA	NA	NA
chr7_158580695_158591763	-0.157279	-0.801064	-0.643785	0.50457	0.000911488	0.00777967	0.683648	0.00676028	0.0445411	N	N	N	0	0	NA	NA	NA
chr7_158590633_158591763	2.94237	3.81801	0.875648	0.00957548	0.000759692	0.38838	0.0315163	0.00588331	0.662356	N	Y	N	0	0	NA	NA	NA
chr7_16722405_16729531	2.77214	3.41677	0.644638	0.000165169	3.51418e-06	0.311111	0.00152528	5.32996e-05	0.573711	Y	Y	N	0	0	NA	NA	NA
chr7_2054137_2108973	2.91697	1.17528	-1.74168	3.34754e-06	0.0710681	0.0046899	5.13217e-05	0.169088	0.030789	Y	N	Y	0	0	NA	NA	NA
chr7_22306583_22357656	9.84691	0	-9.14737	9.85123e-16	1	8.76451e-14	7.26836e-14	1	1.04765e-11	Y	N	Y	0	0	NA	NA	NA
chr7_22330794_22357656	11.6086	0	-10.9091	5.11916e-22	1	1.25123e-19	6.97289e-20	1	2.45463e-17	Y	N	Y	0	0	NA	NA	NA
chr7_22347958_22357656	10.0754	0	-9.37588	1.57828e-16	1	1.62132e-14	1.27033e-14	1	2.07965e-12	Y	N	Y	0	0	NA	NA	NA
chr7_22999875_23030758	-0.153221	-4.88068	-4.72745	0.621854	1.62404e-16	1.4418e-15	0.769975	1.29248e-14	2.13706e-13	N	Y	Y	0	0	NA	NA	NA
chr7_23015829_23023664	-7.12175	-6.4061	0	0.000245525	0.000972343	1	0.00212079	0.00715027	1	Y	Y	N	0	0	NA	NA	NA
chr7_23015829_23030758	-7.63479	-5.04662	2.58816	6.13395e-06	0.00139345	0.187824	8.84862e-05	0.00940481	0.415519	Y	Y	N	0	0	NA	NA	NA
chr7_2311485_2317940	6.71542	0	-6.01589	0.00159557	1	0.00468589	0.00912876	1	0.030789	Y	N	Y	0	0	NA	NA	NA
chr7_23435746_23458443	-6.1234	-5.40776	0	0.00290944	0.00855841	1	0.0129771	0.0344036	NA	Y	Y	N	0	0	NA	NA	NA
chr7_2393549_2400537	8.45289	0	-7.75335	6.75887e-08	1	7.39222e-07	1.47302e-06	1	2.08043e-05	Y	N	Y	0	0	NA	NA	NA
chr7_2414163_2416710	6.72551	7.55656	0.831053	0.000157177	2.1537e-05	0.536943	0.00145909	0.000274365	0.798268	Y	Y	N	0	0	NA	NA	NA
chr7_30363258_30405911	0.407847	-6.24643	-6.65428	0.573344	5.50646e-06	1.22726e-06	0.733826	8.00515e-05	3.27432e-05	N	Y	Y	0	0	NA	NA	NA
chr7_32914319_32914769	2.3989	3.2395	0.840601	0.00580062	0.000190064	0.286988	0.0204611	0.0018239	0.544739	N	Y	N	0	0	NA	NA	NA
chr7_33185854_33217203	-0.988744	-1.31109	-0.322344	1.61108e-05	2.62333e-08	0.176546	0.00020598	6.01329e-07	0.39818	Y	Y	N	0	0	NA	NA	NA
chr7_33303902_33313568	-6.09387	-5.37823	0	0.00316487	0.00919631	1	0.0135052	0.0352285	NA	Y	Y	N	0	0	NA	NA	NA
chr7_40037093_40087476	0.338312	-5.72004	-6.05835	0.77382	0.00054762	0.0002453	0.877506	0.00449976	0.00301873	N	Y	Y	0	0	NA	NA	NA
chr7_42063067_42066011	7.80001	0	-7.10047	2.41107e-06	1	1.76607e-05	3.7866e-05	1	0.000327213	Y	N	Y	0	0	NA	NA	NA
chr7_42079637_42088295	4.87723	-1.13087	-6.0081	0.00831563	0.604508	0.00189895	0.0277174	0.759441	0.0158523	Y	N	Y	0	0	NA	NA	NA
chr7_42116351_42262894	7.74695	0	-7.04741	5.84062e-06	1	3.74263e-05	8.44268e-05	1	0.000617905	Y	N	Y	0	0	NA	NA	NA
chr7_42185037_42188067	3.99615	-3.17213	-7.16828	0.00999493	0.102684	0.000137937	0.0327172	0.225873	0.0018662	N	N	Y	0	0	NA	NA	NA
chr7_42187825_42262894	9.39994	0	-8.7004	9.75096e-14	1	5.57097e-12	5.48143e-12	1	4.70359e-10	Y	N	Y	0	0	NA	NA	NA
chr7_43436413_43447330	-6.37128	-5.65564	0	0.00226431	0.00672355	1	0.0116387	0.0305275	1	Y	Y	N	0	0	NA	NA	NA
chr7_44025791_44026276	-6.19682	1.13959	7.33641	6.24744e-05	0.265374	2.00383e-06	0.000677651	0.447879	5.00581e-05	N	N	Y	0	0	NA	NA	NA
chr7_47384353_47385954	-2.20996	0.658906	2.86886	1.53049e-08	0.0601265	2.14635e-13	3.84415e-07	0.148131	2.30905e-11	Y	N	Y	0	0	NA	NA	NA
chr7_47436397_47440511	-0.0752945	1.38266	1.45795	0.882701	0.00524728	0.00334334	0.941876	0.0257922	0.0242392	N	N	N	0	0	NA	NA	NA
chr7_48033912_48035743	-6.38578	-5.67014	0	0.00231453	0.00682706	1	0.011735	0.0308393	1	Y	Y	N	0	0	NA	NA	NA
chr7_50737419_50778687	-5.86194	-5.1463	0	0.00323124	0.00972877	1	0.0135908	0.0361191	NA	Y	N	N	0	0	NA	NA	NA
chr7_50771518_50823753	-6.22488	-5.50924	0	0.00247683	0.00740067	1	0.0122147	0.032029	1	Y	Y	N	0	0	NA	NA	NA
chr7_550446_552092	5.81055	7.06181	1.25126	0.00228071	0.000200271	0.40784	0.0116837	0.00189895	0.682804	N	Y	N	0	0	NA	NA	NA
chr7_550446_557127	6.29279	7.53038	1.23759	0.000880714	6.65364e-05	0.406725	0.0059185	0.000750284	0.681895	N	Y	N	0	0	NA	NA	NA
chr7_56049903_56051561	-1.23647	0.048662	1.28513	3.94265e-05	0.869533	2.38108e-05	0.000454078	0.947961	0.000423515	Y	N	Y	0	0	NA	NA	NA
chr7_56150971_56151408	3.41066	3.90464	0.493981	0.00530003	0.00144681	0.640329	0.0189788	0.00964949	0.876103	N	Y	N	0	0	NA	NA	NA
chr7_5680785_5692141	1.60629	0.069071	-1.53722	5.92157e-08	0.83252	7.24533e-07	1.30662e-06	0.92331	2.05644e-05	Y	N	Y	0	0	NA	NA	NA
chr7_618893_635941	4.03197	4.1472	0.115235	1.05314e-08	5.11082e-09	0.829853	2.78334e-07	1.326e-07	0.990536	Y	Y	N	0	0	NA	NA	NA
chr7_618893_647089	6.2957	0	-5.59616	0.002283	1	0.00669349	0.0116837	1	0.0399334	Y	N	N	0	0	NA	NA	NA
chr7_618893_751164	4.46954	4.01913	-0.450403	5.81419e-12	9.27812e-10	0.382817	2.62305e-10	2.85726e-08	0.655892	Y	Y	N	0	0	NA	NA	NA
chr7_635783_647089	3.9414	3.89456	-0.0468404	0.000493578	0.000622271	0.961956	0.00371126	0.00499155	1	Y	Y	N	0	0	NA	NA	NA
chr7_635783_751164	3.3746	3.58751	0.212912	2.16892e-06	5.53086e-07	0.729392	3.43562e-05	9.79378e-06	0.935393	Y	Y	N	0	0	NA	NA	NA
chr7_716866_720363	2.99807	2.01042	-0.987647	1.85786e-12	5.40516e-06	0.0109349	9.01314e-11	7.87751e-05	0.0578853	Y	Y	N	0	0	NA	NA	NA
chr7_73520205_73520573	3.62375	4.10492	0.481177	0.000592709	0.000103336	0.590771	0.00427511	0.00109081	0.841615	Y	Y	N	0	0	NA	NA	NA
chr7_73770740_73774608	6.51525	0	-5.81572	0.00162462	1	0.00490714	0.0092427	1	0.0318702	Y	N	N	0	0	NA	NA	NA
chr7_74119496_74133260	-0.121977	-1.16615	-1.04417	0.592202	1.35625e-06	1.56902e-05	0.748529	2.21855e-05	0.00029647	N	Y	Y	0	0	NA	NA	NA
chr7_76240771_76247617	6.5534	5.66326	-0.890139	0.000544001	0.00312453	0.559347	0.00400953	0.0176484	0.816198	Y	N	N	0	0	NA	NA	NA
chr7_77026299_77035422	6.56084	0	-5.8613	0.00167429	1	0.00499199	0.00946623	1	0.0321876	N	N	N	0	0	NA	NA	NA
chr7_77214860_77230123	1.25683	-0.0915605	-1.34839	1.31752e-08	0.705284	7.15986e-09	3.40584e-07	0.836072	3.16267e-07	Y	N	Y	0	0	NA	NA	NA
chr7_77407655_77408131	1.30439	0.939354	-0.365032	3.71882e-06	0.00132384	0.189469	5.65244e-05	0.0090597	0.418324	Y	N	N	0	0	NA	NA	NA
chr7_8043538_8047896	-6.34456	-5.62891	0	0.00257348	0.00748335	1	0.0124241	0.0321752	1	Y	Y	N	0	0	NA	NA	NA
chr7_8043538_8064444	-4.82688	-5.45218	-0.625293	0.000199201	0.00033144	0.703541	0.00178827	0.00295666	0.919007	Y	Y	N	0	0	NA	NA	NA
chr7_8043538_8099878	-8.2956	-7.57995	0	1.09144e-08	1.76262e-07	1	2.86321e-07	3.46796e-06	1	Y	Y	N	0	0	NA	NA	NA
chr7_80447615_80458061	-7.73357	-7.01793	0	5.32415e-06	3.62132e-05	1	7.72765e-05	0.000434007	1	Y	Y	N	0	0	NA	NA	NA
chr7_8095063_8110761	-6.66712	-5.95148	0	0.00147084	0.00452556	1	0.00862416	0.0232202	1	Y	Y	N	0	0	NA	NA	NA
chr7_810108_814799	2.90239	2.86674	-0.035656	2.63049e-12	9.90093e-12	0.92036	1.25045e-10	4.4954e-10	1	Y	Y	N	0	0	NA	NA	NA
chr7_83739786_83823984	0	6.51963	6.53573	1	0.0019713	0.00192121	1	0.0122587	0.0159981	N	Y	Y	0	0	NA	NA	NA
chr7_83758439_83823984	0	6.59949	6.61559	1	0.00174684	0.00170205	1	0.0112073	0.0145734	N	Y	Y	0	0	NA	NA	NA
chr7_87369107_87370895	-5.95925	-5.2436	0	0.00281588	0.00857804	1	0.0128554	0.0344112	NA	Y	N	N	0	0	NA	NA	NA
chr7_87593949_87607727	0.812265	0.950246	0.137981	0.0135662	0.00434906	0.672684	0.0425364	0.0226004	0.897236	N	N	N	0	0	NA	NA	NA
chr7_90355881_90377090	-7.29835	-6.58271	0	8.44838e-05	0.000391386	1	0.000877418	0.00340983	1	Y	Y	N	0	0	NA	NA	NA
chr7_90355881_90419967	-6.75177	-6.03613	0	0.000949892	0.00313015	1	0.00626438	0.017666	1	Y	Y	N	0	0	NA	NA	NA
chr7_90376996_90419967	-6.49437	-5.77872	0	0.00172267	0.0052885	1	0.00967617	0.0259408	1	Y	Y	N	0	0	NA	NA	NA
chr7_90537633_90585132	-5.79025	-5.07461	0	0.0033388	0.0101119	1	0.0138055	0.0367861	NA	Y	N	N	0	0	NA	NA	NA
chr7_91948644_91957214	0.0886577	-3.14316	-3.23182	0.926905	0.00823255	0.00654271	0.9689	0.0338428	0.0392445	N	N	N	0	0	NA	NA	NA
chr7_94248070_94259153	-7.2708	-6.55515	0	0.000148364	0.000625337	1	0.00139145	0.00501048	1	Y	Y	N	0	0	NA	NA	NA
chr7_943763_959687	0	6.60428	6.62039	1	0.00142117	0.00138347	1	0.00955044	0.0125207	N	Y	Y	0	0	NA	NA	NA
chr7_959605_975141	4.82568	6.41144	1.58576	0.000135149	3.43784e-07	0.0357509	0.00128319	6.3744e-06	0.136653	Y	Y	N	0	0	NA	NA	NA
chr7_98984308_98985884	6.61098	0	-5.91145	0.00132295	1	0.00408951	0.00798588	1	0.0280917	Y	N	N	0	0	NA	NA	NA
chr7_98985662_98987635	6.90529	5.15218	-1.75311	0.00024707	0.00731942	0.251179	0.00212895	0.0319379	0.500055	Y	N	N	0	0	NA	NA	NA
chr8_104709314_104709524	6.23346	0	-5.53393	0.00319358	1	0.008856	0.0135221	1	0.049348	Y	N	N	0	0	NA	NA	NA
chr8_106427103_106456609	7.62088	0	-6.92134	1.96554e-05	1	0.000105791	0.000246842	1	0.00152882	Y	N	Y	0	0	NA	NA	NA
chr8_106431372_106456609	9.85733	0	-9.15779	1.11417e-15	1	9.70482e-14	8.05269e-14	1	1.13563e-11	Y	N	Y	0	0	NA	NA	NA
[truncated: 5,089 more rows]

## Sheet: C_CRC_annotations
circ2disease
ID	CircRNA name	Synonyms	Chromosome	Start	End	Strand	Genome version	Gene Symbol	Sequence	Type	Disease name	Methods	Sample	Location	Expression pattern	miRNA validate	miRNA target validate	RBP validated	RBP Target Validated	Functional Description	PubMed ID	Year	Journal	Title	Note
chr8_141710990_141716304_-	hsa_circRNA_104700	hsa_circ_0005273	chr8	141710989	141716304	-	hg19	PTK2	CCCAGCAGACCGGGTTATCCCAGTCCGAGGTCCAGCGAAGGATTTTATCCCAGCCCACAGCACATGGTACAAACCAATCATTACCAGGTTTCTGGCTACCCTGGTTCACATGGAATCACAGCCATGGCTGGCAGCATCTATCCAGGTCAGGCATCTCTTTTGGACCAAACAGATTCATGGAATCATAGACCTCAGGAGATAGCAATGTGGCAGCCCAATGTGGAGGACTCTACAGTATTGGACCTGCGAGGGATTGGGCAAGTGTTGCCAACCCATCTGATGGAAGAGCGTCTAATCCGACAGCAACAGGAAATGGAAGAAGATCAGCGCTGGCTGGAAAAAGAGGAAAGATTTCTG	exonic	colorectal cancer	Microarray; qRT-PCR	paired CRC tissues and matched adjacent non-cancerous tissue samples	N/A	down-regulated	N/A	N/A	N/A	N/A	The expression level of hsa_circRNA_104700 was significantly correlated with distal metastasis ( p = 0.036).The area under receiver operating characteristic curves of hsa_circRNA_104700 was 0.616 ( p < 0.0001).	28349836	2017.3	Tumour Biol.	Identification of differentially expressed circular RNAs in human colorectal cancer	N/A
CircFunBase
ID	circRNA	Position	Function	Gene	Gene Description	PMID
chr1_212502477_212506940_+	hsa_circ_0002321	chr1:212502476-212506940	Colorectal cancer [differential expression (chemoradiation-resistant colorectal cancer cells)]	PPP2R5A	protein phosphatase 2 regulatory subunit B'alpha	28656150
chr1_22404922_22413359_+	hsa_circ_0005576	chr1:22404921-22413359	Colorectal cancer [differential expression (chemoradiation-resistant colorectal cancer cells)]	CDC42	cell division cycle 42	28656150
chr2_183993015_183995273_+	hsa_circ_0004820	chr2:183993014-183995273	Colorectal cancer [differential expression (chemoradiation-resistant colorectal cancer cells)]	NUP35	nucleoporin 35	28656150
chr20_2944918_2945848_+	circ_004661	chr20:2944917-2945848	IMP3-associated circRNA; colorectal cancer [differential expression (colorectal cancer vs. normal colon mucosa)], gastric cancer [differential expression (gastric cancer tissues vs. normal tissues)]	PTPRA	protein tyrosine phosphatase, receptor type A	27510448;25624062;27986464
chr8_141710990_141716304_-	hsa_circ_0005273	chr8:141710989-141716304	Basal cell carcinoma [differential expression (basal cell carcinoma vs. control)]; bladder cancer [differential expression (bladder cancer vs normal tissues)]; preeclampsia [differential expression (placental tissue for patients with preeclampsia vs. controls)]; colorectal cancer [differential expression (normal vs. malignant colorectal cancer tissues)]	PTK2	protein tyrosine kinase 2	27097056;27484176;27606420;28349836
