# Supplementary material for: Docker4Circ: A Framework for the Reproducible Characterization of circRNAs from RNA-Seq Data
Source: Int J Mol Sci. 2019 Dec 31;21(1):293. doi: 10.3390/ijms21010293 (PMC6982331; doi:10.3390/ijms21010293)
Supplement: Supplementary file 1 [file ijms-21-00293-s001.zip › Supplementary_Table_9_Running_times.xlsx]

## Sheet: Sheet1
Module	Function	Running Time (minutes)
1	fastqc	0.18 (average)
1	bwa	170.23 (average)
1	ciri2	29.98 (average)
1	starChimeric	77.27 (average)
1	starchipCircle	184.25
2	circrnaMergePredictions	0.2
2	circrnaPrepareFiles	4.91
2	circrnaClassification	1.01
2	circrnaAnnotations	4.14706
3	ciri_as	95.19 (average)
3	circrnaBSJunctions	0.17
4	wrapperDeseq2	0.35 (average)
4	circrnaQuantification	54.52 (average)
	Total analysis (CIRI2 only)	360.687
	Total analysis (CIRI2 and STARchip)	622.21
				Running times (minutes)
Dataset ID	Experiment	Reads	Number of circRNA	AS events	Run time (FASTQC)	Run time (BWA)	Run time (CIRI2)	Run time (CIRI AS)	Run time (starChimeric)
SRR5889371	NCM460_R1	66144999	14003	1482	0.17	160.81	28.85	86.3674	72.1
SRR5889366	NCM460_R2	70945094	16006	1790	0.17	169.02	27.7	103.801	74.96
SRR5889367	NCM460_R3	73804226	12413	1078	0.18	151.85	26.38	97.0307	68.38
SRR5889368	SW480_R1	88915933	8627	532	0.17	203.69	35.09	92.2566	100.74
SRR5889369	SW480_R2	97303573	5688	335	0.18	173.86	31.53	119.197	85.4
SRR5889362	SW480_R3	66144999	7154	470	0.18	193.35	34.15	100.954	95.52
SRR5889363	SW620_R1	91406400	10216	790	0.18	187.72	31.68	125.813	81.73
SRR5889364	SW620_R2	67013355	4624	214	0.17	143.68	24.47	60.291	56.61
SRR5889365	SW620_R3	69789394	6541	332	0.18	148.1	29.9852	71.0257	59.99
Dataset ID	Reads	Run time quantification (minutes)
SRR6067723	14343552	30.69
SRR6067725	3111099	61.36
SRR6067727	29789542	62.17
SRR6067729	31001854	64.54
SRR6067731	48939474	84.21
SRR6067733	1430999	24.16
